# Supplementary material for: The Hippo pathway controls myofibril assembly and muscle fiber growth by regulating sarcomeric gene expression
Source: eLife journal article supplement (doi:10.7554/elife.63726), 2021-01-06
Supplement: supp [file elife-63726-supp-v1.zip]

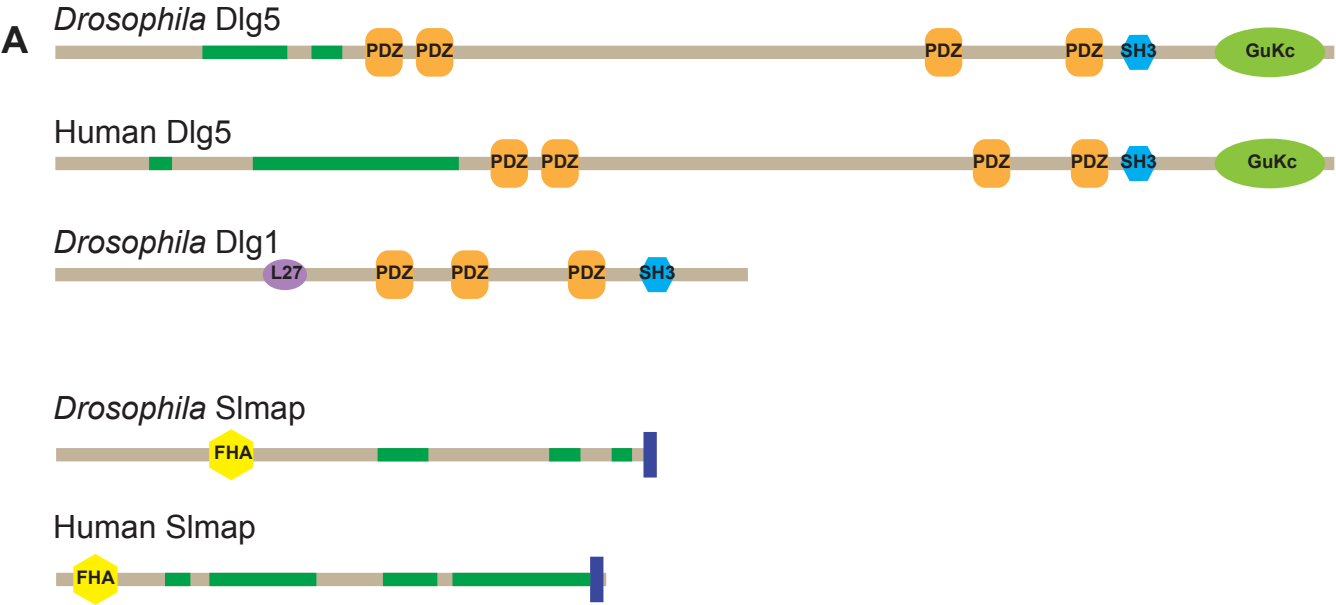

**B**

| Genotype                                           | Phenotype |            |
|----------------------------------------------------|-----------|------------|
|                                                    | Lethality | Flight     |
| <i>Mef2</i> -GAL4; +                               | viable    | wild type  |
| <i>Mef2</i> -GAL4; <i>Dlg5</i> -IR-1 (VDRC 22496)  | viable    | flightless |
| <i>Mef2</i> -GAL4; <i>Dlg5</i> -IR-2 (VDRC 101596) | viable    | flightless |
| <i>Mef2</i> -GAL4; <i>Dlg5</i> -IR-3 (BDSC 30925)  | viable    | flightless |
| <i>Mef2</i> -GAL4; <i>Slmap</i> -IR-1 (VDRC 8199)  | viable    | flightless |
| <i>Mef2</i> -GAL4; <i>Slmap</i> -IR-2 (BDSC 32509) | viable    | flightless |

**Figure 1 - Supplement 1**
