# Supplementary material for: The Hippo pathway controls myofibril assembly and muscle fiber growth by regulating sarcomeric gene expression
Source: eLife. 2021 Jan 6;10:e63726. doi: 10.7554/eLife.63726 (PMC7815313; doi:10.7554/eLife.63726)
Supplement: Supplementary file 1. [file elife-63726-supp1.xlsx]

## Sheet: Figure_1_wt_volume
sample name	cross-section area (um2, DLM4)	sample name	fiber length (um)	volume (um3)
24h APF						time point	volume	normalized to 24h APF	normalized to previous time point
06.06.2018, pupa1	1380					24h APF	280126	1
06.06.2018, pupa5	1391					32h APF	459984	1.64206	1.64206
07.06.2018, pupa1	1060					48h APF	1205712	4.30418	2.6212
07.06.2018, pupa3	1039					90h APF	2945195	10.5138	2.4427
07.06.2018, pupa4	1135
06.07.2018, pupa5	823
06.07.2018, pupa6	701
06.07.2018, pupa7	710
average	1029.88		272	280126
			(From Fig1C)
32h APF
04.10.2018, pupa1	1976
04.10.2018, pupa2	2421
17.09.2020, pupa1	2330
17.09.2020, pupa3	1561
average	2072		222	459984
			(From Fig1C)
48h APF
25.06.2018, pupa3	1708	26.01.2018, pupa1	641
25.06.2018, pupa6	2239	26.01.2018, pupa2	656
25.06.2018, pupa7	1664	26.01.2018, pupa3	567
25.06.2018, pupa8	1582	26.01.2018, pupa4	667
25.06.2018, pupa9	2049	26.01.2018, pupa1	435
26.06.2018, pupa1	2483	26.09.2018, pupa3	449
26.06.2018, pupa2	2066	26.09.2018, pupa4	525
26.06.2018, pupa5	1728	26.09.2018, pupa5	569
16.09.2020, pupa1	2699	26.09.2018, pupa6	441
16.09.2020, pupa2	2845	26.09.2018, pupa7	458
16.09.2020, pupa3	3133	26.09.2018, pupa8	516
16.09.2020, pupa4	2027	26.09.2018, pupa9	505
16.09.2020, pupa5	2209	26.09.2018, pupa10	503
16.09.2020, pupa7	2628	26.09.2018, pupa11	567
16.09.2020, pupa8	2179	29.09.2018, pupa1	496
16.09.2020, pupa9	2938	29.09.2018, pupa2	609
		29.09.2018, pupa3	594
		29.09.2018, pupa4	499
		29.09.2018, pupa5	465
		29.09.2018, pupa6	503
average	2261.06		533.25	1.20571e+06
90h APF
31.01.2020, pupa3	4027	20.02.2018, pupa1	675
31.01.2020, pupa4	3340	20.02.2018, pupa2	798
31.01.2020, pupa7	3951	20.02.2018, pupa3	746
		20.02.2018, pupa4	731
		29.10.2018, pupa1	791
		29.10.2018, pupa4	802
		29.10.2018, pupa5	789
		29.10.2018, pupa6	764
		29.10.2018, pupa7	754
		10.09.2019, pupa1	839
		10.09.2019, pupa2	831
		10.09.2019, pupa4	848
average	3772.67		780.667	2.9452e+06

## Sheet: Figure_1_FiberLengths
Time point	24 h APF																						32 h APF
Mef2-GAL4	wild type				Dlg5-IR-1				Dlg5-IR-2				Slmap-IR-1				Slmap-IR-2						wild type				Dlg5-IR-1				Dlg5-IR-2				Slmap-IR-1				Slmap-IR-2
	data acquisition	pupae number	fiber length[µm]	av fiber length [µm]	data acquisition	pupae number	fiber length[µm]	av fiber length [µm]	data acquisition	pupae number	fiber length[µm]	av fiber length [µm]	data acquisition	pupae number	fiber length[µm]	av fiber length [µm]	data acquisition	pupae number	fiber length[µm]	av fiber length [µm]			data acquisition	pupae number	fiber length[µm]	av fiber length [µm]	data acquisition	pupae number	fiber length[µm]	av fiber length [µm]	data acquisition	pupae number	fiber length[µm]	av fiber length [µm]	data acquisition	pupae number	fiber length[µm]	av fiber length [µm]	data acquisition	pupae number	fiber length[µm]	av fiber length [µm]
	05.12.2016	6	246		29.05.2017	1	359		18.07.2017	4	356		18.07.2017	4	240		05.12.2016	1	306				09.02.2017	2	217		11.07.2017	4	387		26.07.2017	4	345		14.06.2017	3	318		16.10.2017	2	254
			266				357				355				267				298	302					241				384				341				305				258
			269				360	359			359				307			5	216						266				373	382			325				288	304			278
			270	263	12.10.2017	1	274				359	358			305				244						274			1	341				318	333	20.06.2017	4	300				281	268
		5	219				297			3	345				315	287			278						264	253			322			3	320				306			1	267
			219				321				346			3	233				304	261				1	266				302	322			322				284				273
			225				319				338	343			262			4	300						257	262	02.10.2017	3	415				313				262	288			259	267
			228				326	308		2	336				309				308				23.02.2017	2	140				419				303	315		3	272		07.11.2017	2	286
			251		19.10.2019	4	360				333				311				336	315					156				408	414		2	256				290				283
			247	232			350				331				310			2	286						147	148		2	322				276	266			300				286	285
		4	305				346	352			336	334			305	289			290	288				1	168				415	369		1	333				300			1	272
			325			3	290			1	301		15.09.2017	1	259		06.12.2016	2	330						194			1	311				329				274				294
			317	316			299				332				285				330						216				303	307			314	326			260	283			280	282
		3	224				315				339				283	276			318	326					217		08.12.2017	2	344		29.08.2017	1	378			2	311		14.11.2017	4	289
			235				313				337			3	207			1	341						220	203			390				362				320				301	295
			247	236			315	307			343	331			252				374				19.05.2017	1	254				419				351	364			310			3	372
		2	269			2	343		15.09.2017	4	360				245				300	339					262	258			421	394	12.10.2017	3	281				285	307			355	364
			284				346	345			380				261		13.12.2016	5	270					7	205			1	396				296			1	203			2	348
			291			1	347				384				257	245			310						227				421				299				215				324	336
			306	288			367				384	377		4	304				289	290					248				412				285	291			230			1	355
	06.12.2016	10	298				382			3	334				311			4	315						250				385	404		2	301				239				348
			303				380	369			364				316	311			324						261		08.11.2017	7	323				286				225	223			331
			296	299	31.10.2017	5	344				375			5	245				302	314					247	240			344				278	289	05.07.2017	7	358				314
		9	256				364				382				261			3	308					6	176				341			1	279				346				295	329
			274				342	350			382	368			259				288						195				318	332			288				355
			300			4	330			2	400				264	258			275	291					220			6	332				298	289			326	347
			304				345				393			2	297			2	324						224				349		07.11.2017	7	332			6	342
			328				367				385	393			292				339	332					226	209			351				360				351
			330	299			350			1	376				302	297	18.07.2017	6	334					5	192				321	339			335	343			346
		7	294				355	350			375	376	12.10.2017	2	353				351	343					211			5	241			6	298				309	337
			312			3	277		12.10.2017	6	315				359			5	356						232				269				321			5	231
			309	305			276	277			363				367	360			346						238				277				301	307			266
		6	261			2	316				362			1	302				347	350					231				273			5	269				267
			282				319				349	348			302			3	295						222	221			254	263			278				261
			286	277			309	315		4	283				310				309					4	186			4	338				285	278			262
		5	315			1	365				301				314	307			311	305					215				353			4	299				250	257
			311	313			372				341		24.01.2019	1	326			2	342						241				349	347			324			4	253
		4	235				355	364			364	323			287	307			359						252			3	314				338				260
			246		19.02.2018	1	325			3	282			2	402				339	347					254				343				321				270
			258				322	324			309				380	391		1	350						240	232			343				293	315			248
			257	249	28.02.2018	1	254				350								348	349				3	199				309	328		3	270				246
		3	242				274				367						08.09.2017	1	313						255			2	273				288				245	254
			256				296	275			362								294	304					263				288				289			3	340
			263	254							360	339					19.10.2017	1	346						264				274				278				324
		2	246							2	291								338						261	249			249	271			261	278			312	326
			255								375								338	341				2	220			1	360			2	291			2	215
			270								387						31.10.2017	2	378						254				360				272				252
			269	260							370								388						261				334	352			253	272			263
		1	234								370	359							382	383					268		26.07.2017	2	320			1	396				272
			231														08.11.2017	7	321						254	252			384				376				267
			242																318				23.05.2017	6	176				392				354	376			245	253
			257																310	317					199				392	372					07.07.2017	7	334
			251	243														6	334						223			1	340								365
	28.05.2017	1	273																339	337					242				320	330							355
			290															5	282						246		03.07.2017	4	401								340	349
			277																336	309					236	221			389							6	317
			269	278														3	319					5	181				420								355
	18.07.2017	3	222																332	326					196				369	395							337
			248															2	303						222			1	372								333
			282																298						234				360								324	334
			282																297						238				340	358						3	271
			301																297	299					226	217	22.06.2017	1	340								332
			282	270														1	337					4	169				361								353
		2	208																336	337					200				352	351							352
			228																						225		18.06.2017	4	283								350
			259																						233				310								318	330
			277																						233				327							1	225
			290																						221	214			331								277
			273	256																				3	224				304	311							282
		1	234																						239			1	339								284
			237																						240	235			359								287
			248																					2	178				346	348							262	270
			263																						203		23.05.2017	5	249						03.08.2017	3	268
			274	252																					233				230	240							323
Average fiber length [µm]				271.667				330.385				354.083				302.545				321.042					239			3	312								348
p value (Student's t test)								<0.001				<0.001				0.0218				<0.001					237				330								349	322
								***				***				*				***					221	219			334	326						2	269
Descriptive statistics (Software: Graphpad)																								1	156			2	267								327
Number of values				18				13				12				11				24					167				259								367
Minimum				232.0				275.0				323.0				245.0				261.0					167				248								377
25% Percentile				251.3				307.5				335.3				276.0				302.5					152	161			234	252							365
Median				266.5				345.0				353.0				297.0				321.5			13.06.2017	4	223			1	254								341	341
75% Percentile				299.0				355.5				374.0				311.0				340.5					239				261							1	367
Maximum				316.0				369.0				393.0				391.0				383.0					263				258								362
Range				84.00				94.00				70.00				146.0				122.0					276				235	252							340	357
																									257	252									28.11.2017	9	316
Mean				271.7				330.4				354.1				302.5				321.0				3	238												338
Std. Deviation				26.52				31.80				21.41				42.06				26.56					293												360	338
Std. Error of Mean				6250				8819				6181				12.68				5421					280	271										7	340
																								2	167												333	337
Unpaired t test, comparing each sample to wild type (Software: Graphpad)																									179											5	358
P value								<0.001				<0.001				0.0218				<0.001					205												368
P value summary								***				***				*				***					215												362	363
Significantly different (P < 0.05)?								Yes				Yes				Yes				Yes					213											3	323
One- or two-tailed P value?								Two-tailed				Two-tailed				Two-tailed				Two-tailed					203	197											341
t, df								t=5.598, df=29				t=8.976, df=28				t=2.435, df=27				t=5.967, df=40				1	232												358
																									263												346	342
How big is the difference?																									279										21.12.2017	4	246
Mean of wild type								271.7				271.7				271.7				271.7					285												273
Mean of sample								330.4				354.1				302.5				321.0					288												303
Difference between means ± SEM								58.72 ± 10.49				82.42 ± 9.182				30.88 ± 12.68				49.38 ± 8.275					289	273											293
95% confidence interval								37.26 to 80.17				63.61 to 101.2				4.858 to 56.90				32.65 to 66.10			18.06.2017	5	219												279	279
R squared (eta squared)								0.5193				0.7421				0.1801				0.4709					235											3	265
																									266												260
F test to compare variances																									279												247	258
F, DFn, Dfd								1.438, 12, 17				1.534, 17, 11				2.516, 10, 17				1.003, 23, 17					272											2	278
P value								0.4805				0.4752				0.0905									264	256											294
P value summary								ns				ns				ns								4	251												294
Significantly different (P < 0.05)?								No				No				No				No					271												296
																									294												285	290
																									303											1	282
																									301												276
																									285	285											287	282
																								3	239										14.03.2018	5	338
																									262												330	334
																									295											4	330
																									297												343
																									298												350	341
																									290	281										3	234
																								2	217												250
																									236												260
																									255												262
																									261												255
																									263												243	251
																									253	248									26.06.2018	5	287
																								1	242												294
																									260												281	288
																									282											2	321
																									291												338
																									295												344
																									281	276											346	338
																							20.06.2017	3	215											1	361
																									241												348	355
																									262
																									270	247
																								2	121
																									130
																									133
																									134
																									134	131
																								1	117
																									129
																									134
																									125
																									123
																									121	125
																							08.12.2017	1	157
																									175
																									182
																									191	177
																							21.12.2017	1	197
																									220
																									235
																									234
																									230
																									236	226
																							07.03.2018	1	135
																									153
																									182
																									191
																									173	167
																							27.11.2018	1	145
																									171
																									183
																									174
																									164
																									161	167
																								5	156
																									173
																									185
																									186
																									174
																									168	174
																								4	246
																									261
																									261	256
																								2	144
																									166
																									184
																									195
																									182
																									180	176
																								3	187
																									249
																									242
																									237	229
																							12.09.2019	2	196
																									227
																									234
																									235	223
																								1	208
																									240
																									240
																									234	231
																						Average fiber length [µm]				222.103				334.36				309.467				308.688				303.25
																						p value (Student's t test)								<0.001				<0.001				<0.001				<0.001
																														***				***				***				***
																						Descriptive statistics (Software: Graphpad)
																						Number of values				39				25				15				32				8
																						Minimum				125.0				240.0				266.0				223.0				267.0
																						25% Percentile				197.0				309.0				278.0				279.8				271.5
																						Median				229.0				339.0				307.0				324.0				290.0
																						75% Percentile				253.0				370.5				333.0				340.3				334.3
																						Maximum				285.0				414.0				376.0				363.0				364.0
																						Range				160.0				174.0				110.0				140.0				97.00
																						Mean				222.1				334.4				309.5				308.7				303.3
																						Std. Deviation				41.91				49.15				33.67				38.62				35.53
																						Std. Error of Mean				6711				9831				8694				6827				12.56
																						Unpaired t test, comparing each sample to wild type (Software: Graphpad)
																						P value								<0.001				<0.001				<0.001				<0.001
																						P value summary								***				***				***				***
																						Significantly different (P < 0.05)?								Yes				Yes				Yes				Yes
																						One- or two-tailed P value?								Two-tailed				Two-tailed				Two-tailed				Two-tailed
																						t, df								t=9.769, df=62				t=7.214, df=52				t=8.971, df=69				t=5.102, df=45
																						How big is the difference?
																						Mean of wild type								222.1				222.1				222.1				222.1
																						Mean of sample								334.4				309.5				308.7				303.3
																						Difference between means ± SEM								112.3 ± 11.49				87.36 ± 12.11				86.58 ± 9.652				81.15 ± 15.91
																						95% confidence interval								89.29 to 135.2				63.06 to 111.7				67.33 to 105.8				49.11 to 113.2
																						R squared (eta squared)								0.6062				0.5002				0.5384				0.3664
																						F test to compare variances
																						F, DFn, Dfd								1.376, 24, 38				1.549, 38, 14				1.178, 38, 31				1.392, 38, 7
																						P value								0.3712				0.3806				0.6448				0.6864
																						P value summary								ns				ns				ns				ns
																						Significantly different (P < 0.05)?								No				No				No				No

## Sheet: Figure_1_Rescue
					Percentage of pupae
genotype	data acquisition	pupae number	number of fibers		0 fiber	4 fibers	5 fibers	6 fibers
Mef2-GAL4/ +	14.12.2016	12	6		0	0	37.5	62.5
		11	6
		10	6
		9	5
		8	6
		7	6
		6	5
		5	5
		4	6
		3	6
		2	5
		1	6
	17.03.2017	5	6
		4	6
		3	5
		2	6
		1	6
	28.03.2017	5	5
		4	6
		3	6
		2	5
		1	6
	17.07.2017	2	5
		1	5
Mef2-GAL4, UAS-Dlg5-GFP/ +	14.06.2016	1	6		0	7.14	35.71	57.14
		2	6
	13.07.2016	4	5
		3	6
		2	6
		1	5
	11.12.2016	10	5
		9	6
		8	6
		7	4
		6	5
		5	6
		3	5
		1	6
Dlg5-IR/ +; Mef2-GAL4/ +	17.12.2016	8	0		100	0	0	0
	females	7	0
		6	0
		5	0
		4	0
		3	0
		2	0
		1	0
	17.12.2016	1	0
	males	2	0
		3	0
		4	0
		5	0
		6	0
		8	0
	17.07.2017	4	0
		3	0
		2	0
		1	0
Dlg5-IR/ +; Mef2-GAL4, UAS-GMA-GFP/ +	22.10.2018	1	0		100	0	0	0
		2	0
		3	0
		4	0
	07.02.2019	1	0
		2	0
		3	0
		4	0
Dlg5-IR/ +; Mef2-GAL4, UAS-Dlg5-GFP/ +	14.12.2016	9	5		0	0	50	50
		8	6
		7	5
		6	5
		5	5
		4	6
		3	6
		2	6
		1	5
	17.12.2016	1	6
		7	6
		6	5
		5	6
		4	6
		3	5
		2	6
	16.12.2016	1	5
		12	5
		11	6
		10	5
		9	6
		8	6
		7	5
		6	5
		5	6
		4	5
		3	5
		2	6

## Sheet: Figure_1_supp_flighttest
Time point: 0-3 days
Mef2-GAL4	wild type					Dlg5-IR-1			Dlg5-IR-2				Dlg5-IR-3				Slmap-IR-1			Slmap-IR-2
	Experiment 1	Experiment 2	Experiment 3	Experiment 4	Mean	Experiment 1	Experiment 2	Mean	Experiment 1	Experiment 2	Experiment 3	Mean	Experiment 1	Experiment 2	Experiment 3	Mean	Experiment 1	Experiment 2	Mean	Experiment 1	Experiment 2	Mean
% of flies in zone1 (lowest)	0	0	0	0	0	100	100	100	100	100	100	100	100	100	100	100	100	96	98	100	100	100
% of flies in zone2	0	0	4.16667	0	1.04167	0	0	0	0	0	0	0	0	0	0	0	0	0	0	0	0	0
% of flies in zone3	0	0	0	0	0	0	0	0	0	0	0	0	0	0	0	0	0	0	0	0	0	0
% of flies in zone4	4	8.10811	16.6667	0	7.19369	0	0	0	0	0	0	0	0	0	0	0	0	2	1	0	0	0
% of flies in zone5 (highest)	96	91.8919	79.1667	100	91.7646	0	0	0	0	0	0	0	0	0	0	0	0	2	1	0	0	0
Total number of flies					161			100				101				117			100			104
Independent experiment days					3			2				3				3			2			2

## Sheet: Figure3_massspec
Gene name	Protein name	Fold change (Log2)	t-test p value (-Log10)	Mef2-GAL4 X wt, sample 1	Mef2-GAL4 X wt, sample 2	Mef2-GAL4 X wt, sample 3	Mef2-GAL4 X wt, sample 4	Mef2-GAL4 X UAS-Dlg5-GFP, sample 1	Mef2-GAL4 X UAS-Dlg5-GFP, sample 2	Mef2-GAL4 X UAS-Dlg5-GFP, sample 3	Mef2-GAL4 X UAS-Dlg5-GFP, sample 4	Peptides	Razor + unique peptides	Unique peptides	Sequence coverage [%]	Sequence length	Average molecular mass
Dlg5	Dlg5, isoform D;CG6509, isoform A;CG6509, isoform C	15.4396	8.60988	18.7249	21.7757	18.7662	18.4892	33.0447	32.988	32.8837	33.2711	125	125	125	68.7	1915	209735
Hsc70-2	Heat shock 70 kDa protein cognate 2	7.59827	4.34654	NaN	NaN	NaN	NaN	24.0164	25.0509	24.5726	22.4988	8	3	3	13.7	633	69722.1
mus312	GH15104p2;Mutagen-sensitive 312, isoform E;Structure-specific endonuclease subunit SLX4	6.0246	4.2623	NaN	NaN	NaN	NaN	22.356	22.8482	23.4758	23.0931	1	1	1	2.1	1145	128216
RpS6	40S ribosomal protein S6	5.91076	3.76691	21.6979	20.8337	18.1833	18.9524	22.1848	22.7186	22.453	21.6753	17	2	2	49.8	217	24696.1
CG2812	CG2812	5.50823	4.56711	16.1381	16.8021	16.4023	16.5748	22.6169	23.8388	21.601	22.3093	6	6	6	21	348	38787.5
Yippee	Protein yippee-like;Protein yippee	5.29895	5.87429	NaN	17.0424	17.5831	16.466	21.2423	21.8801	20.93	21.4508	3	3	3	26.4	115.5	13211.8
bam	Protein bag-of-marbles	5.16856	4.75379	NaN	NaN	NaN	NaN	21.7496	22.6288	21.6024	21.3065	2	2	2	6.6	442	50275
krz	Kurtz	4.93797	2.88851	18.6342	NaN	NaN	NaN	22.3108	23.0299	22.3388	19.7045	8	8	8	20	470	51237
Cpr47Eg	Cuticular protein 47Eg	4.6241	3.16735	22.8846	21.3664	20.2886	21.9773	24.8781	23.3174	23.6369	22.6854	2	2	2	19.7	117	12680.2
CG32603	CG32603	4.6203	1.70854	21.325	NaN	16.5885	16.9014	24.5011	18.9802	22.824	19.4252	7	7	7	52.5	345	34908.9
CG12512-RA	CG12512	4.51722	4.2493	19.1037	19.0306	19.413	19.6981	20.1162	20.244	19.7085	19.701	3	3	3	6.6	593	65201.9
lectin-28C	Lectin type C	4.43171	2.92674	22.3751	20.7964	19.2219	19.5111	24.0991	25.5914	23.6233	23.2197	8	8	8	33.2	265	29930.2
CG3295	CG3295	4.06274	1.40959	19.5315	20.5512	NaN	NaN	22.0504	22.2572	22.4071	NaN	4	4	4	9.3	432	49189.1
homer	Homer;Homer, isoform B;Homer, isoform F;Homer, isoform G;Homer, isoform E	4.03826	1.89126	19.2592	18.1908	NaN	NaN	21.6045	23.9383	21.559	19.2901	7	7	7	26.1	397	43008.2
Pli	Pellino, isoform B;Protein pellino	3.78223	2.79468	18.2385	17.6875	NaN	NaN	22.1957	22.7543	21.9676	21.8709	6	6	6	18.6	424	46770.1
CG6617	CG6617	3.50973	4.33625	19.0045	21.2289	21.7279	21.3988	24.5884	24.8049	24.6114	24.4392	12	12	12	69.3	225	25996.7
Sgs8	Salivary glue protein Sgs-8	3.47532	0.884186	27.2347	26.0557	23.3672	NaN	25.5797	26.9701	24.8304	23.6865	1	1	1	14.7	75	7917.54
Sgs5	Salivary glue protein Sgs-5	3.41502	2.09924	23.0693	21.7151	19.6871	19.7851	22.3813	23.1774	22.7794	22.1649	3	3	3	20.2	163	18820.8
CG7611	CG7611, isoform B;WD repeat-containing protein 26 homolog	3.24464	5.52252	23.6565	24.824	24.1359	24.1008	26.1548	26.4616	26.4943	26.515	14	14	14	31.9	630	69616.9
Ppn	Papilin	3.23255	2.11586	22.6865	19.258	18.9506	19.1738	23.5314	22.1475	21.5709	19.7442	15	15	15	6.3	2808.5	303040
Myo31DF	Myosin 31DF, isoform C;Myosin-IA	3.21353	3.13963	20.7486	20.234	21.2451	20.2609	22.5146	23.2386	23.5054	23.0592	14	14	14	16.6	1011	117095
RanBPM	Ran-binding proteins 9/10 homolog	3.10926	3.9817	21.8061	23.3574	22.4471	22.5182	24.9989	25.4641	25.0227	25.3265	14	14	1	39.3	598	66420.4
Slmap	Slmap, isoform A	3.03017	3.11801	20.8182	20.2723	20.3514	21.4546	24.4456	25.2999	24.195	24.45	16	16	16	20.8	897	100929
CG1733	CG32633, isoform A	2.99874	1.74017	18.6236	19.3754	19.8915	18.1779	21.7018	20.4963	20.3276	19.9741	10	10	10	52.3	285	30960.6
CG9140	CG9140, isoform A	2.97594	1.53722	NaN	NaN	18.371	NaN	18.6138	19.4757	20.168	19.5123	2	2	2	7.2	474	51830.7
nmd	No mitochondrial derivative, isoform B;GH08677p	2.90144	1.22141	18.8448	19.0928	19.4198	18.9283	20.4483	19.9573	21.0268	19.4088	3	3	3	13.1	329	36989.7
Fbp1	Fat-body protein 1	2.88256	0.909516	21.7691	18.3278	NaN	NaN	21.0994	21.4419	21.0403	NaN	89	1	1	72	997	116223
Fgop2	Fibroblast growth factor receptor 1 oncogene partner 2	2.8687	1.13902	NaN	NaN	NaN	NaN	20.4842	20.8748	21.2093	NaN	3	3	3	10.5	315	35149.8
CG4815	CG4815	2.84135	1.53612	NaN	19.8528	18.3978	19.757	18.6699	21.4428	NaN	19.7717	2	2	2	7.5	265	30080.1
CG8184	CG8184, isoform G;CG8184, isoform E;CG8184, isoform F;CG8184, isoform C;CG8184, isoform B;CG8184, isoform D;CG8184, isoform H	2.81862	1.09718	NaN	NaN	20.5969	NaN	20.896	21.1284	21.2091	17.9612	3	3	3	0.9	5145	556773
Lcp65Ab1	Larval cuticle protein 5	2.81564	3.63374	27.6461	25.8137	25.9953	25.0429	27.8957	26.3617	26.556	27.1071	4	4	4	72.1	104	11266.7
CG4199;EG:22E5.5	CG4199, isoform A;CG4199, isoform B	2.78394	3.91515	18.3283	NaN	NaN	NaN	18.4244	18.2649	18.9422	NaN	2	2	2	4.3	572.5	62892.2
CG9468	CG9468	2.76832	1.6027	NaN	19.2475	18.7624	NaN	20.5231	19.869	21.0326	19.5633	4	4	4	6.2	1007	114947
Pka-R1	cAMP-dependent protein kinase R1, isoform X;cAMP-dependent protein kinase R1, isoform Z;FI18174p1;cAMP-dependent protein kinase R1, isoform AA;cAMP-dependent protein kinase R1, isoform V;cAMP-dependent protein kinase R1, isoform O;cAMP-dependent protein kinase type I regulatory subunit	2.76247	4.29669	20.098	NaN	18.9931	19.5248	21.6954	22.3573	22.2882	21.6172	4	4	4	14.8	321.5	35615.4
Pax	Paxillin, isoform D	2.76226	3.3251	20.1463	18.4399	18.5004	18.0912	20.5144	21.066	20.7896	19.5632	3	1	1	25.9	197	22428.4
CG12304-RB;CG12304	CG12304, isoform B;Probable aminoacyl tRNA synthase complex-interacting multifunctional protein 2	2.75363	1.44877	20.2481	19.5054	19.9501	NaN	19.9729	20.8996	20.2632	20.5831	3	3	3	11	317.5	35087.7
alphaTub85E	Tubulin alpha-2 chain	2.75019	2.93443	21.5923	20.82	20.6817	20.4811	22.7291	22.9856	23.0167	23.0123	19	4	4	47.9	449	49966.6
Smg5	LD36341p	2.74866	2.20943	19.3615	19.487	19.8841	19.6162	21.1648	21.1219	21.1325	20.3795	3	3	3	2.5	1177	135314
CG31086	CG31086	2.72332	2.41342	NaN	NaN	NaN	NaN	18.5238	19.6665	19.1621	19.2627	1	1	1	9.5	148	16220.1
CG6564	CG30101	2.65173	3.70142	27.202	27.1479	25.028	26.106	26.4506	25.9231	25.1456	25.326	27	27	27	57.3	328	38134.8
mgl	Megalin, isoform A	2.64321	2.32327	21.5633	23.8335	22.4232	21.8679	23.5237	24.3042	22.6331	22.4818	2	2	2	0.5	4769	530166
mts	Microtubule star, isoform B;Serine/threonine-protein phosphatase PP2A	2.64258	2.43241	19.7113	19.4546	19.1298	20.5024	20.5125	20.9351	20.6086	20.0319	3	3	3	16.2	309	35468.9
Cpr47Eb	Cuticular protein 47Eb	2.61813	1.67614	NaN	18.7041	17.4201	17.5908	22.1026	19.9411	19.1488	19.052	2	2	2	16.4	214	23087.9
Lcp3	Larval cuticle protein 3	2.61687	4.2571	26.8425	25.4641	25.358	23.9471	26.9443	26.6306	26.8945	25.8984	4	4	4	53.6	112	11857.5
CG13376	CG13376, isoform C;CG13376, isoform B;CG13376, isoform D	2.6068	1.32491	23.2719	22.0176	19.8403	22.9435	21.6257	19.3885	20.2047	NaN	2	2	2	38.3	200	16824.8
CG10126;CG10126-RB	CG10126, isoform A;CG10126, isoform B	2.58602	1.024	20.2232	19.9076	20.1415	20.0679	20.3165	20.6101	20.6526	20.4535	4	4	4	22.8	221	25137.8
CG2789	CG2789	2.55717	0.772564	21.001	21.329	21.489	21.498	22.1303	22.4362	22.9212	22.6537	1	1	1	9.2	185	20124.3
CG3262	CG3262, isoform F;CG3262, isoform D	2.55385	1.59008	18.3644	18.189	NaN	NaN	19.0314	19.7609	18.8335	NaN	1	1	1	9.2	250	27525
CG3987	CG3987	2.49443	2.28805	18.9732	19.6391	19.5799	NaN	18.7344	20.4368	20.8532	20.814	1	1	1	4	404	46060.6
Ppat-Dpck	Bifunctional phosphopantetheine adenylyltransferase-Dephospho-CoA kinase	2.43955	1.16349	18.2924	17.5016	17.2386	NaN	18.778	19.3373	19.8219	NaN	1	1	1	2.5	518	57641.2
CG12164	CG12164	2.41949	2.35253	21.4935	17.8401	17.6238	18.3048	19.7205	18.4601	18.8793	18.5398	2	2	2	10.3	329	40875
Reg-2	Rhythmically expressed gene 2 protein	2.40835	2.33084	20.6208	19.6546	19.8068	19.922	20.7299	22.9421	22.2149	20.9556	4	4	4	15	260	30113.3
GckIII	FI20177p1	2.39813	1.28053	NaN	17.1467	NaN	NaN	17.9123	19.4558	19.671	NaN	1	1	1	1.9	642	69933.4
Fim	FI20019p1;Fimbrin;FI19014p1	2.38736	2.22784	18.9466	NaN	18.6561	17.8968	18.9601	19.1985	20.2812	18.7596	2	2	2	4.1	640	71914.3
Mur89F	Mucin related 89F	2.37158	2.21226	25.4966	24.1705	22.6977	22.446	24.4029	23.4586	22.0495	22.7192	7	7	7	5.5	2112	219549
Sgs7	Salivary glue protein Sgs-7	2.33403	1.33654	25.3152	23.296	20.1684	19.4823	24.4458	23.9677	23.3468	21.8144	1	1	1	27	74	7919.56
CG17078;CG17078-RA	CG17078, isoform D;CG17078, isoform C;CG17078, isoform B	2.33383	1.99885	NaN	NaN	NaN	NaN	17.4063	18.5104	19.1246	NaN	1	1	1	2.1	608	67348.5
Tim8	Tim8, isoform B;Mitochondrial import inner membrane translocase subunit Tim8	2.33303	2.13114	20.005	18.2678	16.2424	14.7153	17.2263	17.7229	17.5582	18.4813	4	4	4	61.4	88	10062.4
CG5377-RA	CG5377	2.32984	4.18443	19.7153	18.7647	19.6651	18.7654	20.4449	20.7117	20.9725	20.6333	2	2	2	11.9	278	31703.4
CG11382-RB	CG11382, isoform B	2.31793	0.898812	21.665	NaN	NaN	NaN	21.8373	NaN	NaN	NaN	3	3	3	10.9	505	52441.7
CG3984	CG3984	2.29463	2.28829	18.1463	15.7661	17.1137	16.4128	18.7417	18.8267	19.0964	17.7287	1	1	1	2.2	537	56955.3
l(3)mbn	Protein lethal(3)malignant blood neoplasm 1	2.29361	1.26718	NaN	NaN	NaN	NaN	19.9638	18.3279	18.6453	NaN	1	1	1	6.4	653	67144.4
CG9915	CG9915, isoform B	2.29328	4.62328	24.0805	25.3656	25.6141	25.9585	26.5445	26.5703	26.3408	26.2957	31	31	31	32.3	820	90576
CG4998	CG4998, isoform A;CG4998, isoform B	2.29072	3.0595	22.5296	22.5889	21.9972	20.4156	22.0121	21.3189	20.8081	21.8629	4	4	4	8.3	1038	111570
CG4860	CG4860	2.27633	1.61233	18.375	NaN	NaN	18.7931	18.862	18.6045	19.2043	18.0906	2	2	2	5.1	415	44880.3
CG8230	Dymeclin	2.26788	1.52442	19.6193	19.9116	NaN	NaN	19.9642	19.7491	NaN	18.111	3	3	3	4.3	699	79124.9
PIP4K	Phosphatidylinositol 5-phosphate 4-kinase, isoform A	2.2376	5.33512	22.8771	23.6244	23.5222	23.9683	25.568	25.6097	25.9063	25.7415	15	15	15	40.6	404	47032.7
CG14445-RB;CG14445	CG14445, isoform B;CG14445, isoform A;CG14445, isoform D;CG14445, isoform C	2.23246	2.827	18.5937	17.8691	17.5721	17.0287	19.9884	19.5468	19.7684	18.3027	2	2	2	6.6	346	38228.3
CG13638	CG31357	2.22379	4.34843	20.8966	21.2391	21.1765	21.4289	23.0592	23.2262	23.3348	23.3407	11	11	11	31	394	45375.3
His3.3A	Histone H3;Histone H3.3	2.22328	0.557075	NaN	25.7565	25.2782	25.8509	24.9112	24.5154	25.2376	22.1973	9	1	1	55.9	136	15327.9
Adk1	AT17975p;Adenylate kinase-1, isoform B	2.22048	3.49578	22.3231	21.6755	20.6548	20.2672	22.7992	23.3085	23.1797	22.8358	6	6	6	43.3	215	23601.5
l(2)01289	L(2)01289 long form;Lethal (2) 01289, isoform F;Lethal (2) 01289, isoform J	2.19405	1.54436	26.1954	25.3236	25.501	24.8277	26.5738	26.6959	26.4632	26.8049	27	27	1	27.7	1703	196580
GstZ1	Probable maleylacetoacetate isomerase 1	2.18323	1.03896	19.335	18.6807	18.4636	18.7779	20.7008	19.2731	19.5631	NaN	1	1	1	4.9	246	27890.2
Pp1-13C;Pp1-87B	Serine/threonine-protein phosphatase alpha-3 isoform;Serine/threonine-protein phosphatase alpha-2 isoform	2.10879	0.749561	20.6619	19.7083	21.1304	19.7912	NaN	20.6519	20.9063	NaN	3	1	1	9.6	302	34549.9
Peritrophin-A	LD20793p	2.10587	0.892101	22.0033	20.216	19.4459	19.8685	20.8963	18.9411	19.175	19.3662	4	4	4	21.7	230	25491.6
ImpE2	20-hydroxyecdysone protein	2.10374	0.716291	20.7315	20.4344	18.1855	18.3728	23.5519	17.5264	18.4088	19.1095	3	3	3	14.6	466	49809.3
Cpr50Ca	Cuticular protein 50Ca	2.10113	1.07714	26.5637	23.931	21.2663	24.358	24.1441	21.3619	23.0535	23.467	15	15	15	29.8	815	90946
CG6933;CG6933-RA;CG6933-RC	CG6933, isoform B;CG6933, isoform A;CG6933, isoform C	2.09594	0.549203	NaN	18.4442	NaN	NaN	NaN	NaN	21.2685	23.4074	5	5	5	28.2	351	37343.2
Cka	Connector of kinase to AP-1, isoform G;Connector of kinase to AP-1, isoform A;Connector of kinase to AP-1, isoform F;Connector of kinase to AP-1, isoform E	2.07301	3.53915	21.529	21.7418	21.3385	22.09	24.5753	23.7154	23.6341	24.1623	7	7	7	15.9	738.5	78933.5
Cpr60D	Cuticular protein 60D	2.06995	1.54271	22.8762	19.6943	18.6176	18.1534	21.9882	19.5937	21.5824	19.0989	3	3	3	59.1	93	10245.5
cactin	Cactin	2.06264	5.22194	23.4373	24.6069	24.9046	24.9917	24.7831	24.5394	24.6775	24.239	23	23	23	29.6	720	86556.4
CG1640	CG1640, isoform A;AT04676p	2.062	3.09212	21.3573	21.8923	21.9168	21.7513	22.5161	23.0568	23.1596	23.221	9	9	9	20.4	571.5	63587.6
koi	CG3287, isoform B	2.06184	1.25038	19.8881	19.0503	18.9077	18.6569	18.6815	18.4825	18.2713	NaN	2	2	2	8.5	449	51755
CG5045	ATP-dependent Clp protease proteolytic subunit	2.06026	0.857848	NaN	NaN	19.5533	NaN	19.795	19.7676	19.7989	NaN	1	1	1	12.3	253	27573.8
CG32121	CG32121	2.04947	0.659127	16.9298	12.1491	NaN	NaN	NaN	12.1766	NaN	NaN	19	19	19	45.7	648	69570.2
CG16886;BG:DS00180.2	CG16886, isoform B;CG16886, isoform A	2.04692	3.70574	26.5348	26.3942	25.1235	25.8604	25.0973	24.8039	24.615	25.0402	17	17	17	42.5	365.5	42079.5
prc	Pericardin	2.03064	3.47959	20.8522	NaN	NaN	NaN	19.0526	18.2331	18.7817	18.4017	3	3	3	3.7	1713	163500
CG32249-RA	CG32249	2.01582	2.51419	21.2258	20.4499	20.3349	17.7019	20.7596	19.316	20.2701	19.4234	3	3	3	47.1	242	25580.4
Ccp84Ab	Ccp84Ab	2.00642	0.277903	25.9863	27.0751	26.1727	25.5942	25.289	24.0318	23.9921	25.2857	15	2	0	55.2	221	23068.1
CG8927	CG8927, isoform A;CG8927, isoform B	1.9845	1.36867	23.5264	21.4895	20.0473	19.5617	21.285	21.336	19.9216	20.0502	5	5	5	26.8	325.5	36374.8
CG3226	CG3226	1.96286	0.942734	21.6751	19.4891	NaN	NaN	20.7555	20.0574	19.7163	NaN	1	1	1	8.7	230	25783.3
grsm	Granny smith, isoform D;GH27579p	1.96079	4.35309	23.1622	23.3668	23.1273	23.2365	24.876	25.0452	25.1702	25.0029	12	12	12	27.6	545.5	58690.6
Nipsnap	Nipsnap, isoform E;Protein NipSnap	1.95855	3.04498	23.473	23.4796	23.5821	23.3753	23.7178	24.4531	24.866	24.1971	7	7	7	40.7	273	31965.4
br	Broad, isoform J;Broad, isoform O;Broad, isoform M;Broad, isoform C;Broad, isoform P;Broad-complex core protein isoforms 1/2/3/4/5;Broad-complex core protein isoform 6	1.95551	1.10619	NaN	NaN	18.6292	NaN	19.6924	19.0974	19.4084	18.9591	2	2	2	8.6	702	74145.2
CG10359	CG10359, isoform G;CG10359, isoform E	1.90509	2.74869	24.9266	22.7241	22.3589	21.6668	23.8644	23.0633	23.2446	22.3974	8	8	8	25.3	472	52644.4
Lcp4	Larval cuticle protein 4	1.89485	2.85446	26.1482	25.8196	25.3054	23.7936	27.2956	26.6303	26.7745	26.1758	3	3	3	53.6	112	11979.5
CG5261	AT21758p;CG5261, isoform A;CG5261, isoform E;CG5261, isoform D;CG5261, isoform C	1.88623	4.3028	29.1104	30.1488	30.3051	30.5478	29.3472	28.8205	29.4454	29.5605	36	36	36	53.1	489	51724.5
CG10912	CG10912	1.88538	0.703138	17.7116	17.4683	17.2729	15.4048	20.7267	19.5144	21.0352	17.4037	2	2	2	7.4	271	29692.4
bgm-RA;bgm	Bubblegum, isoform C;Very long-chain-fatty-acid--CoA ligase bubblegum	1.87327	2.56926	19.7216	19.2884	18.5451	19.7101	22.2449	21.5914	22.0616	21.3546	5	5	5	11.6	666	73610.6
FeCh	Ferrochelatase, mitochondrial	1.87181	0.627469	21.2659	21.4571	21.2249	20.5512	21.833	22.183	22.2347	21.621	4	4	4	23.5	332.5	37690.9
CG18431-RA	CG18431	1.85529	3.01128	24.3303	23.0542	22.1649	20.3606	22.2868	22.4526	21.675	22.2846	6	6	6	42.3	194	21663.6
CG8446-RD	CG8446, isoform D	1.85104	1.87457	17.6715	18.0726	NaN	NaN	18.3882	18.0506	18.7407	NaN	1	1	1	21.4	70	7405.55
P5CDh1	Delta-1-Pyrroline-5-carboxylate dehydrogenase 1, isoform A	1.8437	2.11823	20.7921	20.7528	20.7768	20.8187	22.4037	21.7949	23.5081	22.5015	6	6	6	12	574	63667
CG3918	CG3918	1.84127	6.38038	22.8449	23.5836	23.4614	23.1986	22.8659	22.7985	22.9834	22.8312	5	5	5	18.4	321	35246.6
GlyS	Glycogen [starch] synthase	1.83603	3.21936	20.2459	20.0373	20.0474	20.3433	21.2087	21.8556	21.8861	21.3473	5	5	5	8.4	699	80493.8
CG15735	Protein LSM12 homolog A	1.82337	1.18338	17.7241	NaN	NaN	NaN	18.5056	18.7015	19.5766	NaN	1	1	1	6	217	23745.7
Eig71Eb	Ecdysone-induced gene 71Eb, isoform A	1.81726	2.33332	21.9711	19.9459	18.854	18.9542	19.9385	20.9096	19.7622	19.287	2	2	2	23.2	95	11121.9
tou	Toutatis, isoform A;Toutatis, isoform E	1.81587	1.47148	20.2145	NaN	NaN	NaN	18.3761	18.316	18.0759	NaN	1	1	1	0.7	3065	329408
Lcp9	Larval cuticle protein 9	1.8119	1.64309	21.5729	20.1125	20.3852	19.9748	23.1882	22.3874	20.691	21.2652	2	2	2	43.5	92	10236.6
CG7298	CG7298	1.80903	0.640511	17.6059	16.6665	NaN	NaN	17.663	15.4291	20.715	20.6557	6	6	6	29	369	39076.9
CG18294	CG12519, isoform A;CG18294	1.80116	0.450041	25.7421	21.8251	20.5618	19.4023	22.5979	21.1778	22.7086	20.4201	2	2	2	26	136	13176.2
Sgs4	Salivary glue protein Sgs-4	1.778	0.999975	20.9035	17.2575	NaN	NaN	20.0645	18.218	18.2314	NaN	1	1	1	4.4	297	32309.4
Papss	LD25351p;PAPS synthetase, isoform E;PAPS synthetase, isoform D	1.77519	0.591183	19.3551	19.6084	20.1589	19.1235	19.7079	19.5232	19.7935	NaN	2	2	2	6.2	630	71334.3
CG5149	CG5149	1.77122	1.34892	18.531	NaN	NaN	NaN	18.4894	18.9312	18.7342	NaN	3	3	3	7.4	448	51434
CkIalpha	Casein kinase ialpha, isoform D;Casein kinase I isoform alpha	1.76669	3.78954	21.7874	20.1739	20.9245	20.2005	22.5492	22.4852	22.0187	21.7915	5	5	5	18.7	337	39535
Rpb11	DNA-directed RNA polymerase II subunit RPB11	1.76617	1.21583	21.9877	22.0394	19.7836	19.5742	20.6271	19.6619	19.7595	19.971	2	2	2	30.8	117	13385.4
CG4151	CG4151, isoform A	1.75649	3.33411	27.7099	26.3559	25.8715	26.1051	26.1665	26.7908	26.6902	26.2854	14	14	14	65.9	182	20536
mRpL4	LD33485p	1.75519	0.776684	19.2956	18.9322	18.6779	NaN	19.124	19.3311	19.2669	NaN	1	1	1	5.4	296	32830.6
Hml	Hemolectin, isoform B;Hemolectin, isoform A	1.74406	3.95327	25.4075	24.3097	23.9505	23.3142	24.6091	24.9171	24.7511	24.2037	47	47	47	15.5	3842.5	426201
CG16758;CG16758-RF	Purine nucleoside phosphorylase;CG16758, isoform B;CG16758, isoform G;CG16758, isoform H	1.7434	1.27592	NaN	18.8473	19.1733	18.5874	19.5421	22.0639	22.0707	19.5814	3	3	3	15.5	341	36931.2
Lcp2;Lcp1	Larval cuticle protein 2;Larval cuticle protein 1	1.73982	1.80049	23.3515	21.0706	21.3558	18.8478	23.8398	24.0215	23.9874	22.0324	3	3	3	55.6	128	13704.7
MAPk-Ak2	LD26767p;MAP kinase-activated protein kinase 2	1.73799	0.686225	22.1798	20.1819	20.3982	19.9122	20.666	21.0735	20.7982	21.6883	3	3	3	13.9	359	41401.4
CG16865	CG16865, isoform B;UPF0428 protein CG16865	1.7366	4.2194	21.4437	23.3615	23.433	23.8078	23.1094	22.5648	22.9484	22.9937	10	10	10	54.7	247	27695.5
CG11905	CG11905, isoform C	1.73422	0.898127	21.4876	18.7939	NaN	NaN	19.6615	17.874	18.5862	NaN	2	2	2	8.3	315	33144.8
Cpr65Ax1	Cuticular protein 65Ax1	1.7228	2.31815	22.3159	21.2746	20.1944	20.5639	22.8119	21.3546	21.7535	21.4244	2	2	2	28.4	102	10672.8
Gs2	Glutamine synthetase 2 cytoplasmic	1.71314	5.08739	23.8171	23.213	23.2073	23.1402	24.8069	24.6623	24.767	25.0681	15	15	1	49.9	369	41285.3
CG3595;sqh	CG3595;Myosin regulatory light chain sqh	1.7056	0.735506	20.5944	20.3699	20.1415	18.3066	20.8814	21.0905	21.3813	NaN	3	3	3	28.2	174	19954.4
CaMKII	Calcium/calmodulin-dependent protein kinase II, isoform C;Calcium/calmodulin-dependent protein kinase II, isoform E;Calcium/calmodulin-dependent protein kinase II, isoform I;Calcium/calmodulin-dependent protein kinase II, isoform J;Calcium/calmodulin-dependent protein kinase type II alpha chain;Calcium/calmodulin-dependent protein kinase II, isoform K;Calcium/calmodulin-dependent protein kinase I…	1.67851	5.25161	23.2107	23.6664	23.392	23.4579	24.4013	24.7893	24.7077	24.3796	11	11	11	30.8	509	57569.3
CG4115	CG4115	1.65881	1.33488	22.7912	21.1551	20.4084	20.5623	21.5039	18.7732	21.1045	19.4587	5	5	5	29.5	220	25331.6
CG17549	CG17549, isoform B;CG17549, isoform A	1.65189	1.14303	22.4996	20.1629	19.9386	19.591	20.941	20.3551	20.5187	19.8949	3	3	3	16.4	274.5	27729
Pax	Paxillin, isoform B;FI11475p;MIP15702p;LD06038p;Paxillin, isoform F	1.63474	1.50624	20.3918	18.7827	17.6069	17.9111	21.0534	21.7513	21.5002	19.4093	4	4	2	13.5	563	62686.5
CG17593-RA	CG17593, isoform A	1.63266	0.872163	18.8264	19.2993	18.4412	17.3875	22.2571	18.756	18.8059	21.4703	3	3	3	7.8	476	54154.1
sm	FI03683p;AT01055p;Smooth, isoform G	1.63238	0.960008	NaN	18.995	18.6998	19.2378	18.3083	18.9845	18.1178	NaN	6	1	1	24	404	43986.2
CG3364	CG30159, isoform A	1.63204	0.631102	19.6104	20.6151	20.1745	20.8959	20.488	21.4164	21.8775	21.6786	3	3	3	13	239	27611.3
laccase2	CG42345, isoform F;CG42345, isoform A;CG42345, isoform D;CG42345, isoform E	1.63065	1.52888	22.3128	21.301	17.4997	18.8469	21.1193	20.0139	19.5032	19.5451	1	1	1	1.5	784	86690.3
CG31728	CG31728	1.6305	1.59811	21.174	18.585	NaN	NaN	18.4258	18.3194	18.4777	NaN	4	4	4	8.6	639	68676.5
Sod2	Superoxide dismutase [Mn], mitochondrial	1.62866	3.54589	20.3156	23.4561	23.6842	23.7217	23.6534	24.1357	23.5765	23.4326	5	5	5	30	217	24684.2
CG18067	CG18067	1.62694	1.29745	NaN	19.6795	19.8371	19.681	20.8692	21.0159	20.4799	20.343	2	2	2	18	245	26229.7
CG14984	CG14984, isoform B	1.61915	0.998621	22.8592	22.5468	19.4483	21.6098	22.0527	19.5992	18.8307	18.4463	3	3	3	27.8	115	12089.7
Inos	Inositol-3-phosphate synthase	1.61913	2.2436	20.6317	19.9108	19.8809	NaN	21.7817	22.0022	21.4526	20.3265	3	3	3	7.3	565	62249.5
polo	Serine/threonine-protein kinase polo	1.61656	0.974299	17.922	NaN	NaN	NaN	NaN	18.8317	18.9593	18.4026	3	3	3	5.4	576	66973.5
Cpr78E	Cuticular protein 78E	1.61423	1.02898	23.5431	21.7759	20.6314	19.8402	24.1736	20.9643	21.0044	20.9186	2	2	2	29.9	137	14951.6
Cpr51A	Cuticular protein 51A	1.61249	1.295	27.9233	27.0547	26.0865	25.4608	27.6339	25.3047	24.7633	25.1404	11	11	11	75	144	16434.1
CalpA	Calpain-A, isoform C;Calpain-A	1.60564	0.664911	19.166	19.4327	18.3185	18.7566	20.4738	20.5628	20.4035	19.7935	1	1	1	3.1	828	93962.6
TwdlM	RE40518p	1.60048	1.88089	19.9593	17.3468	17.7008	19.1522	20.2862	19.4786	19.9071	21.5803	5	5	2	29.5	288	28668.8
CG11999	CG11999	1.59727	1.46409	19.8803	19.4468	18.507	18.4918	20.9536	20.8892	19.9385	18.4727	2	2	2	9.3	216	23633.4
CG32138	CG32138, isoform D;Formin-like protein CG32138	1.58417	0.316279	NaN	20.3047	21.6403	21.7134	NaN	21.8006	21.2823	20.5909	2	2	2	3	1169	131477
CG15012	CG15012	1.57899	0.376287	NaN	NaN	NaN	NaN	NaN	NaN	NaN	23.3568	1	1	1	10.5	152	16937.6
pdgy	BcDNA.GH02901	1.57464	2.58052	19.9836	19.3688	20.5984	20.1144	20.4848	21.5142	21.4999	21.0515	3	3	3	7.7	597	65570.1
Myo61F	Myosin-IB	1.5739	0.795673	NaN	NaN	NaN	NaN	19.3101	19.5077	18.9184	NaN	3	3	3	3.5	1035	118990
epsilonCOP	BcDNA.LD29885	1.57365	2.19916	20.6487	20.4188	20.2932	19.6034	22.1628	21.0779	21.9685	20.6383	4	4	4	19	306	34619.1
Tig	Tiggrin, isoform B;Tiggrin	1.54786	1.54437	23.5264	20.8258	20.5249	19.797	22.4224	22.4021	22.7352	21.1983	17	17	17	10.7	2188	257446
ATPsyn-d	ATP synthase subunit d, mitochondrial	1.541	1.76799	24.5354	25.1339	23.8598	24.0231	25.6639	24.8654	24.6987	24.7167	6	6	6	34.8	178	20200.7
Sgs3	Salivary glue protein Sgs-3	1.5347	1.06077	20.66	21.0134	18.0874	18.0821	20.4272	20.7784	21.2786	19.4425	1	1	1	3.9	307	32195.9
e(y)2b	Enhancer of yellow 2b transcription factor	1.52662	0.864649	NaN	25.8422	NaN	NaN	NaN	NaN	NaN	NaN	1	1	1	17.9	95	10828.6
Pak3	Pak3, isoform B;LD10376p	1.52633	0.667452	21.2181	20.633	20.4309	20.1289	20.7399	21.0926	20.9262	20.0872	3	3	3	9.1	487	55177.1
Nup160	Nucleoporin 160kD, isoform B;Nuclear pore complex protein Nup160 homolog	1.52369	0.584769	NaN	17.5327	17.7924	17.3432	17.768	17.86	22.6735	17.7379	1	1	1	0.9	1411	160276
Tequila	Tequila, isoform F;Tequila, isoform G	1.52179	2.24157	21.9713	19.4129	19.0491	18.771	20.2657	20.9008	19.5837	20.986	3	3	3	2.4	2585.5	286511
eIF-2alpha	Eukaryotic translation initiation factor 2alpha, isoform B;Eukaryotic translation initiation factor 2 subunit 1	1.52056	1.93002	22.8473	21.8242	21.5704	21.4617	22.9574	23.4555	23.0477	22.771	9	9	9	37	341	38645.7
CG13358-RB	CG13358	1.51895	0.457201	24.2603	21.4285	NaN	21.2616	21.4204	16.2207	17.8333	20.5634	5	5	5	17.9	301	31730.2
CG11563-RA	CG11563	1.5158	1.88015	NaN	NaN	NaN	17.6091	18.9501	18.9025	19.0128	17.9122	1	1	1	5.8	207	24753.6
CkIIalpha	Casein kinase IIalpha, isoform C;Casein kinase II subunit alpha	1.51287	2.5111	26.1118	26.8553	26.8385	26.9215	26.5003	26.8209	26.4567	26.9489	15	15	15	58	336	39959.7
CG11370	CG11370, isoform B;CG11370, isoform A	1.49875	1.70916	21.5323	20.206	16.9711	17.2038	20.5355	20.7084	20.5583	18.9853	4	4	4	28.7	343.5	35628.6
EG:BACR42I17.7	CG11380, isoform A	1.48998	1.20838	21.726	18.1144	NaN	17.8557	17.7421	18.0293	NaN	NaN	1	1	1	3.7	569	64019.7
CG4164	CG4164	1.48592	2.48125	21.1648	20.8791	20.5813	20.3482	22.4171	22.7216	22.5549	21.5816	5	5	5	17.5	354	40211.7
CG13138	CG13138, isoform B	1.47575	1.05774	20.599	20.7522	18.8714	18.3912	19.7548	18.4269	18.8272	18.6124	4	4	4	8.7	549	63265.5
l(1)G0334	GM13002p;Lethal (1) G0334, isoform C;LD13846p	1.46547	4.87016	26.8411	27.8401	27.8579	27.9685	27.933	27.7281	27.8534	28.0515	21	21	21	58.9	399	43891.9
Lsp1gamma	Larval serum protein 1 gamma chain	1.4618	2.21778	27.9474	26.8138	26.6771	25.8956	27.8281	27.9089	28.7171	28.1351	46	46	43	54	772	93408.2
BEST:CK01296	CG5885	1.46137	0.386043	23.1503	23.4708	23.7424	24.0365	24.0411	24.1219	24.383	25.6376	1	1	1	10	190	21635.9
CG8728-RA	CG8728	1.45678	0.674955	19.2325	19.4581	19.5201	19.7293	19.7595	19.8097	20.6512	19.7633	2	2	2	5	556	61050.1
CG17597	CG17597, isoform A	1.45677	4.47309	20.3551	19.2482	19.3693	19.2523	20.5874	21.0639	21.0087	20.9694	10	2	2	37.8	407	43904.2
Tim13	CG34132	1.44559	0.842921	19.6058	NaN	NaN	NaN	17.5551	17.6269	NaN	NaN	3	3	3	47.6	84	9671.22
CG15322	CG15322, isoform B	1.44144	0.953439	25.2432	24.221	22.3178	23.9955	23.9516	21.8909	22.234	23.0476	8	8	8	17.7	740	79112.4
CG10527	CG10527	1.43776	2.73349	22.8372	21.7446	21.3479	20.6533	23.0269	23.1144	23.6826	22.4962	4	4	4	14.2	296	31556.3
Nplp2	Neuropeptide-like 2, isoform B;Neuropeptide-like 2	1.4092	2.28728	20.9113	20.0437	21.014	19.9655	21.747	21.562	20.9826	20.3897	2	2	2	26.7	86	9411.93
CG32241	CG32241	1.40482	1.0579	21.2929	21.992	19.4632	18.8185	22.0289	19.3418	20.8444	19.271	5	5	5	31.8	415	45017.1
CG10237;CG10237-RC	CG10237, isoform A;CG10237, isoform C;CG10237, isoform B	1.40376	1.03043	NaN	18.7718	18.5802	18.1847	19.0944	19.7185	20.0011	19.3476	2	2	2	6.6	306	35735.4
Cpr66Cb	Cuticular protein 66Cb	1.39776	1.39953	26.8627	25.0846	23.2925	25.5485	25.1607	23.4389	23.3943	23.3382	6	6	5	39.5	162	18857.4
LanB1	Laminin subunit beta-1	1.39367	2.01641	21.8198	20.7045	19.988	19.4068	20.3299	21.2837	21.9597	20.7239	7	7	7	5.4	1788	198333
CG8654-RA	CG8654	1.38314	2.92302	18.8676	19.6163	19.7197	19.8581	19.5101	20.0015	20.1017	19.6196	2	2	2	5.2	502	55498.7
CG7949	MIP18 family protein CG7949	1.38009	1.08338	17.4578	NaN	NaN	NaN	18.7299	18.4521	18.0068	NaN	1	1	1	9	156	17587
dco	Discs overgrown protein kinase	1.37781	1.66794	20.3423	19.9563	20.7817	20.1966	20.9994	21.4541	22.2431	20.6972	5	5	5	23	440	47957.6
CG9231	CG9231, isoform B;UPF0389 protein CG9231	1.3752	3.23329	19.3481	18.7449	18.3807	19.2454	20.8167	20.7321	20.3331	20.0614	3	3	3	28.8	125	14104.4
CG16935	Probable trans-2-enoyl-CoA reductase, mitochondrial	1.37092	3.31475	20.0342	20.2827	20.3395	20.8832	21.5387	21.8251	21.8684	22.1713	5	5	5	17.1	357	39111.4
CG32762	CG32762, isoform A	1.36555	3.6077	26.3094	26.0339	25.8631	26.2368	25.4946	25.7399	25.1472	25.2005	10	10	10	45.5	200	22896.3
Lcp65Ac	Cuticle protein DCP2	1.36206	0.420137	21.7839	NaN	21.2075	NaN	20.8179	19.4101	20.4633	16.9396	2	2	2	37.6	109	11743
Fs(2)Ket	Female sterile (2) ketel, isoform B;Importin subunit beta	1.35847	2.29077	18.1136	17.7697	17.9622	18.4289	18.2682	18.4657	18.4744	18.8836	2	2	2	2.6	884	98695.5
cm	Carmine, isoform A	1.35576	3.69995	27.3664	28.0618	28.1107	28.5824	28.3194	28.1518	28.0589	28.0261	26	26	26	73.5	415	46795.9
LanB2	Laminin B2, isoform B;Laminin subunit gamma-1	1.35442	3.04445	21.5625	20.8766	20.3938	19.8512	21.0818	21.6515	21.752	21.152	9	9	9	7.2	1639	182339
CG9090-RA	CG9090	1.34903	3.03433	19.7536	22.1177	21.977	21.679	23.1969	24.0019	24.0763	23.9177	8	7	7	20.6	374	40553.3
flw	FI18647p1;Flapwing, isoform A;Serine/threonine-protein phosphatase beta isoform	1.34536	1.24404	18.5345	18.9964	NaN	18.8928	19.7085	19.7719	19.2427	20.0132	4	2	2	14.8	330	37740.5
CG8475	CG8475, isoform C;Probable phosphorylase b kinase regulatory subunit beta	1.34162	1.56739	18.5393	18.9054	NaN	18.1229	18.4981	20.2501	19.3687	20.5267	3	3	3	4.6	1093	124864
ubl	Ubiquitin-like protein 5	1.32883	1.31742	NaN	NaN	18.9206	19.0722	NaN	NaN	NaN	17.8128	1	1	1	12.3	73	8570
ABCB7	ABCB7, isoform B;ABCB7, isoform A	1.32654	0.462343	20.1277	20.1287	NaN	NaN	20.1947	21.2969	20.8359	NaN	3	3	3	10	726	78605.1
CG6426	CG6426	1.32349	1.96598	26.2292	24.6566	23.7369	22.6621	24.001	23.6759	23.5182	22.6371	5	5	5	52.2	161	17311.6
alpha-Cat	Catenin alpha	1.32302	0.897085	19.9542	19.1825	NaN	NaN	19.2716	19.27	18.9465	19.2943	1	1	1	2.8	917	102444
CG3108	CG3108	1.3194	0.816219	23.1402	20.6628	20.6446	22.0793	22.9218	20.3349	21.1274	19.9401	10	10	10	10.5	1132	125335
Etf-QO	CG12140	1.31745	2.00593	22.3283	21.6258	21.7271	20.7572	21.859	22.3807	22.7507	22.0559	7	7	7	11.8	604	65988.1
HspB8;CG14207	CG14207, isoform A;CG14207, isoform B;CG14207, isoform C	1.29664	1.99751	26.4889	25.4646	25.4122	25.0618	26.56	26.4601	26.5915	26.3274	10	10	10	66.7	183	20841.6
Neurochondrin	Neurochondrin homolog	1.2897	3.54489	23.1778	23.758	22.917	23.125	24.9054	24.8469	25.1543	24.7734	10	10	10	18.5	723	81629.2
Aps	Aps, isoform A	1.28496	0.573273	19.3386	18.7507	18.9295	19.0162	18.7468	19.122	20.0192	NaN	2	2	2	21.5	177	19879.3
Prx3	Peroxiredoxin 5037	1.28361	1.24246	19.9526	NaN	19.8662	19.2936	21.7612	21.5946	20.851	21.7338	4	4	4	21.4	234	26379.3
CG13890	CG13890	1.27448	2.16983	NaN	18.9856	18.587	18.4404	19.3997	20.5154	20.3225	19.4234	3	3	3	14.1	262	29203.7
CG9393	Metaxin-1 homolog	1.27042	0.947918	NaN	17.3825	17.8121	NaN	18.0362	18.345	18.6331	18.3266	2	2	2	9.2	327	37252.4
p115	SD01505p	1.26852	0.677371	17.233	NaN	NaN	NaN	18.2751	17.7651	17.8546	NaN	1	1	1	2.4	836	92069.3
CG1319	CG1319	1.26558	2.87575	18.7613	18.8031	19.3521	19.9208	19.0836	19.4771	19.5337	20.0263	2	2	2	18.4	152	16406.7
syd	Sunday driver, isoform D;Sunday driver, isoform E;Sunday driver, isoform G;Sunday driver, isoform H;Sunday driver, isoform J;Sunday driver, isoform F;Sunday driver, isoform C;Sunday driver, isoform I;JNK-interacting protein 3	1.26021	0.698692	18.225	19.4927	NaN	NaN	19.2325	19.1176	18.6859	NaN	1	1	1	2.1	1209.5	134652
betaTub85D	Tubulin beta-2 chain	1.25786	1.81315	25.8726	24.5926	24.6406	24.4682	25.8643	26.1919	25.3105	25.0431	21	5	5	49.3	446	49870
obst-A	LD43683p	1.24647	0.947695	20.6055	20.1599	19.5409	19.7127	21.6551	21.5788	22.9313	20.2724	5	5	5	24.1	237	26563.8
CG12264	Probable cysteine desulfurase, mitochondrial	1.24565	1.6203	21.1222	21.4254	21.8097	21.4265	22.3406	23.171	23.5732	21.7811	8	8	8	20.8	462	51074.2
Rpn8	26S proteasome non-ATPase regulatory subunit 7	1.24518	2.21988	22.6558	21.4039	21.6894	21.4217	22.7487	23.4029	23.7167	24.0618	7	7	7	26.3	338	38089.3
CG13321	CG13321	1.23785	2.62781	21.7343	21.7297	21.4879	20.2844	22.59	23.0802	22.924	22.0433	6	6	6	26.6	286	30873.4
Cpr62Bb	Cuticular protein 62Bb, isoform A	1.23001	0.60526	22.7237	21.2618	20.1875	20.0733	20.929	19.072	18.8717	18.5874	3	2	2	24.2	194	21206.5
Glycogenin	Glycogenin, isoform B	1.22652	2.27725	21.2199	20.7	20.655	19.0113	21.7795	22.2062	21.8463	21.9054	3	3	3	11.1	333	37775.7
CG6412	Elongation factor Ts, mitochondrial	1.22535	1.51906	19.1152	18.8478	19.049	18.6214	19.125	20.0535	20.4052	20.202	1	1	1	7.2	318	35412
CkIIbeta	Casein kinase II beta subunit, isoform J;Casein kinase II beta subunit, isoform C;Casein kinase II beta subunit, isoform I;Casein kinase II beta subunit, isoform K;Casein kinase II subunit beta	1.22515	1.18077	22.8048	22.5793	21.974	22.3195	23.3758	22.8782	22.5345	21.0316	4	4	4	21	233	26814.1
l(2)04524	Probable methylcrotonoyl-CoA carboxylase beta chain, mitochondrial	1.21146	4.77233	19.4592	20.3409	21.1197	20.6499	21.7211	21.6085	21.6279	21.6702	7	7	7	19.4	578	62648.5
Ady43A	Ady43A	1.21064	1.78417	17.6001	18.5206	18.3067	17.8607	18.3998	19.0861	18.9275	18.6539	2	2	2	11.2	366	40364.9
car	Carnation, isoform B;Carnation, isoform C;Vacuolar protein sorting-associated protein 33A	1.20952	1.0084	17.5003	NaN	17.8368	17.846	18.2381	18.4164	18.5385	18.9555	1	1	1	2.4	617	68766.2
CG5390-RA	CG5390, isoform A	1.20822	1.36009	20.8159	19.2543	19.1208	18.6966	20.9522	20.5597	19.6259	18.8516	4	4	4	11.6	406	44819.8
Jafrac1	Thioredoxin peroxidase 1, isoform C;Peroxiredoxin 1	1.20745	4.45862	25.0459	24.9171	24.8439	24.7404	25.8394	25.8961	25.8455	25.528	11	11	11	57.2	194	21737.9
SdhB	Succinate dehydrogenase [ubiquinone] iron-sulfur subunit, mitochondrial	1.20601	3.15932	21.3853	22.0348	22.2848	22.4496	22.7202	22.2896	22.4361	22.7726	9	9	9	29.3	297	33741
CG3626-RA	CG3626	1.20231	0.807973	18.5674	18.6203	NaN	NaN	18.8097	18.812	20.7193	NaN	2	2	2	3.7	939	106330
ImpE1	Ecdysone-inducible gene E1, isoform A	1.18044	0.789769	22.7688	20.852	19.5125	20.6568	21.1698	19.4581	17.9423	18.4798	4	4	4	2.4	1616	176966
CG7714	CG7714	1.17776	1.58185	NaN	NaN	NaN	NaN	NaN	NaN	NaN	17.3071	1	1	1	5.3	225	22568.3
Nc73EF	Neural conserved at 73EF, isoform F	1.17337	1.87134	21.8505	22.6046	22.677	22.9819	23.5715	23.1452	23.7903	24.5646	22	2	2	27.4	1017	113625
CG9485	CG9485, isoform A;CG9485, isoform C;CG9485, isoform D;CG9485, isoform B	1.16925	1.68086	19.6909	NaN	18.7457	18.536	19.3361	20.7901	20.1463	20.1542	2	2	2	2	1554.5	175042
Zasp66	Z band alternatively spliced PDZ-motif protein 66, isoform I;HL08110p;Z band alternatively spliced PDZ-motif protein 66, isoform G;IP16036p;GH19182p;FI20184p1;Z band alternatively spliced PDZ-motif protein 66, isoform E	1.16471	4.08549	23.9065	23.0842	23.1981	22.8623	24.7674	24.5777	24.6196	24.9285	11	11	2	58.6	378	41808.8
Sxl	Sex lethal, isoform X;Protein sex-lethal;Sex lethal, isoform Y	1.14854	1.196	19.2363	19.9931	19.7431	19.6699	19.4296	19.5745	19.9563	19.59	2	2	2	5.1	352	38456.2
CG7580	AT13736p	1.14447	3.14577	23.6877	23.8603	23.7467	23.9425	24.737	24.4997	24.3559	24.4007	5	5	5	44.9	89	10092.7
14-3-3zeta	14-3-3 protein zeta	1.13792	0.627219	21.3471	20.0289	20.5095	20.4773	21.86	22.3547	21.1854	21.2322	11	1	1	41.1	248	28282.7
trol	Terribly reduced optic lobes, isoform BA;Terribly reduced optic lobes, isoform AS;Terribly reduced optic lobes, isoform AO;Terribly reduced optic lobes, isoform AN;Terribly reduced optic lobes, isoform AQ;Terribly reduced optic lobes, isoform AH;Terribly reduced optic lobes, isoform AF;Terribly reduced optic lobes, isoform AU;Terribly reduced optic lobes, isoform AT;Terribly reduced optic lobes, …	1.13568	2.38542	26.1583	24.3397	24.1119	23.5676	25.7677	25.0616	25.8276	24.9816	38	38	38	10.7	3998	443201
CG11876	CG11876, isoform A	1.13559	5.01837	27.2564	28.3912	28.6091	28.6825	28.3454	28.3723	28.3623	28.589	18	18	18	57	365	39351.4
CG5726	CG5726	1.13554	1.91592	20.1288	20.1255	19.898	19.9127	20.4853	21.2346	21.2134	20.1233	4	4	4	7.8	766	86592.4
SpdS	GH08387p;Spermidine synthase, isoform A	1.1354	0.361444	NaN	NaN	NaN	17.7661	19.1554	20.2013	19.5345	NaN	2	2	2	12.9	252	28250.8
scaf	GH05918p	1.12726	1.67064	27.7412	26.6251	25.8004	25.0501	26.2825	25.0626	25.5538	24.8561	18	18	18	41.2	655	71416.9
CG45081	CG45081, isoform A	1.12576	0.960045	21.3352	18.2873	18.0273	17.4522	18.3105	17.5896	17.3584	17.6489	1	1	1	10.9	92	9900.88
CG11284	CG11284, isoform A	1.12545	1.47071	NaN	19.9017	19.7614	19.3576	20.3249	20.7752	21.1552	19.9988	2	2	2	14	250	28803.6
ecd	Protein SGT1 homolog ecdysoneless	1.12233	2.57128	20.4722	20.1024	21.3833	21.3198	21.0917	20.867	20.429	20.0987	7	7	7	12.4	684	77908
CG14165	CG34382, isoform D;CG34382, isoform C	1.11796	0.569319	23.1233	21.6465	18.991	20.4662	21.7971	19.0995	18.3865	17.8376	7	7	7	11.7	804	89445.3
Mhc	Myosin heavy chain, muscle;Myosin heavy chain, isoform N	1.11212	0.414646	22.325	19.138	NaN	18.3187	20.2656	21.0058	21.6083	20.6689	173	2	0	65.7	1962	224609
Cpr92F	Cuticular protein 92F	1.10789	0.37417	25.3076	22.3422	20.0608	19.8498	22.2721	18.9659	18.3346	19.3125	6	6	6	34.4	381	39819.2
l(2)01289	Lethal (2) 01289, isoform A;Lethal (2) 01289, isoform G	1.1067	0.712753	21.4617	20.3109	20.0182	19.1475	20.9365	21.5627	20.5487	20.0967	17	3	3	32.7	1024	116996
eIF-5A	Eukaryotic translation initiation factor 5A	1.1048	2.05022	24.4295	23.843	23.4004	23.167	24.4412	24.6716	24.101	23.6275	9	9	9	40.9	159	17591.1
Clic	Chloride intracellular channel, isoform A	1.10474	0.380247	21.6617	NaN	NaN	NaN	21.7917	21.6526	22.0802	21.4407	3	3	3	16.9	260	30169.8
CG14482	CG14482	1.10182	1.39505	20.8261	20.142	20.3807	19.9486	21.6958	22.2033	22.3103	21.0339	2	2	2	38.6	57	6275.28
Mp20	Muscle-specific protein 20	1.09552	4.9709	25.7903	25.662	25.7937	25.7816	27.1269	27.3079	27.3065	27.1147	12	12	12	73.9	184	20190.1
pic	DNA damage-binding protein 1	1.09456	1.1063	NaN	NaN	NaN	NaN	18.564	19.0385	18.4853	NaN	2	2	2	2.1	1140	126045
His2A:CG33856;His2A	Histone H2A	1.09004	1.03892	26.9282	26.9783	26.7011	25.7878	25.9804	26.1731	26.2419	24.7722	5	3	3	41.9	124	13363.2
CG16912	Probable tyrosine--tRNA ligase, mitochondrial	1.08584	1.84518	20.0198	17.2358	17.9454	18.2959	18.1795	18.4961	18.497	17.9055	3	3	3	8.4	464	52574.6
Aats-trp	FI06027p	1.07932	1.01524	18.9627	18.885	18.6884	18.4771	19.1051	21.3273	21.1631	19.7304	3	3	3	10.7	430	47971
CG3548	CG3548	1.07725	1.70462	19.6407	20.4194	19.6686	20.1587	20.9208	21.1373	20.3271	20.1607	6	6	6	14.3	453	50471
Mlp60A	Muscle LIM protein 1;Muscle LIM protein at 60A, isoform B	1.07573	3.29553	23.9544	23.6377	24.5963	23.7773	25.2102	25.1698	25.0026	25.0848	4	3	3	48.9	289	31472
sip1	Septin interacting protein 1, isoform B;Septin-interacting protein 1	1.07189	3.89667	24.0735	25.3668	25.5819	25.6187	24.9799	24.7743	24.8782	24.6564	26	26	26	31.8	839	94827.6
eIF3-S5-1	Eukaryotic translation initiation factor 3 subunit F-1	1.07113	2.40745	21.1165	21.4017	21.4275	21.6996	22.8673	22.2798	22.9235	22.0889	4	4	4	18.9	280	31104.8
CG1516	Pyruvate carboxylase	1.06868	4.27455	27.3639	26.9995	26.9997	26.92	27.7662	28.0609	28.0247	27.737	61	61	61	53.8	1189	131769
melt	Melted, isoform D;Protein melted	1.06847	1.03889	19.7445	18.8758	18.6373	18.9932	19.72	21.7724	20.7664	19.6063	4	4	4	5.6	992	107908
CG7461	CG7461	1.06293	3.4663	21.3739	20.994	20.9395	20.5284	22.5262	22.4099	22.6964	22.232	9	9	9	18	627	68367.7
Got2	Aspartate aminotransferase	1.05475	3.33299	25.9911	27.1253	27.3609	27.2801	26.7028	26.8896	27.2639	27.2186	18	18	18	48.3	427.5	47678.7
Arc42	Arc42	1.05464	0.513967	18.6621	NaN	NaN	NaN	19.8609	18.6105	18.9547	20.251	3	3	3	8.9	405	43654.1
Pp2B-14D;CanA-14F;CanA1	Protein phosphatase 2B at 14D, isoform B;Calcineurin A at 14F, isoform C;Serine/threonine-protein phosphatase 2B catalytic subunit 2;Serine/threonine-protein phosphatase 2B catalytic subunit 3;Serine/threonine-protein phosphatase 2B catalytic subunit 1	1.05338	0.435144	19.0432	19.3542	19.1498	19.5816	19.9923	20.5437	20.0463	20.5846	2	2	2	4.4	584	64285.3
sesB	Stress-sensitive B, isoform E;ADP,ATP carrier protein	1.05128	3.79794	27.8612	28.1122	27.9688	27.9166	29.2199	29.1673	29.4869	29.3495	30	30	30	78.6	299	32909.2
ade3	Adenosine 3, isoform C;Trifunctional purine biosynthetic protein adenosine-3;Adenosine 3, isoform B	1.04988	2.21479	22.1755	21.8264	21.2488	21.2384	22.1074	22.6439	22.2074	22.6246	14	14	14	11.9	893.5	95156.2
Gasp	Gasp, isoform A;Gasp, isoform B	1.04974	2.69555	25.7674	23.9375	23.877	23.0938	24.2017	23.574	23.9172	23.3198	10	10	10	41.5	246.5	27229.3
Rpn11	26S proteasome non-ATPase regulatory subunit 14	1.0488	2.25157	21.9656	21.3744	21.027	21.0483	22.7934	23.1244	22.7744	22.1779	3	3	3	14	308	34400.7
slgA	Sluggish A, isoform I;Sluggish A, isoform F;Sluggish A, isoform N;Proline dehydrogenase 1, mitochondrial	1.04516	1.01652	NaN	19.8973	19.431	20.741	20.2613	20.6204	20.6425	21.1602	2	2	2	6.7	669	75952
l(1)G0255	LP02262p;FI05334p	1.03916	0.403799	18.6965	18.2882	18.9492	18.5566	19.3195	19.9155	19.9169	18.3825	1	1	1	2.8	481	52017.6
EG:87B1.3	CG3835, isoform A	1.03616	0.995901	NaN	NaN	20.3547	19.9647	NaN	19.9072	19.9379	19.6341	2	2	2	5.4	533	58364.1
EfTuM	Elongation factor Tu	1.03573	2.25158	24.2337	25.2236	25.3617	25.5041	25.2477	25.5639	25.4186	26.0328	11	11	11	41.3	489	53992.5
SCAR	SCAR;SCAR, isoform E;SCAR, isoform C;FI18307p1;SCAR, isoform F;MIP02973p	1.03506	0.638915	NaN	18.5337	18.948	19.3056	19.6156	19.6833	19.4109	19.2926	2	2	2	4.1	640.5	70085.6
CG31792	CG31792, isoform B	1.03252	0.288871	NaN	NaN	18.922	18.6769	NaN	20.1069	19.7947	18.898	2	2	1	1.4	1323	148102
CG42354	CG42354, isoform A;CG42354, isoform F	1.02856	2.4753	19.4749	17.6495	18.452	18.2502	19.0168	19.2479	19.11	18.3382	2	2	2	6.4	502.5	56709
CG15747-RA	CG15747, isoform A	1.02643	4.08149	23.5601	24.7323	24.5431	25.1336	23.7649	23.5492	23.4909	23.6374	10	10	10	33.9	387	44715.6
sec3	Exocyst complex component 1	1.02476	0.564473	NaN	NaN	19.1979	NaN	18.6485	19.5503	19.0084	19.2896	2	2	2	3.8	889	102695
Sec13	Sec13	1.02189	2.10157	22.6126	21.7388	21.6744	21.3846	22.5947	22.7002	22.687	22.2365	6	6	6	24.2	356	39527.6
CG9775	CG9775, isoform A;CG9775, isoform D	1.02186	2.43793	24.7968	25.6292	25.5068	25.9074	24.8719	24.6502	24.9193	24.4096	18	18	18	41.8	368	40142.4
cathD	CathD	1.01932	2.36928	23.9125	23.1749	23.269	22.8365	23.8059	24.5663	24.231	23.9582	5	5	5	20.4	392	42472.7
OstStt3	Oligosaccharyl transferase 3	1.01918	0.36529	NaN	20.2642	19.6807	19.9193	19.8377	20.5216	20.0111	20.7189	3	3	3	7.5	774	87626.8
Rya-r44F	Ryanodine receptor 44F	1.01489	0.141614	22.6737	22.3595	22.0053	22.2422	24.0384	23.857	NaN	27.9136	7	7	7	1.9	5120	580250
CG10306	Eukaryotic translation initiation factor 3 subunit K	1.013	1.07317	19.8402	20.6923	20.1651	19.6475	20.5948	22.4825	22.1926	21.4672	4	4	4	25.2	222	25665.6
smid	MIP20544p;Smallminded, isoform H;Smallminded protein;Smallminded, isoform A	1.01027	3.02994	22.339	21.9243	20.9051	20.6424	21.9631	21.9483	22.0572	21.4813	5	5	5	7.8	935	103429
CG5808	CG5808	1.00957	4.34585	24.8194	25.5801	25.4796	25.7776	25.114	25.2419	25.0317	24.8393	16	16	16	29.2	653	75470.2
Mcm3	Minichromosome maintenance 3, isoform B;DNA replication licensing factor Mcm3	1.00873	0.513529	20.705	18.8209	18.82	19.1667	18.8377	18.4755	18.4353	19.5094	3	3	3	7.5	818.5	90854
nompA	IP14862p;No mechanoreceptor potential A, isoform C;No mechanoreceptor potential A, isoform A	1.0077	0.749448	21.4511	20.0723	18.2279	17.6228	20.0007	18.2757	17.8642	17.0443	2	2	2	4.1	1549	174237
Aats-ala	Alanine--tRNA ligase, cytoplasmic	1.00678	1.5643	20.3928	19.2276	19.1752	19.6915	20.6962	21.6272	21.6136	21.2448	9	9	9	12.1	966	107741
mesh	Protein mesh	0.999133	1.32858	17.1676	17.8857	17.4776	17.2539	18.5056	18.4323	18.0197	16.9633	8	8	8	9	1442.5	163708
ACC	CG11198, isoform B;CG11198, isoform A;CG11198, isoform D	0.992115	4.14132	26.1683	26.2125	26.2866	26.0484	26.9111	27.2641	27.0295	26.9047	69	69	69	38.1	2482	278596
Pfk	6-phosphofructokinase	0.987622	2.83535	25.6424	25.1306	25.206	24.941	26.2687	26.8546	26.8306	26.3386	30	30	30	43.4	788	86720.1
CG9691	CG9691, isoform A	0.987428	1.43331	20.1262	19.549	20.1139	20.2774	21.7243	20.2814	20.5646	20.6186	3	3	3	26.4	121	12917.9
CG13847	CG13847	0.987415	1.21875	21.4299	16.6153	16.3623	16.197	16.8067	15.9188	16.5835	NaN	1	1	1	2.9	759	84397.2
TpnC73F	Troponin C at 73F, isoform C;Troponin C, isoform 3	0.982755	1.56065	27.3069	25.3777	25.1581	24.401	26.652	26.2975	26.5053	25.7857	8	8	6	59.4	155	17695.9
Smn	Survival motor neuron protein	0.981772	0.306042	NaN	NaN	NaN	NaN	19.9522	19.6291	NaN	NaN	1	1	1	4.4	226	24621.6
thoc6	Thoc6, isoform B;THO complex subunit 6	0.978612	0.73267	19.3193	19.7174	20.1779	20.4353	18.9853	19.1528	19.0272	NaN	2	2	2	11.7	350	39221.3
CG8079-RB;CG8079	CG8079, isoform B;CG8079, isoform A	0.976272	2.81744	23.8881	25.1286	25.1045	25.5548	24.563	24.9567	24.4879	24.3553	14	14	14	27.2	600	66830.5
qsm	GH08941p	0.975717	0.393357	21.9867	20.745	19.4058	16.5129	20.7942	18.5075	19.8399	18.5817	2	2	2	4.8	414	45561.8
CG4702	CG4702	0.975055	0.498254	19.9617	NaN	NaN	NaN	18.7961	18.5289	18.7731	NaN	1	1	1	4.9	286	31424.5
SdhA	Succinate dehydrogenase [ubiquinone] flavoprotein subunit, mitochondrial	0.969725	2.01768	21.8723	21.5279	21.4742	20.9535	22.9873	23.0681	23.5064	22.4371	12	12	12	22.2	661	72342.9
Pka-R2	cAMP-dependent protein kinase type II regulatory subunit;cAMP-dependent protein kinase R2, isoform D;cAMP-dependent protein kinase R2, isoform E	0.96865	0.639715	17.4105	16.6733	17.429	NaN	18.2962	NaN	17.7351	17.4965	2	2	2	5.6	375	42520.4
Galphaq	G protein alpha q subunit	0.966119	0.996113	18.5187	NaN	NaN	NaN	18.3974	18.3546	18.1056	18.5082	1	1	1	4.2	353	41638.5
shrb	GH13992p	0.965088	1.17826	18.4974	18.1548	18.6152	18.0226	18.9512	18.7488	20.461	18.8577	3	3	3	16.8	226	25443.6
Syp	CG17838, isoform G	0.963771	0.440915	21.007	21.2649	21.1512	20.9302	20.7124	21.1401	20.4791	20.9307	10	2	2	27.9	384	41147.2
Tsp	Thrombospondin, isoform G;Thrombospondin, isoform A	0.963589	0.543318	18.1994	18.2861	18.1988	18.6735	18.1742	20.4383	18.5796	18.2391	2	2	2	3.7	855.5	95238.2
CG17374	CG17374	0.956449	4.27241	26.5707	26.7169	26.5287	26.5103	27.5069	27.7978	27.8653	27.7993	77	77	76	37.1	2394	266851
CG10425	CG10425	0.953885	1.02862	17.7396	17.9184	17.9092	17.6327	19.7097	19.9902	20.467	18.2562	1	1	1	4.8	336	36569.8
me31B	Putative ATP-dependent RNA helicase me31b	0.953251	2.24455	24.053	23.9091	23.9022	23.5847	24.2478	24.5038	24.6499	24.1969	7	7	7	17.2	443.5	50294.4
CG6724	Ribosome biogenesis protein WDR12 homolog	0.94827	2.18764	19.5722	NaN	NaN	NaN	20.3517	19.9468	20.0301	19.4584	4	4	4	11.5	419	47094.3
CG12163	Putative cysteine proteinase CG12163	0.945133	2.03642	21.687	22.6795	22.3825	21.8421	22.1884	23.0182	23.2515	22.9227	6	6	6	17.1	544.5	61253.1
RfC4	Replication factor C subunit 2	0.944968	0.55674	18.3485	NaN	NaN	NaN	NaN	19.4301	18.9589	18.841	2	2	2	6.6	331	37173.1
CG7159	CG32354	0.944527	0.839121	25.6978	24.631	23.262	24.3961	24.2276	22.7869	22.5312	22.0678	19	19	19	32	662	71947.7
jagn	Jagunal, isoform B;Protein jagunal	0.944046	0.753618	18.955	19.3079	18.9951	19.1291	19.6971	19.7285	20.1818	19.4	1	1	1	8.1	197	23035.9
CG13840	CG13840	0.943922	1.32267	21.8118	19.9613	17.4247	16.906	19.7749	19.1063	18.05	18.7921	3	3	3	8.3	530	60227.6
Cg25C	Collagen alpha-1(IV) chain	0.943832	1.08268	23.1623	21.8475	21.3774	20.7531	23.5867	21.5462	21.954	22.2565	3	3	3	1.9	1779	174300
Droj2	DnaJ-like-2, isoform A	0.93902	3.18219	23.1414	22.8129	22.5097	22.2538	23.6148	23.8228	23.6227	23.2805	9	9	9	25.8	403	45230.5
CG34126	CG34126, isoform D;CG34126, isoform B;CG34126, isoform G;CG34126, isoform F;CG34126, isoform E	0.935086	0.604353	19.1739	NaN	NaN	NaN	19.597	NaN	NaN	18.5746	2	2	2	1.5	1504	164860
CG10639-RA	CG10639, isoform A	0.930707	2.93466	23.6459	22.6322	23.5766	23.4535	23.6964	23.6228	24.025	23.6056	11	11	11	31	455	50127.8
Cpr47Ec	Cuticular protein 47Ec	0.927301	0.577885	22.3902	NaN	18.4248	19.0902	19.3373	18.5271	18.5868	18.5569	2	2	2	32.8	131	14183.2
CG9297-RA;CG9297	CG9297, isoform A;CG9297, isoform B	0.92552	1.36183	21.8643	19.8316	19.109	19.7188	21.5029	20.2613	20.9114	21.1224	5	5	5	7.4	941	104927
Pmm45A	Phosphomannomutase 45A, isoform B;Phosphomannomutase 45A, isoform A	0.924625	2.2457	19.4094	19.2609	18.9409	18.4616	19.4111	19.8078	19.96	19.6615	1	1	1	3.9	603.5	67676.8
dp	Dumpy, isoform S;Dumpy, isoform P;Dumpy, isoform U;Dumpy, isoform T;Dumpy, isoform O;Dumpy, isoform Q;Dumpy, isoform AA;Dumpy, isoform J;Dumpy, isoform I;Dumpy, isoform R;Dumpy, isoform X;Dumpy, isoform W;Dumpy, isoform Y;Dumpy, isoform Z;Dumpy, isoform V;Dumpy, isoform M	0.923997	0.614761	26.3599	24.2895	23.3594	22.6694	24.3629	23.1363	23.2312	21.7985	47	47	47	3.7	19100.5	2034120
RFeSP	Cytochrome b-c1 complex subunit Rieske, mitochondrial	0.922668	1.95405	23.1026	23.4478	22.9662	22.6786	24.137	23.7596	23.4681	24.2895	5	5	5	30.9	230	24872.3
Tm1	Tropomyosin-1, isoforms 9A/A/B	0.9223	1.6885	23.63	23.8854	23.0296	22.716	23.3594	24.1514	23.8121	23.4656	39	2	0	81.3	284	32618.4
Idgf4	Imaginal disc growth factor 4, isoform C;Chitinase-like protein Idgf4	0.919425	0.309165	19.1255	17.8095	17.9905	NaN	18.8792	19.4433	20.5856	NaN	3	2	2	8.4	442	48604.2
Ced-12	Ced-12	0.919257	1.19942	22.9929	22.8961	22.2929	21.9793	24.0695	22.8894	23.1687	23.2061	6	6	6	10.6	724	82976.7
ect	Ectodermal, isoform E;Ectodermal, isoform A;Ectodermal, isoform F	0.9187	1.92865	21.764	21.5453	21.4852	21.599	21.8977	21.5292	21.0161	21.265	7	7	7	16.1	581	62141.3
Clc	Clathrin light chain, isoform B;Clathrin light chain	0.91754	2.20617	23.6135	23.8866	23.9882	23.7357	24.5392	25.0018	24.8323	24.4786	10	10	10	41.1	219	23840.3
mfas	Midline fasciclin, isoform C;FI19380p1;Midline fasciclin, isoform H;GH11519p;Midline fasciclin, isoform E;Midline fasciclin, isoform F	0.915824	2.93565	24.853	24.4934	23.9158	23.7904	24.9279	25.0997	25.0316	24.5938	20	20	20	30	839.5	93104.9
CG18431	CG4844, isoform A	0.914877	1.86359	22.7992	23.4548	20.1075	19.3311	19.6477	18.9379	19.0902	18.6599	4	4	4	26.5	283	31120.2
CG8858	Proteasome-associated protein ECM29 homolog	0.914597	0.117399	24.0025	23.5809	23.8236	23.774	23.2422	24.0446	23.9957	NaN	4	4	4	3.5	1890	212087
CG14732;CG31211	CG31211, isoform A;CG31211, isoform B;CG31211, isoform C	0.913602	2.21324	22.8775	23.8653	24.732	24.8037	23.228	23.4816	22.7972	22.8848	12	12	12	16.8	874	95986
aralar1	Calcium-binding mitochondrial carrier protein Aralar1	0.911585	2.47399	20.9933	21.7879	22.5703	22.4956	23.7731	23.9547	24.6229	24.2238	16	16	15	28.3	682	75129.2
CG13023	CG13023, isoform A	0.886967	1.15918	32.7849	31.8498	30.929	30.4288	31.6981	30.1663	29.9513	30.468	35	35	35	76.9	411	45084.7
Cpr73D	Cuticular protein 73D	0.880672	0.396098	23.1488	21.1889	21.1366	21.3032	22.1177	19.9137	18.1702	18.232	5	5	5	10.9	597	62366.6
CG6812-RA	CG6812	0.877022	2.39743	20.0031	20.3763	20.4552	20.9989	20.9881	20.9261	21.2359	20.8558	3	3	3	10.7	327	36495.6
CG8525	CG8525	0.876605	0.800225	19.4397	19.3417	19.1676	19.4986	19.6385	20.0046	20.4254	20.43	2	2	2	4	347	38502.9
sals	CG31374, isoform D;CG31374, isoform B;CG31374, isoform A	0.874707	1.2984	21.1501	20.2464	19.6773	19.8446	20.9083	20.9256	20.1775	20.068	5	5	5	8.5	899	100626
Nc73EF	Neural conserved at 73EF, isoform I;Neural conserved at 73EF, isoform A	0.868293	3.89006	24.2543	24.7043	25.0217	24.9633	25.6983	25.399	25.7008	25.4935	23	23	3	29.3	1056.5	117741
CG6480	Protein FRG1 homolog	0.867962	1.0371	NaN	18.3581	19.294	18.0606	19.5928	19.5953	19.6756	19.2281	4	4	4	22.1	262	29529.6
Osbp	Oxysterol-binding protein	0.867248	1.01326	19.2945	19.9538	20.0224	19.5807	20.143	21.6108	20.2334	19.9913	3	3	3	6.2	784	89324.8
BG:DS01523.2	CG43333	0.864311	0.257932	21.0533	20.7	19.142	19.887	20.3471	NaN	NaN	18.4352	2	2	2	2.8	1166	128893
Ccp84Ad	Ccp84Ad	0.860909	1.03902	25.739	25.5634	24.9671	24.3988	25.2859	23.3738	24.0786	23.6291	13	5	5	74.4	199	20822.7
Tm1	Tropomyosin-1, isoforms 9A/A/B;RE08101p;Tropomyosin-1, isoforms 33/34	0.85954	1.67382	25.5756	23.897	24.3548	24.8256	25.7848	25.6254	25.6597	24.7393	40	2	0	82.8	509.5	53977.6
EG:BACN32G11.4	CG14787	0.85724	1.33666	18.9064	18.8214	19.2381	19.2015	19.4063	20.8697	19.9473	19.5582	2	2	2	12.7	260	29153.7
CG1542	Probable rRNA-processing protein EBP2 homolog	0.855587	0.71651	18.4489	18.4747	18.7367	18.6585	19.3799	19.3954	19.3892	NaN	2	2	2	6.8	307	35077.4
Rpb7	IP02321p	0.854538	0.342873	19.6512	22.4417	NaN	18.9276	17.6397	17.9125	20.6616	NaN	2	2	2	21.4	173	19107.2
CG15820-RA	CG15820	0.853878	0.758853	NaN	17.357	17.2966	NaN	NaN	18.8112	17.775	18.3262	1	1	1	3.2	308	35352.8
Gp210	Gp210	0.847093	1.46313	21.5822	20.9644	21.7642	20.7131	21.0843	21.2828	21.8868	20.9787	10	10	10	7.7	1876	209792
l(2)efl	Protein lethal(2)essential for life	0.8381	2.17139	27.563	26.6887	26.4201	26.3997	27.8248	28.085	27.8048	27.2502	15	15	15	89.8	166	19271.7
Mlc-c	Myosin-2 essential light chain;Myosin light chain cytoplasmic, isoform B	0.836572	3.50203	26.026	26.1946	26.033	25.7993	26.4918	26.5717	26.6172	26.3894	11	11	11	94.6	150	17055.5
Cda5	Chitin deacetylase-like 5, isoform H;Chitin deacetylase-like 5, isoform A;Chitin deacetylase-like 5, isoform F;Chitin deacetylase-like 5, isoform G;Chitin deacetylase-like 5, isoform I;Chitin deacetylase-like 5, isoform J;Chitin deacetylase-like 5, isoform B;Chitin deacetylase-like 5, isoform E	0.836091	0.76365	22.5101	18.1117	17.2839	17.309	18.2794	17.591	17.2851	17.343	3	3	3	5.7	1676	188058
haf	Hattifattener, isoform B;Hattifattener, isoform C	0.834658	0.704664	19.538	17.3952	17.1089	NaN	17.3633	17.0683	17.6573	NaN	1	1	1	1.7	981.5	104261
tyn	RE15579p	0.834423	1.16645	26.7013	25.8649	24.9455	25.0586	25.8182	24.7282	25.3613	24.1809	10	10	10	21.8	715	80682.4
MED17	Mediator of RNA polymerase II transcription subunit 17	0.825905	1.27641	NaN	21.4878	21.5118	22.1049	22.4523	23.468	23.219	22.1507	6	6	6	14	642	71556.9
Ras64B	Ras-like protein 2	0.824977	1.05211	17.7697	NaN	18.0415	18.0451	NaN	17.8724	17.9723	NaN	1	1	1	7.8	192	22235.6
TpnC47D	Troponin C, isoform 2	0.82431	0.665471	23.6087	22.0776	21.7864	20.9165	23.6046	22.7438	23.0004	22.2639	6	4	4	41.3	155	17882.9
CG5642	Eukaryotic translation initiation factor 3 subunit L	0.822195	1.96407	21.6292	21.5828	21.5618	21.1178	22.4409	22.5446	22.4241	22.5808	5	5	5	10.6	539	63223.3
tws	Protein phosphatase PP2A 55 kDa regulatory subunit	0.82159	2.70688	21.408	21.6171	21.4623	21.116	22.0139	22.4157	22.3822	22.4359	7	7	7	21	471	53877.9
CG3355	CG3355, isoform A	0.818505	1.05113	21.6079	21.9471	21.4154	21.2903	22.0944	22.3631	21.8668	22.0597	4	4	4	18.8	314	34464.6
CG14397-RA	CG14397	0.815149	1.58827	20.7656	20.4713	19.3554	21.5077	19.8396	19.1515	19.8676	19.8461	3	3	3	42.1	107	12418.4
Galk	GH11113p	0.813017	1.11091	19.2525	18.4267	19.1096	19.2723	20.4044	19.251	20.6384	19.251	4	4	4	9.8	490	54126.8
CG8436	CG8436	0.809645	0.9325	22.2394	22.977	23.045	23.6478	22.7096	23.4749	22.8468	22.5428	4	4	4	23.1	242	27717
Bc	GH04080p	0.808212	2.85869	26.5918	25.2637	25.0323	24.7481	26.3722	26.4349	26.6918	26.5149	23	23	23	37.5	690	79091
betaTub97EF	Beta-Tubulin at 97EF, isoform B;Beta-Tubulin at 97EF, isoform A	0.807843	1.94907	23.3485	23.469	23.5326	23.08	24.0424	24.6588	24.6695	24.7581	17	8	8	43.3	489.5	54911.6
CG1674	CG1674, isoform M;CG1674, isoform E;CG1674, isoform I;CG1674, isoform J;CG1674, isoform B;CG1674, isoform K;CG1674, isoform L	0.807442	2.21965	24.7587	23.9242	23.7955	23.5972	25.3026	25.0448	25.146	24.4569	21	21	21	32.4	843	93310.9
Lcp65Af	Cuticle protein DCP7	0.804764	0.457932	NaN	17.031	16.473	NaN	NaN	NaN	NaN	NaN	2	2	2	41	100	10580.7
eff	Ubiquitin-conjugating enzyme E2-17 kDa	0.804285	1.30879	18.8619	18.7425	18.7607	18.2557	20.2147	19.4235	19.7043	18.7483	1	1	1	7.5	147	16678.2
Sam-S	S-adenosylmethionine synthase	0.80181	0.385239	NaN	18.2871	18.8964	18.3333	18.6635	20.1738	19.8122	19.9725	2	2	2	5.9	408	44764.4
CG6028	CG6028	0.7941	1.25917	23.0264	23.1748	22.7884	22.8345	23.212	23.7622	23.8814	23.6134	7	7	7	32.4	293	32293.3
Osi6	LD17368p	0.788591	0.201023	22.6062	NaN	23.1531	23.9952	22.2573	22.2603	23.7812	23.877	1	1	1	6.7	312	32090.7
CG8888	CG8888	0.78853	2.02979	25.2376	24.9117	24.6867	24.6368	25.5155	26.1521	26.4364	26.0888	15	15	15	41.5	388	43479.2
jigr1	Jing interacting gene regulatory 1, isoform A	0.784863	0.600809	19.644	21.8277	22.3979	22.4741	20.7903	21.5545	21.6762	21.8849	6	6	6	22	336	38775.9
arm	Armadillo, isoform F;Armadillo segment polarity protein	0.784188	0.530313	18.4732	17.2859	NaN	NaN	17.7566	17.9782	17.9479	NaN	2	2	2	2.7	843	91152.5
Taf10b	Transcription initiation factor TFIID subunit 10b	0.781579	0.709918	25.4948	26.4361	26.5748	26.6429	25.9133	26.285	27.1834	26.2658	6	6	6	61	146	15784.5
Cpr65Ea	Cuticular protein 65Ea	0.780567	1.1851	NaN	20.2523	18.6063	18.8107	20.5597	19.0762	19.3749	19.514	1	1	1	11	127	14010.8
CG9934	CG9934, isoform A	0.780017	1.12221	19.8763	19.9157	19.9935	20.1428	21.076	20.5159	20.0884	20.748	3	3	3	4.7	1217	138592
eIF3-S9	Eukaryotic translation initiation factor 3 subunit B	0.777778	2.5838	24.0292	23.9982	23.6909	23.4558	24.5835	25.0172	24.779	24.3114	17	17	17	28.8	690	80441.5
l(1)G0156	Probable isocitrate dehydrogenase [NAD] subunit alpha, mitochondrial	0.776493	5.45768	27.3031	27.2656	27.0904	26.9935	27.6913	27.7998	27.8478	27.8188	19	19	19	53.4	365.5	39714.2
Tor	Target of rapamycin, isoform B;Target of rapamycin	0.775743	1.73797	19.0363	19.8536	19.1241	19.5641	20.6077	21.0414	20.4916	19.9587	4	4	4	2.6	2470.5	281098
LamC	Lamin-C	0.775037	3.31184	25.098	24.2742	24.3888	24.1693	25.4873	25.4803	25.5406	25.1247	35	35	35	63.3	621	69859.7
Sec61alpha	DSec61alpha	0.77126	1.58434	22.4643	21.3888	21.6269	21.241	23.5937	23.4269	23.4361	23.0728	7	7	7	11.8	476	52184.7
CG5599	CG5599	0.770387	0.66241	18.1971	19.3976	19.9788	20.1799	20.7427	20.1534	21.3585	20.2199	2	2	2	7.1	462	50073.1
LanA	Laminin subunit alpha	0.769203	1.64372	22.8191	21.8316	21.3781	21.156	22.6191	22.7903	22.6104	21.8816	17	17	17	6.4	3712	411157
CG32694	CG32694, isoform E	0.768428	0.80896	18.7559	18.1958	17.6064	16.8628	18.0886	16.9716	18.4051	17.2305	1	1	1	6.4	187	19962
emb	Exportin-1	0.767568	0.343783	19.2665	NaN	17.9783	17.5168	18.669	18.4256	19.1982	NaN	1	1	1	1.7	1063	122799
mxt	Mextli, isoform F;Mextli, isoform G;GH11071p;Mextli, isoform D	0.762784	0.582254	20.5786	20.3771	20.107	20.5885	20.9043	21.6168	23.4711	23.0757	4	4	4	6.4	642	68928
l(3)neo18	Lethal (3) neo18, isoform A	0.762294	0.211204	NaN	NaN	NaN	NaN	NaN	NaN	NaN	NaN	1	1	1	6.5	186	22030.1
Cdep	Cdep, isoform E	0.761262	3.27099	21.1257	20.3009	20.7951	20.7731	21.7412	21.7834	21.3742	21.6111	5	5	5	6.9	1167	132115
Rbcn-3A	Rabconnectin-3A	0.753188	0.835497	NaN	18.4216	18.5899	18.4207	18.6593	19.1267	19.1285	19.0527	3	3	3	1.3	3426	377321
CG14095	CG14095	0.752836	0.16505	25.0294	NaN	NaN	NaN	21.5324	21.1125	21.709	22.6436	1	1	1	14.2	162	15946.2
CG4038	Probable H/ACA ribonucleoprotein complex subunit 1	0.743349	3.75276	25.9582	26.5299	26.7959	26.7349	26.5933	26.5727	26.7589	26.4823	12	12	12	43.9	237	22665
Pgam5	Phosphoglycerate mutase 5, isoform B;Serine/threonine-protein phosphatase Pgam5, mitochondrial	0.73842	1.42234	18.9712	19.6482	19.1462	18.7825	19.4734	19.6015	20.2187	19.7593	2	2	2	12.2	288.5	33101.7
CG7430	Dihydrolipoyl dehydrogenase	0.735797	2.28337	22.7607	23.3264	23.6449	23.9622	23.0611	22.946	23.0419	23.2265	14	14	14	28	504	53084.9
Msr-110	Msr-110, isoform D;LD44960p;FI04596p;Msr-110, isoform C	0.733359	2.08706	23.148	23.3758	22.6908	23.224	24.2806	24.2327	24.2148	23.6214	14	14	14	33.4	612.5	69930.9
ttm50	Mitochondrial import inner membrane translocase subunit TIM50-C	0.73166	0.693799	18.9267	16.222	NaN	16.3203	17.6758	18.0263	19.0457	NaN	1	1	1	2.6	428	49671.5
Esyt2	CG6643, isoform A;CG6643, isoform B	0.724197	1.43973	NaN	NaN	18.1441	18.0784	19.5085	19.9245	19.8816	19.5157	2	2	2	4.4	832.5	92661.6
CG18528	CG18528	0.722342	0.920315	17.3382	18.6476	18.3415	NaN	18.3246	19.0706	19.5852	19.1213	3	3	3	7.1	493	54945.9
CG10672	CG10672	0.718659	0.686326	20.9827	20.9214	20.8203	20.085	19.7109	21.5106	20.9589	19.9652	3	3	3	13.2	317	33617.5
Cht3	Chitinase 3, isoform B;Probable chitinase 3	0.71704	1.33299	27.9967	26.2518	25.454	25.1672	26.0886	25.0823	25.3648	25.0748	45	45	45	23.6	2286	258777
Gfat2	GH12731p	0.716255	1.47553	19.8994	20.7415	20.8501	20.6845	21.6591	22.6513	21.8039	21.8443	10	7	7	18.9	683	76539.1
CG1965	CG1965	0.70951	3.08176	24.2901	25.5467	25.9491	25.9714	25.1342	24.8644	25.0114	24.6129	25	25	25	34.3	905	102625
CG11873	CG11873	0.709403	1.65033	21.339	23.5946	23.7901	23.714	23.2577	23.2238	22.9792	22.8109	20	20	20	12.5	2976	319392
CG3689	CG3689, isoform B;CG3689, isoform C	0.708598	1.89939	19.5432	18.8195	19.2782	18.2494	19.2585	19.1267	18.5615	18.6766	5	5	5	31.5	220	24995.7
Dic1	BcDNA.GH02431	0.70699	1.28323	19.1226	19.0048	18.988	18.8015	20.5858	19.7295	19.9386	20.7584	2	2	2	7.1	280	30705.7
Sec63	RE14391p	0.704093	1.22117	21.2555	21.434	21.2246	21.481	22.8244	23.2636	22.6811	22.016	6	6	6	11.4	753	85853.6
CG6686	CG6686, isoform B;CG6686, isoform A	0.703043	2.54018	28.8977	30.0068	30.1907	30.6132	29.4552	29.2235	28.9343	28.9643	62	62	62	49.9	967	112239
Rpt4	Regulatory particle triple-A ATPase 4	0.698783	2.48605	24.0241	24.0963	23.8694	23.8486	25.0437	25.2288	25.1747	24.9107	15	15	15	46.3	397	44911.1
Ank	Ankyrin, isoform B	0.69427	1.31058	21.0757	20.9808	20.9722	21.5147	22.4891	22.8972	22.7493	22.7302	9	9	9	8.3	1549	170168
mtacp1	Acyl carrier protein;Acyl carrier protein, mitochondrial	0.685133	2.07369	20.8777	21.3225	21.8395	21.7297	21.8973	22.1117	22.2607	21.7831	2	2	2	10.5	152	17235
CG11583	Ribosome biogenesis protein BRX1 homolog	0.68413	0.673617	19.7369	20.0601	20.1182	19.5479	19.4349	20.9015	20.5415	19.0951	5	5	5	18.4	359	41618.4
CG15211	CG15211, isoform A	0.683419	0.180251	NaN	21.1694	20.5662	19.3243	20.3655	19.7635	20.3407	NaN	1	1	1	5.1	177	18910.1
CG43294	CG43294, isoform A	0.683224	0.100325	23.8937	23.0207	19.4083	22.8286	NaN	NaN	24.1162	22.8553	3	3	3	21.8	124	14602.7
SH3PX1	Sorting nexin	0.6832	1.06225	19.3148	19.2162	19.7459	19.5016	21.5842	21.4643	21.6439	20.5865	4	4	4	7.6	565	63166.9
14-3-3epsilon	14-3-3 protein epsilon	0.678917	2.34007	25.9584	25.2916	25.3797	25.007	26.2427	26.3747	26.2467	25.7592	18	18	17	60.9	260.5	29619.8
Dys	Dystrophin, isoform D	0.677773	1.07293	18.884	18.8526	19.5678	19.2662	20.6349	21.1632	20.4652	19.6461	3	3	2	2	1854	205723
CG11395	CG11395	0.677716	0.76633	22.8599	21.256	20.9057	19.8983	22.2817	20.565	21.8257	21.0024	2	2	2	11.6	456	48784.5
TwdlT	LP07342p	0.675785	2.3765	23.6987	22.2708	21.2679	21.7677	22.0158	21.4684	21.8314	21.9475	4	4	4	26.2	286	27028.5
Rsf1	RE39606p;RNA-binding protein Rsf1	0.675388	0.853825	22.2637	21.0036	20.9459	20.2644	21.4705	21.7907	21.8397	21.3503	4	4	4	22	198.5	21285.6
fon	Fondue, isoform B;Fondue, isoform A;Fondue, isoform D	0.675308	0.787932	25.2458	23.9678	23.9813	23.5886	26.2325	25.2336	25.4842	24.2419	14	14	14	23.4	574	57644.8
Unc-115b;Unc-115a	Unc-115, isoform B;Unc-115, isoform D;CG31352, isoform D;Unc-115, isoform C;CG31352, isoform A;CG31352, isoform C;CG31352, isoform B	0.672206	1.0079	22.3978	23.047	22.5359	21.826	22.9584	23.1784	22.5456	21.8412	9	9	9	17	784	86260.7
CG8545-RA	CG8545	0.671877	2.48756	21.039	21.639	21.5172	21.9789	21.857	21.9995	21.6522	21.5665	6	6	6	9	891	99841.5
Cam	Calmodulin	0.67134	2.79592	23.5368	24.4489	23.6392	23.5687	24.2309	24.7293	24.3846	24.6321	7	7	7	47	149	16810.6
CG13047	CG13047	0.67123	0.34782	19.9119	18.465	18.0922	17.1811	19.4164	19.0522	20.6338	18.5487	2	2	2	22.4	170	16630.1
CG33303	CG33303, isoform A	0.67097	2.5315	23.9929	24.0803	24.0564	23.8668	24.9795	25.4778	25.3703	25.2581	14	14	14	43.9	458	51709.7
CG6280-RA	CG6280	0.669858	0.175693	25.3046	23.6395	19.0492	25.0959	24.0164	19.0538	19.1204	22.747	13	13	13	15.4	1093	120895
awd	Nucleoside diphosphate kinase	0.669855	0.735595	21.0135	19.5152	19.3626	19.367	20.7574	21.8677	21.7012	20.1136	3	3	3	24.8	153	17169.9
Rpn10	Regulatory particle non-ATPase 10, isoform B;26S proteasome non-ATPase regulatory subunit 4	0.669098	3.41165	22.6762	22.595	22.1453	22.3786	23.4235	23.7288	23.5256	23.3297	7	7	7	23.5	396	42618.5
Hn	Henna, isoform B;Henna, isoform C;Protein henna	0.668718	0.293602	NaN	NaN	NaN	NaN	16.9819	18.0698	17.8992	NaN	2	2	2	6.5	452	51660.4
Rtf1	RNA polymerase-associated protein Rtf1	0.667413	3.30187	27.1826	28.5698	28.7586	28.9165	27.5995	27.5984	27.7688	27.92	34	34	34	45.3	775	87551.8
Mec2	Mec2	0.667088	0.667999	19.7613	18.5851	19.8958	18.5219	20.6683	21.4934	20.5286	19.5407	14	14	14	47.1	350	38667.5
l(2)k09913	Lethal (2) k09913, isoform D;LD15586p	0.664062	0.814513	21.1939	20.2372	19.759	19.9673	21.3697	21.7268	21.1595	19.8675	3	3	3	7.9	352.5	40362.6
CG17691	CG17691, isoform C	0.663103	0.824105	NaN	17.7117	17.5583	17.5492	18.4699	19.5482	19.8717	19.3969	1	1	1	4.7	364	40266.3
Spn	Spinophilin, isoform S;Spinophilin, isoform I;Spinophilin, isoform B;FI18374p1;Spinophilin, isoform J;Spinophilin, isoform G;Spinophilin, isoform E;Spinophilin, isoform T;Spinophilin, isoform F	0.662408	2.99464	24.3223	25.5051	25.7478	26.1169	25.3255	25.2454	25.3656	25.4715	42	42	42	27.7	2119	230258
l(2)37Cb	LD25692p	0.659593	1.31693	23.6154	25.1736	25.5067	26.0369	23.8022	23.849	23.3102	23.171	23	23	23	26.7	894	102833
ZnT63C	LD22804p;Zinc transporter 63C, isoform F	0.658637	0.398082	NaN	NaN	NaN	NaN	NaN	NaN	NaN	16.1944	1	1	1	4.7	497	54253.2
Pepck	Phosphoenolpyruvate carboxykinase [GTP]	0.658216	2.06263	21.2268	20.1836	19.8232	19.6539	20.4735	21.0898	21.0209	21.0224	4	4	4	8	647	71129.5
Hsp68	Heat shock protein 68	0.656675	1.44693	23.3279	23.6597	23.2999	23.3781	24.0248	24.7733	24.5573	24.0355	22	18	14	42	635	69743.6
CG6712	Probable ribosome production factor 1	0.65626	1.41039	18.4687	19.4824	19.0642	18.8901	18.9788	19.0054	19.6002	19.1003	2	2	2	5.6	394	45999.4
Prp38	GM13395p	0.654367	1.18757	21.0844	21.003	21.8988	21.9509	21.1241	20.6654	20.7015	20.027	4	4	4	14.5	330	40087.6
DIP1	DISCO interacting protein 1, isoform H;DISCO interacting protein 1, isoform E;DISCO interacting protein 1, isoform F;DISCO interacting protein 1, isoform C;DISCO interacting protein 1, isoform B;DISCO interacting protein 1, isoform D	0.653522	0.179048	18.6396	18.0091	NaN	NaN	18.7338	19.5792	18.4096	NaN	1	1	1	3.2	394.5	42895.9
Past1	EH domain containing protein;AT21416p	0.652257	3.0409	24.4139	24.171	23.8996	23.938	25.247	25.3274	25.5088	25.2366	19	19	19	42.3	537	61293
Cat	Catalase	0.651851	3.49217	27.9424	28.2327	28.0115	27.874	28.786	28.9196	28.9997	29.1031	30	30	30	71.7	506	57149.6
MFS3	Major facilitator superfamily transporter 3	0.650639	1.42842	NaN	NaN	NaN	NaN	16.193	16.7316	16.7066	16.1856	2	2	2	3.7	512	55073.8
CG7470	CG7470, isoform A	0.642493	2.22704	26.6887	26.066	26.0749	25.7848	26.5241	27.1849	26.6579	26.5982	26	26	26	36.2	776	84092.2
Psa	Puromycin sensitive aminopeptidase, isoform A;LP21249p;FI19310p1	0.638917	2.56891	22.4184	22.039	22.4053	22.4325	23.8039	23.8885	23.92	23.4364	17	17	17	21.8	1053	120289
CG12119	CG12119, isoform A	0.634904	1.11845	19.575	18.8314	NaN	18.0256	18.8313	19.001	18.8978	18.6143	2	2	2	5	500	56068.2
CG6700	CG6700, isoform A	0.630513	0.524987	NaN	NaN	NaN	17.6898	NaN	NaN	NaN	NaN	1	1	1	2.5	874	99119.8
Sac1	Sac1, isoform B;Phosphatidylinositide phosphatase SAC1	0.62891	0.832516	20.2493	19.93	19.9021	20.1421	20.2674	20.9289	21.6831	20.6511	4	4	4	8.6	592	67767.5
CG10625	CG10625, isoform H;CG10625, isoform B;CG10625, isoform E	0.627861	0.681064	27.4167	25.8154	25.6316	24.8618	26.2797	24.693	25.2408	24.6771	27	27	11	32.5	682	67727.7
Pgi	Glucose-6-phosphate isomerase	0.626305	4.24783	25.5151	25.7588	25.6357	25.6455	26.6583	26.7633	26.6787	26.5816	23	23	23	56.6	558	62339.1
Cpr78Cc	Cuticular protein 78Cc	0.6241	0.616038	22.5993	21.2547	20.935	20.2719	21.1658	21.1514	21.5395	19.8087	1	1	1	10.1	119	12674.1
CG10466	CG10466, isoform A	0.622419	0.495232	17.4667	18.8401	18.9451	19.3211	17.5728	17.757	17.9558	17.6703	1	1	1	8.4	154	17817.4
Cyp12e1	Probable cytochrome P450 12e1, mitochondrial	0.622372	6.04909	18.1079	17.305	17.8302	17.951	18.2351	18.1881	18.1038	18.1862	1	1	1	2.1	522	59684.3
CG31712	UPF0430 protein CG31712;CG31712, isoform B	0.621307	2.43269	23.8535	24.8065	24.9396	25.2113	24.4059	24.2843	23.9028	23.8749	17	17	17	33.4	287	34829.4
CG3036	CG3036, isoform A	0.620613	0.737012	18.008	NaN	NaN	NaN	19.0341	18.8651	18.988	18.1866	2	2	2	5.7	493	53938.9
CG13298	Splicing factor 3B subunit 6-like protein	0.620255	2.01751	21.2313	21.5671	21.6506	21.5256	21.0827	21.2551	20.9718	20.6541	4	4	4	33.1	121	14194.3
Dbp80	DEAD-box helicase Dbp80	0.619085	1.0265	20.4413	20.43	19.8329	20.3903	20.9588	21.4634	21.6195	22.1387	6	6	1	13.5	460	51315.4
Uch-L5	26S proteasome regulatory complex subunit p37A	0.617523	0.973291	21.4665	21.1944	21.2039	20.9063	22.2434	22.8438	21.9208	21.6318	8	8	8	28.4	324	37672.8
Rpn7	26S proteasome non-ATPase regulatory subunit 6	0.61497	1.70843	21.7409	22.173	21.7911	21.9821	23.1777	23.8287	23.3977	22.9755	6	6	6	20.1	389	45381
mRpL3	Mitochondrial ribosomal protein L3	0.614081	0.151793	19.2968	20.5541	19.6009	20.0592	20.1888	19.4058	20.4401	20.6158	4	4	4	14.4	362	40552.6
CG10725	CG10725	0.613256	0.216846	NaN	NaN	NaN	NaN	NaN	NaN	19.723	NaN	2	2	2	8.2	269	30096.2
Ns1	Guanine nucleotide-binding protein-like 3 homolog	0.609265	0.640509	20.3093	20.7167	21.2431	21.3463	21.0107	22.0377	20.9848	19.9199	7	7	7	13.8	581	65984.8
CG33205;CG8154	CG43897, isoform L;CG43897, isoform B;CG43897, isoform K;CG43897, isoform F;CG43897, isoform H;CG43897, isoform A;CG43897, isoform M;CG43897, isoform P;CG43897, isoform E;CG43897, isoform R;CG43897, isoform N	0.608363	0.932355	25.7866	23.5798	23.7171	24.0387	24.7447	24.6885	24.5931	24.7608	4	4	4	14	462	51792.2
up	Upheld, isoform O;Troponin T, skeletal muscle;Upheld, isoform Q;Upheld, isoform P;Upheld, isoform T	0.607342	1.76645	28.1954	27.0262	26.6439	26.259	27.5473	27.3444	27.4628	26.9374	27	27	0	47.1	389	46598.9
Pex3	LD41491p	0.60614	0.566544	18.2555	17.762	17.6666	17.7456	17.9331	17.7485	18.2332	19.5683	3	3	3	7.8	385	43693.1
Sod	Superoxide dismutase [Cu-Zn]	0.606137	1.13463	23.3851	22.891	22.6557	22.5651	23.1214	23.3817	23.3594	23.3651	6	6	6	44.4	160	16538
obst-E	GH01453p	0.60166	0.833963	23.579	22.3203	22.1621	21.7557	23.3059	21.9402	22.7251	21.8137	5	5	5	30.2	242	26268.5
fau	Protein anoxia up-regulated	0.601573	0.322984	19.1907	17.7586	NaN	NaN	18.9191	18.4984	18.6518	NaN	3	2	2	22.7	163	18836.4
TwdlJ	RT03118p	0.599188	0.609252	18.6809	NaN	NaN	NaN	NaN	NaN	NaN	NaN	2	1	1	9.1	274	28703.8
RpLP2	60S acidic ribosomal protein P2	0.59898	0.850839	22.407	22.2245	21.6758	21.2428	21.7468	22.1511	22.7625	21.3456	5	5	5	58.4	113	11757.2
CG6055	CG6055, isoform A	0.59754	0.870964	26.2999	25.1688	24.1049	24.2853	24.7821	23.2728	23.7933	23.7649	11	11	11	62.1	219	24929.8
Sclp	LP11415p;MIP03712p;FI16115p1	0.597365	1.01894	19.3884	18.8263	19.4152	20.4595	21.141	21.9611	22.4861	21.8563	5	5	5	29.3	249	27247.3
Taf2	LD23043p;Transcription initiation factor TFIID subunit 2	0.59716	2.69876	26.4347	27.2292	27.2856	27.622	27.4003	27.4496	27.4033	27.5716	49	49	49	41	1221	139499
CG5210	Chitinase-like protein CG5210	0.590873	0.240991	19.5328	17.9807	19.1977	18.3653	19.8354	19.3437	18.3653	19.1038	4	4	3	10.4	452	50354.4
Acon	Aconitase, isoform B	0.590385	3.63786	26.2175	26.7425	27.3019	27.3536	26.9971	26.9955	27.2234	27.1649	37	37	37	50.6	787	85398.4
CG9853	Golgi to ER traffic protein 4 homolog	0.588392	0.650732	NaN	NaN	NaN	NaN	NaN	NaN	NaN	NaN	1	1	1	5.6	339	38489.7
Rbp1	RNA-binding protein 1	0.587053	0.338261	19.8834	NaN	NaN	NaN	NaN	NaN	NaN	18.2102	4	1	1	33	135	15446.1
sun	Stunted, isoform B;RE19513p	0.586218	0.31421	18.9987	19.3979	19.5154	18.9621	19.2196	19.8827	19.1619	19.4487	1	1	1	26.3	59	6564.97
skap	SkpA associated protein, isoform A;GH10480p	0.585005	4.2417	26.1004	26.6883	26.6926	26.7532	26.774	26.8379	26.8615	27.0113	14	14	14	30.3	502.5	54859.2
fau	Protein anoxia up-regulated	0.58078	2.28557	25.3881	24.8372	24.7438	24.7871	25.2342	24.9235	25.2135	25.2693	8	7	7	84.7	131	14371.4
CG10289	CG10289, isoform B;CG10289, isoform A;CG10289, isoform D	0.577904	0.72279	NaN	16.9483	NaN	16.9679	NaN	NaN	18.3255	NaN	2	2	2	3.8	991	111194
CG9257	CG9257	0.575323	0.61614	NaN	NaN	NaN	NaN	NaN	NaN	NaN	NaN	1	1	1	2.9	347	39253.3
MRP	FI23224p1;Multidrug-Resistance like protein 1, isoform D;Multidrug-Resistance like protein 1, isoform E;Multidrug-Resistance like protein 1, isoform F;Multidrug-Resistance like protein 1, isoform C;Multidrug-Resistance like protein 1, isoform G;Multidrug-Resistance like protein 1, isoform P;Multidrug-Resistance like protein 1, isoform H;Multidrug-Resistance like protein 1, isoform J;Multidrug-Res…	0.568502	0.585969	18.8818	19.698	19.5329	20.2161	21.688	20.8823	21.849	20.1085	8	8	8	7.5	1548	173594
CG4169	AT02348p	0.567039	2.5906	28.2193	28.1001	28.4691	28.5736	28.8646	29.1175	28.9209	29.2705	25	25	25	80.9	440	45415.4
betaTub56D	Tubulin beta-1 chain;Beta-Tubulin at 56D, isoform A;Beta-Tubulin at 56D, isoform C	0.566127	1.94928	30.7162	31.0209	30.922	30.9794	31.5159	31.5657	31.5302	31.8506	29	29	10	74.7	447	50147.3
Aats-arg	Probable arginine--tRNA ligase, cytoplasmic	0.564879	0.840488	20.5179	20.2635	20.2416	20.1746	22.443	22.1493	22.2902	21.1482	6	6	6	9.8	665	75577
Clp	Cleavage and polyadenylation specificity factor subunit 4	0.564124	0.154581	19.0775	20.1745	20.4392	NaN	18.9368	20.2068	19.6411	18.568	2	2	2	9.5	296	33500.2
RpLP1	Ribosomal protein LP1, isoform B;60S acidic ribosomal protein P1	0.56374	1.85203	24.7658	24.9821	24.284	23.4869	24.7518	25.1241	24.8395	24.9151	6	6	6	70.5	112	11512.9
Arp1	Actin-related protein 1	0.562225	0.994443	22.3488	21.2521	21.2316	21.4624	22.0718	22.663	22.8532	22.2986	6	6	6	21.8	376	42719.2
Tm1	Tropomyosin-1, isoforms 9A/A/B	0.558573	1.65054	29.1738	28.1141	28.3533	28.2015	29.3024	28.8624	28.9895	28.6773	41	41	0	71.4	339	39325.2
Nap1	LD21576p	0.558397	2.44963	23.1237	23.3177	23.5612	23.5543	24.0283	24.3963	24.341	24.096	9	9	9	27.3	370	42767.7
or	Adaptor protein complex AP-3 small chain sigma3	0.558375	2.39062	26.8599	27.7532	27.7435	28.0122	27.6237	27.2152	27.3515	27.4626	13	13	13	52.9	191	21710.1
rb	Ruby, isoform A	0.557993	2.52456	27.5006	28.4029	28.4611	28.6384	28.1321	28.1495	28.12	28.1504	52	52	52	47.5	1160	127137
mmy	Mummy, isoform B;LD24639p	0.554575	1.15536	20.0746	20.0037	19.5171	19.691	20.8756	21.1066	21.7921	21.0893	7	7	7	17.4	501.5	56222.9
CG8213	CG8213, isoform B;CG8213, isoform C	0.549672	0.197261	22.9733	18.7542	17.2478	18.8818	20.7147	16.554	16.0805	18.2654	2	2	2	1.9	1683.5	181657
wupA	Troponin I;Wings up A, isoform K	0.548237	1.10577	27.0915	25.2364	25.3294	25.251	26.545	26.2133	26.306	25.7134	18	18	0	53.4	196	23069.7
CG10625	CG10625, isoform J;CG10625, isoform I;CG10625, isoform A	0.548194	0.627753	24.1177	22.7362	22.3202	21.6729	22.1829	20.7789	21.2114	21.3982	18	2	2	33.6	752	78574.8
Rac1	Rac1, isoform B;Ras-related protein Rac1	0.547428	1.33178	20.8887	19.5446	19.6984	18.9799	20.3095	20.1188	20.7963	20.4737	3	3	2	18.8	192	21353.9
Sh3beta	Sh3beta, isoform D;Sh3beta, isoform E;SH3 domain-binding glutamic acid-rich protein homolog;Sh3beta, isoform C	0.547355	0.803265	18.7581	17.1845	17.1658	18.3698	18.4131	19.3589	18.1127	18.4389	2	2	2	12.5	187	20557.5
Cpr72Eb	Cuticular protein 72Eb	0.546503	0.580384	27.5308	26.9062	25.7076	25.2049	25.7769	24.4769	24.11	24.8826	7	7	7	35	217	24162.2
CG4282	CG4282	0.545802	0.490868	NaN	NaN	NaN	NaN	NaN	NaN	NaN	NaN	1	1	1	2.8	652	75232.6
wal	Walrus, isoform A	0.545555	1.34625	26.5438	26.3493	26.5382	26.7011	26.737	27.0419	26.9438	27.5298	18	18	18	73.9	330	34181.3
Got1	Glutamate oxaloacetate transaminase 1, isoform A;Glutamate oxaloacetate transaminase 1, isoform B	0.544667	0.790152	22.7332	21.3754	21.3103	21.6609	21.7516	23.1126	22.899	23.1156	5	5	5	15.1	426.5	47333.4
alphaTub84D;alphaTub84B	Alpha-Tubulin at 84D, isoform B;Tubulin alpha-3 chain;Tubulin alpha-1 chain	0.543202	2.11737	29.7235	30.1695	30.2459	30.4856	30.7678	30.9485	30.9842	31.2953	25	25	10	60.9	450	49890.4
lost	Growl, isoform A;Growl, isoform B	0.541987	1.95066	26.3908	26.2391	26.3309	26.1694	26.9678	26.7959	26.4849	26.7491	32	32	32	57.4	540	59351.7
Cpr62Bc	Cuticular protein 62Bc, isoform A	0.540928	0.322416	25.7475	25.2956	23.493	23.2499	24.9821	22.4461	22.4159	22.0381	5	5	5	32.8	180	18683.7
CG3909	CG3909	0.54083	1.09991	29.2298	30.3441	29.9775	30.0497	29.709	30.1988	29.3216	29.5806	31	31	31	78.2	331	36100.3
tsu	RNA-binding protein 8A	0.540667	2.29145	23.6076	25.0509	25.5068	25.4961	24.2187	24.1903	24.1999	23.7446	9	9	9	50.9	165	19010.1
eIF-4a	Eukaryotic initiation factor 4a, isoform E;Eukaryotic initiation factor 4A	0.540498	1.97166	27.7762	27.4467	27.4758	27.1614	28.1965	28.4792	28.1493	27.8437	22	22	20	54.3	403	45878.6
CstF-50	CstF-50, isoform B;CstF-50, isoform A	0.538227	0.192114	18.713	17.9683	18.5245	18.4664	18.9871	20.1873	20.3646	NaN	2	2	2	9.4	371	40889.3
Lsd-1	Lipid storage droplets surface-binding protein 1	0.535538	2.525	25.8229	26.5425	26.6195	26.9179	27.4133	27.3832	27.4713	27.4243	27	27	3	69.1	365	41336.5
gfzf	GST-containing FLYWCH zinc-finger protein	0.533278	0.69128	18.7233	19.7883	20.2891	20.0917	20.0987	19.8552	21.4292	20.2271	4	4	4	5.6	1045	119284
CG34424	CG34424	0.531305	0.802824	NaN	NaN	19.0124	18.4428	19.2444	19.5757	19.478	18.466	3	3	3	13.9	201	22881.5
CG9527	Acyl-coenzyme A oxidase	0.531069	0.260967	17.4009	NaN	NaN	NaN	17.8533	18.2229	17.5986	NaN	1	1	1	1.8	713.5	80325.6
vkg	Viking, isoform A	0.528302	0.193901	21.1768	18.6606	17.9094	17.6345	21.282	NaN	19.1124	18.2118	3	3	3	1.9	1940	193777
CG4847;CG4847-RD	CG4847, isoform A;CG4847, isoform D	0.527605	0.311702	16.5138	15.3068	NaN	17.0786	NaN	NaN	14.6733	NaN	12	12	12	51	405	42412.7
CG6937	CG6937	0.52518	1.02623	23.2797	23.1082	22.3278	22.8088	22.0675	22.9538	22.556	22.0543	5	5	5	17.7	356	39561.4
CG34247	CG34247	0.524688	1.12225	29.9422	29.9104	28.8945	28.7766	28.865	28.1325	28.5014	28.7369	3	3	3	59	83	9558.89
loj	LD30746p	0.524055	0.361135	NaN	19.8747	NaN	19.5545	20.7293	21.545	22.4766	19.9911	2	2	2	10.1	237	26937.7
CG8289	CG8289, isoform B;CG8289, isoform A	0.523807	1.45549	22.2164	22.4524	22.321	22.1143	22.1116	22.14	21.781	21.5377	8	8	8	21.5	335.5	37318.3
Syf2	Pre-mRNA-splicing factor Syf2	0.521925	1.72451	24.3307	25.5653	25.9375	26.1188	24.791	24.5911	24.0989	24.3097	20	20	20	71.2	226	26536.9
bt	Bent, isoform J;Bent, isoform F;Bent, isoform C;Bent, isoform I;Bent, isoform H	0.521098	0.975202	25.7836	24.0255	23.5932	22.9	25.3725	25.08	25.3014	24.5065	53	53	53	8.1	8648	968164
mask	Ankyrin repeat and KH domain-containing protein mask	0.521072	0.515604	21.1791	21.6516	20.5443	21.1059	21.5861	21.0397	20.9582	22.5454	9	9	9	3.1	4001	423201
CG13065	CG13065	0.520988	0.149777	23.6786	23.2381	21.8851	21.6557	22.0261	21.0255	21.4931	20.1023	2	2	2	20.7	140	13608.9
alphaCOP	Coat protein (Coatomer) alpha, isoform A	0.519226	1.54107	23.2673	22.857	23.242	22.8019	23.9231	24.087	24.4986	23.9874	20	20	20	20.8	1234	139329
Pfrx	6-phosphofructo-2-kinase, isoform A;6-phosphofructo-2-kinase, isoform N;6-phosphofructo 2-kinase/fructose 2,6-bisphosphatase long form	0.517426	0.176507	NaN	NaN	NaN	19.0785	NaN	NaN	19.4947	19.5889	3	3	3	9.1	715	79090.2
CG6306;CG32548-RB	CG32548, isoform C;CG32548, isoform B	0.516918	0.82318	21.2211	16.5418	16.3456	NaN	16.7146	16.2281	17.1079	NaN	1	1	1	5.1	369.5	39582.7
CG1850-RA	CG1850	0.51438	0.935647	35.1083	34.2441	33.7607	33.2418	33.7337	32.7897	32.6189	33.0416	77	77	77	92.1	681	77682.3
CG8036	CG8036, isoform B;CG8036, isoform D	0.513247	1.8636	28.0387	27.834	27.8483	27.3575	28.5743	28.7262	28.8174	28.377	33	33	33	67.9	603	65537.8
D1	D1 chromosomal protein, isoform C;Chromosomal protein D1	0.512913	1.33456	19.3647	19.1936	20.1317	NaN	19.3749	19.1698	19.0254	19.2586	3	3	3	10.7	355	37000.4
Ccp84Ag	Ccp84Ag	0.512093	0.316439	26.301	23.7397	23.2818	22.0911	24.3693	23.3134	25.1812	23.033	8	8	8	60.7	191	19454.3
Edg84A	Pupal cuticle protein Edg-84A	0.506703	0.577338	29.6279	29.4795	28.8338	28.1921	29.1148	27.6571	27.3678	27.7943	15	15	15	61.7	188	20365
Mlc2	Myosin regulatory light chain 2;Myosin light chain 2, isoform B	0.506595	0.409396	27.6885	25.5779	25.1826	24.2844	26.5279	26.3284	26.9149	25.2332	12	12	12	73.9	211.5	22628.2
Rpn1	26S proteasome regulatory complex subunit p97	0.505283	1.97244	21.1637	23.6157	23.4626	23.2196	24.0481	24.2114	24.2837	24.3787	14	14	14	17	919	102278
CG3731	CG3731, isoform A	0.504475	1.91654	23.534	23.5579	23.7005	23.5628	25.1563	24.9124	24.7946	24.7981	16	16	16	43.4	470	51874.1
l(1)G0230	Lethal (1) G0230, isoform A	0.501785	1.21066	23.2043	21.9454	22.2571	21.9223	22.4868	22.8657	22.4925	22.3532	4	4	4	37.6	157	16727.9
CG18769;CG18769-RC	CG18769, isoform E;CG18769, isoform I;CG18769, isoform A;CG18769, isoform G;CG18769, isoform H	0.500145	0.490117	NaN	19.9559	19.7225	20.4263	20.2285	20.635	21.0303	20.5891	5	5	5	20.7	366	42477.7
Tpi	Triosephosphate isomerase	0.499917	0.770536	26.3689	25.674	25.3116	24.6583	26.017	26.6453	26.6679	25.8654	15	15	15	63.2	297.5	32282.5
CG4849	CG4849	0.499822	2.52737	27.9229	28.738	28.6902	28.7776	28.0918	28.1319	27.9672	27.8271	44	44	44	53.9	975	110650
Hsc70-5	Heat shock 70 kDa protein cognate 5	0.498997	1.91301	24.6215	23.9289	24.1504	24.06	24.7714	25.009	24.6462	24.5495	21	20	20	29	686	74066.1
spin	Protein spinster	0.498245	0.452686	16.59	NaN	NaN	NaN	17.5881	18.2513	17.6673	NaN	1	1	1	2	605	65971.7
CG6994	CG32344	0.498	0.266749	NaN	NaN	NaN	NaN	NaN	NaN	NaN	18.5862	1	1	1	1.9	827	93370.3
Glt	Glutactin, isoform D;Glutactin	0.497875	0.751421	25.1321	23.5557	23.2108	22.4241	24.7406	23.6	24.4973	23.4319	19	18	18	25.8	1026	118749
R	Roughened, isoform B;Ras-like protein 3	0.497252	0.427611	24.1733	21.9637	22.1967	22.0842	22.3043	23.3799	22.8621	22.064	5	5	5	30.4	184	20863.1
Aldh	Aldehyde dehydrogenase	0.495797	1.33986	26.3906	26.3569	26.4309	26.0354	26.7437	27.0633	27.3668	26.9576	21	21	21	41	520	57019
BRWD3	BRWD3	0.494118	0.50982	18.7258	18.6728	18.2286	18.4444	19.0416	19.1056	19.0938	17.3367	11	11	11	7.1	2232	248662
RpS15Aa;RpS15Ab	Ribosomal protein S15Aa, isoform F;40S ribosomal protein S15Aa;40S ribosomal protein S15Ab	0.491735	2.76496	25.2757	25.4718	25.4459	25.6923	25.8458	26.1843	25.9504	26.0053	10	10	10	70.8	130	14771.4
CG3446	CG3446, isoform A	0.487988	0.302923	NaN	NaN	NaN	NaN	18.6539	18.649	18.8323	18.5127	3	3	3	16.9	154	17747.6
CG16885	CG16885	0.487923	0.75797	26.3733	25.2809	23.7968	26.4627	24.6768	23.8808	23.9488	24.3452	8	8	8	28.1	270	28734.5
CG34417	CG34417, isoform R;CG34417, isoform T	0.481596	0.688616	23.1436	22.1547	22.6369	22.4084	23.5713	23.1545	23.4069	22.1496	25	25	0	7	5155	577525
CG7993	Ribosome production factor 2 homolog	0.478762	0.805639	21.4069	21.2163	21.1607	20.9496	21.3599	21.701	21.2625	20.8312	5	5	5	20.6	320	36497.7
RpII15	DNA-directed RNA polymerase II subunit RPB9	0.477002	0.831849	21.8851	22.0301	21.6872	21.6728	21.1615	20.9203	21.7789	20.6357	4	4	4	37.2	129	15098
CG13722	CG13722	0.474985	0.774323	27.3197	26.73	26.0393	25.222	25.9328	24.917	25.1481	25.1394	7	7	7	19.1	708	77342.4
mdy	CG31739, isoform A	0.473638	1.29395	21.7424	21.9076	22.0905	21.8488	22.4837	22.5521	22.488	22.2769	9	9	9	12.9	1082	121520
yellow-c	RH54244p	0.472203	0.151905	19.4501	18.6929	NaN	18.3712	19.3612	19.2565	20.6707	18.4381	4	3	3	13.5	438	49245.6
Ns2	Nuclear GTP binding protein	0.470841	0.359394	NaN	NaN	NaN	18.8472	17.6851	19.1913	18.8471	19.2424	1	1	1	2.4	674	76607.5
chm	Chameau, isoform A;Chameau, isoform B	0.46937	0.516507	23.5586	23.5193	23.7078	24.0601	24.016	23.2438	23.1673	22.3017	13	13	13	19.5	757	83385
Prosbeta3	Proteasome subunit beta type-3	0.467168	2.06861	18.2211	18.3212	18.715	19.3393	19.2527	19.5336	19.3499	19.1072	1	1	1	6.8	205	23234
Uch	Ubiquitin carboxy-terminal hydrolase, isoform C;Ubiquitin carboxy-terminal hydrolase, isoform B;Ubiquitin carboxyl-terminal hydrolase	0.466777	0.512868	20.7832	18.4693	18.8328	18.6144	20.0589	21.31	20.648	19.471	2	2	2	13.4	227	25850.2
CG8736	CG8736	0.465837	0.371376	23.7244	22.2815	21.4813	20.3666	20.9877	20.2169	20.3346	19.7075	1	1	1	11	163	17909
Lsp1beta	Larval serum protein 1 beta, isoform B;Larval serum protein 1 beta chain	0.463645	0.609229	24.0629	22.1363	22.8762	22.0003	23.6458	24.1524	24.9016	23.7007	25	23	21	33.6	789	95913.8
Hsc70-4	Heat shock 70 kDa protein cognate 4	0.462585	2.0423	29.6017	29.5137	29.3592	29.2158	29.7645	29.9377	29.5928	29.5439	55	55	45	75.6	651	71131.4
Taf10	Transcription initiation factor TFIID subunit 10	0.462517	1.45646	24.32	25.3358	25.3507	25.5591	25.3105	25.5251	25.3437	25.4133	6	6	6	50.9	167	18520.6
CG5214	CG5214	0.46234	1.71186	24.8953	26.0897	26.3196	26.5374	26.3784	25.9915	25.966	26.5124	15	15	15	33.5	468	49924.1
Cpr49Ah	Cuticular protein 49Ah	0.462295	0.197224	24.057	22.2272	21.3277	21.9541	23.6571	20.25	19.4225	20.9377	4	4	4	18.4	190	21868.1
CG4603-RA;CG4603	CG4603, isoform C;CG4603, isoform B;Ubiquitin thioesterase OTU1	0.462022	1.25918	19.7555	19.4158	19.3632	19.3477	21.0013	20.4009	21.1311	20.7015	2	2	2	11.2	347	37822.5
Srp72	Signal recognition particle subunit SRP72	0.459754	1.32248	22.9683	22.7457	22.937	23.273	23.0696	23.3723	23.4339	23.6776	12	12	12	25.2	650	72851
T-cp1	T-complex protein 1 subunit alpha	0.459185	1.72836	24.7855	24.9326	25.0349	24.8777	26.1461	25.9908	26.3937	25.8719	20	20	20	43.3	557	59557
His1:CG33855;His1;His1:CG33807;His1:CG33834;His1:CG33801	Histone H1	0.456968	1.61651	27.7212	27.2732	26.627	26.4424	26.695	26.697	26.5508	26.2102	12	12	12	39.1	256	26359.4
CG5756	CG5756, isoform B;CG5756, isoform A	0.454722	0.414711	21.1684	17.7963	NaN	NaN	18.7596	17.4767	17.6018	18.0625	2	2	2	4.4	973.5	107589
eIF-2beta	Eukaryotic translation initiation factor 2 subunit 2	0.453392	0.340275	20.5296	21.2883	21.7247	22.2818	22.0408	21.9219	21.0733	22.3405	5	5	5	19.6	312	35217.9
l(3)03670	Lethal (3) 03670	0.453191	1.8231	22.3432	22.0576	22.0928	22.0674	22.9353	22.4936	22.9523	23.0137	13	13	13	68.6	223	24183.5
CG5028-RC;CG5028	CG5028, isoform C;CG5028, isoform D;CG5028, isoform A;CG5028, isoform E	0.449694	1.9086	24.2748	24.4123	24.5692	24.5928	25.0646	25.3378	25.1777	25.4075	13	13	13	43.4	392.5	43294.3
CG13096-RA;CG13096	CG13096, isoform B;Ribosomal L1 domain-containing protein CG13096	0.449319	1.88615	24.1096	23.0222	22.9014	23.1544	22.6276	22.9938	22.7044	22.6369	15	15	15	26.1	681	74364.4
Spn43Aa	Serine protease inhibitor 43Aa	0.447605	1.03113	23.88	23.0475	23.0972	23.166	23.7686	23.5634	23.5821	23.9531	8	8	8	22.6	390	44789.7
gammaTub23C	Tubulin gamma-1 chain	0.445185	0.614497	18.5601	19.4895	18.8909	18.7365	19.5178	20.729	19.891	19.7323	3	3	3	6.7	475	53339.3
GNBP3	Gram-negative bacteria-binding protein 3	0.444947	0.405539	22.9354	22.0216	21.4208	21.1397	21.4496	22.3766	21.3434	20.4904	9	9	9	21.2	490	55211.3
CG13606	CG13606, isoform A;CG13606, isoform B	0.441182	0.368128	21.4582	NaN	16.6243	NaN	NaN	NaN	NaN	16.7333	1	1	1	21.2	116	12363
alpha-Spec	Alpha spectrin, isoform D;Alpha spectrin, isoform C;Alpha spectrin, isoform B;Spectrin alpha chain	0.44083	1.69742	27.6475	27.5347	27.2376	27.1399	27.8591	27.6216	27.8248	27.3826	87	87	87	41.7	2436	280435
GstD1	Glutathione S-transferase 1-1	0.439107	2.10284	26.5074	26.4197	26.1173	26.1001	26.962	27.298	27.1532	27.2023	12	12	11	47.4	209	23866.4
abs	ATP-dependent RNA helicase abstrakt	0.437238	1.82452	25.2885	26.3855	26.3803	26.457	25.4241	25.5038	25.2512	25.4451	31	31	31	50.2	619	69487.8
CG8273	CG8273	0.435498	0.590784	22.8988	23.3827	23.5003	23.9009	23.3785	22.8586	21.8537	22.5652	15	15	15	19	874	97759.8
Mur18B	GH13361p	0.434202	1.0649	19.3846	20.2341	20.9258	19.6799	20.7793	20.9296	21.1207	21.1263	3	3	3	8.7	481	50912.4
fau	Protein anoxia up-regulated	0.432538	0.472562	25.8132	23.4016	23.2406	23.0222	25.3661	25.0484	25.124	23.8167	16	16	15	32.5	619	68642.1
CG8235	CG8235	0.432268	0.55168	19.1342	18.7609	19.291	20.7791	20.2315	20.4453	20.3486	19.3523	3	3	3	14.2	323	34400.9
CG7324	CG7324, isoform B;CG7324, isoform A	0.430865	0.928229	18.2544	NaN	NaN	18.1159	18.3363	18.7497	18.7442	18.9077	2	2	2	2.1	1273.5	145300
uex	Unextended, isoform E	0.430365	0.493938	19.9603	20.0905	20.0509	20.433	19.6537	21.115	21.1127	21.0436	10	10	10	14.3	834	93283.4
sls	Titin;Sallimus, isoform V;Sallimus, isoform T;Sallimus, isoform X;Sallimus, isoform R;Sallimus, isoform Q;Sallimus, isoform P;Sallimus, isoform S;Sallimus, isoform U;Sallimus, isoform Y;Sallimus, isoform D;Sallimus, isoform Z;Sallimus, isoform W	0.42917	1.03836	26.3449	24.8737	24.5833	24.345	26.2935	25.9508	26.2698	25.5599	64	64	61	4.8	16282	1849150
CG6439	CG6439, isoform A	0.427525	2.30098	23.5974	23.8569	23.9398	24.0404	24.7266	24.6901	24.8041	24.6269	12	12	12	38.4	370	40381.5
Lcp65Ag1	Larval cuticle protein 8	0.427368	0.528035	28.774	27.9852	27.6189	27.2016	27.6512	26.3214	26.7139	26.6422	5	5	2	74.3	105	11194.4
Rpt2	26S protease regulatory subunit 4	0.427355	1.56621	24.7392	25.0922	24.546	24.4023	25.7797	25.7459	25.3806	25.3288	19	17	17	50.3	439	49323.6
Mtch	LD43650p	0.426775	0.413873	18.6634	17.6831	17.428	16.8023	17.84	17.7034	17.666	NaN	1	1	1	5.7	316	35011.7
Sec31	Sec31, isoform A;Sec31, isoform B	0.424503	0.791735	20.1164	19.6647	20.7248	19.7964	21.2064	20.3008	20.4111	20.3366	3	3	3	4.5	1240.5	136076
CG1440;CG1440-RC	CG1440, isoform A;AT08049p;CG1440, isoform D	0.421153	1.32209	19.8451	20.3517	19.6902	20.6996	20.8219	21.2687	21.2987	20.899	4	4	4	10.7	511	57760.5
par-1	Par-1, isoform E;Par-1, isoform R;Par-1, isoform T;Par-1, isoform C;Par-1, isoform F;Par-1, isoform G;Par-1, isoform P;Par-1, isoform S;Par-1, isoform L;Par-1, isoform B;PAR-1;Par-1, isoform H	0.419952	1.15902	22.2145	21.6417	22.0633	21.6134	22.855	22.6198	22.1823	22.2631	8	8	8	11.7	1039.5	112935
sel	CG12918	0.419148	0.418321	NaN	18.3511	18.1791	18.2265	18.899	19.8845	19.7774	18.2993	2	2	2	12.7	189	21301.3
CG33332-RA	CG33332	0.417945	0.711063	24.0725	25.1887	24.9433	25.363	24.3631	23.8015	23.2918	24.0868	9	9	9	29.8	349	39475.3
CG10139	CG10139	0.416975	0.57601	20.2533	20.0473	20.1837	21.6226	19.8406	19.979	20.2447	21.2694	5	5	5	26.8	224	25512.9
CG2118	CG2118, isoform A;CG2118, isoform B	0.413347	2.15229	21.0546	21.344	22.1235	22.4351	22.6421	22.5969	22.9764	22.6245	11	11	11	20.3	666	72962.7
Zasp52	PDZ and LIM domain protein Zasp;MIP09364p	0.412443	1.64938	25.1899	24.6177	24.7355	24.433	25.4752	25.3644	25.486	25.121	16	16	16	21.3	890	96009.6
Hsp22	Heat shock protein 22	0.411608	0.865795	22.6608	23.0819	23.1596	22.829	23.7465	23.8002	23.5614	23.6679	7	7	7	46.6	174	19763.3
Gbeta13F	G protein beta-subunit 13F, isoform B;Guanine nucleotide-binding protein subunit beta-1	0.410725	0.272412	22.5095	21.5289	21.5258	20.9776	21.8691	22.1661	24.4599	23.1217	6	6	6	22.9	340	37132.9
Rpd3	Histone deacetylase Rpd3	0.40985	1.55156	22.236	22.5362	22.4215	22.6839	22.38	22.3497	22.5864	22.0853	6	6	6	13.8	521	58330.7
Cdk5	Cyclin-dependent kinase 5 homolog	0.408626	0.148846	19.3056	18.9608	19.4138	NaN	20.0706	20.4142	19.6758	NaN	3	2	2	13.3	294	33180.4
CG12391	CG12391	0.408242	0.24307	19.2979	19.3575	20.0203	20.0204	19.6022	19.936	18.9782	18.9366	3	3	3	8	587	66437.3
CoVa	Cytochrome c oxidase subunit 5A, mitochondrial	0.404953	0.130049	21.6078	20.0457	19.2162	NaN	NaN	20.3722	20.6198	19.6312	2	2	2	24.2	149	16622.1
CG7763	CG7763	0.403275	0.345153	19.6851	19.578	19.431	18.7661	19.6692	21.2135	20.1799	19.099	4	4	4	37.4	187	21399.8
kst	Karst, isoform C;Karst, isoform G;Karst, isoform E;Karst, isoform A;Karst, isoform B	0.401435	0.2532	21.9859	21.7894	21.1314	22.0764	24.2409	23.0521	22.2229	21.3105	14	14	14	4.6	4207	483686
e(y)2	Enhancer of yellow 2 transcription factor	0.399647	0.416588	21.9907	23.1705	23.2723	24.032	22.3454	20.7871	20.7795	21.9064	5	5	5	70.3	101	11474.1
Tm1	RE21974p	0.397403	1.02351	23.7404	24.4035	24.0378	23.7276	23.9238	24.5026	23.858	23.6791	29	4	0	82.1	285	32757.7
Rpn3	Regulatory particle non-ATPase 3, isoform B;Probable 26S proteasome non-ATPase regulatory subunit 3	0.393912	1.60419	22.4369	23.0698	22.6138	22.5589	23.8458	24.2042	24.2819	24.1848	21	21	21	49.2	494	56004.2
e(r)	Protein enhancer of rudimentary	0.393176	0.582435	19.5676	18.6737	19.3681	19.9283	19.336	19.8843	19.3123	18.5428	1	1	1	15.4	104	12187.9
Pdk	Pyruvate dehydrogenase kinase, isoform B;[Pyruvate dehydrogenase (acetyl-transferring)] kinase, mitochondrial	0.392734	0.228143	18.4471	NaN	NaN	18.4221	18.582	19.1583	19.0456	19.4721	2	2	2	4.5	417.5	47107.7
Su(var)3-7	FI20162p1;Protein suppressor of variegation 3-7	0.38959	0.828666	NaN	19.0364	18.6178	18.0747	18.2262	18.3969	18.9878	18.1678	1	1	1	1.4	1249	139890
baf	Barrier to autointegration factor, isoform B;Barrier-to-autointegration factor	0.389325	0.607288	22.1347	22.0577	21.1486	21.2676	21.0606	22.2437	21.7117	20.954	3	3	3	40	90	10116.5
Dgp-1	Dgp-1, isoform A	0.387157	0.66744	19.4487	19.7513	19.2183	19.295	19.1491	19.456	18.9984	19.0491	2	2	2	5.1	669	72501.9
AGBE	CG33138	0.386621	0.115862	18.7926	19.0347	19.0051	18.7631	19.4229	20.4542	20.1342	19.2176	4	4	4	6.4	685	79109.4
Dak1	Dak1, isoform A	0.384603	2.46117	22.6492	22.1303	22.0849	21.7358	22.8002	23.0402	22.9473	22.958	10	10	10	37.5	253	27822.5
CG10932	CG10932, isoform A	0.384586	0.951229	25.4824	25.7116	25.6156	25.6684	26.4191	26.432	26.4135	27.0295	13	13	13	46.3	410	43470
Gpdh	Glycerol 3 phosphate dehydrogenase, isoform E;Glycerol 3 phosphate dehydrogenase, isoform G;FI03663p;Glycerol-3-phosphate dehydrogenase [NAD(+)], cytoplasmic	0.38031	0.743784	25.0311	24.4007	24.0935	23.2964	23.8456	24.4707	24.7433	24.1703	13	13	13	40.3	353	38613.9
eIF6	Eukaryotic translation initiation factor 6	0.38012	0.993509	22.5854	22.0182	22.68	22.0023	22.3512	22.36	21.9063	21.9737	5	5	5	38	245	26494.1
Tctp	Translationally-controlled tumor protein homolog	0.380103	0.869499	25.0935	23.6403	23.1087	22.8713	23.9026	24.3368	24.2356	23.6695	8	8	8	45.3	172	19637.4
Hel25E	ATP-dependent RNA helicase WM6;Helicase at 25E, isoform D	0.378458	1.86703	22.6956	23.5929	23.7207	24.0505	24.5213	24.8911	24.7747	24.6837	12	12	12	38.2	364.5	41649.4
Sc2	Sc2	0.377525	1.28919	24.2101	24.233	24.2326	24.6146	25.3838	24.978	25.1127	24.97	8	8	8	22.2	302	34185
CG30069	CG30069	0.374007	0.563203	23.4543	23.0699	22.8856	22.642	23.1543	22.6728	22.3284	21.7728	20	20	20	10.6	4012	460959
scu	3-hydroxyacyl-CoA dehydrogenase type-2	0.37338	0.887974	25.5873	25.6467	25.5374	25.5344	25.7683	26.3973	26.2528	26.2044	11	11	11	67.8	255	26905
CG32409	CG32409	0.37127	1.11733	21.5107	21.2956	21.0266	21.2147	21.4604	21.522	21.088	20.9102	5	5	5	21.5	349	39454.6
bor	AAA family protein Bor	0.368859	2.20544	23.7599	24.2521	24.3935	24.4701	25.4513	25.2157	25.1431	25.3518	20	20	20	37.3	604	68360.8
cher	Cheerio, isoform G;Filamin-A;Cheerio, isoform H;Cheerio, isoform F	0.368425	0.899675	27.3594	25.7503	25.8166	25.441	26.821	26.9749	26.8573	26.3801	55	55	13	30.6	1564.5	169569
CG11905	CG11905, isoform B;CG11905, isoform L	0.367253	0.496431	29.0048	28.6493	27.6852	27.0135	27.3866	26.5175	26.2077	26.6331	17	17	17	49.6	403.5	43194.5
Vap-33A	VAMP-associated protein of 33kDa ortholog A, isoform A;LD30122p	0.36711	0.856863	25.7321	26.0664	26.0319	26.0482	26.4665	26.5427	26.6816	27.3498	8	8	8	40.9	252	28124.3
beta'Cop	Coatomer subunit beta'	0.367057	1.73928	23.7009	23.3343	23.7092	23.5877	24.1111	24.4738	24.3608	23.9998	16	16	16	22.2	914	102713
Lsp2	Larval serum protein 2, isoform B;Larval serum protein 2	0.366778	0.970035	27.0717	25.8383	25.7791	24.9811	26.9795	26.6399	27.0926	26.627	26	26	26	38.2	701	83348.5
26-29-p	26-29kD-proteinase	0.363793	0.682858	24.6903	24.3008	24.0987	23.9072	24.6842	25.2576	24.9657	24.1222	10	10	10	20.8	549	62129.9
Bin1	Histone deacetylase complex subunit SAP18	0.363001	1.13917	25.3364	26.1305	26.0843	26.1565	25.1243	25.2182	24.7933	24.5927	9	9	9	61.3	150	17287.7
zip	Zipper, isoform C;Zipper, isoform D	0.361905	1.74632	29.0261	28.5317	28.506	27.9685	28.783	28.7728	29.0141	28.5781	111	111	4	53.9	1993.5	229497
CG1677	CG1677, isoform D	0.361395	0.328819	20.2413	21.0239	21.4933	21.6289	19.6394	19.6966	20.7748	19.454	44	2	2	46.1	999	108982
shi	Shibire, isoform C;Shibire, isoform O;Shibire, isoform M;Shibire, isoform F;Shibire, isoform P;Shibire, isoform L;Shibire, isoform N;Dynamin	0.360609	0.312495	19.611	19.0381	18.9226	19.1614	20.2267	21.4384	21.0282	19.5151	5	5	5	7.6	877	97809.3
bnb	Protein bangles and beads	0.360564	0.101304	24.2185	23.1586	22.6659	22.4379	26.852	21.3949	21.3572	22.4601	18	18	18	68.8	442	45815.9
Ccp84Aa	Ccp84Aa	0.36047	0.352773	28.7843	28.0771	27.3536	26.6005	27.7195	26.451	26.0475	25.8508	16	16	3	75.1	205	21416.4
Tm2	Tropomyosin-2	0.35758	0.704727	28.764	27.9674	27.8211	27.7389	28.7727	28.2592	28.2513	27.9352	35	33	33	78.2	284	32893.7
Srp54k	BcDNA.GM09489	0.356702	0.986378	NaN	19.8325	19.6366	NaN	20.2636	20.5321	20.178	19.779	3	3	3	7.3	508	55865.9
Spn100A	CG1342	0.356062	0.776039	21.1211	21.3258	20.6468	21.0188	22.008	22.0346	21.9451	21.4112	4	4	4	4.6	649	72745.4
pod1	Coronin	0.355172	0.770996	22.2445	21.608	21.0136	21.7032	22.8394	22.8347	22.3511	22.1859	11	11	11	14.3	1255	139073
Fbp2	Fat body protein 2;Fat body protein 2, isoform B	0.354895	0.50776	23.3952	23.3596	23.3097	22.7412	24.9634	24.8319	25.3144	24.3496	12	12	12	38.7	256	29006.3
CG40042	CG40042	0.350708	0.471991	19.6504	19.6796	20.1332	20.5024	21.7411	21.6545	21.5983	20.666	3	3	3	18.4	206	22138
MP1	BcDNA.GH02921;Melanization protease 1, isoform C	0.349775	0.706331	19.6129	19.7879	19.5487	19.3784	21.2636	20.6169	21.1659	20.5442	2	2	2	5.4	394.5	44140.6
ctrip	CG42574	0.349632	0.16277	17.6817	NaN	NaN	NaN	17.871	17.6769	17.9671	NaN	2	2	2	0.9	3140	336576
dj-1beta	DJ-1 beta	0.348963	0.360008	19.9179	19.5688	19.1836	19.938	21.0519	19.6118	19.6103	21.0401	2	2	2	11.7	205	21436.7
FK506-bp1	39 kDa FK506-binding nuclear protein	0.34613	0.671752	26.1275	26.1668	25.7123	25.4012	25.8123	25.4464	24.9451	24.781	19	19	19	40.6	357	39343.5
coil	Coilin, isoform D;Coilin, isoform C	0.345947	0.593248	18.6249	19.7072	19.715	20.1057	19.2938	19.1916	19.4646	19.3338	3	3	3	6.6	561	62203.7
Gale	UDP-galactose 4'-epimerase, isoform B;Probable UDP-glucose 4-epimerase	0.345195	0.366638	21.43	21.2976	21.4081	21.3091	21.1997	22.4549	22.4965	22.0809	7	7	7	26	350	38696.8
EG:BACR19J1.2;CG5254	CG5254, isoform A;CG5254, isoform B	0.344303	0.537672	21.5597	22.2681	21.9137	21.9015	21.9814	22.7557	23.1494	22.8869	6	6	6	18.6	271.5	29948
CHOp24	CHOp24, isoform A	0.343807	0.214072	NaN	17.8823	17.3013	16.5549	19.1864	19.8076	18.7399	18.6799	2	2	2	10.1	208	23263.6
CG2982	CG2982, isoform B;Bifunctional lysine-specific demethylase and histidyl-hydroxylase NO66	0.343668	0.324898	23.6059	23.1197	23.9839	23.7142	23.7869	23.3112	21.9175	23.7169	6	6	6	15	653	73098
BcDNA.GH04978;CG7028	BcDNA.GH04978;CG7028, isoform C;CG7028, isoform D;CG7028, isoform B	0.341622	1.69454	26.7226	28.0165	28.2535	28.582	27.1411	27.2232	27.2643	27.0892	23	23	23	31.8	909	104270
mago	Protein mago nashi	0.340595	1.25275	22.9286	24.7845	25.0837	25.2514	23.468	23.6485	23.2544	23.7906	11	11	11	77.6	147	17310.8
raptor	Raptor, isoform B	0.34007	1.06633	18.2227	18.2862	18.2576	18.7009	18.7274	18.698	18.334	19.0756	2	2	2	2	1621	177182
sea	CG6782, isoform A	0.339304	0.473935	22.7398	23.343	23.3204	23.3669	23.9351	24.3827	24.7706	24.7922	10	10	10	31.2	317	34093.6
CG15717	CG15717, isoform A	0.337785	0.400532	20.4085	20.7425	20.4889	20.5994	21.9226	22.2534	22.264	21.0656	5	5	5	28.6	252	27766.6
CG34417	CG34417, isoform Y;CG34417, isoform K;CG34417, isoform V;CG34417, isoform D;CG34417, isoform S;CG34417, isoform I;CG34417, isoform O;CG34417, isoform M;CG34417, isoform Q;CG34417, isoform F;CG34417, isoform C	0.336288	0.21486	19.5394	18.4036	18.4888	18.3408	NaN	18.5357	18.1604	19.6028	25	1	0	12.2	3246	363925
Rpt3	26S proteasome regulatory complex subunit p48A	0.332138	1.83377	24.1844	24.7054	24.584	24.5584	25.1565	25.2744	25.1275	25.2919	24	24	23	68.3	413	46998.7
Rab1	FI01544p	0.330439	1.01735	23.8425	22.5594	23.1642	22.6325	23.5002	23.9687	24.1355	23.5516	5	5	3	29.3	205	22762.7
Kap-alpha3	Importin subunit alpha	0.329558	0.880793	24.1458	22.9036	23.2551	23.0414	24.3861	23.6942	24.3578	23.9496	5	5	5	14.2	514	56990
Gfat1	Glutamine:fructose-6-phosphate aminotransferase 1, isoform H;Glutamine:fructose-6-phosphate aminotransferase 1, isoform M;Glutamine:fructose-6-phosphate aminotransferase 1, isoform D;Glutamine:fructose-6-phosphate aminotransferase 1, isoform L;Glutamine:fructose-6-phosphate aminotransferase 1, isoform A;Glutamine:fructose-6-phosphate aminotransferase 1, isoform J;FI13081p;Glutamine:fructose-6-pho…	0.32642	1.12024	22.6262	23.0187	22.8106	22.9254	23.3181	23.3817	23.8407	23.4949	13	13	10	24.7	669	75208.6
Fib	rRNA 2'-O-methyltransferase fibrillarin	0.326033	1.14505	26.1437	25.8137	25.7197	25.4743	25.7308	25.8182	25.5974	25.2453	15	15	15	50	344	34636.9
Rab5	Drab5	0.324962	0.567635	21.6521	21.2995	22.058	22.0901	22.3352	23.1276	23.0294	23.3752	5	5	5	28.3	219	23959
Fer1HCH	Ferritin 1 heavy chain homologue, isoform A	0.323777	0.358531	23.9888	24.3531	24.7584	24.9004	24.3884	24.6793	25.5312	25.2757	6	6	6	36.6	205	23145.6
Nup153	Nucleoporin 153kD, isoform D;Nuclear pore complex protein Nup153	0.322522	1.00862	21.5587	20.9691	20.6725	20.3012	21.0529	20.9525	21.1568	20.4309	3	3	3	2.8	1906	198911
CG6512	CG6512, isoform B;CG6512, isoform A	0.318889	0.741302	NaN	NaN	18.1718	18.1366	19.6896	19.3085	19.054	19.4559	2	2	2	2.9	761.5	82883.8
CG15545-RA	CG15545	0.318785	0.321947	23.0002	20.6455	19.916	21.266	21.9701	20.9131	20.6996	20.8167	4	4	4	10.3	358	40334.1
su(w[a])	Suppressor of white-apricot, isoform K;Protein suppressor of white apricot;Suppressor of white-apricot, isoform M;Suppressor of white-apricot, isoform J;Suppressor of white-apricot, isoform I;Suppressor of white-apricot, isoform G;white apricot	0.31862	0.349303	19.4191	22.7868	22.9638	23.1233	21.7341	21.0473	21.2691	22.1744	10	10	10	15.2	748	82692.8
Rack1	Receptor of activated protein kinase C 1, isoform C;Guanine nucleotide-binding protein subunit beta-like protein	0.31655	1.10688	25.3116	25.1135	24.7245	24.7307	25.4326	25.6538	25.0263	25.3208	15	14	14	50.9	318	35618
eIF4AIII	FI20117p1	0.31609	0.888918	24.6995	25.0639	25.6769	25.9036	24.7317	24.5067	24.5757	24.1506	14	12	12	35.8	399	45644.7
Gs2	Glutamine synthetase 2, isoform E;Glutamine synthetase 2, isoform D;Glutamine synthetase 2 cytoplasmic	0.314764	0.331652	21.377	20.6519	NaN	21.4127	21.4189	22.7556	21.4739	22.2974	15	1	1	48.8	369	41304.3
Aats-val	Valyl-tRNA synthetase, isoform A	0.314451	0.123219	19.3076	NaN	19.4894	19.6285	19.6321	19.8815	19.9708	20.4352	2	2	2	3	1049	118254
Cwc25	Cwc25	0.311105	1.09302	25.4861	25.9307	26.1279	26.4216	25.3425	25.2861	25.1588	24.7652	28	28	28	41.7	521	61877.2
Prosalpha7	Proteasome subunit alpha type-3	0.309787	0.576021	20.7158	20.9575	20.7206	20.1067	21.8544	22.2686	22.9384	21.9948	4	4	4	21.7	253	27675.3
Cpr72Ea	Cuticular protein 72Ea	0.307452	0.37602	32.2144	31.6922	31.2589	30.4787	31.0681	29.7205	29.6304	30.3186	15	15	15	37.8	341	37495.4
mbf1	Multiprotein Bridging Factor 1;Multiprotein bridging factor 1, isoform E	0.307408	0.638642	22.4133	22.1308	22.0505	22.0857	22.3693	21.8521	21.8263	22.1472	7	7	7	43.4	166.5	18199.2
rhea	Rhea, isoform H;Rhea, isoform B;Rhea, isoform G;Rhea, isoform C	0.306947	0.42324	23.3492	20.9417	21.4322	20.7311	22.0714	22.6643	22.8985	21.8444	14	14	14	7.1	2752	298104
for	cGMP-dependent protein kinase, isozyme 2 forms cD4/T1/T3A/T3B	0.304837	1.52694	23.4694	22.5955	22.9281	23.3842	23.6525	23.7074	23.6733	23.4439	10	10	4	14.9	830.5	92791.7
BCAS2	CG4980	0.303508	1.28798	26.1721	27.2661	27.4642	27.6155	26.4726	26.2236	26.3298	26.6747	10	10	10	44.6	278	31341.6
Flo-1	Flotillin-1	0.29682	0.113898	NaN	NaN	15.6179	14.9129	NaN	NaN	NaN	NaN	20	1	1	49.5	430	47522.6
ND75	NADH:ubiquinone reductase 75kD subunit, isoform B;NADH-ubiquinone oxidoreductase 75 kDa subunit, mitochondrial	0.295525	1.61973	22.5116	22.3279	22.2741	22.0959	22.951	23.3268	23.214	23.0216	13	13	13	25.4	731	78630.3
HmgZ	High mobility group protein Z	0.294686	0.0844415	19.5102	19.1445	19.0132	19.2858	19.5983	19.5805	NaN	17.7077	4	4	4	37.8	111	12656.3
ImpL3	L-lactate dehydrogenase	0.289141	0.832031	26.3577	26.2718	26.2715	26.3185	27.2051	27.2302	26.8599	27.4704	11	11	11	52.7	332	35536.9
hyd	E3 ubiquitin-protein ligase hyd	0.286772	0.479026	20.2778	21.3785	21.1115	21.0712	21.3927	21.3552	22.1104	22.0392	9	9	9	4.1	2885	318881
bel	ATP-dependent RNA helicase bel	0.285512	0.933264	26.319	25.8277	25.7643	25.4228	26.0367	25.9727	25.8764	25.5661	32	31	31	50.5	798	85081.1
ATPsyn-gamma	ATP synthase subunit gamma, mitochondrial	0.285015	1.91925	24.6352	24.234	24.0849	23.9754	24.6448	24.8214	24.8731	24.6803	14	14	14	49.5	297	32871.2
Galphao	G protein alpha o subunit	0.284202	0.928106	20.8865	20.9172	21.2064	21.5813	22.7909	22.5452	22.4951	22.6167	6	6	5	15.8	354	40506.5
Nurf-38	Nucleosome remodeling factor-38kD, isoform B;Inorganic pyrophosphatase	0.282912	1.03884	25.0771	24.9713	24.7788	24.6717	25.3714	25.3719	25.1217	24.8193	13	13	13	65.2	314	35292.6
Aac11	Apoptosis inhibitor 5 homolog	0.282465	0.26697	22.1492	21.1744	20.0794	19.8721	20.5764	20.9181	20.0979	20.4417	2	2	2	4.1	536	59930.1
Cul3	Cullin-3, isoform C;Cullin-3, isoform F	0.279591	2.18587	20.685	20.8511	20.6049	20.3707	21.4582	21.5012	21.3351	21.3766	5	5	5	8.9	853.5	98205.8
CG8258	CG8258	0.27843	0.553145	23.5492	23.7736	23.3605	23.1504	24.363	24.9297	25.0419	24.2487	21	21	21	41	546	59433.1
obst-B	BcDNA.GH02976	0.278152	0.432593	19.714	18.4533	18.3667	18.5466	19.7242	18.8337	18.8326	19.502	3	3	3	11.9	337	38165
CG9510	CG9510, isoform B	0.276257	0.305054	21.5506	20.8554	21.1729	21.0301	21.3409	21.7581	22.3652	21.0915	6	6	6	13.6	469	52205.6
spt4	Transcription elongation factor SPT4	0.275525	0.262409	19.8921	20.5661	20.7383	21.7696	20.4702	20.7885	21.1367	21.7652	2	2	2	22.4	116	13332.1
CG13059	CG13059	0.27528	0.615628	21.8644	18.809	18.6141	18.6516	18.8837	18.0001	18.2618	18.5889	2	2	2	27.1	155	15844
RpS20	40S ribosomal protein S20	0.274885	0.554944	26.3294	26.2073	26.253	26.296	27.2069	26.6038	26.7806	26.1169	8	8	8	60.8	120	13487.7
PP2A-B'	PP2A-B', isoform C;PP2A-B', isoform K;PP2A-B', isoform D;PP2A-B', isoform J;PP2A-B', isoform I;LD29902p;PP2A-B', isoform B	0.274656	0.165598	18.2428	18.3699	18.9877	18.7949	18.8671	19.1365	18.9573	18.923	2	2	2	4.9	670	75267.4
CG17514	CG17514, isoform A	0.274642	0.658901	22.2208	22.2522	22.0666	22.4138	22.8844	23.1297	23.0208	22.3508	17	17	17	7.9	2630	293910
Spat	Serine--pyruvate aminotransferase	0.273588	0.136101	19.3965	19.8474	19.5343	19.7829	18.2912	19.6388	19.3622	19.5276	2	2	2	6.9	394	43799.8
Rpt1	26S proteasome regulatory complex subunit p48B	0.27334	2.07137	23.7889	24.0907	23.746	23.7115	24.7532	24.8209	24.7377	24.6754	17	16	16	36.5	433	48541.7
Top2	DNA topoisomerase 2	0.272565	0.768542	25.0655	24.6839	24.8086	24.8977	24.2749	24.5506	24.6863	24.2662	32	32	32	24.7	1447	164396
CG2199	CG2199, isoform C;Zinc finger protein CG2199	0.271945	0.431754	21.7502	21.9369	21.2455	21.7853	21.8439	21.7012	21.4049	20.6731	7	7	7	14.6	724	80904.5
Osi3	FI03378p	0.271617	0.279476	20.3112	18.8976	NaN	20.5862	21.2666	21.3368	21.204	21.4101	4	4	4	17.4	288	32005.3
nst	LD02044p	0.270408	0.29789	19.7173	17.2224	18.5324	17.5041	19.2084	18.6958	19.2113	18.1489	1	1	1	2.4	549	60581
Nat1	NAT1 ortholog, isoform A	0.270364	2.42743	20.8178	21.1844	21.4466	21.6343	22.7904	22.8959	22.9032	22.7817	15	15	15	19.8	890	103092
CG11905	CG11905, isoform A	0.265617	0.136344	NaN	NaN	NaN	NaN	NaN	NaN	NaN	NaN	2	2	2	3.6	607	65947.8
Tango7	Eukaryotic translation initiation factor 3 subunit M	0.26499	1.68752	24.2981	24.4316	24.5959	23.9371	24.9585	24.7607	24.874	25.0122	8	8	8	27.1	387	44086.8
Nop60B	Nucleolar protein at 60B, isoform C;H/ACA ribonucleoprotein complex subunit 4	0.26338	0.700165	26.5744	27.3231	27.6371	27.7105	27.2163	27.0225	27.66	27.3192	35	35	35	63	508	56830.6
l(1)G0232	Lethal (1) G0232, isoform D;Lethal (1) G0232, isoform F;Lethal (1) G0232, isoform G;LD30065p;LP18470p;LD27988p	0.26022	0.100306	NaN	18.2663	18.2964	17.9308	NaN	NaN	NaN	18.7964	1	1	1	4.8	793.5	85326.1
ck-RA;ck	Crinkled, isoform C;Myosin-VIIa	0.259988	1.02649	21.7722	21.5775	21.0314	21.397	21.1718	21.1742	21.22	21.0719	9	9	9	5.1	2167	250309
Rpt6	26S protease regulatory subunit 8	0.259065	2.00913	24.3019	24.5369	24.6857	24.8675	25.4735	25.6358	25.3743	25.4863	19	17	17	53.6	405	45857.4
RpS12	40S ribosomal protein S12	0.2589	0.355829	21.8676	21.1966	20.8896	20.1628	20.8057	21.7042	21.8868	21.4433	3	3	3	34.5	139	15168.6
Fer2LCH	AT19513p	0.258148	0.390544	25.4728	26.5028	26.4891	26.6238	26.0481	26.2551	27.0157	26.7806	14	14	14	70.5	227	25242.3
Pglym78	GH13304p	0.257505	0.287395	26.0714	24.836	24.588	23.9977	25.1008	25.6543	25.8882	25.0973	13	13	13	58	255	28572.6
Fit1	Unc-112-related protein	0.255105	0.380985	22.9834	22.0375	23.0284	22.9267	23.2713	23.8359	23.7147	22.9965	8	8	8	16.2	708	80496.6
CG8108	CG8108, isoform A	0.25199	0.752546	24.727	24.7611	24.851	24.9503	24.589	24.5116	24.2633	24.1777	23	23	23	27.9	919	102949
AkhR	Adipokinetic hormone receptor, isoform A;Adipokinetic hormone receptor, isoform C	0.251166	0.162847	NaN	NaN	NaN	NaN	17.8356	NaN	17.7257	17.7437	1	1	1	2.3	449	50806.8
Cpr92A	Cuticular protein 92A	0.246636	0.191803	NaN	NaN	NaN	17.5222	NaN	NaN	16.8347	NaN	1	1	1	6.1	245	25308.8
Cpr47Ee	Cuticular protein 47Ee	0.246129	0.220067	20.8639	16.6348	21.0739	NaN	NaN	NaN	16.9949	NaN	2	2	2	8.9	369	41720.9
CG10324-RA	CG10324	0.242043	0.704395	26.9286	28.209	28.2345	28.3149	26.8012	26.8298	26.4637	26.4949	24	24	24	50.1	543	61871.4
Cpr57A	Cuticular protein 57A, isoform A	0.241123	0.163534	25.008	23.489	22.3765	22.0203	23.9764	22.4127	22.5305	21.5267	8	8	8	62	184	19839.1
Parp	Poly [ADP-ribose] polymerase	0.241039	0.111747	NaN	17.5616	NaN	17.4868	17.9171	17.2373	16.5321	NaN	2	2	2	3.6	803.5	91873.9
Khc	Kinesin heavy chain	0.24023	0.850149	23.9262	23.8593	23.9875	24.1128	24.5619	24.8041	25.0219	24.3968	29	29	29	35.6	975	110399
His2Av	Histone H2A.v	0.24016	1.16074	28.2031	28.5394	28.4208	28.3619	28.129	28.0188	27.9723	27.9273	13	13	11	66.7	141	14981.3
wus	LD21896p	0.239105	0.0918954	18.6699	19.1997	19.2212	19.9243	19.1813	19.2006	19.0979	19.6125	2	2	2	6.2	406	46140.8
Rpn2	26S proteasome non-ATPase regulatory subunit 1	0.238617	0.858641	23.5602	23.3229	23.3851	23.6092	24.0377	24.5296	24.4037	23.9646	18	18	18	24.3	983	109004
Mlp84B	Muscle LIM protein at 84B, isoform B;Muscle LIM protein Mlp84B	0.238035	1.60975	26.1261	25.7915	25.4898	25.7595	25.9257	26.2144	25.9024	26.0946	19	19	18	48.9	495	53525.5
CG10732	CG10732, isoform D;CG10732, isoform C;CG10732, isoform A;CG10732, isoform B	0.237408	0.342775	21.5991	21.792	21.3022	21.9399	21.4689	21.6129	21.0825	21.9042	7	7	7	5.9	1625	180537
Ctr1B	Copper transporter 1B	0.236561	0.149133	NaN	NaN	15.4034	NaN	15.4558	15.5406	NaN	15.3826	1	1	1	5.7	174	19777
CG5177	Trehalose 6-phosphate phosphatase	0.23592	0.244882	26.5581	25.0702	24.8511	24.4081	25.6831	26.2273	26.2772	25.9323	22	22	22	76.1	276	31253.2
BG:DS02740.2	AT12460p	0.233965	0.444777	22.7297	23.6275	23.7547	23.744	22.8445	22.8803	22.9555	22.2536	14	14	14	51.3	308	34050.3
CG2233	CG2233	0.233732	0.583633	24.5945	23.8082	23.6633	23.1453	23.9407	24.5422	24.0184	23.7044	10	10	10	25.8	414	46509.2
Gnf1	Replication factor C subunit 1	0.232676	0.320606	19.5704	19.5476	20.0567	19.8275	19.7169	20.1924	20.0135	20.0877	3	3	3	4.1	986	108615
CG7668-RA	CG7668, isoform A	0.23172	0.65859	21.3064	21.5399	21.1551	21.5856	21.7735	21.9938	21.7655	21.9885	7	7	7	20.1	422	47993.4
Tsf1	Transferrin 1, isoform A	0.228905	0.276967	21.7229	21.1267	21.5277	20.3061	23.0926	22.4299	21.7582	21.8778	12	12	12	24.6	641	71811.5
AMPdeam	AMP deaminase, isoform E;AMP deaminase, isoform G;AMP deaminase, isoform J;AMP deaminase, isoform L;AMP deaminase, isoform H;AMP deaminase, isoform K;AMP deaminase, isoform I;AMP deaminase, isoform F;AMP deaminase, isoform C	0.22865	0.631796	20.8382	20.3487	20.0213	20.3668	21.5885	21.0996	21.687	21.4005	6	5	5	8.9	774	89351.4
larp	La-related protein 1	0.227717	0.377081	21.9058	21.6189	21.5199	21.0887	22.3775	21.8797	21.924	21.3069	9	9	9	8.2	1403	150937
Act57B	Actin 57B, isoform C;Actin-57B	0.226585	1.40219	30.9506	30.3106	30.1431	29.969	30.8273	30.7274	31.0481	30.7119	28	28	2	66.1	368	41046.5
Srp54	LD29830p	0.226353	0.526518	25.7679	26.3218	26.2904	26.497	25.481	25.9073	26.1646	25.5892	19	19	19	44.4	513	58365.9
Scsalpha	Succinyl coenzyme A synthetase alpha subunit, isoform B;Succinyl-CoA ligase [ADP/GDP-forming] subunit alpha, mitochondrial	0.226147	0.998258	25.411	25.1328	25.5936	25.4416	25.4659	25.5169	25.6025	25.27	19	19	19	52.4	328	34389
Dp1	Dodeca-satellite-binding protein 1, isoform A	0.224421	1.74805	26.5617	26.6956	26.2338	26.3122	26.9917	27.1692	26.9403	27.0001	50	50	50	41	1301	144276
CG9399	CG9399, isoform A	0.22308	0.397003	17.8753	17.9717	17.614	17.3171	19.0034	18.9881	18.7571	18.7132	1	1	1	7.8	154	16582.4
Pros35-RA;Prosalpha6	Proteasome subunit alpha type;Proteasome subunit alpha type-1	0.220198	0.79794	21.4878	20.6371	21.0013	20.9717	22.0978	22.5399	22.0609	21.9593	6	6	6	29.7	279	31058.7
Vap-33B	LP10490p;VAMP-associated protein of 33kDa ortholog B, isoform B;GH09028p;VAMP-associated protein of 33kDa ortholog B, isoform D;VAMP-associated protein of 33kDa ortholog B, isoform F	0.21686	0.857384	19.4857	18.7484	18.7339	19.1597	19.4533	19.3816	19.5466	19.2244	3	3	3	15	240	26421.3
g	AP-3 complex subunit delta;Garnet, isoform D;Garnet, isoform F	0.216467	1.20763	28.4694	29.6419	29.4992	29.9181	29.4551	29.4692	29.5573	29.7338	37	37	37	39.6	1033	114694
lolal	Lola like, isoform E;Longitudinals lacking protein-like	0.214661	0.773726	18.1762	19.4816	19.0303	19.3222	18.9075	19.3823	19.1497	19.1334	4	4	4	29.1	127	14488.7
Nop56	FI04781p	0.214477	0.406633	22.3791	22.0348	22.4401	22.1963	22.549	21.9955	22.7263	21.8421	5	5	5	11.9	496	54837.3
eIF-3p40	Eukaryotic translation initiation factor 3 subunit H	0.21394	0.548305	23.525	22.5133	22.669	22.7024	23.2031	23.5896	23.7421	23.9341	10	10	10	40.8	338	38407.7
Mf	Mf5 protein	0.211615	0.304564	28.439	27.0155	26.452	26.051	27.7067	27.3439	27.7056	26.9536	28	28	4	73.4	365	41666.7
HmgD	CG17950-PA;High mobility group protein D	0.211275	0.409207	18.1001	17.8889	17.4788	17.8267	18.1002	17.8448	18.7073	18.3707	3	3	3	30.4	112	12415.9
Rab11	Drab11	0.20985	0.222242	21.2829	NaN	19.3549	19.2032	20.435	21.305	19.7212	20.0171	5	5	5	24.3	214	24245.4
Trip1	Eukaryotic translation initiation factor 3 subunit I	0.206687	0.622278	25.451	25.358	25.7293	25.5762	26.272	26.34	26.0756	25.8902	22	22	22	76.1	326	36159.5
Uev1A	LD28904p	0.205969	0.193705	22.5537	21.6694	22.0272	21.6507	22.0005	22.8013	23.6574	22.0554	3	3	3	26.2	145	16669.1
Prat2	Amidophosphoribosyltransferase	0.204515	0.428211	20.322	19.7652	19.3685	19.5508	20.4927	20.966	20.9712	21.013	4	4	4	11.7	508.5	55374.4
CG2469	CG2469, isoform A	0.20344	0.647835	30.1162	31.0024	30.9514	30.9873	30.609	30.9854	30.4677	30.3998	79	79	79	63	1150	130472
Pp2A-29B;Pp2A-29B-RC	Protein phosphatase 2A at 29B, isoform C;Serine/threonine-protein phosphatase PP2A 65 kDa regulatory subunit;Protein phosphatase 2A at 29B, isoform D;MIP33436p1	0.20121	0.575474	24.5322	24.9405	24.8634	24.4718	25.4364	25.3458	25.1075	25.4331	15	15	15	33.2	620.5	68635.1
CG4586	Acyl-coenzyme A oxidase	0.196503	0.249153	19.9836	19.8573	20.2775	19.6077	20.4021	21.4675	21.9073	21.0813	7	7	7	14.8	677	76603.3
Elf	Ef1alpha-like factor, isoform A;Ef1alpha-like factor, isoform C	0.193435	0.667296	22.5306	22.2606	21.9104	22.2455	23.0958	23.2656	23.0808	22.7024	9	9	9	16	557	60869.9
Ef1alpha48D	Elongation factor 1-alpha 1	0.19292	1.11316	31.1982	30.6598	30.8504	30.6726	31.3945	31.2055	31.2369	31.517	28	28	11	67.2	463	50307
l(1)10Bb	L(1)10Bb	0.192297	0.515217	24.4269	25.4473	25.6027	25.9924	24.6163	24.6993	25.2023	24.9766	11	11	11	70.1	144	17009.8
CG34253	CG34253	0.192063	0.289873	20.1269	18.8676	19.1506	19	19.6327	19.8465	19.7207	18.7988	2	2	2	29.5	112	12482.2
Prp8	Pre-mRNA processing factor 8	0.19175	0.691031	27.1467	28.3316	28.2434	28.5125	27.4794	27.456	27.7218	27.559	107	107	107	46.2	2396	279578
CG11857	CG11857, isoform A;CG11857, isoform B	0.189135	0.39441	19.5281	19.8836	19.1973	19.3595	20.7215	20.2034	20.4392	20.2024	3	3	3	21.7	222.5	25637.2
4E-T	CG32016, isoform H;CG32016, isoform B	0.189053	0.453875	21.4794	20.6309	20.0455	19.9033	19.8203	19.8141	19.9829	20.0459	4	4	4	6.7	994.5	112235
CG30382;Prosalpha1	Proteasome subunit alpha type;Proteasome subunit alpha type-6	0.18892	0.57427	22.8629	22.3064	22.2464	22.4126	23.0388	23.4811	23.6116	23.1473	10	10	10	34.4	244	27162.1
betaTub60D	Tubulin beta-3 chain	0.18835	0.477311	27.4837	27.521	27.4356	27.8284	27.8987	27.9344	27.7496	28.2668	22	12	12	54.2	454	50849.2
CG11107	CG11107	0.18643	0.375659	21.1916	22.1494	22.0823	21.9111	21.8088	21.959	22.1399	21.5977	5	5	5	8.4	729	82652
Tcp-1eta	LD47396p	0.184788	0.360698	23.6593	23.4517	23.3444	23.5637	24.0062	24.5236	24.8474	23.9697	20	20	20	52.9	544	59386.7
CG6843	CG6843	0.182353	0.191729	22.5156	23.5559	23.366	23.5516	23.3823	22.9171	22.4417	21.6343	10	10	10	29.8	366	43647.9
CG9213	CG9213, isoform B;CWF19-like protein 2 homolog	0.182248	0.536689	23.9732	24.4873	24.7178	24.915	23.4179	23.2806	23.2234	23.4854	21	21	21	29.7	687	78148.9
CG17454;CG17454-RA	CG17454, isoform A;CG17454, isoform B	0.18204	0.338177	21.1269	21.973	22.3843	22.2904	21.4654	22.1429	21.8775	21.5777	7	7	7	30.9	236.5	27419.6
jar	Myosin heavy chain 95F	0.180665	0.342034	22.4761	22.0603	22.2339	21.758	22.6905	22.092	22.3864	21.8599	12	12	12	12.2	1253	143299
Tcp-1zeta	GH13725p	0.179963	1.27628	24.9589	24.7752	24.743	24.4391	25.5595	25.6362	25.7845	25.4961	24	24	24	51.4	533	58246.3
Cpr64Ad	Cuticular protein 64Ad	0.179353	0.12184	28.0525	26.1409	26.1015	25.2937	26.1572	24.7631	25.4635	24.7397	11	11	11	45.7	247	24279.2
RagC-D	GH16429p	0.175555	0.492507	NaN	NaN	NaN	18.7092	18.7417	19.3284	19.3146	19.4484	1	1	1	5.7	385	43965.4
tmod	Tropomodulin, isoform D;FI20012p1;FI18705p1;Tropomodulin, isoform H;GH23271p;Tropomodulin, isoform C	0.172484	0.34429	22.7966	21.3096	21.7745	21.1923	22.004	22.4212	22.1352	21.4591	7	7	7	22.1	406	45895
rin	AT27578p	0.172326	0.204784	25.2457	24.287	23.8021	23.9289	24.7453	25.5005	24.5245	24.1112	19	19	19	31.9	690	74943.4
Ca-P60A	Calcium-transporting ATPase sarcoplasmic/endoplasmic reticulum type	0.171128	0.933433	27.4432	27.5292	27.8522	27.9275	28.8422	28.5895	28.9212	28.9251	45	45	45	44	1011	110656
CG3815	CG3815	0.17106	0.0640532	19.263	19.4748	NaN	NaN	19.447	19.5048	19.4894	18.5421	2	2	2	3.2	878	98335.9
CG3999	CG3999	0.16993	0.203015	20.7994	19.3664	19.299	18.9594	19.327	20.4946	19.3829	19.7088	4	4	4	5.4	985	109714
CG6074	CG6074	0.169566	0.0541922	NaN	NaN	NaN	NaN	18.4396	NaN	NaN	NaN	2	2	2	9	311	35052.8
CG15561	CG15561	0.169261	0.111017	NaN	NaN	NaN	18.0201	17.3311	17.1399	18.0669	17.7869	2	2	2	5.9	357	39942
Imp	IGF-II mRNA-binding protein, isoform K;IGF-II mRNA-binding protein;IGF-II mRNA-binding protein, isoform L;IGF-II mRNA-binding protein, isoform D;FI20063p1	0.167822	0.543844	23.0083	23.3867	23.1301	23.619	23.4451	23.6808	23.8526	23.4886	12	12	12	22.8	580	63425.7
Prosbeta7	Proteasome subunit beta type-4	0.16504	0.220166	21.5604	21.7467	22.0911	20.924	21.9064	21.6654	22.1813	22.4815	4	4	4	19.8	268	29985.9
Hrs	Hepatocyte growth factor-regulated tyrosine kinase substrate	0.164754	0.16299	19.4176	19.0694	19.3698	19.2195	20.1312	20.2265	20.3321	19.8074	2	2	2	6.8	703.5	78913.7
Dlic	Dynein light intermediate chain, isoform A;Dynein light intermediate chain, isoform B	0.163223	0.518044	20.719	20.3638	20.5165	20.1375	21.2132	21.2467	21.1293	20.7845	5	5	5	14	445.5	49330.6
HP1b	FI06908p	0.163149	0.119185	22.0719	22.4456	21.7542	21.6627	22.4284	21.2694	20.4772	20.9816	3	3	3	16.2	240	25974.2
Vps29	GH25884p	0.16292	0.205821	NaN	17.7577	18.113	17.1798	17.5801	18.1378	18.8485	18.4621	2	2	2	12.6	182	20473.6
ben	Bendless, isoform B;Ubiquitin-conjugating enzyme E2 N	0.160441	0.177971	20.3609	18.7209	19.447	20.0216	19.8929	20.9227	21.0776	20.2262	2	2	2	17.9	151	17235.8
CG7639	SAM50-like protein CG7639	0.159175	0.101325	16.6416	16.9243	16.434	NaN	NaN	NaN	NaN	16.3588	3	3	3	7.2	443	49058.6
ScpX	LD10783p	0.158185	0.767047	24.8541	24.4689	24.4718	24.5126	25.2522	25.3303	25.1664	24.9453	13	13	5	38.6	544	59007.5
CG10077	CG10077, isoform A;CG10077, isoform C	0.155405	0.845221	25.9112	25.4408	25.5208	25.4935	25.1454	25.1646	25.062	24.8496	33	33	30	49.4	645	69684.2
vari	Varicose, isoform C;Varicose, isoform E;FI01467p;FI17352p1	0.152333	0.386676	21.4405	21.6413	21.6877	21.0863	21.7736	22.124	21.8517	21.926	6	6	6	17.5	613	69849.6
CG17896	Probable methylmalonate-semialdehyde dehydrogenase [acylating], mitochondrial	0.15185	0.269417	24.1355	23.8712	24.0173	23.9204	24.6116	24.7914	25.4584	24.8737	17	17	17	39.1	515.5	55502.8
tsr	Cofilin/actin-depolymerizing factor homolog	0.151262	0.498715	26.1	26.1276	26.2091	26.4226	26.8522	27.1194	27.1042	27.0162	14	14	14	78.4	148	17153.5
SmG	Probable small nuclear ribonucleoprotein G	0.15081	0.2246	23.7889	24.3929	24.305	24.529	24.32	23.8516	23.5919	23.3181	4	4	4	48.7	76	8538.08
Taf5	Transcription initiation factor TFIID subunit 5	0.148702	1.19919	25.7559	26.7848	27.0268	27.0135	26.737	26.7453	26.8601	26.8175	40	40	40	54.5	704	79324.9
PDCD-5	Programmed cell death 5	0.147654	0.249376	19.9535	20.8661	20.8131	20.9314	21.0278	21.4531	21.5824	20.5497	2	2	2	17.3	133	15090.9
Prosalpha5	Proteasome subunit alpha type-5	0.144705	0.184498	19.4264	18.9249	19.4285	18.3613	20.4221	20.5017	21.2111	19.7725	3	3	3	14.8	244	26883.6
ergic53	Ergic53, isoform A	0.144022	0.314165	21.6376	20.252	20.3589	20.7049	21.68	20.8309	21.1707	20.9221	5	5	5	15.2	512	57568.3
Spt5	Transcription elongation factor SPT5	0.144001	0.506331	25.5125	26.2471	26.1785	26.3189	25.6824	25.9431	26.034	25.9852	37	37	37	41.7	1020	112889
Ilk	Integrin linked kinase, isoform A	0.143718	0.409946	19.4748	19.2601	19.4188	19.7953	19.6493	20.0947	20.1734	20.382	4	4	4	8.3	448	50742.2
Vago	Vago, isoform B	0.143583	0.281606	21.4533	20.3895	19.6329	19.405	19.842	20.3135	20.2013	20.6203	4	4	4	41.2	160	18147.6
Lcp65Ad	Cuticle protein LCP65Ad	0.143565	0.150249	30.731	30.3679	29.6455	28.7812	29.5473	28.331	28.5417	28.54	9	9	9	71.3	108	11748.1
cpa	F-actin-capping protein subunit alpha	0.141458	0.139696	18.9722	18.6524	18.1548	18.1234	20.4571	19.6228	20.2754	19.021	2	2	2	7.7	286	32759.5
Rpb4	DNA-directed RNA polymerase II 16 kDa polypeptide	0.1412	0.155328	20.2848	20.9461	21.1345	20.946	21.0271	20.9606	20.4754	19.718	5	5	5	25.9	139	16212.4
Ccp84Ae	Ccp84Ae	0.140465	0.109897	26.2158	23.6388	23.4269	22.3267	23.9521	23.5932	24.725	23.0537	13	13	13	83.7	208	21339.8
CG5854	CG5854, isoform A;CG5854, isoform B	0.14028	0.310326	21.6486	21.5813	22.1069	21.4032	22.0846	22.2337	22.1423	22.3353	6	6	6	22.6	350	39517.3
Gel	Gelsolin	0.14021	0.585345	24.0468	23.8182	23.7059	23.2904	23.985	24.3537	23.9729	23.9271	14	14	14	21.3	798	88374.5
CG13900-RA	CG13900, isoform A	0.139938	0.395802	24.5638	25.8178	25.7824	25.8435	25.0288	25.082	25.2811	24.7278	42	42	42	37.5	1227	136616
EndoGI	Endonuclease G inhibitor, isoform A	0.138063	0.177402	20.2913	20.7348	20.5471	20.2738	20.7997	21.315	21.5174	20.9961	2	2	2	10.3	359	40614.3
kra	Protein krasavietz	0.137195	0.110986	NaN	NaN	NaN	18.5204	18.9806	20.8298	20.5693	20.5943	2	2	2	5.5	422	49224.5
Rab4	Rab-protein 4, isoform A	0.13698	0.169947	18.3446	18.2698	18.5192	18.5175	18.946	20.0705	19.2925	19.0204	3	2	2	16	213	23573.6
cer	Crammer	0.136667	0.376298	22.5993	23.4519	22.8783	22.5612	23.2684	23.3485	23.5157	23.3476	8	8	8	78.5	79	9463.66
l(2)gl	Lethal (2) giant larvae, isoform G;Lethal(2) giant larvae protein;Lethal (2) giant larvae, isoform K	0.13576	0.581328	21.1744	21.583	21.3964	21.1052	21.9409	22.1313	22.0637	21.6584	9	9	9	9.6	1153	125896
rno	PHD finger protein rhinoceros	0.135445	0.439164	21.2262	22.4851	22.4161	23.0401	21.7691	21.7897	21.2768	21.3474	17	17	17	6.5	3241	347626
CG5903	CG5903	0.133535	0.193768	NaN	18.9887	19.8531	20.0455	21.6671	21.3266	21.3703	20.9544	3	3	3	20.8	226	24481.3
Eno	Enolase, isoform F;Enolase	0.132478	0.469114	28.9559	27.338	27.403	27.2007	28.093	28.5329	28.512	28.2992	25	25	25	69.3	433	46662.2
Cp1	Cathepsin L	0.132408	0.620031	25.6158	25.8085	26.0144	25.8349	26.3599	26.6387	26.5288	26.2491	15	15	15	46	356	39785.7
CG40045	CG40045, isoform D;CG40045, isoform A	0.132358	0.240209	20.8887	20.8109	20.7242	20.1456	21.3894	21.5888	22.1365	21.2958	3	3	3	13.8	167.5	19284.5
levy	Levy	0.132167	0.248483	24.6332	25.4375	24.3338	24.8371	25.2939	25.4816	25.2671	24.6335	5	5	5	34.9	109	12482.2
vnc	LD19812p	0.132078	0.168829	20.7548	20.2649	20.9886	21.5006	22.0104	22.2078	21.1942	21.1499	5	5	5	26.5	196	22324.2
CG6455	Putative mitochondrial inner membrane protein	0.129473	0.685788	23.9014	23.6569	23.3013	23.161	24.3024	24.0156	24.2502	23.9832	24	24	24	30.9	739	82014.3
Ank2	Ankyrin 2, isoform AA;Ankyrin 2, isoform U;Ankyrin 2, isoform M;Ankyrin 2, isoform G;Ankyrin 2, isoform Y;Ankyrin 2, isoform L;Ankyrin 2, isoform F;Ankyrin 2, isoform J;Ankyrin 2, isoform T;Ankyrin 2, isoform P;Ankyrin 2, isoform Z;Ankyrin 2, isoform K;Ankyrin 2, isoform S;Ankyrin 2, isoform Q;Ankyrin 2, isoform V;Ankyrin 2, isoform R;Ankyrin 2;Ankyrin 2, isoform W	0.128064	0.119325	23.3255	22.3682	22.7006	22.3455	21.0833	21.4972	21.7481	20.3037	10	10	10	6.5	4226.5	464394
Trxr-1	Thioredoxin reductase 1, mitochondrial	0.12766	0.0873521	20.2228	19.9095	20.3717	20.0931	20.3866	20.0706	21.9388	20.8191	5	5	5	15.1	499.5	54168.7
Cpr49Ag	Cuticular protein 49Ag	0.127498	0.0637535	23.0348	20.8953	19.8745	19.3287	20.8077	18.9452	21.9689	19.2991	2	2	2	21.6	134	14542.1
AGO2	Protein argonaute-2;Argonaute 2, isoform E	0.127337	0.77949	23.0621	23.5201	23.3832	23.5523	23.6418	23.7195	23.744	23.7534	20	20	20	35.3	1214	136850
CG13044	CG13044	0.126148	0.0671593	27.5779	25.5478	24.4894	23.7967	25.0305	24.8327	25.4629	23.731	2	2	2	29.7	155	15631.3
Taf6	Transcription initiation factor TFIID subunit 6;TBP-associated factor 6, isoform B	0.124842	0.3533	26.9996	28.0742	28.2521	28.2914	28.0069	28.0553	28.3965	28.1173	33	33	33	70.1	605.5	65610.7
eIF3-S8	Eukaryotic translation initiation factor 3 subunit C	0.124187	0.480819	24.6689	24.7757	24.8216	24.8378	25.6262	25.4902	25.7098	25.366	28	28	28	31.3	910	105654
Src42A	Tyrosine-protein kinase Src42A	0.12322	0.10616	19.396	18.9867	19.1469	19.5198	19.9222	20.6511	20.9032	19.6496	5	4	4	11	517	59069.4
kdn	Probable citrate synthase, mitochondrial	0.121572	0.0943792	20.0465	19.4	19.5462	19.758	19.4787	20.1608	21.5781	20.5465	5	5	5	13.1	493	54895.6
Fatp	Fatty acid (Long chain) transport protein, isoform A;Fatty acid (Long chain) transport protein, isoform D	0.120174	0.213958	NaN	20.0769	20.0032	20.1707	20.5567	21.3639	20.8996	21.2154	5	5	5	9.9	647	72641.7
Not1	Not1, isoform F;Not1, isoform D;Not1, isoform C;Not1, isoform E	0.119977	0.29578	22.9533	22.3858	22.5181	21.6414	22.7086	22.6087	23.071	22.4764	6	6	6	3.8	2497.5	280378
Eig71Ec	Ecdysone-induced gene 71Ec	0.118853	0.070409	18.5677	NaN	17.7678	17.2514	NaN	18.1038	18.3813	17.0331	1	1	1	9.2	173	20238.1
RpS27	40S ribosomal protein S27	0.118333	0.218362	25.5701	25.8956	25.8978	25.5168	26.088	25.9754	25.7525	25.3269	6	6	6	42.9	84	9364.1
XNP	Transcriptional regulator ATRX homolog	0.116165	0.332462	21.5027	22.4259	22.6249	22.8169	21.8962	22.4652	22.2542	22.4367	10	10	10	7.7	1311	148220
CG6972-RA	CG6972	0.115314	0.123855	17.9632	18.5654	18.5864	18.8572	19.0715	20.4784	19.5571	19.907	3	3	3	9.2	295	33961
Ef1alpha100E	Elongation factor 1-alpha;Elongation factor 1-alpha 2	0.113352	0.0889673	25.4884	24.8514	24.7052	25.0689	25.2311	25.6542	25.2157	24.5602	19	2	2	41.6	462	50662.5
CG2254	CG2254	0.112043	0.0246713	18.7258	19.4254	18.4529	18.0783	18.8245	18.5604	19.1501	NaN	3	3	3	12.8	320	35575.4
Spf45	FI02801p	0.111583	0.0655156	17.9635	18.4806	18.0294	19.7024	18.2116	18.2979	18.2649	NaN	2	2	1	6.9	403	44389.4
CG12480	CG12480, isoform B;CG12480, isoform A	0.109962	0.0506818	NaN	NaN	NaN	17.4345	NaN	NaN	NaN	NaN	3	3	3	16.6	594	61824.5
His2B	Histone H2B	0.10891	0.813751	30.2181	30.2845	30.6327	30.5004	30.1312	30.0706	29.9496	30.1616	13	13	13	70.7	123	13696
Vha55	Vacuolar H[+]-ATPase 55kD B subunit, isoform C;V-type proton ATPase subunit B	0.107708	0.475481	24.2845	23.7621	23.8587	24.2359	24.4672	24.7321	24.8467	24.5704	14	14	14	34.7	490	54549.4
lva	Lava lamp, isoform D;Protein lava lamp	0.105907	0.131251	21.0215	20.6011	20.6848	21.8463	20.958	20.9341	20.561	20.3244	9	9	9	3.9	2779	315900
Rm62	Rm62, isoform H;ATP-dependent RNA helicase p62	0.103038	0.334497	26.6146	25.6467	25.8428	25.4492	25.7703	25.7171	25.6816	25.4921	21	18	18	47	578	62829.2
NimC3	Nimrod C3	0.102158	0.129949	20.0588	18.8614	19.0045	18.6924	19.791	19.4743	18.8244	19.1261	2	2	2	9.4	224	25269.8
Src64B	Src oncogene at 64B, isoform G;Src oncogene at 64B, isoform K;Tyrosine-protein kinase Src64B	0.100607	0.0887894	18.6703	NaN	NaN	NaN	NaN	NaN	NaN	NaN	2	2	2	6.5	552	63002.6
CG5384	Ubiquitin carboxyl-terminal hydrolase	0.0992899	0.114621	20.8785	20.6402	19.9525	19.7354	21.17	22.1454	21.8923	20.9697	8	8	8	20.2	475	53707.3
SmD3	Small nuclear ribonucleoprotein Sm D3	0.0992656	0.146138	25.5148	26.2632	26.0782	26.8999	25.6422	26.284	25.1359	25.4946	6	6	6	45.7	151	15581.9
Sucb	LD44970p	0.0988574	0.345447	23.7551	23.6349	23.6684	23.7588	24.57	24.9096	24.6891	24.492	13	13	13	40.4	416	45038
wdb	BcDNA.LD34343	0.0974994	0.142067	20.6266	20.6395	20.5615	20.6079	20.7587	21.4347	21.793	21.19	3	3	3	6.9	524	59726.4
alph	Alphabet, isoform A;Alphabet, isoform B;Alphabet, isoform E	0.0970654	0.0493266	NaN	17.9528	18.7389	18.3644	18.7415	21.0013	18.9006	18.6937	2	2	2	5.2	371	41386.8
CG12384	CG12384	0.0966949	0.143907	20.212	19.9073	20.5905	20.5254	21.0907	21.8829	21.2982	20.9673	1	1	1	16.7	96	9943.27
CG12262	Probable medium-chain specific acyl-CoA dehydrogenase, mitochondrial	0.0957975	0.412084	24.7253	24.3454	24.6971	24.5833	25.0821	25.2367	25.5713	25.2758	18	18	18	40.1	419	45871.5
Tm1	Tropomyosin-1, isoforms 9A/A/B	0.0953431	0.0841745	20.7875	22.1279	22.2168	21.7685	23.2441	21.5114	22.0961	21.6203	28	3	0	84.9	284	32499.4
GC1	CG18347	0.0953393	0.208551	20.8868	21.3328	20.5411	21.1771	21.902	22.0075	21.6388	22.4689	6	6	6	23.7	321	34556.5
MED4	Mediator of RNA polymerase II transcription subunit 4	0.093677	0.119493	18.856	18.9485	18.95	19.2388	19.2068	19.7098	19.4267	18.4294	3	3	3	15.5	258	28312.7
CG8064	CG8064	0.0934119	0.0375802	NaN	18.7294	NaN	NaN	NaN	NaN	NaN	16.9188	2	2	2	2.7	922	103151
CG9281	CG9281, isoform B	0.0920982	0.104396	21.9892	21.6715	21.434	21.5339	21.6377	22.7311	22.2843	21.6685	8	8	8	13.9	611	69502.1
Galphai	G protein alpha i subunit	0.0919995	0.135937	19.8855	19.6941	19.4626	19.8412	20.0376	20.1922	20.7146	20.7255	4	3	3	16.3	355	40595.6
Nlp	Nucleoplasmin-like protein	0.091908	0.163417	20.6967	19.8927	19.5242	19.5672	20.1631	20.4244	19.8745	19.7039	2	2	2	19	136.5	15263.4
Nnp-1	Ribosomal RNA processing protein 1 homolog	0.0917125	0.0834448	19.8944	20.9375	20.0477	19.9402	19.0988	19.9773	20.3409	20.339	6	6	6	12.1	687	78996.3
CG3542	CG3542	0.0904584	0.466948	28.7983	29.6586	29.6106	29.9345	29.2774	29.3767	29.2994	29.2257	54	54	54	58.6	806	91327.6
Mhc	Myosin heavy chain, muscle;Myosin heavy chain, isoform T;Myosin heavy chain, isoform U	0.0891423	0.0899632	30.8388	28.7012	28.9574	28.1582	29.6219	29.4859	30.256	29.2347	173	173	0	65.9	1962	224385
Cand1	Cullin-associated and neddylation-dissociated 1, isoform B;Cullin-associated NEDD8-dissociated protein 1	0.0814419	0.0943119	23.1602	23.2304	22.5595	21.9923	23.4858	23.6984	23.749	22.4119	13	13	13	11.4	1248	139355
BcDNA.LD23634	BcDNA.LD23634	0.0799103	0.294209	29.1466	30.3812	30.4921	30.6857	29.9688	30.0449	29.7624	29.8275	82	82	82	71	998	112698
Mtpalpha	Mitochondrial trifunctional protein alpha subunit, isoform B;BcDNA.GH12558	0.0786324	0.14649	25.4962	25.3638	25.4085	25.3966	25.4887	26.0206	26.2301	25.6431	31	31	31	44.4	763.5	81856.3
lic	Licorne	0.0778995	0.0962177	20.7859	21.3794	20.4189	21.3534	20.5049	21.6042	21.7824	21.5914	6	6	6	22.2	334	38194.9
CG13053	CG13053, isoform A	0.0757213	0.0363963	NaN	21.7213	NaN	NaN	NaN	NaN	NaN	NaN	1	1	1	19.8	91	10132.5
CG3680;CG3680-RA	CG3680, isoform D;CG3680, isoform B;CG3680, isoform C;CG3680, isoform A	0.0748672	0.230305	18.6656	18.0496	17.9257	18.5136	18.4919	18.502	18.0744	18.0236	2	2	2	4.3	924.5	99823.8
shot	Short stop, isoform H	0.0740647	0.101719	24.8766	25.3487	24.7707	24.9568	25.3264	25.1031	25.2971	24.5407	5	5	1	0.9	8805	989549
DIP2	DISCO interacting protein 2, isoform E;DISCO interacting protein 2, isoform D;Disco-interacting protein 2;DISCO interacting protein 2, isoform B;DISCO interacting protein 2, isoform C	0.0728574	0.0794861	17.8576	17.216	18.3801	18.2375	17.8064	18.8036	19.1959	18.3143	3	3	3	1.9	1767	193515
CaBP1	Calcium-binding protein 1, isoform A	0.0727172	0.159802	23.2994	22.5441	22.4585	22.2124	22.9931	23.3177	22.8122	23.2026	10	10	10	22.2	433	46752
Rpn5	GH11341p	0.0723	0.143086	21.2118	21.2556	21.3508	21.2137	22.6061	22.364	22.2406	22.1703	6	6	6	15.7	502	57747.7
CG4668;CG42389-RF;CG13260	CG42389, isoform G;CG42389, isoform F;CG42389, isoform H;CG42389, isoform E	0.0708079	0.104972	20.3507	20.9502	20.8394	21.1626	21.3685	22.2949	22.1351	22.0823	11	11	11	13.7	1770.5	190886
eIF2B-delta	eIF2B-delta, isoform B;LD05345p	0.0698128	0.0999611	21.5146	21.619	21.4337	21.3996	22.1238	22.0865	21.2274	21.5306	5	5	5	12.8	601	64725.9
CG2246;CG2246-RB;CG2246-RA	CG2246, isoform D;CG2246, isoform C;CG2246, isoform B;CG2246, isoform A	0.0695372	0.0494006	20.6245	20.1452	19.971	20.1626	20.3079	21.0159	21.9255	19.8249	3	3	3	11.2	386.5	42677.7
Gp150	Gp150 protein;Gp150, isoform D	0.0687561	0.0400629	19.9042	17.3323	17.7108	NaN	18.3211	19.1932	NaN	17.1472	2	2	2	2	1063.5	119556
Unc-89	Unc-89, isoform B;Unc-89, isoform C	0.068572	0.269717	22.4345	21.1921	20.7383	20.6621	22.1236	22.2283	22.316	21.9419	12	12	12	4.4	4188	472362
dod	Putative peptidyl-prolyl cis-trans isomerase dodo	0.0681319	0.145505	23.8451	23.6885	24.3856	24.4463	23.6025	24.2871	24.1465	23.8087	9	9	9	73.5	166	18376.5
CG13046-RB	CG13046	0.0677223	0.0340388	23.8415	21.4634	21.5636	20.3526	21.71	19.3872	19.359	19.3984	3	3	3	23.8	181	19313.8
RpS14b;RpS14a	Ribosomal protein S14b, isoform B;40S ribosomal protein S14	0.0669875	0.149654	27.2476	27.3714	27.3285	27.2966	27.8972	27.4491	27.3307	27.1315	13	13	13	70.2	151	16264.7
Vha68-2	MIP16230p;V-type proton ATPase catalytic subunit A isoform 2	0.0650244	0.165038	23.5649	23.843	23.6513	23.5725	24.1445	24.4713	24.6164	24.515	14	14	10	30.1	614	68301.8
CG9953	CG9953	0.0644355	0.0472664	NaN	NaN	NaN	18.5507	19.0704	19.1775	20.8899	19.3433	3	3	3	6.9	508	56861.9
RpII33	GH07456p	0.0643048	0.0628907	22.8431	24.1096	23.8457	23.7779	22.0509	22.2929	22.7561	23.0859	5	5	5	27.6	275	31243
RnpS1	LD23870p	0.0634828	0.148203	26.6291	27.2649	27.1597	27.469	26.1439	26.1153	25.752	26.1197	10	10	10	25.9	374	41848.9
Lsd-1	Lipid storage droplets surface-binding protein 1	0.0570803	0.0392681	NaN	NaN	NaN	NaN	NaN	NaN	NaN	NaN	25	1	1	61.7	431	48832.6
eIF-3p66	Eukaryotic translation initiation factor 3 subunit D-1	0.0563202	0.0982585	24.2814	24.4198	24.5097	24.3353	24.2628	24.8205	24.5376	25.1091	15	15	15	38.6	560	63797.6
Cbp20	Nuclear cap-binding protein subunit 2	0.0562325	0.0787468	20.306	20.2723	20.5226	20.653	20.1042	19.9959	20.1909	20.4104	2	2	2	13.6	154	17718.8
CG7860	CG7860, isoform B;Probable isoaspartyl peptidase/L-asparaginase CG7860	0.050446	0.0136448	18.4958	18.4237	17.9396	18.3438	19.6588	18.4396	17.7021	NaN	1	1	1	3.3	332	34861.3
deltaCOP	Coat protein (Coatomer) delta, isoform B;Coat protein (Coatomer) delta, isoform A	0.0488353	0.0680271	22.804	21.469	21.4894	21.3872	22.9424	22.1034	22.1153	21.9834	6	6	6	17.7	531.5	57861.2
Prosbeta5	Proteasome subunit beta type	0.0486727	0.0585025	19.0031	19.2251	18.9429	19.4435	19.3774	19.7047	20.2522	19.7935	3	3	3	9.6	282	31161.4
CG1677-RA	CG1677, isoform A	0.0486002	0.217169	28.1811	29.3542	29.6916	30.0178	28.4246	28.4845	28.2964	28.1914	44	44	2	46.2	1000	109053
Su(var)205	Heterochromatin protein 1	0.0484276	0.0749686	23.775	23.2463	23.4063	23.5779	23.4317	23.7194	23.8022	23.0058	9	9	9	42.2	206	23185.4
bl	Bancal, isoform A;Bancal, isoform C;Bancal, isoform E;Bancal, isoform B	0.0454006	0.186432	23.767	23.4881	23.3627	23.2369	23.9637	23.741	23.6416	23.9628	11	11	11	35.1	494.5	50054.3
lig	Lingerer, isoform E;Protein lingerer	0.0414529	0.0644003	24.8391	24.413	24.6626	24.5035	24.6395	24.8676	24.4065	24.4148	19	19	19	23.6	1337.5	135203
EG:34F3.5	CG13360	0.0406599	0.0240634	16.8894	NaN	NaN	NaN	16.6254	16.3823	16.814	NaN	1	1	1	2.4	421	48676.6
Syx13	LD27581p	0.0402641	0.0343079	NaN	NaN	NaN	15.819	NaN	NaN	NaN	16.2229	1	1	1	3.5	284	31528.5
CG9547	CG9547	0.040215	0.122119	21.3566	21.4263	21.2763	20.9768	21.7057	22.1536	21.7821	21.7952	3	3	3	14.8	419	45756.6
CG9987	tRNA-splicing ligase RtcB homolog	0.0401101	0.0938025	NaN	20.0015	19.8133	19.4906	19.9209	20.0575	19.7823	20.0483	3	3	3	7.9	506	55916.3
MED27	Mediator of RNA polymerase II transcription subunit 27	0.0393572	0.00949966	18.7286	20.506	19.7454	NaN	20.3577	20.5392	21.0311	NaN	2	2	2	6.8	293	33868.3
qkr58E-1	GH05812p	0.0384684	0.0538389	23.057	22.7321	22.94	22.85	22.9165	22.5224	22.5892	21.8709	12	12	12	28.3	396	45384.5
Taf7	TBP-associated factor 7, isoform B;Transcription initiation factor TFIID subunit 7	0.0382991	0.100053	24.5213	25.6787	25.6972	26.0174	25.4473	25.4974	25.585	25.3039	20	20	20	53.2	463	53220.4
Rpt5	26S proteasome regulatory complex subunit p50	0.0379601	0.100737	24.2592	24.1116	24.0636	24.2935	25.0497	25.0601	25.2276	24.7853	21	21	20	47.4	428	47806.7
CG5033	Ribosome biogenesis protein BOP1 homolog	0.0377307	0.0420992	NaN	19.1611	18.947	18.6802	18.6411	19.8208	18.8687	19.1382	4	4	4	8.1	700.5	81199.5
CG14995;CG14995-RC	CG14995, isoform D;CG14995, isoform G;CG14995, isoform C;CG14995, isoform I;CG14995, isoform A;CG14995, isoform F;CG14995, isoform H	0.0375295	0.0298829	19.2495	20.5402	20.2316	20.3251	19.8029	20.2983	21.5668	21.2189	3	3	3	10.5	389	44356.2
Chc	Clathrin heavy chain, isoform G;Clathrin heavy chain	0.0359373	0.123521	26.7187	26.824	26.7944	26.8491	27.4072	27.5212	27.7181	27.8632	54	54	54	39.2	1678	191177
Pabp2	Pabp2, isoform B;Polyadenylate-binding protein 2	0.0357127	0.0448627	21.1697	22.2302	22.1644	22.3649	20.9287	21.8674	21.2463	21.1444	3	3	3	25	224	24977.9
Edg78E	Ecdysone-dependent gene 78E, isoform B;Pupal cuticle protein Edg-78E	0.0356078	0.0264605	29.0831	27.6726	27.067	26.2169	26.6613	25.3984	26.0528	25.7995	3	3	3	38.5	122	13346.7
CG3225	CG3225	0.0352225	0.0423355	20.259	21.9254	21.7012	22.654	20.3229	20.8532	21.2242	20.9698	8	8	8	12.7	678	76115
CG12493	CG12493, isoform B;AT07585p	0.0350623	0.0872574	NaN	18.8363	19.209	18.9879	19.6127	19.1438	19.5441	19.4482	3	3	3	13.7	294.5	32398.7
Rpn9	26S proteasome regulatory complex subunit p39A	0.0321999	0.0296729	20.5516	19.6232	19.988	19.2943	20.3396	21.93	21.3958	20.6493	5	5	5	13.1	382	43766.7
Nsf2	Vesicle-fusing ATPase 2	0.0311604	0.0878193	21.5885	22.0384	21.5004	21.7786	22.0104	22.4046	22.3236	22.2507	8	8	4	12.6	752	83434.4
zormin	Zormin, isoform F;Zormin, isoform K;Zormin, isoform G;Zormin, isoform E;Zormin, isoform I;Zormin, isoform J	0.0299702	0.0727717	19.0835	17.0593	17.2796	17.4696	17.9864	17.7466	17.8562	17.622	4	1	1	1.7	3307.5	373405
CG11570	CG11570, isoform A	0.0294847	0.00241746	28.6603	29.2477	26.8542	28.2566	NaN	NaN	28.2332	27.8313	7	7	7	48.1	214	23942.2
CG8003	CG8003, isoform A	0.0286822	0.0554607	18.7664	18.5174	NaN	17.842	19.0689	18.6259	18.667	18.5425	3	3	3	9.1	407	45768.3
Nup154	Nucleoporin 154kD, isoform A	0.0275197	0.0369335	20.0137	20.5322	20.7012	19.881	19.6115	20.0686	19.8929	19.9572	4	4	4	3.4	1365	153895
CG3436	CG3436, isoform A	0.0267701	0.0531721	25.4589	26.6027	26.603	26.8742	25.9438	25.873	25.7581	25.665	26	26	26	64	347	38859.6
nyo	CG1499, isoform C	0.0255575	0.0180047	25.1991	23.7879	22.806	22.3222	22.2239	22.0467	22.479	21.7597	8	8	5	10.3	805	87813.2
CG12547	CG12547	0.0250001	0.100812	19.25	19.0057	18.3849	18.3896	18.7843	18.766	18.8529	18.8755	2	2	2	4.5	717	79780.5
Aats-glupro	Bifunctional glutamate/proline--tRNA ligase	0.0249252	0.0761664	23.3165	23.5352	23.3367	23.0601	24.2723	24.4949	24.4234	23.9723	26	26	26	19.8	1355	148624
Caf1	Probable histone-binding protein Caf1;Chromatin assembly factor 1 subunit, isoform B	0.0230727	0.0247109	23.2015	24.2321	24.4107	24.4849	23.1168	23.8827	23.5534	23.4459	12	12	12	32.8	429.5	48599.2
l(3)72Ab	Putative U5 small nuclear ribonucleoprotein 200 kDa helicase	0.0229845	0.0882023	27.9759	28.8792	29.0065	29.2046	28.1532	28.1766	28.1992	28.3154	101	101	101	49.9	2142	244510
ND42	NADH:ubiquinone reductase 42kD subunit, isoform B;NADH dehydrogenase [ubiquinone] 1 alpha subcomplex subunit 10, mitochondrial	0.0219321	0.0618739	23.5289	23.3559	22.988	22.9804	23.9233	24.2179	24.4461	24.4032	9	9	9	22.4	407	46897.6
Cyp1	Peptidyl-prolyl cis-trans isomerase	0.0200028	0.0268055	25.0816	24.7201	24.2043	23.765	24.5479	24.9437	25.1677	24.6248	11	11	10	52.9	227	24666.2
Act5C	Actin 5C, isoform E;Actin-5C	0.0188646	0.0436814	27.9605	27.1558	27.2329	27.0872	27.8789	27.7191	27.8447	27.854	27	6	0	66	376	41821.8
msn	Misshapen, isoform A;Misshapen, isoform F;Misshapen, isoform B;Misshapen, isoform H;Misshapen, isoform G;LD34191p	0.0187821	0.0519281	23.3547	22.9092	22.8232	22.2501	23.0404	22.8465	23.1062	23.0019	17	17	17	14	1206.5	130994
CG6066	UPF0396 protein CG6066	0.0187726	0.0422149	25.4039	26.2125	26.4323	26.6655	25.6907	25.495	25.1299	25.2621	12	12	12	26.3	463	52947.8
RpII140	DNA-directed RNA polymerase II subunit RPB2	0.0179796	0.0490303	24.7713	25.0439	24.7909	24.8419	24.0903	24.5199	24.2421	24.0089	34	34	34	32.1	1176	134043
mt:CoII	Cytochrome c oxidase subunit 2	0.0146704	0.0207149	22.0615	22.3431	22.1008	22.1096	23.5008	24.0781	23.8996	24.2443	3	3	3	16.2	228	26190.5
rump	FI21236p1	0.0146699	0.0212928	25.8799	25.689	25.4891	25.7805	25.9749	25.3374	25.5315	25.2653	18	18	18	31.8	632	66731.2
Arp2	Actin-related protein 2	0.0139046	0.0132674	19.8742	19.8856	20.2055	19.8392	20.8053	21.2782	21.0637	19.7269	4	4	4	13.2	396.5	44992.6
ssx	LD21345p;EG:132E8.1 protein	0.00920391	0.00325553	NaN	18.934	18.5141	18.6439	18.2596	NaN	NaN	NaN	2	2	2	4.5	464	51159.8
Uba1	GH24511p	0.0085206	0.015149	25.3513	24.8972	24.8641	24.831	25.1983	25.7867	25.7991	25.1249	23	23	23	23.3	1191	130758
nop5	CG10206-PA	0.00798512	0.0280338	24.4559	24.4987	24.607	24.7406	24.2464	24.6898	24.5	24.4256	15	15	15	33.5	511	57171
CG2025	CG2025	0.0076952	0.00792668	20.2488	21.5713	21.4869	21.2752	20.8199	22.0031	21.6833	21.892	9	9	9	10.2	1147	132763
CG6084	CG6084, isoform A;CG6084, isoform D;AT18092p;CG6084, isoform C	0.00712919	0.0176959	24.3356	23.7903	23.6343	23.273	24.2955	24.4395	24.1178	23.809	17	17	17	58.2	333	38016.3
beta-Spec	Beta spectrin, isoform B;Spectrin beta chain;Beta spectrin, isoform C	0.00693512	0.0221163	26.0397	25.8096	25.7507	25.4812	26.0212	25.981	25.6727	25.7757	54	54	54	29	2291	265739
ALiX	ALG-2 interacting protein X	0.00514507	0.0119858	20.9975	20.2971	21.3197	20.9962	21.6832	21.8939	22.0759	21.5368	7	7	7	9.8	836	92538.9
CG32564	CG32564	0.00502777	0.00186364	NaN	NaN	NaN	NaN	NaN	NaN	NaN	17.9153	2	2	2	9.8	409	39766.6
CG10960	CG10960, isoform A;CG10960, isoform B	0.00364733	0.0027751	18.3409	18.0958	18.0863	17.3967	18.5192	18.1072	19.4179	NaN	2	2	2	5.7	505	54868.6
Ip259	GM13959p	0.00235987	0.00269328	19.4099	19.6986	19.3316	19.5233	19.4102	18.6679	19.5823	18.5879	2	2	2	6.9	259	30029.5
CG9123-RA	CG9123	0.00187778	0.000743913	21.4767	22.0883	21.6039	22.0233	21.6534	19.8198	17.8772	21.1032	9	3	3	23.3	434	48732.2
cyp33	Peptidyl-prolyl cis-trans isomerase E	0.00185251	0.00419907	24.9764	26.555	26.4284	26.7432	25.361	25.5735	25.2903	25.5834	15	15	15	68.7	300	33276.3
CG6454	CG6454, isoform D;CG6454, isoform C	-0.000335693	8.91087e-05	NaN	20.9127	NaN	NaN	20.1044	19.737	NaN	19.5112	2	2	2	3.8	1348	147589
RpL23	60S ribosomal protein L23	-0.000400543	0.00123974	26.4127	26.7893	26.9745	27.1432	27.1465	27.2759	26.9315	26.9893	12	12	12	77.1	140	14936.5
sgg	Shaggy, isoform R;Shaggy, isoform M;Shaggy, isoform P;Shaggy, isoform Q;Shaggy, isoform C;Shaggy, isoform J;Protein kinase shaggy;Shaggy, isoform K;MIP03616p	-0.00106764	0.00167957	21.961	20.9197	21.3958	20.924	21.9013	21.9837	22.3797	22.2921	6	6	6	14.7	575	58771.7
CG3164	CG3164, isoform B;CG3164, isoform A	-0.00155067	0.00240448	24.4682	23.9085	24.1178	23.8491	24.6202	24.6271	23.9208	24.6229	15	15	15	23.8	698.5	78291.8
Actn	Alpha actinin, isoform D;Alpha actinin, isoform G;Alpha-actinin, sarcomeric;Alpha actinin, isoform F	-0.00193262	0.00222543	24.4667	23.1173	23.1169	22.9113	24.1637	23.6127	24.453	23.5077	16	16	16	20	896	103888
Cpr	Cytochrome P450 reductase, isoform B;NADPH--cytochrome P450 reductase	-0.00259686	0.00313204	20.125	19.6488	19.4181	18.8273	20.1661	20.4632	20.9486	20.0259	4	4	4	9.1	679	76346.8
RpS24	40S ribosomal protein S24	-0.00356054	0.00582072	26.6075	27.1648	27.4281	27.4588	27.6757	27.0858	27.2438	26.7992	9	9	9	43.5	131	15047.7
Rfabg	Retinoid-and fatty acid-binding glycoprotein, isoform B;Apolipophorins	-0.00452518	0.00922286	29.1488	28.1528	28.0698	27.3899	28.1525	28.4151	28.7557	28.3066	136	136	136	45.9	3351	372677
Prx5	LD45324p	-0.00571012	0.00998319	22.0446	22.1504	22.7254	22.8092	23.3042	23.2668	22.7243	23.2087	7	7	7	36.8	190	19896
l(1)G0320	LD26546p	-0.00769758	0.00498571	20.2545	22.1846	21.7493	21.761	23.0604	22.1674	22.5731	23.5009	4	4	4	16.9	302	33030.3
Bub3	Bub3	-0.0104303	0.0147728	19.2512	19.6638	19.6151	19.3389	19.9293	19.4045	20.0184	19.2852	3	3	3	13.5	326	37415.4
Pu	GTP cyclohydrolase 1	-0.0107307	0.0179404	19.2195	18.9296	19.1831	19.2602	20.1442	20.1813	19.9873	19.3733	4	4	4	14.5	308	33876.6
CG4968	Ubiquitin thioesterase otubain-like	-0.0108299	0.0268309	20.1392	22.574	21.8857	22.3887	22.631	22.6025	22.7098	22.3824	2	2	2	13.4	262	30372
Hsp83	Heat shock protein 83, isoform B;Heat shock protein 83	-0.0118804	0.0431718	27.8844	27.4401	27.199	27.0095	27.7096	28.1107	27.9663	27.7974	38	38	36	49.7	717	81865.4
gish	Gilgamesh, isoform A;Gilgamesh, isoform C;Gilgamesh, isoform E;Gilgamesh, isoform B;Gilgamesh, isoform I;Gilgamesh, isoform G;AT18609p	-0.0132751	0.0337649	18.2721	NaN	18.7314	NaN	18.2227	18.3945	18.6089	18.7765	4	4	4	13	463	52125.3
Hsc70-3-RA;Hsc70-3	Heat shock 70-kDa protein cognate 3, isoform E;Heat shock 70 kDa protein cognate 3	-0.0139179	0.0403402	28.5968	28.193	28.403	28.2071	28.3456	28.6443	28.359	28.0802	42	37	37	63.9	656	72260.9
Atpalpha	Sodium/potassium-transporting ATPase subunit alpha;Na pump alpha subunit, isoform I	-0.0141172	0.046381	25.0116	25.0982	25.1884	25.1188	25.7432	25.9751	26.1947	25.8171	35	35	35	40.4	1002	111249
CtBP	C-terminal binding protein, isoform B;C-terminal-binding protein	-0.0160675	0.0808443	24.3852	24.2106	24.0649	24.0021	23.646	23.7677	23.7348	23.6922	15	15	15	40.2	386	42251.8
pix	Pixie, isoform A	-0.0170803	0.0149784	NaN	20.0527	19.4692	19.2752	20.1661	21.5502	20.9398	19.9948	4	4	4	7	611	69298.4
CG1907	CG1907	-0.0190845	0.0718014	23.5462	23.18	23.5408	23.2001	24.0432	24.3481	24.2217	24.3666	11	11	11	32.2	317	34619.3
CG8778	CG8778	-0.0213175	0.0256517	20.8832	20.7661	20.8835	20.9495	21.6905	22.1087	22.2497	21.3041	4	4	4	16.7	299	31909.1
CG10924	CG10924, isoform A;CG10924, isoform B	-0.0229149	0.0208655	22.6105	22.0598	21.836	21.718	21.8625	23.2517	22.9076	22.0529	7	7	7	15.4	600.5	66451.4
RpS16	40S ribosomal protein S16	-0.023397	0.0306216	26.7064	27.1043	27.1199	26.6823	26.8038	27.2515	27.1872	26.8514	15	15	15	68.2	148	16774.7
CG15080	CG15080	-0.0266824	0.0177659	23.2056	20.8193	18.6082	22.4126	19.9107	18.0332	18.2001	19.0531	5	5	5	4.5	1541	170668
CG33521	CG33521, isoform G;CG33521, isoform C;CG33521, isoform A	-0.0273123	0.0307294	20.2134	19.1527	19.4386	20.1164	19.4964	19.9854	19.8306	20.3023	2	2	2	4.8	649	74788.6
CG8320-RA	CG8320	-0.027427	0.0158826	17.1301	16.8529	17.1897	17.4197	18.1031	17.8575	NaN	18.1158	1	1	1	6.9	174	19563.9
proPo-A3	Phenoloxidase subunit A3	-0.027895	0.0643455	24.4367	23.2352	23.3335	22.4529	23.6812	24.0161	24.2823	23.8681	11	11	11	17.4	684	79284.7
sta	Stubarista, isoform F;40S ribosomal protein SA	-0.0283723	0.0554802	26.1445	25.8164	25.8312	25.6511	26.2587	26.5106	26.3712	26.7358	13	13	13	58.1	270	30228.2
Chd1	Chromodomain-helicase-DNA-binding protein 1, isoform C;Chromodomain-helicase-DNA-binding protein 1, isoform B;Chromodomain-helicase-DNA-binding protein 1	-0.0284977	0.0386789	22.6725	23.9345	23.7599	23.9587	22.8622	22.9009	22.8331	23.2784	15	15	15	9.9	1883	211828
Opa1	GH13793p;Optic atrophy 1-like, isoform A	-0.0285926	0.0818546	20.2246	20.3731	20.8223	20.6525	21.5953	21.7998	21.2256	21.6119	7	7	7	8.8	952.5	109499
fax	Failed axon connections, isoform C;Failed axon connections;Failed axon connections, isoform E;Failed axon connections, isoform F;Failed axon connections, isoform D;Failed axon connections, isoform B	-0.0294924	0.0384556	23.1893	23.6984	23.6461	23.8326	25.0935	24.2956	24.8672	24.0737	9	9	9	31.1	280.5	32328.3
nxf2	Nuclear RNA export factor 2, isoform C;Nuclear RNA export factor 2	-0.0308464	0.00641052	NaN	19.6456	19.7346	20.1046	NaN	NaN	NaN	20.1525	2	2	2	3.4	833	95644.4
v(2)k05816	GH22259p;V(2)k05816, isoform B	-0.0325575	0.073384	19.5875	18.9978	19.2516	19.7283	19.6527	19.6178	19.9406	20.2629	9	4	4	4.6	2409.5	265921
CG3940	CG3940	-0.0328336	0.017262	16.2696	NaN	15.7093	NaN	NaN	NaN	NaN	NaN	1	1	1	3.6	304	33921.4
Karybeta3	FI07923p	-0.0331497	0.0388365	24.7451	23.0005	22.9447	22.9476	23.3774	23.6149	23.6705	23.3037	7	7	7	9.2	1105	123561
Inx3	Innexin inx3	-0.0354371	0.0686286	19.7451	18.6888	18.498	NaN	18.8459	18.9389	19.0091	18.4421	2	2	2	8.1	395	45356.9
Thiolase	GH13256p	-0.0354772	0.178228	26.4389	25.963	26.1593	26.003	26.2649	26.5089	26.5958	26.4713	15	15	15	40.7	469	50641.3
MBD-R2	MBD-R2, isoform A;MBD-R2, isoform B	-0.0355082	0.0435807	20.2441	20.3666	20.0429	21.0379	20.481	19.9801	19.9476	19.6951	5	5	5	6.3	1125	125001
puf	Ubiquitin carboxyl-terminal hydrolase	-0.0366249	0.0376652	17.381	18.1536	17.5607	18.3825	17.6163	17.2834	18.314	17.2396	2	2	2	1.1	3703	416811
ERp60	Protein disulfide-isomerase	-0.0371485	0.132507	26.5793	26.172	25.9425	25.7064	26.3095	26.7121	26.6847	26.5447	21	21	21	41.3	489	55370.7
Piezo	Piezo, isoform I;Piezo, isoform H;Piezo, isoform J;Piezo, isoform G;Piezo, isoform E;Piezo, isoform M;Piezo, isoform L;Piezo, isoform K;Piezo, isoform F	-0.0377872	0.0170115	16.1717	17.2819	16.5299	16.7828	16.5597	17.2756	17.3928	NaN	13	13	13	6.7	2571	291613
Cpr76Bc	Cuticular protein 76Bc, isoform C	-0.0402575	0.0187399	24.1274	22.3567	21.7692	24.1784	23.8258	20.4916	21.6835	21.8845	13	13	13	30.4	424	48108
CG5525	T-complex protein 1 subunit delta	-0.040627	0.0939867	24.7129	25.0171	24.6913	24.667	25.7514	25.7591	25.6805	25.4518	11	10	10	27	533	57116.1
CG17266	Peptidyl-prolyl cis-trans isomerase	-0.0420561	0.118	20.7999	22.8137	23.1888	23.278	22.5254	22.5157	22.3505	22.4297	6	6	6	41	183	20182
Gdi	GDP dissociation inhibitor, isoform A	-0.0430274	0.0235344	20.8925	20.4944	20.3208	19.5387	20.676	21.9415	22.6477	20.3784	5	5	5	13.1	443	49903
RpS3	40S ribosomal protein S3	-0.0434093	0.220694	27.4324	27.8143	27.7896	27.9444	27.9378	27.9785	28.0374	27.827	33	33	33	88.2	246	27471.1
lilli	Lilliputian, isoform H;AF4/FMR2 family member 4	-0.0434856	0.14921	22.6176	23.6319	23.925	23.987	23.3423	22.9169	23.1311	22.9535	17	17	17	15.7	1614	173034
su(s);su(s)-RA	Suppressor of sable, isoform B;FI21160p1;Protein suppressor of sable	-0.0440247	0.0291534	NaN	NaN	18.2299	NaN	NaN	NaN	NaN	NaN	1	1	1	1.4	1325	143840
BcDNA.GH10614	BcDNA.GH10614	-0.0446901	0.0623852	22.1364	21.5227	21.8676	21.0679	21.6914	22.0582	21.9259	21.8555	5	5	5	15.8	316	36312.5
RpL17	Ribosomal protein L17, isoform E;60S ribosomal protein L17	-0.0454593	0.0555775	26.1923	26.4282	26.566	26.447	26.695	26.6056	26.9291	26.1426	11	11	11	46.8	186	21593
CG8939	CG8939	-0.0461926	0.0571391	21.2286	20.5104	19.9969	19.4977	20.1497	19.4222	18.8482	19.3999	4	4	4	6.2	817	93347.1
CG9667	CG9667	-0.0474496	0.114319	24.7213	26.0338	26.0569	26.3914	24.6757	25.2821	25.0262	24.9846	16	16	16	62.9	272	31352.3
Rcd1	Reduction in Cnn dots 1, isoform C;LD05087p;LD22513p	-0.0497746	0.0483529	19.6753	19.4403	19.7655	19.6002	19.3065	19.1629	20.5408	18.974	3	3	3	6	1001	108056
EF2	Elongation factor 2;Elongation factor 2, isoform C	-0.0498614	0.117577	28.8585	28.4615	28.6046	28.49	28.7447	29.0638	29.0836	28.7369	43	43	43	62.6	844	94458.9
CG6340	CG6340, isoform B;CG6340, isoform F;CG6340, isoform A	-0.0504394	0.0661574	18.7476	19.1992	19.3901	19.1951	19.4167	18.7321	18.9116	18.655	2	2	2	5.1	179	20201.4
Vps4	BcDNA.GH02678	-0.0508924	0.0543665	19.4236	19.1246	19.0716	19.4394	19.0659	19.6721	19.7263	19.9701	3	3	3	6.6	442	49595.7
sle	Protein slender lobes	-0.0509973	0.08156	23.242	21.9863	22.1613	21.8703	21.9379	21.5271	21.7775	20.9441	11	11	6	11.6	1425	159227
TfIIS	RNA polymerase II elongation factor, isoform B;Transcription elongation factor S-II	-0.0513401	0.163415	19.042	18.4997	19.0111	19.0394	19.0272	18.8026	19.1726	19.0571	3	3	3	15	313	34300.1
Drp1	Dynamin related protein 1, isoform A	-0.0544553	0.0661994	20.9683	21.3101	21.0505	21.3893	22.0593	22.5102	22.4004	21.3382	7	7	7	11.3	735	82566.4
Akap200	A kinase anchor protein 200, isoform D;A kinase anchor protein 200, isoform A	-0.0551305	0.129774	23.1139	22.9967	22.9054	22.8821	23.6855	23.7646	23.2871	23.7587	16	16	7	24	795	83581.4
Acn	Acinus, isoform A	-0.0564003	0.181245	26.4136	27.6084	27.5333	27.8903	26.6712	26.7547	26.5501	26.4293	27	27	27	37.3	739	83719.6
Rpn6	26S proteasome non-ATPase regulatory subunit 11	-0.0577779	0.159632	23.934	23.7261	23.6947	23.4325	24.442	24.5388	24.6646	24.2311	18	18	18	44.1	430.5	48320.1
TFAM	LD40493p;Mitochondrial transcription factor A, isoform B	-0.0582385	0.0513839	NaN	NaN	16.9226	16.6453	NaN	NaN	NaN	NaN	1	1	1	3.5	270.5	31481.2
RpS2	Ribosomal protein S2, isoform B;40S ribosomal protein S2	-0.0585098	0.160752	26.9767	27.6834	27.5614	27.5213	27.2234	27.6313	27.6611	27.5493	17	17	17	67.4	267	28899.6
dikar	Dikar, isoform C;Dikar, isoform D;Dikar, isoform F;Dikar, isoform B	-0.0585728	0.0913331	22.0766	16.3342	NaN	NaN	16.8143	16.7454	16.9382	NaN	2	2	2	1.1	3151	346109
clu	Protein clueless	-0.0588222	0.0871191	20.1939	19.697	19.7608	19.64	21.8661	21.6083	22.2844	21.2353	8	8	8	7.5	1448	160852
CG7637	H/ACA ribonucleoprotein complex subunit 3	-0.0612521	0.0995891	24.5011	26.0447	26.3376	26.6974	25.7815	25.4322	25.9385	25.7588	9	9	9	89.1	64	7633.82
CG17816	CG17816, isoform D;CG17816, isoform E;CG17816, isoform G	-0.0626154	0.0265725	NaN	NaN	18.8422	NaN	17.9726	19.6265	18.1285	18.1475	1	1	1	2.6	855	93216.9
PpD3	GH12714p	-0.0628047	0.0745722	NaN	19.914	19.7542	19.3333	20.9329	20.9575	20.052	19.8769	2	2	2	6.7	520	59263.7
CG1970-RA	CG1970, isoform A	-0.0650878	0.0488518	NaN	16.8115	19.9261	20.2332	20.49	20.6939	21.5088	20.0186	3	3	3	10.7	468	52921.1
CG11073;CG11073-RA	CG11073, isoform A;CG11073, isoform B	-0.0653391	0.109949	20.9446	19.5915	NaN	17.4282	17.882	17.1085	17.5294	NaN	2	2	2	3.2	755	79435.3
CG12171;CG31548	CG12171;CG31548	-0.0670128	0.0703725	25.4119	24.9255	24.8089	24.0965	24.325	24.1961	25.4268	24.1676	2	2	2	7.8	256.5	27037.5
Tom70	FI03495p	-0.0691264	0.0149707	20.4352	NaN	NaN	NaN	20.7961	20.9762	20.5565	NaN	4	4	4	8.5	589	66364
CG5382	Zinc finger protein-like 1 homolog	-0.0701451	0.0319637	18.1098	15.9986	NaN	NaN	18.7241	19.5515	17.7139	NaN	2	2	2	7.4	299	33503.1
Cdc37	Hsp90 co-chaperone Cdc37	-0.0705128	0.0772922	22.3525	21.3457	21.786	22.0149	23.0458	22.5508	22.6586	21.7192	7	7	7	23.4	389	45149.7
Kap-alpha1	Importin subunit alpha	-0.0710917	0.0365943	18.6815	19.1916	18.6264	18.235	20.0708	19.6331	17.1474	19.511	1	1	1	1.8	543	60009.7
rt	Protein O-mannosyltransferase 1	-0.0715966	0.0356119	NaN	NaN	17.5055	17.6331	18.3133	18.1986	18.5092	NaN	1	1	1	1.2	886	101194
hoip	Hoi-polloi, isoform B;NHP2-like protein 1 homolog	-0.0722351	0.25607	23.4209	23.7825	24.0139	24.1388	24.0836	23.9004	23.86	23.75	6	6	6	76.4	127	13883.1
CG7906	CG7906, isoform A;CG7906, isoform B	-0.0725045	0.0569685	20.4684	20.412	20.2557	20.4466	20.0466	21.56	20.0791	19.7288	2	2	2	6.2	355	38709.7
CG15432-RA	CG15432, isoform A	-0.0739546	0.0745583	22.8681	23.8711	24.1917	24.3311	22.9962	22.8668	23.7127	23.2033	3	3	3	35.6	118	13639.6
14-3-3zeta	14-3-3 protein zeta	-0.0741129	0.288109	25.3132	24.7801	24.6497	24.4659	25.0756	25.428	25.3677	25.0453	11	10	1	41.1	248	28227.6
Rpb5	RE34924p	-0.0742302	0.0853523	21.7168	22.1063	22.0666	22.039	21.6515	21.193	21.0736	20.1912	5	5	5	23.3	210	24484.3
CG31145;CG10187	CG31145, isoform D;CG31145, isoform C;CG31145, isoform A;CG31145, isoform E	-0.0762768	0.0616232	NaN	NaN	NaN	19.2651	NaN	NaN	NaN	NaN	2	2	2	2	840.5	94381.5
Srp14	Srp14, isoform B;Srp14, isoform C	-0.076355	0.0977456	22.1098	22.1155	21.701	22.292	22.3572	22.14	22.4479	22.115	3	3	3	29.4	76	8666.74
CG1091	CG1091, isoform B;CG1091, isoform A	-0.0802207	0.110802	18.6826	19.511	19.6767	19.7576	20.5471	20.2939	19.9762	20.0917	2	2	2	5	532.5	60861.1
Smu1	CG5451	-0.0806522	0.0634594	17.7698	19.1939	18.7701	19.9615	18.545	19.0931	19.0518	17.9543	1	1	1	2	509	57333.6
Prosalpha4	Proteasome subunit alpha type-7-1	-0.0814552	0.122757	23.5264	22.6335	23.0334	22.9345	23.3424	23.5655	23.2605	23.705	7	7	7	40.6	249	27973
crn	Protein crooked neck	-0.0821509	0.330863	25.0361	26.3104	26.3921	26.7681	25.309	25.3515	25.1877	25.4921	33	33	33	48.1	702	84261.8
Nup107	BcDNA.LD18761	-0.0823874	0.19905	20.7233	20.3973	19.579	19.6632	20.5387	20.3961	20.1258	20.0109	3	3	3	4.5	845	97381.9
CG5023	CG5023	-0.0842829	0.161569	23.4918	22.4294	22.6335	22.3033	23.8078	23.7242	23.4741	23.0565	6	6	6	37.9	169	19115.8
CG7358	CG7358, isoform A;CG7358, isoform B;CG7358, isoform C	-0.0902224	0.289735	23.6132	24.8278	24.9999	25.0939	23.7115	23.5284	23.58	23.523	22	22	22	21.8	1139	127761
CG17737	Protein translation factor SUI1 homolog	-0.0906558	0.139678	24.4253	23.909	23.762	23.6842	23.9499	24.0846	24.212	24.229	7	7	7	51.8	110	12450.1
CG4747	CG4747, isoform C;CG4747, isoform B;Putative oxidoreductase GLYR1 homolog	-0.091527	0.238839	24.7556	24.8601	24.6623	24.5467	24.5629	24.4342	24.3522	23.8997	12	12	12	27.2	602	65252
l(3)01239	Lethal (3) 01239, isoform B;Probable prefoldin subunit 2	-0.0924301	0.0932558	20.0088	19.8782	19.5685	19.5662	20.0293	20.6049	20.1406	19.7588	2	2	2	18.9	143	16203.4
CG18259-RA;CG6961	CG18259;CG6961	-0.0925941	0.133765	22.8533	20.2732	20.575	19.9465	21.2201	21.1914	20.7186	20.2189	4	4	4	12.7	474	53048.8
CoVb	Cytochrome c oxidase subunit Vb, isoform A	-0.0938425	0.376	22.3706	21.5812	21.7418	21.772	22.4336	22.4949	22.3099	22.3266	4	4	4	32.5	120	13578.8
Rab2	GH01619p	-0.0943975	0.0666281	18.3979	18.1303	18.2547	18.1099	19.0177	19.4188	20.5915	19.7011	3	3	3	20.2	213	23560.6
Vha26	V-type proton ATPase subunit E	-0.0944223	0.125652	23.5873	22.9222	23.1099	22.3494	23.732	24.1049	24.2442	23.1139	8	8	8	32.3	226	26082.1
RhoGAP1A	Rho GTPase activating protein at 1A, isoform D;GH15984p;Rho GTPase activating protein at 1A, isoform E	-0.0950003	0.126493	NaN	20.0042	19.8804	19.5074	20.6049	20.0354	19.9061	19.7048	3	3	3	2.8	1403	155527
CG4825	CG4825, isoform B;CG4825, isoform A	-0.0952415	0.142788	17.1957	NaN	16.7443	16.4796	17.1509	16.8493	16.9758	NaN	1	1	1	2.4	497.5	56770.5
eIF4G2	Eukaryotic translation initiation factor 4G2	-0.0955601	0.0775733	20.4389	20.4975	20.3512	20.9785	21.4074	20.8132	19.7028	19.8381	4	4	4	3.4	2072	226597
CG6912	CG6912	-0.0977592	0.0593626	NaN	NaN	NaN	NaN	17.5679	NaN	NaN	NaN	2	2	2	6.9	433	47859
eIF3-S10	Eukaryotic translation initiation factor 3 subunit A	-0.0979629	0.340555	25.553	25.4532	25.7847	25.7365	26.0106	26.2942	26.1724	25.9064	47	47	47	34.6	1106	129851
RpS8	40S ribosomal protein S8	-0.0979671	0.440951	27.646	27.8368	27.8824	27.8288	28.096	27.7521	27.8019	27.6828	18	18	18	63.9	208	23759.5
eIF3-S4-1	Eukaryotic translation initiation factor 3 subunit G-1	-0.0985303	0.224951	23.479	23.3945	23.9393	23.9883	24.5589	24.4526	24.2128	23.9087	7	7	7	25.3	269	29946
CG10737;CG10737-RC	CG10737, isoform U;CG10737, isoform S;CG10737, isoform A;CG10737, isoform R;CG10737, isoform Q;CG10737, isoform E;CG10737, isoform N;CG10737, isoform P;CG10737, isoform C;CG10737, isoform O;CG10737, isoform T	-0.0987144	0.0842363	NaN	NaN	15.5077	15.2261	NaN	NaN	NaN	16.3748	1	1	1	2.1	903	98117.6
CG7920	CG7920, isoform A	-0.0993552	0.755695	27.6038	27.5436	27.7855	27.5875	27.7314	27.8227	27.7114	27.7935	20	20	20	53	477	51854.5
Txl	AT08565p	-0.0999575	0.412939	22.4322	22.1893	22.2175	22.0491	22.9485	22.9497	23.2035	23.0688	5	5	5	19.5	287	31728
RpS17	40S ribosomal protein S17	-0.100425	0.345732	27.4264	27.5568	28.0013	28.5199	27.9429	27.8926	27.9465	27.9382	10	10	10	70.2	131	15284.7
CoVIb	Cytochrome c oxidase subunit VIb, isoform B;Cytochrome c oxidase subunit VIb, isoform A	-0.103539	0.131686	21.49	19.7934	19.9476	20.5766	20.8328	20.8146	20.2848	20.288	4	4	4	53.2	86.5	10355.1
Srp68	Signal recognition particle subunit SRP68	-0.106163	0.345305	22.4125	22.643	22.8114	22.8838	23.548	23.4442	23.5412	23.2691	14	14	14	27.2	604	69008.8
CG14074	CG14074	-0.106305	0.0735119	NaN	16.7681	NaN	17.2554	NaN	NaN	NaN	NaN	1	1	1	3.9	336	38084.8
hpo	Serine/threonine-protein kinase hippo	-0.11038	0.132891	NaN	18.1108	18.8779	18.9147	18.8693	20.07	19.8358	19.1118	2	2	2	3.7	669	75109.7
LBR	Lamin-B receptor	-0.111755	0.597966	22.5775	22.0972	22.066	21.7333	22.0635	21.9207	21.9925	21.825	7	7	7	14.2	728.5	81710
CG1316	CG1316	-0.11336	0.395908	23.3819	23.187	23.7074	23.4147	23.0368	23.3839	23.4664	23.2541	10	10	10	23.8	470	52452.7
NHP2	NHP2, isoform B;H/ACA ribonucleoprotein complex subunit 2-like protein	-0.11356	0.167169	24.1223	25.3552	26.086	25.7874	24.7577	24.7966	25.7914	24.8563	7	7	7	56.2	160	17723.6
enok	Enoki mushroom	-0.114715	0.170331	19.4421	19.5692	19.748	19.9984	19.3711	19.3403	19.2605	20.109	3	3	3	1.5	2291	254682
D19A	D19A	-0.114808	0.34281	20.755	20.6276	20.7787	20.9469	20.0411	20.4858	20.1987	20.4514	5	5	5	6.9	845	96196.5
Hrb98DE	Heterogeneous nuclear ribonucleoprotein A1;Heterogeneous nuclear ribonucleoprotein at 98DE, isoform C	-0.116281	0.276224	26.6629	26.3935	26.4815	26.3375	26.4762	26.2188	26.0626	26.2703	14	14	1	53.9	364.5	39037.9
Syp	CG17838, isoform F;CG17838, isoform B;CG17838, isoform H;CG17838, isoform A	-0.116405	0.679702	26.5583	26.5273	26.7456	26.4478	26.5532	26.5875	26.316	26.545	25	25	0	50.5	548.5	61650.4
CG4500	Long-chain-fatty-acid--CoA ligase bubblegum-like	-0.11688	0.192613	20.889	19.0124	19.6438	19.3813	20.4173	20.7537	20.5445	20.3223	4	4	4	7.8	681	75151.6
CG31368	CG31368, isoform C;CG31368, isoform D	-0.117145	0.494295	25.5021	26.6369	26.837	26.8754	25.3037	25.604	25.4796	25.2019	39	39	39	36	1484.5	172173
eIF-4B	Eukaryotic initiation factor 4B;Eukaryotic initiation factor 4B, isoform E;Eukaryotic initiation factor 4B, isoform F	-0.117285	0.26197	22.2553	22.3135	22.5149	22.1536	22.4156	22.3027	22.4172	22.7443	10	10	10	23.5	391	44375.3
P5cr-2	CG5840, isoform B;Pyrroline-5-carboxylate reductase	-0.11902	0.0818964	NaN	18.3782	17.6243	17.16	NaN	NaN	NaN	18.266	2	2	2	13.8	223.5	23050.6
CG13056-RA	CG13056	-0.120362	0.0508636	23.8543	22.2299	23.1451	21.7581	22.577	21.7897	21.6719	19.503	2	2	2	32.3	99	11190
Iswi	Chromatin-remodeling complex ATPase chain Iswi	-0.121294	0.254405	23.1753	23.7051	23.6951	23.8158	23.2777	24.0598	23.5912	23.2078	19	19	19	20.2	1027	118873
CRMP	BcDNA.HL02693;Collapsin response mediator protein	-0.12153	0.313381	22.554	22.0385	21.9089	21.732	22.4123	22.5351	22.2087	21.9522	10	10	10	19	591.5	64765.9
blanks	Blanks	-0.122485	0.133125	19.2706	19.0393	19.196	19.7565	20.0366	20.6109	20.1699	19.7017	4	4	4	13	324	35624.9
Phb2	Lethal (2) 03709, isoform E;LD46344p;Lethal (2) 03709, isoform D	-0.122992	0.183367	22.6122	21.6286	22.1611	21.5396	22.7625	22.6527	22.5673	21.9016	13	13	13	41.1	303	33493.6
Nup93-1	Nucleoporin 93kD-1	-0.12321	0.26082	20.6603	20.58	20.7634	20.8958	20.494	20.6858	20.3498	20.1402	5	5	4	7.5	823	93852.4
RpS7	40S ribosomal protein S7;GM06992p	-0.12389	0.520102	28.4633	28.9543	28.8053	28.6609	28.9348	28.6253	28.701	28.9002	18	18	18	76.8	222	25258.2
sn	Singed, isoform B;Protein singed	-0.124358	0.107652	23.3753	21.8278	21.3389	21.8182	22.455	22.045	23.6001	22.1237	10	10	10	24.2	512	57279.1
Men	Malic enzyme	-0.129415	0.130182	21.7486	21.0321	20.9231	20.8387	21.2896	21.369	22.4713	22.0604	8	8	8	10.7	761	84496.4
ATPsyn-beta	ATP synthase-beta, isoform D;ATP synthase subunit beta;ATP synthase subunit beta, mitochondrial	-0.129475	0.609774	27.3449	27.1464	26.9798	26.8837	27.4264	27.7141	27.901	27.691	21	21	21	59.6	505	54108
CG1785	Uncharacterized protein CG1785	-0.130285	0.0689546	18.16	NaN	18.2751	19.6756	18.1544	18.2963	18.245	18.3111	1	1	1	4.4	478	55788.4
Taf8	Transcription initiation factor TFIID subunit 8	-0.131903	0.813984	24.3594	25.5467	25.4383	25.4147	25.125	25.2889	25.2697	25.1021	12	12	12	31.1	328	36649.5
Rpn12	26S proteasome regulatory complex subunit p30	-0.136363	0.284036	18.7023	18.4466	18.9708	18.5787	19.143	18.8409	19.0635	19.2359	2	2	2	8	264	30224.9
gammaCop	Coatomer subunit gamma	-0.137965	0.270231	22.964	22.1733	22.6743	22.9966	23.7551	23.8055	23.5255	23.2663	11	11	1	18.1	881	97483.6
Cpr65Av	Cuticular protein 65Av	-0.139337	0.0750944	NaN	NaN	16.0563	NaN	NaN	NaN	NaN	NaN	1	1	1	10.8	111	12062.1
Brms1	BRMS1 ortholog	-0.139698	0.0604617	NaN	18.232	18.3842	17.9138	NaN	NaN	NaN	NaN	1	1	1	5	259	29560.4
mgr	Prefoldin subunit 3	-0.140983	0.127242	18.4205	17.6644	17.9538	17.7992	18.6207	19.5547	19.3276	18.1096	2	2	2	10.8	194	22314.4
Cct5	GM12270p;T-complex chaperonin 5, isoform B	-0.142057	0.36628	24.885	24.9029	24.7765	24.7766	25.5252	25.7952	25.9995	25.4567	25	25	24	49.8	527	57535.3
nonA	No on or off transient A, isoform D;Protein no-on-transient A;No on or off transient A, isoform B	-0.14254	0.245057	23.1168	22.5557	22.6387	22.4211	22.0202	22.558	22.075	22.1073	15	15	14	29.1	700	76997.6
CG16940;CG16940-RC	CG16940, isoform A;CG16940, isoform C	-0.1436	0.444905	21.626	21.3201	22.8079	22.0497	21.837	22.1257	21.6063	21.8766	4	4	4	3.6	1038	117533
Prp19	BcDNA.LD02793	-0.143995	0.408524	29.2044	30.11	30.2876	30.4617	29.2903	29.1876	29.1777	29.4916	29	29	29	69.1	505	55198.9
faf	Probable ubiquitin carboxyl-terminal hydrolase FAF	-0.144853	0.335612	18.8892	19.4277	18.0117	18.0544	19.0833	19.0276	19.3182	19.0086	3	3	3	1.4	2744.5	307612
Cctgamma	Cctgamma, isoform B;T-complex protein 1 subunit gamma	-0.145007	0.50879	24.7969	24.8547	24.7098	24.827	25.3668	25.4884	25.7613	25.7686	24	24	24	53.1	544	59394.8
U4-U6-60K	SD09427p	-0.1465	0.530797	23.5769	24.5898	24.5045	24.6054	23.9707	23.8915	23.7892	23.8787	17	17	17	35.1	553	61563.6
Patr-1	Protein associated with topo II related-1	-0.146898	0.340368	18.582	18.2744	18.8093	19.8831	18.4707	18.8959	18.6357	18.6127	2	2	2	3	968	108219
eIF-2gamma	Eukaryotic translation initiation factor 2 subunit 3	-0.147502	0.687998	23.0736	21.943	22.3559	22.3356	22.9176	23.0452	22.808	22.7808	11	11	11	22.9	471	50981.7
dre4	FACT complex subunit spt16	-0.1481	0.25146	25.3695	26.3163	26.4003	26.5124	26.2666	25.9196	26.7113	26.4187	39	39	39	33.6	1102.5	125682
sqd	RNA-binding protein squid	-0.150427	0.33391	24.1191	24.6164	24.4375	24.3979	24.3943	24.4067	24.4006	24.9524	8	8	8	31.2	321	35003
REG	LD45860p	-0.152875	0.431726	22.5279	23.2554	23.0867	23.6568	23.1215	23.1047	23.1151	23.4188	7	7	7	33.5	245	28121.7
RpS15	RE08270p;Ribosomal protein S15, isoform B	-0.153797	0.87618	27.4744	27.3764	27.4054	27.5793	27.5448	27.6753	27.6158	27.6507	7	7	7	44.6	147.5	17008.1
wds	Will die slowly, isoform B;Protein will die slowly	-0.153988	0.0616666	20.0618	19.9647	19.3263	19.5709	19.4955	18.8311	NaN	19.4722	4	4	4	13.9	361	39041.2
CG11739	AT24389p	-0.155287	0.580437	23.0666	23.5161	23.7549	23.6902	24.1548	24.5765	24.3757	24.0827	12	12	12	29	321	35743.8
Doa	Darkener of apricot, isoform R;Darkener of apricot, isoform V;Darkener of apricot, isoform M;Darkener of apricot, isoform N;Darkener of apricot, isoform Q;Darkener of apricot, isoform W;105 kDa Doa protein kinase;Darkener of apricot, isoform P;Serine/threonine-protein kinase Doa	-0.15627	0.128256	19.3129	20.0767	21.1901	21.9582	20.3676	21.588	20.6961	20.3869	7	7	7	7.4	599	70258.3
RpS4	Ribosomal protein S4, isoform C;40S ribosomal protein S4	-0.156581	0.457043	27.8072	27.9967	28.0121	28.0192	27.6988	27.718	27.9735	28.104	23	23	23	67.4	261	29134.2
RpS3A	40S ribosomal protein S3a	-0.158685	0.765096	27.942	28.2535	28.1603	28.2273	28.1515	28.4407	28.3387	28.1807	25	25	25	71.3	243	27580.9
blw	ATP synthase subunit alpha, mitochondrial	-0.16063	1.93057	27.9988	27.7931	27.743	27.508	28.0436	28.1931	28.0581	28.152	32	32	32	53.8	552	59421.5
bsf	Bicoid stability factor	-0.160928	0.29334	20.8358	21.0565	21.4515	20.9471	21.3392	22.1114	22.1095	21.4008	8	8	8	6.6	1412	157264
whd	LD31742p;Carnitine palmitoyltransferase I	-0.161345	0.175264	21.3069	20.8849	21.265	20.8896	22.2983	20.9073	21.5673	22.09	6	6	6	12.8	781	89467.1
CG10777	CG10777, isoform B	-0.161584	0.45044	24.3894	23.689	23.2383	23.0329	23.4956	23.0609	23.5624	23.3297	12	10	10	16.9	945	100418
CG10470	CG10470	-0.161602	0.423226	20.3703	20.3342	19.8335	20.0871	20.496	20.6776	20.1612	20.2303	1	1	1	7.7	183	20845.3
SmD1	Probable small nuclear ribonucleoprotein Sm D1	-0.161868	0.210872	26.5308	27.0939	26.9982	27.4162	26.5014	25.838	26.3007	25.6766	4	4	4	52.4	124	13796
Ge-1	Enhancer of mRNA-decapping protein 4 homolog	-0.162013	0.194929	22.0031	22.708	22.68	22.8396	22.168	22.974	22.6336	21.9257	14	14	14	10.6	1354	149251
CG6841	CG6841	-0.169475	0.697333	24.3703	25.2129	25.3202	25.6141	24.8519	24.8594	25.0745	24.9949	31	31	31	35.3	931	105228
CG3967	Alpha-tubulin N-acetyltransferase 1;Alpha-tubulin N-acetyltransferase	-0.17011	0.445423	20.9482	20.9566	21.1806	20.8427	21.1946	21.3036	20.7893	21.2825	5	5	5	13.7	291	32015
BG:DS00180.3	CG16884	-0.170887	0.1252	26.9476	26.035	24.0874	26.9391	25.1838	23.513	23.6052	24.4041	8	8	8	29.6	277	29702.5
Argk	Arginine kinase, isoform G;Arginine kinase;Arginine kinase, isoform E	-0.1718	0.346304	29.6482	27.942	27.9573	27.4126	28.9396	28.9736	29.1241	28.4694	41	41	41	78.1	385.5	42975.2
Dip-B	Dipeptidase B, isoform A	-0.172557	0.220632	25.2789	24.4593	24.3211	24.1331	24.7578	24.679	25.602	24.7907	15	15	15	38.2	508	55534.1
CG2970	CG2970	-0.173372	0.0558989	17.5978	17.3633	18.7201	19.8088	17.1034	17.6362	20.752	21.1171	6	6	6	19.4	366	40531.5
SRm160	FI04407p	-0.173977	0.426509	27.9349	29.0823	29.2817	29.4016	28.3336	28.2598	28.1208	27.9469	21	21	21	17.1	954	107593
CG6664	CG6664, isoform A	-0.173978	0.246197	19.9731	19.2657	19.2278	19.0769	19.5139	18.7278	19.8946	19.5647	4	4	4	6.8	532	57806.6
Obp99c	Odorant-binding protein 99c	-0.174698	0.228045	21.6975	22.1806	21.6504	20.7114	21.4415	21.7587	21.8781	22.1033	5	5	5	35.8	151	16998.6
RpS9-RA;RpS9	LD13662p;40S ribosomal protein S9;LD32106p	-0.175095	0.270752	26.6483	26.9685	27.0326	26.873	26.6143	26.87	27.4282	27.067	20	20	20	62.1	195	22623.5
eIF2B-beta	EG:100G10.3 protein	-0.17611	0.590553	18.5565	18.9177	18.9642	18.9872	19.0864	18.9732	19.0015	19.3034	2	2	2	10.8	352	39154.1
Mical	Protein-methionine sulfoxide oxidase Mical	-0.176395	0.335886	20.6037	18.7204	19.3572	19.6831	19.6808	19.1771	19.7036	20.139	4	4	4	1.1	2734	301484
CG6197-RA	CG6197	-0.178423	0.49415	25.4034	26.5627	26.5707	26.7547	25.437	25.5269	25.9206	25.7613	29	29	29	32.2	883	103327
CG10038	UPF0528 protein CG10038	-0.179165	0.0698087	NaN	18.4344	18.3494	18.1742	18.388	18.7672	18.7027	18.9517	1	1	1	5.8	317	35517.2
CG2807	CG2807, isoform A	-0.179262	1.3774	24.1125	25.1834	25.0195	25.2316	24.414	24.1589	24.2139	24.291	29	29	29	25.4	1340	149638
Prosalpha3	Proteasome subunit alpha type-4	-0.179987	0.384129	21.5489	20.9982	21.5633	21.3371	21.8798	21.7722	22.3724	21.5065	4	4	4	13.6	264	29411.7
dsx-c73A	Doublesex cognate 73A	-0.182133	0.102501	24.7777	23.798	22.7815	22.3667	23.7993	22.1472	20.6309	22.2476	10	10	10	21.5	852	91730.8
CAP	CAP, isoform E;CAP, isoform G;CAP, isoform D;CAP, isoform J;CAP, isoform K;CAP, isoform I;CAP, isoform F;CAP, isoform C;CAP, isoform B;CAP, isoform R;CAP, isoform L;CAP, isoform A;CAP, isoform Q	-0.183418	0.224366	18.0727	19.9052	19.6611	20.125	20.1577	21.0477	20.3109	19.9155	4	4	4	19.8	811	91273.7
Sply	Sphingosine-1-phosphate lyase	-0.184832	0.120422	17.3486	17.1986	17.7767	16.8004	17.4034	18.5021	17.7592	NaN	2	2	2	4.8	545	60305.2
Tps1	BcDNA.GH08860	-0.189387	0.865377	24.6827	24.7221	24.6796	24.295	24.6573	25.0983	25.0563	24.8337	21	21	21	31.1	809	91134.9
CG15084	Coiled-coil domain-containing protein 130 homolog	-0.190022	0.65824	19.4351	20.6392	21.2575	21.2007	19.8495	19.9771	20.142	19.7191	5	5	5	15.8	316	36340.4
SmF	Small nuclear ribonucleoprotein F	-0.190505	0.250205	23.5692	25.302	25.2061	25.382	24.1526	24.1543	23.094	23.8611	4	4	4	59.1	88	9739.17
Es2	Protein DGCR14 homolog	-0.190745	0.911998	22.1076	23.4833	23.2666	23.526	22.2011	22.2599	21.8458	22.0305	14	14	14	34.5	501	56019.3
Srp19	Signal recognition particle 19 kDa protein	-0.190982	0.34955	21.7568	20.8003	20.85	21.4318	21.3768	21.3391	20.8124	21.1037	5	5	5	43.8	160	18394.9
PQBP1	CG11820	-0.191143	0.0692976	NaN	18.2637	18.6841	18.8599	NaN	NaN	NaN	16.9756	1	1	1	3.9	231	27072.5
Prp3	Precursor RNA processing 3, isoform A;Precursor RNA processing 3, isoform B	-0.191245	0.431491	22.863	23.7294	23.5231	23.7201	23.1037	22.9546	23.7268	22.9504	16	16	16	24.7	563	63760.7
CG14564	CG14564	-0.193475	0.085722	24.2096	20.5671	20.7506	19.2502	21.6031	21.9062	22.3585	19.4769	2	2	2	7.7	274	29378.7
CG7971	CG7971, isoform A;CG7971, isoform C;CG7971, isoform F	-0.194855	0.770577	27.2469	28.182	28.5513	28.8158	27.6619	27.3914	27.3185	27.0789	34	34	34	27.9	1107	127280
Jabba	CG42351, isoform B	-0.195472	0.318928	NaN	21.1178	22.0302	21.5892	21.3024	21.1094	21.6049	22.0847	9	1	1	33.1	320	35961.8
CG2064	CG2064	-0.196819	0.096657	NaN	16.5694	16.9412	17.4394	NaN	18.5878	18.4316	17.9837	3	3	3	9.7	330	36581.3
Mdh2	CG7998	-0.198509	0.357826	22.301	21.7755	21.7419	21.2485	22.2603	22.1919	23.1852	22.5699	9	9	9	28.3	336	35317.9
CHKov1	CHKov1, isoform F	-0.199389	0.0408163	20.5524	20.037	19.8836	19.701	20.4981	20.9966	20.6351	NaN	3	3	3	10.6	397	44105.6
tacc	Transforming acidic coiled-coil protein, isoform E;Transforming acidic coiled-coil protein, isoform B;Transforming acidic coiled-coil protein, isoform A;Transforming acidic coiled-coil protein, isoform D;LD15470p	-0.199963	0.291102	19.4857	19.114	19.5123	18.6556	19.5619	20.3361	19.7106	19.041	3	3	3	11.8	1226	136561
tn	Another B-box affiliate, isoform A;Another B-box affiliate, isoform C	-0.201573	0.370185	19.4589	20.9435	20.9531	21.5849	21.1697	20.9143	20.8444	21.692	10	10	10	9.9	1435	154927
CG7834	CG7834, isoform A	-0.202947	0.88731	25.4987	25.5537	25.5515	25.2449	26.0809	26.2255	26.0296	25.7124	17	17	17	69.6	253	27217.7
Zw	Glucose-6-phosphate 1-dehydrogenase;Zwischenferment, isoform C	-0.204648	0.113385	18.6893	21.1486	20.2758	20.1061	19.5677	21.7425	21.1929	21.6005	3	3	3	9.4	502	58008.1
l(2)35Df	L.2.35Df	-0.204945	0.68166	19.052	19.0055	19.7757	19.2921	18.8956	19.3954	19.0292	18.9771	3	3	3	3.7	1055	118925
Cht5	Cht5	-0.208415	0.249453	22.8057	20.9569	20.6078	18.9213	19.8981	19.3589	20.3976	19.9597	5	5	5	8.2	595	67050.7
Myo10A	Myosin 10A, isoform C;Myosin 10A, isoform D	-0.208427	0.308726	22.2852	21.7833	21.8899	22.1057	22.1929	21.6209	21.1697	21.3773	8	8	6	3.5	3099.5	344311
CG4612	CG4612	-0.208845	0.359863	21.3654	20.4269	20.8879	20.24	20.4382	20.7366	19.8753	20.0814	2	2	2	6.5	307	33660.4
M1BP	CG9797	-0.208955	0.886958	19.104	19.4074	19.9191	19.7411	18.9184	18.8325	19.256	18.9027	2	2	2	6	418	48093
Dcr-2	Dicer-2	-0.209037	0.331627	21.0881	22.5951	21.8344	21.2629	21.2929	21.892	21.7376	22.2124	5	5	5	4.2	1722	197765
nito	BcDNA.GH11110	-0.209198	0.574524	25.2071	25.7703	25.6917	25.5636	25.3333	24.976	24.822	24.7133	22	22	22	29.5	793	89053
T3dh	Probable hydroxyacid-oxoacid transhydrogenase, mitochondrial	-0.211952	0.0689547	19.323	NaN	NaN	NaN	19.8553	20.0257	21.0723	NaN	3	3	3	8.8	464	50017.9
RpS18	40S ribosomal protein S18	-0.212542	0.80497	27.7104	27.7771	27.95	28.0308	27.6506	27.5886	27.9109	27.7259	20	20	20	70.4	152	17611.5
Adk3	Adenylate kinase isozyme 3	-0.214793	0.508682	23.556	22.9005	22.7817	22.7936	22.9914	23.4085	23.9052	23.3778	9	9	9	42.6	216	24145.2
lark	RNA-binding protein lark	-0.215716	0.33696	24.3724	24.4545	24.675	24.6861	24.1171	23.834	24.3163	23.2534	23	23	23	64.2	352	39911.9
Uba2	LD22577p	-0.215978	0.406675	19.4752	19.9431	20.1993	20.659	20.8466	20.5794	20.7613	20.4376	5	5	5	11.7	700	77611.1
CG42748	CG42748, isoform E;CG42748, isoform F;CG42748, isoform H;CG42748, isoform L;CG42748, isoform M;CG42748, isoform D;CG42748, isoform B;CG42748, isoform J;CG42748, isoform G;CG42748, isoform K	-0.216977	0.394913	18.2296	18.8982	18.0914	18.3061	19.1165	18.3515	18.6941	18.0646	2	2	2	5.7	1637.5	181013
flr	Actin-interacting protein 1	-0.218111	0.432692	22.1182	21.6521	21.4397	21.5218	22.203	21.9026	22.8542	22.4613	14	14	14	34.5	606	66330.7
Hsc70Cb	Hsc70Cb, isoform A;Hsc70Cb, isoform G	-0.219168	1.77861	23.7745	23.9098	23.8065	23.6155	24.1434	24.1904	24.1848	24.3311	20	20	20	29.1	820	90201.8
regucalcin	Regucalcin homologue;Regucalcin, isoform D	-0.219333	0.374335	26.4389	25.3769	24.7653	24.1766	24.9765	25.7394	25.9958	25.454	18	18	18	68	311	34502.2
Dcp1	Decapping protein 1, isoform A	-0.219357	0.719605	21.028	22.3496	21.4742	21.2329	21.3267	21.179	20.8283	20.8625	4	4	4	12.6	372	41359.3
pUf68	Poly(U)-binding-splicing factor half pint;Poly U binding factor 68kD, isoform D	-0.219885	0.441945	25.9807	26.5962	26.6503	26.754	25.3842	26.094	25.9404	25.9752	26	26	26	47.6	545	57989.5
CG3902-RA	CG3902	-0.220545	1.30915	24.5831	24.253	24.4769	24.3063	25.3034	25.3956	25.561	25.4327	16	16	16	49.8	414	45366.1
ras	Inosine-5'-monophosphate dehydrogenase	-0.222338	0.0783525	NaN	NaN	NaN	18.0339	NaN	NaN	NaN	18.4414	2	2	2	3.5	537	57829.3
endos	Endosulfine, isoform A	-0.223832	0.826936	20.2416	20.2815	20.5169	20.5006	20.2581	20.3008	20.5322	20.3904	3	3	3	23.5	119	12949.5
CG9548	Uncharacterized protein CG9548	-0.224652	0.27616	20.4784	22.1343	22.4817	22.6189	20.7151	21.1991	21.8549	20.6544	4	4	4	33.3	111	12522.4
Vps37B	CG1115	-0.225838	0.583608	19.495	19.1809	18.9426	19.3147	19.229	19.6093	19.7042	19.5077	2	2	2	10.7	214	24262.5
RhoGAPp190	Rho GTPase activating protein p190, isoform D;Rho GTPase activating protein p190, isoform E;Rho GTPase activating protein p190, isoform F;Rho GTPase-activating protein 190;Rho GTPase activating protein p190, isoform G	-0.227394	0.2835	18.5585	18.4076	18.535	18.3383	18.4937	18.4539	18.8245	17.7003	4	4	4	2.7	1564	179086
RpS11	40S ribosomal protein S11	-0.227558	0.673497	26.6172	27.063	27.6053	27.3803	27.2473	27.4732	27.302	27.0404	14	14	6	53.5	155	18105.3
CG9914	CG9914, isoform A	-0.227735	0.256913	22.0812	20.261	20.5168	20.7608	21.9099	22.7138	22.1542	21.0726	7	7	7	26.3	315	34786.3
RpS6	40S ribosomal protein S6	-0.229023	1.13307	27.1783	27.3945	27.6487	27.6684	27.4812	27.3698	27.5978	27.202	21	21	6	54	248	28407.4
Dref	DNA replication-related element factor, isoform A	-0.230653	0.247796	20.8259	19.9458	20.1621	20.1642	20.3535	19.902	21.2983	19.6796	5	5	5	8.7	709	80726.8
CG7033	CG7033	-0.232315	0.605538	25.1651	25.3738	25.2306	25.5565	25.7542	26.3279	26.56	26.1506	27	27	27	51.6	535	58063.9
SmD2	Probable small nuclear ribonucleoprotein Sm D2	-0.233522	0.608553	24.7715	25.5546	25.9251	26.3183	24.9664	25.2939	25.1131	25.058	10	10	10	66.4	119	13503.9
porin	Porin, isoform D;Voltage-dependent anion-selective channel	-0.237442	0.488226	24.7806	24.1085	23.7132	23.1138	24.0211	23.9658	24.7257	24.469	14	14	14	55	282	30550
tral	Trailer hitch, isoform E;Trailer hitch, isoform G;Trailer hitch, isoform D;Trailer hitch, isoform I;GH08269p;Trailer hitch, isoform F;Trailer hitch, isoform C;Trailer hitch, isoform H	-0.237477	0.966221	25.0623	24.3691	24.0637	24.2626	24.2533	23.955	23.9039	23.7878	15	15	15	36.9	649.5	69072.1
RpL11	60S ribosomal protein L11	-0.237937	0.563661	26.6777	26.4592	26.6626	26.7619	26.5189	26.6705	27.1324	26.6555	12	12	12	44	184	21112.4
CG6891	CG6891, isoform A;CG6891, isoform B	-0.238081	1.20012	22.8929	21.7476	22.1406	22.1176	22.7346	22.5935	23.0491	22.7443	6	6	6	39.9	154.5	17582.4
coro	Coronin	-0.239067	0.424803	23.4094	22.7448	22.4875	22.3658	22.6135	23.0554	22.9769	22.6074	12	12	12	28.8	528	57268.4
pont	RuvB-like helicase 1	-0.240088	0.861063	24.3512	24.5969	24.2768	24.7941	23.8347	24.3672	24.3808	24.4266	11	11	11	33.6	456	50242.1
Nup43	CG7671	-0.240394	0.635311	19.2263	18.7744	19.2198	18.7349	17.965	18.2539	NaN	18.6342	2	2	2	6.7	358	40148.1
CG15780	CG34434	-0.24087	0.119432	NaN	NaN	NaN	NaN	NaN	NaN	NaN	NaN	1	1	1	4.8	460	45054.9
CG8665-RA	CG8665	-0.243003	0.361293	20.7136	20.2222	20.8581	20.5063	22.5845	22.1436	23.3865	22.2094	12	12	12	16.9	913	100298
atms	Antimeros	-0.243807	1.61947	29.7892	30.8385	30.8732	31.1628	30.414	30.5166	30.4564	30.4269	35	35	35	64.9	538	60794.1
RpL30	RE25263p	-0.244035	0.51713	25.2641	26.1928	26.1584	26.1769	25.6173	26.4381	26.2754	26.2101	9	9	9	63.1	111	12234.3
Eb1	Eb1, isoform A;Eb1, isoform E;Eb1, isoform F	-0.245168	0.816456	24.6561	24.3743	24.5268	24.737	24.7377	24.9301	25.0044	24.7496	20	20	20	71.8	291	32575.7
Cyp4s3	Probable cytochrome P450 4s3	-0.245347	0.176114	NaN	NaN	NaN	NaN	NaN	NaN	NaN	NaN	1	1	1	2.2	495	57189.3
CG8602	CG8602, isoform A	-0.24632	0.57529	20.7252	20.4294	20.7681	21.0262	21.8046	21.6815	21.9797	21.9468	4	4	4	10.9	478	53299.4
CG1458	CDGSH iron-sulfur domain-containing protein 2 homolog	-0.246816	0.0703745	19.6584	19.4423	19.2338	19.0524	19.596	20.6496	20.5953	18.6335	2	2	2	16.5	133	14632.9
DMAP1	DMAP1	-0.248509	0.882318	18.5223	18.8044	NaN	19.2335	18.2954	18.0732	18.2807	18.4825	1	1	1	4.4	433	50248.3
RpL7	Ribosomal protein L7, isoform B;60S ribosomal protein L7	-0.250403	0.918872	27.1504	27.3505	27.3234	27.2911	27.43	27.6031	27.5402	27.3362	20	20	20	50.8	252	29552
CSN7	COP9 signalosome complex subunit 7	-0.250937	0.491189	NaN	NaN	18.817	18.9985	18.4239	19.0916	18.9891	NaN	5	5	5	25.9	278	31067.7
CG4914	CG4914	-0.251392	0.300371	21.9382	22.0433	18.7955	19.4029	18.9593	17.5471	17.5599	18.0932	3	3	3	11.5	374	41498.1
CG6015	CG6015	-0.251645	0.846265	26.0424	27.294	27.4415	27.6276	26.4201	26.5523	26.5112	26.149	41	41	41	72.2	576	65432.7
cpb	Capping protein beta, isoform B;F-actin-capping protein subunit beta	-0.252157	0.555227	21.3585	21.2933	21.1605	21.145	21.7787	21.5509	21.8614	22.1588	6	6	6	18.5	276	31363.4
CG6356	CG6356	-0.253877	0.217037	18.2817	18.7588	18.3584	18.6322	19.3027	19.8746	20.7825	19.1704	2	2	2	5.8	570	62903.8
RpL15	Ribosomal protein L15;60S ribosomal protein L15	-0.254757	0.594353	26.233	26.5142	26.4428	26.7068	26.5812	26.607	26.6637	26.9071	12	12	12	45.1	204	24325.3
CG4069	CG4069	-0.255589	0.0946917	NaN	19.3418	19.6463	21.0236	20.0311	NaN	20.8679	18.7052	3	3	3	6.3	509	56351.3
Rox8	Rox8, isoform B;FI04408p	-0.255713	0.83829	18.8815	17.4692	17.0187	17.0727	17.6477	17.1351	17.3968	17.3523	1	1	1	4.1	467	49885.6
CG8833	G patch domain-containing protein 1 homolog	-0.256505	0.723137	25.1754	26.1453	26.155	26.5009	25.2192	24.8586	24.6469	24.7572	28	28	28	37	952	107899
betaCop	Coatomer subunit beta	-0.258685	1.14084	22.7458	22.3735	22.5277	22.5785	22.6411	23.1722	23.0553	22.9565	10	10	10	12.8	964	107407
r	Rudimentary, isoform C;CAD protein	-0.26045	0.596394	22.6913	22.9654	23.175	23.6506	23.1746	23.5217	23.8424	24.1125	9	9	9	5.2	2224	246672
dock	Dreadlocks, isoform A;Dreadlocks, isoform B	-0.260488	1.09567	18.779	18.2667	18.117	18.1028	18.2129	18.5019	18.2613	18.1446	3	3	3	12	479	53028.4
Gp93	Glycoprotein 93	-0.260568	0.626327	26.2072	25.2692	25.4352	25.2517	26.5421	26.7448	26.5983	25.8994	31	30	30	42.6	787	90238.7
CG14109	CG14109, isoform A	-0.260693	0.419396	19.7789	17.8325	17.6525	18.6454	18.6264	18.7464	18.7132	18.2362	2	2	2	11.1	243	27232.7
CG12736	AT01345p	-0.261157	0.150022	19.1804	18.8335	19.5047	19.4958	19.0452	19.612	19.851	NaN	3	3	3	9.2	456	49673.2
Mct1	EG:103B4.3 protein	-0.26124	1.96717	21.3427	22.0687	22.2151	22.4268	22.8856	22.9084	22.6399	22.7786	6	6	6	15	626	67913.6
Rop	Ras opposite, isoform B;Protein ROP	-0.263022	1.08411	22.7036	22.4091	22.7784	22.8333	23.5487	23.515	23.3133	23.7032	6	6	6	12.1	597	67850.9
Cdc5	Cell division cycle 5 ortholog, isoform A	-0.263593	1.3286	27.5803	28.3418	28.4269	28.812	27.6241	27.4215	27.2567	27.4572	50	50	50	67.6	814	93085.5
RpS26	Ribosomal protein S26, isoform D;40S ribosomal protein S26	-0.26701	0.496645	25.6526	26.6905	26.2818	26.5231	26.2692	26.012	26.2426	26.9117	3	3	3	31.6	114	13266.6
Ent2	Equilibrative nucleoside transporter 2, isoform A	-0.26923	0.700534	17.8101	17.3388	17.5925	18.252	18.6217	18.3341	18.0538	18.0542	1	1	1	3.1	458	51324.2
Mhc	Myosin heavy chain, muscle	-0.269382	0.236352	21.9515	19.9219	19.3672	19.7686	19.5087	20.1681	21.1332	21.2583	173	2	0	65.9	1962	224528
SmE	Probable small nuclear ribonucleoprotein E	-0.270325	0.675885	24.6804	26.2156	26.3294	26.364	24.6205	25.1961	24.4517	25.1491	4	4	4	58.5	94	11095.9
row	RE01954p;LD21608p	-0.271134	0.604202	20.4718	20.4879	20.5914	20.3223	19.9368	20.6256	20.0895	19.745	5	5	5	4.6	941.5	105357
Hrb87F	Heterogeneous nuclear ribonucleoprotein at 87F, isoform C;Heterogeneous nuclear ribonucleoprotein 87F	-0.271623	0.705903	24.9779	24.6763	24.4743	24.6906	24.7516	24.4539	23.9773	24.2919	12	10	10	39.2	385	39499.4
D19B	D19B	-0.272132	0.282983	20.2375	20.2931	20.1608	20.6498	20.2791	19.5064	19.1083	19.8391	3	3	3	7	774	87895.5
CG2145	CG2145, isoform B;Poly(U)-specific endoribonuclease homolog	-0.272617	0.500671	22.3921	21.8806	21.4746	21.1905	21.2564	21.766	21.129	21.7893	9	9	9	17.2	592	63596.4
CG3223	CG3223	-0.273913	0.527241	18.4978	18.8086	18.8466	18.6822	19.2356	19.1912	18.385	18.7216	2	2	2	11.6	415	45123.2
noi	Splicing factor 3A subunit 3	-0.275707	0.977782	22.6532	24.1225	24.4337	24.3802	23.3261	23.3825	23.4275	23.4674	11	11	11	27.6	503	58421.7
Nipped-B	Nipped-B, isoform G;Nipped-B protein	-0.276755	0.498572	21.3007	19.2757	19.2014	19.4145	19.9245	19.1234	18.9053	18.9815	5	5	5	3.2	2065	235306
CG31729;CG31729-RA;CG6263	CG31729, isoform D;CG31729, isoform C;CG31729, isoform A;CG31729, isoform B	-0.277268	0.0802742	NaN	17.9088	18.0212	18.271	NaN	18.7152	20.4816	19.0031	8	8	8	11.3	1081.5	122172
TfIIFbeta	General transcription factor IIF subunit 2	-0.277597	0.385437	19.543	20.4026	20.4687	21.1822	20.8771	20.0418	19.8949	20.0115	3	3	3	8.7	277	32106.8
CG8160	CG8160	-0.277738	0.132521	17.8499	NaN	NaN	NaN	NaN	18.2896	17.5542	19.1521	1	1	1	6.1	212	20774.4
TppII	Tripeptidyl-peptidase 2	-0.27805	0.815238	23.1275	22.3086	22.5195	22.4336	23.1186	23.3581	23.5483	23.822	17	17	17	15.9	1397.5	153823
Ef1beta	Probable elongation factor 1-beta	-0.279757	1.01779	24.2839	23.0205	23.5591	23.039	24.1399	24.4391	24.0397	24.0824	10	10	10	53.6	222	24247.2
Pnn	Pinin, isoform A;Pinin, isoform B	-0.281956	1.05771	24.9248	25.8671	26.401	26.4043	24.9467	24.8667	24.6186	24.6735	19	19	19	50.8	305	36144.2
Upf1	Upf1, isoform B;Regulator of nonsense transcripts 1 homolog	-0.28362	0.402128	19.093	20.2087	20.0173	19.801	19.3311	20.6224	19.8318	20.0299	4	4	4	6	1180	129913
CG9776	Zinc finger matrin-type protein CG9776	-0.283872	1.28917	25.6006	26.7338	26.8926	27.0441	25.7351	25.8106	25.5493	25.5906	38	38	38	29	972.5	108429
Mhc	Myosin heavy chain, muscle	-0.283998	0.439395	22.9568	20.348	20.6705	20.083	21.7869	21.1874	22.0096	21.0464	171	3	0	64.6	1962	224415
ArfGAP3	ADP-ribosylation factor GTPase activating protein 3, isoform E;ADP-ribosylation factor GTPase activating protein 3, isoform F;ADP-ribosylation factor GTPase activating protein 3, isoform G;ADP-ribosylation factor GTPase activating protein 3, isoform A;ADP-ribosylation factor GTPase activating protein 3, isoform H	-0.284225	0.372887	19.7476	19.4997	18.7934	18.5879	18.8031	19.4597	19.3702	19.1369	3	3	3	11.5	549	58608
Cpr50Cb	Cuticular protein 50Cb	-0.285166	0.233114	20.5846	20.1791	17.2664	NaN	16.9484	NaN	NaN	NaN	2	2	2	13.5	178	18722.6
Cht7	Cht7	-0.286926	0.104637	22.4316	19.2693	18.8547	18.5089	17.5286	18.1082	17.9855	NaN	3	3	3	4.3	1013	113285
CG11266	CG11266, isoform A	-0.287465	0.644342	22.0237	22.9939	23.1549	23.1857	21.6315	22.1359	21.5648	22.26	7	7	7	15.8	594	66481.9
Cpr49Ac	Cuticular protein 49Ac, isoform C;Cuticular protein 49Ac, isoform A	-0.288303	0.312295	27.1789	25.4451	24.7043	24.4707	25.5103	24.6457	24.1998	24.1359	16	16	16	53.4	309	35444.2
CG3732	Zinc finger Ran-binding domain-containing protein 2	-0.288443	0.46931	22.9017	24.4665	24.3828	24.9891	23.2753	23.2147	23.9658	22.7883	7	7	7	19.5	282	31033.6
Usp7	Ubiquitin-specific protease 7, isoform C;Ubiquitin carboxyl-terminal hydrolase 7	-0.291643	0.462545	18.0832	17.3181	17.8921	17.8239	17.3137	17.592	17.503	18.4305	1	1	1	1.2	1127	130247
RpLP0	Ribosomal protein LP0, isoform B;60S acidic ribosomal protein P0	-0.29192	1.23241	24.5553	24.6498	24.4568	24.4122	24.4865	24.3215	24.783	24.3943	10	10	10	41.6	317	34202.4
CG16941	CG16941	-0.292257	2.16849	24.6194	25.6366	25.5026	25.8392	24.65	24.7039	24.6633	24.552	30	30	30	40.3	784	88076
pyd	Polychaetoid, isoform A;Polychaetoid, isoform C;Polychaetoid, isoform G;Polychaetoid, isoform B;Polychaetoid, isoform I;Polychaetoid, isoform J;LP05923p	-0.292953	0.957686	20.4837	19.8143	21.0035	19.996	20.1996	19.9973	19.5537	19.801	8	8	8	5.4	1371	148815
cg	Combgap, isoform F;Combgap, isoform B;Combgap, isoform I;Combgap, isoform G;Combgap, isoform J;Combgap, isoform C;Comb gap	-0.293843	0.705659	20.1864	20.3485	20.1406	19.7567	20.0974	20.3871	20.0309	19.4686	2	2	2	3.4	772	83755.4
GlyP	Phosphorylase;Glycogen phosphorylase	-0.294538	0.71985	23.1201	22.7793	22.5886	21.9704	22.9229	23.4906	23.1242	23.0859	19	19	19	26.2	844	96996.7
Obp56a	General odorant-binding protein 56a	-0.298203	0.108168	17.6027	NaN	NaN	NaN	20.0258	16.9815	NaN	NaN	1	1	1	7.2	139	15402.6
CG6178	CG6178	-0.298617	0.572196	NaN	19.3484	18.9222	18.3997	18.3246	19.33	18.6818	19.1332	3	3	3	6.1	544	59938.8
CG6746	CG6746	-0.298725	0.504582	17.6793	NaN	18.3159	18.3175	18.2892	17.425	17.9538	18.097	1	1	1	4.9	245	27542.5
Cpr97Ea	Cuticular protein 97Ea	-0.299522	0.2513	23.5599	23.0065	21.8657	21.2316	22.3387	20.4236	20.6724	20.3231	5	5	5	27	366	40039.7
Taf1	FI22504p1;Transcription initiation factor TFIID subunit 1	-0.30084	1.84025	26.8671	28.1009	28.3186	28.4944	27.9334	27.8741	27.8777	27.9587	85	85	84	44.7	2097	235769
Prp31	LD41209p	-0.300892	0.920535	23.1819	23.3006	23.8449	24.4411	23.5695	23.2846	23.541	23.4301	18	18	18	41.3	501	55544.4
CG7911	CG7911	-0.30151	0.284731	19.1586	19.8292	20.8904	20.595	20.9737	20.5656	20.5179	19.5041	4	4	4	41	156	17369.3
Pdi	Protein disulfide isomerase, isoform E;Protein disulfide-isomerase	-0.301559	0.862206	28.1049	27.3127	27.242	26.8317	27.7103	28.0941	27.9867	27.6129	40	40	40	82.7	496	55781.2
Surf4	Surfeit locus protein 4 homolog	-0.301876	0.212526	19.4797	19.9442	20.8785	19.1163	21.6777	23.92	21.9771	21.5309	3	3	3	7.4	270	30545.6
MED31	Mediator of RNA polymerase II transcription subunit 31	-0.302022	0.204449	NaN	NaN	NaN	NaN	NaN	NaN	NaN	17.4099	1	1	1	4.9	204	23530.5
Mkk4	MAP kinase kinase 4, isoform A	-0.302193	0.634702	19.6485	20.1897	20.7868	20.178	20.6413	20.8062	20.0044	20.7062	4	4	4	9.7	424	47533.8
mRpS5	Mitochondrial ribosomal protein S5, isoform A	-0.302615	0.0911727	NaN	NaN	NaN	NaN	NaN	NaN	NaN	18.6528	2	2	2	7.1	407	45985.1
Lam	Lamin, isoform B;Lamin Dm0	-0.307115	1.66375	26.6189	25.7781	25.4668	25.1864	25.2762	24.9613	25.1339	25.0121	36	36	36	62.2	622	71300.2
eIF-1A	Eukaryotic initiation factor 1A, isoform A	-0.308481	0.104625	17.1106	NaN	18.2304	18.1911	17.3274	17.0294	NaN	NaN	2	2	2	17.6	148	17096.2
Stam	Jak pathway signal transduction adaptor molecule	-0.313645	0.489542	NaN	19.1294	19.3029	19.3909	19.8361	19.8689	19.3354	19.2883	2	2	2	4.8	689	74634.1
tnc	Tenectin	-0.315053	0.148293	28.1833	25.5352	24.9487	27.0443	26.8103	23.7354	25.2852	23.5312	13	13	13	6.1	2788	296405
CG8031	CG8031	-0.317935	0.582446	21.4741	21.1679	21.2406	21.2087	21.4941	21.5959	21.9983	21.5123	6	6	6	25.1	295	33234.8
MSBP	LD12946p	-0.318843	0.705986	20.3229	20.0228	19.8004	20.1805	20.8196	20.3952	20.4732	20.7649	5	5	5	30.2	248	27920.8
shep	Protein alan shepard	-0.319907	0.478396	20.9953	20.5275	21.2087	19.8337	21.0571	21.4322	21.5768	21.8344	3	3	3	11.6	439	47143.2
eIF4G	Eukaryotic translation initiation factor 4G, isoform A;Eukaryotic translation initiation factor 4G, isoform B	-0.321615	1.36975	25.7428	25.4472	25.4459	25.5173	25.9566	25.8809	25.7085	25.8085	36	36	36	29.2	1792.5	197532
CG3397	CG3397	-0.321792	0.318385	18.4879	NaN	NaN	18.1603	19.2001	20.7907	20.7802	19.6004	5	5	5	17.3	342	38085.6
CG8034	CG8034, isoform B;CG8034, isoform A	-0.330218	0.197491	NaN	NaN	NaN	NaN	NaN	NaN	NaN	18.5131	1	1	1	4.6	614.5	66923.2
Paf-AHalpha	Platelet-activating factor acetylhydrolase IB subunit beta homolog	-0.331183	0.170662	19.7466	NaN	18.9841	19.1914	19.7264	19.8161	19.4678	NaN	2	2	2	9.8	225	25460.9
vig2;fdy	SD06613p;Vig2, isoform B;Flagrante delicto Y	-0.33119	0.832207	23.6038	23.0757	23.3134	23.1815	23.2085	22.9411	23.0679	22.7644	12	12	12	28.2	412	45219.3
RpL9	Ribosomal protein L9, isoform C;60S ribosomal protein L9	-0.333357	0.764376	25.4434	26.5196	26.4993	26.5507	26.2408	26.4948	26.6707	26.577	12	12	12	70.5	190	21391.9
Pcp	Pupal cuticle protein	-0.333587	0.261856	25.218	23.3643	23.2704	22.256	23.6034	23.1501	24.0245	22.8113	5	5	5	22.8	184	20633
poe	Purity of essence, isoform B;Protein purity of essence;essence	-0.334455	1.17931	21.9785	22.8189	22.7338	22.661	23.1962	22.7065	23.258	23.1598	25	25	25	6	5322	590702
CG8680	CG8680, isoform A	-0.334917	0.562762	20.2188	20.3608	19.9261	19.9158	20.8147	20.1945	21.2324	20.2441	3	3	3	30.2	126	14357.4
Clect27	C-type lectin 27kD, isoform A	-0.335295	0.333415	23.0575	21.462	20.9717	20.279	21.4223	20.858	19.9349	20.4637	8	8	8	42	231	26347.1
CG15778;CG15778-RA	CG42449, isoform B;CG42449, isoform A	-0.341038	0.108101	25.2669	23.094	20.7609	26.1459	24.1428	19.1376	22.5426	19.9801	5	5	5	10.7	295.5	29880.8
wupA	Troponin I	-0.342047	1.05703	18.7569	19.2403	18.5106	18.1905	18.2648	18.0033	18.1035	17.5943	13	2	0	34.9	269	30081.5
CG3560	Cytochrome b-c1 complex subunit 7	-0.342812	1.20165	22.1727	21.4912	21.111	21.1746	21.3953	21.392	21.2425	21.23	3	3	3	28.8	111	13568.4
eIF3-S6	Eukaryotic translation initiation factor 3 subunit E	-0.343025	1.17375	23.9676	24.0305	24.0121	23.9396	24.3504	24.461	24.4937	23.9089	11	11	11	24.6	435	51162.3
CG8192-RA	CG8192	-0.343164	0.146171	23.119	20.8729	19.4572	21.9345	21.9145	19.3454	18.4262	18.5706	5	5	5	20	431	50575.9
Dhc64C	Dynein heavy chain 64C, isoform E;Dynein heavy chain 64C, isoform G;Dynein heavy chain 64C, isoform D;Dynein heavy chain 64C, isoform F;Dynein heavy chain 64C, isoform H;Dynein heavy chain 64C, isoform I;Dynein heavy chain, cytoplasmic	-0.343323	0.696875	22.8203	22.4058	22.2629	21.9432	22.7194	22.1061	22.6709	22.1732	18	18	18	4.6	4649.5	531253
128up	GTP-binding protein 128up	-0.343715	1.21092	22.1521	21.5146	21.3846	21.1488	22.1635	21.8094	22.3099	22.0295	6	6	6	22	368	41131.7
RpL8	60S ribosomal protein L8	-0.344358	1.24672	28.0803	28.2219	28.3384	28.299	28.3269	28.3204	28.239	27.8473	18	18	18	57	256	27892.5
exu	AT02443p;Maternal protein exuperantia	-0.34528	0.620424	22.2582	22.4537	22.5072	22.6454	23.4726	22.8295	22.2553	22.6952	10	10	10	22.4	532	57974.7
Ald	Fructose-bisphosphate aldolase	-0.345512	1.31925	25.5561	24.3506	24.22	23.6465	24.8457	24.8699	25.2407	24.9082	21	21	21	65.7	363	39561
Not3	LD13864p	-0.345825	0.714341	20.1513	19.3473	19.9389	20.0343	19.8934	20.7261	20.8814	20.463	4	4	4	5	844	92367.7
RpL10Ab	60S ribosomal protein L10a-2	-0.346017	1.61281	27.2159	27.4462	27.41	27.4717	27.4944	27.5228	27.208	27.5736	17	17	17	75.1	217	24273.6
trio	Trio, isoform A;Trio, isoform D;Trio, isoform B	-0.347812	0.462671	18.8475	18.546	19.0051	18.7469	17.9163	18.4396	18.8969	18.5489	4	4	4	2.4	804	87980.1
RpS19a	Ribosomal protein S19a, isoform C;40S ribosomal protein S19a	-0.348628	1.07063	27.3988	26.7773	26.9846	26.8702	26.9408	27.0339	27.3738	26.8186	17	17	17	73.1	156	17291.1
SRPK	SRPK, isoform A;SRPK, isoform C	-0.350067	0.657294	22.1805	22.1181	22.2284	22.7737	22.1201	21.9716	21.8591	21.1923	9	9	9	16.5	685.5	76592.9
Atg3	Autophagy-related protein 3	-0.353777	2.63106	18.7656	18.7055	19.0347	19	18.697	18.6359	18.8802	18.5797	2	2	2	9.4	330	37012.2
bip2	Bip2	-0.357763	1.2199	24.4575	26.0001	26.1157	26.5245	25.4968	25.5788	25.419	25.7956	34	34	34	30.5	1406	154501
His4	Histone H4	-0.359692	1.04085	26.7856	28.0498	28.437	28.4425	27.9707	28.0091	28.3902	28.0512	16	16	16	68.9	103	11381.4
Cyp4g1	Cytochrome P450 4g1	-0.35982	0.463485	19.7315	19.8959	20.2923	20.2418	20.894	21.2696	21.5038	20.3813	4	4	4	8.5	556	62970.8
CG9975-RA	CG9975	-0.35995	0.922139	20.7332	20.0478	20.165	20.2305	19.9631	19.9445	20.456	19.7564	4	4	4	11.9	513	55330
Taf4	TBP-associated factor 4, isoform H;TBP-associated factor 4, isoform E;TBP-associated factor 4, isoform F;TBP-associated factor 4, isoform G;Transcription initiation factor TFIID subunit 4;TBP-associated factor 4, isoform D	-0.360646	1.66355	26.6632	27.5914	27.6062	27.8263	27.0961	27.0831	27.2772	27.0405	36	36	36	33.4	921	99338.1
Edc3	Enhancer of mRNA-decapping protein 3	-0.362859	0.21865	18.2321	17.8632	17.7475	18.0292	17.5099	18.0578	19.1879	NaN	4	4	4	6.9	680	73415.3
CG11089	CG11089	-0.363193	0.815301	24.5624	23.4165	23.2533	22.9842	23.5286	24.2161	24.1821	23.5152	18	18	18	35.4	590	63323.4
Pgk	Phosphoglycerate kinase	-0.366991	0.644884	25.7401	24.2334	24.3498	23.6348	25.101	25.3324	25.5739	24.4409	18	18	18	51.6	415	43861.8
RpL36	Ribosomal protein L36, isoform E;60S ribosomal protein L36	-0.369157	1.02841	25.2815	25.6997	25.6355	25.6175	26.1077	25.6944	25.5873	25.4501	8	8	8	29.6	115	13502
CG4291-RA	CG4291, isoform A	-0.37223	1.36843	22.1873	23.3603	23.5766	23.7525	22.6259	22.9934	22.5648	22.7323	11	11	11	43.5	338	38787.3
CG2444	CG2444, isoform A	-0.375576	0.117135	22.9078	20.7925	20.4251	20.4359	22.1367	21.3806	NaN	20.7693	3	3	3	27.2	114	12122.1
Prm	FI03688p;Paramyosin, long form	-0.375902	0.464773	28.3796	26.1265	25.8883	25.5725	27.5424	26.8645	27.2951	26.3455	55	55	34	58.9	879	102338
ball	Ballchen, isoform B;Nucleosomal histone kinase 1	-0.378875	0.677173	18.1322	18.1277	18.1776	17.9467	17.6448	17.7629	17.6751	17.7876	2	2	2	4.3	599	65993.7
Mad1	FI09619p	-0.380015	0.530447	20.8554	21.7225	21.4257	21.1115	20.3356	20.5014	20.9437	19.9266	6	6	6	11.9	730	85018.4
chic	Profilin	-0.38144	0.597445	26.1516	26.0686	25.5187	25.3975	25.1931	26.1476	26.1009	25.8232	5	5	5	73	126	13723.5
osa	Osa, isoform C;Osa, isoform D;Trithorax group protein osa	-0.38152	0.826586	NaN	20.8994	20.8235	21.382	20.9282	21.0284	20.818	20.3668	2	2	2	1.2	2716	284064
Pdcd4	LD21074p	-0.38154	0.514091	22.3752	21.3533	21.5729	21.7422	22.3997	22.1319	22.4991	21.227	8	8	8	18.9	509	56354.9
CG33123	CG33123, isoform A	-0.381998	0.176998	18.5239	17.5883	NaN	18.127	18.5564	18.4467	19.2636	NaN	2	2	2	2	1182	134873
LKR	Lysine ketoglutarate reductase, isoform A	-0.382288	0.4129	24.6059	21.2377	19.6701	20.5693	20.9243	21.9688	21.1455	20.2011	6	6	6	8	928	103125
mub	Mushroom-body expressed, isoform G;LD32520p;Mushroom-body expressed, isoform L;Mushroom-body expressed, isoform A;Mushroom-body expressed, isoform H;Mushroom-body expressed, isoform D;Mushroom-body expressed, isoform I;IP17311p;Mushroom-body expressed, isoform K	-0.384293	1.42139	24.9803	24.9381	24.4706	24.493	24.2569	24.7917	24.536	24.3111	6	6	6	29	433	45441.9
Tudor-SN	LD20211p	-0.384528	1.24001	25.0496	24.1245	24.5339	23.8164	24.6342	25.1893	25.1543	24.8879	32	32	32	43.6	926	103100
Wdr82	WD repeat-containing protein 82	-0.38635	0.732983	21.8274	22.7215	22.437	22.5732	21.2004	21.2216	21.2921	21.203	7	7	7	28.1	317	35355.1
CG7172	CG7172	-0.387099	0.925184	NaN	NaN	16.8769	17.0177	17.1952	16.6531	16.6806	17.1359	2	2	2	8.6	232	26780.8
Fbp1	Fat-body protein 1;Fat body protein 1, isoform D	-0.388289	1.23955	32.3205	31.5142	31.656	30.9224	31.5017	31.6594	31.544	31.3989	90	90	2	71	1028	119578
rl	Mitogen-activated protein kinase ERK-A;Rolled, isoform I	-0.392563	1.71735	19.2243	19.9791	19.3325	19.3221	19.8783	20.155	20.3273	20.094	3	3	3	7.4	353.5	40790.9
NnaD	Drosophila Nna1 ortholog, isoform F;Drosophila Nna1 ortholog, isoform E;Drosophila Nna1 ortholog, isoform J;Drosophila Nna1 ortholog, isoform I;Drosophila Nna1 ortholog, isoform H;Cytosolic carboxypeptidase NnaD	-0.392774	0.17388	NaN	18.5846	18.2327	18.4429	NaN	NaN	18.9773	NaN	4	4	4	5	1145	127991
Amun	Amun, isoform A	-0.393391	0.258397	NaN	19.4395	19.1916	20.3053	20.3063	18.686	19.3036	NaN	3	3	3	7.5	550	58422.8
Hrb27C	Heterogeneous nuclear ribonucleoprotein at 27C, isoform D;Heterogeneous nuclear ribonucleoprotein 27C	-0.396003	1.85726	27.349	27.0546	27.0144	27.316	26.5637	26.7518	26.7666	27.0035	14	14	14	52.5	421	44769.8
gw	Protein Gawky	-0.396963	0.564457	20.2588	21.2311	21.0641	21.8538	20.8918	21.3181	21.3207	20.5019	7	7	7	9.3	1382	142749
Crc	Calreticulin	-0.39927	0.646052	25.1331	24.1135	24.1001	23.2933	23.9876	24.5906	24.329	24.0731	9	9	9	30.8	406	46808.5
Abp1	Drebrin-like protein	-0.400166	0.245689	NaN	16.3078	16.2141	NaN	17.4965	16.9668	NaN	NaN	1	1	1	2.3	531	58729.3
CG17337	CG17337	-0.400732	0.303726	20.8464	19.9438	19.441	18.7046	19.2795	21.4953	19.4123	19.5942	4	4	4	10.9	478	53163.7
Cypl	Peptidyl-prolyl cis-trans isomerase	-0.400848	0.9791	22.7013	24.059	24.2819	24.4165	22.9229	23.3627	23.0196	23.0517	10	10	10	55.1	176	19525.1
nocte	No circadian temperature entrainment, isoform D;LP18708p	-0.402267	0.899693	21.8626	21.6021	21.5601	21.6072	21.7443	21.7813	21.4923	21.1044	11	11	11	6.7	2307	235318
His3	Histone H3	-0.40329	0.8201	26.1053	27.7555	27.8338	27.6224	26.6381	27.204	27.723	27.0766	10	10	2	65.4	136	15388
Mlc1	Myosin light chain alkali	-0.403878	1.5249	27.9569	26.5186	26.6334	26.558	26.9907	27.0393	27.2712	27.4943	8	8	8	47.1	155	17528.4
CG9267-RA	CG9267	-0.404036	0.152241	18.1063	18.7554	18.8466	19.0252	19.3664	19.389	NaN	19.9731	2	2	2	8.9	371	43682.4
TRAM	Translocating chain-associated membrane protein	-0.404268	0.845149	20.3091	19.8269	19.7775	19.4305	20.7711	20.3742	20.6402	20.2149	1	1	1	4.3	368	41780.2
mtd	GH11677p;L(3)82Fd, isoform O;L(3)82Fd, isoform G;L(3)82Fd, isoform K;L(3)82Fd, isoform S;L(3)82Fd, isoform U;L(3)82Fd, isoform B;L(3)82Fd, isoform P;L(3)82Fd, isoform M	-0.405347	0.343074	NaN	17.8699	17.5288	18.0488	18.1505	18.7783	18.7002	18.2098	2	2	2	3.7	1055	114732
RpS13	Ribosomal protein S13, isoform C;40S ribosomal protein S13	-0.405588	1.61734	26.6516	26.863	26.8152	26.8184	26.7178	26.5727	26.9183	26.5875	11	11	11	50.3	151	17178.3
Tim17b	Tim17b, isoform A	-0.405755	0.831678	18.0364	17.4	17.802	17.1006	18.6217	18.968	19.2582	18.3326	1	1	1	5.8	173	18219.9
CG3621-RA	CG3621, isoform A	-0.406985	1.29195	19.9818	18.3554	18.4711	19.6379	20.2147	20.395	20.2541	19.6874	3	3	3	35	103	11546.1
cindr	CG31012, isoform C;CG31012, isoform D;BcDNA.GH03163;CG31012, isoform A	-0.408533	1.09606	22.2244	21.9795	21.5953	22.3229	21.7828	21.7313	21.6836	21.3319	10	10	10	16.7	590	62201.9
CG5168	CG5168, isoform A	-0.412075	0.874921	21.1166	20.6402	20.5361	20.2342	21.5919	21.6727	21.5107	20.7801	2	2	2	4.2	408	46190.4
RpL12	RE28824p	-0.4183	1.34678	25.6809	25.6028	25.7819	25.4632	25.5522	25.6164	25.6823	25.7603	7	7	7	50.3	165	17673.6
Cpr97Eb	Cuticular protein 97Eb	-0.418455	0.2916	23.7134	22.837	21.368	21.7522	22.3018	20.563	19.9697	20.1964	6	6	6	31.9	235	26751.5
CG9754	CG9754	-0.418478	0.412841	19.906	20.2988	20.7442	20.0825	19.4699	19.748	19.3637	18.4046	7	7	6	17.6	541	61147.8
bai	Transmembrane emp24 domain-containing protein bai	-0.418488	0.345077	19.4883	19.6773	18.698	18.6833	21.5373	21.0021	22.423	20.3055	5	5	5	19.9	206	23691.7
Hexo1	Beta-hexosaminidase	-0.420176	0.29002	20.5386	NaN	NaN	NaN	16.5099	15.9362	16.5373	NaN	1	1	1	2.5	614	69783.5
Syt1	Synaptotagmin 1, isoform I;Synaptotagmin 1, isoform H;Synaptotagmin 1	-0.420347	0.351733	NaN	NaN	18.4147	18.2445	NaN	18.8016	19.2255	NaN	1	1	1	2.1	472	53032.8
Cul4	Cullin-4, isoform A	-0.420418	0.194776	19.1378	19.5636	19.5825	19.1131	NaN	20.256	19.5099	18.9654	3	3	3	5.2	821	94407.8
Gs1	Glutamine synthetase;Glutamine synthetase 1, mitochondrial	-0.421368	1.19078	25.5163	25.1286	25.0706	24.7493	24.75	24.9788	24.7701	24.533	9	9	9	37.1	399	44396
CG10907	CG10907	-0.425959	0.148237	20.2682	21.1277	20.3093	22.0382	19.0574	19.3329	19.297	19.5797	3	3	3	9.8	502	56610.1
CG2767	CG2767, isoform A;CG2767, isoform B	-0.428067	0.308537	23.9885	25.629	23.302	25.2814	24.6243	25.6949	25.4439	23.5907	11	11	11	38.3	339	37983.4
cora	Protein 4.1 homolog	-0.43224	2.41779	23.9823	23.6964	23.5677	23.5628	23.734	23.7194	23.8165	23.7629	26	26	26	24.5	889	97998.7
Klc	Kinesin light chain, isoform C;Kinesin light chain, isoform B;Kinesin light chain	-0.43288	1.16258	21.712	21.6366	21.4543	21.6532	21.9339	21.3399	21.7635	22.0938	7	7	7	16.4	508	58044.3
UGP	FI18837p1;LD13601p;LD36265p;RE14081p	-0.43346	0.66044	22.7974	21.947	21.7346	21.3945	21.4958	22.6171	22.5511	21.8578	7	7	7	12.9	515.5	58288.5
CG7546	CG7546, isoform B;CG7546, isoform F;CG7546, isoform G;CG7546, isoform C;CG7546, isoform E;CG7546, isoform A;CG7546, isoform H;CG7546, isoform D	-0.435013	0.947441	18.1415	17.9164	18.1632	18.3371	17.9893	18.0793	NaN	18.4236	2	2	2	3.4	1248.5	133137
Ars2	Serrate RNA effector molecule homolog	-0.435548	3.16693	25.697	26.6886	26.5851	26.8575	25.9706	25.8763	26.0925	25.8001	48	48	48	49.7	943	107222
RpL6	Ribosomal protein L6, isoform A;RE08669p	-0.436295	1.61036	26.5054	27.1273	27.1807	27.1227	27.1326	27.2309	27.0781	26.9118	17	17	17	43.6	252.5	28717.1
zip	Myosin heavy chain, non-muscle	-0.436515	0.685196	22.3776	22.5026	22.3241	21.1935	21.8053	21.4053	22.5056	21.3135	109	2	2	52.8	2014.5	231788
EG:67A9.2	CG16903	-0.439238	0.81336	21.3559	21.819	22.5426	22.978	21.842	21.2066	21.6126	22.3351	5	5	5	13.9	560	62323.5
Gapdh2	Glyceraldehyde 3 phosphate dehydrogenase 2, isoform C;Glyceraldehyde-3-phosphate dehydrogenase 2	-0.43984	3.06372	27.7913	27.5188	27.3233	27.0494	27.6273	27.8735	27.8339	27.7812	17	17	5	65.4	332	35369.5
Taf11	Transcription initiation factor TFIID subunit 11	-0.439873	0.708777	22.8245	24.5387	24.829	25.2069	24.4687	23.6714	23.8026	24.6985	9	9	9	49	196	22091.5
RpL32	60S ribosomal protein L32	-0.440425	1.46286	25.5112	25.6777	25.9524	25.886	25.8747	26.0234	25.6487	25.375	14	14	14	64.9	134	16019.8
fs(1)h	Female sterile (1) homeotic, isoform G;Homeotic protein female sterile;Female sterile (1) homeotic, isoform H;Female sterile (1) homeotic, isoform F;Female sterile (1) homeotic, isoform I	-0.441242	1.78539	25.5137	26.4743	26.6803	27.0039	25.8884	25.7772	25.7521	25.4325	36	36	36	25.1	1112.5	110883
RpL35A	RE17737p	-0.441973	0.723243	26.25	25.9705	25.9352	26.0058	26.2704	26.0836	26.4858	25.8183	14	14	14	50.3	157	17655.7
U2af50	U2 small nuclear riboprotein auxiliary factor 50, isoform C;U2 small nuclear riboprotein auxiliary factor 50, isoform D;U2 small nuclear riboprotein auxiliary factor 50, isoform B;Splicing factor U2AF 50 kDa subunit	-0.443125	1.20867	22.1151	22.4585	23.4067	23.4684	22.3778	22.8238	22.0979	22.6847	4	4	4	20.8	416	46655
RpS28b	Ribosomal protein S28b, isoform B;40S ribosomal protein S28	-0.443307	1.36636	25.1056	23.8522	23.6659	23.5204	24.1201	23.9838	24.2039	23.9314	8	8	8	78.5	65	7476.71
Bx42	Bx42, isoform B;Puff-specific protein Bx42	-0.445121	1.72706	27.3428	28.5254	28.5298	28.6353	27.5749	27.2687	27.1511	27.2818	33	33	33	65.6	547	61156.8
EloC	Elongin C, isoform A	-0.445367	0.568996	21.8259	21.4991	21.1856	20.9519	21.6995	21.8606	21.7144	21.3933	4	4	4	44.4	117	13119
CG9684	CG9684	-0.446745	2.37914	19.4843	20.3678	20.019	20.5172	20.1026	20.1683	19.9143	19.8016	5	5	5	9.2	642	71907.7
RpL7-like	IP16805p	-0.447839	0.150734	20.7983	20.8715	20.8189	20.2173	20.2823	20.5106	20.513	NaN	3	3	3	13.2	257	29160.8
Dmn	Probable dynactin subunit 2	-0.453585	0.619585	19.249	19.3732	19.1941	19.2146	19.7164	20.1689	19.614	19.2699	3	3	3	10.8	380	41998.3
SsRbeta	Translocon-associated protein subunit beta	-0.454193	1.69995	23.5278	23.3012	23.2489	23.3901	24.4205	24.3539	24.0984	24.6592	3	3	3	35.3	190	21206.4
Ran;ran	Ran, isoform B;GTP-binding nuclear protein Ran	-0.454413	2.43545	25.7614	25.317	25.2374	25.2943	25.339	25.483	25.728	25.3977	13	13	13	68.5	216	24708.4
CG10399	CG10399, isoform A	-0.454809	0.177488	NaN	NaN	NaN	19.1385	NaN	NaN	NaN	NaN	1	1	1	4	323	34173.4
Taf12	Transcription initiation factor TFIID subunit 12	-0.456759	1.57996	23.366	24.6608	24.8488	24.7323	24.4053	23.928	24.4741	24.1076	8	8	8	76.9	178	19576.3
Fdh	Alcohol dehydrogenase class-3	-0.458358	0.591652	19.9637	18.8167	18.5622	18.5563	19.5095	20.1749	20.2261	19.3762	4	4	4	12.4	379	40389.5
ash2	Absent, small, or homeotic discs 2, isoform D;Set1/Ash2 histone methyltransferase complex subunit ASH2	-0.45857	0.112434	NaN	20.721	21.021	20.179	NaN	NaN	NaN	19.9244	3	3	3	7	556	63229.2
EloB	Elongin B	-0.461481	0.503682	18.6389	19.5237	19.9732	19.7849	19.4522	18.8163	19.533	20.6922	2	2	2	20.3	118	13257.9
TER94	Transitional endoplasmic reticulum ATPase TER94	-0.466473	1.6098	25.7544	25.6781	25.5452	25.7737	25.8164	26.0902	26.427	25.7781	35	35	35	48.8	801	88859.4
BEAF-32	Boundary element associated factor	-0.46664	1.54316	21.3402	20.5968	21.9916	22.2104	20.8099	20.5438	20.1879	20.7892	5	5	5	16.7	282.5	31721.2
Bacc	Bacchus, isoform A	-0.467322	1.51539	23.0569	23.5068	23.4303	23.9806	23.9757	24.3641	23.9056	23.7006	6	6	6	48.7	152	15459.9
CG9293-RB;CG9293	CG9293, isoform B;CG9293, isoform A	-0.467515	0.210684	19.2483	NaN	20.1572	19.9192	19.6129	NaN	19.2881	19.9525	2	2	2	11.1	278	31302.6
CG7564	CG7564, isoform A	-0.468169	0.131418	18.15	18.2869	NaN	NaN	NaN	19.097	NaN	NaN	3	3	3	9	420	48415.6
RpL18A	60S ribosomal protein L18a	-0.469782	1.57989	26.4742	27.0759	26.9686	27.2254	27.1619	27.1195	26.9603	27.0217	17	17	17	63.3	177	21029.6
CG13041;CG13060	CG13041;CG13060	-0.470623	0.353994	26.1849	25.9384	25.3368	24.87	24.4614	23.2726	22.1677	22.3065	3	3	3	39.5	127.5	13173.9
Pkn	Protein kinase related to protein kinase N, isoform F;Protein kinase related to protein kinase N, isoform H;Serine/threonine-protein kinase N;FI17849p1;Protein kinase related to protein kinase N, isoform D;Protein kinase related to protein kinase N, isoform G	-0.4718	0.219744	NaN	19.5731	18.9283	18.3706	17.8839	NaN	NaN	NaN	4	4	4	4.4	1284	142233
ens	Ensconsin, isoform C;Ensconsin, isoform H;Ensconsin, isoform B;Ensconsin, isoform A;Ensconsin, isoform E;Ensconsin, isoform I;Ensconsin, isoform J;Ensconsin, isoform D;Ensconsin, isoform K;Ensconsin, isoform G;Ensconsin, isoform F	-0.472286	0.186386	NaN	21.4017	23.3141	21.2235	NaN	NaN	NaN	NaN	2	2	2	4.1	933	103187
RpL27	60S ribosomal protein L27	-0.472485	1.1513	26.8322	27.2207	27.08	27.1109	27.2118	26.8447	26.9665	26.4899	9	9	9	58.5	135	15902.9
RpII215	DNA-directed RNA polymerase II subunit RPB1	-0.473405	2.01001	24.7125	25.466	25.1884	25.3668	24.3029	24.6845	24.4643	24.365	39	39	39	23.3	1887	209168
Tango4	LD24662p	-0.473907	2.40161	25.6586	26.871	26.9913	27.1461	25.7284	25.7912	25.859	25.7173	26	26	25	62.9	482	52696.9
Tal	Probable transaldolase	-0.47702	0.525703	19.0386	NaN	19.0179	18.8227	19.263	20.0051	19.9998	19.994	2	2	2	6.3	331	36733.6
Fmr1	Fragile X mental retardation syndrome-related protein 1;Fmr1, isoform F	-0.477532	1.63234	24.6812	23.8209	23.971	23.6329	23.9372	24.2127	23.6722	23.5939	17	17	17	30.5	646	71993.4
Cyp4d1	Cytochrome P450 4d1	-0.479166	0.416233	NaN	NaN	NaN	NaN	NaN	NaN	NaN	NaN	3	3	1	6.2	503	57413.7
rush	EG:80H7.5 protein	-0.479426	0.872763	20.5324	20.1347	20.2979	20.9234	20.9924	20.9285	21.18	20.4506	3	3	3	10.4	316	34219.4
RanBP3	CG10225	-0.47958	0.550074	NaN	18.7355	19.2013	19.8921	19.1689	19.0484	19.8886	18.5444	1	1	1	4.5	449	47502.5
colt	Congested-like trachea protein	-0.482833	0.92277	19.6975	19.7314	19.8201	19.8952	20.6993	20.4567	21.2321	21.4382	4	4	4	16	306	32952.4
Top1	Topoisomerase 1, isoform D;RE58921p;DNA topoisomerase 1;Topoisomerase 1, isoform B;Topoisomerase 1, isoform E	-0.483325	1.5158	25.9658	26.7161	26.9855	27.0483	25.9611	25.7627	26.4859	26.2064	48	48	48	40	970	111575
RpL7A	Ribosomal protein L7A, isoform E;60S ribosomal protein L7a	-0.484042	1.51024	27.5067	27.6663	27.5143	27.6909	27.7714	27.5868	27.4785	27.1916	22	22	22	57.9	271	30731.8
stai	RH02809p;LD04103p;Stathmin, isoform B;Stathmin, isoform D	-0.484192	1.23631	23.3374	22.5826	22.4825	22.4177	22.8419	22.5886	22.0952	22.9172	9	9	9	41.2	279.5	32147
Deaf1	Deformed epidermal autoregulatory factor-1, isoform B;Deformed epidermal autoregulatory factor-1, isoform D;Deformed epidermal autoregulatory factor 1;Deformed epidermal autoregulatory factor-1, isoform E;Deformed epidermal autoregulatory factor-1, isoform C	-0.48489	0.813142	NaN	18.6519	18.6162	18.6395	18.441	NaN	NaN	18.0963	2	2	2	4.7	573	61324.4
CG6126	CG6126	-0.485175	0.468942	NaN	17.8227	18.0334	NaN	18.3952	18.6179	18.2411	19.049	1	1	1	1.8	555	60872.1
Rbp1-like	RE47308p;Rbp1-like, isoform B	-0.487412	0.636621	23.632	23.1817	22.4659	22.7664	21.5499	22.9389	22.2515	21.8302	5	5	2	22.2	202.5	21333.5
Hmu	FI18644p1	-0.48777	0.802344	20.5699	19.326	20.0658	19.2725	19.9752	19.9134	20.5747	19.4064	3	3	3	6.4	579	63415.7
CG17168	CG17168	-0.488764	1.52083	23.3852	24.125	24.1569	24.6977	23.4764	23.4367	23.3523	23.3926	12	12	12	24.2	421	49756.7
CG1236	CG1236	-0.489388	1.6288	23.2338	22.6546	22.7112	21.792	22.6554	23.3255	22.9641	23.2003	8	8	8	23.1	347	38374.6
CG32521;CG32521-RA	CG32521, isoform G;CG32521, isoform I;CG32521, isoform A	-0.491228	1.04226	19.8776	20.1591	20.4299	20.0166	20.2183	20.3337	19.5864	19.6777	2	2	2	13.9	323	29875.9
Art1	Arginine methyltransferase 1	-0.49173	0.619739	19.3691	19.2911	20.1346	19.6382	20.6068	20.239	20.2378	20.0562	2	2	2	10.1	376	42805.5
CG5703	CG5703, isoform A	-0.49209	0.261578	19.0496	18.5841	17.7521	17.6325	NaN	NaN	NaN	NaN	1	1	1	8.7	242	26781.7
AP-2alpha	AP-2 complex subunit alpha	-0.492615	1.24349	21.171	20.9375	21.2225	21.5126	21.0445	21.3199	21.9154	21.4238	4	4	4	5.6	946	106278
CG17233	CG17233, isoform D;CG17233, isoform H;CG17233, isoform E;CG17233, isoform A;CG17233, isoform G;CG17233, isoform F;CG17233, isoform C	-0.492769	0.327497	17.7238	18.1555	17.944	NaN	17.6958	NaN	NaN	NaN	1	1	1	3.4	1173	130388
RpL13A	60S ribosomal protein L13a	-0.492912	1.30556	26.0184	26.5221	26.6983	26.6749	26.9171	26.4961	26.3002	26.3853	16	16	16	48.8	205	23647
GstS1	Glutathione S transferase S1, isoform C;Glutathione S-transferase S1	-0.493603	0.564793	20.1444	19.8522	19.6794	19.2149	20.3845	20.4095	21.3408	20.9113	4	4	4	18.5	249	27613.5
yps	Ypsilon schachtel, isoform B;LD37574p	-0.49683	0.875757	21.7435	20.7678	20.5588	20.5677	19.3363	19.4593	19.8217	19.7178	4	4	4	12.4	346	37579.5
MED6	Mediator of RNA polymerase II transcription subunit 6	-0.499536	0.9949	19.7514	19.8007	20.2851	20.4786	19.8342	20.4388	20.3599	19.7164	2	2	2	12.4	249	28374.2
BCL7-like	BCL7-like	-0.499645	0.83125	20.3707	21.6891	21.9801	21.5774	21.6528	21.8203	21.6991	21.7146	5	5	5	20.8	154	16648.6
Osi7	FI03362p	-0.500398	1.14687	17.6108	17.5749	17.4699	17.478	17.5721	17.6459	17.3783	17.5809	1	1	1	5.2	288	30036.1
Irp-1B	Iron regulatory protein 1B	-0.500982	1.49207	23.7935	23.3207	23.0535	22.2008	23.2331	23.5035	23.6048	23.3331	18	18	18	24.6	899	98578.4
AP-2mu	AP-50, isoform A	-0.50317	1.20078	22.3746	21.2332	21.5683	21.5947	21.6756	21.195	21.1826	21.9048	5	5	5	11	437	49856
hang	Hangover, isoform C;Zinc finger protein hangover	-0.504328	0.78244	19.8142	20.5006	19.9978	20.7194	19.1848	19.2815	19.3369	19.4782	6	6	6	3.9	1913	209717
ssp3	Short spindle 3, isoform B;LD01527p	-0.505214	0.315144	NaN	NaN	19.5752	NaN	19.2188	19.82	19.3194	NaN	4	4	4	2.6	1731	192912
CG7065	Uncharacterized protein CG7065	-0.506762	1.12603	21.2035	22.1406	21.5392	22.0385	20.73	20.518	20.205	19.8356	7	7	7	9.1	1231	136767
mof	Males-absent on the first protein	-0.509255	1.88986	NaN	19.8417	19.8369	20.127	19.4896	19.6436	19.4312	19.8835	2	2	2	4.1	827	92656.8
CG3961-RD;CG3961;CG3961-RA	CG3961, isoform D;CG3961, isoform E;CG3961, isoform A	-0.509383	0.764461	23.1432	22.2739	22.4571	22.5948	22.1117	22.8168	21.9568	22.9101	7	7	7	13.1	666	74618.1
CG12203	CG12203	-0.510737	1.30191	22.6641	22.934	22.211	21.6609	22.1199	22.4477	22.2538	22.3065	2	2	2	18	183	20681.4
CG33299	CG33299, isoform C;CG33299, isoform B	-0.512443	0.353408	20.0513	18.1848	NaN	NaN	18.0859	16.5297	16.7327	NaN	1	1	1	5.2	182.5	20195.9
Kr-h2	Kruppel homolog 2, isoform C;Krueppel homolog 2	-0.512543	1.71028	20.9014	21.4085	21.1559	21.8976	21.5485	21.583	21.6308	22.1576	7	7	7	24.6	276	31215.3
Nup358	Nup358	-0.513252	2.89176	25.203	24.551	24.4586	24.3943	24.1366	24.3288	23.9963	23.9721	31	31	31	16.8	2695	296385
RpL21	RE62581p	-0.515907	2.37825	28.0493	28.5094	28.4126	28.6221	28.0982	28.2186	27.9666	27.9847	15	15	15	58.5	159	18475.7
RpL37A	Ribosomal protein L37A, isoform C;60S ribosomal protein L37a	-0.51644	0.574961	22.1349	23.1509	22.4855	22.9585	21.6749	22.6184	23.3322	22.1947	5	5	5	48.9	92	10311.2
825-Oak;CG32213	825-Oak;CG32213	-0.5183	0.225607	26.7074	21.7073	22.0072	20.8984	22.8072	21.8721	24.3386	22.1034	3	3	3	36.4	129	12609
CG17734	CG17734, isoform B;CG17734, isoform A	-0.519187	0.163598	17.809	17.6606	18.0966	18.2681	19.9572	19.4486	19.6908	NaN	1	1	1	14.7	98	10608.3
CG3603	CG3603, isoform A	-0.519942	0.842042	17.4102	17.6707	18.0061	17.5801	17.7216	17.4084	18.0207	18.4339	1	1	1	5.2	249	26213.1
CG11985	Probable splicing factor 3B subunit 5	-0.520878	2.9465	20.7111	21.6734	21.6183	22.0137	20.5105	20.3551	20.311	20.3078	3	3	3	41.2	85	9971.18
CG18292-RA;CG18292	CG18292, isoform A;CG18292, isoform B	-0.521276	0.676849	NaN	17.8945	NaN	17.7105	17.3098	17.555	17.458	NaN	2	2	2	9.3	288	29958
rngo	AT13091p	-0.521601	0.727536	22.0504	21.3725	21.1083	20.8108	22.2959	22.1259	21.4275	21.0556	7	7	7	21.6	458	50537
CG13907	CG13907, isoform A	-0.52222	0.932867	18.9597	19.573	20.0393	19.7834	20.4901	20.4712	19.9246	20.3757	6	6	6	12.3	816	88036.4
snama	Something that sticks like glue	-0.524898	1.80793	25.8022	26.8291	27.2524	27.5476	26.6479	26.5632	26.6162	26.3747	29	29	29	24	1231	139039
CG30185;Gr59f	CG30185	-0.527842	0.521999	20.0066	19.7232	19.2145	19.1491	20.2051	20.7091	18.8368	19.4154	2	2	2	12.3	179	19979.7
hydra	Hydra, isoform B;Hydra, isoform A	-0.528846	0.187351	20.4398	14.7747	NaN	NaN	13.0727	NaN	NaN	NaN	1	1	1	2.3	302	34984.9
CG8368	CG8368, isoform A	-0.530282	2.09897	19.532	19.516	18.7563	18.7581	19.1307	19.0074	18.6874	18.6161	3	3	3	7.5	681	76719.2
Aats-ile	Isoleucyl-tRNA synthetase, isoform A	-0.53203	1.51863	20.6048	20.7165	21.0663	21.0257	21.3405	21.837	21.4188	21.7175	11	11	11	10.9	1229	141099
CG12279	Sulfurtransferase	-0.532127	1.59918	22.6569	23.4768	23.6457	24.0114	22.8573	23.3506	23.2567	22.9478	6	6	6	85.5	110	12060.6
RpL27A	Ribosomal protein L27A, isoform C;60S ribosomal protein L27a	-0.534205	2.54865	26.7264	27.1382	27.2372	27.4962	27.0477	27.1202	27.1319	27.2337	11	11	11	55	149	17022
Atx2	Ataxin-2 homolog	-0.535952	2.16988	22.8477	22.7393	22.6883	23.0873	22.8457	23.0537	22.7964	22.7373	9	9	9	12.7	1023	111409
Adk2	Adenylate kinase	-0.537257	0.723303	18.5654	19.5629	19.5579	19.0789	19.347	19.5965	19.3174	19.233	2	2	2	10.8	240	26542.5
CG32795	CG32795, isoform C;Transmembrane protein 120 homolog	-0.53786	0.936124	17.7373	17.5858	17.4695	17.4288	17.8645	17.4767	17.5344	18.6467	2	2	2	5.7	387	45486.9
ImpL1	Ecdysone-inducible gene L1, isoform C;Ecdysone-inducible gene L1, isoform A;Ecdysone-inducible gene L1, isoform B	-0.538499	1.80241	27.3123	28.1437	28.276	28.4313	26.9144	27.0695	26.5751	26.8992	20	20	20	44.7	341	38307.4
CG4769	CG4769, isoform A	-0.538753	0.610423	19.0249	19.081	18.637	19.6006	20.7844	20.5238	21.1553	19.6384	3	3	3	12.4	307	33764.2
GstE12	CG16936	-0.540998	1.07492	23.1472	22.4153	22.7967	22.9069	22.617	23.118	23.3691	22.4209	6	6	6	31.8	223	25177.1
RpS5a;RpS5b	Ribosomal protein S5a, isoform B;40S ribosomal protein S5a;40S ribosomal protein S5b	-0.541567	1.08947	24.8845	24.5685	24.4517	24.9398	24.576	24.4574	25.2102	24.6317	10	10	10	50	228	25434.3
CG3605	CG3605, isoform A	-0.542043	1.28638	24.5585	24.6876	24.9124	25.2253	24.6071	23.8455	23.662	24.037	27	27	27	45.9	749	84781.1
RpS27A;RpL40;Ubi-p5E;Ubi-p63E	Ubiquitin-40S ribosomal protein S27a;RE10554p;GH17761p;Ubiquitin-63E, isoform C;Ubiquitin-60S ribosomal protein L40;Polyubiquitin	-0.54271	0.874989	23.9949	24.8731	24.8761	24.5723	24.4174	24.5173	24.7094	23.8802	6	6	6	50.6	345	38985
GM130	GM130, isoform B;GM130, isoform A	-0.543644	0.742535	18.9855	18.7973	18.8317	19.0196	19.2057	19.4182	19.3556	19.2056	5	5	5	7.5	775	88871.4
TBCB	CG11242	-0.544538	0.897958	20.2069	19.4305	19.3839	19.2238	20.4464	20.496	20.1926	19.3318	4	4	4	18	244	26974.2
CG3163	CG3163	-0.544567	1.8884	19.0578	19.2884	19.4393	19.4254	19.1466	18.7191	18.8728	18.6657	2	2	2	5.7	368	41522.8
CG14641	CG14641	-0.54489	2.64902	25.1543	26.3254	26.4226	26.8771	25.2911	25.2252	25.2793	25.3942	23	23	23	56.2	418	47167.8
schlank	LD18904p	-0.546708	1.12227	19.5837	19.8578	19.985	19.9992	20.1489	20.7495	20.4047	19.9182	2	2	2	7	400	46350.9
CG6767	CG6767, isoform G;CG6767, isoform B;CG6767, isoform A;CG6767, isoform C;CG6767, isoform F;CG6767, isoform D	-0.546962	2.12556	22.0534	22.2822	22.2379	21.5274	22.8019	23.286	22.9498	23.054	10	10	10	24.7	371	40679.9
CG30122	CG30122, isoform D;CG30122, isoform B;CG30122, isoform C	-0.54789	2.44679	22.2326	22.7288	22.5075	22.7082	22.1817	22.5144	22.5457	22.2341	10	10	10	10.8	1271	140494
CG11808	CG11808	-0.548047	1.4154	24.751	26.2897	26.6188	26.9993	25.5655	25.9513	25.753	25.8162	7	7	7	38.4	219	25712.4
AdSS	Adenylosuccinate synthetase	-0.55132	0.812541	19.2217	18.455	17.9852	18.2895	18.024	18.1063	18.04	18.9213	1	1	1	3.8	447	48900.9
mRpL37	LD25118p	-0.551555	0.504554	19.6112	19.5962	19.7795	20.0347	21.6657	19.937	19.7885	20.2156	3	3	3	9.8	408	45757.3
Hr4	Hr4, isoform D;Hr4, isoform F;Hr4, isoform E;Hr4, isoform J;Hr4, isoform H;Hr4, isoform G;Hr4, isoform I;Hormone receptor 4	-0.555511	0.515464	17.8927	18.2251	17.801	18.0362	17.5501	17.708	17.3503	NaN	1	1	1	0.9	1842.5	197504
pea	FI05376p	-0.555773	2.27061	22.4135	24.1483	24.1812	24.3681	22.7997	23.0257	22.8048	22.6558	20	20	20	18.1	1242	141936
MED18	Mediator of RNA polymerase II transcription subunit 18	-0.556157	0.179046	NaN	20.3951	20.1544	20.0895	NaN	20.8304	20.3608	20.5549	2	2	2	11.1	217	24672.8
Trap1	FI21274p1	-0.557035	0.415513	18.4303	19.1935	NaN	18.8019	18.224	18.3756	20.6913	18.9695	5	4	4	7.8	691	77963
CG7154	CG7154	-0.559362	2.1919	25.6719	26.6473	26.6063	26.8867	25.9168	26.1803	26.2613	26.2248	20	20	20	35	861	95922.4
PCNA	Proliferating cell nuclear antigen	-0.55992	0.303454	NaN	NaN	NaN	17.3247	NaN	NaN	NaN	18.6402	1	1	1	5	260	28830
brat-RA;brat	Brain tumor, isoform F;Brain tumor, isoform E;Brain tumor protein	-0.562882	0.343958	NaN	18.5835	18.3993	18.6247	NaN	NaN	NaN	NaN	2	2	2	2.6	1037	110366
CG14220-RA	CG14220, isoform A	-0.562993	0.428274	NaN	NaN	16.7572	16.9279	NaN	NaN	NaN	NaN	1	1	1	4	327	38320.2
nudC	Nuclear migration protein NudC	-0.564367	1.91435	22.2764	23.0075	22.8906	23.1682	22.903	23.1247	22.9228	23.4256	9	9	9	26.8	332	37792
CG3800	CCHC-type zinc finger protein CG3800	-0.564547	1.39358	23.1157	22.6837	23.2565	23.2218	21.998	22.5285	21.9648	22.3299	7	7	7	48.5	165	17614.6
CG14200	CG14200, isoform C;CG14200, isoform B;CG14200, isoform A	-0.565909	0.20242	NaN	20.0294	20.6088	20.7208	NaN	20.3562	19.9396	19.7256	4	4	4	3.6	2020	220530
RpL26	RE17611p	-0.566147	2.90438	25.9902	26.2034	26.2347	26.1199	26.1688	26.2168	26.1037	26.1608	14	14	14	62.4	149	17281.2
Ptp61F	Tyrosine-protein phosphatase non-receptor type 61F;Protein tyrosine phosphatase 61F, isoform D	-0.567818	1.33693	18.4183	17.1014	17.668	17.3823	17.9984	18.2751	18.2027	18.0552	2	2	2	5.1	532.5	60730.9
Chd64	Calponin-like protein Chd64;Chd64, isoform C	-0.57056	1.53284	24.2148	23.5693	23.6049	23.1263	23.5845	24.0318	23.4114	23.1113	9	9	9	44.1	181.5	20025.1
CG31075	CG31075	-0.571852	1.45149	24.6075	24.3763	23.8526	23.3806	24.7132	24.9913	24.9183	24.8252	14	14	14	34	485	52606.2
CG1815	CG1815, isoform C;CG1815, isoform A;CG1815, isoform B	-0.572	1.8989	20.1947	20.5487	19.7936	19.9116	19.3505	19.4814	19.6362	19.6304	5	5	5	4.4	1664	181889
lola	Longitudinals lacking protein, isoforms F/I/K/T;Longitudinals lacking protein, isoforms H/M/V;Longitudinals lacking protein, isoforms N/O/W/X/Y;Longitudinals lacking protein, isoforms J/P/Q/S/Z;Longitudinals lacking protein, isoforms A/B/D/L;Longitudinals lacking protein, isoform G	-0.572143	0.586216	22.1901	22.1336	22.3903	21.9415	20.9479	21.8869	21.9542	20.506	6	6	2	9.3	666.5	71348.2
lid	Little imaginal discs, isoform C;Lysine-specific demethylase lid	-0.573313	0.686997	18.7736	19.3439	18.867	19.5221	18.9197	18.6796	18.7409	18.5986	3	3	3	2.9	1838	203993
CG1354-RA;CG1354	Obg-like ATPase 1	-0.573607	1.92365	22.2403	22.1957	21.2897	21.8826	23.3388	22.8132	22.7696	22.635	6	6	6	14.6	397	44910.4
ATPCL	ATP citrate lyase, isoform F;ATP citrate lyase, isoform D	-0.5739	1.63568	25.7231	25.1903	25.2414	24.4133	25.3302	25.9261	26.0372	25.5051	33	33	33	39.9	1103.5	120577
Prosbeta6	Proteasome subunit beta type-1	-0.574133	2.6429	22.6669	22.2579	21.9128	21.9544	22.4443	22.2864	22.3664	22.2041	3	3	3	17.4	235	25842.2
Rpn13	Proteasomal ubiquitin receptor ADRM1 homolog	-0.574585	1.6745	22.6399	22.7234	22.5877	22.7416	22.7507	22.8552	22.6749	23.1908	8	8	8	32.1	406.5	43784
Tapdelta	GM12291p	-0.5748	1.78978	22.6718	22.8794	23.2646	23.1033	23.5254	23.8746	24.3519	23.794	6	6	6	28.3	166	17601.2
Ost48	Dolichyl-diphosphooligosaccharide--protein glycosyltransferase 48 kDa subunit	-0.575375	2.85338	22.3647	22.0848	22.0111	21.7967	22.8852	22.5587	22.8863	23.006	10	10	10	35	449	49980.6
RpL14	60S ribosomal protein L14	-0.575838	2.57476	27.137	27.2146	27.3049	27.2701	27.3838	27.418	27.2329	27.3219	15	15	15	52.4	166	19173.5
CG40160	CG40160, isoform A	-0.576072	0.630006	21.4221	19.3064	19.2021	18.2613	19.5975	19.2951	19.6174	18.5878	4	4	4	13.5	421	45646.3
PMCA	Plasma membrane calcium ATPase, isoform I;Plasma membrane calcium ATPase, isoform K;Plasma membrane calcium ATPase, isoform Q;Plasma membrane calcium ATPase, isoform P;Plasma membrane calcium ATPase, isoform R;Plasma membrane calcium ATPase, isoform N	-0.577268	1.98688	22.8552	21.7057	22.2732	22.0041	22.9907	23.2773	22.7463	22.6152	24	24	2	24	1190.5	131202
CG12003	CG12003	-0.580769	0.174312	22.9987	20.5476	16.1148	23.2141	20.6198	NaN	18.0772	17.8403	6	6	6	15.6	456	48958.1
Nab2	BcDNA.LD27873	-0.580908	2.1214	24.8986	25.6079	25.3107	25.6125	24.309	24.144	24.0161	23.8232	13	13	13	16.1	1004	112970
CG5873	CG5873	-0.582494	0.708343	21.0741	18.9294	18.3449	20.5224	18.2446	17.7464	18.3405	18.822	1	1	1	1.9	753	85286.5
Aats-asp	Aspartyl-tRNA synthetase	-0.583189	1.79297	23.1681	22.8283	22.8203	22.9475	23.5302	23.7152	23.5795	23.3825	10	10	10	28.2	531	59059.1
san	Probable N-acetyltransferase san	-0.58328	0.685944	17.9929	19.5307	19.7645	20.0908	21.266	20.3447	20.5092	19.468	2	2	2	17.9	184	20993.9
Rme-8	Receptor mediated endocytosis 8	-0.587225	1.7666	NaN	19.5782	19.8153	19.7652	20.0692	20.1634	20.0245	19.8079	4	4	4	2.5	2408	272548
Act88F	Actin, indirect flight muscle	-0.589182	0.756723	20.636	20.182	20.068	20.156	19.8904	20.0612	20.5309	20.2859	26	2	2	54.5	376	41699.7
Nmt	Glycylpeptide N-tetradecanoyltransferase	-0.58972	1.31617	19.3427	19.132	18.7428	18.9541	20.8936	20.445	19.9759	20.1793	4	4	4	9.3	472	53832.8
MED10	Mediator complex subunit 10, isoform C;Mediator of RNA polymerase II transcription subunit 10	-0.591197	0.160366	NaN	NaN	19.5891	NaN	NaN	NaN	NaN	20.5181	2	2	2	24.1	133	15656.9
CG18428	CG18428	-0.591232	1.37687	26.175	27.0424	26.9	27.3519	26.148	26.3867	25.4674	25.9251	11	11	11	40.3	144	16871.1
Akap200	A kinase anchor protein 200, isoform B	-0.593595	1.44473	NaN	19.8197	20.036	20.0198	20.5956	19.608	20.0815	20.027	10	1	1	32.5	372	38168.2
ade5	Multifunctional protein ADE2;Ade5, isoform B	-0.594017	1.97233	24.5774	24.1441	24.0035	23.9257	24.862	24.8212	25.0352	24.6635	12	12	12	30.8	428.5	47224.4
verm	LD36620p;Vermiform, isoform H;Vermiform, isoform I	-0.59421	0.945031	20.8249	21.4027	21.4188	21.3834	22.2453	22.4519	22.0639	21.4958	4	4	4	10.3	531	60200.8
lqfR	Liquid facets-Related, isoform D;GH02671p	-0.595584	0.21693	20.5198	19.7315	19.302	20.9952	19.7281	NaN	19.638	19.8487	2	2	2	4.1	1032	113695
Mtor	Nucleoprotein TPR	-0.596397	2.85997	27.0375	27.5035	27.4145	27.4541	26.5733	26.4535	26.5149	26.2142	105	105	105	46.5	2346	262353
RpL23A	FI01658p	-0.597077	2.12729	27.6457	27.6186	27.7149	27.8192	27.9406	27.8239	27.6859	27.4629	22	22	22	45.1	277	29463.2
NAT1	NAT1, isoform C	-0.597253	1.48391	22.4252	21.7822	22.188	21.6928	21.4169	22.1425	21.4544	22.0443	14	14	14	12.6	1526	166888
CG10098	CG10098	-0.597836	0.818444	21.3906	20.6901	20.9772	20.9247	21.4046	21.5928	21.8881	21.3736	3	3	3	13.3	353	37481.8
Trx-2	Thioredoxin-2	-0.599267	1.15978	22.7672	22.4285	21.7395	21.4932	22.5856	22.3145	22.3453	22.0661	4	4	4	30.2	110	12216.2
CG13082-RA	CG13082	-0.600693	3.47243	25.1211	23.6195	23.8514	24.0204	24.1538	24.0347	23.8548	24.0527	5	5	5	14.6	377	41637.5
l(2)37Cc	Lethal (2) 37Cc, isoform D;Protein l(2)37Cc	-0.602087	0.930703	23.8659	23.0442	22.8938	22.5292	22.6504	22.896	24.0043	23.4433	14	14	14	58.7	276	30383.8
CG9248	CG9248, isoform A	-0.60382	1.10994	18.6694	19.3899	19.2109	19.4087	20.8085	20.7263	20.7061	19.7463	4	4	4	11.3	494	55587.4
CG5516	CG5516	-0.604148	1.10936	21.2186	22.1985	22.2755	22.4793	21.5261	21.1206	21.1839	20.8252	3	3	3	13.6	176	18941.2
CG3702	CG3702, isoform A	-0.604599	1.9032	NaN	18.5737	18.1985	18.3937	19.1456	18.6955	18.6417	18.8842	1	1	1	2.7	641	73600.3
how	Held out wings, isoform E;Held out wings, isoform D;Protein held out wings	-0.605047	3.5362	22.0566	21.5693	21.3967	21.522	21.3854	21.3562	21.2804	21.2983	6	6	6	21.8	404	44226.4
bon	Bonus, isoform B;Bonus, isoform A	-0.605073	0.589747	18.4646	18.6605	18.7628	20.1255	19.0884	18.3735	18.7065	NaN	2	2	2	2	1129	121549
CG5787	CG5787, isoform A	-0.605927	2.77807	25.2649	25.0143	24.853	24.9516	24.1308	23.8893	23.6968	23.6467	30	30	30	45.1	950	100258
P32	CG6459	-0.6066	2.21997	21.6071	22.7088	22.0877	22.1195	22.1392	21.5947	21.8666	21.8113	5	5	5	30.8	263	28975.6
CG6621	Tetratricopeptide repeat protein 14 homolog	-0.607153	0.846285	21.2281	21.7885	22.2273	22.4333	20.2866	21.3952	21.4947	21.0758	8	8	8	12.6	872	99870
SF2	LD40489p	-0.608888	2.48631	24.9357	24.9176	25.2533	25.296	24.0914	24.2432	23.9119	23.7512	14	14	14	52.5	255	28350.1
Cpr100A	Cuticular protein 100A	-0.609158	0.683429	26.4268	25.6325	24.9764	24.3114	25.335	23.8041	23.5394	23.841	8	8	8	35.7	241	27099.3
Vha36-1;Vha36-3	V-type proton ATPase subunit D 1;Vacuolar H[+] ATPase 36kD subunit 3, isoform C;Probable V-type proton ATPase subunit D 2	-0.609531	0.323739	20.1385	19.3692	19.8619	19.7428	NaN	20.0856	20.7886	20.0326	4	4	4	18.7	249	28137.8
RpL31	60S ribosomal protein L31	-0.610418	2.05262	25.5664	26.0725	26.2516	26.2334	25.8772	25.8999	25.5359	26.23	10	10	10	56.5	124	14532.6
CG5792	CG5792, isoform D	-0.61085	1.88577	24.0737	24.3271	24.3687	24.527	23.3585	22.7626	22.6707	22.7507	23	23	23	25.7	1094	127597
Oscp	ATP synthase subunit O, mitochondrial	-0.6126	0.723328	23.0229	22.7233	23.2234	22.1843	22.5597	23.3492	23.2668	23.473	5	5	5	23.9	209	22422.2
Pitslre	Serine/threonine-protein kinase PITSLRE;GH16248p	-0.613922	2.76975	22.158	23.1305	23.5773	23.8615	22.417	22.5196	22.3392	22.2157	15	15	15	17.5	865	98818.5
CG3011	Serine hydroxymethyltransferase	-0.61615	1.42137	24.593	24.5442	24.44	23.8167	24.1439	25.0279	24.85	24.9545	16	16	16	43.3	502	54892.8
sbb	Brakeless-B;Scribbler, isoform G	-0.617105	0.245667	NaN	NaN	18.4158	18.5529	17.9828	NaN	NaN	17.7263	1	1	1	0.7	2307	230611
Mtp	Microsomal triacylglycerol transfer protein	-0.61758	0.731701	20.8549	20.0011	19.69	19.4362	20.1127	20.8257	20.6707	19.661	6	6	6	8	886	98776
rept	Reptin, isoform B;RuvB-like helicase 2	-0.619268	2.93669	23.8853	24.288	24.1487	24.1458	23.2526	23.7009	23.494	23.451	18	18	18	39.5	481	53541.2
msps	LP04448p;Mini spindles, isoform B	-0.619708	1.75092	18.5537	19.1445	18.9991	18.4219	18.9685	18.8342	18.91	18.5969	2	2	2	1.4	2046	226412
ytr	LD12035p	-0.621763	0.342602	19.246	18.5223	20.1533	20.0308	18.1244	19.1709	NaN	17.2715	3	3	3	19.6	194	21544.7
CG5886	CG5886	-0.622143	1.19915	20.2923	20.3725	20.016	20.1977	19.6801	20.7277	20.0654	20.758	4	4	4	8.5	515	59029.2
RpL38	60S ribosomal protein L38	-0.622415	1.55004	23.7835	23.2233	23.7653	24.0678	23.6036	23.4435	23.1183	23.6308	5	5	5	45.7	70	8199.75
CG10131	CG10131	-0.622911	0.284806	NaN	17.1368	16.455	16.5856	NaN	NaN	NaN	17.6641	1	1	1	3.8	315	35150.2
PHGPx	Glutathione peroxidase	-0.622971	1.68491	23.252	22.5838	23.382	23.386	23.0561	23.6665	23.6129	23.2608	9	9	9	54.4	198	21867.1
RpL4	60S ribosomal protein L4	-0.625682	2.502	29.143	29.3189	29.4377	29.505	29.0837	29.3493	29.2725	29.1854	36	36	36	67.6	401	45025.8
Act87E	Actin-87E	-0.628313	1.00506	23.1566	22.7631	23.4821	22.6622	23.2849	23.5643	23.83	22.5679	27	1	0	62.5	376	41801.9
Nup205	Nucleoporin 205kD, isoform A;Nucleoporin 205kD, isoform B	-0.628365	0.254191	20.2223	20.4492	20.2175	19.8815	20.3705	20.9233	20.4669	NaN	5	5	5	3.2	2078.5	233939
RpL28	MIP15344p;60S ribosomal protein L28	-0.628708	2.50667	27.5083	27.483	27.5351	27.5952	27.334	27.1816	27.3765	27.5162	17	17	15	65.3	144	16028.9
Mdh1	Malate dehydrogenase	-0.63112	1.79331	21.81	21.1876	22.0215	20.7944	22.0773	22.3202	22.6289	21.8273	7	7	7	30.9	337	36058.5
CG8993	CG8993	-0.631288	2.61411	21.0613	20.5074	20.9125	20.2504	21.1319	20.9801	20.8883	21.3191	3	3	3	23.9	142	15857.4
Snap29	Synaptosomal-associated protein	-0.632245	0.578769	NaN	NaN	NaN	18.1751	NaN	18.7222	NaN	18.6882	1	1	1	4.6	284	31595.8
Nup50	CG2158	-0.632857	1.68053	22.1423	21.954	22.0036	22.1248	21.6206	21.6764	21.0378	21.4353	11	11	11	26.8	564	59434.3
RpL10	Ribosomal protein L10, isoform E;60S ribosomal protein L10	-0.63493	2.40532	26.5795	26.7567	26.9014	26.6199	26.6287	26.5553	26.4614	26.4357	15	15	15	59.2	218	25527.6
Hsp60C	60 kDa heat shock protein homolog 2, mitochondrial	-0.634987	0.185234	19.8347	19.1356	18.9465	18.5177	19.8233	NaN	19.3375	NaN	8	2	2	21	576	61587.2
Jabba	CG42351, isoform E;CG42351, isoform C;CG42351, isoform D	-0.635582	1.30481	21.5454	22.4039	22.6664	23.0785	22.2768	21.9656	22.9223	22.6812	11	11	3	29.5	438	49319.5
Aats-gln	Probable glutamine--tRNA ligase	-0.636844	0.387239	19.7809	21.0885	22.4381	21.5037	21.9711	22.2211	24.604	21.3723	8	8	8	11.8	778	87508.2
pug	C-1-tetrahydrofolate synthase, cytoplasmic	-0.63875	2.61066	23.2977	23.6636	23.3966	23.455	23.8673	23.6243	23.8254	24.0672	22	22	22	29.8	951	101566
mey	CG12063	-0.64003	0.672455	23.003	21.8002	19.813	19.3746	19.9805	19.2351	20.3736	19.3215	8	6	6	10.5	774	83882.2
PyK	Pyruvate kinase	-0.640573	2.87154	27.5427	27.0799	27.0498	26.9134	27.2847	27.5859	27.7902	27.5498	26	26	26	65.2	522.5	56249.5
e(y)1	Transcription initiation factor TFIID subunit 9	-0.64251	1.52301	25.1772	25.6571	26.1658	26.2898	25.4618	25.4552	25.9332	25.4339	19	19	19	66.9	278	29314.4
Gdh	Glutamate dehydrogenase, mitochondrial;Glutamate dehydrogenase	-0.643139	1.93786	22.4694	22.294	22.1397	21.8987	22.7028	22.9899	23.2335	22.444	17	17	17	34.4	549	61081.8
RpL24	Ribosomal protein L24, isoform B;60S ribosomal protein L24	-0.64513	2.06581	26.181	26.9147	27.0654	27.4894	26.739	26.8641	27.2655	26.7982	11	11	11	43.2	155	17519.9
kon	Kon-tiki, isoform B	-0.645185	0.125469	13.0115	NaN	NaN	11.7433	15.1707	11.9834	15.433	NaN	81	81	81	41.7	2381	270661
CG13551	CG13551, isoform C	-0.645273	0.76254	19.4221	17.3846	17.6425	17.9102	18.3389	18.7369	17.3702	17.296	1	1	1	16.1	87	9716.67
CG2926	CG2926	-0.64582	1.78318	23.7038	24.7397	24.9563	25.0234	23.0875	23.3572	23.4082	23.8405	17	17	17	10.5	2296	253239
unc-45	FI21225p1	-0.648187	2.01498	22.2987	21.2871	21.3938	21.2567	21.8161	21.5178	21.6832	21.4777	10	10	10	12.4	947	105048
RpL19	60S ribosomal protein L19	-0.64889	2.45045	26.6492	26.8738	26.8387	26.8526	26.6966	26.5718	26.5569	26.413	15	15	15	43.8	203	23998.4
Atu	Another transcription unit protein	-0.649045	2.19868	27.7015	29.0408	28.656	29.0587	28.0846	28.0655	28.3487	27.9404	26	26	26	29.8	725	77422.3
CG13081	CG13081, isoform A	-0.64909	1.28446	23.2992	23.2465	23.2524	23.4016	24.076	23.5205	23.8072	23.5815	3	3	3	16.9	177	19775.4
RpS10b	Ribosomal protein S10b, isoform D;40S ribosomal protein S10b	-0.651415	1.99837	25.0912	24.0559	23.8386	23.8585	24.2208	24.1387	24.5401	24.5131	9	9	9	56.9	160	17878.3
CG4452	CG4452, isoform A	-0.651632	1.76552	NaN	19.8796	19.4188	19.653	19.0575	19.0726	18.7815	19.0123	1	1	1	6.7	390	42795.6
Pep	Protein on ecdysone puffs, isoform D;Zinc finger protein on ecdysone puffs	-0.651972	2.19949	25.6289	24.6279	24.5473	24.7103	23.9408	23.753	23.8802	23.8768	18	18	18	31.3	693	75599.2
CG9911	CG9911, isoform C;CG9911, isoform A	-0.652728	1.38639	22.0816	21.4971	21.2259	21.5612	22.0456	21.9798	21.0265	21.354	8	8	8	18.7	393.5	45201.3
fl(2)d	Pre-mRNA-splicing regulator female-lethal(2)D	-0.653445	2.23275	25.2747	25.9228	26.0408	26.3958	24.5202	25.0275	24.8378	24.7994	18	18	18	34.9	474	52184
Flo-1	Flotillin-1	-0.65723	1.00353	21.6673	21.3616	22.3355	21.0593	20.9575	22.1458	22.1122	21.2775	20	20	1	49.1	426	47135.2
Mhc	Myosin heavy chain, muscle	-0.658078	1.02458	19.6208	19.536	NaN	18.2553	17.6284	17.7453	18.825	18.4592	170	2	0	64.6	1962	224542
CD98hc	CD98 heavy chain	-0.658988	0.345909	20.5861	20.3936	20.0007	19.6761	NaN	20.2179	20.8915	19.4867	5	5	5	12.7	565	62677.1
ix	Mediator of RNA polymerase II transcription subunit 29	-0.659653	1.71799	20.8579	22.4664	21.746	22.0281	21.7395	21.4658	21.6479	21.4184	3	3	3	22.3	188	21147
RpL3	60S ribosomal protein L3	-0.660713	2.48247	27.9585	28.3487	28.2723	28.2546	28.2031	28.054	28.1236	27.8401	34	34	34	66.8	409.5	46176
Klp10A	Kinesin-like protein at 10A, isoform B;Kinesin-like protein Klp10A	-0.661073	1.98155	21.3361	21.9909	21.4607	21.4905	21.2006	21.2093	20.9778	21.1498	8	8	8	12.7	805	88671.9
resilin	Pro-resilin	-0.662614	0.826473	18.8982	16.3522	16.3671	16.0674	16.4759	16.1229	NaN	NaN	1	1	1	4.2	597.5	56064.9
Map205	Microtubule-associated protein 205, isoform B;205 kDa microtubule-associated protein	-0.66768	2.59292	26.0631	25.7543	25.8565	25.8787	25.7344	25.5374	25.3834	25.2761	30	30	30	30	1174	125434
CG14244	CG14244	-0.670697	0.100923	24.9601	25.3692	24.4796	24.3929	18.1913	17.5452	24.3918	23.5134	4	4	4	53.1	81	9185.35
Hsc70-1	Heat shock 70 kDa protein cognate 1;AT07372p	-0.670733	0.0951107	21.3462	21.2917	NaN	NaN	NaN	22.4504	21.7402	NaN	10	2	1	19	598	66016.6
FKBP59	FK506-binding protein FKBP59, isoform B;FK506-binding protein 59	-0.671875	3.58037	22.2421	23.0198	22.5356	23.8169	23.4522	23.3236	23.1887	23.3247	9	9	9	22.6	439	48795.3
Rpb8	GM03174p	-0.672688	0.500165	22.3819	23.054	22.5139	21.9017	21.5382	20.6148	20.9639	19.8688	4	4	4	38.3	149	17203.5
Xe7	Xe7, isoform A;Xe7, isoform B	-0.673965	1.29904	21.4013	22.4251	22.4692	22.7955	21.0155	21.4054	20.689	20.9998	10	10	10	14.2	715.5	83218.3
Ccdc56	Cytochrome c oxidase assembly factor 3, mitochondrial	-0.675423	0.349164	NaN	18.3858	18.1536	18.1895	19.5658	19.7416	20.0235	NaN	1	1	1	10.3	87	9862.38
Mfap1	GH07619p	-0.676388	0.619717	19.8821	22.7976	23.4215	23.3279	19.7316	21.6215	21.6168	21.9182	11	11	11	29.3	478	56134.7
CG5706	Probable phenylalanine--tRNA ligase beta subunit	-0.676652	0.149724	19.9875	19.7695	20.0342	19.7398	NaN	21.4085	NaN	20.1233	3	3	3	6.1	589	65778
tho2	LD36155p;Tho2, isoform B;Tho2, isoform C	-0.677442	3.43706	22.0357	23.4922	23.3797	23.3123	22.1976	21.8997	22.0604	22.0622	18	18	18	14.3	1641	188509
AcCoAS	Acetyl coenzyme A synthase, isoform D;Acetyl-coenzyme A synthetase	-0.68186	0.348403	21.8915	20.9352	20.9663	19.9938	18.0767	18.8896	21.1382	20.2061	8	8	8	19.1	670	75945.5
Dsp1-RC;Dsp1	Dorsal switch protein 1, isoform G;Dorsal switch protein 1, isoform F;High mobility group protein DSP1	-0.682585	1.79519	20.3274	20.1471	20.3737	20.3031	20.5856	20.6353	20.5321	19.9945	1	1	1	3.4	386	44035.7
CG12608	CG12608	-0.686745	1.5958	25.4426	26.7496	27.0246	27.0079	25.9568	25.6086	26.3881	26.1431	18	18	12	48.1	443	49143.7
Mpcp	MIP08013p1	-0.687505	2.09811	23.382	23.9952	23.89	24.2619	24.66	24.4697	24.5613	24.8767	8	8	7	23.9	356	38850.4
beag	CG18005	-0.688843	0.897589	20.191	23.7632	21.7867	21.7695	19.2448	20.42	19.5231	18.9885	5	5	5	14.9	557	61390.1
mor	Brahma associated protein 155 kDa	-0.689175	2.19939	26.6309	27.256	27.4839	27.764	26.915	26.8839	26.7363	26.3687	45	45	45	39.6	1209	131361
up	Upheld, isoform H;Troponin T, skeletal muscle	-0.692455	0.34816	17.964	19.8099	19.724	19.3175	17.0987	18.1338	18.6063	18.8222	24	1	0	43.9	381.5	45783.2
CG13625	CG13625	-0.695007	1.15573	19.493	20.3975	20.9449	21.8058	20.1579	19.5399	19.8597	19.997	6	6	6	11.6	647	76497.6
Spt6-RA;Spt6	FI21108p1;Transcription elongation factor SPT6	-0.695344	3.46201	23.0401	24.2921	24.1385	24.1906	22.9192	23.2819	23.0753	23.0684	27	27	27	19.3	1831	208599
heph	Hephaestus, isoform C;Hephaestus;Hephaestus, isoform G;Hephaestus, isoform L;Hephaestus, isoform Q	-0.697587	1.11799	22.2869	23.0717	22.7492	22.3939	23.046	22.7957	22.5037	21.633	9	9	9	18.4	608	65511.7
yrt	Yurt delta;Yurt, isoform D;LD33734p;Yurt gamma	-0.699221	0.686142	20.0902	20.7057	20.9524	21.0331	19.983	19.9855	19.6284	21.5801	5	5	5	8.5	925.5	100257
CG3523	CG3523, isoform A;CG3523, isoform C	-0.70208	2.24839	28.5085	28.0173	28.1878	27.402	28.0895	28.6412	28.4943	28.2874	129	129	125	63.6	2489	272222
prtp	Pretaporter, isoform D;LD24756p	-0.703995	1.70991	21.5706	22.2064	21.2914	21.9746	21.6581	22.3171	21.689	21.5687	9	9	9	28.9	384.5	43217.7
ppl	Glycine cleavage system H protein, mitochondrial	-0.704065	3.8106	21.6264	21.8099	21.067	21.2399	21.7924	21.7471	21.687	21.6445	2	2	2	12.7	165	18002.4
scrib	Scribbled, isoform J;Scribbled, isoform M;Scribbled, isoform L;Protein lap4	-0.707582	2.6794	21.968	22.2695	22.3893	22.2227	21.8567	21.8605	21.6317	21.4503	11	11	11	8.5	1895	205312
eIF2B-gamma	eIF2B-gamma	-0.715961	0.486444	18.4433	18.7621	18.999	18.5983	18.6876	NaN	18.5875	19.4061	2	2	2	4.4	455	50671.3
Nup98-96	Nup98	-0.71626	0.503471	19.4332	19.4331	19.2518	19.6329	19.298	18.9433	18.9205	NaN	4	4	4	2.9	1960	210139
CG14817-RA	CG14817, isoform A	-0.717462	0.296145	NaN	NaN	NaN	17.8611	NaN	NaN	NaN	NaN	1	1	1	13.2	106	12829.1
RpL13	60S ribosomal protein L13	-0.720638	3.60277	27.5069	27.7881	27.7802	27.8621	27.7225	27.7068	27.6878	27.4129	23	23	23	60.1	218	24951.2
CG2852	Peptidyl-prolyl cis-trans isomerase	-0.721147	0.807686	19.1974	18.2497	17.7655	18.1619	19.1414	17.901	17.4572	17.8267	1	1	1	4.9	205	22199.3
Trf2	TATA box binding protein-related factor 2, isoform I;TATA box binding protein-related factor 2, isoform E	-0.721467	0.98752	NaN	18.1244	NaN	19.1868	18.2033	16.4676	17.2239	17.4498	2	2	2	1.2	1714.5	194668
mRpS34	Mitochondrial ribosomal protein S34	-0.722648	0.752987	NaN	17.9527	17.9084	NaN	NaN	NaN	NaN	18.1125	2	2	2	14.9	188	21611.2
CG1910	CG1910, isoform B;CG1910, isoform C;CG1910, isoform A	-0.723863	0.803095	NaN	18.0073	18.4284	18.5384	19.3519	18.5869	18.8957	18.2425	4	4	4	16.4	466	49323.7
Act79B	Actin 79B, isoform B;Actin, larval muscle	-0.724155	2.40181	19.9515	20.8948	20.2996	19.9813	19.4472	19.3534	19.6137	19.7119	22	3	3	59.6	376	41786.8
capt	Adenylyl cyclase-associated protein	-0.72607	2.49661	22.5301	21.7382	21.3963	21.34	21.4566	21.841	21.9388	21.7758	6	6	6	20	603.5	65045.7
msk	D-Importin 7/RanBP7	-0.726485	1.18498	NaN	19.3804	19.4936	19.4967	19.7805	19.6457	19.3446	19.4511	4	4	4	4.8	1049	119311
Cyt-b5-r	Cytochrome b5-related, isoform B;Cytochrome b5-related protein	-0.727862	1.43437	22.2393	22.118	22.7967	21.9403	22.1098	22.6869	21.9171	21.7029	5	5	5	17.7	436	50355.1
CG7573	CG7573	-0.729938	0.321263	18.8547	18.7968	18.3421	NaN	18.9891	NaN	NaN	NaN	1	1	1	2.5	477	54916.7
pAbp	Polyadenylate-binding protein	-0.73014	3.09801	27.9105	27.7588	27.7705	28.044	27.4347	27.9534	27.6309	27.6063	33	33	33	65.5	634	69925.4
CG32176	CG32176	-0.730216	1.14333	19.0163	19.6592	19.2901	19.7756	18.201	17.2833	18.6936	18.2988	2	2	2	3.3	581	65173.4
Hsp26	Heat shock protein 26, isoform B;Heat shock protein 26	-0.732691	1.23165	26.7299	25.9063	26.1901	26.2067	27.1658	26.493	26.1345	25.8396	12	12	12	71.6	208	22994.1
CG15160-RA;CG15160	CG15160, isoform A;CG15160, isoform B;CG15160, isoform C	-0.736805	1.09466	18.2243	18.8714	18.9553	18.9151	17.9363	18.2395	18.1485	17.8401	2	2	2	3.8	822	90966.3
Zn72D	MIP27703p;GH12756p;Zinc-finger protein at 72D, isoform B	-0.737885	1.1663	21.217	19.469	19.5156	19.8329	19.6495	18.9162	20.2	18.8656	3	3	3	5.9	635	68457.1
pst	Pastrel, isoform E;GH06117p	-0.738018	0.864125	NaN	20.0869	20.1642	19.3895	21.325	21.3902	21.0596	19.8654	4	4	4	7.8	694.5	76035.4
Taf13	RE52427p	-0.741157	0.185674	21.9184	22.5624	23.6404	23.6	23.6382	23.6551	17.7723	24.4702	4	4	4	27.9	136	15745.8
Rpb12	CG34186	-0.741474	0.683794	NaN	NaN	17.1629	18.3552	NaN	NaN	NaN	16.7483	1	1	1	17.5	57	6841.93
CG5220	Putative tRNA (cytidine(32)/guanosine(34)-2'-O)-methyltransferase 1	-0.741722	0.415303	NaN	NaN	17.7371	18.0957	NaN	18.5205	18.2074	18.2842	1	1	1	5.3	302	33402
Neos	Neosin, isoform A	-0.742372	2.24676	19.5224	20.5195	19.9512	20.9643	19.2221	19.2566	19.4905	19.4619	5	5	5	16.4	371	41184.2
swm	LD45403p;Second mitotic wave missing, isoform C	-0.742668	0.799374	NaN	NaN	17.3574	NaN	NaN	NaN	NaN	NaN	1	1	1	1.4	1062.5	115781
CG12017;CG12017-RA	CG12017, isoform D;CG12017, isoform C;CG12017, isoform A	-0.7495	1.11188	19.3608	19.1982	18.9766	17.1935	18.4162	17.9862	18.5685	17.9784	1	1	1	2.9	589	65425.8
Sce	E3 ubiquitin-protein ligase RING1	-0.749883	1.50356	18.3147	19.1339	18.8841	18.7649	17.88	18.3373	17.7842	18.9542	1	1	1	4.4	435	47255.8
Hcf	Host cell factor	-0.750768	2.69829	24.2026	24.8486	25.0937	25.2803	23.7707	24.1777	23.9598	24.2964	35	35	35	32.7	1484	158557
CG7857-RA	CG7857	-0.751431	0.420701	NaN	18.0864	18.5056	18.7983	NaN	18.8942	18.8766	18.4697	2	2	2	5.8	312	35252.8
Saf-B	CG6995, isoform B;CG6995, isoform A	-0.7536	2.34076	23.7506	23.1876	23.4018	23.4725	22.6919	22.8286	22.2319	22.3804	15	15	15	16.7	797	87647.2
stwl	Stonewall, isoform B;LD17962p	-0.753948	0.829436	24.3029	23.577	22.8333	21.9294	22.4891	21.7792	22.2296	20.6344	4	4	4	5.6	1018	110731
CG30197	CG30197	-0.75527	0.328807	18.9383	18.7252	18.694	19.3856	18.9739	19.5366	19.4012	NaN	1	1	1	18.6	113	11633.4
2019-09-02	Septin-1	-0.756522	1.14613	19.6141	20.1351	19.8465	19.7577	19.7362	19.4484	19.5917	20.8514	3	3	3	13.9	361	41131.2
Sec61beta	FI02994p	-0.756613	0.99513	21.6334	20.6269	20.3579	20.7132	21.7597	20.6712	20.7935	19.9785	2	2	2	26	100	10245.7
Flo2;Flo-2	Flotillin 2, isoform F;Flotillin 2, isoform I;Flotillin 2, isoform K;Flotillin 2, isoform L;Flotillin 2, isoform J;Flotillin-2;Flo-2-PD;Flotillin 2, isoform G	-0.760543	0.567917	21.0584	20.7955	22.1805	19.739	22.6789	20.512	22.0908	20.1515	18	18	18	42.1	425	46602.4
CG6695	CG6695, isoform A;CG6695, isoform B	-0.763077	2.60357	21.7159	22.883	22.9797	23.155	21.5599	21.7478	21.5578	21.3223	11	11	11	14.2	838	94626.2
Bap60	Brahma-associated protein of 60 kDa	-0.763762	1.96995	22.6218	23.6917	23.7978	23.6041	22.8897	22.5768	23.0885	22.3894	10	10	10	21	515	58170.3
IntS3	Integrator complex subunit 3 homolog	-0.763918	0.388256	NaN	18.8491	19.01	19.0346	NaN	NaN	NaN	17.9754	1	1	1	2.3	962	111617
HIP-R;HIP	Hsc/Hsp70-interacting protein related, isoform B;Hsc70-interacting protein 2;Hsc70-interacting protein 1	-0.765658	2.09091	22.5195	22.9314	22.8485	22.9683	22.5481	23.1694	22.6389	22.5599	8	8	8	22.8	377	41036.8
AnxB9	Annexin B9	-0.766414	1.88568	21.8729	21.7374	21.7158	21.1803	21.9405	22.0154	22.5283	21.7387	6	6	6	20.1	324	36057.8
Rho1	Rho1, isoform C;Ras-like GTP-binding protein Rho1	-0.766921	1.01604	19.9755	19.9392	17.9665	18.5601	19.4677	18.7004	19.9386	18.5517	2	2	2	12.5	192	21723.2
Gl	Dynactin subunit 1	-0.76696	2.76332	20.0098	19.4909	19.5811	19.6056	20.0072	19.9459	19.7904	19.7018	6	6	6	5.3	1265	141218
RpL22	60S ribosomal protein L22	-0.767282	3.31844	26.5848	26.3894	26.4747	26.392	26.1234	25.8674	26.2481	25.9402	17	17	17	56.5	299	30610.6
spz3	RE22741p	-0.771152	0.476967	19.8169	18.5399	18.0014	18.0249	19.0008	17.6223	NaN	17.205	2	2	2	5.1	611	67125.8
Rbp2	FI04456p;RNA-binding protein 2, isoform D;RNA-binding protein 2, isoform E;RNA-binding protein 2, isoform B;RNA-binding protein 2, isoform A	-0.771313	1.9878	23.5997	23.389	23.4232	23.1841	23.1387	22.8751	23.253	22.7759	10	10	10	45.8	325	35061.1
Snr1	GH08712p	-0.77417	2.08446	23.2824	24.3676	24.6256	24.8299	24.215	23.8914	23.5672	23.6362	7	7	7	22.2	370	41911.4
RpS25	40S ribosomal protein S25	-0.775968	1.7959	24.2445	24.7133	24.9743	25.1096	24.3374	24.7329	24.6649	24.0884	7	7	7	44.4	117	13201.5
Pgm	Phosphoglucomutase	-0.777061	3.51417	22.3578	21.9284	21.2605	21.3291	22.107	21.854	22.2295	22.0993	8	8	8	22.3	560	60766.2
pzg	LD15904p	-0.777362	3.32973	25.336	25.4611	25.6571	25.8973	25.2512	24.8613	24.9663	24.9221	23	23	23	31	996	105081
MTA1-like	MTA1-like, isoform B;MTA1-like, isoform A;MTA1-like, isoform C	-0.77956	0.581294	22.5974	22.3566	22.1072	21.652	22.3656	21.7934	21.5868	21.1042	12	12	12	18.7	853	93699
dy	Dusky	-0.781525	1.32479	21.3262	NaN	19.9421	19.9054	19.7012	19.801	19.7409	19.3753	2	2	2	6.7	699	77926.2
crol	Crooked legs, isoform H;CROL GAMMA;Crooked legs, isoform D;Crooked legs, isoform G;CROL BETA;Crooked legs, isoform F;CROL ALPHA	-0.782149	2.6361	21.9428	22.0937	21.7132	21.8083	20.5935	21.0612	21.0583	20.931	2	2	2	5.1	878	96394.6
hts	Protein hu-li tai shao	-0.78296	3.56245	26.4013	26.4348	26.3375	26.32	25.9007	25.7502	25.6756	25.4625	24	24	10	50.6	718	79338.8
RpL34b	RH48056p	-0.788691	2.03313	26.3934	25.9744	26.3929	26.2303	26.2037	26.4291	25.9346	25.6695	8	8	2	34.5	168	18431
casp	Caspar, isoform A	-0.788796	0.430077	NaN	NaN	NaN	NaN	NaN	NaN	NaN	17.7618	1	1	1	2.9	695	78440.6
CG6543	CG6543, isoform A	-0.789385	3.15737	23.3831	23.7897	23.6621	23.5452	24.0884	23.6811	24.1206	23.9242	11	11	11	37.6	295	31582.3
Rbbp5	Retinoblastoma-binding protein 5 homolog	-0.790894	0.185304	21.1026	21.3635	21.8727	22.2459	NaN	NaN	NaN	20.7999	1	1	1	4.7	489	54406.3
CG32068	1,2-dihydroxy-3-keto-5-methylthiopentene dioxygenase	-0.794024	1.32938	NaN	NaN	17.8617	17.5731	NaN	NaN	NaN	17.7984	1	1	1	8.6	186	22254.9
p24-1	RE49489p	-0.796487	0.873368	NaN	17.3232	17.7004	18.4019	21.327	19.8416	21.6284	20.3477	1	1	1	6.2	210	23501.6
Cfp1	Cfp1, isoform B;CXXC-type zinc finger protein 1	-0.797978	0.814238	20.3709	21.3372	21.2917	21.2956	20.5142	19.8068	20.2143	18.7002	5	5	5	7	653	75569.1
CG15100	CG15100	-0.79863	2.06796	21.4172	21.2607	21.0587	21.3941	22.2891	22.0411	22.2158	22.4784	11	11	11	17.4	1022	112484
RpL24-like	Probable ribosome biogenesis protein RLP24	-0.799168	0.184216	20.7144	NaN	19.6119	20.3925	21.2466	NaN	NaN	20.1598	3	3	3	20.9	191	22436.1
Sgt	LD24721p	-0.80155	0.824439	20.0293	19.9953	20.1745	20.0773	20.8365	20.8561	20.6778	19.722	5	5	5	16	331	36253.3
su(Hw)	Protein suppressor of hairy wing	-0.802102	1.65965	19.3989	18.4178	18.285	19.5433	18.1007	18.2247	18.0059	18.1325	2	2	2	1.4	941	105780
CG1607	CG1607, isoform A	-0.803843	0.329863	NaN	18.2608	17.8704	17.6196	19.1728	18.4274	18.7295	17.666	2	2	2	5.5	505	55232.3
tbrd-1	CG13597	-0.804866	0.256281	18.6004	19.1754	20.1756	20.3207	18.3305	NaN	21.574	19.2022	4	4	4	8.2	513	59245.4
CG4692	Putative ATP synthase subunit f, mitochondrial	-0.808394	1.90259	22.3039	21.5762	21.775	21.6174	22.4013	22.534	23.1742	22.1417	4	4	4	37.4	120.5	13954.1
Sar1	LD39266p;RE74312p	-0.80901	1.16046	18.9398	17.737	17.9997	17.4859	17.9025	18.465	19.1821	17.9035	1	1	1	8.4	174	19649.5
eIF-4E	Eukaryotic initiation factor 4E, isoform H;Eukaryotic translation initiation factor 4E	-0.812685	1.32731	19.6909	20.1959	19.9026	19.9804	20.9635	20.8467	21.3854	19.8683	5	5	5	25.5	259	29223.7
Set2	Set2, isoform B;Probable histone-lysine N-methyltransferase CG1716	-0.812895	1.79344	21.3618	22.4669	22.2034	22.4979	21.208	20.7538	20.8634	20.5268	14	14	14	7	2313	256791
CG7185	CG7185, isoform B;Cleavage and polyadenylation specificity factor subunit CG7185	-0.814907	0.628889	19.9398	20.4715	21.0524	21.0485	19.3973	18.3299	20.5017	20.9443	4	4	4	10.9	628.5	68610.2
rngi;Capr	Caprin, isoform B;Caprin homolog	-0.81628	1.80069	21.5269	20.9392	21.1277	20.7089	20.0259	21.0867	20.3645	20.7148	6	6	6	9.5	961	103590
CG5941	CG5941, isoform A	-0.818295	1.87711	19.2116	18.9763	19.2125	18.5066	18.8993	19.6104	19.3715	19.3651	2	2	2	14.3	182	20347.8
MED9	Mediator of RNA polymerase II transcription subunit 9	-0.819485	0.335308	18.806	18.7401	19.1016	19.5143	19.0494	19.2272	19.713	NaN	2	2	2	18.8	144	16808.1
mRpL12	GM03767p	-0.823364	0.474327	19.3064	19.2761	18.878	19.3231	20.2563	20.0894	NaN	19.8021	3	3	3	26.9	182	19658
CG10341	CG10341, isoform C;H/ACA ribonucleoprotein complex non-core subunit NAF1	-0.825703	2.14323	NaN	19.699	20.1104	20.1959	20.4434	19.8439	19.8124	19.9428	5	5	5	11.5	563.5	62205.7
CG14419	CG14419	-0.82623	0.871022	16.9492	19.2587	19.6719	19.9172	23.0233	22.464	23.5297	24.1745	3	3	3	13.3	195	20985.3
Lcp65Ag3	FI01403p	-0.8299	0.652706	25.0674	18.7313	18.2088	18.3337	NaN	NaN	NaN	17.7298	5	2	2	74.3	105	11195.4
pdm3	AT16994p;Pou domain motif 3, isoform B	-0.830745	1.19438	NaN	NaN	17.2433	17.9891	NaN	NaN	NaN	17.837	1	1	1	1.2	1022.5	109612
CG1416	CG1416, isoform A	-0.831108	2.049	NaN	19.5453	20.763	20.3697	20.9555	21.4193	20.8888	20.6213	3	3	3	12.7	354	40154.2
CG12082	Ubiquitin carboxyl-terminal hydrolase	-0.834768	1.62205	21.2589	21.2365	21.0777	20.9625	20.4694	21.6882	21.271	20.8789	9	9	9	15.4	827	92091.9
Moca-cyp	Moca-cyp, isoform A;GH23813p	-0.835153	3.35963	24.8993	25.3104	25.8037	25.8786	24.4045	24.6513	24.4018	24.8035	18	18	18	15.2	827.5	96962
RpS23	40S ribosomal protein S23	-0.836437	2.68599	26.3793	26.9553	26.928	27.2817	26.4219	26.654	27.0503	26.4303	11	11	11	50.3	143	16016.6
snRNP-U1-70K	Small ribonucleoprotein particle U1 subunit 70K, isoform C;U1 small nuclear ribonucleoprotein 70 kDa	-0.839998	2.25927	25.0326	26.22	27.006	27.2923	25.9611	25.7252	26.1867	25.9162	23	23	23	54	448	52900.8
Sra-1	Cytoplasmic FMR1-interacting protein	-0.840988	0.273398	NaN	NaN	NaN	18.3071	NaN	NaN	NaN	18.1261	2	2	2	1.9	1291	149261
CG5171-RC;CG5171	Trehalose 6-phosphate phosphatase	-0.841506	0.948807	21.6514	20.3977	20.6147	19.7817	21.2701	20.9484	21.5553	20.1518	10	10	10	37.8	284.5	31947.5
CG8635	Zinc finger CCCH domain-containing protein 15 homolog	-0.84162	2.37823	20.2757	19.2919	18.985	18.614	19.3927	18.9966	18.7251	19.4589	3	3	3	10.6	404	45291.9
CG5514-RA;CG5514	CG5514, isoform A;CG5514, isoform B	-0.841787	1.94846	19.7778	21.0992	21.0691	21.554	19.4529	19.6891	19.8311	20.1756	6	6	6	7.7	1129.5	122916
Ulp1	GH15225p	-0.848725	2.41624	23.0805	23.7168	23.8263	23.9166	22.4851	22.7409	22.5821	22.016	16	16	16	13.9	1513	172261
hyx	Hyrax	-0.848742	2.57959	30.5061	31.3922	31.416	31.6533	30.7449	30.7005	30.3393	30.3818	67	67	67	87	538	61384.5
Hsp67Ba	Heat shock protein 67B1	-0.849465	2.48832	22.3222	23.7099	23.9255	24.0911	23.6507	23.7866	23.4725	23.8582	5	5	5	25.2	238	26591.1
CG5167	CG5167	-0.850663	0.657616	NaN	19.2156	18.654	17.9164	NaN	18.1794	19.0844	18.868	3	3	3	6.7	431	47250.4
Gapdh1	Glyceraldehyde-3-phosphate dehydrogenase 1	-0.850801	1.51066	24.0475	23.2104	23.157	22.7	23.2881	23.4271	24.1486	23.2308	16	4	4	49.4	332	35350.4
CG11208	CG11208	-0.851828	2.06919	19.7198	19.4738	19.6215	19.1356	19.3058	19.6356	20.0674	19.987	5	5	5	12.9	568	62264.8
c12.1	Protein CWC15 homolog	-0.857708	2.1889	25.4274	26.475	26.6431	26.9224	24.9694	25.1599	25.0301	25.137	16	16	16	43.2	259	28411
Cpsf160	Cleavage and polyadenylation specificity factor subunit 1	-0.860128	1.75723	21.0142	23.0372	23.0234	22.8052	21.2162	21.7587	22.4105	21.8782	15	15	15	14.4	1437.5	162701
Cdk12	Cdk12, isoform C;Cyclin-dependent kinase 12	-0.860562	2.47572	24.8567	25.8254	26.1887	26.3878	25.1212	24.8443	24.5916	24.5396	32	32	31	32.2	1157	128333
CG15784	CG15784, isoform A	-0.860595	0.902821	25.3643	27.4023	26.7917	27.0364	26.7452	27.1078	25.4851	26.9376	8	8	8	17	554	62329.3
Tango5	FI17817p1	-0.86372	1.30256	16.8892	17.2952	17.1427	17.0028	17.6813	16.58	16.9521	17.3333	1	1	1	4.3	530	58184
SmB	Small nuclear ribonucleoprotein-associated protein B	-0.868265	2.29967	24.2607	25.6747	25.643	26.1888	24.1528	24.3328	24.4586	24.7661	10	10	10	42.2	199	21020.8
Bap55	Brahma associated protein 55kD	-0.87026	2.74971	25.9563	27.0146	26.9803	27.4647	26.1159	26.3093	25.9538	26.2326	21	21	21	63.8	425	47319.3
CG10417	CG10417, isoform B;Probable protein phosphatase CG10417	-0.870567	1.87956	19.9137	20.3172	20.7489	20.9888	20.3869	21.0577	20.5953	20.3095	5	5	5	10.1	662	72369.9
brm	Brahma, isoform F;Brahma, isoform E;ATP-dependent helicase brm	-0.87109	3.97508	25.7586	26.7882	26.8781	27.0747	26.1378	26.0738	26.0714	25.9632	46	46	46	29	1640	185349
Aats-thr	Threonyl-tRNA synthetase, isoform B;FI05224p	-0.871492	1.85022	20.7892	20.9913	20.4771	20.1398	20.1735	20.2589	20.5105	21.1	5	5	5	8	718.5	82661.8
CG8929	CG8929, isoform C;CG8929, isoform A	-0.871985	1.6665	19.0845	20.1903	19.3052	19.8949	18.7302	18.4471	18.4223	18.1734	4	4	4	6.7	587	65760.6
CG10333	CG10333	-0.872893	1.81277	20.6004	21.045	20.7992	20.9902	19.6738	20.2059	20.7346	20.3029	7	7	7	9.5	822	94546.5
FK506-bp2	12 kDa FK506-binding protein	-0.874589	1.99808	21.5057	20.8577	20.9973	20.3016	20.9621	20.7222	20.3134	20.1494	5	5	5	66.7	108	11666.2
Crk	Crk, isoform D;Crk, isoform E;Adapter molecule Crk	-0.878684	0.475053	18.0377	NaN	17.5533	17.2432	17.7108	17.8599	17.8246	NaN	1	1	1	5.4	263	30248.8
lack	E3 ubiquitin-protein ligase Smurf1	-0.878743	0.726993	NaN	NaN	NaN	NaN	NaN	NaN	NaN	NaN	1	1	1	0.8	1061	115676
Srp9	Signal recognition particle 9 kDa protein	-0.879285	1.54653	24.6177	23.2131	23.8952	23.6084	23.789	23.116	23.3822	24.2458	3	3	3	41.6	77	8974.5
RpL36A	IP17351p	-0.881187	0.785912	23.9897	23.351	23.1119	23.2258	23.6095	23.316	24.3886	22.092	5	5	5	29.8	104	12501
Aats-asn	Asparaginyl-tRNA synthetase, isoform A	-0.881366	3.35544	21.8029	21.6996	21.3205	21.8666	21.5806	21.9526	21.6276	21.4646	9	9	9	21.7	558	63931.6
S6k	Ribosomal protein S6 kinase	-0.88303	0.266313	NaN	NaN	NaN	NaN	NaN	NaN	NaN	20.0891	2	2	2	5.9	490	55427.3
Hexim	CG3508, isoform A;CG3508, isoform B	-0.884063	3.36945	NaN	22.5606	22.9158	23.6825	21.4423	21.3902	21.4565	21.3116	4	4	4	16.9	354.5	38634.9
CG7214	CG7214	-0.885875	1.69082	25.2881	24.0197	23.1545	22.3933	21.8088	20.9601	21.3193	21.3653	1	1	1	19	142	13919.8
Hsp60	60 kDa heat shock protein, mitochondrial	-0.886688	3.05396	24.4832	24.8429	24.8924	24.9074	24.5529	24.8137	24.9402	24.4977	21	21	15	43.8	573	60809
gammaCop	Coatomer subunit gamma	-0.893809	0.39064	NaN	NaN	19.0423	18.9419	NaN	NaN	NaN	NaN	11	1	1	18	878	97205.7
Psi	LD35640p;P-element somatic inhibitor, isoform C;P-element somatic inhibitor, isoform A	-0.89562	2.41999	23.9801	24.2059	23.9516	24.1661	23.4413	23.7004	23.9776	23.111	17	17	17	28.3	796	81587.5
Ssrp	FACT complex subunit Ssrp1	-0.89738	1.53657	23.4867	24.8674	25.2511	25.2565	24.3879	24.0184	25.1759	25.0588	28	28	28	46.9	723	81532.8
CG13627;CG13627-RB	CG13627, isoform A;CG13627, isoform B	-0.90045	0.620593	23.5884	22.1772	20.1385	22.1001	21.8175	19.4311	19.8474	21.2381	5	5	5	10.8	697	77054.2
CG4019;CG4019-RC	CG4019, isoform A;CG4019, isoform C	-0.90094	0.882386	NaN	16.9247	16.5068	NaN	NaN	NaN	NaN	NaN	2	2	2	4	255	27488.9
CG2063	CG2063	-0.902757	2.51499	22.8284	24.0595	24.3046	24.3649	23.1368	23.0537	23.1356	22.4657	9	9	9	28	325	36154.2
Abi	Abelson interacting protein, isoform A	-0.904945	1.48553	18.3229	17.3022	17.5847	18.3968	17.9749	18.1091	18.5094	18.0782	1	1	1	2.1	473	51925.4
CG9577	CG9577	-0.906323	0.946936	19.7081	18.9894	18.6395	18.4513	18.5606	18.3828	18.8895	19.2398	2	2	2	7.7	312	33818.1
CG11148	PERQ amino acid-rich with GYF domain-containing protein CG11148	-0.908797	0.548891	23.0226	21.3366	21.4981	21.4662	21.6643	21.2359	18.35	21.2542	8	8	8	8.4	1570.5	173310
RpL18	60S ribosomal protein L18	-0.91301	2.3214	26.3951	27.2218	27.526	27.4414	27.0274	27.0674	26.7951	27.3525	9	9	9	44.1	188	21664.5
CG10424	ATP-dependent (S)-NAD(P)H-hydrate dehydratase	-0.913693	1.06775	NaN	18.5891	18.734	17.9132	NaN	NaN	NaN	18.7264	1	1	1	3.3	300	32153.1
CG10754	CG10754	-0.91621	2.64558	22.2561	22.7218	23.2143	23.1399	21.8413	21.5203	21.5953	21.5321	6	6	6	24.6	264	30271.6
Hsp23	Heat shock protein 23, isoform B;Heat shock protein 23	-0.916379	6.11732	29.6507	29.0241	29.4369	29.2095	29.2352	29.1699	29.1367	29.1616	22	22	22	97.3	186	20629.3
CG11777	CG11777	-0.916623	2.70613	23.2491	24.605	25.0588	25.0091	24.724	24.1538	24.3154	24.3266	5	5	5	40.4	161	17838.2
Hsp67Bc	Heat shock protein 67B3	-0.921915	1.8261	25.8472	25.6469	24.6356	24.868	25.0417	25.3084	24.8862	24.1423	7	7	7	64.3	199	22180
c550	9 kD basic protein	-0.923018	1.94317	22.9126	21.5619	21.5454	22.1525	22.7126	22.6348	22.8218	21.9877	2	2	2	24.7	81	9033.5
mod(mdg4)	mdg4;Modifier of mdg4	-0.929707	3.86639	21.1755	21.1671	21.5285	21.8053	20.9421	20.8336	20.5495	20.5486	3	3	3	5.6	510	55770.6
Mi-2	Mi-2, isoform D;Mi-2, isoform C;Mi-2, isoform B;Chromodomain-helicase-DNA-binding protein Mi-2 homolog	-0.931023	2.49388	23.4661	23.5749	23.6105	23.7743	22.9734	22.6959	22.6074	23.2137	21	21	21	14.2	1982	224201
CG9603	Probable cytochrome c oxidase subunit 7A, mitochondrial	-0.932622	0.483399	23.0803	22.0594	21.3072	21.3778	21.8834	22.6483	25.2881	21.8862	5	5	5	58.4	89	9901.66
mod	DNA-binding protein modulo	-0.938118	0.786419	20.0684	20.5664	20.2993	20.3722	19.9808	19.9666	20.3732	21.6507	5	5	5	13.3	542	60309.7
Mfe2	Peroxisomal multifunctional enzyme type 2, isoform B;Peroxisomal multifunctional enzyme type 2	-0.93816	0.332255	NaN	NaN	19.5214	18.3915	NaN	NaN	18.8711	19.1839	3	3	3	7	598	64073.2
Rab7	CG5915 protein	-0.93976	3.3208	19.5588	20.1942	19.7978	19.5952	20.1201	20.4003	19.9764	19.9841	2	2	2	10.6	207	23331.3
CG5482	CG5482	-0.940462	1.87621	21.7962	20.6356	20.4464	21.1712	21.9254	22.0595	21.8894	21.194	5	5	5	14.6	397	44861.6
kuk	Kugelkern, isoform A	-0.942602	1.70715	21.7114	21.2762	20.9806	21.2774	21.1415	20.8422	20.6174	19.9167	4	4	4	9.6	570	60160
qkr58E-2	Quaking related 58E-2	-0.943891	0.873409	20.4344	21.1642	19.9133	19.8371	20.1938	NaN	19.9122	20.2013	3	3	3	11.5	416	44144.2
CG14088	CG14088	-0.949719	0.59695	NaN	NaN	NaN	NaN	NaN	NaN	NaN	NaN	1	1	1	4.5	289	32032.5
Aats-lys	Lysine--tRNA ligase	-0.951518	0.753977	19.8052	19.6889	19.7893	19.6339	21.0314	19.2673	21.4983	20.3509	7	7	7	15.9	590.5	66582.3
Hop	Hsp70/Hsp90 organizing protein homolog	-0.954517	3.15012	23.6644	23.5781	23.3564	23.1687	23.5785	23.35	23.2073	23.3521	15	15	15	36.7	490	55698.1
CG7845	CG7845	-0.955394	0.45958	NaN	19.3882	19.3424	19.3476	NaN	19.3603	19.3143	18.9269	3	3	3	10	419	46674.3
bin3	Bicoid-interacting protein 3, isoform B;Probable RNA methyltransferase bin3	-0.956377	1.49124	23.4507	24.3242	24.8783	24.828	23.4002	23.6685	23.1657	22.9532	9	9	9	9.4	1367	146234
CG1737;CG1737-RA	CG1737, isoform C;CG1737, isoform A	-0.956468	3.95573	23.0145	23.309	23.0154	23.5317	22.3592	22.2288	22.266	22.0801	18	18	18	23.5	933.5	101100
Cpr72Ec	Cuticular protein 72Ec	-0.958151	0.373259	20.8165	17.9916	19.2968	20.1028	NaN	NaN	NaN	17.7554	3	3	3	6.8	429	50566
CG9752	CG9752	-0.958492	1.10826	NaN	17.2377	NaN	16.8808	18.2648	16.5423	NaN	NaN	1	1	1	3.2	343	39545.2
CG17259	CG17259, isoform A	-0.960953	2.5245	20.299	19.9411	19.6808	20.1615	20.3474	20.5315	20.5717	19.7202	3	3	3	6.8	501	56455.6
mRpL21	Mitochondrial ribosomal protein L21, isoform A	-0.96376	1.18312	NaN	17.7658	17.8565	17.3301	18.2268	18.0596	19.1716	17.9136	1	1	1	10.4	201	22613.4
ncm	Pre-mRNA-splicing factor CWC22 homolog	-0.96422	3.44865	27.9197	28.9594	29.1292	29.4344	27.8018	27.8393	27.9478	28.0369	39	39	39	26	1330	151637
dalao	DALAO protein	-0.965942	3.19	24.8449	25.1663	25.308	25.7066	24.9709	24.886	24.5546	24.4837	17	17	17	26.8	749	78672.1
Mapmodulin;Anp32a	Mapmodulin, isoform B;Mapmodulin, isoform D;Acidic leucine-rich nuclear phosphoprotein 32 family member A	-0.96643	2.11131	21.7371	20.9446	20.3405	20.5362	20.649	19.9575	20.1806	20.1612	4	4	4	19.5	312	34959.6
yip2	HL08109p	-0.971685	3.11387	25.597	24.9652	24.8523	24.7024	25.3979	25.3787	25.2911	24.7847	17	17	17	47.7	398	41610
Ef1gamma	Elongation factor 1-gamma	-0.973065	3.73599	24.7327	24.3701	24.6364	24.4348	24.9212	25.1256	25.3658	25.0362	22	22	22	46.2	431	48967.6
CG9641	CG9641, isoform B;CG9641, isoform A	-0.973361	2.55455	21.2261	21.083	21.5686	21.8955	20.9091	20.759	21.0959	20.6525	7	7	7	14.4	489	55194.7
Gie	ADP-ribosylation factor-like protein 8	-0.975606	0.289296	NaN	NaN	18.653	18.7868	NaN	NaN	19.7343	NaN	1	1	1	7.5	186	21253.7
Glycogenin	Glycogenin, isoform A	-0.975677	2.17642	25.1411	22.8212	22.8244	22.2206	23.4217	23.3314	23.2587	22.8542	19	19	19	52.3	436	49215.7
E(bx)	Enhancer of bithorax, isoform G;Enhancer of bithorax, isoform I;Enhancer of bithorax, isoform E;Enhancer of bithorax, isoform H;Nucleosome-remodeling factor subunit NURF301;Enhancer of bithorax, isoform F	-0.976385	2.72894	22.841	23.0468	23.2329	23.1039	22.5732	21.8295	21.9556	21.918	21	21	21	15.1	2649	298508
CG18178	CG18178, isoform A	-0.977904	2.48627	20.2179	18.6369	20.8454	20.861	20.2225	20.4633	20.8221	20.4619	5	5	5	16.3	374	42515
CG8801	Probable nucleolar GTP-binding protein 1	-0.98141	1.10403	18.9492	19.1493	21.0186	20.4854	18.7945	18.7739	18.4369	20.3147	6	6	6	11.3	652	75351.4
CG11334	Methylthioribose-1-phosphate isomerase	-0.982035	1.20265	20.9003	20.7677	20.8661	20.6038	20.7094	21.6196	21.3604	20.5628	4	4	4	14.6	364	39108.1
Eaf6	Eaf6	-0.991185	1.251	19.0628	19.9952	19.9471	20.4471	NaN	NaN	NaN	18.9829	2	2	2	9.3	225	24399.8
OstDelta	CG6370	-0.999447	2.69599	20.2225	21.4535	21.5175	20.9477	22.2168	22.1486	21.9682	22.0761	14	14	14	30.1	634	69229.9
EG:BACR7A4.14	CG3699	-1.00126	1.52591	19.0204	18.0669	17.5888	17.9823	18.4266	19.5376	19.5107	18.2328	1	1	1	6	251	26063.1
tra2	Transformer-2 sex-determining protein	-1.00251	1.15375	NaN	NaN	17.9952	NaN	NaN	NaN	NaN	NaN	1	1	1	6.1	226	26891.8
MEP-1	MEP-1, isoform A	-1.00667	2.70968	21.7774	21.5734	21.6609	21.5076	20.9163	21.1967	21.3023	21.2582	9	9	9	14.3	1152	124065
Cpsf73	Cleavage and polyadenylation specificity factor 73	-1.01088	0.473005	19.0951	20.4894	20.2581	19.8075	19.3905	NaN	19.8995	19.1826	5	5	5	8.3	684	76825.5
Cpr31A	Cuticular protein 31A	-1.01214	0.250269	26.0012	20.7698	20.4569	19.3072	19.3948	18.8854	22.8646	17.7221	9	9	9	38.5	340	35506.8
CG9444	CG9444	-1.02465	0.908456	NaN	NaN	16.4261	NaN	NaN	NaN	NaN	NaN	1	1	1	2.7	557	63076.9
RpL5	Ribosomal protein L5, isoform G;60S ribosomal protein L5	-1.03176	4.47481	26.2626	25.8542	25.9411	25.6423	26.177	26.156	26.0955	25.782	13	13	13	31.4	299	34036.9
Prosbeta4	Proteasome subunit beta type	-1.03331	1.71962	18.4024	18.1595	17.9475	16.9121	19.4888	18.5221	19.0964	18.0307	1	1	1	7.5	201	22481.6
Rala	RAL2;Ras-related protein Ral-a	-1.03556	0.877994	19.7395	19.5216	19.8372	20.7744	19.1407	20.0375	19.2166	NaN	2	2	2	13.2	199	22687.3
CG9705	CG9705, isoform C;Cold shock domain-containing protein CG9705	-1.03716	1.91789	NaN	18.6449	18.9734	19.2874	19.2186	19.0811	19.0516	18.3331	1	1	1	8.4	143	15778.9
CG33235	CG33235	-1.03751	1.37903	21.8493	21.0973	21.7799	20.9631	19.5854	19.9398	20.7226	19.6224	3	3	3	18.9	1584	174342
CG5554	CG5554	-1.03962	2.55468	20.2905	21.6124	22.1415	22.2284	22.5583	21.8862	21.6398	21.7995	5	5	5	17.6	323	36344.3
Nopp140	Nopp140, isoform E	-1.04046	3.42691	28.5686	29.4074	29.5616	29.5533	28.5913	28.5512	28.9472	28.8993	24	24	0	25.5	773	78191.8
smt3	LD07775p	-1.0408	2.52036	23.9196	23.3986	23.6568	23.3526	22.9405	22.1261	22.6243	22.5298	5	5	5	48.9	90	10124.4
Hakai	Hakai, isoform A;Hakai, isoform C;Hakai, isoform E;Hakai, isoform F	-1.04503	2.12845	20.663	22.5428	22.8523	23.1604	20.3239	21.0053	20.8533	21.0341	6	6	6	26.5	387.5	40909.9
skpA	HL01263p	-1.04573	0.318701	NaN	18.6068	19.7134	19.9224	NaN	NaN	NaN	19.392	1	1	1	10.5	162	18597
sno	Protein strawberry notch	-1.0474	0.391115	NaN	19.2416	19.0311	19.2588	NaN	19.1813	NaN	19.7145	4	4	4	3.9	1653	180376
alt	Aluminum tubes, isoform A;Aluminum tubes, isoform G	-1.05052	3.63706	24.9582	24.8851	24.8064	24.936	24.7297	24.9763	24.8085	24.8117	26	26	26	39.9	858	96843.8
CG4622	Zinc finger CCHC domain-containing protein 8 homolog	-1.05533	1.56752	19.0818	19.747	20.0328	19.9742	19.3572	19.1029	18.4643	NaN	3	3	3	6.5	553	62405.1
CSN4	COP9 complex homolog subunit 4, isoform B;COP9 signalosome complex subunit 4	-1.0569	0.376433	NaN	18.919	NaN	18.7956	NaN	NaN	NaN	19.5543	1	1	1	3.9	407	46473.2
alpha-Est2	Alpha-Esterase-2	-1.06401	0.591253	17.5225	17.5411	17.5198	17.1938	NaN	NaN	17.5629	NaN	3	3	3	6.2	566	64664
CG5590	CG5590	-1.06453	4.46736	24.349	24.1443	23.9895	23.5485	24.1048	24.2198	24.0951	23.8715	13	13	13	34.2	412	44354.1
Hsp27	Heat shock protein 27, isoform B;Heat shock protein 27	-1.06714	3.03945	28.8356	28.7507	28.8318	29.1481	29.1463	28.7285	28.4833	28.4681	21	21	21	88.7	213	23616.6
Hpr1	Hpr1	-1.0689	2.36975	21.0419	22.0783	22.3466	22.0354	20.6242	21.0878	21.162	20.1831	6	6	6	9.4	701	80760.3
CG9629	CG9629	-1.06958	3.37897	22.0871	22.2555	22.2835	22.6477	22.7359	22.6925	23.0417	23.12	7	7	7	21.5	540	58314.1
alpha-Est7	Alpha-Esterase-7, isoform A;Alpha-Esterase-7, isoform B	-1.07488	0.65426	20.55	20.9284	20.6018	20.0812	20.1648	20.5512	22.3042	21.5325	7	7	7	18.4	484.5	55819.3
CG3198	CG3198	-1.07547	1.96843	20.5389	19.0289	20.5257	19.1753	18.2769	17.8562	18.094	17.4155	2	2	2	6.8	438	49833.8
wde	BcDNA.LD26050	-1.08339	3.04363	18.1389	18.8941	18.7675	20.1987	18.0193	18.201	18.1719	18.7944	4	4	4	3.6	1420	156798
CycT	Cyclin T, isoform D;Cyclin T, isoform C;Cyclin-T	-1.08611	4.96263	25.7383	27.077	27.6912	27.6811	26.5277	26.2877	26.452	26.3273	27	27	27	42.4	990.5	106430
CG4266	CG4266, isoform A;CG4266, isoform B	-1.08775	3.60922	21.2194	22.7121	22.5244	22.7241	21.1392	21.0675	21.3255	21.0109	10	10	10	13.4	1260.5	135592
mri	Mrityu, isoform E;AT10158p	-1.09111	0.597444	NaN	NaN	NaN	18.0768	NaN	NaN	NaN	NaN	1	1	1	3.7	438.5	48143.7
CG11505	La-related protein CG11505	-1.09126	2.94318	18.3453	NaN	18.6848	18.4406	18.421	18.228	18.0374	18.6478	2	2	2	2.8	1526	161382
Slu7	Pre-mRNA-splicing factor Slu7	-1.09141	2.56133	26.0207	27.6372	27.8011	28.0006	26.9721	26.5792	26.6705	26.9354	27	27	27	52.1	574	65977.5
CG2150	CG2150	-1.09216	2.26902	22.1456	20.7993	21.5066	21.0765	20.2321	20.3093	20.9618	19.8925	2	2	2	10.1	188	17476.8
CG32955;CG33695	CG33695, isoform C;CG33695, isoform D;CG33695, isoform F;CG33695, isoform E	-1.0962	3.09737	20.0413	19.7844	19.9816	19.3239	18.9332	18.3829	18.5947	18.9702	2	2	2	12.9	277	29375.5
CG41099	CG41099, isoform B;CG41099, isoform D;CG41099, isoform C	-1.09672	0.796366	NaN	19.4141	19.2838	19.1748	NaN	NaN	NaN	19.806	2	2	2	2.3	1122	124296
lap	Like-AP180, isoform C;Like-AP180, isoform D;Phosphatidylinositol-binding clathrin assembly protein LAP	-1.09881	1.17201	18.4139	20.2329	21.4175	20.0564	20.5749	20.1387	20.5798	19.5573	5	5	5	9	758	80898.2
TfIIFalpha	General transcription factor IIF subunit 1	-1.10182	2.4201	19.2785	20.6875	21.0686	21.2131	21.0485	20.2485	21.1279	21.1113	8	8	8	24.4	577	64466.5
bol	Boule, isoform E;Boule, isoform C;Boule, isoform D;Boule, isoform F;Protein boule	-1.1042	2.24088	20.9035	21.5745	20.1544	21.1272	19.9117	19.9402	20.106	20.1662	3	3	3	51.6	227.5	24588.9
l(3)psg2	Lethal (3) persistent salivary gland 2	-1.10568	2.10695	22.0835	24.2107	24.5208	24.6609	22.1579	22.8175	22.5361	23.0424	11	11	11	7.4	1929	215362
CG10600	CG10600, isoform C;CG10600, isoform A;CG10600, isoform B	-1.10724	3.31077	21.6105	23.425	22.4601	22.3238	20.6379	20.5537	20.1277	20.2314	6	6	6	6.8	1377	150553
Adh	Alcohol dehydrogenase	-1.10892	3.26669	26.8864	26.3179	26.1481	25.788	26.3642	26.9193	26.837	27.0017	14	14	14	67.2	256	27761.1
fabp	CG6783, isoform B;CG6783, isoform C;CG6783, isoform A	-1.10977	2.39329	24.2692	23.7412	23.9253	22.6462	23.3272	24.111	23.8771	23.374	10	10	10	64.6	130	14502.5
mip120	Myb-interacting protein 120, isoform B;Protein lin-54 homolog	-1.11185	1.74154	19.5481	21.0928	19.251	19.5522	18.8884	18.8331	18.6294	18.7211	4	4	4	6.2	950	100022
CG4538-RA;CG4538	CG4538, isoform A;CG4538, isoform B	-1.11236	1.09414	NaN	NaN	19.0042	18.8829	18.6904	18.2935	NaN	NaN	2	2	2	3.3	673	71330.1
mRpL24	Probable 39S ribosomal protein L24, mitochondrial	-1.11399	1.77038	19.0172	18.2267	18.9515	18.7577	19.147	19.0916	18.9705	19.5096	2	2	2	16.2	247	29216.4
Vps13	Vacuolar protein sorting 13	-1.12033	0.456285	21.2106	NaN	NaN	19.409	20.1554	NaN	19.8703	19.681	6	6	6	1.9	3321	374545
CG1890	CG1890	-1.12056	1.20336	20.3823	19.3193	20.1834	21.5042	20.5614	21.0728	20.5821	20.039	2	2	2	25.5	110	12942.9
mRpS30	GH05406p	-1.12306	0.837329	NaN	16.6881	16.6718	16.8123	NaN	NaN	NaN	17.3912	1	1	1	2.2	557	65107.1
MED8	Mediator of RNA polymerase II transcription subunit 8	-1.12448	2.87755	21.1458	22.1353	21.781	22.0513	21.5834	21.2346	21.93	21.6944	4	4	4	18.7	252	27948.3
Jupiter	Microtubule-associated protein Jupiter	-1.12775	3.90417	25.1211	24.7991	24.7184	24.4296	24.1841	24.0284	23.9062	24.0847	12	12	12	74.1	197	20943.2
SMC1	Structural maintenance of chromosomes protein	-1.13505	2.42723	18.8333	19.4034	19.2249	20.3431	18.8988	18.8997	18.7746	18.9111	5	5	5	4.6	1238	142881
Pgd	6-phosphogluconate dehydrogenase, decarboxylating	-1.13866	1.87808	21.5643	21.4836	21.9734	21.8997	21.932	22.1935	22.7552	21.3478	6	6	6	13.9	481	52491.1
ced-6	Ced-6, isoform B;PTB domain-containing adapter protein ced-6	-1.13948	0.620114	NaN	NaN	18.0088	NaN	NaN	18.6305	19.3983	NaN	1	1	1	2.3	517	56140.4
CG7379	CG7379	-1.14121	1.12235	19.4571	19.3832	20.1778	18.7552	18.2422	NaN	18.4668	18.337	3	3	3	8.1	433	45719.1
CG15093	Probable 3-hydroxyisobutyrate dehydrogenase, mitochondrial	-1.14403	2.05149	22.0358	21.6903	22.2226	22.1627	21.6358	22.4092	22.4881	23.0196	4	4	4	22.8	275.5	29128
CG13887	CG13887, isoform B	-1.14575	1.5228	22.3148	21.2537	21.019	20.347	21.4759	22.0863	21.5201	20.423	10	10	10	27.2	228	26154.4
Aldh-III	Aldehyde dehydrogenase;Aldehyde dehydrogenase type III, isoform O;Aldehyde dehydrogenase type III, isoform N	-1.14669	3.09114	21.3433	19.6335	19.8228	19.8216	20.9198	20.7693	21.193	20.4339	5	5	5	9.1	530.5	59298.7
Msp300	Muscle-specific protein 300 kDa, isoform M;Muscle-specific protein 300 kDa, isoform G	-1.14964	0.497536	NaN	NaN	NaN	NaN	NaN	NaN	NaN	19.9095	6	5	1	1.1	10112.5	1128430
TwdlBeta	TwdlBeta	-1.15433	0.537085	18.9993	NaN	NaN	NaN	NaN	NaN	NaN	NaN	2	2	2	17.7	198	21597
MED1	Mediator of RNA polymerase II transcription subunit 1;FI18115p1;Mediator complex subunit 1, isoform C	-1.15482	3.02987	21.7628	21.9823	22.7443	22.3976	22.3016	22.0859	21.6835	21.7396	14	14	14	16.6	1141	116802
vir	Protein virilizer	-1.16444	0.905556	21.7752	22.945	23.4174	23.1487	22.2162	22.0583	19.8859	20.3913	10	10	10	6.3	1854	209002
cype	Cyclope, isoform A	-1.16449	1.64228	20.4986	19.5192	19.2346	19.1808	20.2596	20.2648	21.6747	20.2618	2	2	2	29.9	77	8295.59
CG12909	CG12909	-1.16638	0.629572	NaN	NaN	16.128	NaN	NaN	NaN	NaN	NaN	1	1	1	4.6	281	32108.8
CG14062	CG14062	-1.16774	0.83711	18.836	NaN	17.9414	NaN	NaN	NaN	NaN	NaN	1	1	1	3.5	346	38716.5
MED14	Mediator of RNA polymerase II transcription subunit 14;RNA polymerase II transcription subunit 14	-1.1711	3.20695	21.4494	22.238	22.4964	22.7878	22.062	21.9012	22.6289	22.2305	10	10	10	8.6	1442	159779
Dek	Dek, isoform A;Dek, isoform C;Dek, isoform B;DEK protein	-1.17269	1.81202	22.4363	22.3417	22.2475	21.9332	21.3189	22.7915	22.6009	21.9666	12	12	12	23.7	665	72123.6
Fpps	Farnesyl pyrophosphate synthase	-1.18104	3.76678	19.7897	20.084	20.3674	20.1994	20.0706	20.5476	20.2293	20.2908	3	3	3	9.1	419	47903.1
skd	Skuld, isoform F;Skuld, isoform E;Mediator of RNA polymerase II transcription subunit 13	-1.18389	1.85084	NaN	19.9213	19.8266	19.6128	19.1962	19.2162	19.2903	19.1114	3	3	3	2.3	2618	280024
RhoGDI	LD16419p	-1.18478	0.745612	19.6997	18.353	NaN	NaN	NaN	NaN	NaN	NaN	1	1	1	6.5	201	23218.3
Aats-tyr	LD21116p	-1.1871	2.50485	19.3883	NaN	NaN	19.202	19.7551	19.3361	19.5582	19.3997	4	4	4	11.4	525	58159.1
y	Protein yellow	-1.18847	0.757486	20.0616	18.226	18.817	22.7021	19.1222	18.9233	18.6267	NaN	5	5	4	13.5	541	60519.7
MED24	Mediator of RNA polymerase II transcription subunit 24	-1.18889	1.44409	16.9854	19.6338	18.6898	19.1129	18.006	18.1408	18.9364	18.9301	1	1	1	0.9	993	111743
Vha100-2	Vha100-2, isoform A	-1.18902	1.33294	NaN	NaN	17.8968	18.3592	NaN	NaN	NaN	18.5509	3	3	3	2.6	834	94848.9
kis	Kismet, isoform C;Kismet, isoform F;Kismet, isoform E;KISMET-L long isoform;Kismet, isoform D;Kismet, isoform B	-1.20011	1.95975	22.7708	23.439	22.9817	23.1798	21.9695	21.4887	21.6677	21.0315	20	20	20	5.3	5287	569861
Chro	Chromator, isoform A	-1.20019	3.72505	24.1373	24.4542	24.472	24.3966	23.1634	23.0886	23.2171	23.4486	24	24	24	35.7	926	101053
vig	LD07162p	-1.20073	1.70598	NaN	NaN	NaN	17.3215	NaN	NaN	NaN	NaN	2	2	2	7.1	490	52708.4
Mhcl	Myosin heavy chain-like, isoform A;Myosin heavy chain-like, isoform G;Myosin heavy chain-like, isoform B;GH16009p;Myosin heavy chain-like, isoform F;Myosin heavy chain-like, isoform D	-1.20282	0.609439	20.5207	21.2178	20.2161	19.9904	19.8892	NaN	19.5983	20.2129	6	6	6	3.5	2035.5	227860
Gtp-bp	Signal recognition particle receptor subunit alpha homolog	-1.21061	0.549926	NaN	18.0708	NaN	NaN	NaN	NaN	NaN	17.9791	2	2	2	3.4	614	67795.1
CG18003;CG18003-RC	CG18003, isoform B;CG18003, isoform A	-1.21271	2.49594	21.7271	21.9518	21.4956	21.7567	20.919	21.6438	21.956	21.3812	7	7	7	23.2	383	41467.4
Sec23	Sec23, isoform A	-1.21467	1.02561	20.8309	19.8851	20.4202	20.6096	19.7566	20.8911	21.2929	20.3654	3	3	3	4.8	773	86802.2
l(1)G0020	Lethal (1) G0020, isoform B;Polycomb protein l(1)G0020	-1.2157	1.41622	NaN	NaN	NaN	18.3343	NaN	NaN	NaN	17.8831	1	1	1	1.2	987.5	110639
Neb-cGP	Neb-cGP, isoform A	-1.21832	3.7519	20.4921	20.9016	20.9443	20.1702	20.9481	20.8774	21.0903	21.1265	2	2	2	45.8	48	5087.09
CG1665-RA	CG1665	-1.2209	2.6109	19.3422	18.7549	18.8267	18.5188	19.3445	19.2984	19.1881	19.1878	5	5	5	17.4	340	38163
woc	Without children, isoform A;Without children, isoform B	-1.22183	3.23265	21.9403	22.3699	22.4449	22.0523	21.601	21.3341	21.3726	21.2059	13	13	13	10.1	1695.5	188066
su(r)	Dihydropyrimidine dehydrogenase	-1.22194	1.48729	17.8417	18.1765	18.0203	17.6742	18.0637	18.9932	18.8661	18.2951	2	2	2	2.5	1031	111226
Sec22	EG:34F3.8 protein;Sec22 ortholog, isoform B	-1.22319	1.22878	20.0526	20.9357	21.3562	20.4142	19.8369	21.9733	20.494	21.8349	6	6	6	35.5	212	24744
CG17271;CG17271-RB	CG17271, isoform A;CG17271, isoform B	-1.22385	2.39787	21.086	19.4066	18.6182	17.744	18.7736	19.0704	18.9768	18.5511	3	3	3	13.5	275.5	31664
CG9306	AT12494p	-1.22674	2.0766	NaN	17.917	18.2343	18.8423	18.7626	18.1382	18.5879	18.0403	4	4	4	29.9	144	17384.8
polybromo	Polybromo	-1.22705	4.81646	24.1105	25.17	25.1715	25.282	24.152	23.9377	24.2289	24.0046	34	34	34	24.6	1654	189694
Fmo-2	Flavin-containing monooxygenase 2	-1.2277	0.831699	NaN	NaN	NaN	16.6759	NaN	NaN	NaN	18.0798	1	1	1	4.2	429	49207
CG32230	CG32230, isoform A	-1.22968	2.24157	21.6243	20.5039	21.3403	20.515	21.2348	21.2553	20.4273	21.5429	4	4	4	37.3	83	9433.75
CG17127	CG17127, isoform A	-1.23022	0.828058	22.8368	21.0048	20.544	20.6639	20.5678	NaN	20.3646	20.8518	3	3	3	51	98	10762.2
RpL35	FI02809p	-1.2459	2.21777	25.1907	25.8215	25.7469	25.6811	25.3739	25.139	25.5412	25.3106	5	5	5	30.1	123	14449.5
CG7518	CG7518, isoform C;CG7518, isoform D;CG7518, isoform E	-1.24761	2.02762	21.0366	20.139	19.9526	20.9341	20.3408	19.8959	19.6541	19.5167	5	5	5	2.8	2351	257566
CG6118	CG6118, isoform B;CG6118, isoform C	-1.24773	3.42256	21.2054	21.2445	21.4613	21.5849	20.6989	20.6158	20.5818	20.3213	6	6	6	7	925	104409
RpS29	40S ribosomal protein S29	-1.26282	2.09026	23.3291	23.6648	24.4136	24.7435	23.4496	23.098	22.8771	23.2285	4	4	4	50	56	6590.63
CG7182	CG7182, isoform A	-1.26396	0.753781	18.5348	18.482	NaN	19.6944	18.475	19.4927	NaN	19.0037	3	3	3	6.4	513	56818.6
Obp99b	General odorant-binding protein 99b	-1.26698	2.43236	24.6772	23.2613	23.409	22.8537	24.174	24.0451	23.4081	23.1472	8	8	8	70.5	149	17188.5
ear	ENL/AF9-related	-1.26766	2.87578	21.1663	23.3027	23.2342	23.2099	23.2121	22.7052	23.2787	23.1373	11	11	11	18.4	931	100231
CG15293	CG15293, isoform A	-1.26785	0.700214	NaN	18.6924	17.8326	18.1602	17.92	NaN	NaN	NaN	2	2	2	9.3	333	36698.1
Lsd-2	Lipid storage droplets surface-binding protein 2;Lipid storage droplets surface-binding protein;Lipid storage droplet-2, isoform E	-1.26794	2.10424	21.4782	21.2215	21.3375	22.264	21.2435	20.34	21.0509	21.762	10	10	10	31.2	335	36895.7
CG11586-RA	CG11586, isoform A	-1.27175	0.544015	NaN	18.9725	19.8835	19.6405	NaN	NaN	NaN	NaN	1	1	1	7.7	194	22937.9
CG1240	CG1240	-1.2738	2.37903	24.2658	24.3083	24.4247	24.6816	22.9551	23.873	23.6521	24.2122	7	7	7	25.4	244	27492.9
Gpo-1	GH10595p	-1.27413	0.973799	18.4031	18.267	18.4316	NaN	18.866	18.0693	18.2416	17.1425	3	3	3	6.8	724	80422.2
GstD7	Glutathione S-transferase D7	-1.27962	1.7136	NaN	18.7294	19.0386	19.2206	19.4351	18.7654	19.6129	19.4888	4	4	3	22.3	224	25419.2
Cpsf100	Probable cleavage and polyadenylation specificity factor subunit 2	-1.2821	2.55656	22.9715	24.4404	24.3595	24.7956	22.3217	22.6156	23.1697	23.2967	15	15	15	33.3	710	80264.8
IntS12	CG5491	-1.30204	2.18799	NaN	19.3742	19.2908	19.7308	19.1588	17.875	18.4643	18.5166	2	2	2	7.6	328	34333.5
futsch	Futsch, isoform F;Microtubule-associated protein futsch	-1.30552	0.96481	20.209	22.6738	19.9445	21.4108	19.0867	19.1467	19.1212	18.5485	8	8	8	1.9	5495	592078
Snx6	LD22082p;Sorting nexin 6, isoform B	-1.30657	0.816845	18.4447	NaN	18.4699	18.6751	18.6595	NaN	NaN	NaN	2	2	2	4.5	452	50476.4
Eaat1	Excitatory amino acid transporter 1, isoform A	-1.30757	1.28138	17.2361	17.2157	NaN	NaN	17.6905	NaN	17.6595	NaN	1	1	1	2.3	479	52359.5
B52	Serine-arginine protein 55	-1.31078	3.65033	30.1422	31.1647	31.8091	32.3587	31.0774	30.6311	31.2057	31.147	26	26	2	44.1	352.5	40081.4
Tbp	TATA-box-binding protein	-1.31383	0.306885	20.4627	22.4278	22.9835	22.7178	NaN	22.6771	23.3535	22.3334	3	3	3	5.1	353	38451.3
Eip55E	Eip55E	-1.32213	1.72408	NaN	NaN	NaN	NaN	NaN	NaN	NaN	18.2271	2	2	2	5.1	393	42988.3
Set1	Histone-lysine N-methyltransferase SETD1	-1.32837	3.55768	22.2681	23.2123	23.3038	23.2555	21.4403	21.9388	21.4929	22.0786	17	17	17	12.9	1641	188383
Cbp80	Cap binding protein 80, isoform B;Nuclear cap-binding protein subunit 1	-1.32915	1.49962	21.6802	21.9941	22.3824	23.2428	20.502	20.1609	21.1589	21.8688	6	6	6	9.5	800	93227.1
CG7675	CG7675, isoform A;CG7675, isoform B	-1.33706	2.61059	19.3416	18.7442	19.5578	18.1899	19.6942	20.5212	20.145	19.4078	4	4	4	17.4	311.5	34273.6
U2A	Probable U2 small nuclear ribonucleoprotein A'	-1.34465	1.02724	20.7056	20.1253	20.2644	20.7595	20.2075	NaN	19.3132	19.452	3	3	3	10.6	265	29744.1
sm	Smooth protein;RE74969p	-1.35092	2.35559	24.763	24.3417	24.2516	23.8166	23.0414	22.9907	22.311	22.68	7	7	2	20.4	477.5	52184.6
RpL29	60S ribosomal protein L29	-1.358	2.24994	22.6279	21.8159	22.2291	21.8758	21.6631	21.6849	20.6461	20.6077	2	2	2	14.5	76	8920.3
Sin3A	LD13852p;Sin3A, isoform D;Sin3A, isoform A	-1.36673	2.58093	22.69	23.3065	23.1618	23.3359	21.5314	22.3606	21.426	21.8685	19	19	19	14.5	1776	189973
ph-p;ph-d	LD01444p;EG:BACN25G24.3 protein (Fbgn0004860;ph-d protein);Polyhomeotic distal, isoform A;Polyhomeotic-proximal chromatin protein	-1.37382	0.811951	NaN	20.9164	17.9925	18.2506	NaN	NaN	NaN	NaN	2	2	2	2.8	1448	152565
MED26	Mediator of RNA polymerase II transcription subunit 26	-1.37786	3.28283	20.2201	20.0332	20.9195	21.0907	19.7273	19.8274	20.0024	20.5083	6	6	6	5.1	1483	165516
CG1530	CG42593, isoform C;CG42593, isoform A;CG42593, isoform B	-1.3789	1.27625	NaN	17.9667	17.6518	18.2472	NaN	NaN	NaN	17.7946	2	2	2	1.7	2219	247095
BicC	Bicaudal C, isoform B;Protein bicaudal C	-1.38303	0.296245	21.552	22.3281	22.6383	23.7231	NaN	NaN	NaN	21.668	3	3	3	4.1	905	97848.8
Idh	Isocitrate dehydrogenase [NADP]	-1.39102	3.34626	24.0501	23.4454	23.0901	22.5513	23.2741	23.7552	23.9229	23.4433	10	10	10	26.9	450	50431.8
CG7997	CG7997, isoform A	-1.39477	1.71356	NaN	NaN	17.6525	17.2246	NaN	NaN	NaN	NaN	1	1	1	3.6	417	47403.8
simj	LD33361p;Simjang, isoform A;Simjang, isoform D;Simjang, isoform E	-1.4019	3.42654	21.9011	22.2155	22.4066	22.466	20.7697	21.1401	20.7722	20.7797	10	10	10	19.6	920	96181
dom	Domino, isoform D;Helicase domino;Domino, isoform F	-1.40546	1.4348	NaN	20.6863	21.0408	20.7025	20.3154	19.3433	18.9295	NaN	4	4	4	2	2840	311501
MED15	Mediator of RNA polymerase II transcription subunit 15	-1.41	2.10345	19.3261	19.8727	20.5219	20.8895	20.2065	19.3925	19.8663	18.6551	5	5	5	8.7	749	80525.9
RpL37a	Ribosomal protein L37;Probable 60S ribosomal protein L37-A	-1.41472	2.67855	23.5403	24.0604	24.4211	24.021	22.6565	23.1369	23.233	23.665	2	2	2	20.4	93	10643.4
grh	Protein grainyhead	-1.4155	1.87524	20.2625	22.2891	21.8373	21.705	20.3428	19.6022	18.7111	20.2375	9	9	9	12.2	1182.5	128470
caz	RNA-binding protein cabeza;Cabeza, isoform D	-1.41584	2.44539	21.9761	22.534	22.1846	23.1684	21.3901	21.0385	20.9873	21.562	7	7	7	22.1	377	36581.8
prod	Non-histone chromosomal protein Prod	-1.41602	3.41487	22.2795	21.8591	22.3561	22.5148	20.7509	21.0459	20.7912	21.1641	6	6	6	22.8	346	39428.1
CG6287	CG6287	-1.42003	4.49862	23.2499	22.3717	21.5313	21.1015	21.8595	22.1769	22.4478	22.1455	10	10	10	39.5	332	35234.8
Arpc1	Actin related complex p41 subunit	-1.42026	1.26726	20.1227	19.4011	19.1438	18.8421	19.5967	19.3517	19.1606	NaN	3	3	3	11.7	377	41601.1
holn1	CD2 antigen cytoplasmic tail-binding protein 2 homolog	-1.42383	1.39366	18.3324	18.8924	19.2617	19.0033	18.0746	18.5456	NaN	18.136	2	2	2	6.6	319	36837.7
SF1	LD36095p	-1.42479	1.36817	25.1022	25.8955	26.5575	26.6638	22.7031	24.6376	24.7098	24.9146	17	17	17	28.3	787	87374
CG9346	CG9346	-1.44317	0.957757	18.8371	20.6083	19.7682	20.0021	NaN	NaN	NaN	19.1108	3	3	3	5.1	957	108452
CG6422-RB;CG6422	CG6422, isoform B;CG6422, isoform C;CG6422, isoform A	-1.45896	1.92467	19.5065	18.4401	18.6534	NaN	17.7287	18.0186	18.3315	NaN	3	3	3	5.4	699	78916.3
spen	Split ends, isoform H;Split ends, isoform G;Split ends, isoform D;Split ends, isoform F;Protein split ends	-1.46266	4.01812	22.7972	23.6991	23.5491	24.157	22.1474	21.9439	22.3806	21.8318	26	26	26	5.9	5504	593458
Tret1-1	Facilitated trehalose transporter Tret1-1	-1.4739	2.11168	NaN	19.1712	18.3874	18.4118	19.4902	19.1222	19.4066	18.7201	3	3	3	3.7	673	74107.7
CG9331	CG9331, isoform B;CG9331, isoform A;CG9331, isoform C	-1.474	1.39473	19.0877	19.1752	19.6287	19.2712	19.6509	20.9642	19.6211	19.6187	4	4	4	18.4	364	39772.6
CG7229	CG7229	-1.47898	0.404597	NaN	20.3659	20.3187	21.1957	NaN	19.9212	NaN	19.4828	4	4	4	6.2	674	74640.9
Rtnl1	Reticulon-like protein	-1.49081	2.71009	19.018	18.7698	19.877	18.4781	19.323	18.8796	19.6001	18.8509	3	3	3	5.9	601	64691.3
CG3308	CG3308	-1.49091	0.974576	NaN	NaN	NaN	NaN	NaN	NaN	NaN	NaN	1	1	1	3.4	319	35979.5
CG2931	CG2931	-1.49239	0.898121	NaN	17.5909	18.7736	18.9926	17.8573	17.272	NaN	NaN	1	1	1	4	302	33644.4
CG15525-RA	CG15525	-1.493	1.61279	22.7236	24.8529	25.0068	25.3593	21.2454	23.0391	22.8379	23.3861	7	7	7	49.1	161	18282.6
CG12818	CG12818	-1.49471	0.785762	NaN	18.7866	18.2914	17.9569	NaN	NaN	NaN	18.451	3	3	3	9.4	288	33385.9
Dp	Transcription factor Dp	-1.49847	1.00008	17.7534	NaN	17.5381	17.5969	17.913	NaN	15.8085	NaN	2	2	2	6.6	443	49464.5
bic	Beta NAC homolog	-1.49929	3.50267	22.3168	21.6089	21.9802	22.6083	22.171	22.2504	22.067	21.5342	4	4	4	23.7	169	17738
MED25	Mediator of RNA polymerase II transcription subunit 25	-1.50253	1.15695	NaN	18.3056	NaN	NaN	NaN	NaN	NaN	NaN	1	1	1	4.4	863	96641.6
CG6259	CG6259, isoform B;Charged multivesicular body protein 5	-1.50266	0.488486	18.4635	20.1102	20.3847	19.8754	21.0977	NaN	NaN	18.7874	2	2	2	9.7	226	25151.1
upSET	UpSET, isoform A	-1.50721	2.71236	21.6514	24.0931	23.4291	24.342	21.6604	22.438	21.8753	22.3919	13	13	13	6.5	3146	336444
vir-1	GH02216p;Virus-induced RNA 1, isoform G;FI07211p	-1.51101	0.711252	NaN	21.161	21.2499	NaN	NaN	NaN	NaN	NaN	1	1	1	13.7	423	47644.6
Samuel	SAM-motif ubiquitously expressed punctatedly localized protein, isoform C;SAM-motif ubiquitously expressed punctatedly localized protein, isoform D;SAM-motif ubiquitously expressed punctatedly localized protein, isoform A	-1.51652	1.70868	NaN	18.0821	17.7593	17.8197	NaN	NaN	NaN	17.1023	1	1	1	3.5	846	85621
Dpy-30L1	Protein dpy-30 homolog	-1.52098	0.958085	22.2253	23.3072	23.3202	23.8074	20.9801	20.3316	21.2586	NaN	2	2	2	20.9	134	13794.2
Cdk9	Cyclin-dependent kinase 9	-1.52249	3.90425	22.4955	24.4658	24.4507	24.7247	22.0088	22.2181	22.6916	22.0639	11	10	10	31.4	404	46787
Fip1	Fip1	-1.52311	3.0072	20.8947	22.7472	23.1935	22.6318	22.1746	21.4078	22.0175	22.1552	6	6	6	10.3	701	78615.4
pps	Protein partner of snf	-1.52629	2.85359	19.1819	20.6059	19.9014	19.5865	18.6301	18.4143	18.536	18.7517	6	6	6	4.3	2016	222000
CG1943	CG1943, isoform A	-1.52783	3.11563	21.8766	21.853	22.0387	21.8728	21.6049	20.9594	20.8099	21.3933	4	4	4	49.2	118	12427.9
CG7322	CG7322, isoform A	-1.52907	1.09891	17.8342	18.0679	18.1497	NaN	NaN	18.2361	17.8823	17.94	2	2	2	12	242	25615.4
CoIV	Cytochrome c oxidase subunit IV, isoform A	-1.53295	6.58313	23.7274	23.5729	23.7512	23.6445	24.2738	24.15	24.2876	24.059	3	3	3	18.7	182	20519.6
Osi21	Osiris 21	-1.53648	1.62196	21.2336	20.7111	18.7893	19.686	20.0312	18.5694	20.171	18.2166	2	2	2	6.4	282	30360.7
CG7768	Peptidyl-prolyl cis-trans isomerase	-1.53919	0.772944	NaN	NaN	NaN	16.4675	NaN	NaN	NaN	NaN	3	2	2	22.6	164	17771.2
Sec24CD	LP05220p;Sec24CD ortholog, isoform C	-1.54103	0.750042	NaN	NaN	NaN	NaN	NaN	18.907	19.0952	NaN	2	2	2	2.6	1212	131456
Stim	FI18406p1;Stromal interaction molecule homolog	-1.56059	0.845779	19.9672	19.6973	19.7721	19.1881	20.89	20.0971	NaN	19.6974	4	4	4	8.4	565.5	64250.7
CG15187;CG31367	CG33097, isoform A;AT20168p	-1.56663	6.10627	23.5235	24.2677	24.7971	24.6593	22.7385	22.9369	22.9001	23.0422	17	17	17	31.2	716	79184.2
CG10166	Probable dolichol-phosphate mannosyltransferase	-1.56937	0.926312	NaN	NaN	NaN	NaN	NaN	18.1778	NaN	18.3387	2	2	2	10.4	241	27002.3
Prosbeta1	Proteasome subunit beta type	-1.57129	1.22831	NaN	NaN	18.7116	18.5036	NaN	18.6092	19.3102	NaN	1	1	1	4.5	224	24264
CG9143	CG9143	-1.58622	2.07985	21.3414	22.8505	23.4494	23.7621	21.8876	22.0896	21.5331	23.2821	16	16	16	24	813	91575.1
CG1751;Spase25	CG1751-PA;Signal peptidase complex subunit 2	-1.58625	1.11917	20.2754	18.577	19.2897	18.689	20.432	19.9597	20.6488	19.4793	5	5	5	24.6	199	22216.4
e(y)3	Enhancer of yellow 3, isoform B;Enhancer of yellow 3, isoform D;Enhancer of yellow 3, isoform C;Supporter of activation of yellow protein	-1.60522	4.9196	24.7099	25.4355	25.7002	25.7872	24.5342	24.5073	24.2411	24.316	34	34	34	21.1	2008.5	213007
ATPsyn-b	ATP synthase subunit b, mitochondrial	-1.60609	5.61108	20.7552	20.4228	21.0718	20.685	20.5593	20.4832	20.5143	20.604	4	4	4	18.5	243	27357.6
Ahcy13	Adenosylhomocysteinase at 13, isoform C;Adenosylhomocysteinase	-1.60801	3.49166	20.7647	19.6483	20.1555	19.4708	21.0047	20.7468	20.1964	20.5174	6	6	6	16.7	432	47366.5
MED7	Mediator of RNA polymerase II transcription subunit 7	-1.6083	2.35151	21.6224	22.7616	22.6668	22.3876	22.4558	21.2519	21.6327	21.8421	5	5	5	27.7	220	25707.3
qkr58E-3;CG4021;nsr	QKR58E-3;CG4021;CG3875	-1.61082	1.91668	NaN	NaN	NaN	17.9642	NaN	NaN	17.7069	18.0816	3	3	3	12.6	319	36979.3
fru	Fruitless, isoform N;Sex determination protein fruitless	-1.61731	1.92175	20.4926	19.9243	21.3476	20.9183	18.5634	17.7864	18.5859	18.4768	5	5	5	7.8	782.5	83466.2
CG1924;Cnx99A;Cnx14D	CG1924;Calnexin 99A, isoform A;Calnexin 14D;Calnexin 99A, isoform C	-1.61774	0.988739	NaN	NaN	NaN	19.2015	NaN	NaN	NaN	NaN	1	1	1	3.2	622	70326.7
lgs	Protein BCL9 homolog	-1.61928	1.63997	NaN	NaN	17.9554	18.0198	NaN	NaN	NaN	17.4312	1	1	1	1	1469	153759
CG5958-RA	CG5958	-1.62477	3.68257	26.1265	25.8112	25.9884	25.799	26.3148	26.8171	26.9319	26.3296	15	15	15	50	294	33935.6
CG12288	CG12288	-1.63144	0.558354	NaN	20.0859	20.5645	20.5341	NaN	NaN	NaN	20.4332	3	3	3	10.6	435	47952.8
CG5946;zetaCOP;CG5946-RB	CG5946, isoform E;CG5946, isoform A;CG5946, isoform C;CG5946, isoform B;CG5946, isoform D;CG5946, isoform G	-1.655	3.76141	NaN	NaN	NaN	NaN	NaN	NaN	NaN	NaN	1	1	1	6.5	314.5	35528.6
pain	Transient receptor potential cation channel protein painless	-1.65502	0.777789	NaN	NaN	17.8937	17.7431	NaN	NaN	NaN	NaN	2	2	2	2.6	913	103507
CG1309	CG1309	-1.65873	0.590379	NaN	NaN	17.1512	17.2995	NaN	NaN	NaN	17.852	1	1	1	4.4	524	58402.4
Smr	Smrter, isoform D;Smrter, isoform G	-1.66453	1.18827	18.3683	17.5739	17.8267	17.4383	18.0534	18.1599	17.5014	NaN	4	4	4	1.6	3604	379469
CG11180	CG11180	-1.66651	1.21552	19.4601	19.0012	NaN	19.0361	18.4063	18.7462	NaN	NaN	4	4	4	8.7	726	82630.1
miple2	FI07208p;Miple2, isoform E;Miple2, isoform D	-1.66933	3.18889	23.2565	23.968	24.1439	24.2957	23.5234	23.1679	23.6031	23.0984	8	8	8	35.1	281	30745.4
CG3192-RA	CG3192, isoform A	-1.67012	1.06641	19.3724	NaN	18.4115	NaN	19.3398	NaN	NaN	18.0211	4	4	4	20	175	20202.9
CG9798	Elongation of very long chain fatty acids protein	-1.67651	0.474423	NaN	NaN	18.4568	19.1934	NaN	NaN	NaN	20.1489	2	2	2	9	354	41165.9
Cul2	Cullin-2, isoform A	-1.67799	0.983454	NaN	18.7862	19.3955	18.6408	16.6151	NaN	19.1079	19.0047	2	2	2	3.1	753	87373.4
CG6227	CG6227	-1.67831	3.48476	21.6319	23.0799	23.6451	23.7456	21.0853	21.7297	22.0804	21.4757	13	13	13	12.6	1224	136281
CG34422	CG34422, isoform C;CG34422, isoform D	-1.6898	0.802473	19.6238	19.8492	19.4747	19.3209	NaN	19.9509	NaN	18.868	3	3	3	2.7	2175	226018
Pp1alpha-96A	Serine/threonine-protein phosphatase alpha-1 isoform	-1.69487	0.854667	NaN	NaN	20.5274	20.8088	NaN	19.63	NaN	19.8589	4	4	2	14.1	327	37370
Cp190	Centrosome-associated zinc finger protein CP190	-1.6952	2.39142	21.2198	21.2448	19.9536	21.0227	19.5124	19.7974	18.2895	19.0166	4	4	4	4.7	1096	121679
Rbm13	LD18882p	-1.69726	1.24227	NaN	19.2321	19.2223	18.9939	NaN	NaN	NaN	18.9834	2	2	2	5.8	343	40585.8
Arf79F	ADP ribosylation factor at 79F, isoform J;ADP-ribosylation factor 1	-1.69898	1.33726	NaN	18.1434	18.6156	17.6549	NaN	NaN	NaN	NaN	1	1	1	12.1	182	20687.8
CG5991	CG5991, isoform A	-1.70219	1.01532	18.1877	NaN	17.7953	17.834	18.4445	NaN	NaN	NaN	2	2	2	6.9	447	50488.7
east	Enhanced adult sensory threshold, isoform B;Enhanced adult sensory threshold, isoform G;EG:133E12.4 protein	-1.70494	3.81412	21.2622	22.3819	21.9054	22.3671	20.6892	20.2344	19.9286	20.443	12	12	12	7.6	2306	246197
CG5065	CG5065, isoform B;Putative fatty acyl-CoA reductase CG5065	-1.71717	1.42698	18.2084	17.2141	17.6706	18.9521	NaN	NaN	17.9155	NaN	1	1	1	3	625	69682.8
CG15055;CG42323-RC	CG42323, isoform E;CG42323, isoform C	-1.72077	0.550982	25.3076	24.4218	21.1083	26.1015	24.3838	20.0634	21.8241	21.746	3	3	3	35.1	205	20204.2
Nopp140	LD06749p	-1.72156	1.70999	24.551	25.8694	26.6227	26.2904	25.1263	24.4541	23.2815	24.7378	20	2	2	21.7	720	72205.3
Bap170	Brahma associated protein 170kD	-1.73024	4.32757	25.0854	25.8351	26.0115	26.0968	24.708	24.6263	24.5544	24.3371	31	31	31	26.4	1688	183029
Acsl	Lethal (2) 44DEa, isoform C;Lethal (2) 44DEa, isoform A;Lethal (2) 44DEa, isoform D	-1.73304	1.51337	20.0395	20.0721	20.4893	19.861	18.5814	20.8263	18.8269	20.8052	10	10	10	14	715	80378.1
CstF-64	Cleavage stimulation factor 64 kilodalton subunit	-1.74469	2.25324	23.0134	23.1512	23.4758	23.5123	21.9463	21.6553	21.912	20.2449	11	11	11	41.1	419	46185.1
CG7227	CG7227, isoform A	-1.75137	1.55516	18.3805	18.3823	18.8975	17.9206	18.2173	NaN	NaN	18.4191	2	2	2	6.8	518	59765.3
CG5174;CG5174-RA	CG5174, isoform H;CG5174, isoform M;CG5174, isoform A;CG5174, isoform L;CG5174, isoform B;CG5174, isoform G;CG5174, isoform J	-1.75191	0.796688	20.9918	20.8919	20.4919	20.2173	NaN	19.6048	19.7235	20.8884	4	4	4	36.7	202	21919.2
Osi22	Osiris 22	-1.7529	1.99953	22.9331	22.4742	22.6986	19.6096	21.3719	20.9842	19.6243	20.0898	3	3	3	8.7	332	37171.1
CG10576	CG10576, isoform A	-1.78005	3.14278	22.4817	20.5937	22.0383	21.132	22.3526	21.9859	22.2814	21.4349	12	12	12	27.4	391	42773.3
Rab18	GH11193p	-1.78208	0.926341	NaN	18.6443	19.0264	NaN	NaN	19.5484	NaN	NaN	3	3	3	16.2	197	22064
CG9536	CG9536, isoform A	-1.7859	1.32555	18.0251	17.5871	17.9892	17.9302	18.1693	NaN	NaN	18.175	1	1	1	3.1	450	49685.2
CG6089;CG33129	AT01533p;CG33129, isoform A	-1.78602	4.26673	21.8661	21.4407	21.7554	22.1689	20.9811	20.7129	21.5176	21.0725	7	7	7	10.5	457	50739.5
Rad23	Rad23, isoform B;DNA repair protein Rad23	-1.78808	0.500416	22.0912	21.2354	22.2796	21.9651	22.4975	22.3993	NaN	22.4608	4	4	4	20.4	378.5	41665
CG9812	CG9812, isoform B;CG9812, isoform C	-1.79691	0.690028	22.3327	21.6264	20.9744	20.3583	20.8058	20.5018	20.437	NaN	3	3	3	24.9	269	27394.2
Catsup	Protein catecholamines up	-1.79997	4.14429	19.4957	19.4437	19.7637	19.9226	20.034	19.4915	19.5483	19.719	2	2	2	2.9	449	48657.8
crp	Activator protein 4	-1.80065	2.61729	21.4694	21.7158	21.4742	22.4516	20.1539	19.7306	20.141	19.3458	7	7	7	18.9	631	67163.4
ttk	Protein tramtrack, beta isoform	-1.80253	5.22205	21.2134	22.2286	22.014	21.7916	19.9161	19.741	19.9955	20.0495	4	4	4	9.8	643	68770.5
elav	Embryonic lethal abnormal vision, isoform D;Protein elav	-1.80497	1.97567	17.9411	17.5197	17.0976	17.2218	17.3233	16.8184	17.3652	17.5641	1	1	1	2.5	483	50817.5
CG34455-RC	CG34455	-1.80575	2.04907	NaN	17.9796	NaN	17.6124	NaN	NaN	NaN	18.3671	2	2	2	6.6	304	33428.4
CG1703	CG1703, isoform A	-1.80903	2.87626	19.7097	19.1473	19.7541	20.2563	19.9105	19.3925	19.2596	19.605	6	6	6	10.1	901	101543
Ssadh	GH21316p	-1.82214	2.57422	NaN	NaN	18.1341	17.8549	NaN	NaN	NaN	NaN	3	3	3	6.1	509	54974
glob1	Globin 1, isoform A	-1.83487	1.22373	19.7341	18.3936	19.2129	18.3303	18.5978	19.031	18.8126	NaN	3	3	3	28.1	153	17088.4
wmd	HL01517p	-1.83774	1.02167	NaN	18.4124	18.8148	18.402	NaN	NaN	NaN	NaN	1	1	1	5.5	328	36073.4
Ref1	Aly	-1.85172	2.44724	26.4438	24.1251	22.9006	24.492	19.4698	19.2019	19.5038	20.7643	9	9	9	36.5	266	27851.6
Grasp65	Grasp65	-1.85951	0.794334	NaN	NaN	NaN	NaN	NaN	NaN	NaN	NaN	2	2	2	6.1	460	47723.6
RpS11	Ribosomal protein S11, isoform B	-1.87411	2.32408	NaN	21.2531	21.4086	21.6443	19.9549	19.3302	20.7965	20.7606	10	2	2	50	154	18102.2
MED19	Mediator complex subunit 19, isoform B;Mediator of RNA polymerase II transcription subunit 19	-1.87612	3.5445	22.2453	22.6917	23.1034	23.2812	22.7577	22.0491	22.4768	22.8813	3	3	3	10.7	337	35390.4
GS	AT02852p;CG32495, isoform D	-1.87774	4.3797	19.8872	19.7287	20.3684	20.4242	20.7903	20.6684	21.3803	20.9109	7	7	7	17.7	526.5	58237.4
CG1129	CG1129, isoform B;Mannose-1-phosphate guanyltransferase beta	-1.89132	1.22188	NaN	19.0329	18.5082	18.2372	NaN	NaN	NaN	18.8208	1	1	1	4.9	369	40448.1
Phk-3	MIP15436p	-1.89703	1.79313	NaN	NaN	19.7353	19.388	NaN	18.457	NaN	19.072	3	3	3	16.5	121	13514.6
Prx2540-2;Prx2540-1;CG12896-RA	Peroxiredoxin 2540;LD11278p;CG12896	-1.89856	1.45755	17.9357	18.4233	18.6152	18.6356	NaN	18.5583	NaN	18.761	3	3	3	19.1	220	24756.3
RAF2	LD37257p	-1.90677	4.62656	24.7174	25.3202	25.2561	25.4618	23.7872	23.3182	23.3898	23.4641	25	25	25	34.8	1117	125491
CG3209;CG3209-RA	CG3209, isoform B;CG3209, isoform C	-1.92389	1.23386	NaN	NaN	NaN	17.0135	NaN	NaN	NaN	18.2311	1	1	1	2.2	458.5	52089.3
Rcc1	Regulator of chromosome condensation	-1.92449	4.23557	18.1918	18.9028	18.3495	18.2213	18.0257	18.3481	18.0502	18.5714	2	2	2	3.8	547	58850.5
Bsg	Basigin, isoform G;Basigin, isoform A;Basigin, isoform J	-1.93012	1.29575	NaN	NaN	NaN	20.0364	NaN	NaN	NaN	NaN	2	2	2	4	266	29347.6
eEF1delta	Probable elongation factor 1-delta	-1.93198	2.90219	22.7275	22.5672	22.6093	22.9128	22.1726	22.4217	21.9066	23.1286	8	8	8	43.7	242.5	27389.4
wupA	Troponin I	-1.94283	1.36466	20.6685	NaN	NaN	18.7407	NaN	NaN	NaN	19.1385	13	1	0	39.9	208	24401.1
egl	Egalitarian	-1.96049	1.07152	18.9123	19.0758	18.2157	18.3016	NaN	18.3746	18.4806	18.6436	2	2	2	2.9	1004	112129
Sap130	Sin3A-associated protein 130, isoform F;Sin3A-associated protein 130, isoform G;Sin3A-associated protein 130, isoform A;Sin3A-associated protein 130, isoform B;Sin3A-associated protein 130, isoform C	-1.96855	1.98514	17.4675	19.5487	NaN	18.7288	NaN	16.6145	NaN	17.1492	1	1	1	1.1	1219	123621
RpS19b	40S ribosomal protein S19b	-1.97055	1.57105	NaN	NaN	18.5294	18.8067	NaN	NaN	18.4179	18.4141	2	2	2	13.5	155	17362.2
Cul5	Cullin-5	-1.97115	2.68641	NaN	NaN	NaN	16.6851	NaN	NaN	NaN	NaN	2	2	2	2.3	852	96929.6
RpS30	Ribosomal protein S30, isoform A	-1.97277	2.18914	24.6202	25.0068	24.7479	25.8203	24.1996	24.8115	24.2225	24.8634	2	2	2	8.3	132	14584.7
IntS1	CG3173	-1.97685	1.94405	NaN	NaN	19.0493	19.2488	NaN	NaN	NaN	18.1552	2	2	2	1.1	2053	235099
pgant5	Polypeptide N-acetylgalactosaminyltransferase 5	-1.99473	1.49129	NaN	NaN	18.4002	18.0764	NaN	NaN	NaN	18.3416	1	1	1	2.1	630	72155.9
[truncated: 106 more rows]

## Sheet: Figure_3_FiberLengths
Time point	32 h APF
Mef2-GAL4	wild type				Cka-IR-1				Cka-IR-2				Strip-IR
	data acquisition	pupae number	fiber length[µm]	av fiber length [µm]	data acquisition	pupae number	fiber length[µm]	av fiber length [µm]	data acquisition	pupae number	fiber length[µm]	av fiber length [µm]	data acquisition	pupae number	fiber length[µm]	av fiber length [µm]
	12.09.2019	1	202		29.08.2019	2	348		20.04.2020	1	255		12.09.2019	8	320
			245				323	336			305				320	320
			241		10.09.2019	5	391				332	297		6	299
			235	231			363	377		2	345				336
		2	199			3	383				309	327			299	311
			228				421		29.04.2020	1	404	404		2	332
			235				402	402	26.05.2020	1	330				311	322
			238	225		2	282				371	351	26.05.2020	1	432	432
	20.04.2020	2	216				284			4	335
			226				303	290			343
			213	218	29.04.2020	1	323				382	353
		3	267				322	323
			261			3	338
			255	261			350
	26.05.2020	1	240				318	335
			241	241
		6	234
			239
			243	239
Average fiber length [µm]				235.833				343.833				346.4				346.25
p value (Student's t test)								<0.001				<0.001				0.0017
P value summary								***				***				**
Descriptive statistics (Software: Graphpad)
Number of values				6				6				5				4
Minimum				218.0				290.0				297.0				311.0
25% Percentile				223.3				314.8				312.0				313.3
Median				235.0				335.5				351.0				321.0
75% Percentile				246.0				383.3				378.5				404.5
Maximum				261.0				402.0				404.0				432.0
Range				43.00				112.0				107.0				121.0
Mean				235.8				343.8				346.4				346.3
Std. Deviation				15.03				39.89				39.37				57.37
Std. Error of Mean				6134				16.28				17.61				28.68
Unpaired t test, comparing each sample to wild type (Software: Graphpad)
P value								0.0001				0.0001				0.0017
P value summary								***				***				**
Significantly different (P < 0.05)?								Yes				Yes				Yes
One- or two-tailed P value?								Two-tailed				Two-tailed				Two-tailed
t, df								t=6.207, df=10				t=6.399, df=9				t=4.613, df=8
How big is the difference?
Mean of wild type								235.8				235.8				235.8
Mean of sample								343.8				346.4				346.3
Difference between means ± SEM								108.0 ± 17.40				110.6 ± 17.28				110.4 ± 23.94
95% confidence interval								69.23 to 146.8				71.48 to 149.7				55.22 to 165.6
R squared (eta squared)								0.7939				0.8198				0.7268
F test to compare variances
F, DFn, Dfd								7.047, 5, 5				6.865, 4, 5				14.58, 3, 5
P value								0.0515				0.0580				0.0132
P value summary								ns				ns				*
Significantly different (P < 0.05)?								No				No				Yes

## Sheet: Figure_4_FiberLengths
Time point	24 h APF																										32 h APF
Mef2-GAL4	wild type				Yorkie-IR-1				Yorkie-IR-2				Yorkie-CA				warts-IR				Hippo-IR						wild type				Yorkie-IR-1				Yorkie-IR-2				Yorkie-CA				warts-IR				Hippo-IR
	data acquisition	pupae number	fiber length[µm]	av fiber length [µm]	data acquisition	pupae number	fiber length[µm]	av fiber length [µm]	data acquisition	pupae number	fiber length[µm]	av fiber length [µm]	data acquisition	pupae number	fiber length[µm]	av fiber length [µm]	data acquisition	pupae number	fiber length[µm]	av fiber length [µm]	data acquisition	pupae number	fiber length[µm]	av fiber length [µm]			data acquisition	pupae number	fiber length[µm]	av fiber length [µm]	data acquisition	pupae number	fiber length[µm]	av fiber length [µm]	data acquisition	pupae number	fiber length[µm]	av fiber length [µm]	data acquisition	pupae number	fiber length[µm]	av fiber length [µm]	data acquisition	pupae number	fiber length[µm]	av fiber length [µm]	data acquisition	pupae number	fiber length[µm]
	03.07.2017	2	240		25.08.2017	7	298		27.07.2017	2	246		25.08.2017	5	152		31.10.2017	4	141		10.10.2017	1	184				07.07.2017	3	273		11.08.2017	2	285		12.05.2017	4	250		12.05.2017	3	86		12.10.2017	1	66		26.10.2017	16	127
			248				322				245				168				150				210						301				309				291				106				107				143
			263				323				240	244			186				176				236						301				333				295				113				110				140
			257	252			319	316	25.08.2017- I	6	265				201				187	164			233						306				338				285	281			127	108			109			15	117
	08.09.2017	6	162			4	389				263				212	184		3	128				259						396	316			316			3	264		03.07.2017	4	110				154	110			149
			192				355	372			264	264		4	117				150				255	230			10.08.2017	6	113				302	314			273				138	124	20.10.2017	2	107				168
			212			3	290			5	299				134				165			2	185						134			1	271				292			3	73				124	116			175
			227				297				303				159	137			191	159			211						139				329				287				81	77		1	96				190
			234				289				298			2	111			2	132				223						135				328				272	278		1	96				120	108		14	107
			244	212			293	293			261	291			129				164				247						138	132			320			1	295				109	103	06.12.2017	2	99				141
		5	191			2	303			4	218				152				180				247	223				4	117				303	311			288		02.10.2017	7	84				99				163
			212				333				235				163	139			202		27.10.2017	1	172						125		02.10.2017	4	285				254	279			89	87			111	103			191
			224				377				245			1	126				202	176			186						137				309		03.07.2017	6	261			2	113			1	76			13	206
			238				321				255				140			1	129				209						134				307				295				147				85	81			200
			249	223			307	329			266	244			154				146				218	197					131				316				319				157	139	22.02.2018	1	83				208
		4	196		08.09.2017	2	282			3	296				155	144			167		31.10.2017	10	138						136	130			302	304			326		25.10.2017	4	57				103			12	88
			217				319				308			3	135				190	158			175					3	210			3	331				312	303			59				112				95
			231				345				304				158		15.03.2018	5	185				194						238				330			5	262				69				129				101
			234				357				299	302			187				209	197			221	182					264				317				291				71	64			137	113			97
			238				360	333		2	225				189	168		2	169			9	152						273				299	320			315			1	130		25.02.2018	6	57				103
			246	227		1	342				234		08.09.2017	3	167				186				170						268			2	343				320				110	120			88			11	110
		3	208				361				240				166				209	188			192						260	253			345				312		21.12.2017	3	103				93				138
			220				357				252				190	175		1	181				218					2	122				338				286	298			123				91				179
			229				358	355			257	242		2	147				175	178			220	191					121				323	338		3	262				101				79	82			194
			248	227	11.10.2017	7	297			1	300				166	157	20.03.2018	3	183			8	154						121			1	278				279	271			98	107		5	70				199
		2	215				301				303		12.10.2017	7	162				192	188			163						115	120			330			2	279			2	77				82			10	99
			237				300	300			300				158			2	136				184					1	208				332				308				131				81				116
			253			6	338				299	301			195				169				211	178					236				338				289				106	105			110				119
			264				340			2	273				200	179			183			7	154						253				327				272	287		1	86				110	91			144
			294				329	336			280			6	147				184	168			176						259				318	321		1	239				102	94		4	77				148
			299	261		5	329				276	277			155	151		1	168				178						263		10.10.2017	1	368				280		22.12.2017	3	86				81				142
		1	204				320		25.08.2017 - II	1	262			5	164				173	171			188	174					241	244			364	366			316				98				89			9	83
			223				320				277				176							6	171				02.10.2017	4	241			5	272				307				87	91			90	85			110
			240				306	319			290				199	180							184						266				288				283			1	80			3	72				133
			257			3	287				285	279		4	151								198						283				288	283			273	283			86				86				125
			281	241			301								162								212	192					297		07.11.2017	2	301		07.07.2017	3	281				123	97			96	85			121
	12.10.2017	3	285				299								166	160						5	164						289				331				275		29.01.2018	3	107			2	55			8	169
			295				305	298						3	139								174						279	276			321	318			247	268			113	110			66				191
			316			2	362								147								193					3	225			1	352			2	175			2	95				78				220
			298	299			368								178	155							206	185					257				335	344			190				86				76				210
		2	252				372	368						2	126							4	149						280		26.01.2018	5	344				204				90	91			85	72			227
			267			1	248								133								195						281				360	352			202			1	72			1	64			7	145
			270	263			252								133								206						270			4	316				196	194			100	86			69				181
		1	299				265								137	133							222						252	261			315			1	228		01.03.2018	6	89				74				206
			307	303			257	256						1	128								226	200				2	239				316	316			275				126	108			80	72			222
	19.02.2018	2	286		27.10.2017	1	345								127	128						3	157						273			3	349				281	262		5	45								252
			281				340						23.02.2018	4	114								168						302				349		10.08.2017	4	265				61	53						6	68
			256				330								136								190						315				325	341			259			4	56								86
			246	268			322	335							142								188						317			2	235				243	256			56								91
	23.02.2018	2	187		19.02.2018	1	360								155								194	180					306	292			235			3	288				47	53							88
			201				349								170							2	157					1	156				221	231			321			3	146								74
			218				332	347							170	148							172						171			1	316				339				111	129						5	80
			231		20.03.2018	2	295							3	139								192						181				316				347	324		2	61								112
			252				300	298							159								202						189				317			1	234				61	61							133
			244	223		1	260								185								214						187				306	314			266												137
		1	252				264								196	170							224	194					180	178	29.01.2018	1	306				272												130
			261				275							2	131												11.10.2017	2	233				317				273	262											125
			283				266	267							125														262				313															3	108
			274	268	19.12.2018	2	384								166														287				294																141
	20.03.2018	1	231				381	383							161	146													292				279	302															185
			236			3	353							1	140														292		01.03.2018	3	367																192
			255	241			349								149														275	274			345															2	147
	26.11.2018	4	194				357								159	150												1	232				346	353															162
			240				334	349					20.03.2018	2	150														267			2	282																186
			252	229	13.02.2019	3	379								159	155													301				276																191
		3	224				375							1	173														299				266	275															195
			255				401								173	173													294		15.03.2018	6	305																192
			267				399	389					25.01.2019	10	135														272	278			308															1	150
			272			2	348								143												02.11.2017	3	147				297	304															171
			281	260			364								153	144													174			5	342																179
		2	193				353							8	177														174				334														07.11.2017	15	39
			208				344	353							179														165				300	326															50
			225												164	174													152	163		4	277																51
			237											7	143													2	139				307																60
			257	224											157														154				305	297															52
		1	200												174														164			3	323															14	52
			212												182	164													164				321																60
			230											6	161														143	153			305																57
			242												163	162												1	148				294	311															68
			248	227										5	125														161			2	324																87
	03.12.2018	5	233												149														172				321																94
			256												156	144													179				310															12	91
			264											4	136														167				294	313															123
			259												125														153	164		1	342																157
			281												136	133											14.11.2017	3	184				333																161
			274	262										2	138														217				303	326															182
		4	213												157	148													236																			11	83
			287											1	127														232																				97
			312	271											130														220																				117
		3	257												157	138													209	217																			127
			261										13.02.2019	6	146													2	215																				124
			278	266											172														232																			10	97
		2	233												169														270																				114
			262												177														281																				135
			276												192	172													266	253																			135
			288	265										5	129												22.12.2017	1	203																				144
		1	256												137														238																			9	116
			273												144														248																				151
			279												158														259																				197
			313												160	146													255																				189
			295	284										4	136														241	241																			197
	20.12.2018	6	226												151													2	250																			7	104
			280												166	151													280																				140
			281											1	148														309																				167
			301	272											157														312																				151
		5	213												181														312																				187
			234												197														289	292																		6	72
			245												190	175												4	297																				110
			260																										302																				115
			269																										323																				112
			267	248																									337																				114
		4	216																										345	321																		5	56
			233																									3	222																				64
			248																										248																				60
			263																										283																				73
			283																										292																				74
			287	255																									281																				64
		3	235																										269	266																		4	100
			255																								29.01.2018	3	103																				151
			274																										138																				145
			296																										140																				142
			314																										139																			3	190
			306	280																									127	130																			220
		2	250																									2	160																				222
			261																										181																			2	77
			272																										183																				99
			276																										188																				117
			298	272																									179																				119
																													163	176																			126
																												1	116																				108
																													126																			1	86
																													136																				112
																													138																				130
																													135	131																			141
																											22.02.2018	4	116																				143
																													134																				136
																													142	131																	14.11.2017	8	93
																												3	116																				106
																													120																				125
																													131																				121
																													135																				134
																													128	126																		7	104
																												2	221																				112
																													240																				113
																													258																				116
																													268																				99
																													276																				95
																													260	254																		6	150
																												1	219																				155
																													257																				174
																													271																				209
																													281																				208
																													263	259																			193
																											25.02.2018	6	242																			5	113
																													290																				134
																													306																				138
																													296																				166
																													277	283																			171
																												5	144																			3	106
																													160																				148
																													186																				154
																													188																				160
																													170																				169
																													159	168																		2	80
																												4	232																				98
																													257																				106
																													286																				103
																													291																				97
																													286																		20.03.2018	2	140
																													282	273																			194
																												3	133																				196
																													159																				205
																													179																			1	120
																													185																				168
																													179																				175
																													175	169																			201
																												1	171																				211
																													196																				213
																													212
																													222
																													225
																													213	207
																											01.03.2018	2	181
																													237
																													235
																													245
																													235	227
																											15.03.2018	3	229
																													196	213
																												2	214
																													237
																													255
																													271
																													273
																													260	252
																												1	210
																													236
																													252
																													268
																													269
																													253	248
																											20.03.2018	2	158
																													182
																													188
																													172
																													170	174
Average fiber length [µm]				254.393				329.8				271.556				155.719				174.7				193.833						216.974				315.833				274.714				95.5714				93.1667
p value (Student's t test)								<0.001				0.0714				<0.001				<0.001				<0.001										<0.001				0.0014				<0.001				<0.001
P value summary								***				ns				***				***				***										***				**				***				***
Descriptive statistics (Software: Graphpad)
Number of values				28				20				9				32				10				12						38				24				14				21				12
Minimum				212.0				256.0				242.0				128.0				158.0				174.0						120.0				231.0				194.0				53.00				72.00
25% Percentile				227.5				298.5				244.0				144.0				162.8				180.5						163.8				304.0				262.0				81.50				81.25
Median				260.5				334.0				277.0				153.0				173.5				191.5						234.0				315.0				278.5				97.00				88.00
75% Percentile				270.3				354.5				296.0				171.5				188.0				199.3						267.8				335.0				289.8				109.0				109.5
Maximum				303.0				389.0				302.0				184.0				197.0				230.0						321.0				366.0				324.0				139.0				116.0
Range				91.00				133.0				60.00				56.00				39.00				56.00						201.0				135.0				130.0				86.00				44.00
Mean				254.4				329.8				271.6				155.7				174.7				193.8						217.0				315.8				274.7				95.57				93.17
Std. Deviation				24.04				36.60				24.25				15.66				13.17				17.25						61.07				28.14				29.49				24.06				16.02
Std. Error of Mean				4542				8184				8085				2768				4166				4978						9907				5744				7882				5249				4623
Unpaired t test, comparing each sample to wild type (Software: Graphpad)
P value								<0.001				0.0714				<0.001				<0.001				<0.001										<0.001				0.0014				<0.001				<0.001
P value summary								***				ns				***				***				***										***				**				***				***
Significantly different (P < 0.05)?								Yes				No				Yes				Yes				Yes										Yes				Yes				Yes				Yes
One- or two-tailed P value?								Two-tailed				Two-tailed				Two-tailed				Two-tailed				Two-tailed										Two-tailed				Two-tailed				Two-tailed				Two-tailed
t, df								t=8.622, df=46				t=1.860, df=35				t=19.07, df=58				t=9.908, df=36				t=7.876, df=38										t=7.431, df=60				t=3.380, df=50				t=8.716, df=57				t=6.903, df=48
How big is the difference?
Mean of wild type								254.4				254.4				254.4				254.4				254.4										217.0				217.0				217.0				217.0
Mean of sample								329.8				271.6				155.7				174.7				193.8										315.8				274.7				95.57				93.17
Difference between means ± SEM								75.41 ± 8.746				17.16 ± 9.229				-98.67 ± 5.175				-79.69 ± 8.043				-60.56 ± 7.689										98.86 ± 13.30				57.74 ± 17.08				-121.4 ± 13.93				-123.8 ± 17.94
95% confidence interval								57.80 to 93.01				-1.574 to 35.90				-109.0 to -88.31				-96.01 to -63.38				-76.12 to -44.99										72.25 to 125.5				23.43 to 92.06				-149.3 to -93.51				-159.9 to -87.74
R squared (eta squared)								0.6177				0.08992				0.8624				0.7317				0.6201										0.4792				0.1860				0.5713				0.4982
F test to compare variances
F, DFn, Dfd								2.319, 19, 27				1.018, 8, 27				2.357, 27, 31				3.329, 27, 9				1.942, 27, 11										4.711, 37, 23				4.288, 37, 13				6.446, 37, 20				14.54, 37, 11
P value								0.0446				0.8924				0.0226				0.0636				0.2472										0.0002				0.0071				<0.0001				<0.0001
P value summary								*				ns				*				ns				ns										***				**				****				****
Significantly different (P < 0.05)?								Yes				No				Yes				No				No										Yes				Yes				Yes				Yes
[truncated: 1 more columns]

## Sheet: Figure_4_supp_flighttest
Time point: 0-3 days
Mef2-GAL4	wild type				Yorkie-IR-1					Yorkie-IR-2			Yorkie-CA		Hippo-IR
	Experiment 1	Experiment 2	Experiment 3	Mean	Experiment 1	Experiment 2	Experiment 3	Experiment 4	Mean	Experiment 1	Experiment 2	Mean	Experiment 1	Mean	Experiment 1	Experiment 2	Mean
% of flies in zone1 (lowest)	0	0	0	0	100	100	100	100	100	100	100	100	100	100	100	100	100
% of flies in zone2	0	0	0	0	0	0	0	0	0	0	0	0	0	0	0	0	0
% of flies in zone3	0	0	0	0	0	0	0	0	0	0	0	0	0	0	0	0	0
% of flies in zone4	0	0	0	0	0	0	0	0	0	0	0	0	0	0	0	0	0
% of flies in zone5 (highest)	100	100	100	100	0	0	0	0	0	0	0	0	0	0	0	0	0
Total number of flies				61					65			50		34			14
Independent experiment days				3					4			2		1			2

## Sheet: Figure_4_supp_RNAexpression
FBgn	Symbol
		IFM 16hAPF 1	IFM 16hAPF 2	IFM 16hAPF 3	IFM 24hAPF 1	IFM 24hAPF 2	IFM 24hAPF 3	IFM 30hAPF 1	IFM 30hAPF 2	IFM 48hAPF 1	IFM 48hAPF 2	IFM 48hAPF 3	IFM 72hAPF 1	IFM 72hAPF 2	IFM 90hAPF 1	IFM 90hAPF 2	IFM 1d adult 1	IFM 1d adult 2
FBgn0032363	Dlg5	3324.96	2217.76	701.868	3101.17	2722.56	2723.82	3591.77	2422.41	2888.41	2588.87	3421.84	2105.05	1986.51	3065.83	2860.54	3251.9	3070.02
FBgn0040011	Slmap	1847.46	2525.9	1221.77	3346.76	3061.01	2829.27	3733.05	861.92	1095.61	1720.04	1369.51	1318.66	1166.44	1771.23	1714.86	703.344	1084.65
FBgn0261456	hpo	2748.66	2192.85	934.248	2239.07	1750.05	1881.06	2360.78	2705.99	1883.36	2047.67	2280.46	1500.66	1678.47	1440.29	1703.84	1512.05	1395.46
FBgn0034970	yki	2106.75	1868.37	1913.4	2350.86	2056.44	2136.6	2468.65	2076.42	1951.26	1618.23	1544.28	1651.76	1719.54	1502.73	2221.6	1865.14	1657.64
FBgn0011739	wts	3267.25	2308.06	1863.38	2596.44	2504.98	2358.93	3228.06	2126.14	2272.7	1697.08	1982.74	5842.97	3833.37	3952.48	5126.21	3493.94	3412.54
FBgn0003345	sd	9246	7249.47	9672.94	12077.8	9325.7	8590.74	10730	6701.06	6342.74	4746	4276.34	1849.21	1542.93	2890.99	1490.86	2915.89	2867.04
Source:	Spletter et al. eLife, 2018.
	PMID: 29846170

## Sheet: Figure5_24h_Volume&NucleiNumber
Time point	24 h APF
TubGAL80-ts;;Mef2-GAL4	wild type								Dlg5-IR-1								Yorkie-IR-1								Yorkie-CA
	data acquisition	pupae number	cross sectional area[µm2]	fiber length[µm]	Volume [µm3]	number of nuclei	length used for nuclei count	extrapolated nuclei number for the whole fiber	data acquisition	pupae number	cross sectional area[µm2]	fiber length[µm]	Volume [µm3]	number of nuclei	length used for nuclei count	extrapolated nuclei number for the whole fiber	data acquisition	pupae number	cross sectional area[µm2]	fiber length[µm]	Volume [µm3]	number of nuclei	length used for nuclei count	extrapolated nuclei number for the whole fiber	data acquisition	pupae number	cross sectional area[µm2]	fiber length[µm]	Volume [µm3]	number of nuclei	length used for nuclei count	extrapolated nuclei number for the whole fiber
	03.07.2019	1	766	367	281122	237	121	718.835	03.07.2019	1	657	411	270027	225	106	872.406	03.07.2019	1	613	367	224971	250	123	745.935	03.07.2019	1	2521	191	481511	546	150	695.24
		2	788	337	265556	225	128	592.383		2	1000	350	350000	253	136	651.103		2	775	373	289075	235	131	669.122		2	1228	155	190340	549	134	635.037
	30.07.2019	2	1240	309	383160	181	113	494.947		3	722	393	283746	237	127	733.394	30.07.2019	1	958	417	399486	321	120	1115.48		3	2260	143	323180	748	125	855.712
		4	1376	262	360512	208	129	422.45	31.07.2019	2	493	442	217906	143	127	497.685		2	1081	376	406456	281	120	880.467		4	2112	163	344256	624	124	820.258
	15.10.2019	1	1518	266	403788	250	119	558.824	15.10.2019	1	833	449	374017	271	122	997.369	15.10.2019	1	516	389	200724	198	117	658.308	15.10.2019	1	4454	155	690370	616	135	707.259
		2	1568	249	390432	295	128	573.867	26.02.2020	1	784	422	330848	157	130	509.646	19.11.2019	1	624	455	283920	154	132	530.833	27.02.2020	1	5169	142	733998	664	142	664
	04.11.2019	2	1238	300	371400	327	128	766.406									26.02.2020	8	815	394	321110	197	129	601.69		2	6001	127	762127	582	127	582
		3	1325	276	365700	256	112	630.857										9	385	393	151305	161	131	483		3	4165	130	541450	467	130	467
		6	1244	300	373200	485	130	1119.23																	26.02.2020	5	5533	120	663960	576	120	576
		7	1343	259	347837	306	134	591.448
		8	1274	221	281554	329	134	542.604
		10	1671	254	424434	323	127	646
	26.02.2020	1	1726	257	443582	416	131	816.122
Average			1313.62	281.308	360944			651.844			748.167	411.167	304424			710.267			720.875	395.5	284631			710.604			3715.89	147.333	525688			666.945
p value (Student's t test)											<0.001	<0.001	0.0560			0.5275			<0.001	<0.001	0.0260			0.4943			<0.001	<0.001	0.0113			0.8264
Descriptive statistics (Software: Graphpad)
Number of values			13	13	13			13			6	6	6			6			8	8	8			8			9	9	9			9
Minimum			766.0	221.0	265556			422.0			493.0	350.0	217906			498.0			385.0	367.0	151305			483.0			1228	120.0	190340			467.0
25% Percentile			1239	255.5	314696			551.0			616.0	382.3	256997			507.0			540.3	373.8	206786			548.8			2186	128.5	333718			579.0
Median			1325	266.0	371400			592.0			753.0	416.5	307297			692.0			699.5	391.0	286498			663.5			4165	143.0	541450			664.0
75% Percentile			1543	304.5	397110			742.5			874.8	443.8	356004			903.3			922.3	411.3	379892			846.5			5351	159.0	712184			763.5
Maximum			1726	367.0	443582			1119			1000	449.0	374017			997.0			1081	455.0	406456			1115			6001	191.0	762127			856.0
Range			960.0	146.0	178026			697			507.0	99.00	156111			499.0			696.0	88.00	255151			632.0			4773	71.00	571787			389.0
Mean			1314	281.3	360944			651.8			748.2	411.2	304424			710.2			720.9	395.5	284631			710.5			3716	147.3	525688			666.9
Std. Deviation			289.1	39.85	54989			176.6			170.9	36.25	57818			198.8			231.0	28.67	90837			204.9			1721	21.73	204365			121.5
Std. Error of Mean			80.18	11.05	15251			48.99			69.76	14.80	23604			81.15			81.67	10.13	32116			72.44			573.6	7244	68122			40.49
Unpaired t test, comparing each sample to wild type (Software: Graphpad)
P value											<0.001	<0.001	0.0560			0.5275			<0.001	<0.001	0.0260			0.4943			<0.001	<0.001	0.0113			0.8264
P value summary											***	***	ns			ns			***	***	*			ns			***	***	*			ns
Significantly different (P < 0.05)?											Yes	Yes	No			No			Yes	Yes	Yes			No			Yes	Yes	Yes			No
One- or two-tailed P value?											Two-tailed	Two-tailed	Two-tailed			Two-tailed			Two-tailed	Two-tailed	Two-tailed			Two-tailed			Two-tailed	Two-tailed	Two-tailed			Two-tailed
t, df											t=4.407, df=17	t=6.776, df=17	t=2.051, df=17			t=0.6450, df=17			t=4.901, df=19	t=7.032, df=19	t=2.414, df=19			t=0.6969, df=19			t=4.986, df=20	t=9.143, df=20	t=2.792, df=20			t=0.2222, df=20
How big is the difference?
Mean of wild type											1314	281.3	360944			651.8			1314	281.3	360944			651.8			1314	281.3	360944			651.8
Mean of sample											748.2	411.2	304424			710.2			720.9	395.5	284631			710.5			3716	147.3	525688			666.9
Difference between means ± SEM											-565.4 Â± 128.3	129.9 Â± 19.16	-56520 Â± 27558			58.40 Â± 90.53			-592.7 Â± 120.9	114.2 Â± 16.24	-76314 Â± 31614			58.73 Â± 84.27			2402 Â± 481.8	-134.0 Â± 14.65	164744 Â± 59012			15.12 Â± 68.05
95% confidence interval											-836.1 to -294.8	89.43 to 170.3	-114662 to 1622			-132.6 to 249.4			-845.9 to -339.6	80.20 to 148.2	-142483 to -10144			-117.7 to 235.1			1397 to 3407	-164.5 to -103.4	41646 to 287841			-126.8 to 157.1
R squared (eta squared)											0.5333	0.7298	0.1984			0.02389			0.5583	0.7224	0.2347			0.02492			0.5541	0.8069	0.2804			0.002463
F test to compare variances
F, DFn, Dfd											2.862, 12, 5	1.209, 12, 5	1.106, 5, 12			1.266, 5, 12			1.566, 12, 7	1.933, 12, 7	2.729, 7, 12			1.345, 7, 12			35.44, 8, 12	3.363, 12, 8	13.81, 8, 12			2.114, 12, 8
P value											0.2541	0.8921	0.8143			0.6792			0.5654	0.3894	0.1217			0.6214			<0.0001	0.0937	0.0001			0.2941
P value summary											ns	ns	ns			ns			ns	ns	ns			ns			****	ns	***			ns
Significantly different (P < 0.05)?											No	No	No			No			No	No	No			No			Yes	No	Yes			No

[truncated: 14 more sheets: Figure_5_24h_CryoCrossSection, Figure_5_32h_FiberLengths, Figure_6_Volume, Figure_7_myofibriltraces, Figure_7_cryo_sections, Figure7_supp1_konIR_volume, Figure9_MhcGFP_24h, Figure9_MhcGFP_32h, Figure9_Act88FGFP_24h, Figure9_Act88FGFP_32h, Figure9supp_PrmGFP_24h, Figure9supp_PrmGFP_32h, Figure9supp_SlsGFP_24h, Figure9supp_SlsGFP_32h]
