# Supplementary material for: The Hippo pathway controls myofibril assembly and muscle fiber growth by regulating sarcomeric gene expression
Source: eLife. 2021 Jan 6;10:e63726. doi: 10.7554/eLife.63726 (PMC7815313; doi:10.7554/eLife.63726)
Supplement: Supplementary file 2. — All or only the significantly different genes are listed. [file elife-63726-supp2.xlsx]

## Sheet: 24h-Dlg5-IR-sig
ensembl_gene_id	external_gene_name	baseMean	log2FoldChange	lfcSE	stat	pvalue	padj	wild type 24h_1	wild type 24h_2	Dlg5-IR 24h_1	Dlg5-IR 24h_2	Mean24h wild type	Mean24h Dlg5-IR
FBgn0038595	CG7142	292.956	-2.92583	0.385498	-7.58975	3.20531e-14	1.1334e-10	365.487	314.671	60.9885	30.5464	340.079	45.7675
FBgn0003149	Prm	1110.03	-2.90724	0.453971	-6.40402	1.51334e-10	2.67558e-07	168.282	170.991	31.6237	15.2732	169.636	23.4484
FBgn0029761	SK	1292.66	-2.48673	0.44021	-5.64895	1.61429e-08	1.14162e-05	988.655	1435.61	251.86	182.057	1212.13	216.958
FBgn0030364	Lsm12a	465.213	-1.24709	0.219128	-5.69118	1.26165e-08	1.14162e-05	1248.97	822.895	466.449	402.601	1035.93	434.525
FBgn0035793	CG7546	157.458	-1.24256	0.219385	-5.6638	1.48055e-08	1.14162e-05	247.164	262.424	100.518	114.244	254.794	107.381
FBgn0032821	CdGAPr	306.22	-1.98696	0.364858	-5.44585	5.15598e-08	3.03859e-05	262.94	269.549	76.8004	58.6491	266.244	67.7247
FBgn0020513	Paics	189.018	1.62331	0.318774	5.09236	3.53629e-07	0.000178633	120.952	135.368	494.685	302.409	128.16	398.547
FBgn0029881	pigs	473.454	-1.6651	0.353952	-4.70431	2.54723e-06	0.000902234	386.522	352.669	106.165	125.851	369.596	116.008
FBgn0261836	Msp300	4815.79	-2.00001	0.433645	-4.61209	3.98649e-06	0.00124422	5484.93	5900.39	1573.28	1273.78	5692.66	1423.53
FBgn0030519	CG11151	337.354	2.04891	0.445404	4.60012	4.22246e-06	0.00124422	102.547	197.115	864.004	396.492	149.831	630.248
FBgn0266918	CG32486	397.744	-1.45782	0.327147	-4.45617	8.34379e-06	0.00226951	612.65	596.095	207.813	231.542	604.372	219.677
FBgn0037344	CG2926	211.999	-1.25231	0.300515	-4.16722	3.0834e-05	0.00716407	428.592	341.983	167.154	155.176	385.287	161.165
FBgn0033624	CG12384	226.939	1.55589	0.376328	4.13439	3.55905e-05	0.00740283	134.099	110.432	440.473	274.918	122.266	357.695
FBgn0052666	Drak	187.455	-1.72835	0.428753	-4.0311	5.55158e-05	0.00955365	260.311	248.175	91.4828	62.9256	254.243	77.2042
FBgn0086906	sls	2917.1	-1.71426	0.4243	-4.0402	5.34047e-05	0.00955365	5006.38	5990.63	1711.07	1640.95	5498.51	1676.01
FBgn0264492	CkIIalpha	691.471	1.00089	0.248608	4.02598	5.67383e-05	0.00955365	305.01	446.477	885.463	638.42	375.744	761.941
FBgn0031220	CG4822	103.689	1.91321	0.474728	4.03013	5.57455e-05	0.00955365	31.5528	35.6232	145.695	110.578	33.588	128.136
FBgn0028663	VhaM9.7-b	324.788	1.26311	0.320773	3.93772	8.22591e-05	0.0132213	168.282	197.115	578.262	307.297	182.698	442.779
FBgn0001316	klar	615.505	-1.39887	0.357817	-3.90947	9.25e-05	0.0142209	728.344	881.08	275.578	334.788	804.712	305.183
FBgn0267861	Maf1	282.521	1.42576	0.366813	3.88688	0.00010154	0.0149602	86.7702	156.742	353.508	316.461	121.756	334.984
FBgn0035402	Usp5	170.687	-1.19929	0.310637	-3.86073	0.000113047	0.0154337	352.34	288.548	164.895	114.854	320.444	139.875
FBgn0034345	CG5174	452.059	1.10017	0.285555	3.85274	0.000116804	0.0154337	202.464	317.046	554.544	574.883	259.755	564.713
FBgn0047135	CG32276	453.035	1.36875	0.355468	3.85056	0.000117848	0.0154337	291.863	230.363	843.675	500.35	261.113	672.012
FBgn0259923	Sep4	450.975	-1.69442	0.448354	-3.7792	0.000157333	0.0192157	707.309	756.399	262.025	191.22	731.854	226.623
FBgn0285926	Imp	1015.83	-1.5752	0.418698	-3.76214	0.000168464	0.0192157	515.363	454.789	167.154	158.23	485.076	162.692
FBgn0039969	Fis1	240.44	1.34284	0.355425	3.77813	0.000158008	0.0192157	147.246	123.494	437.084	247.426	135.37	342.255
FBgn0033017	CG10465	94.4574	1.5771	0.418893	3.76493	0.000166598	0.0192157	36.8116	51.0599	156.989	113.022	43.9358	135.005
FBgn0010397	LamC	434.351	-1.97074	0.526116	-3.74582	0.000179803	0.019627	780.932	641.217	254.119	109.967	711.075	182.043
FBgn0036697	rogdi	80.3862	2.21911	0.593159	3.74116	0.00018317	0.019627	10.5176	28.4985	84.7063	109.967	19.5081	97.3366
FBgn0011828	Pxn	251.684	-1.34734	0.361253	-3.72962	0.000191768	0.0199439	318.158	254.112	114.071	109.967	286.135	112.019
FBgn0260795	NaPi-III	104.219	-1.47775	0.401883	-3.67705	0.000235947	0.0231014	57.8468	112.807	31.6237	31.7683	85.3268	31.696
FBgn0003721	Tm1	3142.37	-1.36556	0.371998	-3.67087	0.000241729	0.0231014	4953.79	5333.98	2187.68	1805.9	5143.88	1996.79
FBgn0034528	CG11180	96.6455	-1.46265	0.406464	-3.59847	0.000320101	0.0282969	97.2878	130.618	48.5649	36.0447	113.953	42.3048
FBgn0013749	Arf102F	133.888	1.45684	0.404808	3.59885	0.000319631	0.0282969	81.5114	71.2464	252.989	164.951	76.3789	208.97
FBgn0284436	CCT8	1136.84	-1.16396	0.324652	-3.58527	0.00033673	0.0287639	2174.51	1741.97	934.028	813.145	1958.24	873.586
FBgn0029873	CG3918	75.4194	-1.07671	0.300633	-3.58148	0.000341652	0.0287639	118.323	147.242	67.765	60.4819	132.783	64.1234
FBgn0263380	lncRNA:CR43432	67.0291	1.61203	0.4538	3.5523	0.000381876	0.0306889	34.1822	42.7478	117.459	121.575	38.465	119.517
FBgn0031869	CG18304	310.685	-1.75142	0.495365	-3.53561	0.000406831	0.0319303	234.017	324.171	99.3887	67.813	279.094	83.6008
FBgn0031403	CG15387	168.351	1.14287	0.323748	3.53011	0.000415383	0.0319303	73.6232	136.556	310.59	172.893	105.089	241.741
FBgn0029941	CG1677	184.262	-1.12765	0.320013	-3.52375	0.000425489	0.0320112	357.599	248.175	120.848	152.732	302.887	136.79
FBgn0023540	CG3630	115.626	-2.03631	0.579396	-3.51454	0.000440519	0.0324516	144.617	138.93	42.9178	26.8808	141.774	34.8993
FBgn0011230	poe	270.619	-1.21814	0.350087	-3.47955	0.000502258	0.0362446	389.151	409.667	164.895	178.391	399.409	171.643
FBgn0264075	tgo	91.9455	1.61333	0.464598	3.47252	0.000515592	0.0364627	21.0352	47.4976	58.7297	160.674	34.2664	109.702
FBgn0002869	MtnB	84.4507	-3.72685	1.07869	-3.45498	0.000550333	0.0371219	21.0352	20.1865	1.12942	1.83278	20.6108	1.4811
FBgn0016693	Past1	1273.24	-1.31439	0.38076	-3.45202	0.000556409	0.0371219	1162.2	1543.67	609.885	480.189	1352.93	545.037
FBgn0034137	CG4945	157.998	-1.43364	0.416651	-3.44087	0.000579849	0.0379694	260.311	274.298	92.6122	105.08	267.305	98.8459
FBgn0002521	pho	131.846	1.20655	0.351173	3.43577	0.000590883	0.0379884	49.9586	84.3082	141.177	179.002	67.1334	160.09
FBgn0030158	CG9686	637.937	1.3711	0.40156	3.41443	0.000639158	0.0403583	226.128	346.732	891.11	601.764	286.43	746.437
FBgn0051313	CG31313	104.857	2.05856	0.605149	3.40174	0.000669581	0.0415375	47.3292	60.5594	282.354	171.671	53.9443	227.012
FBgn0041096	rols	105.364	-1.49228	0.442031	-3.37596	0.000735579	0.044648	194.576	160.304	55.3414	69.6458	177.44	62.4936
FBgn0010877	l(3)05822	72.8465	1.46314	0.433848	3.37247	0.000744975	0.044648	15.7764	49.8725	92.6122	104.469	32.8244	98.5404
FBgn0000287	salr	684.655	-1.6195	0.481601	-3.36275	0.000771693	0.0454784	999.172	1134	358.025	336.621	1066.59	347.323
FBgn0261649	tinc	159.841	-1.54786	0.462521	-3.34658	0.000818161	0.0466616	118.323	173.366	51.9532	48.8742	145.845	50.4137
FBgn0024754	Flo1	213.771	-1.06882	0.31926	-3.34781	0.000814517	0.0466616	270.828	309.922	121.977	154.565	290.375	138.271

## Sheet: 24h-Dlg5-IR-all
ensembl_gene_id	external_gene_name	baseMean	log2FoldChange	lfcSE	stat	pvalue	padj	wild type 24h_1	wild type 24h_2	Dlg5-IR 24h_1	Dlg5-IR 24h_2	Mean24h wild type	Mean24h Dlg5-IR
FBgn0038595	CG7142	292.956	-2.92583	0.385498	-7.58975	3.20531e-14	1.1334e-10	365.487	314.671	60.9885	30.5464	340.079	45.7675
FBgn0003149	Prm	1110.03	-2.90724	0.453971	-6.40402	1.51334e-10	2.67558e-07	168.282	170.991	31.6237	15.2732	169.636	23.4484
FBgn0029761	SK	1292.66	-2.48673	0.44021	-5.64895	1.61429e-08	1.14162e-05	988.655	1435.61	251.86	182.057	1212.13	216.958
FBgn0030364	Lsm12a	465.213	-1.24709	0.219128	-5.69118	1.26165e-08	1.14162e-05	1248.97	822.895	466.449	402.601	1035.93	434.525
FBgn0035793	CG7546	157.458	-1.24256	0.219385	-5.6638	1.48055e-08	1.14162e-05	247.164	262.424	100.518	114.244	254.794	107.381
FBgn0032821	CdGAPr	306.22	-1.98696	0.364858	-5.44585	5.15598e-08	3.03859e-05	262.94	269.549	76.8004	58.6491	266.244	67.7247
FBgn0020513	Paics	189.018	1.62331	0.318774	5.09236	3.53629e-07	0.000178633	120.952	135.368	494.685	302.409	128.16	398.547
FBgn0000559	eEF2	5433.61	-0.743401	0.151374	-4.91102	9.06031e-07	0.000400466	8703.32	7689.86	4573.01	5211.21	8196.59	4892.11
FBgn0029881	pigs	473.454	-1.6651	0.353952	-4.70431	2.54723e-06	0.000902234	386.522	352.669	106.165	125.851	369.596	116.008
FBgn0034237	eIF3b	1855.11	-0.726424	0.154428	-4.70397	2.55157e-06	0.000902234	3044.85	2507.87	1642.17	1705.71	2776.36	1673.94
FBgn0261836	Msp300	4815.79	-2.00001	0.433645	-4.61209	3.98649e-06	0.00124422	5484.93	5900.39	1573.28	1273.78	5692.66	1423.53
FBgn0030519	CG11151	337.354	2.04891	0.445404	4.60012	4.22246e-06	0.00124422	102.547	197.115	864.004	396.492	149.831	630.248
FBgn0266918	CG32486	397.744	-1.45782	0.327147	-4.45617	8.34379e-06	0.00226951	612.65	596.095	207.813	231.542	604.372	219.677
FBgn0028690	Rpn5	504.082	-0.736673	0.170224	-4.32766	1.50699e-05	0.00380623	880.849	694.652	455.155	482.022	787.751	468.589
FBgn0037135	CG7414	486.348	-0.74798	0.179985	-4.15579	3.24166e-05	0.00716407	896.626	702.964	417.884	524.176	799.795	471.03
FBgn0037344	CG2926	211.999	-1.25231	0.300515	-4.16722	3.0834e-05	0.00716407	428.592	341.983	167.154	155.176	385.287	161.165
FBgn0033624	CG12384	226.939	1.55589	0.376328	4.13439	3.55905e-05	0.00740283	134.099	110.432	440.473	274.918	122.266	357.695
FBgn0086906	sls	2917.1	-1.71426	0.4243	-4.0402	5.34047e-05	0.00955365	5006.38	5990.63	1711.07	1640.95	5498.51	1676.01
FBgn0031220	CG4822	103.689	1.91321	0.474728	4.03013	5.57455e-05	0.00955365	31.5528	35.6232	145.695	110.578	33.588	128.136
FBgn0052666	Drak	187.455	-1.72835	0.428753	-4.0311	5.55158e-05	0.00955365	260.311	248.175	91.4828	62.9256	254.243	77.2042
FBgn0264492	CkIIalpha	691.471	1.00089	0.248608	4.02598	5.67383e-05	0.00955365	305.01	446.477	885.463	638.42	375.744	761.941
FBgn0028663	VhaM9.7-b	324.788	1.26311	0.320773	3.93772	8.22591e-05	0.0132213	168.282	197.115	578.262	307.297	182.698	442.779
FBgn0001316	klar	615.505	-1.39887	0.357817	-3.90947	9.25e-05	0.0142209	728.344	881.08	275.578	334.788	804.712	305.183
FBgn0267861	Maf1	282.521	1.42576	0.366813	3.88688	0.00010154	0.0149602	86.7702	156.742	353.508	316.461	121.756	334.984
FBgn0034345	CG5174	452.059	1.10017	0.285555	3.85274	0.000116804	0.0154337	202.464	317.046	554.544	574.883	259.755	564.713
FBgn0035402	Usp5	170.687	-1.19929	0.310637	-3.86073	0.000113047	0.0154337	352.34	288.548	164.895	114.854	320.444	139.875
FBgn0047135	CG32276	453.035	1.36875	0.355468	3.85056	0.000117848	0.0154337	291.863	230.363	843.675	500.35	261.113	672.012
FBgn0285926	Imp	1015.83	-1.5752	0.418698	-3.76214	0.000168464	0.0192157	515.363	454.789	167.154	158.23	485.076	162.692
FBgn0033017	CG10465	94.4574	1.5771	0.418893	3.76493	0.000166598	0.0192157	36.8116	51.0599	156.989	113.022	43.9358	135.005
FBgn0039969	Fis1	240.44	1.34284	0.355425	3.77813	0.000158008	0.0192157	147.246	123.494	437.084	247.426	135.37	342.255
FBgn0259923	Sep4	450.975	-1.69442	0.448354	-3.7792	0.000157333	0.0192157	707.309	756.399	262.025	191.22	731.854	226.623
FBgn0010397	LamC	434.351	-1.97074	0.526116	-3.74582	0.000179803	0.019627	780.932	641.217	254.119	109.967	711.075	182.043
FBgn0036697	rogdi	80.3862	2.21911	0.593159	3.74116	0.00018317	0.019627	10.5176	28.4985	84.7063	109.967	19.5081	97.3366
FBgn0011828	Pxn	251.684	-1.34734	0.361253	-3.72962	0.000191768	0.0199439	318.158	254.112	114.071	109.967	286.135	112.019
FBgn0029676	HIP-R	420.929	-0.758025	0.204849	-3.70041	0.000215253	0.0217467	720.456	450.04	350.119	332.956	585.248	341.537
FBgn0003721	Tm1	3142.37	-1.36556	0.371998	-3.67087	0.000241729	0.0231014	4953.79	5333.98	2187.68	1805.9	5143.88	1996.79
FBgn0260795	NaPi-III	104.219	-1.47775	0.401883	-3.67705	0.000235947	0.0231014	57.8468	112.807	31.6237	31.7683	85.3268	31.696
FBgn0013749	Arf102F	133.888	1.45684	0.404808	3.59885	0.000319631	0.0282969	81.5114	71.2464	252.989	164.951	76.3789	208.97
FBgn0034528	CG11180	96.6455	-1.46265	0.406464	-3.59847	0.000320101	0.0282969	97.2878	130.618	48.5649	36.0447	113.953	42.3048
FBgn0037878	CG6693	222.455	-0.853931	0.237261	-3.59912	0.000319291	0.0282969	297.122	265.986	163.765	147.234	281.554	155.5
FBgn0029873	CG3918	75.4194	-1.07671	0.300633	-3.58148	0.000341652	0.0287639	118.323	147.242	67.765	60.4819	132.783	64.1234
FBgn0284436	CCT8	1136.84	-1.16396	0.324652	-3.58527	0.00033673	0.0287639	2174.51	1741.97	934.028	813.145	1958.24	873.586
FBgn0038476	kuk	543.435	-0.772844	0.21695	-3.56232	0.000367598	0.0302286	644.203	553.347	284.613	409.322	598.775	346.967
FBgn0263380	lncRNA:CR43432	67.0291	1.61203	0.4538	3.5523	0.000381876	0.0306889	34.1822	42.7478	117.459	121.575	38.465	119.517
FBgn0031403	CG15387	168.351	1.14287	0.323748	3.53011	0.000415383	0.0319303	73.6232	136.556	310.59	172.893	105.089	241.741
FBgn0031869	CG18304	310.685	-1.75142	0.495365	-3.53561	0.000406831	0.0319303	234.017	324.171	99.3887	67.813	279.094	83.6008
FBgn0029941	CG1677	184.262	-1.12765	0.320013	-3.52375	0.000425489	0.0320112	357.599	248.175	120.848	152.732	302.887	136.79
FBgn0023540	CG3630	115.626	-2.03631	0.579396	-3.51454	0.000440519	0.0324516	144.617	138.93	42.9178	26.8808	141.774	34.8993
FBgn0011230	poe	270.619	-1.21814	0.350087	-3.47955	0.000502258	0.0362446	389.151	409.667	164.895	178.391	399.409	171.643
FBgn0264075	tgo	91.9455	1.61333	0.464598	3.47252	0.000515592	0.0364627	21.0352	47.4976	58.7297	160.674	34.2664	109.702
FBgn0030991	CG7453	105.259	-0.965097	0.278693	-3.46294	0.000534305	0.0370451	181.429	128.243	68.8944	84.919	154.836	76.9067
FBgn0002869	MtnB	84.4507	-3.72685	1.07869	-3.45498	0.000550333	0.0371219	21.0352	20.1865	1.12942	1.83278	20.6108	1.4811
FBgn0016693	Past1	1273.24	-1.31439	0.38076	-3.45202	0.000556409	0.0371219	1162.2	1543.67	609.885	480.189	1352.93	545.037
FBgn0034137	CG4945	157.998	-1.43364	0.416651	-3.44087	0.000579849	0.0379694	260.311	274.298	92.6122	105.08	267.305	98.8459
FBgn0002521	pho	131.846	1.20655	0.351173	3.43577	0.000590883	0.0379884	49.9586	84.3082	141.177	179.002	67.1334	160.09
FBgn0030158	CG9686	637.937	1.3711	0.40156	3.41443	0.000639158	0.0403583	226.128	346.732	891.11	601.764	286.43	746.437
FBgn0051313	CG31313	104.857	2.05856	0.605149	3.40174	0.000669581	0.0415375	47.3292	60.5594	282.354	171.671	53.9443	227.012
FBgn0041096	rols	105.364	-1.49228	0.442031	-3.37596	0.000735579	0.044648	194.576	160.304	55.3414	69.6458	177.44	62.4936
FBgn0010877	l(3)05822	72.8465	1.46314	0.433848	3.37247	0.000744975	0.044648	15.7764	49.8725	92.6122	104.469	32.8244	98.5404
FBgn0000287	salr	684.655	-1.6195	0.481601	-3.36275	0.000771693	0.0454784	999.172	1134	358.025	336.621	1066.59	347.323
FBgn0024754	Flo1	213.771	-1.06882	0.31926	-3.34781	0.000814517	0.0466616	270.828	309.922	121.977	154.565	290.375	138.271
FBgn0261649	tinc	159.841	-1.54786	0.462521	-3.34658	0.000818161	0.0466616	118.323	173.366	51.9532	48.8742	145.845	50.4137
FBgn0013686	mt:lrRNA	172872	1.75381	0.528401	3.31909	0.00090312	0.0506296	21511.1	97055.4	288185	111703	59283.2	199944
FBgn0015024	CkIalpha	1200.52	-0.625846	0.188791	-3.31502	0.000916374	0.0506296	1482.98	1475.99	937.416	979.317	1479.48	958.367
FBgn0040227	eIF3d1	594.007	-0.812521	0.246833	-3.29178	0.000995546	0.0541577	993.914	732.65	557.932	423.373	863.282	490.653
FBgn0005666	bt	2155.7	-1.69397	0.515329	-3.28716	0.00101204	0.0542209	2992.26	3993.36	1246.88	913.337	3492.81	1080.11
FBgn0266084	Fhos	375.99	-1.49776	0.457092	-3.27672	0.00105019	0.0554251	341.822	483.288	134.401	158.23	412.555	146.315
FBgn0028692	Rpn2	374.598	-0.792072	0.24234	-3.26843	0.00108145	0.0562351	620.539	492.787	320.754	318.904	556.663	319.829
FBgn0039155	Kal1	195.634	-1.36484	0.418461	-3.26157	0.00110797	0.0567794	276.087	292.11	73.4121	145.401	284.099	109.406
FBgn0030082	HP1b	92.7198	1.144	0.351791	3.25193	0.00114626	0.0571801	65.735	51.0599	128.754	124.018	58.3975	126.386
FBgn0046247	CG5938	87.8903	1.18465	0.364946	3.2461	0.00116996	0.0571801	39.441	54.6222	131.012	91.0283	47.0316	111.02
FBgn0051550	CG31550	120.46	-1.57369	0.485174	-3.24356	0.00118047	0.0571801	362.857	182.866	96.0004	86.1408	272.861	91.0706
FBgn0052121	CG32121	499.351	-1.61275	0.49644	-3.24863	0.00115962	0.0571801	294.493	434.603	137.789	102.025	364.548	119.907
FBgn0013726	pnut	263.712	-0.985424	0.304196	-3.23944	0.00119764	0.0572278	473.292	314.671	155.86	236.429	393.982	196.144
FBgn0016061	side	116.214	-1.40817	0.43705	-3.22198	0.00127308	0.0600217	131.47	142.493	47.4355	55.5944	136.981	51.515
FBgn0020306	dom	270.009	-1.04564	0.325307	-3.21432	0.00130756	0.0600419	391.781	393.042	186.354	193.664	392.412	190.009
FBgn0035110	thoc7	114.285	-1.10712	0.345224	-3.20696	0.00134143	0.0600419	244.534	132.993	103.906	69.6458	188.764	86.7761
FBgn0039075	CG4393	160.198	-1.17864	0.36726	-3.20928	0.00133069	0.0600419	128.841	186.428	82.4474	59.8709	157.634	71.1592
FBgn0039130	CG5854	139.355	1.32781	0.413604	3.21033	0.00132581	0.0600419	105.176	74.8087	269.931	176.558	89.9924	223.244
FBgn0259482	Mob3	81.6027	1.76995	0.555201	3.18795	0.00143283	0.0633311	21.0352	43.9353	132.142	99.5812	32.4852	115.862
FBgn0002931	net	73.6751	1.80909	0.57416	3.15085	0.00162798	0.0710683	34.1822	47.4976	171.671	119.742	40.8399	145.707
FBgn0025864	Crag	110.176	-1.00001	0.320147	-3.12359	0.00178662	0.0743234	157.764	147.242	58.7297	91.0283	152.503	74.879
FBgn0031759	lid	272.752	-1.21329	0.387137	-3.13401	0.00172436	0.0743234	533.768	338.42	194.26	180.224	436.094	187.242
FBgn0037707	RnpS1	171.501	-0.97359	0.311456	-3.12593	0.00177244	0.0743234	315.528	227.988	120.848	152.121	271.758	136.484
FBgn0264294	Cyt-b5	213.589	1.12527	0.359999	3.12576	0.00177344	0.0743234	86.7702	144.868	278.966	238.262	115.819	258.614
FBgn0034176	ste24a	562.634	-0.856919	0.276564	-3.09845	0.00194535	0.0799857	262.94	163.867	127.624	104.469	213.403	116.046
FBgn0052638	CG32638	276.849	0.98864	0.320902	3.08081	0.00206435	0.0839029	163.023	229.176	469.837	319.515	196.099	394.676
FBgn0025683	CG3164	155.774	1.35665	0.441867	3.07026	0.00213869	0.0859366	84.1408	102.12	185.224	293.856	93.1303	239.54
FBgn0026403	Ndg	192.043	-1.69647	0.55417	-3.06128	0.00220393	0.0869295	163.023	193.553	59.8591	50.707	178.288	55.2831
FBgn0027084	LysRS	397.45	-1.09139	0.356769	-3.05909	0.00222009	0.0869295	562.692	420.354	228.142	231.542	491.523	229.842
FBgn0032997	CG17486	140.4	1.09163	0.357115	3.0568	0.00223716	0.0869295	97.2878	65.3092	175.06	163.118	81.2985	169.089
FBgn0053494	CG33494	72.5427	1.87954	0.618857	3.03711	0.0023886	0.091167	21.0352	53.4348	199.907	86.1408	37.235	143.024
FBgn0261641	CG42724	156.27	-1.12402	0.370237	-3.03595	0.00239777	0.091167	283.975	238.675	110.683	127.684	261.325	119.183
FBgn0039994	conu	117.721	0.847546	0.280069	3.0262	0.00247649	0.0931581	97.2878	68.8715	160.377	130.739	83.0797	145.558
FBgn0051472	sgll	67.7457	1.17779	0.390096	3.01924	0.00253414	0.0935673	26.294	37.9981	91.4828	61.7037	32.146	76.5932
FBgn0262699	fzr	400.382	-0.698388	0.231369	-3.0185	0.00254029	0.0935673	581.098	539.097	339.955	348.84	560.098	344.397
FBgn0034611	MFS16	72.5179	1.2758	0.423486	3.01261	0.00259016	0.0939725	34.1822	51.0599	63.2474	146.623	42.6211	104.935
FBgn0036239	Pop2	191.622	0.774692	0.257573	3.00766	0.00263266	0.0939725	149.876	166.242	241.695	300.577	158.059	271.136
FBgn0041188	Atx2	433.304	-1.15694	0.385033	-3.0048	0.00265759	0.0939725	823.002	561.659	245.083	372.666	692.331	308.875
FBgn0267821	da	250.887	-1.05168	0.349473	-3.00932	0.0026183	0.0939725	528.51	370.481	173.93	255.979	449.495	214.955
FBgn0036958	CG17233	147.801	-0.898101	0.299231	-3.00136	0.00268776	0.0940982	234.017	242.238	89.2239	163.118	238.127	126.171
FBgn0000117	arm	928.499	-0.504857	0.168735	-2.99201	0.00277149	0.0951454	1388.32	1250.37	783.815	1066.07	1319.35	924.942
FBgn0261793	Trf2	875.19	-0.972573	0.324869	-2.99374	0.00275581	0.0951454	941.326	921.453	461.932	486.91	931.389	474.421
FBgn0050499	Rpe	88.8331	1.18179	0.395799	2.98584	0.00282804	0.0954974	42.0704	53.4348	109.553	111.189	47.7526	110.371
FBgn0266696	Svil	280.112	-0.695564	0.23302	-2.985	0.00283575	0.0954974	294.493	298.047	151.342	211.381	296.27	181.361
FBgn0031489	CG17224	116.91	1.24573	0.418012	2.98013	0.00288125	0.0961142	57.8468	81.9333	217.977	121.575	69.8901	169.776
FBgn0004875	enc	607.749	-0.965232	0.325028	-2.96969	0.00298101	0.0974353	539.027	685.152	355.766	274.307	612.09	315.036
FBgn0025814	Mgstl	187.106	1.2166	0.409239	2.97284	0.00295057	0.0974353	55.2174	137.743	255.248	209.548	96.4802	232.398
FBgn0032781	RtcB	152.136	-1.24486	0.419514	-2.96738	0.00300352	0.0974353	202.464	151.992	89.2239	60.4819	177.228	74.8529
FBgn0028473	Non1	499.411	-0.699616	0.236115	-2.96303	0.00304631	0.0979249	744.12	579.47	345.602	462.472	661.795	404.037
FBgn0000008	a	99.9981	1.74483	0.590259	2.95603	0.00311624	0.0979346	10.5176	14.2493	31.6237	53.1507	12.3834	42.3872
FBgn0030876	CG6762	115.915	1.91879	0.648831	2.9573	0.00310343	0.0979346	44.6998	77.1836	413.367	56.2054	60.9417	234.786
FBgn0031049	Sec61gamma	277.39	1.05108	0.355731	2.9547	0.0031297	0.0979346	197.205	157.929	439.343	293.245	177.567	366.294
FBgn0027329	CCT6	1236.66	-0.953954	0.323653	-2.94746	0.00320395	0.0983493	1995.72	1724.16	992.758	926.778	1859.94	959.768
FBgn0033782	sug	425.715	-0.99995	0.339121	-2.94865	0.00319164	0.0983493	1149.05	955.889	524.05	527.231	1052.47	525.64
FBgn0038271	UQCR-C1	1126.07	-0.956703	0.324823	-2.9453	0.00322639	0.0983493	1288.41	1177.94	716.05	555.333	1233.17	635.692
FBgn0262116	RNASEK	276.933	1.00482	0.341739	2.94033	0.00327867	0.0990885	128.841	178.116	433.696	193.664	153.478	313.68
FBgn0030529	Clic	102.628	1.29246	0.440879	2.93155	0.00337276	0.101068	44.6998	59.372	134.401	125.24	52.0359	129.82
FBgn0003435	sm	1794.88	-0.920525	0.317265	-2.90143	0.00371458	0.107178	1582.9	2423.56	1112.48	1008.03	2003.23	1060.25
FBgn0034512	CG18067	211.935	1.6666	0.574633	2.90029	0.0037282	0.107178	84.1408	144.868	534.214	201.606	114.504	367.91
FBgn0039667	CG2010	151.421	-1.66979	0.574815	-2.90491	0.00367356	0.107178	168.282	249.362	67.765	64.1474	208.822	65.9562
FBgn0261276	Opa1	215.234	-0.888526	0.305909	-2.90454	0.00367791	0.107178	281.346	232.738	125.365	149.677	257.042	137.521
FBgn0265413	CG44325	115.052	1.5199	0.523978	2.90069	0.00372345	0.107178	39.441	52.2473	146.824	120.353	45.8442	133.589
FBgn0004638	drk	474.341	0.956186	0.330767	2.89082	0.00384241	0.108694	289.234	353.857	691.203	562.665	321.546	626.934
FBgn0034792	YME1L	129.49	-1.17782	0.407113	-2.89312	0.00381441	0.108694	199.834	172.179	81.318	82.4753	186.007	81.8966
FBgn0013733	shot	1562.32	-1.04874	0.364102	-2.88035	0.00397229	0.111476	1953.64	2300.07	1035.68	1021.47	2126.86	1028.57
FBgn0032949	Lamp1	375.268	1.24469	0.43503	2.86115	0.00422103	0.117524	160.393	229.176	454.026	475.302	194.785	464.664
FBgn0038853	RhoGAP93B	68.9039	-1.13727	0.398122	-2.85659	0.00428221	0.118296	126.211	102.12	56.4709	47.0414	114.166	51.7561
FBgn0026160	tna	719.711	-0.930144	0.325994	-2.85326	0.00432738	0.118617	1012.32	940.452	504.849	519.289	976.386	512.069
FBgn0038964	Nop56	344.894	-0.804393	0.282519	-2.84722	0.00441034	0.119961	373.375	390.668	217.977	219.934	382.021	218.956
FBgn0026238	gus	241.289	1.39814	0.492709	2.83766	0.00454461	0.12138	70.9938	181.678	337.696	341.509	126.336	339.602
FBgn0035020	CG13585	247.33	1.01279	0.357696	2.83142	0.00463414	0.12138	178.799	185.241	425.79	310.962	182.02	368.376
FBgn0037632	CCT7	1167.73	-1.0165	0.358772	-2.83328	0.00460726	0.12138	2116.67	1598.29	990.499	844.913	1857.48	917.706
FBgn0039581	Moca-cyp	85.4961	-1.27279	0.449155	-2.83375	0.00460057	0.12138	194.576	116.369	57.6003	69.0349	155.472	63.3176
FBgn0263346	smash	178.809	-1.08943	0.3837	-2.83929	0.00452145	0.12138	234.017	246.987	110.683	115.465	240.502	113.074
FBgn0051075	CG31075	287.114	1.10402	0.390615	2.82635	0.00470811	0.122411	194.576	286.173	630.215	412.376	240.374	521.296
FBgn0000250	cact	469.172	-0.827581	0.293109	-2.82346	0.00475082	0.12262	344.452	600.844	242.825	293.856	472.648	268.34
FBgn0029152	Mkrn1	153.498	1.04643	0.371898	2.81376	0.00489653	0.125465	65.735	97.37	187.483	157.619	81.5525	172.551
FBgn0029801	CG15771	351.874	-0.743349	0.265131	-2.80371	0.00505185	0.127595	131.47	147.242	76.8004	89.8064	139.356	83.3034
FBgn0058045	CG40045	263.196	0.947354	0.33773	2.80507	0.00503064	0.127595	131.47	178.116	376.096	230.32	154.793	303.208
FBgn0265180	CG44245	1259.31	-1.27815	0.456978	-2.79697	0.00515842	0.129363	1369.92	1464.11	669.744	499.739	1417.02	584.742
FBgn0013675	mt:CoII	17055.8	1.38857	0.498589	2.785	0.00535275	0.130533	5095.78	11952.8	34954.3	9697.26	8524.27	22325.8
FBgn0030061	CG1785	101.438	-0.999917	0.359011	-2.7852	0.00534954	0.130533	115.694	110.432	53.0826	59.26	113.063	56.1713
FBgn0034858	eIF2Bdelta	124.29	-0.889782	0.319389	-2.78589	0.00533805	0.130533	202.464	147.242	101.648	85.5299	174.853	93.5887
FBgn0042185	MCU	131.891	1.29132	0.462915	2.78954	0.0052783	0.130533	57.8468	99.7449	207.813	186.333	78.7959	197.073
FBgn0016977	spen	1203.33	-0.761727	0.273786	-2.78219	0.00539931	0.130767	1766.96	1522.3	852.71	1083.79	1644.63	968.248
FBgn0003885	alphaTub84D	331.716	-0.716477	0.258425	-2.77247	0.00556321	0.13382	539.027	404.917	262.025	307.297	471.972	284.661
FBgn0013678	mt:Cyt-b	13651.9	1.72978	0.624615	2.76935	0.00561676	0.134036	2290.21	8860.67	27395.1	9606.23	5575.44	18500.7
FBgn0015282	Rpt2	461.863	-0.622095	0.224837	-2.76688	0.00565964	0.134036	807.226	561.659	475.485	408.711	684.442	442.098
FBgn0039849	CG11334	131.896	-1.10059	0.39799	-2.76536	0.00568592	0.134036	178.799	201.865	99.3887	79.4206	190.332	89.4047
FBgn0264895	RapGAP1	248.576	-0.878313	0.317874	-2.76309	0.00572577	0.134082	449.628	254.112	186.354	191.831	351.87	189.093
FBgn0030090	fend	283.062	-1.02914	0.373567	-2.7549	0.00587108	0.13658	199.834	309.922	124.236	127.684	254.878	125.96
FBgn0265434	zip	596.999	-0.712923	0.259036	-2.75221	0.00591946	0.136805	899.255	821.708	438.214	607.873	860.482	523.044
FBgn0032196	CG5708	92.1877	1.31095	0.478004	2.74255	0.00609635	0.139979	21.0352	56.9971	110.683	95.3048	39.0161	102.994
FBgn0017566	ND-75	503.301	-0.879539	0.321101	-2.73914	0.00616005	0.140529	562.692	495.162	302.684	271.863	528.927	287.273
FBgn0030608	Lsd-2	190.555	0.753279	0.275351	2.73571	0.00622461	0.141091	120.952	173.366	309.46	200.384	147.159	254.922
FBgn0004832	Xpac	89.3147	1.27797	0.467605	2.73302	0.00627572	0.141344	28.9234	77.1836	164.895	106.301	53.0535	135.598
FBgn0085446	CG34417	742.156	-1.07806	0.395857	-2.72337	0.00646206	0.144619	812.485	1084.13	450.637	449.032	948.308	449.835
FBgn0262617	Nuak1	866.678	-1.24504	0.457591	-2.72086	0.00651118	0.144802	759.897	790.835	384.002	271.252	775.366	327.627
FBgn0261934	dikar	115.825	-1.22543	0.450872	-2.71791	0.00656959	0.145188	289.234	149.617	86.9651	98.3594	219.426	92.6623
FBgn0283521	lola	945.329	-0.699184	0.257598	-2.71424	0.00664278	0.145894	1083.31	1281.25	703.627	754.496	1182.28	729.061
FBgn0267348	LanB2	402.299	-0.789968	0.291342	-2.71148	0.00669833	0.146206	654.721	584.22	290.26	422.762	619.47	356.511
FBgn0259937	Nop60B	578.7	-0.898423	0.331648	-2.70897	0.00674933	0.146415	709.938	687.527	397.555	352.505	698.733	375.03
FBgn0020622	Pi3K21B	221.607	0.93047	0.343774	2.70663	0.006797	0.14655	76.2526	169.804	195.389	287.747	123.028	241.568
FBgn0004419	me31B	358.13	0.729635	0.269845	2.70391	0.00685297	0.146861	297.122	267.174	500.332	433.148	282.148	466.74
FBgn0020653	Trxr-1	436.571	-0.686073	0.254356	-2.69729	0.00699054	0.148331	599.503	575.908	346.731	382.441	587.706	364.586
FBgn0031145	Ntf-2	543.542	-0.659917	0.24507	-2.69277	0.00708605	0.148331	938.696	789.647	603.109	489.964	864.172	546.536
FBgn0033654	Sobp	66.6569	-1.57692	0.585647	-2.69262	0.00708937	0.148331	134.099	98.5575	38.4002	39.0994	116.328	38.7498
FBgn0264816	koko	107.78	-1.01856	0.37821	-2.69312	0.00707863	0.148331	147.246	85.4956	38.4002	71.4786	116.371	54.9394
FBgn0031558	CG16704	243.993	1.79375	0.667751	2.68626	0.00722566	0.150294	123.582	151.992	823.345	136.237	137.787	479.791
FBgn0014020	Rho1	1054.09	0.538535	0.201191	2.67674	0.0074342	0.153727	825.632	794.397	1158.78	1191.92	810.014	1175.35
FBgn0033000	CG14464	157.204	1.41093	0.52779	2.67329	0.00751122	0.154417	55.2174	92.6203	271.06	130.128	73.9188	200.594
FBgn0031907	CG5171	236.869	0.973789	0.364742	2.6698	0.00758953	0.155125	136.729	156.742	339.955	240.706	146.735	290.33
FBgn0035497	CG14995	292.464	-1.30311	0.488479	-2.66768	0.00763768	0.155212	76.2526	103.307	32.7531	40.3212	89.7799	36.5372
FBgn0020279	lig	521.487	-0.695083	0.261071	-2.66243	0.00775789	0.156754	765.156	790.835	425.79	533.951	777.995	479.871
FBgn0011710	Sep1	100.53	0.996531	0.375771	2.65196	0.0080025	0.160777	65.735	72.4338	106.165	169.227	69.0844	137.696
FBgn0284408	trol	456.614	-0.822165	0.310257	-2.64995	0.00805034	0.160825	502.216	528.411	297.037	286.525	515.313	291.781
FBgn0265356	tn	713.921	-1.21471	0.459529	-2.64338	0.00820832	0.16306	891.367	923.828	386.261	395.881	907.597	391.071
FBgn0013679	mt:ND1	5257.43	1.50253	0.570248	2.63487	0.00841703	0.164229	1251.59	2994.72	8942.72	3101.07	2123.16	6021.9
FBgn0028695	Rpn1	344.923	-0.618384	0.234382	-2.63836	0.00833086	0.164229	562.692	491.6	319.625	363.502	527.146	341.564
FBgn0033919	CG8547	198.37	-0.918099	0.348225	-2.63651	0.0083763	0.164229	404.928	288.548	146.824	216.268	346.738	181.546
FBgn0039590	CG10011	124.418	-0.819178	0.311293	-2.63154	0.0085	0.164229	186.687	174.554	96.0004	107.523	180.621	101.762
FBgn0040153	l(1)G0469	226.478	-0.928382	0.353284	-2.62786	0.00859232	0.164229	270.828	230.363	106.165	154.565	250.596	130.365
FBgn0263933	ebi	80.0487	-0.979062	0.372337	-2.6295	0.00855095	0.164229	144.617	104.495	64.3768	60.4819	124.556	62.4293
FBgn0267975	vib	188.616	-0.765531	0.291111	-2.62969	0.00854626	0.164229	260.311	262.424	142.307	164.34	261.367	153.323
FBgn0001961	Arpc1	249.403	0.783211	0.298667	2.62235	0.00873257	0.165384	118.323	224.426	336.566	270.641	171.375	303.604
FBgn0262508	CG43078	688.75	-1.4207	0.541875	-2.62182	0.00874628	0.165384	215.611	350.295	112.942	99.5812	282.953	106.261
FBgn0003093	Pkc98E	397.118	-0.799347	0.306222	-2.61035	0.00904488	0.167765	531.139	365.731	215.719	294.467	448.435	255.093
FBgn0011661	Moe	4571.16	-1.0135	0.388356	-2.60971	0.00906195	0.167765	5516.48	5899.2	2898.08	2757.12	5707.84	2827.6
FBgn0030973	CG7332	180.186	-0.625658	0.23963	-2.61094	0.00902949	0.167765	294.493	236.3	182.966	158.841	265.397	170.903
FBgn0082598	akirin	1128.2	-0.449989	0.172168	-2.61367	0.00895767	0.167765	1664.41	1280.06	1028.9	1115.55	1472.24	1072.23
FBgn0016756	Usp47	1167.85	-1.15259	0.444231	-2.59458	0.00947068	0.172287	1672.3	1731.29	828.992	702.567	1701.79	765.78
FBgn0026380	Prosbeta3	463.959	0.604638	0.232889	2.59625	0.00942481	0.172287	270.828	403.729	592.944	450.865	337.279	521.904
FBgn0032208	Ufd4	208.442	-0.896584	0.345707	-2.59348	0.00950113	0.172287	318.158	246.987	127.624	172.893	282.572	150.258
FBgn0039163	CG5515	91.8602	1.19898	0.462106	2.5946	0.00947001	0.172287	44.6998	43.9353	131.012	73.9223	44.3175	102.467
FBgn0263260	sel	71.312	1.2002	0.463789	2.58782	0.00965848	0.174247	42.0704	47.4976	106.165	101.414	44.784	103.79
FBgn0000575	emc	552.024	0.95279	0.368549	2.58525	0.00973097	0.174663	294.493	336.045	546.638	675.686	315.269	611.162
FBgn0003279	RpL4	4783.79	-0.524343	0.203194	-2.58051	0.00986552	0.176184	6073.92	5865.95	4192.4	4108.49	5969.93	4150.44
FBgn0032218	CG5381	158.628	-1.39088	0.539729	-2.57699	0.00996642	0.177044	120.952	121.119	64.3768	29.3245	121.036	46.8507
FBgn0261403	sxc	215.056	0.901468	0.350037	2.57535	0.0100138	0.177044	115.694	119.931	229.272	211.992	117.813	220.632
FBgn0028506	CG4455	154.596	1.24837	0.485249	2.57264	0.0100926	0.177332	84.1408	77.1836	123.106	257.201	80.6622	190.154
FBgn0283535	Vha26	431.823	0.741451	0.288351	2.57135	0.0101304	0.177332	299.752	268.361	490.167	456.974	284.056	473.571
FBgn0040512	zetaCOP	67.0073	1.21304	0.474555	2.55616	0.0105835	0.184351	55.2174	29.686	88.0945	100.192	42.4517	94.1434
FBgn0013674	mt:CoI	66522.9	1.61749	0.633406	2.55365	0.0106602	0.184777	10543.9	44639.4	124147	45194.6	27591.7	84670.6
FBgn0015778	rin	1567.07	-0.683949	0.268302	-2.54917	0.0107979	0.186134	1956.27	1933.15	1140.71	1279.28	1944.71	1210
FBgn0025637	SkpA	749.309	0.647934	0.254322	2.54769	0.0108438	0.186134	539.027	629.343	1103.44	736.168	584.185	919.804
FBgn0034258	eIF3c	935.457	-0.451558	0.177909	-2.53814	0.0111443	0.189454	1177.97	1126.88	866.263	818.643	1152.43	842.453
FBgn0040732	CG16926	784.588	1.26493	0.49808	2.53961	0.0110975	0.189454	654.721	577.096	2252.06	708.676	615.908	1480.37
FBgn0040503	CG7763	102.719	1.56718	0.618901	2.53219	0.0113352	0.191777	36.8116	64.1217	216.848	89.1955	50.4667	153.022
FBgn0027493	AdSS	149.091	0.746943	0.296202	2.52174	0.0116778	0.196631	94.6584	100.932	161.507	168.005	97.7954	164.756
FBgn0029778	RhoGAP5A	165.78	-0.929416	0.369379	-2.51616	0.0118641	0.196955	289.234	295.672	151.342	155.787	292.453	153.564
FBgn0030105	CG15369	183.547	1.65099	0.65602	2.51668	0.0118466	0.196955	68.3644	134.181	536.473	108.134	101.273	322.304
FBgn0031952	cdc14	74.1763	-1.13253	0.449542	-2.51929	0.0117593	0.196955	76.2526	105.682	47.4355	37.2666	90.9674	42.3511
FBgn0010747	Srp54k	63.7159	1.01839	0.405436	2.51184	0.0120103	0.197528	47.3292	34.4357	83.5769	77.5878	40.8825	80.5824
FBgn0266448	CG45078	127.934	-1.65668	0.65953	-2.5119	0.0120082	0.197528	173.54	226.801	54.212	72.7004	200.171	63.4562
FBgn0035600	Cyt-c1	1103.51	-0.855016	0.340663	-2.50986	0.0120779	0.19772	1233.19	1023.57	783.815	464.916	1128.38	624.366
FBgn0025571	SF1	217.61	-0.946453	0.378035	-2.50362	0.0122932	0.1999	441.739	314.671	181.836	208.326	378.205	195.081
FBgn0027866	CG9776	146.446	-0.938209	0.375602	-2.49788	0.0124937	0.1999	173.54	237.488	90.3534	124.629	205.514	107.491
FBgn0036537	CG18081	241.326	0.967564	0.387288	2.49831	0.0124789	0.1999	123.582	168.616	378.355	200.995	146.099	289.675
FBgn0051715	CG31715	83.7899	0.98276	0.392715	2.50248	0.0123327	0.1999	55.2174	42.7478	109.553	81.2534	48.9826	95.4034
FBgn0261786	mi	67.7613	-1.20043	0.480048	-2.50064	0.0123969	0.1999	99.9172	91.4328	53.0826	31.1573	95.675	42.12
FBgn0011211	blw	4194.03	-0.789577	0.317533	-2.4866	0.012897	0.202084	4225.45	3865.12	2512.95	2167.57	4045.28	2340.26
FBgn0026144	CBP	186.714	0.851252	0.342566	2.48493	0.0129578	0.202084	139.358	187.615	267.672	327.457	163.487	297.565
FBgn0039229	Saf-B	207.684	-1.24434	0.499465	-2.49135	0.0127258	0.202084	436.481	352.669	151.342	180.835	394.575	166.088
FBgn0039889	Arl4	122.123	0.94767	0.38076	2.48889	0.0128143	0.202084	68.3644	80.7459	145.695	144.79	74.5551	145.242
FBgn0040383	CG5254	147.292	1.01056	0.406745	2.48451	0.0129731	0.202084	65.735	109.244	208.942	152.732	87.4897	180.837
FBgn0262127	kibra	408.519	-0.945992	0.380536	-2.48595	0.0129207	0.202084	386.522	388.293	111.812	287.136	387.407	199.474
FBgn0052425	CG32425	246.999	-0.762187	0.307693	-2.4771	0.0132455	0.205421	341.822	324.171	186.354	205.272	332.997	195.813
FBgn0038244	CG7987	110.24	-0.933759	0.377258	-2.47512	0.0133192	0.205663	97.2878	159.117	77.9298	59.8709	128.202	68.9004
FBgn0011640	lark	1028.46	-0.726365	0.293799	-2.47232	0.0134239	0.206377	1856.36	1586.42	989.369	1089.28	1721.39	1039.33
FBgn0265045	Strn-Mlck	509.751	-1.33503	0.541159	-2.46699	0.0136255	0.208376	699.421	1027.14	386.261	299.355	863.278	342.808
FBgn0261710	nocte	187.639	-0.740728	0.300404	-2.46577	0.0136717	0.208376	268.199	241.05	123.106	178.391	254.625	150.749
FBgn0030556	mRNA-cap	144.854	-0.840513	0.341327	-2.46249	0.0137976	0.209391	236.646	223.239	92.6122	161.285	229.942	126.949
FBgn0001142	Gs1	408.271	0.888915	0.361958	2.45585	0.0140552	0.210362	315.528	412.041	891.11	464.305	363.785	677.708
FBgn0030354	Upf1	86.6447	-1.08964	0.443763	-2.45546	0.0140704	0.210362	115.694	138.93	53.0826	66.5911	127.312	59.8369
FBgn0035638	Tektin-C	92.4225	-1.09017	0.444386	-2.4532	0.014159	0.210362	136.729	143.68	63.2474	68.4239	140.205	65.8356
FBgn0043841	vir-1	458.588	1.03316	0.420915	2.45456	0.0141058	0.210362	362.857	406.104	967.91	609.095	384.481	788.503
FBgn0267976	Tim23	579.021	0.919273	0.374509	2.45461	0.0141037	0.210362	310.269	340.795	816.569	419.097	325.532	617.833
FBgn0002643	mam	330.959	-0.727342	0.297225	-2.44711	0.0144006	0.213057	370.746	393.042	194.26	265.754	381.894	230.007
FBgn0026749	Yippee	136.907	-0.757396	0.310002	-2.4432	0.0145578	0.213189	283.975	186.428	153.601	122.186	235.202	137.893
FBgn0038400	CG5903	622.924	-0.727929	0.29804	-2.44239	0.0145904	0.213189	688.903	587.782	467.579	304.242	638.343	385.91
FBgn0040765	luna	126.032	-0.93775	0.383481	-2.44536	0.0144707	0.213189	123.582	166.242	60.9885	90.4173	144.912	75.7029
FBgn0004868	Gdi	833.335	-0.591015	0.242365	-2.43853	0.0147472	0.213783	1280.52	936.89	651.674	813.145	1108.7	732.409
FBgn0262559	Mdh2	1395.93	-0.715338	0.293362	-2.43841	0.014752	0.213783	1277.89	1079.38	857.228	579.16	1178.64	718.194
FBgn0263391	hts	796.726	-0.794678	0.327969	-2.42303	0.0153918	0.216043	376.004	458.352	180.707	299.355	417.178	240.031
FBgn0004179	Csp	178.389	0.778621	0.32216	2.41687	0.0156545	0.216043	115.694	131.806	207.813	219.323	123.75	213.568
FBgn0010551	Phb2	1308.87	-0.846999	0.350056	-2.41961	0.0155373	0.216043	1664.41	1410.68	1053.75	656.747	1537.54	855.247
FBgn0010905	Spn	286.734	-0.867294	0.360047	-2.40883	0.0160036	0.216043	415.445	331.296	128.754	276.139	373.37	202.446
FBgn0011297	Alg3	100.691	-0.994931	0.410122	-2.42594	0.0152687	0.216043	118.323	148.43	82.4474	53.7617	133.376	68.1045
FBgn0014859	Hr38	450.039	-2.74552	1.14179	-2.40458	0.016191	0.216043	34.1822	20.1865	0	7.33113	27.1843	3.66557
FBgn0027339	jim	1370.71	-0.676999	0.280777	-2.41117	0.0159016	0.216043	1351.51	1380.99	895.628	814.367	1366.25	854.997
FBgn0028671	Vha100-1	83.0577	-0.844551	0.351045	-2.40582	0.0161361	0.216043	152.505	127.056	73.4121	80.6425	139.781	77.0273
FBgn0031268	cold	75.6529	1.66662	0.690654	2.4131	0.0158175	0.216043	23.6646	39.1855	65.5062	137.459	31.4251	101.482
FBgn0031673	CG31650	188.634	-0.6322	0.262755	-2.40604	0.0161264	0.216043	160.393	154.367	106.165	97.1375	157.38	101.651
FBgn0031951	r2d2	125.537	0.746047	0.309153	2.4132	0.0158133	0.216043	92.029	98.5575	155.86	164.951	95.2932	160.405
FBgn0034443	cer	386.984	1.18142	0.490927	2.40651	0.0161058	0.216043	241.905	292.11	962.263	254.146	267.007	608.205
FBgn0035424	Larp4B	469.895	-0.690122	0.286791	-2.40636	0.0161125	0.216043	560.062	518.911	273.319	392.216	539.487	332.767
FBgn0036030	CG6767	1872.54	-0.869356	0.360147	-2.4139	0.015783	0.216043	2298.1	2181.33	1630.88	823.531	2239.71	1227.2
FBgn0036451	CG9425	450.033	-0.670951	0.278881	-2.40587	0.016134	0.216043	539.027	580.658	312.849	389.772	559.843	351.31
FBgn0036932	CG14184	63.5537	1.16376	0.480096	2.42401	0.0153504	0.216043	13.147	39.1855	79.0592	50.0961	26.1663	64.5776
FBgn0087007	bbg	906.511	-1.13655	0.471142	-2.41234	0.0158506	0.216043	770.414	979.637	362.543	433.759	875.026	398.151
FBgn0260439	Pp2A-29B	438.931	-0.484708	0.199672	-2.42752	0.0152025	0.216043	468.033	511.786	332.049	369	489.91	350.525
FBgn0262117	IntS3	121.725	0.792214	0.32818	2.41396	0.01578	0.216043	42.0704	109.244	137.789	141.124	75.6574	139.457
FBgn0266599	Hsc70-4	3394.8	-0.570057	0.235074	-2.42501	0.015308	0.216043	4341.14	4194.04	2945.52	2803.55	4267.59	2874.53
FBgn0285937	Rab1	348.907	0.721136	0.299292	2.40948	0.0159755	0.216043	249.793	282.611	430.308	450.254	266.202	440.281
FBgn0004926	eIF2beta	664.115	-0.700267	0.291559	-2.4018	0.0163146	0.216874	878.22	735.025	572.614	420.318	806.622	496.466
FBgn0001297	kay	467.971	-1.00236	0.418277	-2.3964	0.0165571	0.217127	681.015	644.78	365.931	296.3	662.897	331.116
FBgn0027836	Dgp-1	68.4692	-1.0117	0.422501	-2.39455	0.0166407	0.217127	99.9172	92.6203	44.0473	50.707	96.2688	47.3771
FBgn0028686	Rpt3	350.791	-0.469307	0.195762	-2.39733	0.0165151	0.217127	436.481	498.725	346.731	332.956	467.603	339.843
FBgn0039239	CG13641	148.897	1.5719	0.6561	2.39582	0.016583	0.217127	52.588	117.556	412.237	102.636	85.0723	257.437
FBgn0039555	mRpS22	223.896	-0.851678	0.355597	-2.39507	0.0166174	0.217127	215.611	232.738	119.718	128.906	224.174	124.312
FBgn0262160	CG9932	268.904	-0.923452	0.386114	-2.39165	0.0167727	0.218045	181.429	318.234	147.954	119.131	249.831	133.542
FBgn0030160	CG9691	82.9031	1.23204	0.51551	2.38995	0.0168508	0.218258	52.588	55.8096	153.601	102.636	54.1988	128.118
FBgn0003975	vg	404.592	-1.22108	0.513421	-2.37832	0.0173918	0.222013	331.305	427.478	147.954	177.78	379.391	162.867
FBgn0010039	GstD3	83.6172	1.13205	0.475824	2.37913	0.0173536	0.222013	55.2174	60.5594	160.377	95.9157	57.8884	128.146
FBgn0039252	CG11771	64.5814	-0.937178	0.393664	-2.38065	0.017282	0.222013	68.3644	61.7468	42.9178	26.2699	65.0556	34.5939
FBgn0041710	yellow-f	76.5842	1.29125	0.542843	2.37868	0.0173747	0.222013	31.5528	43.9353	119.718	69.6458	37.744	94.682
FBgn0004587	B52	776.304	-0.561195	0.237491	-2.36302	0.0181267	0.222556	1125.38	984.387	678.78	747.776	1054.89	713.278
FBgn0013684	mt:ND5	2639.55	1.9185	0.809621	2.36963	0.0178058	0.222556	278.716	1483.11	4833.9	1838.89	880.914	3336.4
FBgn0023514	CG14805	89.0297	-1.00276	0.423402	-2.36834	0.0178683	0.222556	131.47	156.742	59.8591	83.6971	144.106	71.7781
FBgn0029113	Uba2	279.766	-0.536973	0.226314	-2.37269	0.0176589	0.222556	470.663	358.607	288.001	278.583	414.635	283.292
FBgn0035713	velo	113.393	-1.03389	0.436958	-2.3661	0.0179764	0.222556	199.834	159.117	60.9885	111.8	179.476	86.3942
FBgn0039560	BOD1	73.5744	-0.8858	0.374491	-2.36534	0.0180135	0.222556	149.876	92.6203	64.3768	64.1474	121.248	64.2621
FBgn0039924	PIP4K	261.602	1.23457	0.520011	2.37413	0.0175905	0.222556	126.211	141.305	347.86	283.471	133.758	315.665
FBgn0051146	Nlg1	66.8869	-1.45563	0.615044	-2.36671	0.0179472	0.222556	65.735	143.68	35.0119	42.154	104.708	38.583
FBgn0051997	CG31997	98.2385	1.48048	0.623862	2.37309	0.0176402	0.222556	65.735	46.3101	101.648	206.494	56.0226	154.071
FBgn0260744	Tango9	165.347	0.873671	0.369147	2.36673	0.017946	0.222556	99.9172	109.244	203.295	182.057	104.581	192.676
FBgn0262562	CG43102	139.356	-1.09064	0.461455	-2.36349	0.0181038	0.222556	84.1408	163.867	51.9532	65.9802	124.004	58.9667
FBgn0033019	CG10395	117.234	1.26184	0.535695	2.35553	0.0184964	0.224754	60.4762	66.4966	194.26	112.411	63.4864	153.335
FBgn0036685	CG6664	158.341	-0.632522	0.268518	-2.3556	0.0184928	0.224754	186.687	280.236	150.212	155.787	233.462	153
FBgn0053526	PNUTS	271.189	-0.691347	0.293468	-2.35578	0.0184838	0.224754	336.563	325.358	184.095	224.211	330.961	204.153
FBgn0025936	Eph	168.063	0.866047	0.368622	2.34942	0.0188026	0.224881	123.582	90.2454	156.989	225.432	106.914	191.211
FBgn0030502	tth	101.144	0.793506	0.337809	2.34898	0.0188249	0.224881	70.9938	94.9951	171.671	123.407	82.9945	147.539
FBgn0031992	Acbp1	688.67	0.858961	0.365623	2.34931	0.0188083	0.224881	365.487	499.912	1153.13	426.428	432.699	789.781
FBgn0259680	Pkcdelta	363.481	-1.46214	0.621148	-2.35392	0.0185764	0.224881	323.416	546.222	201.036	116.076	434.819	158.556
FBgn0267398	Yeti	296.756	0.694242	0.295192	2.35183	0.0186812	0.224881	270.828	301.61	592.944	339.676	286.219	466.31
FBgn0086779	step	124.365	-0.856944	0.365184	-2.34661	0.018945	0.225554	144.617	148.43	94.871	68.4239	146.523	81.6475
FBgn0037644	CG11964	76.9062	-0.762599	0.325223	-2.34485	0.0190347	0.225861	115.694	110.432	59.8591	72.0895	113.063	65.9743
FBgn0050460	CG30460	273.031	-1.12285	0.479147	-2.34343	0.0191073	0.225964	318.158	290.923	181.836	98.9703	304.54	140.403
FBgn0040099	lectin-28C	184.559	1.51363	0.647018	2.33939	0.0193152	0.227662	113.064	110.432	373.837	264.532	111.748	319.184
FBgn0029506	Tsp42Ee	431.594	0.978529	0.41865	2.33734	0.0194213	0.228152	173.54	328.921	455.155	544.337	251.231	499.746
FBgn0028509	CenG1A	73.8491	1.21067	0.518359	2.33557	0.0195134	0.228475	18.4058	26.1237	51.9532	54.3726	22.2647	53.1629
FBgn0011655	Med	172.817	-0.793821	0.340295	-2.33274	0.0196617	0.229149	320.787	251.737	156.989	171.06	286.262	164.024
FBgn0050115	GEFmeso	78.4607	-1.14956	0.492949	-2.332	0.0197006	0.229149	186.687	97.37	66.6356	59.8709	142.029	63.2533
FBgn0000566	Eip55E	216.988	0.917311	0.394278	2.32656	0.0199888	0.229517	134.099	140.118	338.825	182.057	137.109	260.441
FBgn0002736	mago	260.293	0.760387	0.327493	2.32184	0.0202415	0.229517	152.505	229.176	437.084	221.767	190.841	329.426
FBgn0003886	alphaTub85E	6439.16	-0.929707	0.401326	-2.31659	0.0205262	0.229517	10817.4	10063.5	6330.38	4632.06	10440.5	5481.22
FBgn0004657	mys	375.246	-0.637553	0.274506	-2.32255	0.0202034	0.229517	470.663	496.35	281.225	339.676	483.506	310.45
FBgn0011642	Zyx	170.64	1.13343	0.488386	2.32076	0.0202998	0.229517	65.735	116.369	216.848	189.999	91.052	203.423
FBgn0014141	cher	118.129	1.09867	0.47445	2.31567	0.0205761	0.229517	28.9234	26.1237	55.3414	61.0928	27.5235	58.2171
FBgn0019890	Smg5	173.251	-0.679592	0.293452	-2.31586	0.0205661	0.229517	257.681	175.741	118.589	146.623	216.711	132.606
FBgn0023172	RhoGEF2	89.6337	-0.973635	0.419451	-2.32121	0.0202754	0.229517	186.687	122.306	70.0239	84.919	154.497	77.4714
FBgn0030872	Ucp4A	68.5365	-1.08835	0.468767	-2.32174	0.0202471	0.229517	39.441	89.058	39.5296	24.4371	64.2495	31.9834
FBgn0035978	UGP	104.315	0.816886	0.352607	2.31671	0.0205197	0.229517	68.3644	84.3082	145.695	127.684	76.3363	136.689
FBgn0040532	CG8369	129.409	1.67466	0.721909	2.31977	0.0203535	0.229517	63.1056	100.932	473.226	56.2054	82.019	264.716
FBgn0086442	mib2	243.534	-0.87624	0.377778	-2.31946	0.0203703	0.229517	223.499	261.237	103.906	159.452	242.368	131.679
FBgn0266521	stai	773.912	0.968653	0.41676	2.32425	0.0201121	0.229517	567.951	558.096	904.663	1297.61	563.024	1101.14
FBgn0013680	mt:ND2	743.586	1.58492	0.687407	2.30565	0.0211305	0.234649	113.064	704.152	1756.24	709.898	408.608	1233.07
FBgn0029176	eEF1gamma	1620.46	-0.49038	0.21275	-2.30496	0.0211689	0.234649	1953.64	1746.72	1446.78	1187.03	1850.18	1316.91
FBgn0011286	RyR	345.507	-1.28327	0.557614	-2.30136	0.021371	0.23615	402.298	575.908	263.154	140.513	489.103	201.834
FBgn0265276	l(3)neo38	687.526	-0.755473	0.328728	-2.29817	0.0215519	0.237406	1135.9	1015.26	545.508	726.393	1075.58	635.951
FBgn0005674	GluProRS	360.729	-0.810872	0.353105	-2.2964	0.0216529	0.237778	507.474	384.73	246.213	260.255	446.102	253.234
FBgn0053207	pxb	157.405	-1.14901	0.500838	-2.29418	0.0217804	0.238439	199.834	180.491	91.4828	80.0316	190.163	85.7572
FBgn0032042	CG13398	71.6635	0.943774	0.412063	2.29036	0.0220002	0.240101	47.3292	36.8106	93.7416	65.9802	42.0699	79.8609
FBgn0033191	CG1598	132.431	-0.622253	0.271976	-2.2879	0.0221435	0.240921	205.093	192.365	149.083	110.578	198.729	129.83
FBgn0010786	l(3)02640	78.6162	-1.03102	0.451135	-2.28539	0.0222902	0.241069	52.588	55.8096	22.5883	29.9355	54.1988	26.2619
FBgn0035024	CG11414	109.296	-0.721726	0.316217	-2.28238	0.022467	0.241069	136.729	167.429	89.2239	96.5266	152.079	92.8753
FBgn0036566	ClC-c	73.5947	0.994585	0.435534	2.2836	0.0223952	0.241069	36.8116	54.6222	101.648	86.1408	45.7169	93.8942
FBgn0260987	vtd	199.648	0.952179	0.417283	2.28185	0.022498	0.241069	63.1056	131.806	202.166	185.722	97.4557	193.944
FBgn0262579	Ect4	133.901	-0.706527	0.309293	-2.28433	0.0223522	0.241069	123.582	185.241	103.906	89.8064	154.411	96.8564
FBgn0013685	mt:ND6	165.715	1.08433	0.475879	2.27859	0.0226916	0.242409	65.735	147.242	341.084	122.797	106.489	231.94
FBgn0015777	nrv2	471.924	0.805151	0.353908	2.27503	0.0229043	0.243434	118.323	187.615	231.53	310.351	152.969	270.941
FBgn0033476	oys	182.881	0.710708	0.312443	2.27468	0.0229252	0.243434	86.7702	149.617	161.507	234.596	118.194	198.051
FBgn0000565	Eip71CD	71.8117	0.797112	0.352831	2.25919	0.0238717	0.246128	49.9586	51.0599	107.295	70.8676	50.5093	89.0811
FBgn0022986	qkr58E-1	219.706	-0.637017	0.282113	-2.25802	0.0239446	0.246128	407.557	298.047	204.424	244.371	352.802	224.398
FBgn0030993	Mec2	117.428	1.41907	0.62708	2.26298	0.0236368	0.246128	31.5528	90.2454	166.024	168.616	60.8991	167.32
FBgn0031020	Naa15-16	272.716	-1.04013	0.45945	-2.26386	0.0235826	0.246128	378.634	447.665	192.001	210.159	413.149	201.08
FBgn0031857	LUBEL	500.219	-1.09311	0.482876	-2.26374	0.0235899	0.246128	681.015	656.654	369.319	258.422	668.834	313.871
FBgn0033137	Tsp42Ep	254.172	1.11581	0.494017	2.25866	0.0239048	0.246128	207.723	218.489	649.415	276.75	213.106	463.083
FBgn0033402	Myd88	412.46	-0.91222	0.402867	-2.26432	0.0235544	0.246128	433.851	493.975	263.154	230.931	463.913	247.042
FBgn0036908	TORIP	127.868	0.724633	0.320731	2.25932	0.0238638	0.246128	81.5114	89.058	173.93	112.411	85.2847	143.17
FBgn0039302	Nup358	203.6	-0.68561	0.302536	-2.26621	0.0234385	0.246128	302.381	244.613	141.177	194.886	273.497	168.032
FBgn0040233	cana	162.033	-1.05185	0.465097	-2.26157	0.0237241	0.246128	252.422	311.109	124.236	147.845	281.766	136.04
FBgn0267791	HnRNP-K	273.866	-0.782032	0.345051	-2.26642	0.0234254	0.246128	525.88	360.982	234.919	277.361	443.431	256.14
FBgn0033434	CG1902	110.374	0.719739	0.319024	2.25606	0.0240667	0.246667	102.547	64.1217	132.142	132.571	83.3342	132.357
FBgn0264695	Mhc	4545.91	-1.39271	0.621857	-2.23959	0.0251174	0.250184	4622.49	5234.23	2152.67	1601.85	4928.36	1877.26
FBgn0003141	pr	134.139	0.838036	0.373715	2.24244	0.0249327	0.250184	84.1408	106.87	230.401	117.909	95.5052	174.155
FBgn0003514	sqh	414.071	0.524836	0.233944	2.24343	0.0248694	0.250184	226.128	292.11	369.319	384.885	259.119	377.102
FBgn0010052	Jhe	218.13	0.880473	0.393018	2.24029	0.0250721	0.250184	141.988	211.364	419.014	240.095	176.676	329.554
FBgn0020767	Spred	91.6172	1.00368	0.446501	2.24788	0.0245836	0.250184	34.1822	56.9971	98.2593	91.0283	45.5896	94.6438
FBgn0027080	TyrRS	254.804	-0.486241	0.216607	-2.24481	0.0247802	0.250184	302.381	262.424	197.648	202.217	282.403	199.933
FBgn0029990	CG2233	2115.45	1.01406	0.452602	2.2405	0.0250584	0.250184	1409.36	1835.78	4792.12	1768.03	1622.57	3280.07
FBgn0033741	CG8545	101.08	-0.923985	0.412037	-2.24248	0.0249303	0.250184	113.064	109.244	47.4355	68.4239	111.154	57.9297
FBgn0039685	Obp99b	4784.53	1.41242	0.628706	2.24655	0.0246691	0.250184	2884.45	3891.24	15078.8	2961.78	3387.85	9020.31
FBgn0262880	CG43235	118.189	1.35083	0.602905	2.24053	0.0250563	0.250184	60.4762	58.1845	204.424	98.9703	59.3304	151.697
FBgn0041191	Rheb	93.5703	0.76642	0.342671	2.2366	0.0253122	0.251415	49.9586	71.2464	100.518	111.189	60.6025	105.853
FBgn0022959	yps	2629.51	-0.555421	0.248965	-2.23092	0.0256863	0.254417	4088.72	3431.7	2700.44	2415	3760.21	2557.72
FBgn0030328	Amun	358.585	-0.606271	0.271951	-2.22934	0.0257915	0.254704	586.356	407.292	275.578	370.222	496.824	322.9
FBgn0052626	AMPdeam	73.7221	1.22711	0.550688	2.22832	0.0258593	0.254704	23.6646	54.6222	98.2593	92.861	39.1434	95.5602
FBgn0004373	fwd	275.202	-0.823226	0.370187	-2.22381	0.0261612	0.256961	281.346	149.617	105.036	133.793	215.482	119.414
FBgn0039737	CG7920	1823.28	-0.637161	0.28668	-2.22255	0.026246	0.25708	2213.96	2062.58	1537.14	1213.3	2138.27	1375.22
FBgn0041789	Pax	144.309	0.727842	0.32797	2.21923	0.026471	0.258567	68.3644	135.368	184.095	166.783	101.866	175.439
FBgn0031097	obst-A	207.296	1.04667	0.472058	2.21725	0.0266057	0.259167	123.582	142.493	143.436	405.656	133.037	274.546
FBgn0023000	mth	117.415	1.06844	0.48221	2.21573	0.0267103	0.259472	81.5114	94.9951	158.118	213.214	88.2533	185.666
FBgn0026404	Dronc	96.2048	1.02008	0.460775	2.21385	0.0268393	0.260011	44.6998	72.4338	127.624	116.076	58.5668	121.85
FBgn0026084	cib	1330.71	0.933507	0.422013	2.21203	0.0269643	0.260508	967.62	884.642	2010.36	1526.71	926.131	1768.54
FBgn0033234	MFS12	70.9879	1.09074	0.494328	2.20652	0.0273478	0.263234	52.588	30.8734	74.5415	96.5266	41.7307	85.5341
FBgn0037447	Neurochondrin	986.968	-1.01001	0.457882	-2.20584	0.0273954	0.263234	804.597	1017.64	537.603	369	911.116	453.301
FBgn0003651	svp	224.451	-1.10343	0.50092	-2.20281	0.0276084	0.263846	323.416	403.729	188.613	150.899	363.573	169.756
FBgn0004867	RpS2	5122.26	-0.607239	0.275568	-2.20359	0.0275532	0.263846	6912.69	5889.7	4783.08	3620.97	6401.2	4202.03
FBgn0010263	Rbp9	589.612	-0.733757	0.33339	-2.2009	0.0277432	0.26442	349.71	453.602	259.766	226.043	401.656	242.905
FBgn0025621	CG16989	64.9093	-0.962013	0.4379	-2.19688	0.0280292	0.264472	144.617	97.37	54.212	67.813	120.994	61.0125
FBgn0025742	mtm	114.81	-0.643054	0.292584	-2.19784	0.0279603	0.264472	212.981	166.242	109.553	129.517	189.611	119.535
FBgn0050021	metro	145.479	-1.0687	0.486425	-2.19705	0.0280168	0.264472	270.828	235.113	124.236	116.687	252.971	120.462
FBgn0267534	asRNA:CR45874	92.11	-1.06955	0.48691	-2.19662	0.0280478	0.264472	291.863	134.181	138.918	63.5365	213.022	101.227
FBgn0000339	cni	122.08	0.910647	0.415377	2.19234	0.0283551	0.265889	65.735	84.3082	177.318	109.967	75.0216	143.643
FBgn0000562	egl	92.4921	-0.975493	0.445993	-2.18724	0.0287252	0.265889	149.876	130.618	50.8238	89.8064	140.247	70.3151
FBgn0029629	eIF3g1	667.944	-0.593301	0.27151	-2.18519	0.0288748	0.265889	1051.76	792.022	650.544	568.774	921.891	609.659
FBgn0037624	CG8223	225.128	-0.776257	0.354438	-2.19011	0.0285164	0.265889	410.187	270.736	131.012	260.866	340.461	195.939
FBgn0039970	CG17508	250.236	0.8162	0.372694	2.19	0.0285242	0.265889	160.393	165.054	329.79	244.982	162.724	287.386
FBgn0040007	RpL38	3607	0.754795	0.344247	2.1926	0.0283364	0.265889	2156.11	2310.76	5176.12	2366.12	2233.43	3771.12
FBgn0086768	Pcmt	330.419	0.679909	0.311115	2.1854	0.0288598	0.265889	231.387	260.049	487.908	304.853	245.718	396.381
FBgn0262952	mt:ND4	5774.73	1.62462	0.743401	2.18539	0.0288602	0.265889	691.532	3529.07	9226.21	3800.58	2110.3	6513.4
FBgn0264357	SNF4Agamma	289.941	-0.588551	0.26925	-2.18589	0.0288237	0.265889	333.934	341.983	243.954	207.105	337.958	225.529
FBgn0010488	NAT1	868.602	-0.443081	0.203361	-2.17879	0.0293471	0.268849	1259.48	951.139	718.309	897.453	1105.31	807.881
FBgn0028402	Sin	64.9771	-0.986717	0.452877	-2.17878	0.0293483	0.268849	39.441	92.6203	33.8825	35.4338	66.0306	34.6582
FBgn0035578	CG13707	195.261	1.0989	0.505875	2.17227	0.0298352	0.2719	115.694	208.989	450.637	252.924	162.341	351.781
FBgn0262519	Mi-2	150.865	-0.9071	0.417497	-2.17271	0.029802	0.2719	305.01	233.926	125.365	160.063	269.468	142.714
FBgn0260659	CG42542	92.3444	0.815557	0.375702	2.17075	0.0299497	0.272242	47.3292	73.6212	120.848	99.5812	60.4752	110.214
FBgn0026326	Mad1	77.2277	-0.85818	0.395766	-2.1684	0.0301282	0.272323	168.282	112.807	63.2474	88.5845	140.544	75.9159
FBgn0033886	Rpn13	257.804	-0.491494	0.226975	-2.16541	0.0303563	0.272323	360.228	254.112	198.777	229.709	307.17	214.243
FBgn0039875	sip3	113.709	-0.980472	0.452929	-2.16474	0.0304079	0.272323	165.652	176.928	59.8591	112.411	171.29	86.1349
FBgn0040064	yip2	302.862	0.582268	0.26868	2.16714	0.0302239	0.272323	376.004	279.048	608.756	367.168	327.526	487.962
FBgn0063670	CG40228	107.238	1.08664	0.501516	2.16672	0.0302564	0.272323	68.3644	74.8087	207.813	98.9703	71.5866	153.392
FBgn0264834	lncRNA:CR44042	90.8513	1.02999	0.475841	2.16457	0.0304207	0.272323	120.952	55.8096	187.483	164.34	88.381	175.911
FBgn0035397	CG11486	458.459	-0.566401	0.262551	-2.1573	0.0309827	0.275957	807.226	610.344	422.402	529.064	708.785	475.733
FBgn0266557	kis	408.739	-0.793438	0.367759	-2.1575	0.0309671	0.275957	709.938	505.849	252.989	444.145	607.894	348.567
FBgn0001942	eIF4A	2875.15	-0.267725	0.124412	-2.15192	0.0314039	0.276932	3641.72	3288.02	2703.82	3039.98	3464.87	2871.9
FBgn0026059	Mhcl	751.228	-0.912672	0.423936	-2.15285	0.0313304	0.276932	1170.08	1115.01	627.956	585.88	1142.54	606.918
FBgn0033777	CG17574	78.98	1.41177	0.656628	2.15003	0.031553	0.276932	21.0352	74.8087	184.095	81.2534	47.9219	132.674
FBgn0038100	Paip2	236.914	0.556642	0.258758	2.15121	0.0314599	0.276932	207.723	260.049	353.508	341.509	233.886	347.508
FBgn0039928	Cals	527.78	0.835277	0.388516	2.14991	0.0315621	0.276932	228.758	353.857	519.532	527.231	291.307	523.381
FBgn0264959	Src42A	105.5	0.80239	0.372635	2.15328	0.0312965	0.276932	68.3644	62.9343	102.777	124.018	65.6494	113.398
FBgn0000611	exd	363.669	0.860523	0.400641	2.14786	0.0317246	0.277436	202.464	308.734	404.331	529.674	255.599	467.003
FBgn0030834	CG8675	98.3834	1.08714	0.506304	2.14721	0.0317764	0.277436	28.9234	62.9343	131.012	73.3113	45.9288	102.162
FBgn0027547	CG1927	140.039	0.776943	0.36206	2.14589	0.0318814	0.277667	65.735	136.556	179.577	179.002	101.145	179.29
FBgn0002431	hyd	93.8184	-0.946121	0.441611	-2.14243	0.032159	0.277841	157.764	79.5584	33.8825	84.308	118.661	59.0953
FBgn0035558	CG11357	201.568	-0.712232	0.332466	-2.14227	0.0321718	0.277841	163.023	243.425	98.2593	150.899	203.224	124.579
FBgn0037822	CG14683	238.991	-0.610664	0.284881	-2.14357	0.032067	0.277841	262.94	227.988	175.06	146.012	245.464	160.536
FBgn0250869	CG42240	368.938	-0.589957	0.275584	-2.14075	0.0322943	0.277841	423.334	292.11	240.566	230.32	357.722	235.443
FBgn0259171	Pde9	127.605	1.15642	0.540104	2.14111	0.032265	0.277841	42.0704	83.1208	115.201	169.838	62.5956	142.519
FBgn0040005	CG17883	121.621	0.964092	0.45108	2.1373	0.0325738	0.279565	60.4762	85.4956	186.354	104.469	72.9859	145.411
FBgn0001301	kel	70.1435	1.06868	0.500289	2.13613	0.0326689	0.279703	26.294	23.7488	31.6237	70.2567	25.0214	50.9402
FBgn0285910	VhaAC39-1	163.235	0.691375	0.324286	2.13199	0.0330074	0.281918	152.505	84.3082	177.318	192.442	118.407	184.88
FBgn0283510	Pal1	64.6549	0.846748	0.397675	2.12924	0.0332341	0.283171	63.1056	41.5604	67.765	112.411	52.333	90.0879
FBgn0039668	Trc8	88.7823	-0.906852	0.427672	-2.12044	0.0339689	0.288736	115.694	115.182	55.3414	67.2021	115.438	61.2718
FBgn0039241	CG11089	197.329	1.03914	0.491214	2.11546	0.034391	0.290231	168.282	192.365	555.673	189.388	180.323	372.53
FBgn0259736	CG42390	409.715	-1.38185	0.652854	-2.11663	0.0342914	0.290231	397.04	611.531	242.825	145.401	504.285	194.113
FBgn0261239	Hr39	81.6113	1.08509	0.512929	2.11548	0.0343894	0.290231	18.4058	43.9353	50.8238	87.9736	31.1705	69.3987
FBgn0250814	UQCR-C2	1098.84	-0.716129	0.339037	-2.11224	0.0346655	0.291246	904.514	936.89	577.132	544.337	920.702	560.734
FBgn0264495	gpp	351.119	-0.806037	0.381625	-2.11212	0.0346761	0.291246	402.298	480.913	195.389	309.13	441.606	252.259
FBgn0003638	su(w[a])	168.489	-1.09809	0.521434	-2.10591	0.0352126	0.292468	231.387	200.677	99.3887	102.025	216.032	100.707
FBgn0013672	mt:ATPase6	6209.35	1.00862	0.478948	2.1059	0.0352127	0.292468	1777.47	4663.07	9511.95	3460.3	3220.27	6486.12
FBgn0030869	Socs16D	116.538	-0.679401	0.322377	-2.10747	0.0350767	0.292468	126.211	136.556	89.2239	76.366	131.383	82.795
FBgn0034061	Ufc1	85.5963	0.962023	0.456878	2.10565	0.0352351	0.292468	21.0352	66.4966	76.8004	104.469	43.7659	90.6345
FBgn0262475	bru2	140.363	-1.07876	0.512208	-2.10609	0.0351965	0.292468	92.029	102.12	53.0826	39.7103	97.0744	46.3965
FBgn0086855	CG17078	80.6914	-0.971876	0.461813	-2.10448	0.0353365	0.292622	207.723	74.8087	59.8591	80.0316	141.266	69.9453
FBgn0004811	fs(2)ltoPP43	74.8517	0.729217	0.347453	2.09875	0.0358392	0.294965	49.9586	59.372	86.9651	96.5266	54.6653	91.7459
FBgn0045823	vsg	578.548	0.57158	0.272323	2.0989	0.0358255	0.294965	517.992	428.666	808.663	595.044	473.329	701.853
FBgn0264753	Rgk1	143.731	-0.633603	0.301946	-2.0984	0.0358696	0.294965	189.317	153.18	120.848	98.9703	171.248	109.909
FBgn0259740	CG42394	84.8947	0.969051	0.463586	2.09034	0.0365874	0.30017	42.0704	77.1836	121.977	118.52	59.627	120.249
FBgn0040942	CG12643	528.603	0.792997	0.379882	2.08748	0.0368444	0.300882	265.569	391.855	712.662	434.981	328.712	573.821
FBgn0261802	CG42748	746.021	-0.614684	0.294451	-2.08756	0.0368374	0.300882	638.944	740.962	483.39	420.318	689.953	451.854
FBgn0030321	CG1703	158.692	-0.770382	0.370339	-2.08021	0.0375063	0.305581	234.017	201.865	158.118	98.3594	217.941	128.239
FBgn0032260	CG13144	622.37	-1.06186	0.510948	-2.07822	0.0376893	0.306367	318.158	454.789	247.342	125.24	386.473	186.291
FBgn0001125	Got2	323.547	-0.685571	0.330149	-2.07655	0.0378432	0.306912	378.634	334.858	278.966	166.172	356.746	222.569
FBgn0033339	Sec31	98.6038	-0.702124	0.338739	-2.07276	0.0381949	0.309056	165.652	117.556	79.0592	91.6392	141.604	85.3492
FBgn0037551	Arl8	131.49	0.992485	0.479196	2.07115	0.038345	0.309562	92.029	89.058	206.683	153.954	90.5435	180.319
FBgn0030341	p24-1	192.89	-0.486294	0.235043	-2.06895	0.0385504	0.310511	252.422	207.802	160.377	164.34	230.112	162.358
FBgn0031717	Oscillin	233.817	0.727834	0.352304	2.06593	0.0388355	0.312096	176.17	216.114	407.72	248.037	196.142	327.878
FBgn0053493	CG33493	135.696	1.01805	0.493543	2.06273	0.0391382	0.313816	134.099	89.058	337.696	111.8	111.579	224.748
FBgn0035252	CG7970	128.376	0.777254	0.377084	2.06122	0.0392817	0.314253	107.805	98.5575	208.942	144.79	103.181	176.866
FBgn0017578	Max	82.9326	-0.793338	0.385187	-2.05962	0.039435	0.314768	144.617	91.4328	74.5415	59.8709	118.025	67.2062
FBgn0003744	trc	123.957	0.69046	0.335621	2.05726	0.0396611	0.31586	94.6584	87.8705	144.565	148.455	91.2645	146.51
FBgn0002069	AspRS	487.637	-0.53888	0.262747	-2.05095	0.040272	0.316116	517.992	542.66	389.649	342.12	530.326	365.884
FBgn0031771	ND-51	423.522	-0.761358	0.371382	-2.05007	0.0403577	0.316116	433.851	346.732	217.977	240.706	390.292	229.342
FBgn0037607	CG8036	2497.83	-1.09444	0.533635	-2.05091	0.0402757	0.316116	4993.23	4923.12	2485.85	2158.41	4958.18	2322.13
FBgn0037680	pasi2	67.6355	1.52265	0.740873	2.05522	0.039858	0.316116	28.9234	34.4357	60.9885	121.575	31.6796	91.2816
FBgn0243511	psidin	99.1426	-0.992346	0.483459	-2.0526	0.0401118	0.316116	163.023	87.8705	59.8591	64.1474	125.447	62.0033
FBgn0261243	Psa	223.815	-0.58575	0.285795	-2.04955	0.0404085	0.316116	336.563	260.049	201.036	193.664	298.306	197.35
FBgn0261565	Lmpt	341.689	-0.664772	0.323751	-2.05335	0.0400391	0.316116	336.563	331.296	203.295	217.49	333.929	210.393
FBgn0283472	S6k	540.077	-0.522218	0.25468	-2.05049	0.0403169	0.316116	381.263	370.481	248.472	273.696	375.872	261.084
FBgn0015794	Rab18	108.073	1.05256	0.515508	2.04178	0.0411732	0.32015	47.3292	73.6212	173.93	83.0862	60.4752	128.508
FBgn0028689	Rpn6	529.259	-0.438847	0.214891	-2.04219	0.0411329	0.32015	746.75	587.782	470.967	507.07	667.266	489.019
FBgn0029688	lva	70.0061	-1.08107	0.529531	-2.04155	0.0411957	0.32015	134.099	92.6203	53.0826	53.1507	113.36	53.1167
FBgn0010226	GstS1	260.575	0.733525	0.360027	2.03741	0.0416086	0.321769	234.017	180.491	221.366	460.029	207.254	340.697
FBgn0027794	Lrpprc2	78.9183	-0.942059	0.463437	-2.03277	0.0420761	0.321769	84.1408	72.4338	40.659	40.3212	78.2873	40.4901
FBgn0031266	Sf3b1	130.326	-0.627451	0.30798	-2.03731	0.0416192	0.321769	202.464	143.68	86.9651	131.349	173.072	109.157
FBgn0033439	CG1773	66.9852	1.44308	0.70996	2.03262	0.0420911	0.321769	13.147	56.9971	134.401	65.9802	35.072	100.19
FBgn0036101	NijA	154.591	1.41733	0.696979	2.03353	0.0419987	0.321769	73.6232	37.9981	112.942	179.613	55.8106	146.277
FBgn0036921	RhoGDI	294.842	0.606177	0.298284	2.03221	0.042132	0.321769	249.793	263.612	504.849	281.638	256.702	393.244
FBgn0260442	rhea	92.9069	-0.611978	0.300477	-2.03669	0.041681	0.321769	123.582	148.43	85.8357	93.472	136.006	89.6538
FBgn0283536	Vha13	358.27	0.606543	0.298385	2.03276	0.0420772	0.321769	286.605	252.925	509.367	312.184	269.765	410.776
FBgn0026415	Idgf4	183.854	0.957369	0.47171	2.02957	0.0424	0.322957	134.099	140.118	313.978	219.934	137.109	266.956
FBgn0052441	CG32441	119.305	-0.503386	0.24811	-2.02888	0.0424703	0.322957	120.952	111.619	84.7063	78.8097	116.286	81.758
FBgn0032938	CG8671	119.786	0.80076	0.395184	2.0263	0.0427346	0.323575	44.6998	98.5575	93.7416	164.34	71.6286	129.041
FBgn0040235	c12.1	99.208	0.827763	0.408464	2.02653	0.0427107	0.323575	92.029	45.1227	100.518	131.96	68.5759	116.239
FBgn0004401	Pep	635.766	-0.655853	0.323862	-2.0251	0.042857	0.323809	1114.87	807.459	540.991	675.075	961.162	608.033
FBgn0044826	Pak3	259.721	0.540115	0.266879	2.02382	0.0429882	0.324107	173.54	191.178	236.048	295.078	182.359	265.563
FBgn0039828	CG1542	104.932	-0.831415	0.41117	-2.02207	0.0431691	0.324779	115.694	131.806	76.8004	63.5365	123.75	70.1684
FBgn0025574	Pli	441.767	0.728675	0.360762	2.01982	0.0434016	0.325835	318.158	404.917	613.273	589.545	361.537	601.409
FBgn0026428	HDAC6	67.5696	-0.885832	0.439165	-2.01708	0.0436872	0.325903	115.694	144.868	67.765	73.9223	130.281	70.8436
FBgn0030183	CG15309	592.545	0.570041	0.282486	2.01794	0.0435971	0.325903	439.11	480.913	742.027	627.423	460.011	684.725
FBgn0033015	d4	148.897	0.688779	0.341201	2.01869	0.0435194	0.325903	105.176	96.1826	131.012	189.999	100.679	160.505
FBgn0038627	CG7694	67.9211	0.92149	0.458031	2.01185	0.0442358	0.329301	26.294	28.4985	66.6356	39.7103	27.3963	53.173
FBgn0263120	Acsl	184.488	0.888361	0.441986	2.00993	0.0444388	0.330117	57.8468	84.3082	146.824	121.575	71.0775	134.199
FBgn0032170	CG4658	80.1543	0.686287	0.34166	2.00868	0.0445708	0.330403	52.588	73.6212	92.6122	114.854	63.1046	103.733
FBgn0026250	eIF1A	908.518	-0.341427	0.170264	-2.00528	0.0449331	0.331698	1106.98	1005.76	905.792	761.216	1056.37	833.504
FBgn0086690	Plp	522.124	-0.786402	0.392051	-2.00587	0.0448705	0.331698	623.168	960.638	512.755	408.711	791.903	460.733
FBgn0010583	dock	101.968	0.980984	0.489683	2.0033	0.0451447	0.332388	44.6998	62.9343	92.6122	122.797	53.817	107.704
FBgn0013676	mt:CoIII	8342.1	1.1237	0.561108	2.00265	0.0452146	0.332388	2624.14	6343.3	14749.1	4801.89	4483.72	9775.48
FBgn0000639	Fbp1	2117.48	0.960815	0.480467	1.99975	0.0455272	0.333992	1582.9	2019.83	5239.37	1778.41	1801.37	3508.89
FBgn0028369	kirre	409.585	-0.908257	0.45506	-1.99591	0.045944	0.334106	431.222	611.531	248.472	307.908	521.376	278.19
FBgn0031390	tho2	100.619	-0.818631	0.410222	-1.99558	0.0459796	0.334106	270.828	137.743	96.0004	131.349	204.286	113.675
FBgn0033581	CG12391	98.992	-0.620237	0.310787	-1.9957	0.0459664	0.334106	181.429	127.056	101.648	95.9157	154.242	98.7816
FBgn0037001	ND-39	697.561	-0.58586	0.293581	-1.99556	0.0459814	0.334106	607.392	692.277	505.979	363.502	649.834	434.74
FBgn0051211	CG31211	150.58	-0.774019	0.38793	-1.99525	0.0460152	0.334106	199.834	207.802	77.9298	158.23	203.818	118.08
FBgn0005278	Sam-S	342.092	0.454239	0.228145	1.99101	0.0464796	0.336098	202.464	284.985	347.86	332.345	243.725	340.103
FBgn0041582	tamo	128.377	-0.587657	0.295042	-1.99177	0.0463962	0.336098	144.617	112.807	83.5769	84.919	128.712	84.2479
FBgn0036111	Aps	653.356	0.437534	0.220142	1.98751	0.0468659	0.337511	510.104	705.339	771.392	885.845	607.721	828.619
FBgn0038234	mRpL11	97.9438	1.11298	0.55981	1.98814	0.0467962	0.337511	23.6646	46.3101	94.871	62.9256	34.9874	78.8983
FBgn0020910	RpL3	8184.67	-0.481347	0.242642	-1.98378	0.0472809	0.339808	10291.5	9386.71	7257.63	6836.89	9839.09	7047.26
FBgn0027090	GlnRS	147.326	-0.702586	0.354458	-1.98214	0.0474632	0.340426	178.799	170.991	97.1299	116.687	174.895	106.909
FBgn0036820	Grx1	86.72	0.988443	0.498958	1.98101	0.0475899	0.340643	60.4762	51.0599	163.765	58.0381	55.7681	110.902
FBgn0015795	Rab7	268.149	0.678863	0.343564	1.97594	0.0481613	0.342653	163.023	257.674	385.131	298.133	210.349	341.632
FBgn0040070	Trx-2	574.385	0.620169	0.313766	1.97653	0.0480945	0.342653	352.34	432.228	742.027	471.025	392.284	606.526
FBgn0052230	ND-MLRQ	516.766	0.781407	0.395441	1.97604	0.0481502	0.342653	244.534	267.174	677.65	207.105	255.854	442.377
FBgn0035346	CG1146	93.9098	-0.857302	0.434881	-1.97135	0.0486838	0.344353	115.694	131.806	62.1179	74.5332	123.75	68.3256
FBgn0037728	p23	1458.9	-0.494851	0.25084	-1.97277	0.0485213	0.344353	1759.07	1439.18	1395.96	874.238	1599.12	1135.1
FBgn0037926	Elp1	68.2409	-0.797799	0.405062	-1.96957	0.0488872	0.344353	81.5114	112.807	65.5062	48.8742	97.1591	57.1902
FBgn0083123	Uhg5	83.746	1.04293	0.529516	1.96959	0.0488856	0.344353	21.0352	74.8087	146.824	62.9256	47.9219	104.875
FBgn0085359	CG34330	73.4751	1.04333	0.529682	1.96972	0.0488704	0.344353	36.8116	56.9971	76.8004	119.742	46.9044	98.2711
FBgn0039114	Lsd-1	76.6872	1.04921	0.533056	1.96829	0.0490344	0.344703	49.9586	72.4338	108.424	147.845	61.1962	128.134
FBgn0019925	Surf4	163.13	0.543535	0.276363	1.96674	0.049213	0.345106	120.952	135.368	216.848	161.896	128.16	189.372
FBgn0024807	DIP1	181.008	-0.534879	0.272051	-1.9661	0.0492869	0.345106	220.87	222.051	135.53	168.616	221.46	152.073
FBgn0250788	beta-Spec	469.462	-0.663371	0.337649	-1.96468	0.0494514	0.345573	525.88	491.6	273.319	367.168	508.74	320.243
FBgn0022361	Pur-alpha	247.869	0.873833	0.446539	1.9569	0.0503591	0.351222	115.694	161.492	257.507	254.757	138.593	256.132
FBgn0261797	Dhc64C	73.3404	-1.02413	0.523849	-1.95501	0.050582	0.352082	102.547	97.37	32.7531	64.1474	99.9583	48.4503
FBgn0028331	l(1)G0289	249.327	0.556244	0.284828	1.95292	0.0508296	0.352642	178.799	167.429	197.648	306.686	173.114	252.167
FBgn0086378	Alg-2	141.107	0.779301	0.3991	1.95264	0.0508618	0.352642	110.435	104.495	243.954	126.462	107.465	185.208
FBgn0015772	Nak	65.8713	-1.03892	0.532308	-1.95172	0.0509717	0.352712	99.9172	102.12	35.0119	62.3146	101.019	48.6633
FBgn0033875	CG6357	271.551	1.00088	0.513141	1.95049	0.0511178	0.353032	189.317	208.989	419.014	379.386	199.153	399.2
FBgn0036398	upSET	281.456	-0.722159	0.370718	-1.948	0.0514152	0.354394	339.193	352.669	137.789	279.194	345.931	208.491
FBgn0285952	eEF5	7270.58	0.54605	0.280856	1.94424	0.0518671	0.356813	4677.7	5465.78	9379.81	5438.48	5071.74	7409.14
FBgn0000047	Act88F	8852.21	-1.07371	0.558458	-1.92264	0.0545259	0.358763	5808.35	6818.28	3701.1	2298.92	6313.31	3000.01
FBgn0003676	CCT1	976.223	-0.675343	0.351092	-1.92355	0.0544111	0.358763	1477.72	1401.18	1102.31	701.956	1439.45	902.134
FBgn0004169	up	1450.34	-1.06949	0.557091	-1.91978	0.0548859	0.358763	2240.25	1813.22	1187.02	744.721	2026.73	965.869
FBgn0004435	Galphaq	210.716	0.797753	0.413904	1.92739	0.0539317	0.358763	97.2878	117.556	178.448	197.33	107.422	187.889
FBgn0005694	Aef1	90.9286	-0.649315	0.335532	-1.93518	0.0529679	0.358763	118.323	87.8705	62.1179	66.5911	103.097	64.3545
FBgn0015589	Apc	173.701	-0.713169	0.372159	-1.9163	0.0553264	0.358763	131.47	156.742	72.2827	103.247	144.106	87.7648
FBgn0025885	Inos	166.331	-0.603516	0.314558	-1.91862	0.055033	0.358763	194.576	225.613	117.459	158.841	210.095	138.15
FBgn0027599	CG2790	64.9564	-0.666149	0.347177	-1.91876	0.055015	0.358763	97.2878	94.9951	65.5062	56.2054	96.1415	60.8558
FBgn0029666	CG10803	151.897	0.64994	0.339403	1.91495	0.0554986	0.358763	86.7702	121.119	119.718	209.548	103.945	164.633
FBgn0029887	CG3198	456.984	-0.610019	0.314525	-1.93949	0.0524412	0.358763	631.056	458.352	312.849	396.492	544.704	354.67
FBgn0030412	Tomosyn	91.7545	-0.841424	0.438771	-1.91769	0.0551509	0.358763	205.093	103.307	91.4828	78.1988	154.2	84.8408
FBgn0030766	mthl1	94.0129	1.18649	0.611893	1.93905	0.0524953	0.358763	15.7764	28.4985	53.0826	51.9289	22.1375	52.5057
FBgn0031054	Ssu72	84.1458	-0.740787	0.384643	-1.92591	0.0541159	0.358763	113.064	113.994	82.4474	54.9835	113.529	68.7155
FBgn0033128	Tsp42Eg	118.061	-1.21935	0.634283	-1.92241	0.0545543	0.358763	81.5114	64.1217	46.3061	17.106	72.8166	31.706
FBgn0034962	MAN1	89.8396	-0.67281	0.347675	-1.93517	0.0529696	0.358763	102.547	108.057	49.6943	80.6425	105.302	65.1684
FBgn0035121	Tudor-SN	445.751	-0.36413	0.189366	-1.92289	0.0544938	0.358763	531.139	542.66	411.108	423.373	536.899	417.24
FBgn0036340	SRm160	107.304	-0.533829	0.2766	-1.92997	0.0536103	0.358763	178.799	163.867	119.718	116.076	171.333	117.897
FBgn0036538	CG15715	102.134	0.723583	0.376655	1.92107	0.0547224	0.358763	47.3292	86.6831	140.048	91.6392	67.0061	115.843
FBgn0036915	Prp3	93.6862	-0.550801	0.286914	-1.91974	0.0548906	0.358763	120.952	129.431	71.1533	98.3594	125.192	84.7563
FBgn0037972	CG10005	70.4497	1.07237	0.559907	1.91527	0.0554581	0.358763	49.9586	47.4976	84.7063	119.131	48.7281	101.919
FBgn0039936	Gyf	298.003	-0.658355	0.340478	-1.93362	0.05316	0.358763	412.816	345.545	248.472	230.931	379.18	239.701
FBgn0043456	Ndf	363.508	-0.549371	0.28687	-1.91505	0.0554856	0.358763	536.398	594.907	359.155	414.209	565.652	386.682
FBgn0052521	CG32521	117.02	0.764126	0.394019	1.93931	0.0524636	0.358763	68.3644	98.5575	126.495	161.285	83.4609	143.89
FBgn0052672	Atg8a	731.775	0.549204	0.285968	1.92051	0.0547933	0.358763	581.098	809.834	1231.06	815.589	695.466	1023.33
FBgn0053129	CG33129	246.825	0.621789	0.322211	1.92976	0.0536368	0.358763	191.946	212.552	295.907	328.068	202.249	311.988
FBgn0053978	CG33978	143.448	1.44999	0.75195	1.9283	0.0538176	0.358763	89.3996	39.1855	73.4121	271.252	64.2926	172.332
FBgn0058191	CG40191	124.262	0.79041	0.408477	1.93502	0.0529881	0.358763	89.3996	81.9333	162.636	133.182	85.6665	147.909
FBgn0086691	UK114	179.254	1.01584	0.526006	1.93123	0.0534549	0.358763	134.099	147.242	431.437	140.513	140.671	285.975
FBgn0250823	gish	607.913	-0.336241	0.175021	-1.92115	0.0547129	0.358763	736.232	806.271	618.921	606.651	771.252	612.786
FBgn0261556	CG42674	104.805	-0.834724	0.432553	-1.92976	0.0536364	0.358763	191.946	122.306	71.1533	102.025	157.126	86.5891
FBgn0261648	salm	928.398	-0.954443	0.494427	-1.9304	0.0535569	0.358763	1283.15	1534.17	803.016	651.86	1408.66	727.438
FBgn0263832	Rcd5	130.406	-0.764137	0.397143	-1.92409	0.0543435	0.358763	252.422	150.805	114.071	120.353	201.614	117.212
FBgn0275436	PheRS-m	609.908	-0.694523	0.362314	-1.91691	0.0552499	0.358763	1306.81	930.952	788.333	593.211	1118.88	690.772
FBgn0085220	Ufm1	75.1	1.02122	0.533641	1.91368	0.0556614	0.359158	60.4762	32.0609	101.648	80.6425	46.2685	91.145
FBgn0003277	RpII215	152.877	-0.630779	0.330362	-1.90936	0.0562158	0.360608	239.275	212.552	123.106	166.172	225.914	144.639
FBgn0013765	cnn	122.459	-0.678939	0.355752	-1.90846	0.0563319	0.360608	226.128	146.055	96.0004	131.96	186.092	113.98
FBgn0015269	Nf1	89.8433	-0.714115	0.37459	-1.90639	0.0565999	0.360608	89.3996	113.994	54.212	70.2567	101.697	62.2344
FBgn0036510	SCCRO	94.4282	0.794544	0.415824	1.91077	0.0560338	0.360608	44.6998	65.3092	112.942	83.6971	55.0045	98.3194
FBgn0053208	Mical	1562.29	-0.414149	0.21711	-1.90755	0.0564489	0.360608	1425.14	1473.61	1041.32	1133.88	1449.37	1087.6
FBgn0058469	lncRNA:CR40469	3577.57	0.782753	0.410543	1.90663	0.056569	0.360608	2035.16	1936.71	4098.65	2735.12	1985.93	3416.89
FBgn0261800	LanB1	337.992	-0.476721	0.249625	-1.90974	0.0561661	0.360608	546.915	448.852	348.99	362.891	497.884	355.941
FBgn0031885	Mnn1	65.0224	0.947284	0.497216	1.90518	0.0567571	0.360654	44.6998	52.2473	56.4709	130.128	48.4736	93.2992
FBgn0266064	GlyS	419.611	-0.618424	0.324673	-1.90476	0.0568112	0.360654	452.257	495.162	346.731	272.474	473.71	309.602
FBgn0039350	jigr1	126.638	-0.566991	0.297925	-1.90314	0.0570227	0.360702	199.834	173.366	116.33	133.182	186.6	124.756
FBgn0046876	Obp83ef	85.9313	1.04901	0.551073	1.90359	0.0569641	0.360702	34.1822	84.3082	176.189	78.1988	59.2452	127.194
FBgn0001168	h	336.79	-0.55993	0.294663	-1.90024	0.0574022	0.360894	615.28	518.911	407.72	360.447	567.095	384.084
FBgn0004432	Cyp1	6392.37	0.403894	0.2126	1.89979	0.0574613	0.360894	4314.85	4812.69	7233.92	4851.99	4563.77	6042.95
FBgn0035770	pst	71.1358	0.849451	0.446582	1.90212	0.0571559	0.360894	86.7702	47.4976	127.624	107.523	67.1339	117.574
FBgn0083968	CG34132	331.887	1.05108	0.553098	1.90035	0.0573867	0.360894	57.8468	191.178	373.837	153.954	124.512	263.895
FBgn0001248	Idh	714.303	-0.334792	0.176989	-1.8916	0.0585446	0.363279	967.62	815.771	635.862	768.547	891.695	702.205
FBgn0016041	Tom40	486.088	-0.587186	0.309947	-1.89447	0.0581626	0.363279	410.187	349.107	274.448	230.32	379.647	252.384
FBgn0033032	kune	104.582	0.945341	0.498931	1.89473	0.0581279	0.363279	65.735	59.372	81.318	157.008	62.5535	119.163
FBgn0035423	eIF1	727.092	0.617095	0.326012	1.89286	0.0583765	0.363279	423.334	687.527	1162.17	555.333	555.43	858.752
FBgn0035896	CG6983	112.628	1.13598	0.600576	1.89148	0.0585602	0.363279	44.6998	37.9981	77.9298	102.025	41.3489	89.9774
FBgn0038947	Sar1	387.551	0.40252	0.212352	1.89553	0.0580216	0.363279	376.004	345.545	496.943	454.53	360.775	475.737
FBgn0085195	CG34166	754.825	1.84268	0.973747	1.89236	0.0584436	0.363279	478.551	648.342	3744.02	300.577	563.446	2022.3
FBgn0030257	SmydA-4	489.496	-1.12165	0.593442	-1.89007	0.0587481	0.363577	478.551	521.286	299.296	161.285	499.918	230.29
FBgn0259238	CG42336	99.9778	1.03183	0.546283	1.88881	0.0589168	0.363577	86.7702	51.0599	185.224	92.861	68.9151	139.043
FBgn0261862	whd	365.39	-0.692118	0.366315	-1.88941	0.0588371	0.363577	244.534	225.613	154.73	136.237	235.074	145.484
FBgn0010470	Fkbp14	237.6	0.539234	0.286185	1.88422	0.0595359	0.36413	189.317	211.364	284.613	299.966	200.341	292.289
FBgn0015776	nrv1	66.1918	1.2545	0.666565	1.88204	0.0598302	0.36413	44.6998	32.0609	74.5415	105.691	38.3803	90.116
FBgn0035205	Ctr9	163.727	-0.600183	0.318667	-1.88342	0.0596438	0.36413	262.94	254.112	142.307	196.719	258.526	169.513
FBgn0036335	mRpL20	124.57	0.655653	0.347764	1.88534	0.0593842	0.36413	73.6232	75.9961	160.377	79.4206	74.8097	119.899
FBgn0037051	CG10565	144.213	-0.694896	0.369101	-1.88267	0.0597449	0.36413	105.176	204.24	106.165	89.8064	154.708	97.9858
FBgn0040010	CG17493	123.573	1.17909	0.625488	1.88508	0.0594196	0.36413	47.3292	96.1826	164.895	165.561	71.7559	165.228
FBgn0260798	Gprk1	195.231	0.669528	0.355313	1.88433	0.0595202	0.36413	110.435	154.367	246.213	182.057	132.401	214.135
FBgn0263398	Uck	195.358	0.598107	0.317388	1.88447	0.0595015	0.36413	120.952	176.928	228.142	230.32	148.94	229.231
FBgn0033656	S2P	92.0021	-0.681957	0.362624	-1.88062	0.0600238	0.364681	134.099	72.4338	58.7297	65.3693	103.267	62.0495
FBgn0034075	Asph	612.269	-0.683358	0.363886	-1.87794	0.0603889	0.366269	481.18	636.467	377.225	321.348	558.824	349.287
FBgn0036135	mRpL2	145.158	-0.587099	0.312824	-1.87677	0.0605493	0.366613	168.282	151.992	120.848	92.861	160.137	106.854
FBgn0000212	brm	154.54	-0.662408	0.353506	-1.87382	0.0609551	0.36844	326.046	184.053	114.071	201.606	255.049	157.839
FBgn0011742	Arp2	80.7477	0.740143	0.39561	1.87089	0.0613598	0.369186	63.1056	75.9961	116.33	118.52	69.5509	117.425
FBgn0015602	BEAF-32	125.21	0.49955	0.266952	1.87131	0.0613019	0.369186	126.211	105.682	178.448	146.623	115.947	162.535
FBgn0032330	Samuel	131.081	0.790285	0.422463	1.87066	0.0613918	0.369186	63.1056	87.8705	85.8357	177.169	75.4881	131.502
FBgn0020018	Ppox	124.733	-0.667985	0.35754	-1.86828	0.0617229	0.369293	123.582	144.868	96.0004	75.1441	134.225	85.5723
FBgn0032454	CG5787	108.038	-0.734336	0.392809	-1.86945	0.0615603	0.369293	176.17	131.806	62.1179	119.131	153.988	90.6244
FBgn0035639	kri	186.032	-0.584636	0.312872	-1.86861	0.0616767	0.369293	252.422	275.486	179.577	173.504	263.954	176.54
FBgn0000567	Eip74EF	279.419	-0.697839	0.374412	-1.86383	0.062346	0.372391	241.905	277.861	153.601	167.394	259.883	160.497
FBgn0028327	l(1)G0320	454.603	0.557868	0.2996	1.86204	0.0625969	0.372628	362.857	296.86	377.225	586.491	329.859	481.858
FBgn0032513	CG6565	150.046	-0.849674	0.456495	-1.8613	0.0627018	0.372628	102.547	134.181	67.765	64.7584	118.364	66.2617
FBgn0039186	CG5746	212.583	0.558819	0.300178	1.86162	0.062656	0.372628	126.211	175.741	216.848	234.596	150.976	225.722
FBgn0036323	CG14118	280.702	0.68456	0.367969	1.86037	0.0628326	0.372779	197.205	254.112	457.414	274.307	225.659	365.86
FBgn0029067	Dd	123.876	0.795117	0.427715	1.85899	0.0630288	0.373316	44.6998	90.2454	107.295	134.404	67.4726	120.849
FBgn0010333	Rac1	309.781	0.414038	0.223056	1.85621	0.0634239	0.373421	228.758	287.36	333.178	361.669	258.059	347.424
FBgn0038610	CG7675	90.5267	1.2142	0.654238	1.85589	0.063469	0.373421	63.1056	55.8096	62.1179	211.381	59.4576	136.749
FBgn0250789	alpha-Spec	904.26	-0.572906	0.308559	-1.85672	0.0633513	0.373421	941.326	951.139	508.238	761.827	946.232	635.032
FBgn0259677	CG42346	115.629	-0.797946	0.429796	-1.85657	0.0633726	0.373421	60.4762	132.993	59.8591	54.9835	96.7347	57.4213
FBgn0033897	Rcd1	109.702	-0.586624	0.316305	-1.85461	0.0636515	0.373873	176.17	143.68	80.1886	128.295	159.925	104.242
FBgn0024811	Crk	196.966	0.822275	0.443957	1.85215	0.0640045	0.373892	86.7702	169.804	260.895	201.606	128.287	231.251
FBgn0030930	Pgant7	69.8623	1.05201	0.568149	1.85164	0.0640776	0.373892	31.5528	51.0599	59.8591	114.244	41.3064	87.0513
FBgn0037536	CG2698	88.4027	0.762771	0.411933	1.85169	0.0640708	0.373892	52.588	40.3729	66.6356	86.7518	46.4805	76.6937
FBgn0038043	CG17202	122.8	0.730059	0.394006	1.85291	0.0638948	0.373892	120.952	97.37	221.366	139.292	109.161	180.329
FBgn0000253	Cam	2822.23	-0.365991	0.197941	-1.84899	0.0644591	0.374868	3512.88	3451.89	2920.67	2485.25	3482.38	2702.96
FBgn0026869	Thd1	542.9	-0.581701	0.315062	-1.84631	0.0648477	0.374868	646.833	700.589	494.685	407.489	673.711	451.087
FBgn0028490	CG31705	63.9545	1.16841	0.632438	1.84746	0.0646799	0.374868	36.8116	37.9981	84.7063	83.6971	37.4048	84.2017
FBgn0036641	Smn	110.37	-0.514639	0.278741	-1.8463	0.0648488	0.374868	160.393	146.055	114.071	100.192	153.224	107.132
FBgn0039116	CG10375	93.5947	-0.655773	0.355365	-1.84535	0.064987	0.374868	152.505	104.495	89.2239	72.0895	128.5	80.6567
FBgn0051158	Efa6	87.3241	-0.719408	0.389816	-1.84551	0.0649639	0.374868	105.176	118.744	51.9532	83.0862	111.96	67.5197
FBgn0267824	PRAS40	63.9066	-0.795188	0.430884	-1.84548	0.0649676	0.374868	63.1056	80.7459	47.4355	37.2666	71.9257	42.3511
FBgn0026427	Su(var)2-HP2	83.0044	-0.738234	0.400555	-1.84303	0.0653249	0.375997	115.694	132.993	66.6356	82.4753	124.343	74.5554
FBgn0029093	cathD	892.271	0.625784	0.33963	1.84255	0.0653954	0.375997	836.149	789.647	1482.92	1026.36	812.898	1254.64
FBgn0000229	bsk	101.953	1.00798	0.548495	1.83772	0.0661033	0.376395	55.2174	56.9971	112.942	113.022	56.1073	112.982
FBgn0010341	Cdc42	441.653	0.399771	0.217328	1.83948	0.0658445	0.376395	347.081	390.668	478.873	498.517	368.874	488.695
FBgn0022023	eIF3h	923.046	-0.333561	0.181351	-1.83931	0.0658696	0.376395	1254.22	1012.89	960.004	833.917	1133.55	896.961
FBgn0039902	Zip102B	153.015	0.728475	0.396103	1.83911	0.0658994	0.376395	76.2526	104.495	138.918	164.34	90.3736	151.629
FBgn0264962	Pcf11	158.327	-0.477521	0.259744	-1.83843	0.0659987	0.376395	215.611	188.803	114.071	171.06	202.207	142.565
FBgn0267668	lncRNA:CR46006	119.464	1.25815	0.684356	1.83845	0.0659963	0.376395	57.8468	65.3092	89.2239	205.272	61.578	147.248
FBgn0030480	Tim9a	143.516	0.658293	0.359349	1.8319	0.0669657	0.380656	70.9938	89.058	173.93	85.5299	80.0259	129.73
FBgn0035802	Pura	69.524	-0.807444	0.441083	-1.83059	0.0671614	0.380656	155.135	115.182	84.7063	69.0349	135.158	76.8706
FBgn0061469	Ube3a	65.9915	-0.849746	0.464214	-1.8305	0.0671745	0.380656	113.064	91.4328	56.4709	56.2054	102.249	56.3381
FBgn0051140	CG31140	219.188	-0.637012	0.348201	-1.82944	0.0673341	0.38095	241.905	256.487	134.401	185.111	249.196	159.756
FBgn0034761	CG4250	254.498	1.31403	0.719018	1.82754	0.0676187	0.381949	202.464	186.428	564.709	401.991	194.446	483.35
FBgn0001991	Ca-alpha1D	124.282	-0.856408	0.46931	-1.82482	0.0680276	0.382033	147.246	144.868	85.8357	75.7551	146.057	80.7954
FBgn0023441	fus	71.4515	1.07309	0.587876	1.82536	0.0679462	0.382033	65.735	36.8106	71.1533	138.681	51.2728	104.917
FBgn0031187	Usp2	358.761	-0.585691	0.321002	-1.82457	0.0680659	0.382033	312.899	375.231	229.272	230.931	344.065	230.101
FBgn0034860	CG9812	174.359	0.845867	0.463504	1.82494	0.0680097	0.382033	147.246	176.928	399.814	186.944	162.087	293.379
FBgn0001215	Hrb98DE	973.435	-0.358064	0.197157	-1.81614	0.0693497	0.384338	1033.35	1198.13	927.251	819.865	1115.74	873.558
FBgn0003380	Sh	482.427	-0.65965	0.363353	-1.81545	0.0694547	0.384338	491.698	689.902	360.284	389.772	590.8	375.028
FBgn0032773	fon	1017	0.659405	0.362793	1.81758	0.0691289	0.384338	796.708	872.768	1662.5	978.096	834.738	1320.3
FBgn0036144	GlcAT-P	102.591	0.681364	0.375285	1.81559	0.0694335	0.384338	76.2526	109.244	164.895	138.681	92.7485	151.788
FBgn0038838	TotB	250.092	1.13201	0.623074	1.81682	0.0692453	0.384338	176.17	189.99	625.697	179.002	183.08	402.349
FBgn0039682	Obp99c	1314.5	0.798467	0.438949	1.81904	0.0689051	0.384338	1151.68	972.513	2529.89	1164.43	1062.1	1847.16
FBgn0263198	Acn	122.073	-0.643808	0.35405	-1.81841	0.0690013	0.384338	202.464	148.43	108.424	113.633	175.447	111.028
FBgn0267910	lncRNA:CR34335	997.742	0.912963	0.501985	1.81871	0.0689563	0.384338	925.549	896.517	2396.62	1035.52	911.033	1716.07
FBgn0267912	CanA-14F	259.802	-0.720828	0.395871	-1.82086	0.0686275	0.384338	239.275	172.179	127.624	120.353	205.727	123.988
FBgn0261552	ps	271.475	0.777594	0.428707	1.81381	0.0697069	0.385131	181.429	189.99	325.272	312.184	185.709	318.728
FBgn0016701	Rab4	96.1291	0.927532	0.511775	1.81238	0.0699269	0.385744	86.7702	56.9971	146.824	122.797	71.8837	134.81
FBgn0003345	sd	1141.74	-0.575284	0.318617	-1.80557	0.0709862	0.38904	957.102	1294.31	804.145	710.509	1125.71	757.327
FBgn0003396	shn	175.782	-0.60519	0.334939	-1.80686	0.0707836	0.38904	255.052	256.487	154.73	180.835	255.769	167.782
FBgn0035710	SP1173	80.0736	-0.842052	0.465789	-1.8078	0.0706377	0.38904	78.882	74.8087	37.2708	47.6524	76.8454	42.4616
FBgn0036515	AIMP2	295.951	-0.606545	0.335775	-1.8064	0.0708555	0.38904	234.017	206.614	176.189	114.244	220.316	145.216
FBgn0038829	CG17271	160.573	0.657681	0.364366	1.805	0.0710747	0.38904	76.2526	115.182	108.424	197.33	95.7171	152.877
FBgn0033926	Arc1	970.217	0.661319	0.366606	1.8039	0.0712478	0.389385	1262.11	1092.44	2048.76	1673.33	1177.28	1861.05
FBgn0001235	hth	2717	-0.49222	0.273034	-1.80278	0.0714232	0.389741	2521.6	2607.62	1490.83	2153.52	2564.61	1822.18
FBgn0011768	Fdh	372.969	-0.498904	0.277358	-1.79877	0.0720544	0.3918	462.775	370.481	333.178	255.368	416.628	294.273
FBgn0024841	Pcd	145.057	0.744897	0.414228	1.79828	0.0721329	0.3918	139.358	81.9333	214.589	150.288	110.646	182.439
FBgn0034368	zda	312.724	0.516884	0.287364	1.79871	0.072065	0.3918	220.87	300.422	415.625	339.065	260.646	377.345
FBgn0004363	porin	10165.8	-0.684194	0.380795	-1.79675	0.0723756	0.392218	8955.74	9505.45	7194.39	4297.27	9230.6	5745.83
FBgn0039338	XNP	131.636	-0.607137	0.337975	-1.7964	0.0724317	0.392218	257.681	161.492	98.2593	170.449	209.587	134.354
FBgn0039890	ABCD	136.574	0.755685	0.42112	1.79446	0.0727393	0.393282	65.735	106.87	163.765	134.404	86.3023	149.085
FBgn0010215	alpha-Cat	240.88	0.472849	0.263705	1.7931	0.0729568	0.393856	191.946	184.053	242.825	276.75	188	259.787
FBgn0000307	chif	80.2479	-0.710717	0.397582	-1.7876	0.0738411	0.396419	189.317	109.244	83.5769	95.3048	149.281	89.4408
FBgn0002031	l(2)37Cc	701.731	-0.694101	0.388504	-1.7866	0.0740022	0.396419	581.098	663.779	400.943	369.611	622.438	385.277
FBgn0022349	CG1910	433.7	-0.432744	0.241969	-1.78843	0.0737071	0.396419	560.062	672.091	442.731	472.858	616.077	457.795
FBgn0028939	NimC2	82.9218	0.92614	0.518187	1.78727	0.073894	0.396419	49.9586	86.6831	158.118	107.523	68.3208	132.821
FBgn0037743	CG8412	107.193	-1.14064	0.637566	-1.78906	0.0736055	0.396419	118.323	148.43	66.6356	54.9835	133.376	60.8096
FBgn0038744	CG4733	285.345	-0.800148	0.448019	-1.78597	0.0741043	0.396419	315.528	219.676	152.471	153.343	267.602	152.907
FBgn0001220	Hsc70-5	1035.22	-0.761687	0.4268	-1.78465	0.0743188	0.396966	920.29	951.139	598.591	505.848	935.715	552.22
FBgn0004177	mts	907.643	-0.31584	0.17718	-1.7826	0.0746517	0.398142	1072.8	965.388	771.392	860.186	1019.09	815.789
FBgn0040208	Kat60	173.062	-0.724559	0.407257	-1.77912	0.0752199	0.400569	255.052	300.422	177.318	160.063	277.737	168.691
FBgn0261479	nero	68.0193	-0.798109	0.449168	-1.77686	0.075591	0.401939	99.9172	97.37	63.2474	50.707	98.6436	56.9772
FBgn0000116	Argk	14243.5	-0.69201	0.390181	-1.77356	0.076136	0.403019	21879.2	20324.2	16468	9656.94	21101.7	13062.5
FBgn0039260	Smg6	94.0299	0.653016	0.368144	1.7738	0.0760956	0.403019	47.3292	64.1217	76.8004	101.414	55.7255	89.1072
FBgn0260635	Diap1	234.064	-0.452336	0.254876	-1.77473	0.0759422	0.403019	349.71	311.109	185.224	292.024	330.41	238.624
FBgn0035192	CG9194	142.476	-0.979383	0.552684	-1.77205	0.0763865	0.403741	236.646	258.862	161.507	91.0283	247.754	126.267
FBgn0261549	rdgA	300.033	-0.563363	0.318264	-1.77012	0.0767078	0.404834	294.493	325.358	227.013	194.275	309.926	210.644
FBgn0020660	eIF4B	71.3296	0.807369	0.456567	1.76835	0.0770024	0.405179	55.2174	54.6222	116.33	76.9769	54.9198	96.6534
FBgn0264894	CG44085	809.666	-0.982752	0.555643	-1.76868	0.076948	0.405179	620.539	807.459	406.59	317.072	713.999	361.831
FBgn0261238	Alh	106.866	-0.632686	0.357934	-1.76761	0.0771269	0.405231	181.429	179.303	115.201	117.298	180.366	116.249
FBgn0039258	beta4GalT7	77.4857	-0.664268	0.376464	-1.76449	0.077649	0.407369	63.1056	91.4328	63.2474	38.4885	77.2692	50.8679
FBgn0003884	alphaTub84B	26195	-0.606891	0.344232	-1.76303	0.0778957	0.408058	29570.2	30789.1	21634	17999.8	30179.7	19816.9
FBgn0004117	Tm2	1732.03	-0.995052	0.56547	-1.75969	0.0784605	0.410409	2250.77	2237.14	1410.64	841.859	2243.95	1126.25
FBgn0265487	mbl	1233.25	0.858757	0.488261	1.75881	0.0786103	0.410585	801.967	904.829	1107.96	1987.35	853.398	1547.65
FBgn0011336	Stt3B	279.272	-0.405527	0.231492	-1.7518	0.0798084	0.410775	420.704	358.607	276.707	307.297	389.655	292.002
FBgn0011573	Cdc37	205.124	-0.529425	0.302166	-1.7521	0.0797559	0.410775	257.681	308.734	210.072	185.111	283.208	197.591
FBgn0031047	Rcd-1	159.381	-0.539374	0.30767	-1.75309	0.0795857	0.410775	249.793	208.989	110.683	199.773	229.391	155.228
FBgn0036909	Ccdc58	283.92	0.684385	0.389929	1.75515	0.0792331	0.410775	97.2878	160.304	281.225	142.346	128.796	211.786
FBgn0037372	CG2091	117.085	-0.54965	0.312971	-1.75623	0.0790488	0.410775	181.429	161.492	129.883	104.469	171.46	117.176
FBgn0037374	jagn	231.676	0.723974	0.412448	1.75531	0.0792067	0.410775	131.47	129.431	275.578	157.008	130.45	216.293
FBgn0039025	Usp12-46	71.1562	-0.722173	0.412001	-1.75284	0.0796295	0.410775	99.9172	72.4338	41.7884	59.8709	86.1755	50.8297
FBgn0051606	CG31606	116.272	1.37083	0.781579	1.75393	0.0794429	0.410775	52.588	94.9951	271.06	114.854	73.7916	192.957
FBgn0259168	mnb	318.514	-0.4619	0.263635	-1.75205	0.0797659	0.410775	333.934	372.856	217.977	294.467	353.395	256.222
FBgn0284256	bsf	262.831	-0.842841	0.480994	-1.75229	0.0797238	0.410775	268.199	260.049	176.189	119.131	264.124	147.66
FBgn0027865	Tsp96F	74.417	1.37901	0.788563	1.74876	0.0803325	0.412272	15.7764	64.1217	108.424	106.301	39.9491	107.363
FBgn0052473	CG32473	80.4934	0.734849	0.42013	1.7491	0.0802743	0.412272	65.735	39.1855	92.6122	76.366	52.4603	84.4891
FBgn0035526	CG1316	159.684	0.431259	0.246808	1.74735	0.0805769	0.412928	160.393	116.369	175.06	188.166	138.381	181.613
FBgn0026147	TTLL4A	77.378	-0.920586	0.527443	-1.74538	0.0809194	0.413215	86.7702	118.744	40.659	67.813	102.757	54.236
FBgn0039776	PH4alphaEFB	86.0623	0.781706	0.447967	1.74501	0.0809835	0.413215	55.2174	67.684	98.2593	114.854	61.4507	106.557
FBgn0085484	Pdxk	136.018	0.718991	0.411736	1.74624	0.0807689	0.413215	84.1408	98.5575	127.624	174.114	91.3491	150.869
FBgn0030802	DENR	147.553	0.556581	0.319515	1.74196	0.0815163	0.415294	70.9938	110.432	147.954	127.684	90.7128	137.819
FBgn0032210	CYLD	393.552	0.842282	0.483701	1.74133	0.081626	0.415294	168.282	312.297	550.026	319.515	240.289	434.771
FBgn0026630	nes	173.967	0.70732	0.406872	1.73843	0.0821345	0.416848	73.6232	130.618	201.036	141.124	102.121	171.08
FBgn0030966	shop	69.5267	-0.782066	0.449916	-1.73825	0.0821671	0.416848	68.3644	68.8715	48.5649	32.3792	68.618	40.4721
FBgn0032859	Arpc2	223.884	0.479336	0.276052	1.7364	0.0824936	0.417905	139.358	217.301	265.413	243.149	178.33	254.281
FBgn0033021	CG10417	129.508	0.5796	0.334002	1.73532	0.0826845	0.418079	107.805	96.1826	135.53	166.172	101.994	150.851
FBgn0034398	CG15098	201.538	0.700653	0.404018	1.73421	0.0828807	0.418079	149.876	195.927	369.319	198.552	172.902	283.935
FBgn0038197	foxo	93.6172	0.641797	0.370082	1.7342	0.0828827	0.418079	49.9586	60.5594	106.165	70.8676	55.259	88.5164
FBgn0015000	betaggt-I	78.255	0.736934	0.425558	1.73169	0.083329	0.419731	55.2174	60.5594	110.683	84.308	57.8884	97.4955
FBgn0023129	aay	98.1599	0.873231	0.504822	1.72978	0.0836695	0.420589	44.6998	112.807	170.542	127.073	78.7533	148.807
FBgn0035714	CG8549	69.2298	0.839776	0.485588	1.7294	0.0837371	0.420589	13.147	54.6222	84.7063	48.8742	33.8846	66.7903
FBgn0010315	CycD	100.728	0.796342	0.461326	1.7262	0.0843112	0.421032	52.588	66.4966	110.683	98.9703	59.5423	104.827
FBgn0026777	Rad23	358.854	0.66632	0.386418	1.72435	0.0846443	0.421032	212.981	305.172	448.379	379.997	259.077	414.188
FBgn0028398	Taf10	129.231	0.629912	0.365957	1.72127	0.085201	0.421032	73.6232	129.431	203.295	121.575	101.527	162.435
FBgn0032200	CG5676	303.345	0.524035	0.303892	1.72441	0.0846335	0.421032	181.429	246.987	387.39	238.262	214.208	312.826
FBgn0032646	mEFTs	339.319	0.519439	0.301824	1.721	0.0852512	0.421032	181.429	165.054	239.436	254.757	173.241	247.097
FBgn0034646	Rae1	71.164	-0.8199	0.476414	-1.72098	0.0852542	0.421032	115.694	92.6203	59.8591	57.4272	104.157	58.6432
FBgn0036043	CG8177	68.0596	-1.03073	0.598493	-1.72221	0.0850319	0.421032	97.2878	135.368	51.9532	62.3146	116.328	57.1339
FBgn0036816	Indy	69.8349	0.787081	0.4561	1.72568	0.0844056	0.421032	65.735	30.8734	66.6356	91.0283	48.3042	78.8319
FBgn0038704	CG5316	116.296	-0.647895	0.376154	-1.72242	0.0849934	0.421032	186.687	137.743	97.1299	107.523	162.215	102.327
FBgn0038742	Arc42	78.3103	0.5806	0.33671	1.72433	0.084648	0.421032	47.3292	85.4956	103.906	103.858	66.4124	103.882
FBgn0062440	EMRE	145.768	0.795835	0.460824	1.72698	0.0841708	0.421032	94.6584	81.9333	222.495	84.919	88.2959	153.707
FBgn0261564	ReepA	1764.06	-0.641457	0.372552	-1.72179	0.0851071	0.421032	1632.86	2200.33	1455.82	1004.98	1916.59	1230.4
FBgn0032444	CCT4	1215.61	-0.561155	0.326563	-1.71837	0.0857299	0.422791	1693.33	1563.86	1270.59	937.774	1628.6	1104.18
FBgn0051184	LSm3	94.5204	0.850214	0.495427	1.71612	0.0861392	0.424217	65.735	89.058	206.683	77.5878	77.3965	142.136
FBgn0029878	Pat1	89.5347	0.64032	0.373501	1.71437	0.0864602	0.425206	47.3292	72.4338	85.8357	105.691	59.8815	95.7631
FBgn0052062	Rbfox1	1179.18	-0.410441	0.239827	-1.71141	0.087006	0.427296	1362.03	1559.11	1166.69	1034.91	1460.57	1100.8
FBgn0011206	bol	589.371	-0.704292	0.412095	-1.70905	0.0874414	0.427519	683.644	820.521	470.967	453.308	752.082	462.138
FBgn0011715	Snr1	83.3743	-0.750905	0.439072	-1.71021	0.0872271	0.427519	191.946	110.432	84.7063	92.2501	151.189	88.4782
FBgn0025463	Bap60	145.706	-0.672628	0.393834	-1.70789	0.0876558	0.427519	344.452	193.553	145.695	187.555	269.002	166.625
FBgn0030788	Sap30	95.8141	-0.496901	0.290827	-1.70858	0.0875291	0.427519	99.9172	103.307	55.3414	86.1408	101.612	70.7411
FBgn0037416	Osi9	130.485	-2.59706	1.52052	-1.70801	0.0876347	0.427519	89.3996	24.9362	0	18.3278	57.1679	9.16392
FBgn0011207	pelo	72.4856	0.832143	0.488024	1.70513	0.0881706	0.429029	18.4058	68.8715	105.036	62.3146	43.6386	83.6752
FBgn0037705	mura	304.77	-0.440136	0.258155	-1.70493	0.0882082	0.429029	302.381	381.168	238.307	268.197	341.775	253.252
FBgn0000667	Actn	690.733	-0.814625	0.478755	-1.70155	0.0888396	0.430915	975.508	1103.13	615.532	566.941	1039.32	591.237
FBgn0031822	Phf5a	78.3902	0.763805	0.448781	1.70196	0.0887636	0.430915	36.8116	54.6222	89.2239	70.8676	45.7169	80.0458
FBgn0004606	zfh1	211.593	-0.512946	0.302276	-1.69695	0.0897061	0.43098	299.752	345.545	221.366	232.153	322.648	226.759
FBgn0010288	Uch	330.164	-0.441064	0.259447	-1.70002	0.0891277	0.43098	491.698	406.104	387.39	273.696	448.901	330.543
FBgn0023215	Mnt	132.938	-0.628638	0.370218	-1.69802	0.0895036	0.43098	176.17	165.054	105.036	114.854	170.612	109.945
FBgn0038678	mRpL55	138.396	0.822537	0.484715	1.69695	0.0897062	0.43098	49.9586	89.058	168.283	84.919	69.5083	126.601
FBgn0050423	CG30423	403.401	0.489166	0.288132	1.69771	0.0895619	0.43098	291.863	349.107	560.191	347.007	320.485	453.599
FBgn0261119	Prp19	187.737	-0.44619	0.262856	-1.69747	0.0896079	0.43098	231.387	229.176	187.483	152.121	230.282	169.802
FBgn0261955	kdn	986.956	-0.603523	0.355345	-1.69841	0.0894295	0.43098	339.193	347.92	227.013	225.432	343.556	226.223
FBgn0014868	Ost48	362.378	-0.526438	0.310355	-1.69624	0.0898401	0.431037	562.692	347.92	232.66	391.605	455.306	312.132
FBgn0000173	ben	498.385	0.393258	0.232028	1.69487	0.0900996	0.431314	420.704	447.665	603.109	540.671	434.184	571.89
FBgn0260456	CG4806	74.879	-0.810799	0.478446	-1.69465	0.0901417	0.431314	55.2174	117.556	46.3061	54.3726	86.387	50.3393
FBgn0032586	Tpr2	391.797	0.430453	0.254319	1.69257	0.0905367	0.432618	241.905	189.99	266.542	307.297	215.948	286.92
FBgn0037248	srl	67.1759	-0.910791	0.538777	-1.69048	0.0909364	0.433942	70.9938	85.4956	24.8472	57.4272	78.2447	41.1372
FBgn0003071	Pfk	94.516	-0.66611	0.394215	-1.68971	0.0910827	0.434054	102.547	102.12	62.1179	66.5911	102.333	64.3545
FBgn0036096	CG8003	112.221	-0.491999	0.291288	-1.68904	0.0912108	0.43408	134.099	115.182	96.0004	80.6425	124.641	88.3215
FBgn0028429	I-2	127.282	-0.540667	0.320292	-1.68804	0.0914033	0.434412	157.764	134.181	108.424	91.6392	145.972	100.032
FBgn0015019	CCT3	1002.2	-0.607566	0.360178	-1.68685	0.091632	0.434914	1346.25	1283.62	995.016	731.892	1314.94	863.454
FBgn0030743	CG9921	75.5935	0.793775	0.4717	1.6828	0.0924147	0.436351	36.8116	35.6232	79.0592	47.6524	36.2174	63.3558
FBgn0033504	CAP	263.246	-0.560198	0.332911	-1.68272	0.0924284	0.436351	173.54	186.428	99.3887	143.568	179.984	121.478
FBgn0040237	bor	131.134	-0.71987	0.427769	-1.68285	0.0924046	0.436351	78.882	123.494	76.8004	49.4852	101.188	63.1428
FBgn0260722	lncRNA:CR42549	154.81	0.75225	0.446843	1.68348	0.0922828	0.436351	128.841	150.805	214.589	257.812	139.823	236.2
FBgn0032899	CG9338	110.575	0.954839	0.568179	1.68052	0.0928554	0.437782	57.8468	85.4956	146.824	134.404	71.6712	140.614
FBgn0010247	Parp	146.504	0.467685	0.279275	1.67464	0.094005	0.439277	81.5114	144.868	178.448	148.455	113.19	163.452
FBgn0025697	santa-maria	189.65	0.943322	0.562748	1.67628	0.0936838	0.439277	44.6998	43.9353	89.2239	81.2534	44.3175	85.2387
FBgn0026323	Tak1	200.242	-0.57621	0.344178	-1.67416	0.0940983	0.439277	105.176	174.554	115.201	78.1988	139.865	96.6997
FBgn0029755	Sas10	70.0383	-0.877183	0.524086	-1.67374	0.0941818	0.439277	84.1408	79.5584	49.6943	39.7103	81.8496	44.7023
FBgn0029830	Grip	140.268	-0.64379	0.384432	-1.67465	0.0940025	0.439277	184.058	186.428	126.495	111.189	185.243	118.842
FBgn0033672	rho-7	90.7877	-0.62391	0.371855	-1.67783	0.0933797	0.439277	55.2174	113.994	66.6356	48.8742	84.6058	57.7549
FBgn0040395	Unc-76	118.364	0.798321	0.476416	1.67568	0.0938005	0.439277	52.588	105.682	126.495	155.176	79.1351	140.835
FBgn0040777	CG14767	123.186	0.617232	0.368896	1.67319	0.0942906	0.439277	92.029	90.2454	123.106	155.176	91.1372	139.141
FBgn0051694	CG31694	94.8405	0.646478	0.385768	1.67582	0.0937734	0.439277	44.6998	77.1836	91.4828	105.691	60.9417	98.5867
FBgn0014455	Ahcy	842.849	-0.601408	0.359793	-1.67154	0.0946153	0.44021	1183.23	1120.94	858.357	661.024	1152.09	759.69
FBgn0003261	Rm62	1235.43	-0.427649	0.2561	-1.66985	0.0949489	0.440947	1351.51	1193.38	783.815	1103.34	1272.44	943.576
FBgn0015789	Rab10	254.738	0.364275	0.218252	1.66906	0.0951064	0.440947	147.246	217.301	238.307	243.76	182.274	241.034
FBgn0020257	Ppa	121.15	-0.985918	0.590936	-1.6684	0.0952365	0.440947	218.24	233.926	90.3534	137.459	226.083	113.906
FBgn0250830	CG12547	148.742	0.755247	0.452898	1.66759	0.0953973	0.440947	99.9172	112.807	173.93	186.333	106.362	180.132
FBgn0283666	Rap2l	66.4963	0.695759	0.417101	1.66808	0.0952993	0.440947	63.1056	46.3101	107.295	67.813	54.7079	87.5538
FBgn0010621	CCT5	1674.69	-0.518967	0.311929	-1.66373	0.0961659	0.443633	2279.69	1899.9	1659.11	1257.29	2089.8	1458.2
FBgn0034583	CG10527	133.354	0.90875	0.546315	1.66342	0.0962291	0.443633	36.8116	73.6212	133.271	80.6425	55.2164	106.957
FBgn0002525	Lam	1260.25	-0.429873	0.258877	-1.66053	0.0968081	0.445029	1446.17	1397.62	923.863	1184.59	1421.89	1054.23
FBgn0028687	Rpt1	503.008	-0.341018	0.205425	-1.66006	0.0969025	0.445029	652.091	569.971	477.743	483.244	611.031	480.494
FBgn0037635	CG9837	72.6321	1.0262	0.618185	1.66002	0.0969096	0.445029	34.1822	72.4338	151.342	72.0895	53.308	111.716
FBgn0026199	myo	197.023	0.66943	0.403934	1.65727	0.0974641	0.446995	178.799	140.118	221.366	281.638	159.459	251.502
FBgn0013469	klu	611.463	-1.01762	0.615875	-1.65231	0.0984708	0.448702	791.45	1210	559.061	430.704	1000.73	494.883
FBgn0036124	CG7839	65.6789	-0.879014	0.531844	-1.65277	0.0983787	0.448702	68.3644	118.744	51.9532	51.3179	93.5542	51.6356
FBgn0039293	Alg9	87.1251	0.76384	0.462239	1.65248	0.0984368	0.448702	21.0352	70.0589	89.2239	76.366	45.5471	82.795
FBgn0086656	shrb	142.508	-0.506301	0.306111	-1.65398	0.0981323	0.448702	231.387	161.492	152.471	121.575	196.44	137.023
FBgn0262126	Sec24CD	75.5416	0.887566	0.537158	1.65234	0.0984662	0.448702	84.1408	49.8725	102.777	139.902	67.0066	121.34
FBgn0003517	sta	6905.01	-0.367242	0.223153	-1.6457	0.0998255	0.449644	6896.92	6691.22	5482.19	5052.37	6794.07	5267.28
FBgn0011656	Mef2	1092.59	-0.7111	0.432092	-1.64571	0.099823	0.449644	1138.53	1525.86	893.369	736.168	1332.2	814.768
FBgn0026400	Noa36	75.0375	0.955584	0.580739	1.64546	0.0998744	0.449644	21.0352	67.684	137.789	43.9868	44.3596	90.8878
FBgn0027108	Inx2	756.654	1.08294	0.658528	1.64448	0.100076	0.449644	489.069	514.161	492.426	1631.79	501.615	1062.11
FBgn0027578	Nepl21	94.3855	1.00584	0.61131	1.64539	0.0998899	0.449644	47.3292	83.1208	195.389	72.0895	65.225	133.739
FBgn0033924	CG8613	73.0169	-0.63002	0.382178	-1.6485	0.0992502	0.449644	105.176	79.5584	75.6709	43.9868	92.3672	59.8289
FBgn0038504	Sur-8	125.765	0.625103	0.379523	1.64708	0.0995425	0.449644	94.6584	85.4956	129.883	146.012	90.077	137.947
FBgn0039800	Npc2g	99.3719	1.09734	0.665645	1.64854	0.0992424	0.449644	68.3644	72.4338	231.53	71.4786	70.3991	151.505
FBgn0039993	CG17691	217.326	0.625498	0.379747	1.64714	0.0995285	0.449644	147.246	124.681	282.354	137.459	135.964	209.907
FBgn0086655	jing	151.936	-0.518029	0.314905	-1.64503	0.0999638	0.449644	123.582	204.24	101.648	130.739	163.911	116.193
FBgn0265991	Zasp52	295.196	-0.858396	0.521763	-1.64518	0.0999323	0.449644	328.675	466.664	212.33	227.265	397.669	219.798
FBgn0010774	Ref1	322.317	0.376387	0.229063	1.64316	0.10035	0.450038	270.828	307.547	344.472	408.711	289.188	376.591
FBgn0036752	Adgf-A	165.798	0.648208	0.394569	1.64283	0.100419	0.450038	160.393	210.177	332.049	253.535	185.285	292.792
FBgn0030366	Usp7	246.288	-0.40756	0.248504	-1.64006	0.100994	0.452026	270.828	243.425	177.318	207.105	257.127	192.212
FBgn0030701	CG16952	93.1403	-0.495841	0.302442	-1.63946	0.101118	0.452026	147.246	128.243	77.9298	113.633	137.745	95.7812
FBgn0014388	sty	191.742	0.55291	0.337862	1.6365	0.101736	0.454214	141.988	166.242	153.601	298.133	154.115	225.867
FBgn0021906	RFeSP	856.394	-0.518223	0.316927	-1.63515	0.102018	0.454327	628.427	705.339	578.262	356.782	666.883	467.522
FBgn0029709	CHOp24	134.355	0.619272	0.378636	1.63553	0.101937	0.454327	105.176	115.182	184.095	156.398	110.179	170.246
FBgn0003462	Sod1	1448.21	0.427969	0.261946	1.63381	0.102299	0.455007	1101.72	1397.62	2148.15	1225.52	1249.67	1686.84
FBgn0040918	schlank	176.288	-0.440331	0.270131	-1.63007	0.103088	0.457938	165.652	155.555	133.271	104.469	160.603	118.87
FBgn0002787	Rpn8	117.193	-0.467501	0.288113	-1.62263	0.104668	0.460331	149.876	166.242	125.365	105.691	158.059	115.528
FBgn0005671	Vha55	249.69	0.378958	0.233513	1.62285	0.104621	0.460331	160.393	224.426	236.048	273.085	192.41	254.566
FBgn0011763	Dp	143.302	0.596983	0.367676	1.62367	0.104447	0.460331	107.805	113.994	131.012	203.439	110.9	167.226
FBgn0026086	Adar	119.054	-0.573409	0.352941	-1.62466	0.104236	0.460331	123.582	124.681	68.8944	96.5266	124.131	82.7105
FBgn0031313	CG5080	1513.33	-0.467419	0.287456	-1.62606	0.103938	0.460331	2760.87	2501.93	2107.49	1698.99	2631.4	1903.24
FBgn0035106	rno	70.3035	-0.829122	0.510833	-1.62308	0.104572	0.460331	118.323	108.057	60.9885	65.9802	113.19	63.4844
FBgn0052280	CG32280	126.809	0.62331	0.383367	1.62588	0.103975	0.460331	78.882	64.1217	134.401	84.919	71.5019	109.66
FBgn0265577	lncRNA:IBIN	91.9766	1.32004	0.812898	1.62387	0.104404	0.460331	105.176	52.2473	313.978	76.366	78.7117	195.172
FBgn0004919	gol	162.211	0.601242	0.371324	1.61918	0.105408	0.461887	123.582	146.055	204.424	207.105	134.818	205.765
FBgn0035285	CG12025	166.514	0.572357	0.353412	1.61952	0.105336	0.461887	97.2878	143.68	168.283	195.497	120.484	181.89
FBgn0037647	RagA-B	78.5394	0.764453	0.472131	1.61916	0.105414	0.461887	23.6646	51.0599	93.7416	42.154	37.3622	67.9478
FBgn0001139	gro	185.496	-0.473273	0.292806	-1.61634	0.106021	0.463262	276.087	255.299	163.765	216.268	265.693	190.017
FBgn0002563	Lsp1beta	2465.86	1.36392	0.844943	1.61421	0.106481	0.463262	1209.52	2436.63	7823.47	1565.81	1823.07	4694.64
FBgn0032467	CG9934	109.916	-0.495333	0.307191	-1.61246	0.106862	0.463262	126.211	135.368	94.871	91.6392	130.79	93.2551
FBgn0035995	CG3529	99.335	-0.588983	0.365316	-1.61225	0.106907	0.463262	128.841	102.12	73.4121	78.1988	115.48	75.8054
FBgn0038108	CG7518	629.972	-0.678305	0.420559	-1.61286	0.106774	0.463262	291.863	250.55	116.33	219.934	271.207	168.132
FBgn0039528	dsd	95.604	-0.602222	0.373168	-1.61381	0.106568	0.463262	128.841	147.242	82.4474	99.5812	138.042	91.0143
FBgn0086443	AsnRS	247.875	-0.458549	0.283634	-1.61669	0.105944	0.463262	286.605	254.112	201.036	191.22	270.358	196.128
FBgn0262125	Sec23	200.368	-0.520965	0.323064	-1.61257	0.106837	0.463262	307.64	236.3	154.73	219.934	271.97	187.332
FBgn0262871	lute	87.2046	0.650211	0.402736	1.61449	0.106422	0.463262	70.9938	56.9971	105.036	93.472	63.9955	99.2539
FBgn0027495	Smyd4-4	123.841	-0.608409	0.379356	-1.60379	0.108759	0.464263	147.246	193.553	125.365	100.803	170.4	113.084
FBgn0027525	LTV1	188.333	-0.478605	0.29815	-1.60525	0.108439	0.464263	215.611	193.553	160.377	133.182	204.582	146.78
FBgn0028697	RpL15	9350.5	0.480224	0.298489	1.60885	0.10765	0.464263	7222.96	7492.74	13328.3	7204.06	7357.85	10266.2
FBgn0030724	Nipsnap	115.282	0.711074	0.442153	1.60821	0.10779	0.464263	81.5114	85.4956	162.636	112.411	83.5035	137.523
FBgn0031190	CG12576	141.586	0.575212	0.3587	1.6036	0.108802	0.464263	86.7702	165.054	207.813	177.78	125.912	192.796
FBgn0031700	CG14022	82.9572	-1.11696	0.69679	-1.60301	0.108932	0.464263	23.6646	32.0609	16.9413	9.77485	27.8627	13.3581
FBgn0035656	CG10479	67.4517	-0.716611	0.44688	-1.60359	0.108805	0.464263	76.2526	122.306	71.1533	52.5398	99.2794	61.8465
FBgn0035825	CG8111	119.182	-0.72127	0.449733	-1.60377	0.108764	0.464263	120.952	138.93	109.553	50.707	129.941	80.1302
FBgn0039073	CG4408	99.7136	0.846285	0.528	1.60281	0.108976	0.464263	81.5114	86.6831	206.683	97.7485	84.0972	152.216
FBgn0052177	Ndfip	300.244	0.553028	0.344175	1.60682	0.108093	0.464263	186.687	210.177	304.943	279.805	198.432	292.374
FBgn0052311	zormin	1235.74	-0.923235	0.573338	-1.61028	0.107337	0.464263	1717	1965.21	1071.82	870.572	1841.11	971.195
FBgn0250874	ttm50	153.266	-0.664543	0.414193	-1.60443	0.10862	0.464263	134.099	149.617	85.8357	93.472	141.858	89.6538
FBgn0260745	mfas	278.393	-0.58327	0.363555	-1.60435	0.108636	0.464263	404.928	330.108	173.93	312.795	367.518	243.363
FBgn0263118	tx	232.301	-0.769739	0.4799	-1.60396	0.108724	0.464263	344.452	442.915	240.566	222.378	393.683	231.472
FBgn0020255	Ran	1149.63	-0.281108	0.175613	-1.60072	0.109438	0.46546	1380.44	1361.99	1238.97	1020.86	1371.21	1129.92
FBgn0033639	CG9003	222.691	0.506034	0.316201	1.60035	0.10952	0.46546	202.464	174.554	255.248	276.75	188.509	265.999
FBgn0031698	Ncoa6	204.615	-0.547812	0.342449	-1.59969	0.109667	0.465525	244.534	249.362	151.342	185.722	246.948	168.532
FBgn0032897	CG9336	145.125	0.569343	0.356255	1.59813	0.110013	0.466434	136.729	125.869	229.272	160.674	131.299	194.973
FBgn0045866	bai	271.027	0.453511	0.283883	1.59753	0.110148	0.466447	247.164	231.551	364.802	290.802	239.357	327.802
FBgn0027932	Akap200	1421.16	-0.457965	0.287433	-1.59329	0.111094	0.469891	1622.34	1215.94	861.745	1198.64	1419.14	1030.19
FBgn0036428	Gbs-70E	369.094	0.425179	0.266959	1.59268	0.111232	0.469914	231.387	286.173	386.261	315.85	258.78	351.055
FBgn0010415	Sdc	1090.31	0.410525	0.258061	1.59081	0.111653	0.470226	817.744	958.264	1112.48	1251.79	888.004	1182.13
FBgn0033178	CG11127	73.572	-0.749704	0.471342	-1.59058	0.111705	0.470226	47.3292	81.9333	25.9766	51.3179	64.6313	38.6473
FBgn0037659	Kdm2	75.4976	-0.550528	0.346054	-1.59088	0.111638	0.470226	97.2878	106.87	53.0826	84.919	102.079	69.0008
FBgn0032160	CG4598	168.992	0.522451	0.328596	1.58995	0.111846	0.470259	120.952	166.242	275.578	146.012	143.597	210.795
FBgn0000042	Act5C	4677.18	0.664111	0.418161	1.58817	0.112247	0.470826	4309.59	3559.94	4946.85	7519.3	3934.77	6233.07
FBgn0025712	CG13920	188.547	-1.06444	0.670217	-1.5882	0.11224	0.470826	99.9172	67.684	46.3061	33.601	83.8006	39.9536
FBgn0032020	strat	65.1961	0.726517	0.457748	1.58715	0.112478	0.471234	55.2174	47.4976	105.036	64.7584	51.3575	84.8971
FBgn0030301	HP5	108.864	-0.611654	0.385856	-1.58519	0.112924	0.471523	178.799	167.429	124.236	102.636	173.114	113.436
FBgn0036165	chrb	1488.58	0.773334	0.488062	1.5845	0.11308	0.471523	1035.98	1055.63	1167.82	2405.83	1045.81	1786.83
FBgn0086372	lap	96.24	0.637709	0.402185	1.58561	0.112828	0.471523	57.8468	80.7459	103.906	115.465	69.2963	109.686
FBgn0259209	Mlp60A	1061.33	-0.810291	0.511364	-1.58457	0.113064	0.471523	1164.82	1154.19	895.628	428.26	1159.51	661.944
FBgn0016122	Acer	118.866	0.5908	0.373006	1.58389	0.113219	0.471547	44.6998	96.1826	128.754	94.6938	70.4412	111.724
FBgn0015286	Rala	182.452	1.01072	0.639155	1.58134	0.113799	0.47278	34.1822	87.8705	142.307	109.967	61.0264	126.137
FBgn0032785	CG10026	82.8989	0.836664	0.529256	1.58083	0.113917	0.47278	73.6232	80.7459	88.0945	186.944	77.1845	137.519
FBgn0038147	CCHa2	283.639	0.724903	0.458491	1.58106	0.113863	0.47278	320.787	248.175	670.874	268.808	284.481	469.841
FBgn0003964	usp	68.6301	0.76699	0.485452	1.57995	0.114118	0.472782	49.9586	24.9362	45.1767	74.5332	37.4474	59.8549
FBgn0004656	fs(1)h	705.61	-0.490857	0.31078	-1.57944	0.114236	0.472782	883.479	731.463	534.214	612.15	807.471	573.182
FBgn0031635	tank	85.4906	0.6366	0.403147	1.57908	0.114318	0.472782	52.588	85.4956	127.624	94.0829	69.0418	110.854
FBgn0011305	Rsf1	858.115	-0.247374	0.156851	-1.57713	0.114766	0.472975	912.402	914.328	825.604	716.618	913.365	771.111
FBgn0031871	Fgop2	73.9807	-0.73109	0.463458	-1.57747	0.114688	0.472975	141.988	98.5575	82.4474	61.7037	120.273	72.0756
FBgn0037466	CG1965	67.4182	-0.654175	0.414645	-1.57767	0.11464	0.472975	139.358	83.1208	50.8238	86.1408	111.239	68.4823
FBgn0039977	CG17454	112.893	0.528104	0.335462	1.57426	0.115428	0.475149	89.3996	81.9333	150.212	97.7485	85.6665	123.98
FBgn0052446	Atox1	99.6465	0.72892	0.463356	1.57313	0.115689	0.475669	47.3292	70.0589	107.295	91.6392	58.6941	99.4669
FBgn0011604	Iswi	77.4201	-0.758348	0.482358	-1.57217	0.115911	0.476031	147.246	115.182	56.4709	96.5266	131.214	76.4987
FBgn0262730	dtn	171.253	-0.658165	0.418897	-1.57118	0.11614	0.476416	218.24	207.802	93.7416	174.114	213.021	133.928
FBgn0026259	eIF5B	199.56	-0.692909	0.441519	-1.56937	0.116561	0.47658	291.863	238.675	112.942	212.603	265.269	162.772
FBgn0037231	Vps24	87.039	-0.620516	0.395416	-1.56927	0.116584	0.47658	131.47	100.932	82.4474	67.813	116.201	75.1302
FBgn0086129	snama	75.8267	-0.641183	0.408377	-1.57008	0.116397	0.47658	118.323	115.182	64.3768	84.308	116.752	74.3424
FBgn0263659	lncRNA:CR43650	235.561	-0.928756	0.593229	-1.56559	0.117444	0.479539	191.946	311.109	161.507	104.469	251.528	132.988
FBgn0037442	gzl	131.912	-0.427044	0.273534	-1.56121	0.118474	0.483189	147.246	141.305	110.683	103.858	144.276	107.27
FBgn0004370	Ptp10D	66.8115	1.05164	0.674119	1.56002	0.118756	0.483282	34.1822	35.6232	36.1413	107.523	34.9027	71.8323
FBgn0032884	Pomp	630.956	0.400258	0.256583	1.55996	0.11877	0.483282	394.41	552.159	777.039	485.688	473.285	631.363
FBgn0031118	RhoGAP19D	133.096	-0.787025	0.505127	-1.55807	0.119216	0.483979	252.422	135.368	73.4121	147.845	193.895	110.628
FBgn0032640	Sgt	268.795	-0.377005	0.241892	-1.55857	0.119099	0.483979	357.599	324.171	264.284	259.033	340.885	261.659
FBgn0000557	eEF1alpha2	24395.8	-0.596396	0.383106	-1.55674	0.119532	0.48471	21984.4	24243.9	17609.9	12967.6	23114.2	15288.7
FBgn0033127	Tsp42Ef	164.026	-0.543982	0.349837	-1.55496	0.119956	0.485498	128.841	117.556	101.648	68.4239	123.199	85.0357
FBgn0264389	opm	71.6992	-0.666935	0.428962	-1.55477	0.120002	0.485498	60.4762	94.9951	60.9885	40.3212	77.7357	50.6549
FBgn0010894	sinu	77.2426	1.02777	0.662153	1.55217	0.120622	0.486593	68.3644	27.3111	68.8944	119.742	47.8378	94.3182
FBgn0014869	Pglym78	925.33	-0.699559	0.451545	-1.54925	0.121321	0.486593	967.62	990.324	728.474	478.357	978.972	603.415
FBgn0015040	Cyp9c1	284.006	-0.590554	0.381491	-1.54802	0.121619	0.486593	357.599	364.544	232.66	246.815	361.071	239.737
FBgn0020443	eRF3	442.569	0.534674	0.345266	1.54859	0.121481	0.486593	228.758	333.67	397.555	423.373	281.214	410.464
FBgn0025702	Srpk79D	305.832	-0.721555	0.46667	-1.54618	0.122061	0.486593	155.135	279.048	150.212	116.076	217.091	133.144
FBgn0031260	Spp	111.34	0.677239	0.436073	1.55304	0.120413	0.486593	76.2526	91.4328	99.3887	169.227	83.8427	134.308
FBgn0031529	CG9662	65.0288	0.791244	0.511527	1.54683	0.121905	0.486593	47.3292	33.2483	79.0592	58.0381	40.2888	68.5487
FBgn0032247	CG5188	69.71	0.920321	0.594145	1.54898	0.121386	0.486593	23.6646	45.1227	71.1533	63.5365	34.3937	67.3449
FBgn0033038	CG7791	80.8471	-0.794181	0.512472	-1.54971	0.121212	0.486593	157.764	86.6831	65.5062	73.3113	122.224	69.4088
FBgn0035630	CG10576	1752.75	-0.583791	0.377242	-1.54752	0.121737	0.486593	2831.86	2598.12	2145.89	1477.83	2714.99	1811.86
FBgn0040273	Spt5	97.2233	-0.599913	0.387104	-1.54975	0.121203	0.486593	165.652	99.7449	79.0592	92.2501	132.699	85.6547
FBgn0264607	CaMKII	256.015	0.648813	0.418833	1.5491	0.121359	0.486593	134.099	175.741	219.107	269.419	154.92	244.263
FBgn0284243	betaTub56D	17335.3	-0.392033	0.253514	-1.54639	0.122009	0.486593	18308.5	20245.8	15274.2	14108.8	19277.2	14691.5
FBgn0029870	Marf	140.626	-0.755617	0.489103	-1.5449	0.12237	0.486764	199.834	116.369	93.7416	91.6392	158.102	92.6904
FBgn0037655	Kcmf1	75.5089	-0.724299	0.468843	-1.54486	0.122379	0.486764	76.2526	83.1208	55.3414	42.154	79.6867	48.7477
FBgn0003371	sgg	291.683	-0.481023	0.311565	-1.54389	0.122614	0.48715	333.934	226.801	152.471	242.538	280.367	197.505
FBgn0261925	CG42792	307.981	0.924447	0.599164	1.54289	0.122856	0.487565	231.387	283.798	720.568	260.255	257.593	490.412
FBgn0039754	CG9747	79.9872	-2.17884	1.41443	-1.54043	0.123455	0.489389	147.246	144.868	7.90592	56.2054	146.057	32.0556
FBgn0034399	CG15083	190.752	-0.657796	0.427543	-1.53855	0.123915	0.490664	152.505	175.741	136.659	73.9223	164.123	105.291
FBgn0003996	w	839.461	0.686756	0.446987	1.53641	0.124438	0.492183	602.133	630.53	1253.65	732.503	616.332	993.078
FBgn0033683	CG18343	80.0206	0.692393	0.45144	1.53374	0.125093	0.492571	84.1408	46.3101	114.071	91.0283	65.2255	102.55
FBgn0034572	CG9346	80.5768	-0.812652	0.529286	-1.53537	0.124692	0.492571	139.358	117.556	57.6003	87.3627	128.457	72.4815
FBgn0036763	TrpRS-m	74.1783	-0.780765	0.508748	-1.53468	0.124863	0.492571	70.9938	94.9951	55.3414	42.765	82.9945	49.0532
FBgn0042712	HBS1	86.2265	-0.635548	0.414271	-1.53413	0.124997	0.492571	102.547	136.556	85.8357	70.2567	119.551	78.0462
FBgn0013275	Hsp70Aa	126.577	-1.89646	1.23777	-1.53216	0.125483	0.493555	70.9938	108.057	6.7765	40.9322	89.5254	23.8543
FBgn0035533	Cip4	124.55	0.846812	0.553101	1.53103	0.125763	0.494109	99.9172	67.684	102.777	194.275	83.8006	148.526
FBgn0038320	Sra-1	159.8	0.445874	0.292161	1.52612	0.126979	0.497781	102.547	144.868	167.154	176.558	123.707	171.856
FBgn0265082	Cdep	91.3517	-0.726547	0.476041	-1.52623	0.126953	0.497781	115.694	141.305	60.9885	94.0829	128.499	77.5357
FBgn0037835	CG14687	135.835	0.602338	0.394903	1.52528	0.127189	0.497817	152.505	113.994	280.095	123.407	133.25	201.751
FBgn0051249	CG31249	64.3506	-0.575683	0.377508	-1.52496	0.12727	0.497817	73.6232	77.1836	64.3768	39.0994	75.4034	51.7381
FBgn0030791	CG9132	76.3459	0.815115	0.535444	1.52232	0.12793	0.499134	31.5528	48.685	62.1179	81.8643	40.1189	71.9911
FBgn0037891	CG5214	684.479	-0.557969	0.366556	-1.52219	0.127961	0.499134	439.11	545.035	388.519	282.86	492.072	335.69
FBgn0283461	Drs	251.898	1.72742	1.13503	1.52192	0.12803	0.499134	197.205	119.931	838.027	210.77	158.568	524.399
FBgn0004698	Xpc	79.4458	-0.558853	0.367422	-1.52101	0.128257	0.499466	157.764	83.1208	80.1886	78.8097	120.442	79.4992
FBgn0260970	Ubr3	246.293	-0.448091	0.294766	-1.52016	0.128471	0.499751	328.675	261.237	193.13	235.207	294.956	214.169
FBgn0004865	Eip78C	1165.69	-0.426054	0.280536	-1.51872	0.128834	0.500001	270.828	243.425	199.907	182.057	257.127	190.982
FBgn0010422	TfIIS	239.795	-0.405472	0.266988	-1.51869	0.128841	0.500001	368.116	295.672	265.413	233.374	331.894	249.394
FBgn0027552	CG10863	66.8025	0.855528	0.563716	1.51766	0.129101	0.500001	47.3292	49.8725	106.165	70.8676	48.6008	88.5164
FBgn0033341	MrgBP	100.874	-0.521828	0.343785	-1.51789	0.129042	0.500001	168.282	144.868	140.048	79.4206	156.575	109.734
FBgn0010772	Xe7	200.612	-0.594223	0.392863	-1.51255	0.130395	0.500082	362.857	210.177	152.471	222.378	286.517	187.425
FBgn0011290	Taf12	126.661	0.481815	0.318505	1.51274	0.130346	0.500082	102.547	106.87	155.86	138.07	104.708	146.965
FBgn0032138	CG4364	288.749	-0.461899	0.304962	-1.51461	0.129871	0.500082	336.563	289.735	213.46	238.873	313.149	226.166
FBgn0039026	CG7029	588.044	-0.48278	0.318928	-1.51376	0.130087	0.500082	683.644	583.033	425.79	478.357	633.338	452.073
FBgn0039214	puf	135.654	-0.558039	0.368489	-1.5144	0.129925	0.500082	181.429	123.494	82.4474	120.353	152.461	101.4
FBgn0083972	CG34136	249.102	0.776342	0.513208	1.51272	0.13035	0.500082	181.429	223.239	430.308	265.754	202.334	348.031
FBgn0260799	p120ctn	234.751	0.763059	0.503895	1.51432	0.129944	0.500082	157.764	165.054	241.695	306.075	161.409	273.885
FBgn0266720	Snap24	93.5137	0.703677	0.464434	1.51513	0.12974	0.500082	55.2174	71.2464	89.2239	118.52	63.2319	103.872
FBgn0284253	LeuRS	143.023	-0.491548	0.324396	-1.51527	0.129704	0.500082	126.211	99.7449	73.4121	84.308	112.978	78.8601
FBgn0001977	CIAPIN1	102.787	-0.556776	0.368442	-1.51116	0.130747	0.500891	134.099	119.931	100.518	72.7004	127.015	86.6093
FBgn0040493	grsm	209.507	-0.462129	0.306017	-1.51014	0.131008	0.501346	236.646	277.861	215.719	161.285	257.253	188.502
FBgn0001226	Hsp27	1698.52	-0.436524	0.290025	-1.50512	0.132292	0.502454	2053.56	1992.52	1337.23	1650.73	2023.04	1493.98
FBgn0021764	sdk	84.327	0.814425	0.54102	1.50535	0.132234	0.502454	57.8468	42.7478	38.4002	133.793	50.2973	86.0967
FBgn0023517	Pgam5	110.567	-0.440064	0.29224	-1.50583	0.132111	0.502454	97.2878	153.18	99.3887	91.0283	125.234	95.2085
FBgn0032943	Tsp39D	128.956	1.0502	0.697316	1.50606	0.132052	0.502454	107.805	66.4966	101.648	255.368	87.151	178.508
FBgn0036365	cmb	82.2061	-0.658383	0.437346	-1.50541	0.13222	0.502454	89.3996	87.8705	51.9532	59.8709	88.6351	55.9121
FBgn0038180	Cht5	766.845	0.850358	0.563846	1.50814	0.131519	0.502454	975.508	784.897	678.78	2491.36	880.203	1585.07
FBgn0021760	chb	78.0763	-0.570308	0.379854	-1.50139	0.133255	0.505028	86.7702	78.371	48.5649	61.0928	82.5706	54.8289
FBgn0024733	RpL10	8909.13	0.433053	0.288348	1.50184	0.133138	0.505028	6147.54	6989.27	11264.8	6477.67	6568.4	8871.24
FBgn0001145	Gs2	266.117	-0.482818	0.321907	-1.49987	0.133648	0.505433	210.352	232.738	159.248	158.841	221.545	159.045
FBgn0030870	CG6398	136.957	1.11508	0.743382	1.50001	0.133611	0.505433	73.6232	112.807	82.4474	322.57	93.215	202.509
FBgn0014011	Rac2	432.984	0.310938	0.207419	1.49908	0.133854	0.505669	404.928	435.79	522.92	522.954	420.359	522.937
FBgn0004395	unk	63.443	1.05386	0.704033	1.49689	0.134422	0.507276	36.8116	36.8106	63.2474	89.1955	36.8111	76.2214
FBgn0001258	Ldh	495.424	-0.831155	0.556109	-1.49459	0.135022	0.507617	331.305	440.54	289.131	146.623	385.922	217.877
FBgn0015283	Rpn10	392.431	-0.383037	0.256325	-1.49434	0.135087	0.507617	533.768	374.043	336.566	353.116	453.906	344.841
FBgn0028325	Pdha	411.479	-0.513318	0.343472	-1.4945	0.135046	0.507617	328.675	379.981	294.778	204.661	354.328	249.719
FBgn0035001	Slik	64.1297	-0.672925	0.450004	-1.49538	0.134816	0.507617	68.3644	94.9951	38.4002	64.1474	81.6798	51.2738
FBgn0266000	CG44774	177.681	-0.668751	0.44772	-1.49368	0.135259	0.507723	241.905	194.74	115.201	157.619	218.322	136.41
FBgn0034243	Ns2	192.311	-0.425693	0.285146	-1.49289	0.135465	0.507957	212.981	206.614	164.895	147.845	209.798	156.37
FBgn0033844	bbc	149.441	-0.476547	0.319451	-1.49177	0.135759	0.508152	186.687	140.118	90.3534	139.292	163.403	114.822
FBgn0038071	Dtg	256.119	0.474829	0.318335	1.4916	0.135804	0.508152	328.675	208.989	275.578	460.029	268.832	367.803
FBgn0003205	Ras85D	136.093	0.70881	0.47574	1.48991	0.136247	0.508252	131.47	104.495	140.048	241.927	117.982	190.988
FBgn0020309	crol	895.211	-0.353397	0.237274	-1.4894	0.136381	0.508252	1225.3	1263.44	888.851	1058.13	1244.37	973.489
FBgn0027841	CstF64	64.1712	-0.753408	0.505835	-1.48943	0.136373	0.508252	68.3644	96.1826	22.5883	73.9223	82.2735	48.2553
FBgn0029996	UbcE2H	459.056	0.391163	0.262687	1.48909	0.136465	0.508252	470.663	465.476	657.321	571.218	468.069	614.269
FBgn0036668	Zcchc7	91.7765	-0.584827	0.392827	-1.48876	0.136549	0.508252	199.834	118.744	94.871	113.633	159.289	104.252
FBgn0035763	mrva	205.037	0.563665	0.379139	1.4867	0.137095	0.509744	220.87	200.677	281.225	339.676	210.773	310.45
FBgn0010590	Prosbeta1	541.84	0.404953	0.273037	1.48314	0.138036	0.51056	436.481	426.291	693.462	451.476	431.386	572.469
FBgn0031909	CG5181	75.0733	0.641071	0.431704	1.48498	0.137549	0.51056	63.1056	70.0589	131.012	79.4206	66.5823	105.217
FBgn0032398	CG6766	86.7133	0.437823	0.295163	1.48333	0.137988	0.51056	70.9938	74.8087	96.0004	102.025	72.9013	99.0127
FBgn0042134	Capr	314.627	-0.380681	0.256606	-1.48353	0.137935	0.51056	352.34	453.602	266.542	354.338	402.971	310.44
FBgn0283478	und	433.521	0.478418	0.322494	1.48349	0.137944	0.51056	270.828	301.61	431.437	369	286.219	400.219
FBgn0025336	CG4882	172.506	-0.64497	0.435034	-1.48257	0.138188	0.510587	110.435	163.867	88.0945	89.1955	137.151	88.645
FBgn0014184	Oda	2326.52	0.408248	0.275816	1.48014	0.138835	0.511908	1840.58	1946.21	2388.72	2637.38	1893.4	2513.05
FBgn0026088	CG14818	361.224	0.638246	0.431103	1.4805	0.138741	0.511908	270.828	331.296	664.097	277.972	301.062	471.035
FBgn0034117	CG7997	133.605	0.894209	0.604524	1.47919	0.139088	0.512309	84.1408	113.994	184.095	186.333	99.0675	185.214
FBgn0013689	mt:tRNA:Ala-TGC	375.031	0.915673	0.619428	1.47825	0.13934	0.5127	147.246	360.982	747.674	218.712	254.114	483.193
FBgn0014028	SdhB	674.201	-0.527122	0.356979	-1.47662	0.139777	0.513243	528.51	591.345	485.649	294.467	559.927	390.058
FBgn0262527	nsl1	198.434	-0.514457	0.348317	-1.47698	0.139681	0.513243	252.422	241.05	172.801	172.282	246.736	172.541
FBgn0267350	PI4KIIIalpha	108.212	-0.58707	0.397838	-1.47565	0.140038	0.513666	197.205	132.993	119.718	98.3594	165.099	109.039
FBgn0035473	mge	551.422	-0.540785	0.366994	-1.47355	0.140603	0.515204	638.944	535.535	527.438	281.027	587.24	404.232
FBgn0042135	Gdap2	229.44	-0.476512	0.323571	-1.47267	0.140841	0.515544	260.311	260.049	163.765	208.937	260.18	186.351
FBgn0001225	Hsp26	7588.68	-0.751473	0.511733	-1.46849	0.141972	0.519144	3696.94	3649	2462.13	1901.82	3672.97	2181.97
FBgn0011754	PhKgamma	338.701	-0.59907	0.408725	-1.4657	0.142729	0.519819	381.263	403.729	278.966	240.095	392.496	259.53
FBgn0031263	Tspo	170.007	0.500922	0.341874	1.46523	0.142859	0.519819	197.205	161.492	312.849	193.664	179.348	253.256
FBgn0032924	Nbr	76.8897	0.721154	0.492186	1.4652	0.142865	0.519819	73.6232	54.6222	73.4121	133.793	64.1227	103.603
FBgn0037653	Iru	136.865	-0.521046	0.355636	-1.46511	0.142891	0.519819	128.841	135.368	105.036	80.6425	132.104	92.8391
FBgn0261822	Bsg	1873.47	-0.280217	0.19115	-1.46595	0.142662	0.519819	1514.53	1788.28	1460.34	1267.06	1651.41	1363.7
FBgn0034802	CNBP	4506.26	-0.347337	0.237268	-1.4639	0.143221	0.520482	5734.72	5494.28	4467.97	4357.75	5614.5	4412.86
FBgn0032233	dpr19	124.384	0.617211	0.422256	1.4617	0.143824	0.521607	78.882	110.432	154.73	139.902	94.6569	147.316
FBgn0035871	BI-1	286.474	0.346148	0.236813	1.46169	0.143825	0.521607	205.093	233.926	290.26	272.474	219.509	281.367
FBgn0034066	CG8397	95.0656	-0.588849	0.403342	-1.45992	0.144311	0.522832	102.547	86.6831	70.0239	55.5944	94.6149	62.8091
FBgn0002526	LanA	286.956	-0.404031	0.277729	-1.45477	0.145733	0.523203	323.416	308.734	230.401	246.204	316.075	238.303
FBgn0033556	CG12343	65.8101	0.692743	0.476306	1.45441	0.145833	0.523203	57.8468	39.1855	97.1299	57.4272	48.5162	77.2785
FBgn0037843	CG4511	1088.08	0.480328	0.329759	1.4566	0.145226	0.523203	951.843	992.699	1627.49	1088.06	972.271	1357.78
FBgn0046692	Stlk	72.1253	0.663285	0.45612	1.45419	0.145893	0.523203	49.9586	55.8096	79.0592	89.1955	52.8841	84.1273
FBgn0050410	Rpi	252.41	0.356407	0.244636	1.45689	0.145146	0.523203	210.352	236.3	328.66	249.259	223.326	288.959
FBgn0058263	MFS17	119.798	0.711613	0.487783	1.45887	0.1446	0.523203	70.9938	84.3082	158.118	98.9703	77.651	128.544
FBgn0263603	Zn72D	94.4694	-0.566058	0.388504	-1.45702	0.145111	0.523203	110.435	116.369	71.1533	81.8643	113.402	76.5088
FBgn0264489	CG43897	3229.83	-0.779123	0.535067	-1.45612	0.145359	0.523203	2750.35	3511.26	2223.82	1426.52	3130.81	1825.17
FBgn0266446	CG45076	771.832	-0.816197	0.561011	-1.45487	0.145706	0.523203	851.926	1047.32	644.897	434.981	949.624	539.939
FBgn0267698	Pak	86.8655	-0.488261	0.335701	-1.45445	0.145822	0.523203	163.023	96.1826	74.5415	103.858	129.603	89.1996
FBgn0035951	CG5068	132.031	0.613647	0.422152	1.45361	0.146053	0.523246	63.1056	102.12	161.507	98.3594	82.6127	129.933
FBgn0004838	Hrb27C	2622.77	-0.31211	0.214859	-1.45263	0.146326	0.523633	2655.69	2839.17	2041.99	2383.84	2747.43	2212.91
FBgn0028837	CSN6	141.994	0.503213	0.346681	1.45152	0.146636	0.523633	126.211	106.87	188.613	140.513	116.54	164.563
FBgn0037370	CG1236	268.202	0.52976	0.365147	1.45081	0.146832	0.523633	231.387	199.49	416.755	205.883	215.439	311.319
FBgn0058178	CG40178	90.1965	0.883384	0.608702	1.45126	0.146708	0.523633	47.3292	36.8106	79.0592	74.5332	42.0699	76.7962
FBgn0264490	Eip93F	1015.33	0.511616	0.352702	1.45056	0.146902	0.523633	1009.69	902.454	1088.76	1633.62	956.072	1361.19
FBgn0010388	Dro	158.766	1.86711	1.28859	1.44896	0.147348	0.524417	107.805	39.1855	487.908	45.8196	73.4955	266.864
FBgn0031143	CG1532	64.3628	0.672429	0.464157	1.44871	0.147418	0.524417	42.0704	40.3729	75.6709	56.2054	41.2217	65.9382
FBgn0031094	CG9578	108.631	0.581581	0.401915	1.44702	0.14789	0.525568	65.735	79.5584	128.754	92.2501	72.6467	110.502
FBgn0010278	Ssrp	181.521	-0.49185	0.340206	-1.44574	0.14825	0.525679	307.64	173.366	136.659	198.552	240.503	167.606
FBgn0026076	UBL3	133.646	0.492906	0.340982	1.44555	0.148303	0.525679	68.3644	112.807	121.977	139.902	90.5856	130.94
FBgn0030976	CG7378	114.158	-0.788396	0.546281	-1.44321	0.148962	0.525679	149.876	134.181	98.2593	66.5911	142.028	82.4252
FBgn0039126	CG13601	82.509	-0.609705	0.422317	-1.44371	0.148819	0.525679	81.5114	80.7459	65.5062	42.154	81.1287	53.8301
FBgn0039697	CG7834	584.646	0.435706	0.301813	1.44363	0.148844	0.525679	454.886	503.474	805.274	496.073	479.18	650.674
FBgn0262509	nrm	244.972	-0.450311	0.311655	-1.4449	0.148485	0.525679	202.464	249.362	181.836	152.121	225.913	166.979
FBgn0262736	Vha16-1	1464.26	0.329305	0.228157	1.44333	0.148928	0.525679	1001.8	1345.37	1471.63	1487.61	1173.59	1479.62
FBgn0040238	Best1	120.741	-0.583434	0.40465	-1.44182	0.149352	0.526529	49.9586	83.1208	42.9178	48.2633	66.5397	45.5906
FBgn0003890	betaTub97EF	85.1477	-0.654995	0.454595	-1.44083	0.149632	0.526767	52.588	75.9961	45.1767	38.4885	64.2921	41.8326
FBgn0037779	CG12811	124.525	0.651166	0.452032	1.44053	0.149717	0.526767	136.729	111.619	250.731	138.681	124.174	194.706
FBgn0015279	Pi3K92E	73.3523	0.559118	0.38935	1.43603	0.150994	0.530202	31.5528	61.7468	63.2474	80.6425	46.6498	71.9449
FBgn0086370	sra	135.424	0.571271	0.397753	1.43625	0.150932	0.530202	89.3996	90.2454	160.377	108.134	89.8225	134.256
FBgn0026196	nop5	387.518	-0.640054	0.447067	-1.43167	0.152237	0.530759	378.634	435.79	288.001	235.818	407.212	261.91
FBgn0027101	Dyrk3	192.336	0.412849	0.288469	1.43117	0.15238	0.530759	149.876	153.18	180.707	221.767	151.528	201.237
FBgn0028577	hfp	287.31	-0.48049	0.335104	-1.43385	0.151614	0.530759	315.528	375.231	241.695	254.757	345.379	248.226
FBgn0031043	Naa20A	255.552	-0.411054	0.286919	-1.43265	0.151959	0.530759	226.128	269.549	231.53	146.623	247.839	189.077
FBgn0031559	CG3513	194.294	0.982815	0.686925	1.43075	0.152503	0.530759	163.023	104.495	355.766	171.06	133.759	263.413
FBgn0034742	CG4294	107.047	-0.54534	0.380042	-1.43494	0.151303	0.530759	136.729	163.867	99.3887	107.523	150.298	103.456
FBgn0034975	enok	69.2846	-0.740905	0.51725	-1.43239	0.152032	0.530759	134.099	87.8705	31.6237	97.7485	110.985	64.6861
FBgn0038319	mRpL9	246.331	-0.644704	0.450452	-1.43124	0.152361	0.530759	228.758	235.113	196.519	102.025	231.935	149.272
FBgn0039600	CG1646	237.813	-0.482147	0.336331	-1.43355	0.151701	0.530759	247.164	325.358	164.895	245.593	286.261	205.244
FBgn0030433	mRpL49	201.292	0.672163	0.470022	1.43007	0.152698	0.530915	86.7702	116.369	236.048	92.861	101.57	164.455
FBgn0052698	CARPB	64.7982	0.729594	0.510541	1.42906	0.152987	0.531396	39.441	66.4966	124.236	57.4272	52.9688	90.8315
FBgn0005633	fln	288.064	-1.14209	0.802011	-1.42403	0.154437	0.531989	23.6646	78.371	37.2708	10.9967	51.0178	24.1337
FBgn0004509	Fur1	137.963	-0.583858	0.410077	-1.42378	0.154511	0.531989	84.1408	192.365	74.5415	113.022	138.253	93.7816
FBgn0015622	Cnx99A	547.324	-0.407425	0.286014	-1.42449	0.154304	0.531989	636.315	647.154	426.92	539.449	641.735	483.184
FBgn0015808	ScpX	94.1601	0.4565	0.320212	1.42562	0.153979	0.531989	81.5114	98.5575	151.342	101.414	90.0344	126.378
FBgn0027280	l(1)G0193	244.165	0.36613	0.256951	1.4249	0.154185	0.531989	223.499	262.424	367.061	266.365	242.962	316.713
FBgn0029133	REG	394.297	0.391396	0.274274	1.42703	0.153572	0.531989	247.164	376.418	466.449	363.502	311.791	414.976
FBgn0038738	CG4572	198.771	0.365705	0.256512	1.42568	0.15396	0.531989	181.429	166.242	210.072	234.596	173.835	222.334
FBgn0051855	CG31855	87.9161	0.484451	0.339746	1.42592	0.153891	0.531989	97.2878	80.7459	121.977	124.018	89.0169	122.998
FBgn0027616	Ythdc1	218.255	-0.437364	0.307372	-1.42291	0.154761	0.532331	365.487	229.176	184.095	248.037	297.331	216.066
FBgn0030451	CG15717	65.963	0.589146	0.414807	1.42029	0.155523	0.534431	47.3292	41.5604	74.5415	58.6491	44.4448	66.5953
FBgn0000711	flw	319.015	-0.450573	0.317496	-1.41915	0.155856	0.535056	333.934	356.232	249.601	255.979	345.083	252.79
FBgn0040394	CG16903	65.3161	-0.812714	0.573689	-1.41664	0.156587	0.537043	84.1408	70.0589	24.8472	61.0928	77.0999	42.97
FBgn0002121	l(2)gl	143.355	0.561408	0.400154	1.40298	0.160623	0.539013	84.1408	121.119	111.812	193.664	102.63	152.738
FBgn0002566	lt	120.304	0.436806	0.310778	1.40552	0.159865	0.539013	60.4762	117.556	131.012	121.575	89.0164	126.294
FBgn0010228	HmgZ	1912.92	0.350466	0.249828	1.40283	0.160667	0.539013	2182.4	2107.7	3615.26	1859.05	2145.05	2737.16
FBgn0010342	Map60	96.9474	0.556319	0.395524	1.40654	0.159565	0.539013	120.952	77.1836	121.977	162.507	99.068	142.242
FBgn0014343	mirr	128.628	-0.939746	0.66524	-1.41264	0.157761	0.539013	202.464	176.928	66.6356	130.128	189.696	98.3816
FBgn0015245	Hsp60A	1012.16	-0.651819	0.463603	-1.40599	0.159728	0.539013	844.038	904.829	609.885	504.016	874.433	556.95
FBgn0025390	Mur2B	101.604	-0.747467	0.532451	-1.40382	0.160371	0.539013	70.9938	79.5584	36.1413	53.1507	75.2761	44.646
FBgn0027537	Nup93-1	79.0372	0.603126	0.426734	1.41335	0.157553	0.539013	60.4762	75.9961	102.777	106.912	68.2362	104.845
FBgn0032421	crok	82.9256	0.718699	0.510985	1.4065	0.159576	0.539013	57.8468	62.9343	71.1533	127.073	60.3906	99.1131
FBgn0033241	CG2915	166.613	-0.405755	0.28918	-1.40312	0.160581	0.539013	149.876	156.742	96.0004	133.793	153.309	114.897
FBgn0034225	veil	123.04	-0.857598	0.60745	-1.4118	0.158009	0.539013	173.54	232.738	134.401	91.0283	203.139	112.714
FBgn0034401	MetRS	223.628	-0.571388	0.405275	-1.40988	0.158576	0.539013	186.687	212.552	138.918	130.739	199.62	134.828
FBgn0035318	CG9018	94.5404	-0.579929	0.410639	-1.41226	0.157873	0.539013	107.805	110.432	94.871	53.1507	109.119	74.0109
FBgn0035323	CG13807	115.332	-0.600593	0.427589	-1.4046	0.160139	0.539013	141.988	146.055	142.307	50.707	144.021	96.5068
FBgn0035333	CG1317	71.0044	-0.609941	0.433623	-1.40662	0.159541	0.539013	141.988	60.5594	46.3061	80.6425	101.274	63.4743
FBgn0035601	Uev1A	658.341	0.341392	0.243297	1.40319	0.160559	0.539013	475.922	562.846	787.204	537.617	519.384	662.41
FBgn0039632	Cul5	80.7584	-0.713982	0.508045	-1.40535	0.159917	0.539013	163.023	66.4966	54.212	81.8643	114.76	68.0382
FBgn0039831	CG12054	357.501	-0.451454	0.321676	-1.40344	0.160485	0.539013	370.746	328.921	276.707	234.596	349.833	255.652
FBgn0040321	GNBP3	80.9471	0.83261	0.59091	1.40903	0.158826	0.539013	94.6584	52.2473	108.424	148.455	73.4529	128.44
FBgn0040398	CG14629	356.112	0.647954	0.458319	1.41376	0.157432	0.539013	270.828	289.735	525.179	354.949	280.282	440.064
FBgn0042138	CG18815	134.954	0.437582	0.311847	1.40319	0.160559	0.539013	55.2174	117.556	120.848	125.24	86.387	123.044
FBgn0051374	sals	432.496	-0.449363	0.318754	-1.40975	0.158613	0.539013	573.209	471.413	376.096	386.717	522.311	381.407
FBgn0261444	CG3638	183.014	0.475878	0.338064	1.40766	0.159233	0.539013	131.47	184.053	187.483	255.368	157.762	221.426
FBgn0025455	CycT	282.176	-0.453968	0.323882	-1.40165	0.161021	0.53954	360.228	286.173	190.871	276.75	323.2	233.811
FBgn0083961	CG34125	80.3194	0.642545	0.458541	1.40128	0.161129	0.53954	52.588	59.372	97.1299	79.4206	55.98	88.2752
FBgn0039213	atl	142.217	0.412402	0.294734	1.39923	0.161743	0.541082	102.547	106.87	152.471	128.295	104.708	140.383
FBgn0000454	Dip-B	601.898	0.553219	0.396148	1.3965	0.162565	0.541346	486.439	445.29	760.098	606.651	465.864	683.375
FBgn0002174	CG5504	176.788	-0.890591	0.637766	-1.39642	0.162588	0.541346	128.841	175.741	109.553	56.2054	152.291	82.8794
FBgn0033005	CG3107	206.552	0.57405	0.410862	1.39718	0.162358	0.541346	94.6584	141.305	210.072	147.234	117.982	178.653
FBgn0038046	CG5641	327.622	-0.360817	0.258096	-1.398	0.162114	0.541346	499.586	425.103	381.743	336.621	462.345	359.182
FBgn0250843	Prosalpha6	471.642	0.353543	0.252955	1.39766	0.162216	0.541346	389.151	370.481	565.838	406.267	379.816	486.052
FBgn0031711	CG6907	81.2769	-0.58301	0.417706	-1.39574	0.162792	0.541517	118.323	100.932	62.1179	82.4753	109.628	72.2966
FBgn0038080	CG12279	71.5232	0.721604	0.517342	1.39483	0.163067	0.541922	44.6998	52.2473	91.4828	70.2567	48.4736	80.8697
FBgn0002645	Map205	1067.46	-0.459096	0.329482	-1.39339	0.163503	0.542861	1106.98	1107.88	882.075	730.059	1107.43	806.067
FBgn0058160	CG40160	113.996	0.543553	0.390499	1.39195	0.163939	0.543798	39.441	83.1208	75.6709	109.967	61.2809	92.819
FBgn0004915	TfIIB	149.874	0.388105	0.279154	1.39029	0.164441	0.544711	128.841	134.181	194.26	152.732	131.511	173.496
FBgn0030114	CG17754	636.973	0.493622	0.355119	1.39002	0.164523	0.544711	775.673	560.471	687.815	1185.81	668.072	936.813
FBgn0013263	Trl	140.105	0.576216	0.41495	1.38864	0.164942	0.54508	63.1056	142.493	144.565	170.449	102.799	157.507
FBgn0034753	CG2852	1966.35	0.407582	0.293427	1.38904	0.16482	0.54508	2106.15	2068.52	2440.67	3094.96	2087.33	2767.82
FBgn0000479	dnc	311.287	-0.522449	0.377111	-1.3854	0.165931	0.546437	362.857	465.476	297.037	281.638	414.167	289.337
FBgn0004397	Vinc	105.698	-0.514921	0.371698	-1.38532	0.165954	0.546437	113.064	112.807	57.6003	98.3594	112.935	77.9798
FBgn0033446	CG1648	579.089	-0.460064	0.332298	-1.38449	0.166208	0.546437	402.298	505.849	377.225	286.525	454.074	331.875
FBgn0035499	Chd64	110.58	0.510595	0.368859	1.38426	0.16628	0.546437	105.176	97.37	175.06	114.244	101.273	144.652
FBgn0035631	Txl	376.284	-0.406665	0.293602	-1.38509	0.166025	0.546437	515.363	381.168	347.86	325.014	448.265	336.437
FBgn0039955	CG41099	65.9176	0.609126	0.439757	1.38514	0.166009	0.546437	42.0704	41.5604	56.4709	70.2567	41.8154	63.3638
FBgn0033381	GstE13	76.6867	0.48634	0.35162	1.38314	0.166621	0.546542	70.9938	39.1855	76.8004	69.6458	55.0897	73.2231
FBgn0261113	Xrp1	404.399	-0.494214	0.357289	-1.38323	0.166593	0.546542	496.957	306.359	304.943	262.088	401.658	283.515
FBgn0030648	CG6340	147.264	0.511284	0.370257	1.38089	0.167314	0.548012	97.2878	148.43	188.613	168.005	122.859	178.309
FBgn0035959	CG4911	104.307	0.487368	0.352993	1.38067	0.167379	0.548012	102.547	86.6831	128.754	133.793	94.6149	131.273
FBgn0265274	Inx3	362.624	0.904438	0.655635	1.37948	0.167746	0.548703	326.046	254.112	213.46	869.35	290.079	541.405
FBgn0004910	Eip63F-1	488.391	0.898084	0.651444	1.37861	0.168016	0.548727	81.5114	117.556	263.154	111.189	99.534	187.172
FBgn0031544	CG17593	129.077	0.448134	0.325099	1.37845	0.168063	0.548727	44.6998	90.2454	86.9651	106.301	67.4726	96.6333
FBgn0017572	Mo25	207.968	0.410384	0.298014	1.37706	0.168493	0.549502	149.876	198.302	229.272	238.873	174.089	234.072
FBgn0020510	Abi	90.1129	0.459739	0.334069	1.37618	0.168767	0.549502	57.8468	68.8715	72.2827	102.636	63.3592	87.4593
FBgn0036433	CG9628	124.485	0.994127	0.722255	1.37642	0.168692	0.549502	110.435	65.3092	105.036	241.317	87.872	173.176
FBgn0000046	Act87E	1205.79	-0.401516	0.292296	-1.37366	0.169547	0.549566	1887.91	1466.49	1359.82	1177.26	1677.2	1268.54
FBgn0031632	CG15628	90.1717	-0.592988	0.431754	-1.37344	0.169616	0.549566	157.764	106.87	84.7063	88.5845	132.317	86.6454
FBgn0031776	Pfdn1	408.133	0.560425	0.407775	1.37435	0.169333	0.549566	297.122	391.855	772.521	250.48	344.489	511.501
FBgn0034976	CG4049	65.8523	-0.644608	0.469366	-1.37336	0.169641	0.549566	113.064	60.5594	40.659	66.5911	86.8118	53.6251
FBgn0036821	CG3961	122.381	0.621869	0.453057	1.37261	0.169874	0.549566	105.176	106.87	182.966	144.179	106.023	163.572
FBgn0039019	HP1c	189.162	0.40677	0.295787	1.37521	0.169066	0.549566	139.358	216.114	302.684	180.835	177.736	241.759
FBgn0264090	CG43759	94.6486	-0.713253	0.51961	-1.37267	0.169855	0.549566	118.323	67.684	35.0119	75.1441	93.0035	55.078
FBgn0039691	IntS11	64.4281	-0.589415	0.429929	-1.37096	0.170388	0.550722	94.6584	91.4328	46.3061	75.7551	93.0456	61.0306
FBgn0004647	N	193.731	0.882734	0.644623	1.36938	0.170881	0.551004	110.435	178.116	123.106	410.544	144.275	266.825
FBgn0025716	Bap55	67.5934	0.494133	0.36124	1.36788	0.171349	0.551004	52.588	78.371	93.7416	95.9157	65.4795	94.8286
FBgn0031286	CG3862	78.2454	-0.606108	0.442943	-1.36836	0.171198	0.551004	107.805	127.056	92.6122	63.5365	117.431	78.0743
FBgn0038659	EndoA	92.9966	0.598006	0.437075	1.3682	0.17125	0.551004	81.5114	51.0599	66.6356	127.073	66.2857	96.8543
FBgn0050197	CG30197	108.214	0.75421	0.550695	1.36956	0.170824	0.551004	97.2878	65.3092	163.765	108.134	81.2985	135.95
FBgn0050359	Mal-A5	233.398	0.562611	0.411359	1.36769	0.17141	0.551004	194.576	229.176	409.978	219.934	211.876	314.956
FBgn0000114	bru1	10257.1	-0.70032	0.513758	-1.36313	0.172841	0.553777	8663.88	13078.5	7917.21	5465.97	10871.2	6691.59
FBgn0001189	hfw	96.6014	0.51302	0.376211	1.36365	0.172678	0.553777	44.6998	73.6212	66.6356	106.301	59.1605	86.4685
FBgn0003016	osp	283.895	-0.489601	0.359456	-1.36206	0.173178	0.553777	357.599	336.045	231.53	261.477	346.822	246.504
FBgn0030136	RpS28b	4336.9	0.39357	0.28908	1.36146	0.173369	0.553777	3365.63	3593.19	5927.18	3219.59	3479.41	4573.39
FBgn0038912	CG6656	111.327	-0.629701	0.462416	-1.36176	0.173273	0.553777	144.617	121.119	101.648	70.2567	132.868	85.9521
FBgn0260012	pds5	115.066	-0.41367	0.303796	-1.36167	0.173302	0.553777	141.988	129.431	72.2827	127.073	135.709	99.6778
FBgn0261563	wb	113.69	-0.712857	0.523233	-1.36241	0.173069	0.553777	147.246	169.804	70.0239	122.797	158.525	96.4102
FBgn0266917	Sf3a1	77.1886	0.414411	0.304763	1.35978	0.173899	0.554971	78.882	58.1845	70.0239	104.469	68.5333	87.2463
FBgn0032129	jp	876.712	-0.644023	0.473817	-1.35922	0.174076	0.555033	641.574	859.706	594.073	369	750.64	481.537
FBgn0016698	Ptpa	100.91	-0.526249	0.38753	-1.35796	0.174478	0.555477	107.805	85.4956	79.0592	54.9835	96.6505	67.0214
FBgn0061492	loj	66.7125	0.889935	0.655427	1.35779	0.174529	0.555477	36.8116	48.685	65.5062	94.0829	42.7483	79.7945
FBgn0016978	snRNP-U1-70K	159.719	-0.520031	0.383396	-1.35638	0.174978	0.556313	160.393	195.927	117.459	131.96	178.16	124.71
FBgn0017545	RpS3A	7431.65	0.351529	0.259717	1.35351	0.175893	0.556313	5340.31	6308.87	9261.22	5610.76	5824.59	7435.99
FBgn0032229	CG5045	184.027	0.415074	0.306585	1.35386	0.175779	0.556313	115.694	170.991	233.789	158.23	143.342	196.01
FBgn0033688	Prp8	236.734	-0.599793	0.442754	-1.35469	0.175517	0.556313	386.522	298.047	211.201	238.873	342.285	225.037
FBgn0051549	CG31549	71.156	0.542999	0.400719	1.35506	0.175397	0.556313	44.6998	73.6212	102.777	76.366	59.1605	89.5715
FBgn0261985	Ptpmeg	120.018	-0.460157	0.339799	-1.3542	0.175672	0.556313	218.24	137.743	116.33	137.459	177.992	126.894
FBgn0265935	coro	427.749	-0.599105	0.442462	-1.35403	0.175728	0.556313	431.222	527.223	348.99	285.303	479.222	317.147
FBgn0262362	CG43060	256.41	0.729792	0.539441	1.35287	0.176098	0.556464	231.387	200.677	524.05	193.053	216.032	358.551
FBgn0085442	NKAIN	222.684	-0.334678	0.247554	-1.35194	0.176395	0.556903	239.275	267.174	170.542	230.32	253.225	200.431
FBgn0083228	Frq2	264.607	-0.693051	0.512984	-1.35102	0.176689	0.557336	65.735	92.6203	57.6003	42.154	79.1776	49.8771
FBgn0028969	deltaCOP	184.199	-0.309938	0.229642	-1.34966	0.177126	0.557374	234.017	200.677	164.895	181.446	217.347	173.17
FBgn0032704	Jwa	254.32	0.303686	0.225148	1.34883	0.177393	0.557374	191.946	211.364	238.307	261.477	201.655	249.892
FBgn0032820	fbp	250.688	0.478408	0.354308	1.35026	0.176933	0.557374	168.282	281.423	395.296	241.317	224.852	318.306
FBgn0034849	CG3500	93.1966	0.657273	0.48706	1.34947	0.177186	0.557374	31.5528	83.1208	106.165	83.0862	57.3368	94.6257
FBgn0263980	Stacl	115.934	-1.22399	0.907654	-1.34852	0.17749	0.557374	31.5528	32.0609	19.2001	8.55299	31.8068	13.8765
FBgn0003941	RpL40	6280.87	0.322132	0.239471	1.34518	0.178566	0.558361	4619.86	5325.67	7717.31	4725.53	4972.76	6221.42
FBgn0004436	Ubc6	354.62	0.381098	0.284125	1.3413	0.179822	0.558361	283.975	309.922	454.026	323.792	296.948	388.909
FBgn0020224	Cbl	130.227	0.541575	0.4026	1.3452	0.178562	0.558361	92.029	118.744	154.73	155.176	105.386	154.953
FBgn0025630	Rtca	88.7962	-0.609511	0.452795	-1.34611	0.178268	0.558361	163.023	98.5575	109.553	61.0928	130.79	85.3231
FBgn0026409	Mpcp2	195.841	-0.370926	0.275896	-1.34444	0.178806	0.558361	286.605	274.298	179.577	251.091	280.452	215.334
FBgn0026761	Trap1	92.6314	-0.633526	0.472331	-1.34128	0.179831	0.558361	94.6584	91.4328	74.5415	46.4305	93.0456	60.486
FBgn0028694	Rpn11	419.192	-0.278582	0.207445	-1.34292	0.179297	0.558361	578.468	527.223	557.932	356.782	552.846	457.357
FBgn0032429	CG5446	196.255	0.478344	0.356379	1.34223	0.17952	0.558361	197.205	180.491	319.625	207.105	188.848	263.365
FBgn0032465	Yip1d1	85.3721	0.535359	0.399153	1.34124	0.179843	0.558361	78.882	62.9343	123.106	81.2534	70.9082	102.18
FBgn0038013	CG10038	67.7321	-0.631341	0.469935	-1.34347	0.179121	0.558361	36.8116	99.7449	47.4355	44.5977	68.2783	46.0166
FBgn0038870	Oga	101.632	-0.472887	0.351671	-1.34469	0.178726	0.558361	202.464	119.931	77.9298	147.234	161.198	112.582
FBgn0040206	krz	84.9955	0.718166	0.535467	1.3412	0.179857	0.558361	47.3292	54.6222	81.318	87.3627	50.9757	84.3404
FBgn0260972	alc	125.093	0.38014	0.28308	1.34287	0.179313	0.558361	92.029	78.371	108.424	109.967	85.2	109.196
FBgn0028982	Spt6	75.6611	-0.738016	0.551029	-1.33934	0.180459	0.558377	97.2878	79.5584	29.3648	74.5332	88.4231	51.949
FBgn0035720	CG10077	1159.2	-0.391332	0.291972	-1.3403	0.180147	0.558377	1262.11	1325.18	779.298	1191.31	1293.65	985.304
FBgn0261278	grp	173.449	0.607604	0.453554	1.33965	0.180359	0.558377	152.505	163.867	196.519	285.303	158.186	240.911
FBgn0262515	VhaAC45	196.663	0.45574	0.340298	1.33924	0.180493	0.558377	76.2526	195.927	213.46	174.725	136.09	194.093
FBgn0260936	scny	155.304	-0.393232	0.29422	-1.33653	0.181377	0.560621	176.17	195.927	160.377	125.851	186.049	143.114
FBgn0032305	CG6700	145.806	-0.492249	0.36848	-1.33589	0.181584	0.56077	123.582	211.364	102.777	138.07	167.473	120.423
FBgn0051451	lncRNA:CR31451	377.277	-0.77899	0.58345	-1.33514	0.181829	0.561036	431.222	368.106	213.46	251.702	399.664	232.581
FBgn0032248	Bug22	78.1126	0.612554	0.459288	1.3337	0.182301	0.561704	49.9586	70.0589	123.106	65.3693	60.0088	94.2379
FBgn0038810	Srp72	97.6589	-0.616628	0.462408	-1.33351	0.182363	0.561704	147.246	122.306	86.9651	87.9736	134.776	87.4694
FBgn0002914	Myb	96.4134	0.572246	0.429372	1.33275	0.182614	0.561987	57.8468	92.6203	80.1886	146.623	75.2335	113.406
FBgn0259481	Mob2	141.197	-0.462168	0.346912	-1.33223	0.182783	0.562019	184.058	156.742	110.683	134.404	170.4	122.544
FBgn0035237	CG13917	359.584	-0.471954	0.354589	-1.33099	0.183192	0.562788	549.545	447.665	294.778	420.929	498.605	357.854
FBgn0000579	Eno	4928.06	-0.468635	0.352236	-1.33046	0.183367	0.562836	5632.18	5729.39	4880.21	3332	5680.79	4106.11
FBgn0029766	CG15784	117.323	-0.693498	0.521918	-1.32875	0.18393	0.563654	199.834	136.556	127.624	80.0316	168.195	103.828
FBgn0034432	CG7461	168.928	-0.437	0.328897	-1.32868	0.183953	0.563654	268.199	200.677	179.577	164.34	234.438	171.958
FBgn0015737	Hmu	77.2784	0.718104	0.540669	1.32818	0.18412	0.563679	65.735	66.4966	63.2474	152.732	66.1158	107.99
FBgn0005672	spi	234.317	0.49342	0.372213	1.32564	0.184959	0.563997	165.652	166.242	175.06	290.191	165.947	232.625
FBgn0034537	DMAP1	66.8086	-0.644918	0.486565	-1.32545	0.185022	0.563997	131.47	73.6212	70.0239	59.26	102.546	64.6419
FBgn0039266	CG11791	300.063	0.389441	0.293627	1.32631	0.184736	0.563997	215.611	246.987	317.366	292.024	231.299	304.695
FBgn0262582	cic	185.3	0.498702	0.375926	1.3266	0.184642	0.563997	115.694	191.178	181.836	257.201	153.436	219.518
FBgn0262739	AGO1	1019.82	-0.376515	0.283817	-1.32661	0.184637	0.563997	1012.32	960.638	623.438	893.177	986.479	758.307
FBgn0264693	ens	531.762	-0.498637	0.37646	-1.32454	0.185324	0.564431	552.174	745.712	460.802	460.029	648.943	460.415
FBgn0024196	robl	113.498	0.528669	0.399281	1.32405	0.185485	0.564437	81.5114	118.744	184.095	111.189	100.128	147.642
FBgn0000299	Col4a1	106.225	-0.633759	0.482228	-1.31423	0.188769	0.568943	236.646	116.369	123.106	102.025	176.508	112.566
FBgn0002562	Lsp1alpha	832.612	1.62816	1.24224	1.31067	0.189971	0.568943	381.263	1030.7	4187.88	180.224	705.98	2184.05
FBgn0004167	kst	95.2833	-0.632526	0.480954	-1.31515	0.188459	0.568943	157.764	124.681	82.4474	98.3594	141.223	90.4034
FBgn0005777	PpD3	141.987	0.383667	0.291934	1.31423	0.18877	0.568943	123.582	90.2454	141.177	131.96	106.914	136.569
FBgn0022029	l(2)k01209	200.823	-0.428022	0.326074	-1.31265	0.189301	0.568943	165.652	159.117	136.659	105.691	162.385	121.175
FBgn0023167	SmD3	214.555	-0.401958	0.304778	-1.31885	0.187218	0.568943	276.087	204.24	207.813	153.954	240.163	180.883
FBgn0026319	Traf4	159.676	0.560567	0.427747	1.31051	0.190023	0.568943	128.841	200.677	196.519	293.245	164.759	244.882
FBgn0028471	Nab2	79.7099	-0.420544	0.319634	-1.31571	0.188273	0.568943	107.805	79.5584	67.765	69.0349	93.6819	68.3999
FBgn0032713	Ugt36D1	67.6852	0.693368	0.526142	1.31783	0.187559	0.568943	23.6646	78.371	96.0004	77.5878	51.0178	86.7941
FBgn0033669	PI31	110.809	0.35716	0.271225	1.31684	0.187893	0.568943	97.2878	96.1826	118.589	128.295	96.7352	123.442
FBgn0033915	CG8485	75.8814	-0.67851	0.516563	-1.31351	0.189012	0.568943	152.505	83.1208	66.6356	78.1988	117.813	72.4172
FBgn0035675	CG6610	98.9283	0.598305	0.454983	1.315	0.188509	0.568943	68.3644	70.0589	138.918	72.7004	69.2117	105.809
FBgn0036580	PDCD-5	328.306	-0.45405	0.346426	-1.31067	0.189969	0.568943	362.857	377.606	315.107	227.265	370.232	271.186
FBgn0036746	Crtc	218.21	-0.499945	0.380602	-1.31356	0.188993	0.568943	223.499	227.988	125.365	192.442	225.744	158.904
FBgn0036928	Tom20	359.965	0.479617	0.365149	1.31348	0.189021	0.568943	191.946	276.673	446.12	215.658	234.31	330.889
FBgn0038683	CG11779	172.165	-0.584446	0.445088	-1.3131	0.189149	0.568943	89.3996	178.116	106.165	76.366	133.758	91.2656
FBgn0086680	vvl	103.717	0.92849	0.707882	1.31164	0.18964	0.568943	123.582	66.4966	64.3768	292.634	95.0392	178.506
FBgn0260011	NimC4	118.781	0.842905	0.642422	1.31207	0.189495	0.568943	110.435	86.6831	145.695	205.883	98.559	175.789
FBgn0265137	Spn42Da	104.579	0.48228	0.366227	1.31689	0.187876	0.568943	102.547	86.6831	137.789	124.629	94.6149	131.209
FBgn0004396	CrebA	141.234	0.615885	0.470149	1.30998	0.190203	0.569	113.064	85.4956	93.7416	205.883	99.2799	149.812
FBgn0033539	Git	159.947	-0.379833	0.290348	-1.3082	0.190805	0.570318	176.17	191.178	167.154	118.52	183.674	142.837
FBgn0032246	Wdfy2	184.918	0.382439	0.292475	1.30759	0.191011	0.570452	155.135	143.68	202.166	186.333	149.407	194.249
FBgn0000412	D1	881.287	-0.336434	0.25754	-1.30634	0.191438	0.570515	1440.91	1107.88	910.31	1102.11	1274.4	1006.21
FBgn0022213	Cse1	116.349	0.489976	0.37543	1.30511	0.191856	0.570515	97.2878	96.1826	145.695	126.462	96.7352	136.078
FBgn0034046	tun	233.397	0.431699	0.330846	1.30483	0.19195	0.570515	215.611	246.987	360.284	267.586	231.299	313.935
FBgn0035088	CG3776	207.15	-0.549299	0.421021	-1.30468	0.192	0.570515	270.828	243.425	245.083	108.134	257.127	176.609
FBgn0037913	fabp	1224.59	0.606145	0.464203	1.30578	0.191629	0.570515	849.296	1040.2	1939.21	940.829	944.747	1440.02
FBgn0041184	Socs36E	83.7449	-0.561937	0.430543	-1.30518	0.191831	0.570515	99.9172	134.181	68.8944	90.4173	117.049	79.6559
FBgn0266717	Bruce	166.601	-0.448428	0.34405	-1.30338	0.192445	0.571356	249.793	188.803	109.553	206.494	219.298	158.024
FBgn0039379	CG5886	461.186	-0.58027	0.445716	-1.30188	0.192956	0.571485	652.091	573.533	469.837	350.062	612.812	409.95
FBgn0052479	Usp10	339.821	0.513121	0.394152	1.30183	0.192973	0.571485	165.652	268.361	301.554	323.792	217.007	312.673
FBgn0259483	Mob4	299.407	-0.264837	0.203355	-1.30234	0.1928	0.571485	286.605	434.603	319.625	293.245	360.604	306.435
FBgn0024362	Naa30A	171.152	0.460181	0.35424	1.29907	0.193921	0.57381	65.735	144.868	145.695	154.565	105.301	150.13
FBgn0030263	CG2076	215.894	-0.311494	0.23993	-1.29827	0.194195	0.57414	210.352	231.551	172.801	184.5	220.951	178.651
FBgn0001149	GstD1	1668.91	0.257943	0.198853	1.29715	0.194579	0.574246	1522.42	1458.18	2041.99	1524.27	1490.3	1783.13
FBgn0033735	Dera	119.275	0.40038	0.308757	1.29675	0.194718	0.574246	97.2878	77.1836	134.401	94.0829	87.2357	114.242
FBgn0038426	mRpS33	108.949	0.645142	0.497298	1.2973	0.19453	0.574246	47.3292	75.9961	129.883	68.4239	61.6627	99.1534
FBgn0035251	Vta1	256.217	0.361879	0.279319	1.29558	0.195121	0.574479	176.17	281.423	352.378	248.648	228.796	300.513
FBgn0263351	AP-2mu	69.3109	0.540651	0.417298	1.2956	0.195114	0.574479	13.147	52.2473	42.9178	61.7037	32.6972	52.3108
FBgn0039908	Asator	134.865	-0.411532	0.317891	-1.29457	0.195468	0.57502	147.246	143.68	105.036	113.022	145.463	109.029
FBgn0019660	lncRNA:roX2	295.433	1.39167	1.07842	1.29047	0.196889	0.575688	136.729	169.804	441.602	363.502	153.266	402.552
FBgn0026263	bip1	191.098	0.469088	0.363609	1.29009	0.19702	0.575688	255.052	185.241	250.731	352.505	220.146	301.618
FBgn0027598	cindr	137.786	0.474915	0.368042	1.29038	0.196918	0.575688	99.9172	110.432	149.083	144.79	105.175	146.936
FBgn0031312	Tango14	68.0669	-0.665617	0.516354	-1.28907	0.197374	0.575688	92.029	71.2464	55.3414	47.0414	81.6377	51.1914
FBgn0031814	retm	81.7267	0.730802	0.566782	1.28939	0.197263	0.575688	49.9586	67.684	97.1299	100.192	58.8213	98.661
FBgn0032988	Tif-IA	203.794	0.556954	0.431856	1.28967	0.197164	0.575688	86.7702	159.117	208.942	160.063	122.944	184.503
FBgn0036500	CG7275	68.7624	-0.712403	0.551417	-1.29195	0.196375	0.575688	84.1408	55.8096	44.0473	40.3212	69.9752	42.1843
FBgn0051998	CG31998	137.436	0.478679	0.370267	1.2928	0.196082	0.575688	113.064	83.1208	102.777	164.34	98.0925	133.558
FBgn0052068	Adi1	81.488	0.648312	0.503138	1.28854	0.197559	0.575688	97.2878	36.8106	127.624	75.7551	67.0492	101.69
FBgn0261617	nej	309.437	-0.470995	0.365733	-1.28781	0.197811	0.575688	397.04	267.174	221.366	254.146	332.107	237.756
FBgn0266101	CG44838	187.733	-0.458542	0.355697	-1.28914	0.197351	0.575688	255.052	218.489	120.848	219.934	236.77	170.391
FBgn0267727	Pen	178.027	-0.692567	0.537734	-1.28794	0.197768	0.575688	378.634	301.61	161.507	257.812	340.122	209.659
FBgn0268063	ltl	262.685	-0.579716	0.449422	-1.28992	0.19708	0.575688	454.886	578.283	309.46	382.441	516.585	345.951
FBgn0031977	baf	105.998	0.513601	0.399258	1.28639	0.198307	0.576657	99.9172	115.182	177.318	132.571	107.549	154.945
FBgn0013681	mt:ND3	261.525	0.693344	0.539985	1.28401	0.19914	0.577512	120.952	263.612	472.096	157.619	192.282	314.858
FBgn0025456	CREG	941.426	0.502538	0.391483	1.28368	0.199255	0.577512	738.862	1028.32	1551.82	957.935	883.592	1254.88
FBgn0064225	RpL5	10334.3	0.327713	0.255132	1.28449	0.198972	0.577512	7804.06	8684.93	12445	8255.47	8244.5	10350.3
FBgn0086683	Spf45	92.227	0.507086	0.394791	1.28444	0.198987	0.577512	86.7702	46.3101	100.518	81.8643	66.5402	91.1912
FBgn0036974	eRF1	413.81	0.391894	0.30547	1.28292	0.199519	0.577805	347.081	315.859	440.473	427.65	331.47	434.061
FBgn0010222	Nmdmc	84.8678	0.565843	0.442905	1.27757	0.2014	0.578973	115.694	73.6212	145.695	130.128	94.6574	137.911
FBgn0024273	WASp	71.4363	-0.638354	0.498761	-1.27988	0.200588	0.578973	68.3644	99.7449	41.7884	66.5911	84.0547	54.1898
FBgn0028980	tant	174.249	0.46416	0.362432	1.28068	0.200306	0.578973	247.164	143.68	249.601	281.027	195.422	265.314
FBgn0030969	Usp39	78.8305	-0.496093	0.388447	-1.27712	0.20156	0.578973	115.694	118.744	81.318	84.919	117.219	83.1185
FBgn0033357	Tom7	157.233	0.680781	0.532808	1.27772	0.201347	0.578973	86.7702	89.058	204.424	79.4206	87.9141	141.923
FBgn0036136	Ufd1-like	135.399	0.352865	0.276199	1.27757	0.2014	0.578973	126.211	98.5575	141.177	140.513	112.384	140.845
FBgn0036666	TSG101	127.257	0.440371	0.344192	1.27943	0.200745	0.578973	97.2878	93.8077	129.883	128.906	95.5478	129.394
FBgn0261931	CG42797	94.8904	-0.589512	0.460092	-1.28129	0.200092	0.578973	131.47	132.993	111.812	65.3693	132.232	88.5908
FBgn0261995	CG42813	69.2203	-0.607433	0.475444	-1.27761	0.201386	0.578973	102.547	47.4976	53.0826	42.765	75.0221	47.9238
FBgn0034462	CG15905	87.8229	1.10549	0.866962	1.27513	0.202265	0.579957	144.617	61.7468	70.0239	369.611	103.182	219.818
FBgn0035997	phol	88.6547	-0.440527	0.345417	-1.27535	0.202185	0.579957	160.393	98.5575	76.8004	108.134	129.475	92.4673
FBgn0036290	CG10638	259.763	0.378069	0.296645	1.27448	0.202493	0.579957	197.205	197.115	288.001	226.043	197.16	257.022
FBgn0039914	mav	106.141	0.645989	0.506938	1.2743	0.202558	0.579957	73.6232	52.2473	50.8238	141.124	62.9353	95.9741
FBgn0030460	Coq5	63.5328	0.743491	0.584054	1.27298	0.203024	0.58082	26.294	34.4357	75.6709	29.3245	30.3649	52.4977
FBgn0032600	BuGZ	367.374	-0.371036	0.291701	-1.27197	0.203383	0.581376	383.893	402.542	254.119	352.505	393.217	303.312
FBgn0043884	mask	307.061	-0.434098	0.341456	-1.27131	0.203618	0.581577	378.634	306.359	219.107	284.692	342.497	251.9
FBgn0017558	Pdk	136.577	0.446376	0.351986	1.26816	0.20474	0.583684	126.211	102.12	146.824	160.674	114.166	153.749
FBgn0030089	AP-1gamma	104.5	-0.484777	0.382083	-1.26877	0.204522	0.583684	149.876	81.9333	73.4121	87.3627	115.905	80.3874
FBgn0031008	CG8010	85.2217	-0.716653	0.565402	-1.26751	0.204973	0.583684	68.3644	97.37	65.5062	37.2666	82.8672	51.3864
FBgn0243516	Vrp1	658.162	0.459029	0.362274	1.26708	0.205127	0.583684	725.715	732.65	1063.91	941.44	729.182	1002.68
FBgn0284257	Ttd14	259.97	-0.472012	0.372564	-1.26693	0.205181	0.583684	310.269	271.924	222.495	196.719	291.096	209.607
FBgn0015513	mbc	118.898	0.486421	0.384164	1.26618	0.205449	0.583978	123.582	128.243	167.154	185.722	125.913	176.438
FBgn0024432	Dlc90F	212.141	0.349192	0.275893	1.26568	0.205628	0.584017	207.723	244.613	362.543	221.156	226.168	291.849
FBgn0000636	Fas3	476.431	0.727742	0.575786	1.26391	0.206262	0.584427	344.452	207.802	153.601	755.107	276.127	454.354
FBgn0011766	E2f1	860.243	-0.340619	0.269384	-1.26444	0.206073	0.584427	970.249	1002.2	737.509	819.865	986.224	778.687
FBgn0037643	ScsbetaA	623.214	0.333028	0.263494	1.26389	0.206268	0.584427	412.816	455.977	608.756	489.964	434.396	549.36
FBgn0026575	hang	210.698	0.462863	0.366616	1.26253	0.206758	0.584878	191.946	142.493	181.836	273.085	167.219	227.46
FBgn0032638	SPH93	271.33	0.701386	0.555384	1.26289	0.20663	0.584878	223.499	148.43	463.061	140.513	185.964	301.787
FBgn0039160	CG5510	96.2117	-0.473443	0.37537	-1.26127	0.207212	0.585691	120.952	116.369	79.0592	91.0283	118.661	85.0437
FBgn0037842	CG6567	89.7037	-0.422234	0.335091	-1.26006	0.207649	0.58599	86.7702	131.806	94.871	73.3113	109.288	84.0912
FBgn0259734	Nost	63.5563	-0.69206	0.549115	-1.26032	0.207555	0.58599	76.2526	90.2454	41.7884	61.0928	83.249	51.4406
FBgn0000261	Cat	200.943	0.361817	0.287284	1.25944	0.207872	0.586151	199.834	181.678	236.048	251.702	190.756	243.875
FBgn0031357	mRpL48	120.777	-0.745742	0.592696	-1.25822	0.208312	0.586457	157.764	143.68	121.977	58.6491	150.722	90.3131
FBgn0085433	CG34404	71.1294	0.589915	0.468834	1.25826	0.208298	0.586457	42.0704	86.6831	91.4828	108.134	64.3767	99.8085
FBgn0030360	CG1806	207.883	-0.619587	0.492686	-1.25757	0.208547	0.586652	157.764	235.113	132.142	125.24	196.439	128.691
FBgn0038349	AOX3	64.8101	-0.695284	0.553246	-1.25673	0.20885	0.587038	63.1056	60.5594	38.4002	37.8775	61.8325	38.1389
FBgn0035872	Cpsf6	154.956	-0.464717	0.369921	-1.25626	0.209022	0.587054	228.758	187.615	134.401	164.951	208.187	149.676
FBgn0011584	Trp1	198.8	-0.30768	0.245308	-1.25426	0.209748	0.58816	297.122	195.927	190.871	199.162	246.525	195.017
FBgn0036734	CG7564	99.4038	-0.453089	0.361142	-1.2546	0.209623	0.58816	186.687	144.868	107.295	131.96	165.778	119.628
FBgn0039189	CG18528	99.0604	0.372532	0.29713	1.25377	0.209926	0.588192	78.882	72.4338	105.036	90.4173	75.6579	97.7266
FBgn0038666	Smu1	71.4425	-0.503958	0.402634	-1.25165	0.210696	0.589415	89.3996	60.5594	33.8825	67.2021	74.9795	50.5423
FBgn0263102	psq	178.755	-0.416576	0.332786	-1.25179	0.210648	0.589415	220.87	198.302	129.883	181.446	209.586	155.664
FBgn0031048	CG12237	112.241	0.485465	0.388023	1.25112	0.210889	0.58949	57.8468	112.807	146.824	101.414	85.3268	124.119
FBgn0036688	Fit2	90.222	-0.645836	0.516395	-1.25066	0.211058	0.589494	120.952	142.493	75.6709	92.861	131.723	84.266
FBgn0031374	Wdr62	238.407	-0.365407	0.292295	-1.25013	0.211252	0.58957	286.605	298.047	199.907	252.924	292.326	226.415
FBgn0000426	SmF	134.191	0.545328	0.439778	1.24001	0.214973	0.590618	52.588	130.618	195.389	83.0862	91.6032	139.238
FBgn0000640	Fbp2	1610.6	0.670912	0.539966	1.24251	0.214049	0.590618	1401.47	1658.85	4012.82	863.241	1530.16	2438.03
FBgn0001098	Gdh	432.559	-0.32907	0.264803	-1.2427	0.213979	0.590618	431.222	562.846	363.672	430.704	497.034	397.188
FBgn0001105	Gbeta13F	2155.35	-0.358869	0.288526	-1.2438	0.213573	0.590618	2206.07	2402.19	1738.17	1856	2304.13	1797.09
FBgn0003169	put	111.76	0.537309	0.431916	1.24401	0.213494	0.590618	57.8468	122.306	114.071	153.954	90.0765	134.012
FBgn0013756	Mtor	87.1055	-0.526036	0.422746	-1.24433	0.213378	0.590618	134.099	103.307	64.3768	97.7485	118.703	81.0626
FBgn0024985	Rilpl	65.4259	-0.658713	0.529551	-1.24391	0.213533	0.590618	78.882	56.9971	39.5296	45.2087	67.9396	42.3691
FBgn0030292	CG11752	226.78	-0.432405	0.347576	-1.24406	0.213478	0.590618	207.723	238.675	207.813	126.462	223.199	167.137
FBgn0030318	rho-4	73.9881	0.551085	0.444469	1.23987	0.215022	0.590618	60.4762	60.5594	63.2474	112.411	60.5178	87.829
FBgn0032059	PrBP	90.5719	0.592872	0.477959	1.24043	0.214818	0.590618	68.3644	81.9333	162.636	67.813	75.1489	115.225
FBgn0033691	CG8860	98.0743	0.477465	0.384852	1.24065	0.214736	0.590618	97.2878	70.0589	123.106	106.301	83.6734	114.704
FBgn0034091	mrj	96.1198	0.576131	0.462874	1.24468	0.213248	0.590618	84.1408	73.6212	109.553	124.018	78.881	116.786
FBgn0034248	CG14483	112.904	0.6212	0.497808	1.24787	0.212078	0.590618	68.3644	61.7468	140.048	61.0928	65.0556	100.57
FBgn0036316	CG10960	106.435	0.43726	0.352422	1.24073	0.214706	0.590618	70.9938	92.6203	109.553	115.465	81.807	112.509
FBgn0039297	CG11852	257.517	0.737473	0.590702	1.24847	0.21186	0.590618	362.857	224.426	365.931	609.095	293.642	487.513
FBgn0039381	SppL	120.18	0.355569	0.286524	1.24097	0.214615	0.590618	113.064	130.618	142.307	171.06	121.841	156.683
FBgn0039508	CG3368	96.8921	-0.564484	0.454799	-1.24117	0.214542	0.590618	99.9172	157.929	98.2593	78.8097	128.923	88.5345
FBgn0039733	CG11504	118.152	-0.69036	0.55627	-1.24105	0.214586	0.590618	223.499	132.993	110.683	108.745	178.246	109.714
FBgn0085436	Not1	456.882	-0.384886	0.3105	-1.23957	0.215135	0.590618	507.474	455.977	335.437	400.158	481.726	367.797
FBgn0259214	PMCA	927.109	-0.350573	0.281113	-1.24709	0.212365	0.590618	715.197	920.265	763.486	525.398	817.731	644.442
FBgn0263852	Dad1	105.586	0.510725	0.409739	1.24647	0.212593	0.590618	68.3644	83.1208	132.142	87.3627	75.7426	109.752
FBgn0034876	wmd	165.645	0.483908	0.391289	1.2367	0.216197	0.59232	115.694	170.991	241.695	165.561	143.342	203.628
FBgn0085813	18SrRNA-Psi:CR41602	99.897	-0.720484	0.58266	-1.23654	0.216257	0.59232	223.499	136.556	135.53	82.4753	180.027	109.003
FBgn0264922	smt3	2026.89	0.30781	0.248826	1.23705	0.216069	0.59232	2019.38	2054.27	3055.07	1991.62	2036.82	2523.35
FBgn0038432	CG14883	134.11	-0.505828	0.409679	-1.23469	0.216944	0.593283	126.211	138.93	97.1299	90.4173	132.571	93.7736
FBgn0040397	CG3655	218.96	-0.459587	0.372162	-1.23491	0.216863	0.593283	247.164	341.983	188.613	241.317	294.573	214.965
FBgn0016697	Prosalpha5	724.355	0.31225	0.253014	1.23412	0.217158	0.593408	596.874	729.088	1030.03	626.201	662.981	828.115
FBgn0001104	Galphai	77.8044	0.697538	0.566207	1.23195	0.217968	0.593644	84.1408	48.685	60.9885	149.066	66.4129	105.027
FBgn0017429	CG5989	207.273	-0.444757	0.361122	-1.2316	0.218099	0.593644	220.87	191.178	187.483	116.076	206.024	151.78
FBgn0030329	prtp	123.405	0.443079	0.359807	1.23144	0.21816	0.593644	70.9938	110.432	100.518	150.288	90.7128	125.403
FBgn0031245	CG3625	274.553	0.366357	0.297671	1.23074	0.218419	0.593644	202.464	346.732	408.849	311.573	274.598	360.211
FBgn0036282	Smyd4-2	152.073	-0.772836	0.62791	-1.23081	0.218395	0.593644	118.323	132.993	73.4121	73.9223	125.658	73.6672
FBgn0053519	Unc-89	97.383	-0.737577	0.598724	-1.23191	0.217981	0.593644	73.6232	98.5575	68.8944	36.0447	86.0903	52.4696
FBgn0087002	apolpp	3193.96	0.483003	0.392371	1.23098	0.218329	0.593644	2984.37	3010.16	4961.53	3418.14	2997.26	4189.84
FBgn0024945	NitFhit	64.6176	-0.452559	0.367964	-1.2299	0.218734	0.594042	73.6232	92.6203	67.765	56.2054	83.1217	61.9852
FBgn0034727	mRpS29	249.205	-0.472591	0.384608	-1.22876	0.219162	0.594678	360.228	294.485	286.872	185.111	327.356	235.992
FBgn0051038	CG31038	317.674	-0.462149	0.376227	-1.22838	0.219304	0.594678	86.7702	98.5575	62.1179	72.7004	92.6638	67.4092
FBgn0025608	Faf2	69.4081	-0.497334	0.40525	-1.22723	0.219738	0.59494	118.323	67.684	51.9532	75.1441	93.0035	63.5487
FBgn0035206	sturkopf	111.017	0.482276	0.392942	1.22735	0.219692	0.59494	78.882	81.9333	106.165	118.52	80.4077	112.343
FBgn0083970	CG34134	78.7333	-0.571696	0.466334	-1.22594	0.220222	0.595796	60.4762	64.1217	35.0119	48.2633	62.299	41.6376
FBgn0033010	Atf6	101.42	0.490056	0.40046	1.22373	0.221054	0.597227	78.882	83.1208	115.201	113.022	81.0014	114.111
FBgn0263930	dally	188.358	0.582148	0.475752	1.22364	0.221089	0.597227	84.1408	110.432	70.0239	221.156	97.2863	145.59
FBgn0053548	SmydA-8	95.2164	-0.619713	0.506987	-1.22234	0.221578	0.598091	13.147	42.7478	24.8472	15.8841	27.9474	20.3656
FBgn0001216	Hsc70-1	103.338	-0.922423	0.755792	-1.22047	0.222286	0.598193	84.1408	77.1836	53.0826	32.3792	80.6622	42.7309
FBgn0030087	CG7766	311.77	-0.606418	0.496878	-1.22046	0.222292	0.598193	323.416	290.923	190.871	211.992	307.169	201.432
FBgn0031161	CG15445	70.1297	0.421799	0.345386	1.22124	0.221995	0.598193	63.1056	45.1227	70.0239	70.2567	54.1142	70.1403
FBgn0266411	sima	207.638	-0.377096	0.308741	-1.2214	0.221935	0.598193	228.758	254.112	162.636	208.937	241.435	185.787
FBgn0038294	Mf	192.138	-0.449613	0.369163	-1.21792	0.223253	0.598198	107.805	89.058	67.765	74.5332	98.4317	71.1491
FBgn0002772	Mlc1	2544.44	-0.688396	0.565265	-1.21783	0.223289	0.598198	1837.95	2146.89	1764.15	710.509	1992.42	1237.33
FBgn0010611	Hmgs	204.64	-0.427048	0.350935	-1.21689	0.223647	0.598198	186.687	195.927	156.989	128.906	191.307	142.947
FBgn0023477	Taldo	239.713	0.354669	0.291234	1.21782	0.223293	0.598198	255.052	157.929	269.931	248.648	206.491	259.289
FBgn0035906	GstO2	133.575	0.324622	0.266134	1.21977	0.222554	0.598198	155.135	118.744	186.354	152.121	136.939	169.237
FBgn0037396	CG11459	119.507	0.632373	0.520045	1.216	0.223986	0.598198	78.882	131.806	214.589	117.298	105.344	165.944
FBgn0037973	CG18547	121.785	0.525115	0.431383	1.21728	0.223497	0.598198	63.1056	131.806	180.707	108.745	97.4557	144.726
FBgn0038326	CG5044	80.6089	-0.488649	0.401333	-1.21756	0.22339	0.598198	86.7702	64.1217	58.7297	47.6524	75.446	53.191
FBgn0038420	CG10311	264.7	0.530639	0.43615	1.21664	0.22374	0.598198	76.2526	80.7459	156.989	72.7004	78.4992	114.845
FBgn0086674	Tpst	93.0661	-0.469085	0.385627	-1.21642	0.223825	0.598198	97.2878	108.057	71.1533	77.5878	102.672	74.3706
FBgn0036099	CG11811	145.527	0.567363	0.467142	1.21454	0.224541	0.599227	105.176	116.369	207.813	122.797	110.773	165.305
FBgn0050349	CG30349	118.158	-0.43336	0.357403	-1.21253	0.225311	0.600829	94.6584	136.556	98.2593	76.9769	115.607	87.6181
FBgn0033989	CG7639	115.22	-0.522249	0.431437	-1.21049	0.226092	0.602458	73.6232	71.2464	48.5649	51.9289	72.4348	50.2469
FBgn0069923	CG41128	153.958	0.617194	0.510486	1.20903	0.22665	0.60349	86.7702	96.1826	213.46	70.2567	91.4764	141.858
FBgn0004908	Arl2	74.2749	0.521479	0.431809	1.20766	0.227178	0.60444	63.1056	70.0589	123.106	70.8676	66.5823	96.987
FBgn0263846	CG43707	182.156	-0.763287	0.632298	-1.20716	0.227369	0.604494	18.4058	17.8116	10.1648	10.9967	18.1087	10.5807
FBgn0010389	htl	119.861	-0.616154	0.510886	-1.20605	0.227798	0.604958	102.547	130.618	73.4121	79.4206	116.582	76.4164
FBgn0034468	Obp56a	1187.5	0.978319	0.811329	1.20582	0.227886	0.604958	1106.98	575.908	1292.05	2020.34	841.443	1656.2
FBgn0027930	MP1	95.5748	0.493848	0.410556	1.20288	0.229024	0.605867	70.9938	112.807	142.307	122.186	91.9003	132.246
FBgn0029868	ND-B16.6	683.108	-0.347074	0.288496	-1.20304	0.228959	0.605867	502.216	585.408	518.402	341.509	543.812	429.956
FBgn0030955	CG6891	761.724	0.359293	0.298485	1.20372	0.228697	0.605867	520.621	668.528	877.557	654.915	594.575	766.236
FBgn0037150	CG7133	71.8499	0.483256	0.401467	1.20373	0.228695	0.605867	55.2174	54.6222	106.165	50.0961	54.9198	78.1306
FBgn0037834	Art1	173.497	0.358001	0.297711	1.20251	0.229166	0.605867	118.323	178.116	207.813	180.835	148.219	194.324
FBgn0039726	eIF2Balpha	67.2999	-0.480208	0.399416	-1.20228	0.229256	0.605867	84.1408	55.8096	47.4355	50.0961	69.9752	48.7658
FBgn0031264	CG11835	6665.8	-0.539089	0.449273	-1.19992	0.230172	0.606926	8343.09	8633.87	6717.77	4966.84	8488.48	5842.31
FBgn0039561	mfrn	155.216	-0.462663	0.385431	-1.20038	0.229993	0.606926	136.729	146.055	97.1299	108.134	141.392	102.632
FBgn0085453	Mthfs	103.846	0.519588	0.432985	1.20001	0.230134	0.606926	99.9172	102.12	199.907	92.2501	101.019	146.078
FBgn0001208	Hn	73.8009	0.650515	0.542607	1.19887	0.230579	0.607093	97.2878	48.685	150.212	75.1441	72.9864	112.678
FBgn0086384	Mer	75.5857	-0.566995	0.47279	-1.19925	0.23043	0.607093	120.952	71.2464	63.2474	64.1474	96.0994	63.6974
FBgn0000568	Eip75B	1553.96	-0.388585	0.324539	-1.19735	0.231172	0.607817	1201.64	1081.76	780.427	961.6	1141.7	871.014
FBgn0037756	CG8507	103.406	0.415138	0.346818	1.19699	0.23131	0.607817	57.8468	87.8705	110.683	90.4173	72.8587	100.55
FBgn0086357	Sec61alpha	288.018	0.312654	0.261233	1.19684	0.231369	0.607817	265.569	235.113	240.566	374.499	250.341	307.532
FBgn0036761	MED19	102.436	-0.416982	0.348858	-1.19528	0.231979	0.608516	128.841	123.494	79.0592	108.134	126.167	93.5967
FBgn0261439	SdhA	555.042	-0.444921	0.372192	-1.19541	0.231928	0.608516	328.675	379.981	304.943	218.101	354.328	261.522
FBgn0002413	dco	324.535	0.318023	0.266351	1.194	0.232477	0.60884	197.205	263.612	274.448	306.075	230.408	290.262
FBgn0010113	hdc	1295.33	-0.400072	0.335533	-1.19235	0.233125	0.60884	1272.63	1449.86	908.051	1155.26	1361.25	1031.66
FBgn0022097	Vha36-1	111.722	0.538628	0.451395	1.19325	0.232771	0.60884	113.064	60.5594	126.495	119.742	86.8118	123.118
FBgn0032393	Nfs1	196.629	-0.375917	0.315282	-1.19232	0.233136	0.60884	202.464	203.052	178.448	135.626	202.758	157.037
FBgn0032656	CG5674	66.9654	0.645714	0.541345	1.1928	0.232949	0.60884	15.7764	58.1845	48.5649	73.9223	36.9805	61.2436
FBgn0039637	Ctl2	124.523	0.501293	0.420265	1.1928	0.232947	0.60884	68.3644	105.682	85.8357	163.118	87.0233	124.477
FBgn0038723	CG6195	159.14	-0.362676	0.304391	-1.19148	0.233465	0.609249	194.576	168.616	150.212	131.349	181.596	140.781
FBgn0001308	Khc	143.154	-0.341623	0.287554	-1.18803	0.234821	0.609474	218.24	130.618	140.048	128.906	174.429	134.477
FBgn0011204	cue	63.9044	-0.683863	0.575973	-1.18732	0.235103	0.609474	31.5528	47.4976	35.0119	16.4951	39.5252	25.7535
FBgn0015299	Ssb-c31a	87.7829	0.515312	0.433359	1.18911	0.234396	0.609474	105.176	108.057	219.107	88.5845	106.617	153.846
FBgn0025725	alphaCOP	76.8091	-0.599565	0.504614	-1.18817	0.234768	0.609474	134.099	71.2464	41.7884	89.8064	102.673	65.7974
FBgn0033879	Echs1	432.1	-0.313911	0.263927	-1.18938	0.234288	0.609474	496.957	417.979	420.143	315.239	457.468	367.691
FBgn0034362	CG5323	292.316	0.534479	0.450143	1.18735	0.235088	0.609474	115.694	199.49	311.719	152.121	157.592	231.92
FBgn0035844	CG13676	112.781	0.942185	0.792058	1.18954	0.234227	0.609474	89.3996	113.994	63.2474	327.457	101.697	195.352
FBgn0035944	CG5021	81.1682	-0.39836	0.335475	-1.18745	0.23505	0.609474	97.2878	94.9951	72.2827	73.3113	96.1415	72.797
FBgn0263006	SERCA	1064.71	-0.422591	0.354932	-1.19063	0.233801	0.609474	936.067	1129.25	782.686	759.994	1032.66	771.34
FBgn0003274	RpLP2	9025.21	0.400869	0.337877	1.18644	0.23545	0.609927	6812.78	7010.64	12414.6	5840.47	6911.71	9127.51
FBgn0016126	CaMKI	141.083	0.599765	0.50624	1.18474	0.236119	0.610766	136.729	87.8705	170.542	166.172	112.3	168.357
FBgn0030854	CG8289	199.089	0.35861	0.302646	1.18492	0.23605	0.610766	184.058	207.802	181.836	319.515	195.93	250.676
FBgn0027498	CG2061	76.3749	-0.59175	0.499978	-1.18355	0.23659	0.611537	68.3644	79.5584	48.5649	50.0961	73.9614	49.3305
FBgn0264691	Lst8	122.338	0.568957	0.481119	1.18257	0.236979	0.612094	92.029	75.9961	140.048	108.134	84.0126	124.091
FBgn0020618	Rack1	5937.55	-0.258229	0.218451	-1.18209	0.237169	0.612138	5995.03	6027.44	5369.25	4684.6	6011.24	5026.92
FBgn0028396	TotA	244.546	0.724532	0.613463	1.18105	0.237582	0.612311	289.234	182.866	606.497	172.282	236.05	389.389
FBgn0031913	CG5958	190.68	0.512582	0.433993	1.18108	0.23757	0.612311	149.876	169.804	289.131	169.838	159.84	229.484
FBgn0036377	CG10710	68.7935	-0.877657	0.743556	-1.18035	0.237861	0.612583	86.7702	104.495	53.0826	51.3179	95.6324	52.2003
FBgn0004648	svr	152.345	0.442857	0.375681	1.17881	0.238474	0.613714	68.3644	131.806	151.342	129.517	100.085	140.429
FBgn0029092	ced-6	73.0438	0.591001	0.501966	1.17737	0.239047	0.614334	65.735	60.5594	94.871	94.6938	63.1472	94.7824
FBgn0032488	CG16812	120.222	-0.446106	0.378945	-1.17723	0.239103	0.614334	136.729	185.241	100.518	136.848	160.985	118.683
FBgn0035153	ebd1	115.726	-0.436821	0.371292	-1.17649	0.2394	0.614334	157.764	141.305	114.071	106.301	149.535	110.186
FBgn0036811	MED11	70.903	0.49546	0.421143	1.17646	0.239409	0.614334	57.8468	80.7459	120.848	79.4206	69.2963	100.134
FBgn0035469	CG14977	127.68	0.417008	0.354807	1.17531	0.239871	0.615057	152.505	98.5575	221.366	110.578	125.531	165.972
FBgn0266711	EloC	356.484	0.378663	0.322297	1.17489	0.240039	0.615057	297.122	311.109	503.72	290.802	304.116	397.261
FBgn0032987	RpL21	6493.95	0.353462	0.300994	1.17431	0.240269	0.615201	5014.27	5722.27	8944.98	4778.68	5368.27	6861.83
FBgn0010352	Nc73EF	216.808	0.437786	0.373854	1.17101	0.241596	0.617978	84.1408	127.056	152.471	139.292	105.598	145.881
FBgn0027053	CSN5	332.951	-0.235102	0.200873	-1.1704	0.241839	0.617978	410.187	344.357	360.284	279.194	377.272	319.739
FBgn0034240	MESR4	84.4106	-0.464902	0.397249	-1.1703	0.241878	0.617978	94.6584	109.244	76.8004	72.0895	101.951	74.4449
FBgn0033055	Tbce	83.5875	-0.466353	0.399044	-1.16867	0.242535	0.619209	134.099	73.6212	67.765	78.1988	103.86	72.9819
FBgn0020620	RN-tre	110.259	0.35161	0.301128	1.16764	0.24295	0.61936	78.882	97.37	97.1299	129.517	88.126	113.323
FBgn0021872	Xbp1	400.841	0.245977	0.210737	1.16722	0.24312	0.61936	386.522	356.232	409.978	466.138	371.377	438.058
FBgn0035107	mri	93.7166	0.480632	0.411641	1.1676	0.242969	0.61936	97.2878	75.9961	118.589	120.353	86.642	119.471
FBgn0261545	CG42663	110.862	-0.388921	0.333337	-1.16675	0.243311	0.619402	136.729	154.367	101.648	120.964	145.548	111.306
FBgn0000017	Abl	347.02	-0.290463	0.249536	-1.16402	0.244418	0.619987	420.704	358.607	292.519	340.287	389.655	316.403
FBgn0026577	CG8677	105.761	-0.767622	0.659348	-1.16421	0.244337	0.619987	189.317	198.302	77.9298	149.066	193.81	113.498
FBgn0036258	eIF3l	571.942	-0.244136	0.209574	-1.16492	0.244053	0.619987	552.174	635.28	536.473	471.636	593.727	504.055
FBgn0050015	CG30015	297.702	-0.422885	0.363143	-1.16452	0.244215	0.619987	336.563	420.354	238.307	326.846	378.458	282.577
FBgn0058002	ND-AGGG	86.9189	0.513111	0.440428	1.16503	0.244007	0.619987	70.9938	36.8106	106.165	43.9868	53.9022	75.076
FBgn0260008	UQCR-11	635.864	0.440924	0.379032	1.16329	0.244713	0.62029	326.046	435.79	735.25	306.075	380.918	520.663
FBgn0037342	CG2931	93.1024	0.439948	0.378356	1.16279	0.244915	0.620358	57.8468	74.8087	84.7063	97.7485	66.3277	91.2274
FBgn0015229	glec	1372.17	0.256957	0.221641	1.15934	0.246318	0.623466	1538.2	1348.93	1566.5	1876.77	1443.57	1721.64
FBgn0033751	CG8818	171.45	-0.413864	0.357123	-1.15888	0.246504	0.623489	189.317	198.302	156.989	135.015	193.81	146.002
FBgn0027596	Kank	152.377	-0.55637	0.480613	-1.15762	0.247018	0.624342	97.2878	104.495	42.9178	92.861	100.891	67.8894
FBgn0037657	hyx	122.247	-0.476378	0.412231	-1.15561	0.247841	0.625976	160.393	143.68	125.365	93.472	152.037	109.419
FBgn0010019	Cyp4g1	101.772	1.66544	1.44188	1.15505	0.248071	0.62611	44.6998	71.2464	152.471	216.268	57.9731	184.37
FBgn0011708	Syx5	68.0655	0.55448	0.480391	1.15423	0.248407	0.62651	47.3292	80.7459	96.0004	96.5266	64.0375	96.2635
FBgn0053144	CG33144	65.8081	0.516631	0.448093	1.15295	0.248929	0.627078	44.6998	55.8096	59.8591	84.919	50.2547	72.389
FBgn0083167	Neb-cGP	527.179	0.540447	0.468807	1.15281	0.248987	0.627078	241.905	275.486	561.32	194.886	258.695	378.103
FBgn0030362	regucalcin	860.091	0.410462	0.35652	1.1513	0.249609	0.628198	896.626	932.14	1480.67	952.437	914.383	1216.55
FBgn0032720	mRpL13	165.37	-0.452161	0.39352	-1.14902	0.25055	0.630116	81.5114	112.807	80.1886	64.7584	97.1591	72.4735
FBgn0037933	Ho	276.973	0.334089	0.291256	1.14706	0.251355	0.631243	194.576	230.363	299.296	241.317	212.469	270.306
FBgn0267384	Ubc7	103.593	0.37091	0.323313	1.14721	0.251293	0.631243	81.5114	103.307	136.659	107.523	92.4093	122.091
FBgn0031708	CG7382	134.522	-0.453142	0.39582	-1.14482	0.252285	0.63313	136.729	93.8077	114.071	54.3726	115.268	84.2219
FBgn0020647	KrT95D	213.591	-0.32658	0.285763	-1.14283	0.253108	0.634745	249.793	167.429	143.436	182.057	208.611	162.746
FBgn0051342	CG31342	68.4171	0.66634	0.583386	1.14219	0.253373	0.634959	49.9586	49.8725	45.1767	111.8	49.9155	78.4882
FBgn0000463	Dl	154.705	0.537851	0.472736	1.13774	0.255229	0.637035	131.47	140.118	118.589	274.307	135.794	196.448
FBgn0015218	eIF4E1	1295.39	0.24269	0.212964	1.13958	0.254461	0.637035	1085.94	1131.63	1451.3	1176.65	1108.79	1313.97
FBgn0030512	Nadsyn	131.501	-0.368587	0.324124	-1.13718	0.255463	0.637035	157.764	118.744	106.165	105.08	138.254	105.622
FBgn0031228	ND-15	466.035	0.443787	0.389933	1.13811	0.255074	0.637035	265.569	319.421	528.567	271.863	292.495	400.215
FBgn0033092	CG9422	96.2201	-0.518426	0.455786	-1.13743	0.255357	0.637035	105.176	110.432	88.0945	63.5365	107.804	75.8155
FBgn0033725	Cpr49Ac	239.996	0.699721	0.615254	1.13729	0.255418	0.637035	223.499	257.674	643.768	140.513	240.587	392.141
FBgn0040271	Sulf1	187.256	0.593953	0.521642	1.13862	0.254862	0.637035	47.3292	36.8106	29.3648	93.472	42.0699	61.4184
FBgn0025352	Mtpbeta	510.05	-0.311253	0.274237	-1.13498	0.256385	0.637512	686.274	590.157	564.709	463.083	638.215	513.896
FBgn0039031	Gbp3	93.191	0.710451	0.626185	1.13457	0.256555	0.637512	70.9938	104.495	228.142	62.9256	87.7442	145.534
FBgn0039904	Hcf	118.404	-0.385498	0.339279	-1.13623	0.255861	0.637512	102.547	148.43	80.1886	113.633	125.488	96.9106
FBgn0052649	Coq8	94.3968	0.748854	0.659885	1.13483	0.256448	0.637512	13.147	49.8725	49.6943	61.7037	31.5097	55.699
FBgn0265003	koi	467.825	-0.371664	0.327345	-1.13539	0.256213	0.637512	336.563	429.853	330.919	265.143	383.208	298.031
FBgn0034938	CG3803	92.1887	-0.375656	0.331399	-1.13355	0.256985	0.638131	107.805	78.371	77.9298	63.5365	93.0882	70.7331
FBgn0033225	TTLL12	127.132	-0.329128	0.290549	-1.13278	0.257307	0.638482	168.282	130.618	96.0004	136.237	149.45	116.119
FBgn0025800	Smox	541.927	0.321081	0.283783	1.13143	0.257874	0.639046	383.893	507.037	565.838	553.501	445.465	559.669
FBgn0036557	mRpS31	89.3206	0.652909	0.577091	1.13138	0.257896	0.639046	34.1822	60.5594	91.4828	61.7037	47.3708	76.5932
FBgn0027568	Cand1	100.295	-0.348069	0.307879	-1.13054	0.25825	0.639476	126.211	108.057	68.8944	110.578	117.134	89.7362
FBgn0052190	NUCB1	183.33	0.401328	0.355222	1.1298	0.258563	0.639802	120.952	155.555	224.754	146.012	138.253	185.383
FBgn0038133	Osi22	112.327	-2.25648	1.99808	-1.12932	0.258761	0.639846	13.147	9.49951	2.25883	2.44371	11.3233	2.35127
FBgn0038585	Non3	107.944	-0.523087	0.463754	-1.12794	0.259345	0.640462	92.029	146.055	101.648	67.2021	119.042	84.4248
FBgn0040239	bc10	70.059	0.550067	0.487702	1.12788	0.259372	0.640462	36.8116	48.685	71.1533	56.8163	42.7483	63.9848
FBgn0262114	RanBPM	129.293	0.496534	0.441498	1.12466	0.260734	0.643375	78.882	113.994	114.071	160.674	96.4381	137.373
FBgn0262716	Arp3	188.148	0.312054	0.277664	1.12386	0.261074	0.643764	160.393	189.99	213.46	224.821	175.192	219.141
FBgn0003410	sina	188.55	0.320861	0.286481	1.12001	0.26271	0.643997	136.729	191.178	169.413	244.371	163.953	206.892
FBgn0024996	eIF2Bbeta	113.759	-0.382943	0.341955	-1.11986	0.262772	0.643997	186.687	129.431	145.695	95.3048	158.059	120.5
FBgn0028968	gammaCOP	123.856	-0.413188	0.368437	-1.12146	0.262091	0.643997	223.499	112.807	93.7416	151.51	168.153	122.626
FBgn0029997	CG2258	106.814	0.359551	0.32114	1.11961	0.26288	0.643997	73.6232	74.8087	83.5769	105.691	74.216	94.6337
FBgn0032724	CG10428	173.492	0.319354	0.285038	1.12039	0.262548	0.643997	155.135	192.365	238.307	200.995	173.75	219.651
FBgn0032725	Nedd8	138.777	0.3844	0.342283	1.12305	0.261418	0.643997	118.323	123.494	201.036	117.909	120.908	159.473
FBgn0085407	Pvf3	118.541	0.651523	0.582053	1.11935	0.26299	0.643997	65.735	100.932	116.33	147.845	83.3337	132.087
FBgn0260960	Baldspot	106.611	0.380749	0.340103	1.11951	0.262922	0.643997	68.3644	83.1208	103.906	96.5266	75.7426	100.216
FBgn0261553	CG42671	174.973	-0.608068	0.542236	-1.12141	0.262114	0.643997	218.24	281.423	205.554	124.018	249.832	164.786
FBgn0267849	Syx7	97.3735	0.467774	0.417211	1.12119	0.262206	0.643997	70.9938	93.8077	100.518	129.517	82.4008	115.017
FBgn0014037	Su(Tpl)	276.891	-0.447363	0.400241	-1.11773	0.263681	0.644646	291.863	314.671	169.413	274.307	303.267	221.86
FBgn0024236	foi	79.2538	0.391962	0.350781	1.1174	0.263824	0.644646	73.6232	56.9971	74.5415	92.2501	65.3102	83.3958
FBgn0030400	Pits	332.768	-0.452947	0.405271	-1.11764	0.263721	0.644646	423.334	387.105	297.037	294.467	405.219	295.752
FBgn0031637	mxt	306.54	-0.390827	0.350016	-1.1166	0.264166	0.644646	289.234	325.358	273.319	197.941	307.296	235.63
FBgn0041094	scyl	1548.12	0.383437	0.343367	1.1167	0.264124	0.644646	1390.95	1293.12	1297.7	2199.95	1342.04	1748.83
FBgn0086912	mbm	76.9302	-0.67655	0.60671	-1.11511	0.264802	0.645752	113.064	49.8725	48.5649	51.3179	81.4683	49.9414
FBgn0015521	RpS21	3147.57	0.376342	0.337698	1.11443	0.265094	0.646017	2592.59	2601.68	4604.63	2141.3	2597.13	3372.97
FBgn0030007	alpha-PheRS	141.956	-0.348267	0.312933	-1.11291	0.265745	0.64716	197.205	130.618	94.871	155.176	163.912	125.023
FBgn0028554	x16	137.176	0.311886	0.280798	1.11071	0.266692	0.649017	120.952	113.994	149.083	141.735	117.473	145.409
FBgn0050026	CG30026	120.878	0.571315	0.514745	1.1099	0.267042	0.649423	110.435	98.5575	196.519	114.244	104.496	155.381
FBgn0051151	wge	115.063	-0.380173	0.342867	-1.1088	0.267515	0.650125	184.058	113.994	91.4828	131.349	149.026	111.416
FBgn0034259	P32	578.032	-0.413966	0.373782	-1.10751	0.268074	0.651038	520.621	345.545	397.555	251.091	433.083	324.323
FBgn0038808	Srp14	101.7	0.434612	0.393464	1.10458	0.269342	0.653401	42.0704	73.6212	75.6709	86.1408	57.8458	80.9059
FBgn0039120	Nup98-96	90.6549	-0.378941	0.343117	-1.10441	0.269417	0.653401	118.323	116.369	96.0004	84.919	117.346	90.4597
FBgn0001994	crp	459.638	-0.373334	0.338629	-1.10248	0.270251	0.654526	412.816	586.595	338.825	434.981	499.705	386.903
FBgn0010198	RpS15Aa	4345.53	0.300731	0.272695	1.10281	0.270109	0.654526	3725.86	3814.06	6058.19	3234.25	3769.96	4646.22
FBgn0030749	AnxB11	230.732	0.444246	0.403307	1.10151	0.270675	0.655055	152.505	201.865	247.342	238.262	177.185	242.802
FBgn0037465	CG1105	111.819	-0.318851	0.289791	-1.10028	0.27121	0.655055	81.5114	93.8077	67.765	73.9223	87.6596	70.8436
FBgn0039305	CG11858	105.817	0.540778	0.491286	1.10074	0.27101	0.655055	42.0704	75.9961	103.906	73.3113	59.0333	88.6089
FBgn0262732	mbf1	313.399	-0.381923	0.347011	-1.10061	0.271068	0.655055	412.816	351.482	266.542	317.683	382.149	292.112
FBgn0026533	Dek	281.956	0.286034	0.260344	1.09868	0.271909	0.655699	291.863	257.674	285.743	378.775	274.769	332.259
FBgn0033972	Ciao1	96.9704	0.399996	0.364165	1.09839	0.272033	0.655699	76.2526	68.8715	88.0945	101.414	72.5621	94.7543
FBgn0053100	eIF4EHP	233.876	0.401778	0.365579	1.09902	0.271761	0.655699	149.876	118.744	146.824	203.439	134.31	175.132
FBgn0051390	MED7	80.2495	0.356991	0.325435	1.09696	0.272657	0.656754	60.4762	61.7468	85.8357	72.0895	61.1115	78.9626
FBgn0000289	cg	403.644	-0.307791	0.28084	-1.09597	0.273094	0.656974	486.439	535.535	327.531	496.684	510.987	412.108
FBgn0032213	CG5390	163.711	0.569839	0.519971	1.09591	0.27312	0.656974	160.393	162.679	201.036	277.972	161.536	239.504
FBgn0038530	AttD	80.5623	0.805212	0.736397	1.09345	0.274197	0.659116	57.8468	92.6203	197.648	68.4239	75.2335	133.036
FBgn0002044	swm	279.016	-0.396694	0.363669	-1.09081	0.275356	0.659389	294.493	371.669	283.484	225.432	333.081	254.458
FBgn0010406	RNaseX25	95.3889	-0.424843	0.389534	-1.09064	0.275429	0.659389	131.47	81.9333	70.0239	84.919	106.702	77.4714
FBgn0034158	CG5522	148.357	-0.347787	0.318497	-1.09196	0.274849	0.659389	107.805	147.242	98.2593	105.08	127.524	101.669
FBgn0037235	CG1103	332.39	0.237087	0.217367	1.09072	0.275395	0.659389	302.381	324.171	381.743	359.837	313.276	370.79
FBgn0051224	CG31224	139.706	0.333937	0.305791	1.09204	0.274815	0.659389	152.505	111.619	142.307	183.278	132.062	162.792
FBgn0053506	CG33506	94.0571	0.560393	0.51357	1.09117	0.275197	0.659389	47.3292	78.371	117.459	72.7004	62.8501	95.0799
FBgn0031150	bves	102.032	-0.462689	0.424419	-1.09017	0.275638	0.659441	120.952	83.1208	63.2474	81.8643	102.037	72.5558
FBgn0029079	icln	102.191	0.453776	0.41789	1.08587	0.277534	0.661472	105.176	73.6212	135.53	106.301	89.3986	120.916
FBgn0034570	CG10543	117.399	-0.378757	0.348858	-1.08571	0.277609	0.661472	120.952	147.242	91.4828	115.465	134.097	103.474
FBgn0037027	HIPP1	115.82	-0.357184	0.328681	-1.08672	0.277161	0.661472	136.729	144.868	86.9651	131.349	140.798	109.157
FBgn0037489	CG1234	64.5985	-0.484384	0.44611	-1.08579	0.27757	0.661472	78.882	55.8096	44.0473	50.0961	67.3458	47.0717
FBgn0040283	SMC1	72.8361	0.374791	0.344799	1.08698	0.277044	0.661472	57.8468	75.9961	66.6356	108.134	66.9215	87.3849
FBgn0085432	pan	398.204	-0.371531	0.341917	-1.08661	0.277208	0.661472	339.193	498.725	337.696	314.017	418.959	325.856
FBgn0037513	pyd3	371.26	0.409339	0.377514	1.0843	0.278231	0.662508	141.988	290.923	347.86	237.651	216.455	292.756
FBgn0010282	TfIIFalpha	122.921	-0.464726	0.429243	-1.08266	0.278958	0.663345	113.064	204.24	115.201	117.909	158.652	116.555
FBgn0011746	ana	69.0441	-1.04091	0.961261	-1.08286	0.278871	0.663345	165.652	78.371	46.3061	71.4786	122.012	58.8923
FBgn0025638	Roc1a	413.288	0.248897	0.230142	1.0815	0.279476	0.664132	333.934	436.978	547.767	380.608	385.456	464.188
FBgn0001404	egh	177.639	-0.419486	0.38848	-1.07981	0.280225	0.664442	191.946	195.927	147.954	142.346	193.937	145.15
FBgn0015379	dod	191.451	-0.322387	0.298836	-1.07881	0.280674	0.664442	220.87	212.552	202.166	146.012	216.711	174.089
FBgn0027054	CSN4	102.051	-0.442491	0.410091	-1.07901	0.280585	0.664442	149.876	99.7449	80.1886	100.192	124.81	90.1904
FBgn0030494	Cpr12A	159.176	0.603815	0.559777	1.07867	0.280734	0.664442	107.805	246.987	374.966	171.06	177.396	273.013
FBgn0035432	ZnT63C	99.5113	0.595708	0.552224	1.07874	0.280702	0.664442	31.5528	71.2464	68.8944	91.0283	51.3996	79.9613
FBgn0039907	lgs	117.134	-0.44214	0.40948	-1.07976	0.280249	0.664442	163.023	118.744	73.4121	130.128	140.883	101.77
FBgn0003942	RpS27A	6259.44	0.285151	0.264959	1.07621	0.281835	0.665273	5035.3	5343.48	8151	4501.93	5189.39	6326.47
FBgn0005632	faf	109.089	0.51257	0.476425	1.07587	0.281987	0.665273	68.3644	99.7449	120.848	122.186	84.0547	121.517
FBgn0028685	Rpt4	224.214	-0.320762	0.298003	-1.07637	0.281761	0.665273	249.793	277.861	211.201	212.603	263.827	211.902
FBgn0038842	hdly	136.172	0.375318	0.348881	1.07578	0.282026	0.665273	107.805	151.992	168.283	173.504	129.899	170.893
FBgn0263352	Unr	1187.53	-0.403647	0.375144	-1.07598	0.281937	0.665273	1057.02	1294.31	853.839	924.945	1175.66	889.392
FBgn0011455	ND-SGDH	640.048	0.419027	0.390065	1.07425	0.282712	0.666445	234.017	492.787	666.356	317.072	363.402	491.714
FBgn0010280	Taf4	131.001	-0.460684	0.430689	-1.06964	0.284779	0.667055	184.058	157.929	100.518	146.012	170.994	123.265
FBgn0020503	CLIP-190	82.4341	-0.424556	0.396977	-1.06947	0.284857	0.667055	86.7702	61.7468	46.3061	61.0928	74.2585	53.6994
FBgn0027561	CG18659	66.4373	-0.38522	0.360022	-1.06999	0.284624	0.667055	73.6232	67.684	42.9178	62.9256	70.6536	52.9217
FBgn0032717	CG10600	86.7327	-0.44929	0.419157	-1.07189	0.28377	0.667055	160.393	72.4338	60.9885	103.247	116.414	82.1177
FBgn0035334	CG8993	271.635	0.462043	0.431777	1.0701	0.284575	0.667055	149.876	218.489	335.437	177.78	184.182	256.608
FBgn0035980	mRRF1	84.6622	0.526374	0.492075	1.0697	0.284753	0.667055	36.8116	66.4966	114.071	41.5431	51.6541	77.8071
FBgn0037956	CG6959	109.918	0.370396	0.346163	1.07	0.284617	0.667055	128.841	92.6203	106.165	172.893	110.73	139.529
FBgn0038536	CG7655	83.5489	-0.36691	0.341965	-1.07295	0.283295	0.667055	94.6584	71.2464	60.9885	64.7584	82.9524	62.8734
FBgn0052428	CG32428	64.1456	0.606872	0.566675	1.07093	0.284199	0.667055	26.294	66.4966	77.9298	69.0349	46.3953	73.4823
FBgn0267790	rump	379.318	-0.331438	0.309723	-1.07011	0.284569	0.667055	439.11	419.166	350.119	331.734	429.138	340.927
FBgn0001114	Glt	343.886	0.430416	0.402865	1.06839	0.285346	0.667415	362.857	384.73	537.603	471.025	373.794	504.314
FBgn0027086	IleRS	257.447	-0.347377	0.32517	-1.06829	0.285388	0.667415	178.799	301.61	193.13	189.999	240.204	191.564
FBgn0026418	Hsc70Cb	493.763	-0.334578	0.313599	-1.0669	0.286018	0.668446	483.81	496.35	378.355	398.936	490.08	388.645
FBgn0004390	RasGAP1	64.236	0.75412	0.7076	1.06574	0.286539	0.668781	42.0704	45.1227	35.0119	111.189	43.5966	73.1004
FBgn0250754	CG42232	100.52	-0.519056	0.486886	-1.06607	0.286391	0.668781	199.834	102.12	83.5769	123.407	150.977	103.492
FBgn0038989	CG6937	105.887	-0.477262	0.448052	-1.06519	0.286788	0.668921	113.064	134.181	101.648	77.5878	123.622	89.6177
FBgn0038653	Octalpha2R	126.587	-0.439047	0.412363	-1.06471	0.287007	0.668989	173.54	166.242	150.212	101.414	169.891	125.813
FBgn0040324	Ephrin	115.874	0.492526	0.463017	1.06373	0.287451	0.669141	84.1408	78.371	111.812	116.076	81.2559	113.944
FBgn0283499	InR	317.029	-0.388384	0.364999	-1.06407	0.287297	0.669141	276.087	360.982	190.871	296.3	318.534	243.586
FBgn0016984	sktl	64.7267	0.52738	0.496291	1.06264	0.287944	0.669409	49.9586	75.9961	79.0592	105.08	62.9774	92.0694
FBgn0037737	Pnn	99.5041	0.496769	0.467312	1.06304	0.287766	0.669409	76.2526	83.1208	134.401	92.2501	79.6867	113.325
FBgn0013343	Syx1A	300.146	-0.385616	0.363257	-1.06155	0.28844	0.670121	184.058	289.735	147.954	216.879	236.897	182.417
FBgn0037093	Cdk12	114.535	-0.382971	0.360912	-1.06112	0.288635	0.670134	141.988	115.182	90.3534	104.469	128.585	97.411
FBgn0004240	DptA	657.396	1.65132	1.56801	1.05313	0.292282	0.67033	541.657	537.91	3041.52	350.062	539.783	1695.79
FBgn0004244	Rdl	120.613	-1.34538	1.27441	-1.05569	0.29111	0.67033	110.435	65.3092	19.2001	49.4852	87.872	34.3426
FBgn0004797	mdy	100.371	0.636698	0.602986	1.05591	0.29101	0.67033	13.147	90.2454	88.0945	81.2534	51.6962	84.674
FBgn0011217	eff	1828.68	0.235982	0.222636	1.05995	0.289169	0.67033	1695.96	1673.1	2222.69	1747.25	1684.53	1984.97
FBgn0013279	Hsp70Bc	273.915	-1.5067	1.43128	-1.05269	0.292482	0.67033	81.5114	172.179	15.8118	73.3113	126.845	44.5616
FBgn0015298	Srp19	95.3608	0.373654	0.353942	1.05569	0.291108	0.67033	65.735	70.0589	103.906	74.5332	67.897	89.2198
FBgn0015774	NetB	88.8336	0.89631	0.849613	1.05496	0.291443	0.67033	63.1056	18.999	18.0707	129.517	41.0523	73.7937
FBgn0015834	eIF3i	742.461	0.155025	0.147211	1.05307	0.292307	0.67033	665.238	628.155	754.451	684.239	646.697	719.345
FBgn0022382	Pka-R2	120.691	0.588075	0.558867	1.05226	0.292679	0.67033	92.029	61.7468	112.942	115.465	76.8879	114.204
FBgn0026379	Pten	76.5394	0.546695	0.517376	1.05667	0.290663	0.67033	89.3996	42.7478	76.8004	109.967	66.0737	93.3837
FBgn0028342	ATPsyndelta	1186.63	-0.345869	0.32769	-1.05547	0.291208	0.67033	880.849	875.143	893.369	491.186	877.996	692.277
FBgn0030056	CAH3	99.4797	0.368386	0.349328	1.05456	0.291629	0.67033	68.3644	97.37	132.142	88.5845	82.8672	110.363
FBgn0033257	sand	65.0295	-0.839058	0.796358	-1.05362	0.292057	0.67033	110.435	72.4338	65.5062	36.6557	91.4343	51.0809
FBgn0035767	Cln7	108.512	0.42913	0.40514	1.05921	0.289502	0.67033	118.323	110.432	112.942	192.442	114.377	152.692
FBgn0037213	CG12581	76.3044	0.634845	0.60097	1.05637	0.2908	0.67033	70.9938	64.1217	53.0826	154.565	67.5578	103.824
FBgn0041210	HDAC4	148.817	-0.341394	0.323326	-1.05588	0.291022	0.67033	178.799	163.867	137.789	131.96	171.333	134.875
FBgn0051363	Jupiter	2285.33	0.298273	0.281939	1.05793	0.290087	0.67033	1890.54	1950.96	2091.68	2631.27	1920.75	2361.47
FBgn0053558	mim	149.971	-0.423093	0.402098	-1.05222	0.292701	0.67033	81.5114	84.3082	29.3648	91.0283	82.9098	60.1965
FBgn0085430	CG34401	204.651	0.426446	0.404311	1.05475	0.29154	0.67033	176.17	153.18	153.601	285.303	164.675	219.452
FBgn0267385	PyK	974.367	-0.393903	0.373189	-1.05551	0.291194	0.67033	917.661	802.709	771.392	538.227	860.185	654.81
FBgn0270924	zf30C	85.5729	0.454169	0.428321	1.06035	0.288987	0.67033	113.064	70.0589	81.318	162.507	91.5616	121.912
FBgn0029939	CG9650	123.586	-0.538471	0.513088	-1.04947	0.293961	0.671912	163.023	167.429	83.5769	142.957	165.226	113.267
FBgn0034504	CG8929	188.264	-0.336703	0.320822	-1.0495	0.293947	0.671912	241.905	194.74	133.271	207.715	218.322	170.493
FBgn0038662	Mpc1	104.592	0.526781	0.501852	1.04967	0.293868	0.671912	65.735	78.371	147.954	62.9256	72.053	105.44
FBgn0053126	NLaz	102.31	0.475949	0.453749	1.04893	0.294212	0.672051	84.1408	79.5584	132.142	95.9157	81.8496	114.029
FBgn0036516	CG7656	179.592	-0.328846	0.313669	-1.04839	0.294461	0.672185	191.946	193.553	149.083	157.619	192.749	153.351
FBgn0029891	Pink1	103.528	-0.417423	0.399285	-1.04542	0.295827	0.673452	141.988	66.4966	63.2474	86.7518	104.242	74.9996
FBgn0031436	ND-B17.2	374.385	0.436048	0.417337	1.04484	0.296099	0.673452	212.981	197.115	382.872	173.504	205.048	278.188
FBgn0039136	CG5902	249.104	0.252318	0.241406	1.0452	0.29593	0.673452	234.017	238.675	276.707	286.525	236.346	281.616
FBgn0050443	Opbp	70.621	0.390413	0.373325	1.04577	0.295666	0.673452	55.2174	51.0599	60.9885	76.366	53.1387	68.6773
FBgn0259243	Pka-R1	214.018	0.322519	0.308718	1.04471	0.296159	0.673452	141.988	194.74	195.389	230.32	168.364	212.854
FBgn0283468	slmb	123.198	0.317356	0.303499	1.04566	0.295718	0.673452	128.841	103.307	138.918	146.012	116.074	142.465
FBgn0036341	Syx13	74.0313	0.509371	0.487797	1.04423	0.29638	0.673522	92.029	56.9971	134.401	75.1441	74.5131	104.772
FBgn0011787	mRpL12	489.867	-0.436705	0.41842	-1.0437	0.296625	0.673553	407.557	402.542	390.778	209.548	405.05	300.163
FBgn0011837	Tis11	194.641	0.475365	0.455604	1.04337	0.296775	0.673553	199.834	170.991	269.931	244.371	185.413	257.151
FBgn0262737	mub	3049.04	-0.305266	0.293085	-1.04156	0.297615	0.675027	2858.16	3278.52	2503.92	2464.48	3068.34	2484.2
FBgn0016917	Stat92E	241.715	0.294994	0.284775	1.03588	0.300256	0.676085	236.646	231.551	306.072	268.808	234.098	287.44
FBgn0023175	Prosalpha7	364.124	0.231237	0.222728	1.0382	0.299175	0.676085	339.193	344.357	428.049	376.332	341.775	402.19
FBgn0027548	nito	93.3437	0.416132	0.400236	1.03972	0.298472	0.676085	92.029	91.4328	105.036	138.681	91.7309	121.858
FBgn0032815	CG10462	106.19	0.443029	0.427788	1.03563	0.300376	0.676085	92.029	90.2454	115.201	131.96	91.1372	123.58
FBgn0033636	tou	151.072	-0.356324	0.343751	-1.03658	0.299934	0.676085	228.758	151.992	103.906	186.944	190.375	145.425
FBgn0034644	CG10082	222.771	-0.279487	0.269194	-1.03824	0.29916	0.676085	189.317	162.679	120.848	164.34	175.998	142.594
FBgn0038652	CG7720	68.4429	-0.511778	0.494004	-1.03598	0.300212	0.676085	115.694	102.12	70.0239	81.8643	108.907	75.9441
FBgn0051992	gw	648.151	0.260877	0.251197	1.03853	0.299023	0.676085	410.187	580.658	588.426	607.873	495.422	598.15
FBgn0263133	mEFG1	76.1572	-0.491546	0.473621	-1.03785	0.299342	0.676085	89.3996	43.9353	48.5649	43.3759	66.6674	45.9704
FBgn0263599	l(3)72Ab	90.0899	-0.365838	0.353126	-1.036	0.300203	0.676085	84.1408	131.806	82.4474	88.5845	107.973	85.516
FBgn0264493	rdx	251.875	0.331431	0.319182	1.03838	0.299094	0.676085	168.282	185.241	192.001	252.924	176.761	222.463
FBgn0264855	AP-2alpha	122.723	0.532286	0.513439	1.03671	0.299872	0.676085	65.735	115.182	111.812	153.343	90.4583	132.578
FBgn0034791	EMC8-9	65.5515	0.446586	0.431787	1.03427	0.301009	0.676648	28.9234	52.2473	70.0239	47.0414	40.5854	58.5327
FBgn0259979	Cndp2	97.4727	0.432436	0.418076	1.03435	0.300974	0.676648	94.6584	74.8087	98.2593	127.073	84.7336	112.666
FBgn0000044	Act57B	497.025	-0.390723	0.377998	-1.03366	0.301294	0.676858	599.503	756.399	503.72	532.118	677.951	517.919
FBgn0052512	CG32512	98.8071	-0.537457	0.520759	-1.03206	0.302042	0.678108	115.694	125.869	73.4121	92.861	120.781	83.1366
FBgn0032013	Scgalpha	89.4174	-0.49418	0.47958	-1.03044	0.302802	0.678825	52.588	72.4338	53.0826	37.8775	62.5109	45.4801
FBgn0033816	CG4679	80.4064	-0.421359	0.408832	-1.03064	0.30271	0.678825	57.8468	72.4338	51.9532	47.0414	65.1403	49.4973
FBgn0260934	par-1	359.598	0.318855	0.309522	1.03016	0.302937	0.678825	326.046	359.794	396.425	460.029	342.92	428.227
FBgn0008635	betaCOP	78.5025	-0.454459	0.441555	-1.02922	0.303374	0.679283	94.6584	116.369	56.4709	97.1375	105.514	76.8042
FBgn0031213	galectin	103.544	0.511223	0.49693	1.02876	0.303591	0.679283	78.882	48.685	115.201	64.1474	63.7835	89.674
FBgn0031392	AIF	124.482	-0.498724	0.4851	-1.02808	0.30391	0.679283	76.2526	118.744	64.3768	75.1441	97.4983	69.7605
FBgn0263977	Tim17b	538.723	0.387644	0.376971	1.02831	0.303803	0.679283	344.452	516.536	774.78	359.837	430.494	567.308
FBgn0029148	NHP2	291.299	-0.391423	0.380967	-1.02745	0.30421	0.679523	189.317	243.425	212.33	121.575	216.371	166.953
FBgn0030669	CG9240	71.5382	0.374759	0.365039	1.02663	0.304596	0.679776	57.8468	58.1845	67.765	81.8643	58.0157	74.8147
FBgn0263144	bin3	241.459	-0.393818	0.383692	-1.02639	0.304707	0.679776	302.381	214.927	172.801	217.49	258.654	195.146
FBgn0029594	CG14806	107.91	0.413943	0.403771	1.02519	0.305273	0.680196	86.7702	70.0589	119.718	87.9736	78.4146	103.846
FBgn0031285	CG3662	182.782	0.472481	0.460878	1.02518	0.30528	0.680196	189.317	135.368	181.836	264.532	162.342	223.184
FBgn0043012	AP-2sigma	89.7866	0.468197	0.457076	1.02433	0.305679	0.680656	68.3644	80.7459	126.495	82.4753	74.5551	104.485
FBgn0000064	Ald1	7379.04	-0.495438	0.484274	-1.02305	0.306283	0.681093	4041.39	5794.7	4350.51	2629.43	4918.05	3489.97
FBgn0011474	PR-Set7	102.696	0.438125	0.428404	1.02269	0.306453	0.681093	70.9938	86.6831	71.1533	142.346	78.8384	106.75
FBgn0039113	udt	86.4628	0.654296	0.640205	1.02201	0.306776	0.681382	99.9172	55.8096	55.3414	185.111	77.8634	120.226
FBgn0031738	CG9171	121.242	0.465446	0.455955	1.02082	0.307342	0.682211	60.4762	130.618	135.53	135.015	95.5473	135.273
FBgn0003415	skd	174.844	-0.378241	0.37238	-1.01574	0.309753	0.683187	178.799	197.115	112.942	175.336	187.957	144.139
FBgn0003716	tkv	80.6819	0.4823	0.473929	1.01766	0.308837	0.683187	70.9938	56.9971	38.4002	135.626	63.9955	87.0131
FBgn0011726	tsr	2890.02	0.321987	0.317099	1.01542	0.309907	0.683187	2148.22	2406.94	3807.26	1892.65	2277.58	2849.96
FBgn0032130	brwl	76.712	0.490017	0.480847	1.01907	0.308169	0.683187	63.1056	89.058	127.624	89.8064	76.0818	108.715
FBgn0034793	asrij	201.864	-0.362648	0.357067	-1.01563	0.309806	0.683187	194.576	178.116	168.283	122.186	186.346	145.234
FBgn0034897	Sesn	509.531	0.265729	0.261024	1.01802	0.308667	0.683187	202.464	265.986	320.754	251.091	234.225	285.923
FBgn0036501	CG7272	77.594	0.450826	0.442814	1.0181	0.308633	0.683187	28.9234	59.372	74.5415	53.1507	44.1477	63.8461
FBgn0037580	DppIII	136.457	-0.37641	0.370351	-1.01636	0.309459	0.683187	131.47	150.805	127.624	92.2501	141.137	109.937
FBgn0037613	Cks85A	438.39	0.463421	0.456239	1.01574	0.309752	0.683187	452.257	438.165	841.416	387.939	445.211	614.677
FBgn0053087	LRP1	116.551	-0.341952	0.336656	-1.01573	0.309758	0.683187	128.841	109.244	72.2827	111.8	119.043	92.0412
FBgn0263220	Hk	64.586	0.530576	0.521727	1.01696	0.309172	0.683187	34.1822	34.4357	49.6943	49.4852	34.309	49.5898
FBgn0030960	Atg101	64.2717	0.425699	0.42012	1.01328	0.310926	0.683243	49.9586	79.5584	84.7063	93.472	64.7585	89.0891
FBgn0033355	CG13748	248.847	0.413774	0.408071	1.01397	0.310595	0.683243	270.828	182.866	381.743	219.934	226.847	300.838
FBgn0033929	Tfb1	110.904	-0.397269	0.392196	-1.01293	0.311092	0.683243	139.358	149.617	102.777	116.687	144.488	109.732
FBgn0037249	eIF3a	325.024	-0.306416	0.301912	-1.01492	0.310145	0.683243	373.375	341.983	265.413	310.962	357.679	288.188
FBgn0250906	Pgk	1163.05	-0.418802	0.413382	-1.01311	0.311008	0.683243	1206.89	1139.94	1072.95	683.628	1173.42	878.287
FBgn0261284	bou	76.8173	0.673251	0.663867	1.01413	0.310518	0.683243	78.882	55.8096	72.2827	139.902	67.3458	106.093
FBgn0034351	rswl	74.2764	0.520458	0.514025	1.01251	0.311292	0.683258	47.3292	39.1855	68.8944	54.3726	43.2574	61.6335
FBgn0029711	Usf	146.168	-0.367677	0.364187	-1.00958	0.312696	0.683792	120.952	162.679	100.518	120.964	141.816	110.741
FBgn0036762	CG7430	752.978	-0.353407	0.349969	-1.00982	0.312579	0.683792	610.021	813.396	608.756	508.903	711.708	558.829
FBgn0040660	CG13551	1214.09	0.259656	0.257013	1.01028	0.312361	0.683792	1125.38	1021.2	1533.75	1036.74	1073.29	1285.25
FBgn0044020	Roc2	68.2253	0.471696	0.466707	1.01069	0.312165	0.683792	47.3292	64.1217	88.0945	69.6458	55.7255	78.8702
FBgn0051852	Tap42	77.6665	-0.356443	0.352796	-1.01034	0.312334	0.683792	102.547	78.371	79.0592	61.0928	90.4588	70.076
FBgn0086707	ncm	121.986	-0.447476	0.442964	-1.01018	0.312407	0.683792	136.729	200.677	90.3534	157.619	168.703	123.986
FBgn0260400	elav	322.434	-0.350153	0.347078	-1.00886	0.313042	0.684127	376.004	375.231	245.083	342.731	375.618	293.907
FBgn0037378	CG2046	73.0222	-0.600054	0.595546	-1.00757	0.313661	0.685056	139.358	28.4985	56.4709	50.707	83.9284	53.5889
FBgn0031483	CG9641	79.7733	-0.397553	0.394798	-1.00698	0.313946	0.685255	120.952	80.7459	67.765	81.8643	100.849	74.8147
FBgn0039774	CDase	107.522	0.412772	0.410094	1.00653	0.31416	0.6853	78.882	90.2454	112.942	113.633	84.5637	113.287
FBgn0027588	GCS2alpha	275.505	-0.32604	0.324325	-1.00529	0.314757	0.686178	454.886	407.292	213.46	469.193	431.089	341.326
FBgn0039929	CG11076	344.428	0.399759	0.397857	1.00478	0.315003	0.686292	276.087	299.235	472.096	289.58	287.661	380.838
FBgn0034919	CG5569	83.3568	0.550668	0.548277	1.00436	0.315204	0.686307	44.6998	32.0609	75.6709	36.0447	38.3803	55.8578
FBgn0031939	CG13796	262.417	-0.42321	0.421903	-1.0031	0.315813	0.686364	155.135	211.364	181.836	95.3048	183.249	138.57
FBgn0039175	beta-PheRS	91.6044	-0.612858	0.610901	-1.0032	0.315762	0.686364	99.9172	97.37	41.7884	86.1408	98.6436	63.9646
FBgn0039261	Ythdf	206.244	-0.327838	0.326604	-1.00378	0.315486	0.686364	262.94	185.241	124.236	226.043	224.09	175.14
FBgn0010391	Gtp-bp	126.287	-0.35376	0.35312	-1.00181	0.316435	0.686535	155.135	111.619	71.1533	131.96	133.377	101.557
FBgn0010417	Taf6	94.7167	-0.44169	0.441531	-1.00036	0.317136	0.686535	81.5114	130.618	49.6943	106.912	106.065	78.3034
FBgn0011586	e(r)	183.386	0.31257	0.312637	0.999784	0.317415	0.686535	176.17	162.679	229.272	191.22	169.425	210.246
FBgn0026192	par-6	76.8036	0.487996	0.48742	1.00118	0.316738	0.686535	65.735	61.7468	58.7297	117.909	63.7409	88.3194
FBgn0030520	Pdcd4	1046.81	-0.237613	0.237813	-0.999157	0.317718	0.686535	1122.75	1161.32	932.898	1004.37	1142.03	968.632
FBgn0030693	CG8974	92.4618	0.340907	0.340654	1.00074	0.31695	0.686535	65.735	90.2454	127.624	76.9769	77.9902	102.301
FBgn0035374	mRpS35	185.107	-0.366971	0.367102	-0.999643	0.317483	0.686535	155.135	182.866	175.06	91.0283	169	133.044
FBgn0050000	GstT1	131.241	0.441158	0.441635	0.998921	0.317833	0.686535	147.246	83.1208	207.813	101.414	115.184	154.613
FBgn0259219	CG42319	234.541	-0.518497	0.518483	-1.00003	0.317297	0.686535	189.317	226.801	172.801	119.131	208.059	145.966
FBgn0266582	ND-30	425.015	-0.323854	0.324029	-0.999459	0.317573	0.686535	249.793	362.169	306.072	189.388	305.981	247.73
FBgn0011739	wts	179.276	-0.335014	0.335672	-0.998038	0.318261	0.687039	199.834	166.242	126.495	160.674	183.038	143.584
FBgn0051915	CG31915	64.2058	0.36372	0.365023	0.99643	0.319041	0.687884	60.4762	74.8087	91.4828	85.5299	67.6424	88.5063
FBgn0061200	Nup153	235.238	-0.330039	0.331667	-0.995091	0.319692	0.688867	312.899	292.11	246.213	234.596	302.504	240.405
FBgn0024320	Npc1a	72.7484	0.38096	0.383108	0.994394	0.320031	0.688881	57.8468	60.5594	65.5062	87.9736	59.2031	76.7399
FBgn0024558	Dph5	104.201	0.428615	0.43143	0.993476	0.320478	0.688881	107.805	52.2473	143.436	67.2021	80.0264	105.319
FBgn0030350	SelG	111.718	0.380256	0.382514	0.994098	0.320175	0.688881	97.2878	39.1855	105.036	64.1474	68.2367	84.5916
FBgn0038826	Syp	3420.44	-0.226578	0.227989	-0.99381	0.320315	0.688881	2908.12	3412.7	2552.48	2852.42	3160.41	2702.45
FBgn0039008	CG6972	689.285	0.518309	0.522221	0.992509	0.320949	0.689475	394.41	780.148	1111.35	577.327	587.279	844.337
FBgn0002638	Rcc1	117.714	-0.463295	0.467998	-0.98995	0.322198	0.68998	152.505	142.493	116.33	97.7485	147.499	107.039
FBgn0010438	mtSSB	171.589	0.441863	0.446097	0.99051	0.321925	0.68998	84.1408	160.304	243.954	96.5266	122.223	170.24
FBgn0024189	sns	933.171	-0.408762	0.413531	-0.988467	0.322924	0.68998	1222.67	1513.99	998.405	1064.24	1368.33	1031.32
FBgn0031980	RpL36A	5729.7	0.328712	0.332427	0.988826	0.322748	0.68998	4546.23	5126.18	8227.8	3925.21	4836.2	6076.51
FBgn0032666	CG5758	137.794	0.405253	0.409276	0.990169	0.322092	0.68998	102.547	119.931	100.518	193.664	111.239	147.091
FBgn0038428	CG14894	70.865	0.433924	0.438636	0.989258	0.322537	0.68998	42.0704	68.8715	89.2239	65.9802	55.4709	77.6021
FBgn0038958	CG13857	75.3149	0.98011	0.989678	0.990332	0.322012	0.68998	76.2526	52.2473	72.2827	179.613	64.25	125.948
FBgn0265574	Cdc5	78.3531	-0.376908	0.381318	-0.988434	0.32294	0.68998	89.3996	91.4328	71.1533	68.4239	90.4162	69.7886
FBgn0283471	wupA	1476.31	-0.51276	0.517695	-0.990466	0.321947	0.68998	1306.81	1586.42	1367.72	662.246	1446.62	1014.98
FBgn0030510	CG12177	113.634	-0.526397	0.533809	-0.986114	0.324077	0.691288	110.435	70.0589	75.6709	48.8742	90.2469	62.2726
FBgn0035983	CG4080	144.915	-0.399913	0.40576	-0.98559	0.324334	0.691288	92.029	212.552	112.942	122.797	152.29	117.869
FBgn0040022	Set1	96.8634	-0.410629	0.416506	-0.985891	0.324187	0.691288	155.135	98.5575	80.1886	106.912	126.846	93.5505
FBgn0053143	CG33143	381.179	-0.489427	0.496299	-0.986152	0.324058	0.691288	118.323	251.737	142.307	124.629	185.03	133.468
FBgn0013718	nuf	150.196	0.397269	0.403729	0.983999	0.325116	0.692119	105.176	73.6212	88.0945	141.735	89.3986	114.915
FBgn0259824	Hip14	88.4672	0.462615	0.470016	0.984254	0.324991	0.692119	70.9938	64.1217	93.7416	91.6392	67.5578	92.6904
FBgn0035827	Srp9	106.391	0.481601	0.489872	0.983117	0.32555	0.692626	84.1408	79.5584	135.53	93.472	81.8496	114.501
FBgn0014075	Uggt	68.4187	0.460664	0.468986	0.982254	0.325975	0.692696	73.6232	49.8725	54.212	110.578	61.7478	82.395
FBgn0285917	sbb	522.365	0.379115	0.385931	0.982339	0.325933	0.692696	410.187	472.601	424.661	723.339	441.394	574
FBgn0011648	Mad	166.011	0.402262	0.410092	0.980908	0.326638	0.693273	107.805	135.368	172.801	151.51	121.587	162.155
FBgn0027567	CG8108	275.584	-0.298613	0.304388	-0.981027	0.326579	0.693273	341.822	276.673	187.483	309.74	309.248	248.612
FBgn0011284	RpS4	6851.31	-0.229361	0.234048	-0.979977	0.327098	0.693798	6878.51	6839.65	6240.03	5462.92	6859.08	5851.47
FBgn0031458	aph-1	90.8587	0.426131	0.435428	0.97865	0.327753	0.693798	55.2174	90.2454	88.0945	111.189	72.7314	99.6417
FBgn0031764	CG9107	67.0768	-0.385527	0.394074	-0.978311	0.327921	0.693798	73.6232	70.0589	55.3414	54.3726	71.8411	54.857
FBgn0035213	CG2199	117.89	-0.377338	0.385363	-0.979176	0.327493	0.693798	97.2878	143.68	86.9651	100.803	120.484	93.8841
FBgn0035807	CG7492	88.1419	-0.357548	0.365582	-0.978023	0.328063	0.693798	110.435	86.6831	76.8004	75.1441	98.559	75.9722
FBgn0039219	CG13630	245.203	-0.367097	0.374811	-0.97942	0.327373	0.693798	173.54	232.738	197.648	121.575	203.139	159.611
FBgn0022160	Gpo1	219.037	-0.537828	0.55153	-0.975157	0.329483	0.696384	60.4762	111.619	67.765	53.1507	86.0478	60.4579
FBgn0036374	Spt20	87.0996	-0.435066	0.446654	-0.974057	0.330028	0.697121	76.2526	151.992	100.518	72.7004	114.122	86.6093
FBgn0030336	CG1578	176.87	0.350078	0.359737	0.97315	0.330479	0.697477	141.988	121.119	204.424	130.739	131.553	167.582
FBgn0250848	26-29-p	1298.88	0.442094	0.454398	0.972923	0.330591	0.697477	1256.85	1119.76	1567.63	1659.89	1188.3	1613.76
FBgn0027070	Ugt36E1	65.9646	-0.669502	0.689208	-0.971408	0.331345	0.698505	15.7764	56.9971	36.1413	12.8295	36.3867	24.4854
FBgn0033378	tsu	204.867	0.347558	0.357883	0.971149	0.331474	0.698505	170.911	201.865	325.272	154.565	186.388	239.918
FBgn0016059	Sema1b	164.694	0.500995	0.516405	0.97016	0.331967	0.698711	99.9172	174.554	114.071	276.75	137.235	195.411
FBgn0050035	Tret1-1	224.728	-0.460522	0.474552	-0.970434	0.33183	0.698711	262.94	235.113	221.366	141.124	249.027	181.245
FBgn0027094	AlaRS	217.521	-0.331857	0.34262	-0.968586	0.332752	0.69953	170.911	218.489	137.789	172.893	194.7	155.341
FBgn0262518	Rab8	106.458	0.419096	0.432523	0.968957	0.332567	0.69953	65.735	80.7459	85.8357	111.189	73.2404	98.5123
FBgn0004888	Scsalpha1	786.185	0.26074	0.269945	0.965902	0.334093	0.701889	491.698	635.28	831.251	528.453	563.489	679.852
FBgn0025582	eIF3e	668.426	-0.211818	0.219395	-0.965463	0.334313	0.701889	783.561	629.343	643.768	571.829	706.452	607.798
FBgn0032721	CG10602	186.471	0.356905	0.369944	0.964755	0.334668	0.701889	126.211	207.802	233.789	200.995	167.007	217.392
FBgn0042111	CG18766	82.0132	0.364005	0.377254	0.96488	0.334605	0.701889	102.547	71.2464	96.0004	122.186	86.8965	109.093
FBgn0003891	tud	415.075	-0.2619	0.271929	-0.963116	0.335489	0.702746	404.928	401.354	260.895	408.1	403.141	334.498
FBgn0028546	ics	168.884	-0.345853	0.359234	-0.962751	0.335673	0.702746	157.764	174.554	160.377	103.858	166.159	132.117
FBgn0031092	CG9577	124.851	-0.377578	0.39199	-0.963234	0.33543	0.702746	144.617	147.242	137.789	88.5845	145.93	113.187
FBgn0037749	CG9471	136.438	-0.425822	0.443008	-0.961206	0.336449	0.703538	70.9938	47.4976	58.7297	29.3245	59.2457	44.0271
FBgn0267795	Frl	147.278	0.446741	0.464685	0.961385	0.336359	0.703538	76.2526	119.931	103.906	166.172	98.092	135.039
FBgn0039039	lmd	197.195	-0.495279	0.515509	-0.960758	0.336674	0.703593	386.522	321.796	257.507	244.371	354.159	250.939
FBgn0023458	Rbcn-3A	89.2825	0.444316	0.462876	0.959903	0.337104	0.704076	47.3292	85.4956	65.5062	118.52	66.4124	92.0131
FBgn0037873	SdhC	366.044	0.429958	0.44841	0.95885	0.337634	0.704351	163.023	216.114	358.025	157.619	189.568	257.822
FBgn0263392	Tet	378.648	-0.294473	0.306996	-0.959208	0.337454	0.704351	486.439	422.728	299.296	438.035	454.584	368.665
FBgn0013432	bcn92	99.5934	-0.399619	0.417163	-0.957944	0.338091	0.704472	107.805	86.6831	102.777	45.8196	97.2443	74.2983
FBgn0036133	CG7638	191.322	-0.383589	0.400281	-0.958298	0.337912	0.704472	197.205	159.117	136.659	135.015	178.161	135.837
FBgn0016031	lama	138.431	-0.311215	0.325221	-0.956933	0.338601	0.704993	94.6584	134.181	115.201	75.1441	114.42	95.1723
FBgn0032156	CG13124	433.445	-0.262956	0.27488	-0.95662	0.338759	0.704993	465.404	534.348	447.249	389.161	499.876	418.205
FBgn0265140	Meltrin	131.617	0.36247	0.379048	0.956263	0.338939	0.704993	115.694	154.367	162.636	187.555	135.03	175.095
FBgn0026602	Ady43A	661.45	0.263843	0.276684	0.953589	0.340291	0.70589	617.909	657.841	971.299	565.719	637.875	768.509
FBgn0027594	drpr	65.5244	-0.435409	0.455988	-0.954869	0.339644	0.70589	73.6232	55.8096	22.5883	69.0349	64.7164	45.8116
FBgn0052296	Mrtf	199.049	-0.37264	0.390838	-0.953438	0.340368	0.70589	239.275	248.175	178.448	197.941	243.725	188.194
FBgn0259785	pzg	243.984	-0.318018	0.333456	-0.953704	0.340234	0.70589	368.116	337.233	248.472	315.239	352.674	281.855
FBgn0260747	Chchd2	1825.72	-0.29848	0.312712	-0.954489	0.339836	0.70589	1575.01	1591.17	1580.05	997.034	1583.09	1288.54
FBgn0028530	mTTF	64.2805	0.535016	0.561546	0.952756	0.340714	0.706192	49.9586	27.3111	56.4709	51.9289	38.6349	54.1999
FBgn0039269	veli	101.662	0.377771	0.397099	0.951326	0.341439	0.70728	84.1408	79.5584	141.177	73.3113	81.8496	107.244
FBgn0001230	Hsp68	320.918	-1.13924	1.19933	-0.9499	0.342163	0.707537	115.694	229.176	49.6943	106.912	172.435	78.3034
FBgn0010434	cora	116.137	-0.478543	0.503678	-0.950097	0.342063	0.707537	152.505	140.118	58.7297	149.066	146.312	103.898
FBgn0037608	mRpL19	141.024	-0.415937	0.437732	-0.950208	0.342006	0.707537	81.5114	159.117	107.295	77.5878	120.314	92.4412
FBgn0001280	janA	172.206	0.355769	0.375135	0.948375	0.342938	0.708552	210.352	143.68	289.131	161.285	177.016	225.208
FBgn0033194	Vps13	68.9849	-0.381269	0.402287	-0.947754	0.343255	0.708552	115.694	78.371	82.4474	64.7584	97.0323	73.6029
FBgn0039868	CG11563	67.424	0.548916	0.57897	0.94809	0.343084	0.708552	47.3292	24.9362	72.2827	31.1573	36.1327	51.72
FBgn0029502	Coq7	67.8691	-0.469381	0.495967	-0.946395	0.343947	0.709566	92.029	41.5604	54.212	39.7103	66.7947	46.9612
FBgn0052529	Hers	72.6926	-0.458045	0.484381	-0.94563	0.344337	0.709958	97.2878	62.9343	40.659	72.7004	80.1111	56.6797
FBgn0016694	Pdp1	1316.81	-0.447756	0.474944	-0.942756	0.345806	0.711849	599.503	1109.07	782.686	474.08	854.286	628.383
FBgn0030873	CG15814	74.6043	0.391318	0.415124	0.942653	0.345859	0.711849	36.8116	64.1217	50.8238	84.919	50.4667	67.8714
FBgn0032731	Swip-1	64.6203	0.586949	0.622289	0.943209	0.345574	0.711849	47.3292	60.5594	74.5415	88.5845	53.9443	81.563
FBgn0261791	SNRPG	137.62	0.347844	0.369638	0.94104	0.346684	0.713133	176.17	108.057	232.66	125.24	142.113	178.95
FBgn0033738	DUBAI	79.7437	0.32338	0.344026	0.939988	0.347224	0.713827	81.5114	55.8096	74.5415	91.0283	68.6605	82.7849
FBgn0023023	CRMP	148.014	0.270913	0.288703	0.938379	0.34805	0.71511	144.617	129.431	187.483	142.957	137.024	165.22
FBgn0040801	CG13053	361.161	0.734981	0.784021	0.937451	0.348526	0.715673	399.669	333.67	390.778	828.418	366.67	609.598
FBgn0031453	Bacc	2751.33	0.165047	0.17626	0.936384	0.349076	0.716385	2584.7	2658.68	3075.4	2806.6	2621.69	2941
FBgn0011706	rpr	97.3978	0.426919	0.456339	0.935531	0.349515	0.716455	86.7702	106.87	167.154	96.5266	96.8199	131.84
FBgn0033413	prel	86.1045	0.349565	0.373535	0.935829	0.349361	0.716455	63.1056	68.8715	97.1299	73.3113	65.9886	85.2206
FBgn0015614	CanB2	175.063	-0.229441	0.245963	-0.932828	0.350909	0.718547	147.246	204.24	149.083	156.398	175.743	152.74
FBgn0016076	vri	107.914	0.31482	0.337513	0.932764	0.350942	0.718547	63.1056	94.9951	82.4474	117.909	79.0504	100.178
FBgn0036052	CG10809	90.4849	-0.392971	0.421587	-0.932123	0.351273	0.718808	128.841	79.5584	49.6943	103.858	104.2	76.776
FBgn0259984	kuz	315.337	-0.312619	0.335975	-0.930483	0.352121	0.720127	431.222	312.297	258.637	335.399	371.759	297.018
FBgn0004876	cdi	194.034	-0.340389	0.36621	-0.92949	0.352635	0.720762	184.058	267.174	128.754	228.487	225.616	178.62
FBgn0031298	Atg4a	81.005	-0.307816	0.331385	-0.928878	0.352953	0.720994	94.6584	91.4328	73.4121	76.366	93.0456	74.889
FBgn0032261	CG6094	132.033	-0.410278	0.442028	-0.928172	0.353318	0.721324	102.547	89.058	85.8357	58.6491	95.8023	72.2424
FBgn0000404	CycA	66.8388	0.558054	0.601727	0.927421	0.353708	0.721703	60.4762	66.4966	54.212	131.96	63.4864	93.0862
FBgn0011016	SsRbeta	101.462	-0.402603	0.43526	-0.924971	0.354981	0.722203	163.023	93.8077	97.1299	94.0829	128.415	95.6064
FBgn0011725	twin	163.756	-0.311501	0.337582	-0.922741	0.356142	0.722203	218.24	137.743	137.789	144.179	177.992	140.984
FBgn0014092	CG4278	116.249	0.358796	0.38932	0.921596	0.356739	0.722203	73.6232	125.869	156.989	106.301	99.7459	131.645
FBgn0015543	snoRNA:Me28S-A1322	392.866	-0.449346	0.487786	-0.921194	0.356949	0.722203	289.234	442.915	399.814	140.513	366.074	270.164
FBgn0015756	RpL9	6624.21	-0.244148	0.263749	-0.925681	0.354612	0.722203	7785.66	6922.77	7551.28	4868.48	7354.21	6209.88
FBgn0023522	CG11596	80.039	-0.398108	0.430301	-0.925184	0.35487	0.722203	78.882	99.7449	71.1533	65.9802	89.3135	68.5667
FBgn0024321	NK7.1	116.429	-0.271482	0.293702	-0.924343	0.355308	0.722203	118.323	159.117	93.7416	137.459	138.72	115.6
FBgn0025839	ND-B14.5A	201.831	-0.387468	0.420675	-0.921065	0.357017	0.722203	173.54	143.68	166.024	77.5878	158.61	121.806
FBgn0027087	HisRS	217.672	-0.338703	0.367532	-0.921561	0.356758	0.722203	136.729	195.927	149.083	117.909	166.328	133.496
FBgn0034940	CG16787	81.5199	-0.396852	0.430358	-0.922145	0.356453	0.722203	52.588	71.2464	65.5062	32.3792	61.9172	48.9427
FBgn0036547	CG17032	72.5836	0.52709	0.570448	0.923994	0.35549	0.722203	113.064	75.9961	141.177	128.906	94.5302	135.041
FBgn0039857	RpL6	5660.66	-0.193915	0.209907	-0.923816	0.355582	0.722203	5243.03	5759.08	5225.81	4397.46	5501.05	4811.64
FBgn0052676	stx	100.614	-0.370488	0.401819	-0.922027	0.356515	0.722203	149.876	138.93	82.4474	138.681	144.403	110.564
FBgn0085443	spri	149.65	-0.293331	0.317127	-0.924965	0.354984	0.722203	178.799	184.053	147.954	148.455	181.426	148.205
FBgn0086708	stv	298.774	-0.712213	0.770985	-0.92377	0.355606	0.722203	194.576	325.358	178.448	139.902	259.967	159.175
FBgn0039558	BCAS2	81.1047	-0.378038	0.411034	-0.919724	0.357717	0.722625	118.323	83.1208	75.6709	76.9769	100.722	76.3239
FBgn0051523	CG31523	115.573	0.377601	0.410663	0.919492	0.357838	0.722625	47.3292	97.37	112.942	83.0862	72.3496	98.0139
FBgn0086686	l(3)L1231	305.822	0.33166	0.360691	0.919514	0.357827	0.722625	173.54	317.046	258.637	365.335	245.293	311.986
FBgn0002930	nec	68.1124	0.385871	0.420418	0.917825	0.35871	0.722735	65.735	61.7468	91.4828	75.1441	63.7409	83.3135
FBgn0031895	CG4497	97.517	0.523372	0.569635	0.918786	0.358208	0.722735	55.2174	104.495	118.589	114.854	79.856	116.722
FBgn0039115	CG10214	89.7581	0.387117	0.421649	0.918102	0.358566	0.722735	26.294	58.1845	72.2827	46.4305	42.2393	59.3566
FBgn0039688	Kul	70.9375	0.802118	0.873792	0.917973	0.358633	0.722735	42.0704	56.9971	37.2708	135.626	49.5338	86.4484
FBgn0035771	Sec63	67.8683	-0.299169	0.326472	-0.916371	0.359472	0.723858	68.3644	74.8087	51.9532	64.1474	71.5866	58.0503
FBgn0038976	Pfdn5	355.574	-0.336339	0.367271	-0.915777	0.359784	0.724072	307.64	402.542	363.672	203.439	355.091	283.556
FBgn0001224	Hsp23	12644.1	0.346566	0.379609	0.912957	0.361265	0.725449	9794.52	12031.1	17906.9	9849.99	10912.8	13878.4
FBgn0031216	Zir	157.087	0.23003	0.251973	0.912913	0.361288	0.725449	144.617	150.805	160.377	185.722	147.711	173.05
FBgn0032214	CG4968	137.748	0.319581	0.350033	0.913001	0.361242	0.725449	99.9172	87.8705	115.201	117.298	93.8939	116.249
FBgn0062442	Cisd2	560.779	0.298383	0.326692	0.913346	0.36106	0.725449	357.599	353.857	521.791	354.949	355.728	438.37
FBgn0013276	Hsp70Ab	115.396	-0.937003	1.02794	-0.911534	0.362014	0.726075	55.2174	78.371	5.64709	63.5365	66.7942	34.5918
FBgn0013987	MAPk-Ak2	176.083	0.334353	0.36698	0.911092	0.362247	0.726075	147.246	134.181	136.659	215.047	140.714	175.853
FBgn0029118	ScsbetaG	174.852	0.290988	0.3195	0.910761	0.362421	0.726075	84.1408	110.432	125.365	117.298	97.2863	121.332
FBgn0040309	Jafrac1	489.286	0.250836	0.275389	0.910841	0.362379	0.726075	347.081	327.733	380.614	420.318	337.407	400.466
FBgn0004880	scrt	80.8194	1.29072	1.41822	0.910096	0.362772	0.726365	42.0704	23.7488	20.3295	139.292	32.9096	79.8105
FBgn0015609	CadN	466.681	-0.321873	0.354178	-0.908788	0.363462	0.726924	376.004	461.914	282.354	388.55	418.959	335.452
FBgn0032015	Ostgamma	174.958	0.279805	0.307815	0.909006	0.363347	0.726924	128.841	176.928	151.342	222.989	152.885	187.165
FBgn0022985	qkr58E-2	262.699	-0.321529	0.354272	-0.907577	0.364102	0.72738	262.94	301.61	237.178	216.268	282.275	226.723
FBgn0030703	MSBP	175.431	0.282135	0.31075	0.907914	0.363924	0.72738	131.47	146.055	197.648	143.568	138.763	170.608
FBgn0260634	eIF4G2	260.882	-0.271064	0.29894	-0.906751	0.364539	0.727842	276.087	288.548	196.519	270.03	282.317	233.274
FBgn0033716	Den1	128.563	0.286766	0.316491	0.906079	0.364894	0.72814	92.029	146.055	140.048	157.008	119.042	148.528
FBgn0031995	CG8475	146.546	-0.36621	0.405611	-0.902859	0.366601	0.73031	163.023	123.494	99.3887	120.353	143.258	109.871
FBgn0033480	mRpL42	144.374	0.458606	0.507843	0.903047	0.366501	0.73031	78.882	110.432	197.648	67.2021	94.6569	132.425
FBgn0264273	Sema2b	91.5311	0.825888	0.914057	0.903541	0.366239	0.73031	81.5114	59.372	39.5296	208.326	70.4417	123.928
FBgn0024957	Irp-1B	85.6214	-0.337401	0.374019	-0.902096	0.367006	0.730705	84.1408	102.12	62.1179	85.5299	93.1303	73.8239
FBgn0038961	CG13850	170.349	0.470731	0.52206	0.90168	0.367227	0.730734	44.6998	129.431	156.989	92.2501	87.0654	124.62
FBgn0263197	Patronin	98.3994	-0.363173	0.403362	-0.900365	0.367926	0.731651	126.211	105.682	81.318	97.1375	115.947	89.2278
FBgn0284245	eEF1alpha1	8504.13	0.258613	0.287337	0.900036	0.368101	0.731651	10378.2	8181.46	9219.43	12976.7	9279.85	11098.1
FBgn0033029	Not3	219.822	-0.266288	0.296331	-0.898616	0.368857	0.732741	239.275	276.673	166.024	262.088	257.974	214.056
FBgn0032050	CG13096	132.778	-0.329072	0.366622	-0.89758	0.369409	0.733426	160.393	113.994	118.589	97.7485	137.194	108.169
FBgn0016687	Nurf-38	609.859	0.237409	0.264698	0.896908	0.369768	0.733726	510.104	574.721	658.45	623.757	542.412	641.104
FBgn0030066	Uros1	144.275	0.59258	0.661275	0.896116	0.370191	0.734153	15.7764	42.7478	62.1179	31.1573	29.2621	46.6376
FBgn0036702	CG6512	197.015	-0.344515	0.384788	-0.895337	0.370607	0.734566	134.099	147.242	116.33	106.301	140.671	111.316
FBgn0263773	fok	799.138	0.227312	0.254068	0.894693	0.370951	0.734837	801.967	756.399	1028.9	796.039	779.183	912.469
FBgn0002622	RpS3	6252.88	-0.197167	0.220644	-0.893596	0.371538	0.735587	6875.88	6102.25	6502.05	4818.39	6489.07	5660.22
FBgn0003165	pum	741.93	-0.235973	0.264659	-0.891613	0.3726	0.73665	646.833	744.524	528.567	653.693	695.679	591.13
FBgn0023001	melt	131.733	-0.442643	0.496939	-0.89074	0.373069	0.73665	170.911	167.429	98.2593	149.677	169.17	123.968
FBgn0029114	Tollo	82.5496	-0.660212	0.740516	-0.891557	0.372631	0.73665	173.54	99.7449	56.4709	114.854	136.643	85.6626
FBgn0030672	CG9281	208.89	0.390552	0.438502	0.890651	0.373116	0.73665	131.47	185.241	225.883	193.053	158.355	209.468
FBgn0263740	eIF2gamma	329.861	-0.246543	0.276741	-0.890881	0.372993	0.73665	397.04	300.422	295.907	287.747	348.731	291.827
FBgn0003204	ras	226.344	0.267282	0.301481	0.886564	0.375314	0.740575	128.841	213.739	203.295	217.49	171.29	210.393
FBgn0010303	hep	94.4012	-0.31339	0.353674	-0.886098	0.375565	0.740657	126.211	94.9951	67.765	105.691	110.603	86.7278
FBgn0035253	CG7971	173.101	-0.386493	0.436537	-0.885361	0.375962	0.740723	223.499	207.802	115.201	212.603	215.65	163.902
FBgn0050389	CG30389	200.068	-0.271876	0.307115	-0.885258	0.376017	0.740723	210.352	269.549	211.201	189.999	239.95	200.6
FBgn0034958	CG3907	120.449	-0.263286	0.297579	-0.88476	0.376286	0.74084	147.246	90.2454	94.871	96.5266	118.746	95.6988
FBgn0039465	Tsp97E	170.326	0.42481	0.480779	0.883587	0.376919	0.741673	92.029	180.491	143.436	226.654	136.26	185.045
FBgn0027066	Eb1	2479.18	0.32197	0.365314	0.881351	0.378128	0.743224	591.615	906.016	1069.56	809.479	748.816	939.519
FBgn0036004	Jarid2	166.516	-0.300172	0.340493	-0.88158	0.378004	0.743224	176.17	191.178	125.365	172.282	183.674	148.823
FBgn0261673	nemy	358.121	0.235842	0.267966	0.880118	0.378795	0.744122	255.052	273.111	337.696	287.136	264.081	312.416
FBgn0034142	CG8306	108.623	-0.334247	0.380059	-0.879461	0.379152	0.744408	212.981	125.869	115.201	148.455	169.425	131.828
FBgn0026181	Rok	116.068	-0.433904	0.493844	-0.878626	0.379604	0.744883	115.694	117.556	71.1533	100.803	116.625	85.9782
FBgn0024291	Sirt1	102.017	0.374464	0.427182	0.876591	0.380709	0.745845	44.6998	103.307	84.7063	113.633	74.0035	99.1694
FBgn0030584	CG14407	170.279	-0.449845	0.513075	-0.876763	0.380615	0.745845	176.17	140.118	146.824	84.919	158.144	115.872
FBgn0033426	CG1814	125.212	-0.340024	0.38808	-0.876169	0.380938	0.745845	107.805	154.367	107.295	102.636	131.086	104.965
FBgn0043455	CG5986	70.6582	-0.37533	0.428359	-0.876206	0.380918	0.745845	86.7702	72.4338	59.8591	61.7037	79.602	60.7814
FBgn0031066	COX6B	1411.82	-0.302455	0.345765	-0.874742	0.381714	0.746952	1149.05	1250.37	1264.95	684.239	1199.71	974.593
FBgn0002932	neur	110.948	0.303521	0.348438	0.87109	0.383705	0.750017	105.176	98.5575	114.071	135.626	101.867	124.849
FBgn0020370	TppII	152.074	0.260997	0.299579	0.871213	0.383638	0.750017	126.211	170.991	152.471	207.105	148.601	179.788
FBgn0030243	CG2186	156.2	0.279678	0.321285	0.870497	0.384029	0.750235	118.323	135.368	153.601	156.398	126.846	154.999
FBgn0259108	futsch	239.121	-0.389032	0.447114	-0.870096	0.384248	0.750249	212.981	283.798	140.048	239.484	248.39	189.766
FBgn0025809	Paf-AHalpha	196.334	0.263081	0.302949	0.8684	0.385175	0.751644	155.135	193.553	216.848	205.883	174.344	211.365
FBgn0040890	ksh	72.6832	-0.448185	0.516347	-0.867992	0.385399	0.751665	118.323	58.1845	81.318	46.4305	88.2538	63.8743
FBgn0000662	fl(2)d	153.338	0.270087	0.311623	0.866711	0.3861	0.751746	118.323	121.119	131.012	157.008	119.721	144.01
FBgn0013750	Arf51F	194.73	0.286817	0.330979	0.866573	0.386176	0.751746	131.47	180.491	221.366	165.561	155.98	193.464
FBgn0019661	lncRNA:roX1	1154.24	0.885432	1.02201	0.866365	0.38629	0.751746	736.232	738.587	732.992	1991.01	737.41	1362
FBgn0261268	Cul3	240.486	0.282538	0.325769	0.867296	0.38578	0.751746	163.023	173.366	178.448	230.32	168.194	204.384
FBgn0040793	CG7630	771.406	0.339958	0.392851	0.865361	0.386841	0.752404	360.228	444.102	702.497	320.737	402.165	511.617
FBgn0001978	stc	68.1187	0.425373	0.493079	0.862688	0.388309	0.753727	26.294	77.1836	82.4474	64.1474	51.7388	73.2974
FBgn0010909	msn	552.894	-0.176372	0.205022	-0.860259	0.389647	0.753727	473.292	603.219	486.779	473.469	538.256	480.124
FBgn0027338	Kap-alpha3	559.428	0.215874	0.251079	0.859785	0.389907	0.753727	481.18	452.414	601.979	482.633	466.797	542.306
FBgn0027378	MRG15	65.5454	-0.508905	0.590827	-0.861342	0.389049	0.753727	126.211	60.5594	64.3768	64.7584	93.3853	64.5676
FBgn0029969	CG10932	138.792	0.451345	0.524248	0.860936	0.389273	0.753727	47.3292	73.6212	108.424	61.0928	60.4752	84.7584
FBgn0032198	eEF1delta	524.878	0.242462	0.282123	0.85942	0.390109	0.753727	389.151	422.728	555.673	408.711	405.94	482.192
FBgn0033235	CG8728	238.705	-0.39592	0.459425	-0.861772	0.388813	0.753727	228.758	172.179	153.601	149.677	200.468	151.639
FBgn0037549	CG7878	108.04	-0.364661	0.422812	-0.862468	0.38843	0.753727	126.211	115.182	79.0592	106.912	120.696	92.9858
FBgn0039690	Gnpnat	63.9833	0.362884	0.42204	0.859835	0.38988	0.753727	34.1822	61.7468	60.9885	67.2021	47.9645	64.0953
FBgn0040285	Scamp	211.852	0.243837	0.282673	0.862612	0.388351	0.753727	189.317	219.676	220.236	265.754	204.497	242.995
FBgn0259722	CG42376	70.4512	0.43821	0.509184	0.860611	0.389452	0.753727	28.9234	39.1855	68.8944	27.4918	34.0545	48.1931
FBgn0261609	eIF2alpha	288.68	0.289813	0.33735	0.859087	0.390293	0.753727	191.946	238.675	272.19	257.812	215.311	265.001
FBgn0261789	SmD2	262.826	-0.297126	0.345508	-0.85997	0.389805	0.753727	307.64	365.731	345.602	206.494	336.686	276.048
FBgn0004364	18w	88.7387	0.519982	0.605878	0.858229	0.390766	0.75423	107.805	40.3729	58.7297	147.234	74.0892	102.982
FBgn0027492	wdb	731.201	-0.211422	0.246807	-0.856632	0.391649	0.755521	662.609	805.084	598.591	672.021	733.846	635.306
FBgn0034982	Naa35	154.566	-0.366542	0.428569	-0.855269	0.392402	0.755835	157.764	205.427	147.954	135.626	181.596	141.79
FBgn0038461	CG3678	102.615	0.365149	0.426827	0.855497	0.392276	0.755835	60.4762	84.3082	115.201	75.7551	72.3922	95.4778
FBgn0086856	CG11555	65.4049	0.380872	0.445372	0.855178	0.392453	0.755835	28.9234	41.5604	55.3414	40.3212	35.2419	47.8313
FBgn0001089	Gal	177.513	0.416976	0.488885	0.852912	0.393708	0.756065	165.652	172.179	213.46	237.651	168.915	225.555
FBgn0004369	Ptp99A	254.978	-0.245399	0.289276	-0.848322	0.396259	0.756065	212.981	184.053	166.024	166.783	198.517	166.404
FBgn0004893	bowl	95.7832	0.582029	0.68339	0.851679	0.394392	0.756065	89.3996	90.2454	40.659	226.654	89.8225	133.657
FBgn0015399	kek1	136.409	0.641143	0.756846	0.847124	0.396926	0.756065	155.135	93.8077	145.695	240.095	124.471	192.895
FBgn0016685	Nlp	811.283	-0.207774	0.243133	-0.854569	0.39279	0.756065	975.508	938.077	923.863	734.335	956.792	829.099
FBgn0019972	Drice	97.4738	0.280001	0.330105	0.848219	0.396316	0.756065	81.5114	122.306	109.553	142.346	101.909	125.95
FBgn0027549	Nulp1	77.4748	-0.277271	0.327629	-0.846295	0.397388	0.756065	102.547	75.9961	81.318	64.1474	89.2714	72.7327
FBgn0030041	CG12116	107.656	0.442488	0.523899	0.844607	0.39833	0.756065	136.729	112.807	252.989	86.7518	124.768	169.871
FBgn0032643	GCS2beta	67.3164	-0.515157	0.60687	-0.848876	0.395951	0.756065	118.323	54.6222	19.2001	97.7485	86.4726	58.4743
FBgn0032690	CG10333	68.1459	-0.411689	0.486854	-0.845611	0.39777	0.756065	73.6232	86.6831	70.0239	51.9289	80.1531	60.9764
FBgn0032732	CG15168	69.0772	0.349951	0.412516	0.848333	0.396252	0.756065	47.3292	60.5594	85.8357	55.5944	53.9443	70.7151
FBgn0033485	RpLP0-like	88.4845	0.394992	0.464779	0.849849	0.395409	0.756065	78.882	41.5604	89.2239	64.7584	60.2212	76.9912
FBgn0034420	CG10737	493.901	-0.386671	0.45687	-0.846348	0.397358	0.756065	378.634	499.912	408.849	265.754	439.273	337.301
FBgn0035586	Fitm	66.3131	-0.456215	0.536815	-0.849855	0.395406	0.756065	81.5114	70.0589	49.6943	59.8709	75.7852	54.7826
FBgn0035798	frac	249.335	-0.545996	0.639746	-0.853458	0.393406	0.756065	147.246	216.114	138.918	111.189	181.68	125.054
FBgn0036740	Vps60	106.978	0.393852	0.462992	0.850666	0.394955	0.756065	81.5114	99.7449	145.695	95.3048	90.6282	120.5
FBgn0038984	AdipoR	268.952	-0.264734	0.311365	-0.850237	0.395193	0.756065	236.646	324.171	216.848	252.924	280.409	234.886
FBgn0039265	CG11790	108.576	0.358095	0.423071	0.846418	0.397319	0.756065	99.9172	109.244	114.071	153.954	104.581	134.012
FBgn0040666	CG12848	91.0593	-0.452905	0.534021	-0.848104	0.39638	0.756065	65.735	121.119	94.871	45.2087	93.4269	70.0398
FBgn0085450	Snoo	210.913	0.288052	0.339118	0.849415	0.395651	0.756065	163.023	191.178	237.178	198.552	177.1	217.865
FBgn0087013	Karybeta3	246.15	-0.185403	0.219444	-0.844875	0.39818	0.756065	299.752	265.986	231.53	261.477	282.869	246.504
FBgn0260639	gammaTub23C	102.439	-0.388479	0.459966	-0.84458	0.398345	0.756065	191.946	117.556	138.918	95.9157	154.751	117.417
FBgn0261618	larp	858.981	-0.236751	0.279409	-0.847329	0.396812	0.756065	878.22	1002.2	782.686	814.978	940.209	798.832
FBgn0266186	Vamp7	121.66	0.434531	0.513703	0.84588	0.397619	0.756065	147.246	87.8705	168.283	146.012	117.558	157.147
FBgn0266377	Pde8	73.5196	-0.371721	0.43598	-0.85261	0.393875	0.756065	65.735	80.7459	60.9885	53.7617	73.2404	57.3751
FBgn0266570	NO66	64.4515	0.402702	0.476062	0.845904	0.397607	0.756065	31.5528	55.8096	67.765	52.5398	43.6812	60.1524
FBgn0267972	Der-1	136.197	0.233629	0.274738	0.850371	0.395119	0.756065	139.358	128.243	145.695	166.172	133.801	155.934
FBgn0033555	RpS15Ab	263.054	0.241762	0.286402	0.844137	0.398593	0.756129	252.422	217.301	317.366	237.04	234.862	277.203
FBgn0029785	RpL35	3986.92	0.256256	0.304142	0.842553	0.399478	0.756677	2989.63	3393.7	4824.87	2804.77	3191.67	3814.82
FBgn0031021	ND-18	389.768	0.292316	0.347024	0.842351	0.399592	0.756677	194.576	249.362	329.79	219.323	221.969	274.556
FBgn0032223	GATAd	97.9811	0.31947	0.379444	0.841942	0.399821	0.756677	60.4762	103.307	96.0004	113.633	81.8917	104.817
FBgn0038771	CG4390	331.069	-0.225341	0.267824	-0.841376	0.400138	0.756677	420.704	368.106	376.096	298.133	394.405	337.114
FBgn0052267	CG32267	177.673	0.378891	0.450043	0.8419	0.399844	0.756677	136.729	134.181	257.507	97.1375	135.455	177.322
FBgn0262614	pyd	372.859	-0.318729	0.378842	-0.841325	0.400166	0.756677	273.458	327.733	167.154	314.017	300.595	240.585
FBgn0020762	Atet	64.8586	-0.457706	0.544509	-0.840584	0.400581	0.756889	105.176	93.8077	57.6003	86.1408	99.4919	71.8706
FBgn0036576	CG5151	71.9058	-0.489369	0.582861	-0.839597	0.401134	0.756889	94.6584	73.6212	50.8238	67.813	84.1398	59.3184
FBgn0250868	CG42239	69.9348	0.399771	0.4758	0.840208	0.400792	0.756889	63.1056	64.1217	96.0004	72.7004	63.6137	84.3504
FBgn0263413	lncRNA:CR43459	77.4315	-0.484196	0.576671	-0.83964	0.40111	0.756889	70.9938	94.9951	70.0239	50.0961	82.9945	60.06
FBgn0036549	CG10516	194.793	-0.335685	0.400466	-0.838235	0.401899	0.757759	241.905	151.992	168.283	141.124	196.949	154.704
FBgn0039877	Mccc1	64.2261	-0.438632	0.523419	-0.838013	0.402024	0.757759	57.8468	65.3092	36.1413	54.3726	61.578	45.257
FBgn0003360	sesB	3032.43	-0.228244	0.272737	-0.836864	0.402669	0.758167	2663.58	2892.6	2726.41	2020.34	2778.09	2373.38
FBgn0037671	ATP6AP2	112.465	-0.268971	0.321371	-0.836947	0.402623	0.758167	163.023	117.556	141.177	90.4173	140.29	115.797
FBgn0004595	pros	494.547	-1.09516	1.30926	-0.836471	0.40289	0.758179	368.116	237.488	108.424	174.725	302.802	141.575
FBgn0023170	RpL39	1819.38	0.344106	0.411609	0.836001	0.403154	0.758273	1525.05	1499.74	2703.82	1138.16	1512.39	1920.99
FBgn0010411	RpS18	9535.94	0.192934	0.230957	0.835367	0.403511	0.758541	8669.13	8161.27	11785.5	7455.76	8415.2	9620.62
FBgn0000546	EcR	432.452	-0.241766	0.289714	-0.8345	0.404	0.758652	449.628	508.224	382.872	428.26	478.926	405.566
FBgn0032195	CG4908	64.4477	-0.438595	0.525541	-0.834559	0.403966	0.758652	39.441	64.1217	38.4002	39.7103	51.7814	39.0552
FBgn0033179	p47	147.998	-0.29667	0.355853	-0.833685	0.404458	0.758862	155.135	203.052	146.824	147.234	179.093	147.029
FBgn0086371	poly	125.046	0.361767	0.434013	0.83354	0.40454	0.758862	81.5114	121.119	185.224	81.2534	101.315	133.239
FBgn0037700	CG8149	166.698	-0.282962	0.339647	-0.833108	0.404784	0.758916	210.352	212.552	225.883	124.629	211.452	175.256
FBgn0015803	RtGEF	75.3493	-0.390784	0.469762	-0.831875	0.40548	0.759525	49.9586	104.495	58.7297	62.3146	77.2266	60.5222
FBgn0037007	CG5059	366.35	0.313576	0.376998	0.831771	0.405538	0.759525	283.975	454.789	484.52	439.868	369.382	462.194
FBgn0003449	snf	152.04	-0.325962	0.392605	-0.830254	0.406395	0.759804	218.24	140.118	171.671	112.411	179.179	142.041
FBgn0051781	lncRNA:CR31781	1101.4	-0.391906	0.472036	-0.830247	0.406399	0.759804	1075.42	1527.05	1102.31	883.402	1301.24	992.856
FBgn0261872	scaf6	76.047	-0.321574	0.387445	-0.829986	0.406546	0.759804	78.882	79.5584	47.4355	77.5878	79.2202	62.5117
FBgn0267330	KdelR	197.822	0.28526	0.343543	0.830348	0.406342	0.759804	186.687	180.491	186.354	259.033	183.589	222.694
FBgn0026313	X11L	206.526	0.289453	0.3491	0.82914	0.407025	0.76025	141.988	249.362	196.519	287.747	195.675	242.133
FBgn0038462	CG17556	82.9575	0.395147	0.476768	0.828804	0.407215	0.76025	73.6232	79.5584	127.624	75.7551	76.5908	101.69
FBgn0031639	mRpS2	214.537	-0.310674	0.375109	-0.828223	0.407544	0.760462	197.205	160.304	169.413	118.52	178.755	143.966
FBgn0000071	Ama	205.994	0.384577	0.466276	0.824785	0.409494	0.761571	239.275	198.302	361.413	209.548	218.789	285.481
FBgn0000658	fj	123.065	-0.434202	0.525673	-0.825991	0.408809	0.761571	234.017	161.492	59.8591	229.098	197.754	144.479
FBgn0032726	CG10621	295.186	0.458843	0.556755	0.824137	0.409862	0.761571	289.234	301.61	378.355	433.759	295.422	406.057
FBgn0033528	trsn	79.7522	0.369648	0.448406	0.82436	0.409735	0.761571	86.7702	45.1227	75.6709	88.5845	65.9465	82.1277
FBgn0035520	CG11586	82.8079	-0.398588	0.48272	-0.825714	0.408966	0.761571	97.2878	87.8705	105.036	37.2666	92.5792	71.1512
FBgn0036317	CG10948	67.8918	0.361224	0.437898	0.824905	0.409426	0.761571	31.5528	73.6212	60.9885	80.0316	52.587	70.51
FBgn0036551	CG17029	68.2981	-0.47555	0.57535	-0.826539	0.408498	0.761571	65.735	159.117	117.459	48.2633	112.426	82.8613
FBgn0052528	parvin	121.678	-0.313767	0.380543	-0.824526	0.409641	0.761571	136.729	176.928	151.342	104.469	156.829	127.905
FBgn0027524	CG3909	85.1795	-0.355857	0.432632	-0.82254	0.41077	0.761908	149.876	67.684	103.906	62.9256	108.78	83.416
FBgn0029665	CG14270	74.7782	0.423986	0.515526	0.822434	0.41083	0.761908	28.9234	49.8725	84.7063	26.8808	39.3979	55.7936
FBgn0034182	SmydA-7	352.457	-0.517777	0.629532	-0.822478	0.410805	0.761908	257.681	345.545	274.448	148.455	301.613	211.452
FBgn0266719	stac	168.417	0.398478	0.484588	0.822303	0.410904	0.761908	15.7764	61.7468	51.9532	58.0381	38.7616	54.9957
FBgn0015664	Dref	63.9273	0.309832	0.37697	0.821901	0.411133	0.761932	57.8468	68.8715	59.8591	97.1375	63.3592	78.4983
FBgn0037877	CG6689	119.894	-0.379859	0.462637	-0.821074	0.411604	0.762405	128.841	98.5575	93.7416	80.0316	113.699	86.8866
FBgn0030484	GstT4	73.6964	0.331318	0.40475	0.818573	0.41303	0.764646	120.952	67.684	107.295	123.407	94.3182	115.351
FBgn0004921	Ggamma1	1713.04	-0.196986	0.240825	-0.817964	0.413378	0.76489	2647.81	1905.84	2304.01	1664.17	2276.82	1984.09
FBgn0052243	CG32243	100.509	0.388242	0.474883	0.817553	0.413612	0.764923	126.211	89.058	149.083	130.128	107.635	139.605
FBgn0013272	Gp150	198.214	0.469648	0.575289	0.816369	0.414289	0.764974	197.205	143.68	114.071	354.338	170.443	234.205
FBgn0021944	Coprox	141.436	0.331048	0.405488	0.81642	0.41426	0.764974	55.2174	68.8715	80.1886	78.1988	62.0444	79.1937
FBgn0264001	bru3	141.751	-0.792389	0.970553	-0.81643	0.414254	0.764974	144.617	52.2473	37.2708	75.1441	98.4322	56.2074
FBgn0033918	CG8531	165.766	-0.311606	0.381889	-0.815959	0.414524	0.765009	107.805	178.116	137.789	97.7485	142.961	117.769
FBgn0031996	CG8460	71.7919	-0.400096	0.492174	-0.812915	0.416267	0.767824	99.9172	70.0589	48.5649	77.5878	84.9881	63.0764
FBgn0029958	Pdp	161.947	-0.287699	0.354889	-0.810672	0.417554	0.76897	139.358	198.302	170.542	111.189	168.83	140.865
FBgn0053113	Rtnl1	2283.17	0.223648	0.276	0.810317	0.417758	0.76897	1030.73	1300.25	1426.45	1301.28	1165.49	1363.87
FBgn0260944	Rbp1	343.083	0.178318	0.219835	0.811145	0.417282	0.76897	299.752	321.796	405.461	303.631	310.774	354.546
FBgn0260945	Atg1	199.421	-0.266984	0.329297	-0.81077	0.417498	0.76897	139.358	258.862	160.377	176.558	199.11	168.468
FBgn0015791	Rab14	134.171	0.246493	0.305299	0.807383	0.419446	0.770789	123.582	109.244	129.883	143.568	116.413	136.726
FBgn0027095	Manf	155.844	0.319272	0.395805	0.806641	0.419874	0.770789	141.988	148.43	185.224	177.78	145.209	181.502
FBgn0031883	Caper	114.744	-0.352569	0.436899	-0.806981	0.419677	0.770789	160.393	123.494	105.036	115.465	141.944	110.251
FBgn0037569	tex	64.666	0.37568	0.46557	0.806924	0.41971	0.770789	55.2174	48.685	63.2474	70.2567	51.9512	66.752
FBgn0051635	CG31635	74.2832	-0.393926	0.488543	-0.806328	0.420054	0.770789	42.0704	84.3082	42.9178	55.5944	63.1893	49.2561
FBgn0066084	RpL41	5811.98	0.333663	0.413092	0.80772	0.419252	0.770789	4874.91	4613.2	8669.41	3289.85	4744.06	5979.63
FBgn0086361	alph	318.654	0.199372	0.247716	0.80484	0.420912	0.771963	312.899	254.112	323.013	322.57	283.505	322.792
FBgn0025639	Hmt4-20	81.519	-0.261251	0.324908	-0.804077	0.421352	0.77237	139.358	104.495	99.3887	100.803	121.926	100.096
FBgn0038923	mRpL35	194.93	-0.348331	0.433909	-0.802775	0.422105	0.773349	134.099	195.927	186.354	77.5878	165.013	131.971
FBgn0001218	Hsc70-3	1294.08	-0.186818	0.233528	-0.799982	0.423721	0.773646	1622.34	1364.37	1166.69	1450.95	1493.35	1308.82
FBgn0001234	lncRNA:Hsromega	3445.06	-0.322976	0.403987	-0.79947	0.424018	0.773646	2185.03	3052.91	2075.87	2113.81	2618.97	2094.84
FBgn0033810	CG4646	112.88	0.381355	0.476975	0.799528	0.423984	0.773646	105.176	74.8087	151.342	81.8643	89.9924	116.603
FBgn0051908	CG31908	86.4993	-0.296267	0.369365	-0.802099	0.422496	0.773646	105.176	112.807	55.3414	119.742	108.991	87.5417
FBgn0086605	CG9853	91.8025	-0.332032	0.414804	-0.800454	0.423448	0.773646	113.064	81.9333	67.765	84.308	97.4988	76.0365
FBgn0086706	pix	488.344	0.223534	0.279439	0.799941	0.423745	0.773646	404.928	497.537	507.108	550.446	451.232	528.777
FBgn0039830	ATPsynC	9842.52	-0.249617	0.312981	-0.797546	0.425134	0.775283	6321.08	7016.58	6886.06	4336.37	6668.83	5611.21
FBgn0034893	mRpL43	111.072	0.326524	0.410115	0.796176	0.42593	0.776334	89.3996	46.3101	93.7416	70.8676	67.8549	82.3046
FBgn0004101	bs	114.597	-0.365792	0.459707	-0.795706	0.426203	0.776431	115.694	140.118	67.765	130.128	127.906	98.9463
FBgn0038805	TFAM	324.813	0.299397	0.376559	0.795087	0.426563	0.776687	176.17	307.547	359.155	244.371	241.858	301.763
FBgn0001253	ImpE1	109.895	-0.655712	0.825991	-0.793849	0.427283	0.777199	118.323	41.5604	30.4943	69.0349	79.9417	49.7646
FBgn0259170	alpha-Man-Ia	64.8137	-0.459471	0.578653	-0.794036	0.427175	0.777199	28.9234	81.9333	40.659	42.765	55.4284	41.712
FBgn0038389	CG5516	123.071	-0.277857	0.350792	-0.792085	0.428311	0.778667	123.582	135.368	135.53	81.2534	129.475	108.392
FBgn0014026	RpL7A	6010.83	-0.189693	0.239679	-0.791447	0.428683	0.778943	5708.43	6194.87	5843.6	4597.23	5951.65	5220.42
FBgn0013746	alien	155.083	0.219934	0.278403	0.789984	0.429537	0.780094	178.799	134.181	208.942	152.121	156.49	180.532
FBgn0000043	Act42A	1101.97	0.47191	0.597678	0.789573	0.429777	0.78013	1241.08	951.139	1002.92	2035	1096.11	1518.96
FBgn0011824	CG4038	99.6112	-0.428509	0.543664	-0.788187	0.430587	0.781199	44.6998	49.8725	40.659	30.5464	47.2861	35.6027
FBgn0029959	Rab39	169.587	-0.275494	0.349802	-0.787571	0.430948	0.781452	89.3996	119.931	83.5769	91.6392	104.666	87.608
FBgn0032242	CG5355	417.422	0.178589	0.227125	0.786302	0.431691	0.781997	318.158	374.043	402.072	386.717	346.1	394.395
FBgn0262115	CG17683	118.979	0.250457	0.318447	0.786497	0.431577	0.781997	113.064	75.9961	107.295	111.189	94.5302	109.242
FBgn0001090	bnb	6758.94	0.52975	0.674569	0.785316	0.432268	0.782643	8421.97	7597.24	3995.88	19128.8	8009.6	11562.3
FBgn0260858	Ykt6	76.9754	-0.31033	0.395503	-0.784647	0.432661	0.782952	128.841	91.4328	93.7416	81.8643	110.137	87.803
FBgn0029833	MCTS1	178.687	0.305589	0.389933	0.783697	0.433218	0.78356	149.876	180.491	271.06	141.735	165.183	206.398
FBgn0085397	Fili	139.747	0.463068	0.591972	0.782248	0.434069	0.784194	126.211	192.365	180.707	260.255	159.288	220.481
FBgn0262955	RpII140	149.272	0.229477	0.293461	0.781967	0.434234	0.784194	155.135	144.868	159.248	189.999	150.001	174.623
FBgn0266449	Kr-h2	137.839	0.312341	0.399338	0.782146	0.434129	0.784194	102.547	115.182	123.106	147.845	108.864	135.476
FBgn0263911	COX8	856.904	0.38864	0.497363	0.781401	0.434567	0.784394	404.928	453.602	838.027	288.969	429.265	563.498
FBgn0010014	CanB	65.3319	-0.985197	1.26205	-0.78063	0.43502	0.784412	97.2878	30.8734	29.3648	34.8229	64.0806	32.0939
FBgn0053193	sav	78.9644	-0.364452	0.46667	-0.780963	0.434824	0.784412	123.582	81.9333	81.318	76.366	102.758	78.842
FBgn0035593	CG4603	129.908	-0.385757	0.496389	-0.777127	0.437084	0.787343	149.876	195.927	180.707	86.7518	172.902	133.729
FBgn0052813	CG32813	269.27	-0.376748	0.484804	-0.777114	0.437091	0.787343	381.263	300.422	344.472	180.835	340.843	262.653
FBgn0032388	CG6686	87.9146	-0.297238	0.383173	-0.775728	0.43791	0.788416	76.2526	128.243	70.0239	98.9703	102.248	84.4971
FBgn0002564	Lsp1gamma	2737.64	0.305906	0.395381	0.7737	0.439108	0.789995	3339.34	2953.16	4850.85	2928.18	3146.25	3889.51
FBgn0027945	ppl	253.594	-0.352091	0.455199	-0.773488	0.439234	0.789995	286.605	222.051	297.037	102.636	254.328	199.836
FBgn0037360	CG2182	96.1623	0.319077	0.412799	0.77296	0.439546	0.790155	57.8468	84.3082	89.2239	91.6392	71.0775	90.4316
FBgn0026324	Taf10b	81.0771	0.36266	0.469586	0.772299	0.439937	0.790457	47.3292	64.1217	80.1886	65.9802	55.7255	73.0844
FBgn0015600	toc	83.4006	-0.465096	0.603407	-0.770783	0.440836	0.790639	68.3644	41.5604	22.5883	54.3726	54.9624	38.4805
FBgn0029002	miple2	234.046	0.353603	0.458754	0.770792	0.44083	0.790639	244.534	223.239	212.33	383.052	233.886	297.691
FBgn0036848	Naxd	82.1231	0.33651	0.436382	0.771137	0.440626	0.790639	86.7702	71.2464	120.848	78.1988	79.0083	99.5232
FBgn0085478	Zdhhc8	115.834	-0.33736	0.437778	-0.770618	0.440933	0.790639	126.211	106.87	67.765	114.244	116.54	91.0043
FBgn0015359	CG2034	195.126	0.325272	0.422337	0.770171	0.441198	0.790713	99.9172	148.43	184.095	131.96	124.174	158.028
FBgn0000228	Bsg25D	75.4881	-0.33877	0.440447	-0.769152	0.441803	0.791056	152.505	93.8077	96.0004	95.9157	123.156	95.9581
FBgn0015221	Fer2LCH	702.786	-0.26849	0.349099	-0.769095	0.441837	0.791056	823.002	761.149	641.509	672.632	792.076	657.07
FBgn0039406	RpL34a	935.708	0.215419	0.280396	0.768268	0.442328	0.791534	728.344	789.647	1107.96	659.802	758.996	883.88
FBgn0034315	CG5721	176.746	0.286436	0.373034	0.767855	0.442573	0.791573	163.023	185.241	231.53	195.497	174.132	213.514
FBgn0033638	CG9005	76.8407	0.326988	0.426277	0.767079	0.443035	0.791997	84.1408	75.9961	84.7063	114.244	80.0685	99.4749
FBgn0003464	sol	89.163	-0.39855	0.52036	-0.765912	0.443729	0.792028	152.505	112.807	85.8357	113.633	132.656	99.7341
FBgn0010516	wal	475.155	-0.201332	0.263219	-0.764884	0.444341	0.792028	515.363	546.222	530.826	395.881	530.792	463.354
FBgn0031505	ND-B14.5B	337.42	0.344437	0.450311	0.764886	0.444339	0.792028	120.952	249.362	327.531	150.899	185.157	239.215
FBgn0039359	RpL27	6533.04	0.20291	0.265314	0.764791	0.444396	0.792028	5056.34	5542.97	7559.19	4646.72	5299.65	6102.95
FBgn0250837	dUTPase	224.846	0.282454	0.368596	0.766299	0.443499	0.792028	320.787	268.361	474.355	242.538	294.574	358.447
FBgn0260943	Rbp6	793.453	-0.453156	0.591802	-0.765722	0.443842	0.792028	483.81	574.721	194.26	577.938	529.265	386.099
FBgn0003139	PpV	120.654	0.245683	0.322028	0.762923	0.44551	0.792648	113.064	124.681	123.106	158.841	118.873	140.974
FBgn0025682	scf	180.869	0.331989	0.435066	0.763078	0.445417	0.792648	123.582	218.489	197.648	237.651	171.035	217.649
FBgn0031492	CG3542	89.2835	-0.253391	0.33239	-0.762328	0.445864	0.792648	89.3996	115.182	81.318	92.2501	102.291	86.7841
FBgn0037094	CG7611	164.015	-0.208755	0.273545	-0.763147	0.445376	0.792648	194.576	208.989	171.671	178.391	201.782	175.031
FBgn0039303	CG11857	90.4697	0.272643	0.357612	0.762398	0.445822	0.792648	55.2174	70.0589	59.8591	92.2501	62.6382	76.0546
FBgn0022942	Cbp80	173.79	-0.225511	0.296354	-0.760951	0.446686	0.793311	197.205	191.178	164.895	166.783	194.191	165.839
FBgn0033571	Rpb5	130.285	0.287631	0.377967	0.760996	0.44666	0.793311	97.2878	84.3082	126.495	94.6938	90.798	110.594
FBgn0032456	MRP	159.664	-0.272674	0.358836	-0.759886	0.447323	0.793952	120.952	134.181	77.9298	131.96	127.567	104.945
FBgn0039532	Mtl	106.971	0.287845	0.378945	0.759595	0.447496	0.793952	76.2526	113.994	141.177	97.1375	95.1234	119.157
FBgn0030753	rngo	72.5024	-0.315166	0.415326	-0.75884	0.447948	0.794356	73.6232	108.057	63.2474	84.308	90.8401	73.7777
FBgn0029082	hbs	155.717	-0.298321	0.393843	-0.75746	0.448774	0.795421	305.01	172.179	105.036	275.528	238.595	190.282
FBgn0000382	csw	284.216	0.203564	0.269228	0.756101	0.449588	0.795916	202.464	208.989	239.436	235.207	205.727	237.322
FBgn0014380	RhoL	100.354	0.360682	0.477176	0.755868	0.449729	0.795916	107.805	102.12	152.471	117.298	104.963	134.885
FBgn0031090	Rab35	84.2442	0.329204	0.435231	0.75639	0.449416	0.795916	55.2174	93.8077	105.036	87.3627	74.5126	96.1992
FBgn0004103	Pp1-87B	866.552	-0.167271	0.222018	-0.753411	0.451203	0.796895	1075.42	1003.39	953.228	896.842	1039.41	925.035
FBgn0005427	ewg	167.202	-0.308808	0.410005	-0.753181	0.451341	0.796895	199.834	176.928	93.7416	207.105	188.381	150.423
FBgn0032518	RpL24	7112.49	-0.181073	0.239997	-0.75448	0.450561	0.796895	7075.72	7412	7219.23	5563.11	7243.86	6391.17
FBgn0044324	Chro	141.79	-0.239576	0.318081	-0.753192	0.451335	0.796895	189.317	188.803	108.424	208.326	189.06	158.375
FBgn0261477	slim	153.104	-0.22911	0.304236	-0.753068	0.451409	0.796895	202.464	135.368	129.883	152.121	168.916	141.002
FBgn0011259	Sema1a	321.474	0.298501	0.396769	0.752331	0.451852	0.79728	152.505	295.672	220.236	336.621	224.089	278.429
FBgn0034230	CG4853	106.716	-0.302244	0.402538	-0.750846	0.452745	0.79806	155.135	103.307	102.777	103.858	129.221	103.317
FBgn0037220	CG14641	112.81	-0.245743	0.327196	-0.751059	0.452617	0.79806	168.282	100.932	131.012	92.2501	134.607	111.631
[truncated: 12,472 more rows]

## Sheet: 24h-Slmap-IR-sig
ensembl_gene_id	external_gene_name	baseMean	log2FoldChange	lfcSE	stat	pvalue	padj	wild type 24h_1	wild type 24h_2	Slmap-IR 24h_1	Slmap-IR 24h_2	Slmap-IR 24h_3	Mean24h wild type	Mean24h Slmap-IR
FBgn0030364	Lsm12a	465.213	-1.42789	0.205216	-6.95799	3.45167e-12	2.86937e-08	1248.97	822.895	370.769	350.893	452.596	1035.93	391.419
FBgn0034659	CG4021	6.66144	-17.4836	3.07673	-5.68251	1.32731e-08	5.51695e-05	2.6294	0	0	0	0	1.3147	0
FBgn0003149	Prm	1110.03	-2.19659	0.412701	-5.32248	1.02363e-07	0.000281756	168.282	170.991	14.8307	53.9836	40.6176	169.636	36.4773
FBgn0038595	CG7142	292.956	-1.83731	0.34856	-5.27115	1.35574e-07	0.000281756	365.487	314.671	85.8064	82.9033	133.458	340.079	100.723
FBgn0036697	rogdi	80.3862	2.76283	0.557489	4.95584	7.20197e-07	0.000997832	10.5176	28.4985	238.351	78.6618	104.445	19.5081	140.486
FBgn0000046	Act87E	1205.79	-1.26299	0.270224	-4.67386	2.95592e-06	0.00351036	1887.91	1466.49	456.575	827.877	823.957	1677.2	702.803
FBgn0033191	CG1598	132.431	-1.18626	0.263469	-4.50246	6.71704e-06	0.00507625	205.093	192.365	91.1031	77.8906	104.445	198.729	91.1463
FBgn0033234	MFS12	70.9879	2.08864	0.459666	4.54382	5.52446e-06	0.00507625	52.588	30.8734	269.072	97.556	145.063	41.7307	170.564
FBgn0029761	SK	1292.66	-1.80789	0.403477	-4.48078	7.43708e-06	0.00515204	988.655	1435.61	328.395	487.009	203.088	1212.13	339.497
FBgn0053124	CG33124	9.84457	-6.35039	1.43761	-4.41733	9.99268e-06	0.00601408	44.6998	24.9362	0	0.385597	0	34.818	0.128532
FBgn0046247	CG5938	87.8903	1.52699	0.345909	4.41441	1.01284e-05	0.00601408	39.441	54.6222	134.536	141.128	145.063	47.0316	140.242
FBgn0267534	asRNA:CR45874	92.11	-2.03994	0.464713	-4.38967	1.13523e-05	0.00629144	291.863	134.181	46.6109	57.8395	46.4201	213.022	50.2902
FBgn0052109	CG32109	52.9349	3.21103	0.735924	4.36326	1.28139e-05	0.00665762	7.8882	9.49951	64.6197	47.814	150.865	8.69386	87.7663
FBgn0039178	CG6356	52.6323	1.95622	0.453638	4.3123	1.61562e-05	0.00746146	23.6646	30.8734	132.417	74.4202	127.655	27.269	111.498
FBgn0052056	scramb1	52.7139	2.36705	0.552341	4.28548	1.82343e-05	0.00797798	15.7764	11.8744	49.7889	67.0939	104.445	13.8254	73.776
FBgn0032715	CG17597	38.954	2.62716	0.617169	4.25679	2.07381e-05	0.00861978	18.4058	14.2493	108.053	38.9453	168.273	16.3275	105.09
FBgn0037876	CG4820	29.1344	-1.87691	0.447427	-4.19489	2.73001e-05	0.0103157	105.176	53.4348	26.4835	16.1951	23.21	79.3054	21.9629
FBgn0041710	yellow-f	76.5842	2.10992	0.504843	4.17937	2.92321e-05	0.0105655	31.5528	43.9353	216.105	88.6873	203.088	37.744	169.293
FBgn0029873	CG3918	75.4194	-1.19422	0.287318	-4.15645	3.23228e-05	0.0111958	118.323	147.242	49.7889	60.9243	75.4326	132.783	62.0486
FBgn0283535	Vha26	431.823	1.07917	0.267171	4.03925	5.36234e-05	0.0153714	299.752	268.361	689.629	481.996	632.474	284.056	601.366
FBgn0020513	Paics	189.018	1.21689	0.300036	4.0558	4.99621e-05	0.0153714	120.952	135.368	349.582	234.443	324.941	128.16	302.988
FBgn0030519	CG11151	337.354	1.6645	0.411776	4.04225	5.29411e-05	0.0153714	102.547	197.115	694.926	283.028	470.003	149.831	482.653
FBgn0031220	CG4822	103.689	1.7917	0.450325	3.97867	6.93009e-05	0.0185838	31.5528	35.6232	123.943	101.026	133.458	33.588	119.476
FBgn0267861	Maf1	282.521	1.3572	0.342241	3.96563	7.32031e-05	0.0190168	86.7702	156.742	318.861	306.164	336.546	121.756	320.524
FBgn0265413	CG44325	115.052	1.93109	0.488344	3.95437	7.67371e-05	0.0193308	39.441	52.2473	245.767	91.0009	203.088	45.8442	179.952
FBgn0031907	CG5171	236.869	1.33248	0.338425	3.93731	8.23996e-05	0.0201467	136.729	156.742	476.702	259.892	382.966	146.735	373.187
FBgn0266918	CG32486	397.744	-1.18348	0.30285	-3.9078	9.31413e-05	0.0215079	612.65	596.095	212.927	270.689	330.743	604.372	271.453
FBgn0037624	CG8223	225.128	-1.28831	0.333865	-3.85878	0.000113957	0.0249295	410.187	270.736	144.07	136.116	133.458	340.461	137.881
FBgn0037707	RnpS1	171.501	-1.13564	0.294227	-3.85973	0.000113514	0.0249295	315.528	227.988	82.6284	161.18	116.05	271.758	119.953
FBgn0033341	MrgBP	100.874	-1.27863	0.3328	-3.84203	0.000122023	0.0260096	168.282	144.868	63.5603	75.9626	34.8151	156.575	58.1127
FBgn0086906	sls	2917.1	-1.47917	0.387909	-3.81318	0.000137189	0.0285112	5006.38	5990.63	1502.14	2575.79	1833.59	5498.51	1970.51
FBgn0264075	tgo	91.9455	1.66434	0.439893	3.78351	0.00015463	0.0313522	21.0352	47.4976	121.824	126.476	87.0377	34.2664	111.779
FBgn0053481	dpr7	24.296	7.227	1.93556	3.73379	0.000188619	0.037333	0	0	131.358	10.7967	0	0	47.3849
FBgn0261836	Msp300	4815.79	-1.47613	0.396287	-3.7249	0.000195391	0.0377742	5484.93	5900.39	1189.64	2745.84	2204.95	5692.66	2046.81
FBgn0013726	pnut	263.712	-1.05228	0.28494	-3.69299	0.000221635	0.0418739	473.292	314.671	194.918	194.341	168.273	393.982	185.844
FBgn0032773	fon	1017	1.2102	0.332198	3.643	0.000269476	0.0486989	796.708	872.768	2452.37	1082.76	2280.39	834.738	1938.5
FBgn0030158	CG9686	637.937	1.3385	0.369733	3.62017	0.000294404	0.0489477	226.128	346.732	1087.94	404.491	696.301	286.43	729.578
FBgn0036410	CG8100	29.6543	2.52987	0.69686	3.63038	0.000283005	0.0489477	10.5176	7.12464	68.857	28.1486	52.2226	8.82112	49.7427
FBgn0033017	CG10465	94.4574	1.43621	0.398042	3.60819	0.000308343	0.0492933	36.8116	51.0599	144.07	104.882	116.05	43.9358	121.668

## Sheet: 24h-Slmap-IR-all
ensembl_gene_id	external_gene_name	baseMean	log2FoldChange	lfcSE	stat	pvalue	padj	wild type 24h_1	wild type 24h_2	Slmap-IR 24h_1	Slmap-IR 24h_2	Slmap-IR 24h_3	Mean24h wild type	Mean24h Slmap-IR
FBgn0030364	Lsm12a	465.213	-1.42789	0.205216	-6.95799	3.45167e-12	2.86937e-08	1248.97	822.895	370.769	350.893	452.596	1035.93	391.419
FBgn0034659	CG4021	6.66144	-17.4836	3.07673	-5.68251	1.32731e-08	5.51695e-05	2.6294	0	0	0	0	1.3147	0
FBgn0003149	Prm	1110.03	-2.19659	0.412701	-5.32248	1.02363e-07	0.000281756	168.282	170.991	14.8307	53.9836	40.6176	169.636	36.4773
FBgn0038595	CG7142	292.956	-1.83731	0.34856	-5.27115	1.35574e-07	0.000281756	365.487	314.671	85.8064	82.9033	133.458	340.079	100.723
FBgn0000559	eEF2	5433.61	-0.712422	0.138934	-5.12777	2.932e-07	0.000487475	8703.32	7689.86	4366.59	5343.99	5309.3	8196.59	5006.63
FBgn0036697	rogdi	80.3862	2.76283	0.557489	4.95584	7.20197e-07	0.000997832	10.5176	28.4985	238.351	78.6618	104.445	19.5081	140.486
FBgn0000046	Act87E	1205.79	-1.26299	0.270224	-4.67386	2.95592e-06	0.00351036	1887.91	1466.49	456.575	827.877	823.957	1677.2	702.803
FBgn0028690	Rpn5	504.082	-0.726195	0.160077	-4.53654	5.71837e-06	0.00507625	880.849	694.652	455.516	507.446	435.188	787.751	466.05
FBgn0033191	CG1598	132.431	-1.18626	0.263469	-4.50246	6.71704e-06	0.00507625	205.093	192.365	91.1031	77.8906	104.445	198.729	91.1463
FBgn0033234	MFS12	70.9879	2.08864	0.459666	4.54382	5.52446e-06	0.00507625	52.588	30.8734	269.072	97.556	145.063	41.7307	170.564
FBgn0034237	eIF3b	1855.11	-0.644299	0.142796	-4.51202	6.42137e-06	0.00507625	3044.85	2507.87	1546.63	1779.14	2042.48	2776.36	1789.42
FBgn0029761	SK	1292.66	-1.80789	0.403477	-4.48078	7.43708e-06	0.00515204	988.655	1435.61	328.395	487.009	203.088	1212.13	339.497
FBgn0046247	CG5938	87.8903	1.52699	0.345909	4.41441	1.01284e-05	0.00601408	39.441	54.6222	134.536	141.128	145.063	47.0316	140.242
FBgn0053124	CG33124	9.84457	-6.35039	1.43761	-4.41733	9.99268e-06	0.00601408	44.6998	24.9362	0	0.385597	0	34.818	0.128532
FBgn0267534	asRNA:CR45874	92.11	-2.03994	0.464713	-4.38967	1.13523e-05	0.00629144	291.863	134.181	46.6109	57.8395	46.4201	213.022	50.2902
FBgn0052109	CG32109	52.9349	3.21103	0.735924	4.36326	1.28139e-05	0.00665762	7.8882	9.49951	64.6197	47.814	150.865	8.69386	87.7663
FBgn0015282	Rpt2	461.863	-0.912232	0.211219	-4.31889	1.56817e-05	0.00746146	807.226	561.659	328.395	370.559	394.571	684.442	364.508
FBgn0039178	CG6356	52.6323	1.95622	0.453638	4.3123	1.61562e-05	0.00746146	23.6646	30.8734	132.417	74.4202	127.655	27.269	111.498
FBgn0052056	scramb1	52.7139	2.36705	0.552341	4.28548	1.82343e-05	0.00797798	15.7764	11.8744	49.7889	67.0939	104.445	13.8254	73.776
FBgn0032715	CG17597	38.954	2.62716	0.617169	4.25679	2.07381e-05	0.00861978	18.4058	14.2493	108.053	38.9453	168.273	16.3275	105.09
FBgn0037135	CG7414	486.348	-0.713439	0.168797	-4.2266	2.37246e-05	0.00939154	896.626	702.964	433.27	509.759	522.226	799.795	488.418
FBgn0037876	CG4820	29.1344	-1.87691	0.447427	-4.19489	2.73001e-05	0.0103157	105.176	53.4348	26.4835	16.1951	23.21	79.3054	21.9629
FBgn0041710	yellow-f	76.5842	2.10992	0.504843	4.17937	2.92321e-05	0.0105655	31.5528	43.9353	216.105	88.6873	203.088	37.744	169.293
FBgn0029873	CG3918	75.4194	-1.19422	0.287318	-4.15645	3.23228e-05	0.0111958	118.323	147.242	49.7889	60.9243	75.4326	132.783	62.0486
FBgn0035793	CG7546	157.458	-0.835687	0.204203	-4.09243	4.26874e-05	0.0141944	247.164	262.424	133.477	135.345	191.483	254.794	153.435
FBgn0020513	Paics	189.018	1.21689	0.300036	4.0558	4.99621e-05	0.0153714	120.952	135.368	349.582	234.443	324.941	128.16	302.988
FBgn0028694	Rpn11	419.192	-0.796209	0.196904	-4.04363	5.26296e-05	0.0153714	578.468	527.223	305.09	315.418	342.348	552.846	320.952
FBgn0030519	CG11151	337.354	1.6645	0.411776	4.04225	5.29411e-05	0.0153714	102.547	197.115	694.926	283.028	470.003	149.831	482.653
FBgn0283535	Vha26	431.823	1.07917	0.267171	4.03925	5.36234e-05	0.0153714	299.752	268.361	689.629	481.996	632.474	284.056	601.366
FBgn0028695	Rpn1	344.923	-0.889358	0.220862	-4.02677	5.65494e-05	0.0156698	562.692	491.6	241.529	321.588	284.323	527.146	282.48
FBgn0031220	CG4822	103.689	1.7917	0.450325	3.97867	6.93009e-05	0.0185838	31.5528	35.6232	123.943	101.026	133.458	33.588	119.476
FBgn0267861	Maf1	282.521	1.3572	0.342241	3.96563	7.32031e-05	0.0190168	86.7702	156.742	318.861	306.164	336.546	121.756	320.524
FBgn0265413	CG44325	115.052	1.93109	0.488344	3.95437	7.67371e-05	0.0193308	39.441	52.2473	245.767	91.0009	203.088	45.8442	179.952
FBgn0031907	CG5171	236.869	1.33248	0.338425	3.93731	8.23996e-05	0.0201467	136.729	156.742	476.702	259.892	382.966	146.735	373.187
FBgn0000117	arm	928.499	-0.615451	0.157473	-3.90831	9.29447e-05	0.0215079	1388.32	1250.37	796.623	938.543	829.759	1319.35	854.975
FBgn0266918	CG32486	397.744	-1.18348	0.30285	-3.9078	9.31413e-05	0.0215079	612.65	596.095	212.927	270.689	330.743	604.372	271.453
FBgn0037624	CG8223	225.128	-1.28831	0.333865	-3.85878	0.000113957	0.0249295	410.187	270.736	144.07	136.116	133.458	340.461	137.881
FBgn0037707	RnpS1	171.501	-1.13564	0.294227	-3.85973	0.000113514	0.0249295	315.528	227.988	82.6284	161.18	116.05	271.758	119.953
FBgn0033341	MrgBP	100.874	-1.27863	0.3328	-3.84203	0.000122023	0.0260096	168.282	144.868	63.5603	75.9626	34.8151	156.575	58.1127
FBgn0086906	sls	2917.1	-1.47917	0.387909	-3.81318	0.000137189	0.0285112	5006.38	5990.63	1502.14	2575.79	1833.59	5498.51	1970.51
FBgn0264075	tgo	91.9455	1.66434	0.439893	3.78351	0.00015463	0.0313522	21.0352	47.4976	121.824	126.476	87.0377	34.2664	111.779
FBgn0053481	dpr7	24.296	7.227	1.93556	3.73379	0.000188619	0.037333	0	0	131.358	10.7967	0	0	47.3849
FBgn0261836	Msp300	4815.79	-1.47613	0.396287	-3.7249	0.000195391	0.0377742	5484.93	5900.39	1189.64	2745.84	2204.95	5692.66	2046.81
FBgn0013726	pnut	263.712	-1.05228	0.28494	-3.69299	0.000221635	0.0418739	473.292	314.671	194.918	194.341	168.273	393.982	185.844
FBgn0028692	Rpn2	374.598	-0.832598	0.226895	-3.66953	0.000242995	0.0448893	620.539	492.787	284.962	337.012	307.533	556.663	309.836
FBgn0032773	fon	1017	1.2102	0.332198	3.643	0.000269476	0.0486989	796.708	872.768	2452.37	1082.76	2280.39	834.738	1938.5
FBgn0030158	CG9686	637.937	1.3385	0.369733	3.62017	0.000294404	0.0489477	226.128	346.732	1087.94	404.491	696.301	286.43	729.578
FBgn0036410	CG8100	29.6543	2.52987	0.69686	3.63038	0.000283005	0.0489477	10.5176	7.12464	68.857	28.1486	52.2226	8.82112	49.7427
FBgn0082598	akirin	1128.2	-0.582845	0.160293	-3.63612	0.000276771	0.0489477	1664.41	1280.06	1023.32	942.785	969.019	1472.24	978.375
FBgn0262699	fzr	400.382	-0.786094	0.217016	-3.62228	0.000292014	0.0489477	581.098	539.097	269.072	381.355	313.336	560.098	321.254
FBgn0033017	CG10465	94.4574	1.43621	0.398042	3.60819	0.000308343	0.0492933	36.8116	51.0599	144.07	104.882	116.05	43.9358	121.668
FBgn0040227	eIF3d1	594.007	-0.828093	0.229342	-3.61074	0.000305326	0.0492933	993.914	732.65	405.727	477.755	597.659	863.282	493.713
FBgn0264492	CkIIalpha	691.471	0.828541	0.231473	3.57942	0.000344353	0.0530112	305.01	446.477	619.713	720.295	684.696	375.744	674.902
FBgn0265011	Np	32.9907	-2.51647	0.702525	-3.58203	0.000340932	0.0530112	42.0704	42.7478	9.53405	7.71194	0	42.4091	5.74866
FBgn0051663	CG31663	32.9208	-3.47051	0.977547	-3.55023	0.000384897	0.0581754	23.6646	16.6242	5.29669	0	0	20.1444	1.76556
FBgn0032821	CdGAPr	306.22	-1.18337	0.334779	-3.53478	0.000408108	0.0595193	262.94	269.549	74.1537	131.489	162.47	266.244	122.704
FBgn0033782	sug	425.715	-1.1032	0.312842	-3.52638	0.000421279	0.0603808	1149.05	955.889	342.166	533.281	609.264	1052.47	494.904
FBgn0266802	asRNA:CR45264	13.7677	-4.45677	1.26755	-3.51604	0.000438027	0.0617173	5.2588	138.93	7.41537	1.15679	0	72.0946	2.85739
FBgn0031489	CG17224	116.91	1.3734	0.391673	3.50651	0.000454031	0.0620301	57.8468	81.9333	208.69	115.293	249.508	69.8901	191.164
FBgn0035402	Usp5	170.687	-1.01744	0.290214	-3.50584	0.000455171	0.0620301	352.34	288.548	114.409	165.035	214.693	320.444	164.712
FBgn0028663	VhaM9.7-b	324.788	1.04709	0.299481	3.49635	0.000471671	0.063242	168.282	197.115	433.27	352.05	348.151	182.698	377.823
FBgn0033476	oys	182.881	1.02159	0.292828	3.4887	0.000485383	0.0640475	86.7702	149.617	312.505	206.68	214.693	118.194	244.626
FBgn0002521	pho	131.846	1.15783	0.333145	3.47545	0.000510006	0.064381	49.9586	84.3082	169.494	138.429	162.47	67.1334	156.798
FBgn0028686	Rpt3	350.791	-0.644733	0.185543	-3.47485	0.000511145	0.064381	436.481	498.725	299.793	309.249	284.323	467.603	297.788
FBgn0250844	CG4218	10.2929	-3.73674	1.07491	-3.47634	0.000508307	0.064381	39.441	18.999	4.23735	1.15679	0	29.22	1.79805
FBgn0284436	CCT8	1136.84	-1.03382	0.29801	-3.46906	0.000522276	0.0648012	2174.51	1741.97	536.025	1060.39	1299.76	1958.24	965.393
FBgn0011640	lark	1028.46	-0.934382	0.270463	-3.45475	0.000550799	0.0671097	1856.36	1586.42	725.647	1041.5	934.204	1721.39	900.45
FBgn0038790	MtnC	23.5344	-5.48672	1.58956	-3.45172	0.000557027	0.0671097	13.147	9.49951	0	0	0	11.3233	0
FBgn0023514	CG14805	89.0297	-1.3786	0.403026	-3.42064	0.00062475	0.0683342	131.47	156.742	33.8988	86.7593	29.0126	144.106	49.8902
FBgn0031145	Ntf-2	543.542	-0.783825	0.227904	-3.43928	0.00058327	0.0683342	938.696	789.647	420.557	478.14	638.276	864.172	512.325
FBgn0031948	CG7149	32.7366	3.00059	0.877908	3.41789	0.000631093	0.0683342	0	18.999	103.815	33.5469	127.655	9.49951	88.3391
FBgn0035968	Slc45-1	43.6728	1.53762	0.449981	3.41709	0.000632953	0.0683342	23.6646	26.1237	55.0856	76.3482	98.6427	24.8941	76.6922
FBgn0035976	PGRP-LC	31.6614	2.46836	0.72167	3.42034	0.000625419	0.0683342	10.5176	11.8744	87.9251	29.691	75.4326	11.196	64.3496
FBgn0036641	Smn	110.37	-0.921897	0.269313	-3.42314	0.000619011	0.0683342	160.393	146.055	90.0438	87.5305	34.8151	153.224	70.7965
FBgn0039774	CDase	107.522	1.298	0.379773	3.41783	0.000631226	0.0683342	78.882	90.2454	242.589	131.489	272.718	84.5637	215.598
FBgn0264294	Cyt-b5	213.589	1.15281	0.336611	3.42474	0.000615392	0.0683342	86.7702	144.868	266.953	185.472	365.558	115.819	272.661
FBgn0033953	CG12861	13.2448	-3.76416	1.10577	-3.40412	0.000663781	0.0707437	63.1056	36.8106	5.29669	3.47037	0	49.9581	2.92236
FBgn0016675	Lectin-galC1	22.4128	6.82481	2.00902	3.39708	0.00068108	0.0716686	0	0	46.6109	23.907	40.6176	0	37.0452
FBgn0034366	Atg7	24.9112	2.09834	0.619803	3.3855	0.000710485	0.0729168	13.147	13.0618	61.4416	33.1613	87.0377	13.1044	60.5469
FBgn0034840	CG3124	19.9375	-3.37988	0.998046	-3.3865	0.000707915	0.0729168	134.099	26.1237	13.7714	3.08478	5.80251	80.1116	7.5529
FBgn0085484	Pdxk	136.018	1.29283	0.382517	3.37981	0.000725369	0.0735365	84.1408	98.5575	310.386	160.408	203.088	91.3491	224.627
FBgn0001142	Gs1	408.271	1.11706	0.333132	3.35321	0.000798814	0.0741961	315.528	412.041	1040.27	524.412	818.154	363.785	794.279
FBgn0002567	Rab32	57.4214	2.20052	0.655819	3.35538	0.000792552	0.0741961	28.9234	21.3739	146.189	66.3227	133.458	25.1487	115.323
FBgn0004959	phm	11.3189	6.69831	1.98941	3.36699	0.000759945	0.0741961	0	0	6.35603	4.24157	98.6427	0	36.4134
FBgn0015789	Rab10	254.738	0.689952	0.205745	3.35343	0.00079816	0.0741961	147.246	217.301	296.615	310.406	295.928	182.274	300.983
FBgn0028509	CenG1A	73.8491	1.65543	0.490766	3.37316	0.000743121	0.0741961	18.4058	26.1237	104.875	50.8988	58.0251	22.2647	71.2661
FBgn0031491	alpha4GT1	53.4544	1.72094	0.513927	3.3486	0.000812203	0.0741961	28.9234	32.0609	121.824	52.0556	145.063	30.4921	106.314
FBgn0032477	CG5287	18.5905	4.82388	1.44055	3.34864	0.000812088	0.0741961	2.6294	0	13.7714	26.6062	40.6176	1.3147	26.9984
FBgn0040503	CG7763	102.719	1.93114	0.573153	3.36933	0.000753523	0.0741961	36.8116	64.1217	304.03	124.162	156.668	50.4667	194.953
FBgn0086370	sra	135.424	1.24282	0.369555	3.36302	0.00077095	0.0741961	89.3996	90.2454	235.173	135.73	290.126	89.8225	220.343
FBgn0052756	CG32756	25.1649	2.05633	0.615127	3.34294	0.000828967	0.0749044	2.6294	10.687	39.1955	28.5342	29.0126	6.65818	32.2474
FBgn0039260	Smg6	94.0299	1.15562	0.346419	3.33591	0.000850195	0.07558	47.3292	64.1217	132.417	116.065	139.26	55.7255	129.247
FBgn0261934	dikar	115.825	-1.41067	0.423058	-3.33447	0.000854628	0.07558	289.234	149.617	102.756	96.3992	23.21	219.426	74.1217
FBgn0011710	Sep1	100.53	1.17878	0.354038	3.32952	0.000869959	0.076126	65.735	72.4338	188.562	139.586	139.26	69.0844	155.803
FBgn0037344	CG2926	211.999	-0.926711	0.279412	-3.31665	0.00091105	0.0778653	428.592	341.983	215.046	202.438	179.878	385.287	199.121
FBgn0262519	Mi-2	150.865	-1.29921	0.391948	-3.31477	0.000917201	0.0778653	305.01	233.926	145.129	121.463	34.8151	269.468	100.469
FBgn0267022	asRNA:CR45466	5.19881	-3.76009	1.13442	-3.31454	0.000917935	0.0778653	28.9234	13.0618	1.05934	1.92798	0	20.9926	0.995774
FBgn0025814	Mgstl	187.106	1.26369	0.381726	3.31045	0.000931473	0.0782155	55.2174	137.743	275.428	149.612	313.336	96.4802	246.125
FBgn0004435	Galphaq	210.716	1.26837	0.384049	3.30262	0.000957874	0.0793356	97.2878	117.556	391.955	192.027	185.68	107.422	256.554
FBgn0031424	VGlut	29.6156	6.28834	1.90506	3.30086	0.000963899	0.0793356	0	1.18744	175.85	14.2671	0	0.59372	63.3724
FBgn0016693	Past1	1273.24	-1.14852	0.349678	-3.2845	0.00102162	0.0818704	1162.2	1543.67	333.692	869.907	626.671	1352.93	610.09
FBgn0051472	sgll	67.7457	1.23179	0.374576	3.28848	0.00100729	0.0818704	26.294	37.9981	95.3405	65.5515	75.4326	32.146	78.7749
FBgn0085265	CG34236	18.044	3.9066	1.18966	3.28378	0.00102424	0.0818704	0	4.74976	43.4329	10.0255	87.0377	2.37488	46.832
FBgn0030412	Tomosyn	91.7545	-1.36754	0.417631	-3.27453	0.00105838	0.083483	205.093	103.307	56.145	67.0939	46.4201	154.2	56.553
FBgn0032196	CG5708	92.1877	1.47157	0.450244	3.26838	0.00108163	0.083483	21.0352	56.9971	161.019	101.026	69.6301	39.0161	110.559
FBgn0039828	CG1542	104.932	-1.2877	0.393728	-3.27054	0.00107344	0.083483	115.694	131.806	38.1362	73.2634	23.21	123.75	44.8699
FBgn0045823	vsg	578.548	0.821953	0.251546	3.26761	0.00108459	0.083483	517.992	428.666	1061.46	594.59	852.969	473.329	836.339
FBgn0263120	Acsl	184.488	1.34251	0.411755	3.26047	0.00111228	0.0848295	57.8468	84.3082	126.061	160.408	290.126	71.0775	192.198
FBgn0029093	cathD	892.271	1.0096	0.311329	3.24288	0.00118328	0.0894238	836.149	789.647	2301.94	963.607	1647.91	812.898	1637.82
FBgn0025639	Hmt4-20	81.519	-1.02402	0.317167	-3.22866	0.00124371	0.0930596	139.358	104.495	65.679	61.6955	34.8151	121.926	54.0632
FBgn0052115	CG32115	26.075	2.93283	0.909024	3.22635	0.00125378	0.0930596	0	14.2493	46.6109	22.3646	133.458	7.12464	67.4778
FBgn0003065	CG2150	16.2104	-4.35357	1.35885	-3.20386	0.00135599	0.0937828	34.1822	17.8116	2.11868	0.771194	0	25.9969	0.96329
FBgn0011336	Stt3B	279.272	-0.700904	0.219376	-3.19499	0.00139835	0.0937828	420.704	358.607	229.876	284.571	162.47	389.655	225.639
FBgn0025571	SF1	217.61	-1.12603	0.352538	-3.19406	0.00140289	0.0937828	441.739	314.671	155.723	254.108	75.4326	378.205	161.755
FBgn0028331	l(1)G0289	249.327	0.85097	0.266384	3.19452	0.00140062	0.0937828	178.799	167.429	362.294	273.388	295.928	173.114	310.537
FBgn0028644	beat-Ic	9.74496	6.56487	2.04673	3.20749	0.00133897	0.0937828	0	0	81.5691	7.71194	0	0	29.7603
FBgn0029881	pigs	473.454	-1.05172	0.32653	-3.2209	0.00127787	0.0937828	386.522	352.669	187.503	160.408	191.483	369.596	179.798
FBgn0038225	soti	12.7816	-4.70301	1.47024	-3.19881	0.00137997	0.0937828	21.0352	34.4357	2.11868	0.385597	0	27.7355	0.834758
FBgn0038271	UQCR-C1	1126.07	-0.954918	0.299105	-3.19259	0.00141004	0.0937828	1288.41	1177.94	387.718	762.711	771.734	1233.17	640.721
FBgn0038552	Alg1	27.4769	2.28341	0.715229	3.19256	0.00141018	0.0937828	5.2588	9.49951	39.1955	27.3774	58.0251	7.37916	41.5327
FBgn0039293	Alg9	87.1251	1.38373	0.431776	3.20475	0.00135182	0.0937828	21.0352	70.0589	121.824	100.641	174.075	45.5471	132.18
FBgn0043841	vir-1	458.588	1.23565	0.386432	3.19758	0.00138587	0.0937828	362.857	406.104	1306.16	544.077	870.377	384.481	906.873
FBgn0262880	CG43235	118.189	1.78787	0.557699	3.2058	0.00134686	0.0937828	60.4762	58.1845	358.056	110.281	139.26	59.3304	202.532
FBgn0267821	da	250.887	-1.03839	0.324904	-3.196	0.00139345	0.0937828	528.51	370.481	258.479	205.523	179.878	449.495	214.627
FBgn0013435	Cdc2rk	29.3854	-1.39372	0.437991	-3.18208	0.00146224	0.0946646	49.9586	51.0599	20.1274	17.7375	23.21	50.5093	20.3583
FBgn0027598	cindr	137.786	1.08294	0.342293	3.16377	0.00155741	0.0946646	99.9172	110.432	254.241	136.887	307.533	105.175	232.887
FBgn0032585	Nepl8	32.0137	2.87727	0.909586	3.16328	0.00156003	0.0946646	10.5176	13.0618	88.9845	47.0428	133.458	11.7897	89.8283
FBgn0033624	CG12384	226.939	1.12025	0.352325	3.17958	0.00147488	0.0946646	134.099	110.432	368.65	182.387	237.903	122.266	262.98
FBgn0034650	NC2alpha	49.6209	1.60701	0.505724	3.17765	0.00148476	0.0946646	23.6646	27.3111	67.7977	45.5004	150.865	25.4879	88.0545
FBgn0035639	kri	186.032	-0.938716	0.296097	-3.17029	0.00152285	0.0946646	252.422	275.486	86.8658	171.205	162.47	263.954	140.18
FBgn0036323	CG14118	280.702	1.08297	0.339757	3.18749	0.00143515	0.0946646	197.205	254.112	661.027	313.876	470.003	225.659	481.636
FBgn0037185	CG11367	27.8832	1.98611	0.628286	3.16115	0.00157148	0.0946646	13.147	7.12464	44.4922	29.3054	40.6176	10.1358	38.1384
FBgn0051559	CG31559	17.7548	-2.83324	0.895954	-3.16227	0.00156547	0.0946646	34.1822	18.999	1.05934	6.16955	0	26.5906	2.40963
FBgn0053494	CG33494	72.5427	1.83152	0.577202	3.17311	0.00150817	0.0946646	21.0352	53.4348	216.105	74.4202	121.853	37.235	137.459
FBgn0260991	Incenp	37.5424	-1.57752	0.496141	-3.17958	0.0014749	0.0946646	105.176	103.307	39.1955	38.9453	17.4075	104.242	31.8495
FBgn0263647	CG43638	6.97743	-6.01438	1.8972	-3.17013	0.00152371	0.0946646	26.294	7.12464	0	0	0	16.7093	0
FBgn0267454	asRNA:CR45804	7.00748	-3.86651	1.22064	-3.16762	0.00153693	0.0946646	21.0352	15.4367	2.11868	0.771194	0	18.236	0.96329
FBgn0034258	eIF3c	935.457	-0.523325	0.165915	-3.15417	0.00160956	0.0962607	1177.97	1126.88	694.926	964.764	707.906	1152.43	789.199
FBgn0004648	svr	152.345	1.09855	0.349066	3.14711	0.00164893	0.0979112	68.3644	131.806	288.14	136.501	249.508	100.085	224.716
FBgn0020653	Trxr-1	436.571	-0.746181	0.237434	-3.14268	0.00167407	0.0979841	599.503	575.908	305.09	416.445	313.336	587.706	344.957
FBgn0033437	CG12926	45.0097	1.87502	0.596327	3.14428	0.00166498	0.0979841	21.0352	27.3111	140.892	43.9581	87.0377	24.1732	90.6293
FBgn0051365	CG31365	26.2289	1.80956	0.576542	3.13865	0.00169731	0.0979841	15.7764	5.9372	38.1362	32.3901	23.21	10.8568	31.2455
FBgn0053510	CG33510	6.92075	5.71188	1.81942	3.13939	0.00169302	0.0979841	0	0	19.0681	6.94074	29.0126	0	18.3405
FBgn0001168	h	336.79	-0.860879	0.274873	-3.13191	0.0017367	0.0982282	615.28	518.911	284.962	363.618	272.718	567.095	307.099
FBgn0031661	Gmd	32.8252	2.01206	0.642448	3.13187	0.00173698	0.0982282	21.0352	9.49951	68.857	42.8013	63.8276	15.2674	58.4953
FBgn0035982	CG4461	50.6184	-4.06301	1.29676	-3.13319	0.00172915	0.0982282	0	24.9362	0	1.15679	0	12.4681	0.385597
FBgn0004638	drk	474.341	0.955922	0.305729	3.12669	0.00176785	0.099298	289.234	353.857	859.124	487.009	522.226	321.546	622.786
FBgn0035110	thoc7	114.285	-1.01439	0.324651	-3.12457	0.00178064	0.0993454	244.534	132.993	101.697	84.8313	87.0377	188.764	91.1885
FBgn0003721	Tm1	3142.37	-1.0609	0.340111	-3.11928	0.00181295	0.0999728	4953.79	5333.98	1434.34	2953.67	3023.11	5143.88	2470.38
FBgn0033886	Rpn13	257.804	-0.672982	0.215883	-3.11735	0.00182486	0.0999728	360.228	254.112	200.215	184.701	179.878	307.17	188.265
FBgn0047135	CG32276	453.035	1.02543	0.329201	3.11491	0.00183999	0.0999728	291.863	230.363	751.071	356.292	475.806	261.113	527.723
FBgn0267668	lncRNA:CR46006	119.464	1.96355	0.630157	3.11597	0.0018334	0.0999728	57.8468	65.3092	433.27	221.333	52.2226	61.578	235.608
FBgn0029506	Tsp42Ee	431.594	1.1986	0.38546	3.10953	0.00187383	0.100655	173.54	328.921	788.148	417.987	539.634	251.231	581.923
FBgn0267791	HnRNP-K	273.866	-1.00011	0.321673	-3.10907	0.00187676	0.100655	525.88	360.982	233.055	284.956	110.248	443.431	209.419
FBgn0005613	Sox15	15.3569	-4.9863	1.60588	-3.10503	0.00190259	0.101386	57.8468	23.7488	2.11868	0.771194	0	40.7978	0.96329
FBgn0034313	CG5726	36.5403	1.6378	0.528271	3.1003	0.00193323	0.102363	15.7764	11.8744	33.8988	45.886	46.4201	13.8254	42.0683
FBgn0031603	CG15432	33.5002	1.8488	0.597845	3.09244	0.0019852	0.104175	2.6294	15.4367	56.145	26.9918	29.0126	9.03306	37.3831
FBgn0260744	Tango9	165.347	1.06718	0.345214	3.09134	0.00199252	0.104175	99.9172	109.244	282.843	156.167	226.298	104.581	221.769
FBgn0010877	l(3)05822	72.8465	1.27978	0.414978	3.08396	0.00204263	0.104862	15.7764	49.8725	110.171	84.0601	52.2226	32.8244	82.1513
FBgn0030007	alpha-PheRS	141.956	-0.929578	0.301436	-3.08384	0.00204351	0.104862	197.205	130.618	74.1537	99.0984	69.6301	163.912	80.9608
FBgn0036116	CG7888	19.968	-3.60665	1.16849	-3.08659	0.00202469	0.104862	49.9586	21.3739	1.05934	3.47037	5.80251	35.6663	3.44407
FBgn0266359	asRNA:CR45007	11.9204	-3.33158	1.08101	-3.08193	0.00205664	0.104889	60.4762	22.5613	7.41537	2.69918	0	41.5188	3.37152
FBgn0001316	klar	615.505	-1.01395	0.329358	-3.07856	0.00208002	0.104925	728.344	881.08	330.514	502.433	353.953	804.712	395.633
FBgn0029791	AdamTS-B	23.095	-2.38635	0.775242	-3.07819	0.0020826	0.104925	70.9938	33.2483	13.7714	10.0255	0	52.1211	7.93231
FBgn0039900	Syt7	39.0884	2.63436	0.856498	3.07573	0.00209988	0.105158	18.4058	7.12464	146.189	33.5469	40.6176	12.7652	73.4511
FBgn0051550	CG31550	120.46	-1.378	0.450148	-3.06121	0.00220448	0.109735	362.857	182.866	66.7383	111.823	145.063	272.861	107.875
FBgn0037370	CG1236	268.202	1.02859	0.337215	3.05024	0.00228659	0.113145	231.387	199.49	444.922	255.651	649.881	215.439	450.151
FBgn0052521	CG32521	117.02	1.12221	0.36819	3.0479	0.00230447	0.113355	68.3644	98.5575	227.758	160.023	162.47	83.4609	183.417
FBgn0005666	bt	2155.7	-1.43215	0.471143	-3.03973	0.0023679	0.115296	2992.26	3993.36	797.682	1919.5	1160.5	3492.81	1292.56
FBgn0010397	LamC	434.351	-1.46645	0.482781	-3.0375	0.00238552	0.115296	780.932	641.217	81.5691	330.842	371.361	711.075	261.257
FBgn0037632	CCT7	1167.73	-1.00039	0.329174	-3.03908	0.00237298	0.115296	2116.67	1598.29	501.067	993.683	1317.17	1857.48	937.307
FBgn0039927	CG11155	39.0856	3.13289	1.03395	3.03	0.0024455	0.117511	7.8882	10.687	203.393	21.979	17.4075	9.28758	80.9265
FBgn0014859	Hr38	450.039	-3.38409	1.11888	-3.02452	0.00249026	0.118295	34.1822	20.1865	2.11868	3.47037	0	27.1843	1.86302
FBgn0035033	CG3548	45.7826	1.63776	0.541404	3.02502	0.00248617	0.118295	21.0352	21.3739	69.9164	47.0428	92.8402	21.2046	69.9331
FBgn0039229	Saf-B	207.684	-1.39822	0.462755	-3.0215	0.00251522	0.118801	436.481	352.669	105.934	239.07	87.0377	394.575	144.014
FBgn0034032	CG8195	19.6116	2.47239	0.820389	3.01368	0.00258099	0.121219	2.6294	7.12464	43.4329	21.979	23.21	4.87702	29.5407
FBgn0020622	Pi3K21B	221.607	0.968948	0.321892	3.01016	0.00261109	0.121944	76.2526	169.804	251.063	271.075	214.693	123.028	245.61
FBgn0261925	CG42792	307.981	1.64622	0.54858	3.00087	0.00269211	0.125025	231.387	283.798	1018.02	409.504	1003.83	257.593	810.454
FBgn0058178	CG40178	90.1965	1.68878	0.563858	2.99505	0.00274402	0.126728	47.3292	36.8106	208.69	62.4667	133.458	42.0699	134.871
FBgn0038838	TotB	250.092	1.70402	0.571122	2.98364	0.0028484	0.129392	176.17	189.99	799.801	300.766	696.301	183.08	598.956
FBgn0039073	CG4408	99.7136	1.45591	0.48775	2.98495	0.00283622	0.129392	81.5114	86.6831	300.852	133.031	266.916	84.0972	233.6
FBgn0053202	dpr11	10.9822	5.83784	1.95657	2.9837	0.00284783	0.129392	0	0	44.4922	3.47037	5.80251	0	17.9217
FBgn0024963	GluClalpha	32.3678	3.25057	1.09117	2.97898	0.00289207	0.130365	2.6294	9.49951	152.545	26.9918	0	6.06446	59.8455
FBgn0031759	lid	272.752	-1.06819	0.35869	-2.97802	0.00290117	0.130365	533.768	338.42	171.613	310.791	110.248	436.094	197.551
FBgn0036551	CG17029	68.2981	-1.63923	0.550882	-2.97565	0.00292365	0.130668	65.735	159.117	13.7714	55.1404	40.6176	112.426	36.5098
FBgn0052690	lncRNA:CR32690	11.7251	-3.6478	1.22736	-2.97208	0.0029579	0.131492	28.9234	21.3739	3.17802	1.54239	0	25.1487	1.57347
FBgn0027329	CCT6	1236.66	-0.882481	0.297108	-2.97024	0.00297567	0.131578	1995.72	1724.16	597.467	1328.77	1102.48	1859.94	1009.57
FBgn0002524	lace	32.3139	2.1624	0.729476	2.96432	0.00303352	0.132083	10.5176	4.74976	29.6615	35.4749	23.21	7.63368	29.4488
FBgn0028473	Non1	499.411	-0.652307	0.220062	-2.9642	0.00303475	0.132083	744.12	579.47	391.955	402.949	481.608	661.795	425.504
FBgn0051344	CG31344	35.2853	2.20273	0.74243	2.96692	0.00300795	0.132083	13.147	7.12464	75.213	27.763	23.21	10.1358	42.062
FBgn0266347	nAChRalpha4	11.7764	5.26743	1.78031	2.95871	0.00308925	0.133755	0	1.18744	65.679	11.1823	17.4075	0.59372	31.4229
FBgn0038979	tHMG2	6.78756	-4.25947	1.44205	-2.95376	0.00313927	0.134123	21.0352	7.12464	1.05934	0.385597	0	14.0799	0.481645
FBgn0039094	CG10184	31.7537	1.64705	0.557201	2.95594	0.00311722	0.134123	21.0352	14.2493	56.145	53.9836	46.4201	17.6422	52.1829
FBgn0259482	Mob3	81.6027	1.54587	0.523475	2.95309	0.00314615	0.134123	21.0352	43.9353	105.934	60.5387	145.063	32.4852	103.845
FBgn0004870	bab1	10.1848	4.76495	1.61735	2.94615	0.00321755	0.135122	0	1.18744	11.6527	21.2078	40.6176	0.59372	24.4927
FBgn0040850	CG15210	45.6307	1.96371	0.66655	2.94607	0.00321836	0.135122	18.4058	15.4367	98.5185	30.4622	69.6301	16.9213	66.2036
FBgn0087002	apolpp	3193.96	1.05716	0.35846	2.94916	0.00318639	0.135122	2984.37	3010.16	9577.48	3336.18	5796.71	2997.26	6236.79
FBgn0003279	RpL4	4783.79	-0.548145	0.186223	-2.94349	0.00324532	0.135548	6073.92	5865.95	3059.37	4534.62	4682.63	5969.93	4092.21
FBgn0030717	Slc25A46a	31.4782	1.79983	0.611773	2.94199	0.0032611	0.135548	10.5176	7.12464	26.4835	34.7037	17.4075	8.82112	26.1982
FBgn0262127	kibra	408.519	-1.04071	0.354074	-2.93924	0.00329022	0.136077	386.522	388.293	155.723	225.189	179.878	387.407	186.93
FBgn0039130	CG5854	139.355	1.13809	0.387568	2.93648	0.00331959	0.136613	105.176	74.8087	242.589	156.552	185.68	89.9924	194.94
FBgn0026404	Dronc	96.2048	1.26508	0.431209	2.93379	0.00334852	0.137124	44.6998	72.4338	212.927	98.7128	116.05	58.5668	142.563
FBgn0014020	Rho1	1054.09	0.544216	0.186489	2.91821	0.00352043	0.139603	825.632	794.397	1316.76	1258.2	916.797	810.014	1163.92
FBgn0027588	GCS2alpha	275.505	-0.886364	0.303758	-2.918	0.00352287	0.139603	454.886	407.292	261.657	221.718	208.89	431.089	230.755
FBgn0034137	CG4945	157.998	-1.13109	0.386732	-2.92472	0.00344761	0.139603	260.311	274.298	104.875	149.612	104.445	267.305	119.644
FBgn0260972	alc	125.093	0.78002	0.26748	2.91619	0.00354338	0.139603	92.029	78.371	129.239	158.866	139.26	85.2	142.455
FBgn0260987	vtd	199.648	1.13585	0.388755	2.92176	0.00348058	0.139603	63.1056	131.806	258.479	204.752	191.483	97.4557	218.238
FBgn0263351	AP-2mu	69.3109	1.14579	0.392714	2.91762	0.00352715	0.139603	13.147	52.2473	86.8658	77.505	75.4326	32.6972	79.9345
FBgn0264746	CG44004	13.9477	2.69977	0.925418	2.91736	0.0035301	0.139603	5.2588	2.37488	19.0681	14.2671	46.4201	3.81684	26.5851
FBgn0264776	CG44014	8.7349	4.86635	1.664	2.92449	0.00345016	0.139603	0	0	16.9494	6.94074	0	0	7.96339
FBgn0051075	CG31075	287.114	1.05058	0.360808	2.91175	0.00359406	0.140931	194.576	286.173	677.977	355.906	470.003	240.374	501.295
FBgn0022774	Oat	144.355	1.0932	0.37633	2.9049	0.00367371	0.142708	110.435	153.18	393.015	183.159	278.521	131.807	284.898
FBgn0046113	GluRIIC	26.293	-1.82527	0.628341	-2.90491	0.00367361	0.142708	36.8116	29.686	6.35603	10.7967	11.605	33.2488	9.58592
FBgn0040099	lectin-28C	184.559	1.72548	0.594825	2.90082	0.00372185	0.143906	113.064	110.432	461.872	200.51	452.596	111.748	371.659
FBgn0030893	RhoGAP16F	17.959	2.52477	0.871793	2.89606	0.0037788	0.145431	5.2588	5.9372	56.145	20.051	17.4075	5.598	31.2012
FBgn0051313	CG31313	104.857	1.62909	0.562981	2.89368	0.00380754	0.145862	47.3292	60.5594	235.173	64.3947	214.693	53.9443	171.42
FBgn0011573	Cdc37	205.124	-0.82465	0.285289	-2.89058	0.00384531	0.146543	257.681	308.734	117.587	189.328	179.878	283.208	162.264
FBgn0036787	CG4306	60.4824	1.88949	0.653954	2.88934	0.00386056	0.146543	10.5176	47.4976	145.129	66.7083	133.458	29.0076	115.098
FBgn0030556	mRNA-cap	144.854	-0.926428	0.321183	-2.88442	0.00392133	0.147064	236.646	223.239	88.9845	136.501	145.063	229.942	123.516
FBgn0261831	CG42763	36.3112	2.44261	0.846972	2.88394	0.00392737	0.147064	10.5176	20.1865	117.587	44.7292	98.6427	15.352	86.9862
FBgn0262117	IntS3	121.725	0.897469	0.310903	2.88665	0.00389364	0.147064	42.0704	109.244	190.681	131.489	116.05	75.6574	146.073
FBgn0051274	CG31274	12.675	2.66044	0.922984	2.88243	0.00394623	0.147108	0	5.9372	28.6021	17.3519	29.0126	2.9686	24.9889
FBgn0029943	Atg5	37.5049	1.65191	0.573494	2.88043	0.00397138	0.147115	21.0352	9.49951	49.7889	26.9918	69.6301	15.2674	48.8036
FBgn0032949	Lamp1	375.268	1.15673	0.401698	2.8796	0.00398182	0.147115	160.393	229.176	575.221	333.927	400.373	194.785	436.507
FBgn0023540	CG3630	115.626	-1.54156	0.536041	-2.87582	0.00402974	0.148227	144.617	138.93	9.53405	62.4667	87.0377	141.774	53.0128
FBgn0022349	CG1910	433.7	-0.649798	0.226292	-2.8715	0.00408532	0.148635	560.062	672.091	298.734	418.373	493.213	616.077	403.44
FBgn0035678	CG10469	7.29382	5.72531	1.99433	2.87079	0.00409447	0.148635	0	0	33.8988	5.39836	11.605	0	16.9674
FBgn0261793	Trf2	875.19	-0.860675	0.299526	-2.87346	0.00406004	0.148635	941.326	921.453	591.111	605.773	307.533	931.389	501.472
FBgn0051648	CG31648	45.5405	-1.48578	0.518557	-2.86522	0.00416714	0.150615	49.9586	62.9343	10.5934	21.5934	40.6176	56.4465	24.2681
FBgn0023534	CG17778	10.8944	6.03134	2.1072	2.86225	0.00420649	0.151379	0	0	59.323	1.92798	0	0	20.417
FBgn0029778	RhoGAP5A	165.78	-0.986869	0.345192	-2.8589	0.00425114	0.151646	289.234	295.672	116.527	145.37	197.285	292.453	153.061
FBgn0046876	Obp83ef	85.9313	1.46104	0.511284	2.85759	0.00426865	0.151646	34.1822	84.3082	244.707	103.34	156.668	59.2452	168.238
FBgn0261238	Alh	106.866	-0.971476	0.339689	-2.8599	0.00423777	0.151646	181.429	179.303	80.5097	104.497	87.0377	180.366	90.6814
FBgn0052626	AMPdeam	73.7221	1.47046	0.515197	2.85417	0.00431494	0.152639	23.6646	54.6222	187.503	94.0857	40.6176	39.1434	107.402
FBgn0037620	ranshi	6.72387	5.09592	1.78684	2.85192	0.0043456	0.153072	0	0	12.7121	6.16955	17.4075	0	12.0964
FBgn0039710	dgt1	46.7325	-1.3802	0.484323	-2.84975	0.00437537	0.15347	128.841	48.685	20.1274	38.5597	46.4201	88.7628	35.0357
FBgn0029006	Smurf	93.1488	1.15879	0.40705	2.84679	0.00441619	0.153951	55.2174	51.0599	129.239	101.798	127.655	53.1387	119.564
FBgn0030969	Usp39	78.8305	-1.06253	0.373505	-2.84475	0.00444458	0.153951	115.694	118.744	40.2549	73.649	46.4201	117.219	53.4413
FBgn0037643	ScsbetaA	623.214	0.692636	0.243701	2.84215	0.00448103	0.153951	412.816	455.977	694.926	653.201	777.537	434.396	708.555
FBgn0038577	CG12321	53.8556	1.43323	0.504286	2.84211	0.00448166	0.153951	23.6646	21.3739	87.9251	45.5004	40.6176	22.5193	58.0144
FBgn0086448	PIG-Q	15.627	2.8207	0.992266	2.84269	0.00447351	0.153951	2.6294	3.56232	26.4835	19.2798	23.21	3.09586	22.9911
FBgn0023172	RhoGEF2	89.6337	-1.12264	0.395872	-2.83586	0.00457019	0.155181	186.687	122.306	55.0856	72.1066	92.8402	154.497	73.3441
FBgn0069354	Porin2	10.6803	-3.11514	1.09857	-2.83563	0.00457349	0.155181	18.4058	11.8744	1.05934	2.31358	0	15.1401	1.12431
FBgn0003885	alphaTub84D	331.716	-0.684006	0.241551	-2.83172	0.00462979	0.155878	539.027	404.917	268.013	343.567	243.705	471.972	285.095
FBgn0033649	pyr	10.0635	5.00538	1.76849	2.83031	0.00465027	0.155878	0	1.18744	43.4329	31.6189	0	0.59372	25.0173
FBgn0261802	CG42748	746.021	-0.773593	0.273322	-2.83034	0.00464989	0.155878	638.944	740.962	308.268	521.327	371.361	689.953	400.318
FBgn0015576	alpha-Est8	17.5929	2.61649	0.925679	2.82657	0.00470502	0.156161	5.2588	5.9372	51.9076	26.2206	23.21	5.598	33.7794
FBgn0025463	Bap60	145.706	-1.04419	0.369508	-2.82588	0.00471508	0.156161	344.452	193.553	128.18	149.226	98.6427	269.002	125.35
FBgn0029941	CG1677	184.262	-0.842368	0.298074	-2.82604	0.00471275	0.156161	357.599	248.175	147.248	141.514	243.705	302.887	177.489
FBgn0028939	NimC2	82.9218	1.3561	0.480799	2.8205	0.00479486	0.158173	49.9586	86.6831	245.767	125.705	162.47	68.3208	177.981
FBgn0015778	rin	1567.07	-0.694553	0.246689	-2.81551	0.00487006	0.158788	1956.27	1933.15	1147.26	1332.24	1114.08	1944.71	1197.86
FBgn0043069	MESK4	26.2643	2.0856	0.740568	2.81622	0.00485924	0.158788	7.8882	17.8116	68.857	21.979	92.8402	12.8499	61.2254
FBgn0050460	CG30460	273.031	-1.25385	0.445345	-2.81546	0.00487078	0.158788	318.158	290.923	64.6197	175.061	145.063	304.54	128.248
FBgn0036934	sNPF-R	5.31103	5.29147	1.88111	2.81295	0.00490897	0.158837	0	0	28.6021	6.16955	0	0	11.5906
FBgn0264617	asRNA:CR43957	6.24253	5.33221	1.89566	2.81285	0.0049105	0.158837	0	0	9.53405	5.78395	29.0126	0	14.7769
FBgn0035839	CG7550	33.2493	1.74346	0.620107	2.81154	0.00493042	0.158863	15.7764	11.8744	38.1362	25.835	92.8402	13.8254	52.2705
FBgn0261064	Rbsn-5	28.6765	-1.30267	0.464234	-2.80606	0.00501519	0.16097	52.588	36.8106	22.2461	15.8095	11.605	44.6993	16.5535
FBgn0002930	nec	68.1124	1.09685	0.391563	2.8012	0.00509123	0.16154	65.735	61.7468	173.732	83.6745	162.47	63.7409	139.959
FBgn0011701	repo	21.2516	2.21839	0.791391	2.80315	0.00506054	0.16154	7.8882	7.12464	41.3142	21.5934	46.4201	7.50642	36.4426
FBgn0038282	dpr9	18.4358	3.88102	1.38503	2.80211	0.00507693	0.16154	0	5.9372	131.358	15.8095	0	2.9686	49.0558
FBgn0005278	Sam-S	342.092	0.600195	0.214441	2.79888	0.00512807	0.162058	202.464	284.985	315.683	410.275	411.978	243.725	379.312
FBgn0264606	Fife	6.57351	5.9186	2.11551	2.79772	0.00514654	0.162058	0	0	18.0088	3.85597	40.6176	0	20.8274
FBgn0020255	Ran	1149.63	-0.456304	0.16347	-2.79136	0.00524865	0.164649	1380.44	1361.99	972.473	1042.27	974.822	1371.21	996.521
FBgn0025683	CG3164	155.774	1.14843	0.412486	2.78417	0.00536653	0.167091	84.1408	102.12	262.716	185.472	168.273	93.1303	205.487
FBgn0026787	Nhe1	20.677	2.03935	0.732483	2.78416	0.00536668	0.167091	2.6294	10.687	31.7802	23.5214	46.4201	6.65818	33.9072
FBgn0086758	chinmo	40.4316	2.95184	1.0612	2.78159	0.00540934	0.16779	0	21.3739	212.927	33.9325	17.4075	10.687	88.089
FBgn0030341	p24-1	192.89	-0.62319	0.224159	-2.78013	0.00543374	0.167921	252.422	207.802	144.07	143.056	168.273	230.112	151.8
FBgn0000287	salr	684.655	-1.22438	0.441509	-2.77316	0.0055514	0.168879	999.172	1134	194.918	650.502	528.029	1066.59	457.816
FBgn0022986	qkr58E-1	219.706	-0.73433	0.264882	-2.77229	0.00556632	0.168879	407.557	298.047	215.046	200.125	220.495	352.802	211.889
FBgn0026238	gus	241.289	1.26384	0.455717	2.77331	0.00554896	0.168879	70.9938	181.678	315.683	269.918	348.151	126.336	311.25
FBgn0029992	Upf2	61.527	1.37653	0.495807	2.77634	0.00549744	0.168879	26.294	24.9362	36.0175	63.6235	121.853	25.6151	73.8313
FBgn0039644	rdog	25.2601	2.06565	0.744396	2.77493	0.00552132	0.168879	7.8882	8.31208	58.2636	21.2078	17.4075	8.10014	32.293
FBgn0053523	CG33523	60.1669	1.57587	0.568758	2.77073	0.00559307	0.169073	28.9234	23.7488	60.3823	48.5852	145.063	26.3361	84.6768
FBgn0030710	CG8924	27.0238	1.43094	0.516859	2.76853	0.00563093	0.169601	5.2588	22.5613	46.6109	33.9325	58.0251	13.9101	46.1895
FBgn0265190	PIG-S	22.9303	-1.73613	0.627997	-2.76455	0.00570014	0.171066	73.6232	18.999	12.7121	12.3391	17.4075	46.3111	14.1529
FBgn0051694	CG31694	94.8405	1.00232	0.362911	2.76188	0.00574694	0.17185	44.6998	77.1836	136.655	93.7001	168.273	60.9417	132.876
FBgn0010215	alpha-Cat	240.88	0.682967	0.247451	2.76	0.00578006	0.172221	191.946	184.053	342.166	230.973	353.953	188	309.031
FBgn0013686	mt:lrRNA	172872	1.32924	0.482376	2.7556	0.00585842	0.1725	21511.1	97055.4	161470	137736	147703	59283.2	148969
FBgn0014127	barr	37.8997	-1.39678	0.507134	-2.75427	0.00588236	0.1725	81.5114	92.6203	33.8988	42.0301	11.605	87.0658	29.178
FBgn0031970	CG7227	49.5021	1.58182	0.57444	2.75367	0.00589319	0.1725	39.441	30.8734	134.536	48.1996	139.26	35.1572	107.332
FBgn0033757	muskelin	23.513	1.94772	0.706325	2.75754	0.00582382	0.1725	0	13.0618	22.2461	34.7037	40.6176	6.53092	32.5225
FBgn0038853	RhoGAP93B	68.9039	-1.03343	0.375211	-2.75425	0.00588264	0.1725	126.211	102.12	51.9076	59.3819	52.2226	114.166	54.504
FBgn0011288	Snap25	30.2291	3.65829	1.32956	2.75151	0.00593214	0.172528	5.2588	4.74976	162.079	16.1951	5.80251	5.00428	61.3588
FBgn0052666	Drak	187.455	-1.08757	0.395291	-2.75132	0.00593565	0.172528	260.311	248.175	96.3998	106.039	174.075	254.243	125.505
FBgn0020018	Ppox	124.733	-0.937333	0.340936	-2.74929	0.00597244	0.172993	123.582	144.868	47.6702	85.6025	81.2352	134.225	71.5026
FBgn0029990	CG2233	2115.45	1.13589	0.4137	2.74569	0.00603843	0.174297	1409.36	1835.78	4985.25	2077.98	3643.98	1622.57	3569.07
FBgn0015019	CCT3	1002.2	-0.908444	0.331292	-2.74213	0.00610429	0.175259	1346.25	1283.62	436.448	938.157	725.314	1314.94	699.973
FBgn0022959	yps	2629.51	-0.625599	0.228281	-2.74048	0.00613501	0.175259	4088.72	3431.7	1810.41	2930.15	2570.51	3760.21	2437.02
FBgn0040398	CG14629	356.112	1.1534	0.420818	2.74085	0.00612809	0.175259	270.828	289.735	909.972	402.563	557.041	280.282	623.192
FBgn0004179	Csp	178.389	0.827922	0.302837	2.73389	0.00625914	0.176837	115.694	131.806	313.564	197.811	121.853	123.75	211.076
FBgn0036340	SRm160	107.304	-0.722589	0.264222	-2.73478	0.00624226	0.176837	178.799	163.867	90.0438	92.1577	162.47	171.333	114.891
FBgn0259224	CG42324	40.5919	2.00767	0.734593	2.73304	0.00627535	0.176837	13.147	24.9362	148.307	42.4157	40.6176	19.0416	77.1136
FBgn0259238	CG42336	99.9778	1.38482	0.506595	2.73358	0.00626505	0.176837	86.7702	51.0599	187.503	79.433	284.323	68.9151	183.753
FBgn0004875	enc	607.749	-0.819885	0.300733	-2.72629	0.00640514	0.17903	539.027	685.152	235.173	481.996	313.336	612.09	343.502
FBgn0015010	Ag5r	26.3164	1.80498	0.662223	2.72564	0.00641778	0.17903	7.8882	13.0618	54.0263	23.5214	40.6176	10.475	39.3884
FBgn0037728	p23	1458.9	-0.630708	0.231271	-2.72713	0.00638873	0.17903	1759.07	1439.18	912.091	998.696	1206.92	1599.12	1039.24
FBgn0015039	Cyp9b2	8.18813	-3.37962	1.24178	-2.7216	0.00649673	0.179542	23.6646	11.8744	1.05934	2.31358	0	17.7695	1.12431
FBgn0040942	CG12643	528.603	0.952811	0.34988	2.72325	0.00646423	0.179542	265.569	391.855	654.671	519.013	760.129	328.712	644.605
FBgn0062517	CG16984	6.58192	-5.1629	1.89716	-2.72138	0.00650094	0.179542	60.4762	7.12464	1.05934	0.771194	0	33.8004	0.610178
FBgn0025620	CG13360	25.2912	2.68697	0.991621	2.70967	0.00673494	0.184906	7.8882	1.18744	27.5428	11.1823	40.6176	4.53782	26.4476
FBgn0261641	CG42724	156.27	-0.934894	0.34505	-2.70944	0.00673962	0.184906	283.975	238.675	128.18	176.989	81.2352	261.325	128.801
FBgn0030738	CG9915	52.6453	-1.05694	0.39052	-2.7065	0.00679971	0.185331	107.805	79.5584	42.3735	47.4284	40.6176	93.6819	43.4732
FBgn0040056	CG17698	36.4982	1.76943	0.653674	2.7069	0.00679157	0.185331	7.8882	11.8744	51.9076	26.2206	23.21	9.8813	33.7794
FBgn0030887	CG6867	32.5133	1.50827	0.557779	2.70406	0.00684983	0.185481	7.8882	20.1865	40.2549	40.1021	58.0251	14.0373	46.1274
FBgn0051988	CG31988	35.2079	-2.32271	0.858714	-2.70487	0.00683316	0.185481	81.5114	75.9961	33.8988	4.62716	5.80251	78.7538	14.7762
FBgn0002543	robo2	60.5044	-1.21365	0.449674	-2.69896	0.00695559	0.186786	55.2174	109.244	38.1362	37.7885	29.0126	82.2309	34.9791
FBgn0034897	Sesn	509.531	0.656432	0.243375	2.6972	0.00699253	0.186786	202.464	265.986	453.397	334.313	319.138	234.225	368.949
FBgn0039924	PIP4K	261.602	1.29448	0.479798	2.69796	0.00697648	0.186786	126.211	141.305	424.795	278.787	278.521	133.758	327.367
FBgn0262518	Rab8	106.458	1.08452	0.402082	2.69726	0.00699125	0.186786	65.735	80.7459	217.164	107.967	145.063	73.2404	156.731
FBgn0263398	Uck	195.358	0.800332	0.29682	2.69635	0.00701039	0.186786	120.952	176.928	349.582	231.358	191.483	148.94	257.474
FBgn0004401	Pep	635.766	-0.804595	0.298875	-2.69208	0.00710076	0.18859	1114.87	807.459	490.474	729.935	400.373	961.162	540.261
FBgn0025697	santa-maria	189.65	1.41032	0.524147	2.69069	0.00713048	0.188776	44.6998	43.9353	203.393	96.7848	34.8151	44.3175	111.664
FBgn0030343	ATP7	35.048	1.38652	0.515961	2.68727	0.00720396	0.189514	15.7764	22.5613	72.035	50.5132	17.4075	19.1689	46.6519
FBgn0044826	Pak3	259.721	0.673944	0.250743	2.68779	0.00719274	0.189514	173.54	191.178	307.208	294.21	266.916	182.359	289.445
FBgn0011230	poe	270.619	-0.870803	0.324183	-2.68615	0.00722809	0.189549	389.151	409.667	151.485	248.71	266.916	399.409	222.37
FBgn0035622	TM9SF3	58.6402	1.09357	0.407293	2.68498	0.00725349	0.189617	31.5528	34.4357	83.6878	75.9626	34.8151	32.9943	64.8218
FBgn0052064	S-Lap4	19.8701	-3.01866	1.12472	-2.68392	0.00727639	0.189619	39.441	32.0609	7.41537	3.47037	0	35.7509	3.62858
FBgn0027493	AdSS	149.091	0.753556	0.281409	2.6778	0.00741082	0.190095	94.6584	100.932	134.536	192.027	168.273	97.7954	164.945
FBgn0031077	THADA	21.4308	-1.82584	0.682219	-2.67632	0.00744344	0.190095	42.0704	24.9362	5.29669	14.6527	0	33.5033	6.64979
FBgn0032840	sNPF	19.6995	5.45251	2.03605	2.67798	0.00740674	0.190095	0	1.18744	92.1625	13.1103	0	0.59372	35.0909
FBgn0034512	CG18067	211.935	1.42162	0.530179	2.6814	0.00733155	0.190095	84.1408	144.868	386.659	147.684	406.176	114.504	313.506
FBgn0036821	CG3961	122.381	1.12378	0.419553	2.67852	0.00739486	0.190095	105.176	106.87	346.404	128.018	220.495	106.023	231.639
FBgn0036958	CG17233	147.801	-0.752211	0.280784	-2.67897	0.00738498	0.190095	234.017	242.238	140.892	140.357	145.063	238.127	142.104
FBgn0261552	ps	271.475	1.05885	0.39571	2.67582	0.00745472	0.190095	181.429	189.99	641.959	215.934	295.928	185.709	384.607
FBgn0046225	CG17230	22.2041	-1.35233	0.505615	-2.67462	0.00748148	0.190194	42.0704	37.9981	19.0681	15.4239	5.80251	40.0342	13.4315
FBgn0029152	Mkrn1	153.498	0.938233	0.350961	2.67332	0.00751035	0.190346	65.735	97.37	194.918	157.709	110.248	81.5525	154.292
FBgn0261800	LanB1	337.992	-0.624979	0.233882	-2.67219	0.00753573	0.190409	546.915	448.852	259.538	398.322	290.126	497.884	315.995
FBgn0260635	Diap1	234.064	-0.642146	0.240755	-2.66722	0.00764814	0.192664	349.71	311.109	212.927	203.981	220.495	330.41	212.468
FBgn0045770	S-Lap3	12.4677	-3.19745	1.19954	-2.66555	0.0076862	0.193037	55.2174	16.6242	6.35603	1.15679	5.80251	35.9208	4.43844
FBgn0010052	Jhe	218.13	0.968443	0.364185	2.65921	0.00783243	0.194979	141.988	211.364	438.566	272.617	336.546	176.676	349.243
FBgn0025621	CG16989	64.9093	-1.1017	0.414377	-2.65869	0.00784454	0.194979	144.617	97.37	46.6109	73.2634	34.8151	120.994	51.5631
FBgn0030993	Mec2	117.428	1.54342	0.580458	2.65896	0.00783819	0.194979	31.5528	90.2454	282.843	135.73	121.853	60.8991	180.142
FBgn0033875	CG6357	271.551	1.2532	0.471774	2.65635	0.00789907	0.194979	189.317	208.989	621.832	271.846	539.634	199.153	477.77
FBgn0036428	Gbs-70E	369.094	0.661055	0.248879	2.65613	0.00790422	0.194979	231.387	286.173	370.769	411.818	470.003	258.78	417.53
FBgn0261799	dsx-c73A	56.0356	-1.94392	0.731473	-2.65754	0.00787125	0.194979	65.735	36.8106	14.8307	10.0255	17.4075	51.2728	14.0879
FBgn0010415	Sdc	1090.31	0.6296	0.237449	2.65151	0.0080132	0.195579	817.744	958.264	1912.11	1046.12	1154.7	888.004	1370.98
FBgn0014863	Mlp84B	47.4828	-1.64288	0.619692	-2.65111	0.00802267	0.195579	78.882	83.1208	15.8901	47.4284	0	81.0014	21.1062
FBgn0040493	grsm	209.507	-0.767458	0.289248	-2.65328	0.00797131	0.195579	236.646	277.861	112.29	191.256	145.063	257.253	149.536
FBgn0265180	CG44245	1259.31	-1.11119	0.418848	-2.65297	0.00797864	0.195579	1369.92	1464.11	312.505	1007.18	644.079	1417.02	654.588
FBgn0035676	ssp6	8.32148	5.58896	2.11168	2.64669	0.00812832	0.196426	0	0	27.5428	7.32634	11.605	0	15.4914
FBgn0038723	CG6195	159.14	-0.770509	0.290918	-2.64854	0.00808398	0.196426	194.576	168.616	82.6284	106.039	150.865	181.596	113.178
FBgn0259937	Nop60B	578.7	-0.811363	0.306452	-2.6476	0.00810647	0.196426	709.938	687.527	276.487	500.119	417.781	698.733	398.129
FBgn0022787	Hel89B	62.2025	-0.871368	0.329643	-2.64337	0.00820864	0.197337	97.2878	96.1826	58.2636	52.4412	40.6176	96.7352	50.4408
FBgn0031089	CG9572	27.6493	-2.11089	0.799429	-2.6405	0.00827835	0.197337	70.9938	23.7488	16.9494	9.63992	0	47.3713	8.86311
FBgn0038967	CG13847	5.77949	-3.67271	1.38955	-2.64309	0.00821536	0.197337	10.5176	14.2493	0	1.54239	0	12.3834	0.514129
FBgn0039928	Cals	527.78	0.945571	0.358138	2.64024	0.00828467	0.197337	228.758	353.857	690.689	545.234	446.793	291.307	560.905
FBgn0085384	CG34355	12.8099	4.27188	1.61743	2.64115	0.00826263	0.197337	0	1.18744	28.6021	14.2671	0	0.59372	14.2897
FBgn0025634	CG13367	58.9945	-0.856754	0.32517	-2.63479	0.00841905	0.199964	84.1408	74.8087	33.8988	52.8268	34.8151	79.4748	40.5136
FBgn0261403	sxc	215.056	0.864788	0.328511	2.63245	0.00847715	0.200771	115.694	119.931	191.74	279.558	150.865	117.813	207.388
FBgn0003396	shn	175.782	-0.827546	0.315211	-2.62538	0.00865534	0.201546	255.052	256.487	133.477	160.023	133.458	255.769	142.319
FBgn0004391	shtd	27.4947	-1.35186	0.51461	-2.62696	0.00861516	0.201546	39.441	54.6222	19.0681	18.8942	17.4075	47.0316	18.4566
FBgn0029906	xit	21.6884	-1.76961	0.673346	-2.62809	0.00858657	0.201546	44.6998	43.9353	7.41537	21.979	0	44.3175	9.79813
FBgn0030991	CG7453	105.259	-0.686816	0.261555	-2.6259	0.00864214	0.201546	181.429	128.243	92.1625	90.2297	110.248	154.836	97.5466
FBgn0032135	GlcAT-S	49.4699	1.34267	0.510637	2.6294	0.00855356	0.201546	13.147	18.999	48.7296	47.0428	17.4075	16.073	37.7266
FBgn0270928	VAChT	13.6386	5.1178	1.94919	2.6256	0.00864963	0.201546	0	1.18744	68.857	13.8815	0	0.59372	27.5795
FBgn0027491	Cdk5alpha	24.8512	2.90584	1.10752	2.62373	0.00869718	0.201954	10.5176	3.56232	108.053	13.4959	23.21	7.03996	48.2528
FBgn0026084	cib	1330.71	1.01142	0.386299	2.61823	0.00883871	0.204669	967.62	884.642	2847.5	1363.86	1375.2	926.131	1862.18
FBgn0020767	Spred	91.6172	1.10052	0.421821	2.60898	0.00908125	0.20586	34.1822	56.9971	133.477	103.34	46.4201	45.5896	94.4122
FBgn0027599	CG2790	64.9564	-0.868913	0.332912	-2.61004	0.00905313	0.20586	97.2878	94.9951	47.6702	52.8268	63.8276	96.1415	54.7749
FBgn0032402	CG14945	5.59201	5.08383	1.94562	2.61297	0.00897598	0.20586	0	0	13.7714	4.24157	17.4075	0	11.8068
FBgn0035945	CG5026	18.7551	-2.11358	0.8102	-2.60872	0.00908828	0.20586	26.294	59.372	11.6527	10.4111	5.80251	42.833	9.28878
FBgn0038108	CG7518	629.972	-1.02602	0.393295	-2.60878	0.00908652	0.20586	291.863	250.55	149.367	182.773	34.8151	271.207	122.318
FBgn0052441	CG32441	119.305	-0.622367	0.238457	-2.60997	0.009055	0.20586	120.952	111.619	70.9757	73.649	92.8402	116.286	79.155
FBgn0052695	CG32695	19.6503	1.97795	0.758749	2.60686	0.00913776	0.20586	10.5176	5.9372	36.0175	14.2671	52.2226	8.2274	34.1691
FBgn0262150	CG42876	44.1338	1.71523	0.656596	2.61231	0.00899315	0.20586	7.8882	36.8106	111.231	45.5004	81.2352	22.3494	79.3221
FBgn0262731	CG33941	33.7964	1.72555	0.660463	2.61265	0.00898443	0.20586	15.7764	7.12464	47.6702	31.6189	17.4075	11.4505	32.2322
FBgn0266521	stai	773.912	0.99661	0.382224	2.6074	0.00912334	0.20586	567.951	558.096	1755.32	707.185	899.389	563.024	1120.63
FBgn0034345	CG5174	452.059	0.695073	0.266973	2.60354	0.00922676	0.207303	202.464	317.046	427.973	410.275	446.793	259.755	428.347
FBgn0031751	CG9016	32.4017	-2.17871	0.837821	-2.60045	0.00931022	0.208614	52.588	53.4348	18.0088	8.86873	5.80251	53.0114	10.8933
FBgn0262869	Gfrl	15.2923	4.57106	1.7604	2.5966	0.00941504	0.210396	2.6294	0	52.9669	9.25433	0	1.3147	20.7404
FBgn0029629	eIF3g1	667.944	-0.651901	0.251255	-2.59458	0.00947061	0.210882	1051.76	792.022	525.432	513.615	748.524	921.891	595.857
FBgn0038808	Srp14	101.7	0.956903	0.368895	2.59397	0.00948753	0.210882	42.0704	73.6212	95.3405	94.4712	191.483	57.8458	127.098
FBgn0029676	HIP-R	420.929	-0.49551	0.191173	-2.59194	0.00954371	0.211565	720.456	450.04	377.125	437.267	411.978	585.248	408.79
FBgn0030466	CG15744	39.6179	-1.12645	0.434926	-2.58999	0.00959793	0.21176	73.6232	55.8096	25.4241	35.8605	17.4075	64.7164	26.2307
FBgn0030718	ND-20	534.138	-0.655432	0.253083	-2.58979	0.00960344	0.21176	365.487	374.043	193.859	277.63	226.298	369.765	232.596
FBgn0267525	asRNA:CR45865	12.6484	-2.36236	0.912564	-2.58871	0.00963373	0.211866	76.2526	17.8116	12.7121	4.62716	11.605	47.0321	9.64808
FBgn0000146	aub	6.92401	5.1848	2.01783	2.56949	0.0101847	0.212194	0	0	1.05934	5.78395	34.8151	0	13.8861
FBgn0004587	B52	776.304	-0.56698	0.219914	-2.57819	0.00993187	0.212194	1125.38	984.387	530.729	828.648	783.339	1054.89	714.239
FBgn0011763	Dp	143.302	0.885059	0.343423	2.57717	0.00996139	0.212194	107.805	113.994	133.477	231.358	266.916	110.9	210.583
FBgn0026749	Yippee	136.907	-0.750916	0.291677	-2.57448	0.0100391	0.212194	283.975	186.428	159.96	96.3992	179.878	235.202	145.412
FBgn0027654	jdp	27.5358	2.76685	1.07416	2.57582	0.0100002	0.212194	0	7.12464	60.3823	11.5679	11.605	3.56232	27.8517
FBgn0028573	prc	7.19535	5.10331	1.98574	2.56999	0.0101703	0.212194	0	0	14.8307	3.47037	17.4075	0	11.9029
FBgn0028687	Rpt1	503.008	-0.498216	0.192947	-2.58214	0.00981907	0.212194	652.091	569.971	434.329	425.313	435.188	611.031	431.61
FBgn0031882	Rab30	22.9674	2.3499	0.914429	2.5698	0.0101758	0.212194	13.147	1.18744	44.4922	18.1231	29.0126	7.16722	30.5426
FBgn0032997	CG17486	140.4	0.8725	0.338835	2.575	0.0100239	0.212194	97.2878	65.3092	138.773	137.658	168.273	81.2985	148.235
FBgn0034433	EndoB	28.5706	1.86652	0.723195	2.58094	0.00985316	0.212194	15.7764	8.31208	54.0263	30.4622	40.6176	12.0442	41.702
FBgn0037664	CG8420	19.1977	-2.98073	1.15515	-2.58038	0.00986924	0.212194	10.5176	4.74976	1.05934	0.771194	0	7.63368	0.610178
FBgn0038964	Nop56	344.894	-0.682251	0.263782	-2.58642	0.0096979	0.212194	373.375	390.668	206.571	246.782	272.718	382.021	242.024
FBgn0039335	Vps33B	27.4084	1.56286	0.607532	2.57247	0.0100976	0.212194	5.2588	13.0618	29.6615	28.5342	34.8151	9.16032	31.0036
FBgn0040383	CG5254	147.292	0.985819	0.381182	2.58622	0.00970355	0.212194	65.735	109.244	258.479	126.476	139.26	87.4897	174.738
FBgn0051051	CG31051	6.56243	5.16743	2.00078	2.5827	0.00980299	0.212194	0	0	26.4835	5.78395	0	0	10.7558
FBgn0052029	Cpr66D	11.2497	-2.50698	0.972906	-2.5768	0.00997206	0.212194	31.5528	7.12464	2.11868	4.62716	0	19.3387	2.24861
FBgn0052190	NUCB1	183.33	0.851257	0.330308	2.57716	0.00996147	0.212194	120.952	155.555	355.938	179.303	214.693	138.253	249.978
FBgn0061197	salto	17.5026	-2.90471	1.12712	-2.5771	0.00996336	0.212194	55.2174	24.9362	9.53405	1.54239	5.80251	40.0768	5.62632
FBgn0085360	CG34331	58.8712	1.26394	0.491415	2.57204	0.0101102	0.212194	52.588	42.7478	162.079	69.0219	110.248	47.6679	113.783
FBgn0261396	Rpn3	286.063	-0.644926	0.25071	-2.5724	0.0100996	0.212194	270.828	390.668	213.986	242.155	162.47	330.748	206.204
FBgn0262107	asRNA:CR42860	13.1555	-2.0927	0.812888	-2.5744	0.0100414	0.212194	28.9234	30.8734	5.29669	10.4111	0	29.8984	5.23594
FBgn0029067	Dd	123.876	1.0284	0.400734	2.5663	0.010279	0.213091	44.6998	90.2454	153.604	134.188	139.26	67.4726	142.351
FBgn0285926	Imp	1015.83	-0.988459	0.385114	-2.56666	0.0102683	0.213091	515.363	454.789	271.191	286.884	156.668	485.076	238.248
FBgn0039969	Fis1	240.44	0.856055	0.333703	2.56532	0.010308	0.21316	147.246	123.494	295.555	185.087	255.311	135.37	245.318
FBgn0030744	CG9992	28.891	1.44443	0.563595	2.56288	0.0103808	0.213685	13.147	14.2493	47.6702	37.4029	17.4075	13.6981	34.1602
FBgn0033000	CG14464	157.204	1.25752	0.491031	2.56097	0.010438	0.213685	55.2174	92.6203	165.257	114.522	278.521	73.9188	186.1
FBgn0033439	CG1773	66.9852	1.6874	0.658996	2.56057	0.0104502	0.213685	13.147	56.9971	208.69	60.5387	81.2352	35.072	116.821
FBgn0036300	Pmm2	31.2803	1.73596	0.678028	2.56031	0.010458	0.213685	5.2588	30.8734	60.3823	26.2206	127.655	18.0661	71.4194
FBgn0263380	lncRNA:CR43432	67.0291	1.11134	0.434087	2.56018	0.0104619	0.213685	34.1822	42.7478	101.697	64.3947	92.8402	38.465	86.3105
FBgn0000659	fkh	28.4351	2.58543	1.01028	2.55914	0.0104933	0.2138	7.8882	11.8744	36.0175	130.717	5.80251	9.8813	57.5125
FBgn0026431	Grip75	25.675	1.40136	0.548238	2.55611	0.010585	0.215143	15.7764	13.0618	36.0175	34.7037	46.4201	14.4191	39.0471
FBgn0029659	CG16782	16.2129	-3.2049	1.255	-2.5537	0.0106584	0.216106	5.2588	10.687	1.05934	0.771194	0	7.97288	0.610178
FBgn0002872	mu2	7.24906	2.81751	1.10485	2.55012	0.0107686	0.216255	2.6294	2.37488	27.5428	11.1823	11.605	2.50214	16.7767
FBgn0010385	Def	382.567	1.29186	0.506595	2.55008	0.0107698	0.216255	294.493	303.984	1173.75	230.201	800.747	299.239	734.898
FBgn0032899	CG9338	110.575	1.34152	0.525848	2.55115	0.0107367	0.216255	57.8468	85.4956	286.021	106.425	156.668	71.6712	183.038
FBgn0039844	CG1607	14.4396	2.30229	0.902373	2.55137	0.0107301	0.216255	2.6294	9.49951	42.3735	15.8095	46.4201	6.06446	34.8677
FBgn0033942	Cpr51A	27.9029	2.60313	1.02319	2.54414	0.0109546	0.219436	5.2588	3.56232	43.4329	14.2671	17.4075	4.41056	25.0358
FBgn0040005	CG17883	121.621	1.0715	0.421794	2.54034	0.0110745	0.221303	60.4762	85.4956	149.367	148.84	174.075	72.9859	157.428
FBgn0035612	frm	13.9483	2.48873	0.980032	2.53944	0.011103	0.221342	7.8882	5.9372	52.9669	8.86873	58.0251	6.9127	39.9536
FBgn0039305	CG11858	105.817	1.15873	0.456669	2.53736	0.0111691	0.222127	42.0704	75.9961	90.0438	84.8313	266.916	59.0333	147.264
FBgn0275436	PheRS-m	609.908	-0.845598	0.333377	-2.53646	0.0111979	0.222167	1306.81	930.952	331.573	632.379	934.204	1118.88	632.719
FBgn0036759	CG5577	17.6518	1.95199	0.770051	2.53489	0.0112483	0.222636	7.8882	14.2493	49.7889	15.8095	81.2352	11.0687	48.9445
FBgn0036640	nxf2	6.84589	4.12794	1.63379	2.52661	0.0115169	0.226872	0	1.18744	15.8901	8.48313	23.21	0.59372	15.8611
FBgn0039955	CG41099	65.9176	1.04653	0.414107	2.5272	0.0114977	0.226872	42.0704	41.5604	76.2724	70.5642	133.458	41.8154	93.4315
FBgn0035028	Start1	45.5914	1.49666	0.592715	2.52509	0.0115669	0.227319	42.0704	21.3739	63.5603	36.6317	185.68	31.7222	95.2908
FBgn0020299	stumps	14.6174	1.94286	0.770205	2.52252	0.0116516	0.228088	5.2588	5.9372	28.6021	22.3646	5.80251	5.598	18.9231
FBgn0038839	Ktl	15.5594	5.13171	2.03458	2.52224	0.0116609	0.228088	0	1.18744	59.323	3.85597	23.21	0.59372	28.7963
FBgn0041789	Pax	144.309	0.779269	0.309257	2.51981	0.0117417	0.229129	68.3644	135.368	185.384	178.917	179.878	101.866	181.393
FBgn0004926	eIF2beta	664.115	-0.679023	0.26967	-2.51798	0.011803	0.229371	878.22	735.025	404.667	523.255	597.659	806.622	508.527
FBgn0011211	blw	4194.03	-0.730751	0.290613	-2.51451	0.0119197	0.229371	4225.45	3865.12	1431.17	3243.64	2640.14	4045.28	2438.32
FBgn0027609	morgue	49.0947	-0.881781	0.350454	-2.51611	0.0118658	0.229371	81.5114	77.1836	37.0769	53.2124	23.21	79.3475	37.8331
FBgn0029994	Ldsdh1	17.4106	2.32578	0.924235	2.51644	0.0118549	0.229371	0	8.31208	36.0175	26.9918	5.80251	4.15604	22.9373
FBgn0039480	Cpr97Ea	36.0855	-2.13721	0.849359	-2.51626	0.0118609	0.229371	89.3996	49.8725	24.3648	13.1103	5.80251	69.636	14.4259
FBgn0039488	CG6066	51.1918	-1.15467	0.459152	-2.51478	0.0119106	0.229371	92.029	91.4328	42.3735	58.2251	0	91.7309	33.5329
FBgn0261239	Hr39	81.6113	1.21893	0.484927	2.51365	0.011949	0.229405	18.4058	43.9353	95.3405	67.4795	63.8276	31.1705	75.5492
FBgn0035070	CG3650	36.8578	1.90045	0.756661	2.51162	0.0120178	0.229665	28.9234	23.7488	146.189	44.3436	104.445	26.3361	98.3259
FBgn0043456	Ndf	363.508	-0.670613	0.26695	-2.51213	0.0120006	0.229665	536.398	594.907	284.962	396.008	394.571	565.652	358.514
FBgn0027084	LysRS	397.45	-0.827993	0.329867	-2.51008	0.0120704	0.23014	562.692	420.354	188.562	357.834	278.521	491.523	274.972
FBgn0037680	pasi2	67.6355	1.72608	0.688339	2.5076	0.0121553	0.231228	28.9234	34.4357	184.325	58.2251	69.6301	31.6796	104.06
FBgn0031107	HERC2	37.3603	-1.30569	0.52123	-2.50503	0.0122443	0.232389	78.882	62.9343	33.8988	35.4749	0	70.9082	23.1246
FBgn0002931	net	73.6751	1.34997	0.539421	2.50262	0.0123277	0.233439	34.1822	47.4976	67.7977	121.849	133.458	40.8399	107.701
FBgn0039508	CG3368	96.8921	-1.08019	0.431919	-2.50091	0.0123874	0.234038	99.9172	157.929	42.3735	92.9289	34.8151	128.923	56.7058
FBgn0015575	alpha-Est7	114.794	1.19536	0.478507	2.49811	0.0124856	0.235239	89.3996	113.994	365.472	151.925	179.878	101.697	232.425
FBgn0083972	CG34136	249.102	1.17789	0.471631	2.49749	0.0125076	0.235239	181.429	223.239	645.137	207.066	533.831	202.334	462.011
FBgn0034564	CG9344	132.426	-0.989856	0.396737	-2.495	0.0125959	0.235832	126.211	138.93	41.3142	79.8186	87.0377	132.571	69.3901
FBgn0052281	CG32281	25.6741	1.91581	0.767835	2.49508	0.0125929	0.235832	2.6294	8.31208	12.7121	27.763	34.8151	5.47074	25.0967
FBgn0003964	usp	68.6301	1.13995	0.457448	2.49199	0.0127031	0.237306	49.9586	24.9362	50.8483	72.8778	133.458	37.4474	85.7279
FBgn0022361	Pur-alpha	247.869	1.02919	0.413447	2.48928	0.0128001	0.238047	115.694	161.492	295.555	280.715	278.521	138.593	284.93
FBgn0037551	Arl8	131.49	1.10925	0.445468	2.49008	0.0127715	0.238047	92.029	89.058	306.149	131.489	139.26	90.5435	192.299
FBgn0260798	Gprk1	195.231	0.825549	0.331801	2.48808	0.0128434	0.238319	110.435	154.367	305.09	226.731	162.47	132.401	231.43
FBgn0263832	Rcd5	130.406	-0.927958	0.373107	-2.48711	0.0128785	0.238439	252.422	150.805	126.061	122.234	40.6176	201.614	96.3044
FBgn0024293	Spn43Ab	28.005	1.49793	0.602507	2.48616	0.0129129	0.238504	23.6646	27.3111	108.053	45.1148	63.8276	25.4879	72.3317
FBgn0035462	IntS10	25.2668	1.9777	0.795716	2.48543	0.0129394	0.238504	5.2588	16.6242	14.8307	32.0045	110.248	10.9415	52.361
FBgn0031403	CG15387	168.351	0.762865	0.307089	2.48418	0.012985	0.238814	73.6232	136.556	228.817	160.023	156.668	105.089	181.836
FBgn0004919	gol	162.211	0.857781	0.345744	2.48097	0.0131026	0.23939	123.582	146.055	187.503	231.358	342.348	134.818	253.736
FBgn0022023	eIF3h	923.046	-0.416951	0.168958	-2.46778	0.0135956	0.23939	1254.22	1012.89	877.132	802.042	864.574	1133.55	847.916
FBgn0025352	Mtpbeta	510.05	-0.631563	0.255443	-2.47242	0.0134201	0.23939	686.274	590.157	360.175	500.89	353.953	638.215	405.006
FBgn0026250	eIF1A	908.518	-0.393076	0.159048	-2.47144	0.0134572	0.23939	1106.98	1005.76	807.216	730.706	905.192	1056.37	814.371
FBgn0030603	CG5541	14.6217	2.02488	0.819102	2.47207	0.0134332	0.23939	5.2588	5.9372	32.8395	14.6527	23.21	5.598	23.5674
FBgn0031250	Ent1	38.8742	1.19369	0.481508	2.47906	0.013173	0.23939	26.294	27.3111	79.4504	38.5597	75.4326	26.8026	64.4809
FBgn0032208	Ufd4	208.442	-0.800273	0.322717	-2.4798	0.0131456	0.23939	318.158	246.987	101.697	212.464	168.273	282.572	160.811
FBgn0032640	Sgt	268.795	-0.564478	0.228665	-2.46857	0.0135652	0.23939	357.599	324.171	189.622	273.388	214.693	340.885	225.901
FBgn0033287	CG8701	14.2038	-2.9998	1.21495	-2.46907	0.0135465	0.23939	18.4058	14.2493	2.11868	1.15679	5.80251	16.3275	3.02599
FBgn0033639	CG9003	222.691	0.729709	0.294691	2.47618	0.0132795	0.23939	202.464	174.554	437.507	217.477	272.718	188.509	309.234
FBgn0034272	Ir54a	11.9474	3.07011	1.24078	2.47434	0.0133481	0.23939	2.6294	3.56232	16.9494	9.25433	63.8276	3.09586	30.0105
FBgn0035538	DopEcR	19.8872	3.38696	1.36798	2.47589	0.0132905	0.23939	5.2588	3.56232	106.993	18.1231	5.80251	4.41056	43.6396
FBgn0036319	Ent3	7.99206	5.7313	2.31308	2.47778	0.0132202	0.23939	0	0	41.3142	8.48313	0	0	16.5991
FBgn0037515	Sp7	13.7141	2.83396	1.14755	2.46958	0.0135273	0.23939	5.2588	1.18744	31.7802	15.4239	5.80251	3.22312	17.6689
FBgn0037913	fabp	1224.59	1.04721	0.42455	2.46663	0.0136391	0.23939	849.296	1040.2	2854.92	1031.47	1978.66	944.747	1955.02
FBgn0038788	Sirt2	32.6649	1.50762	0.609726	2.47262	0.0134126	0.23939	21.0352	8.31208	59.323	28.9198	17.4075	14.6736	35.2168
FBgn0039065	Rad60	10.5064	2.41154	0.974604	2.47437	0.013347	0.23939	7.8882	1.18744	21.1868	16.1951	23.21	4.53782	20.1973
FBgn0050359	Mal-A5	233.398	0.936077	0.379455	2.4669	0.013629	0.23939	194.576	229.176	577.34	289.583	348.151	211.876	405.025
FBgn0051144	asRNA:CR31144	19.4121	-2.57922	1.04293	-2.47306	0.013396	0.23939	39.441	68.8715	12.7121	10.4111	0	54.1562	7.70773
FBgn0259178	5PtaseI	33.2703	1.86278	0.75528	2.46635	0.0136498	0.23939	5.2588	16.6242	34.9582	22.3646	87.0377	10.9415	48.1202
FBgn0265512	mlt	42.853	-1.87816	0.761082	-2.46775	0.0135963	0.23939	134.099	71.2464	36.0175	19.2798	29.0126	102.673	28.1033
FBgn0000212	brm	154.54	-0.816795	0.331709	-2.46239	0.0138016	0.239887	326.046	184.053	99.5778	153.853	191.483	255.049	148.305
FBgn0030731	Mfe2	191.194	0.718984	0.291888	2.46322	0.0137697	0.239887	105.176	223.239	340.048	239.841	249.508	164.207	276.466
FBgn0033581	CG12391	98.992	-0.727424	0.295462	-2.46199	0.0138169	0.239887	181.429	127.056	82.6284	107.967	69.6301	154.242	86.7419
FBgn0037354	CG12171	41.7364	1.20521	0.489472	2.46227	0.0138059	0.239887	21.0352	13.0618	34.9582	37.4029	40.6176	17.0485	37.6596
FBgn0054039	CG34039	36.8437	-1.17108	0.47569	-2.46185	0.0138224	0.239887	52.588	51.0599	25.4241	22.7502	17.4075	51.824	21.8606
FBgn0028412	Mst33A	6.80943	-4.86616	1.979	-2.4589	0.0139363	0.24136	15.7764	0	0	0	0	7.8882	0
FBgn0010583	dock	101.968	1.12745	0.458817	2.4573	0.0139986	0.241657	44.6998	62.9343	173.732	102.569	69.6301	53.817	115.31
FBgn0267726	CG46059	14.1417	-3.83484	1.5608	-2.45696	0.0140116	0.241657	28.9234	13.0618	2.11868	1.15679	0	20.9926	1.09182
FBgn0032603	CG17928	14.2196	2.29109	0.934064	2.45282	0.0141741	0.243953	2.6294	9.49951	41.3142	19.2798	40.6176	6.06446	33.7372
FBgn0000524	dx	55.5436	1.38259	0.564009	2.45136	0.0142317	0.244439	10.5176	34.4357	52.9669	72.1066	63.8276	22.4767	62.9671
FBgn0036842	Ugt316A1	40.7341	1.34842	0.550238	2.45061	0.0142616	0.244447	15.7764	22.5613	50.8483	48.9708	52.2226	19.1689	50.6806
FBgn0035270	CG13933	30.5419	1.57757	0.644282	2.44857	0.0143424	0.245326	5.2588	17.8116	15.8901	47.814	58.0251	11.5352	40.5764
FBgn0259785	pzg	243.984	-0.764596	0.312484	-2.44683	0.0144118	0.246006	368.116	337.233	171.613	285.727	139.26	352.674	198.867
FBgn0001961	Arpc1	249.403	0.682168	0.280374	2.43307	0.0149716	0.248918	118.323	224.426	263.775	244.854	365.558	171.375	291.396
FBgn0010247	Parp	146.504	0.642698	0.264124	2.43332	0.0149611	0.248918	81.5114	144.868	167.376	188.557	203.088	113.19	186.34
FBgn0013764	Chi	84.4453	-1.12258	0.460746	-2.43645	0.0148322	0.248918	107.805	138.93	61.4416	80.2042	5.80251	123.368	49.1494
FBgn0025809	Paf-AHalpha	196.334	0.687101	0.282292	2.43401	0.0149328	0.248918	155.135	193.553	295.555	209.379	377.163	174.344	294.033
FBgn0033919	CG8547	198.37	-0.789129	0.323897	-2.43636	0.014836	0.248918	404.928	288.548	157.841	205.138	249.508	346.738	204.162
FBgn0036926	CG7646	72.6657	1.73627	0.711656	2.43977	0.0146968	0.248918	26.294	30.8734	186.444	38.5597	58.0251	28.5837	94.3428
FBgn0038953	CG18596	22.5175	1.74683	0.717169	2.43573	0.014862	0.248918	2.6294	11.8744	19.0681	21.979	58.0251	7.2519	33.0241
FBgn0039273	shams	45.9226	1.59039	0.653526	2.43355	0.0149516	0.248918	5.2588	24.9362	87.9251	38.5597	11.605	15.0975	46.0299
FBgn0040395	Unc-76	118.364	1.08183	0.443157	2.44118	0.0146392	0.248918	52.588	105.682	230.936	134.959	145.063	79.1351	170.319
FBgn0040928	CR15345	14.3568	2.71717	1.11329	2.44068	0.0146598	0.248918	0	5.9372	23.3055	20.8222	29.0126	2.9686	24.3801
FBgn0050083	CG30083	25.0897	1.63798	0.672782	2.43464	0.0149066	0.248918	15.7764	15.4367	47.6702	39.7165	63.8276	15.6066	50.4048
FBgn0052446	Atox1	99.6465	1.05488	0.433481	2.43351	0.0149533	0.248918	47.3292	70.0589	182.206	87.1449	98.6427	58.6941	122.665
FBgn0262362	CG43060	256.41	1.20723	0.495141	2.43816	0.0147624	0.248918	231.387	200.677	733.062	215.934	551.239	216.032	500.078
FBgn0025630	Rtca	88.7962	-1.04261	0.429434	-2.42786	0.0151883	0.24957	163.023	98.5575	45.5516	83.2889	52.2226	130.79	60.3544
FBgn0027575	GABA-B-R2	14.3788	4.17815	1.72218	2.42608	0.0152629	0.24957	2.6294	0	37.0769	8.86873	0	1.3147	15.3152
FBgn0027600	obst-B	34.428	1.59094	0.65509	2.42859	0.0151578	0.24957	13.147	13.0618	50.8483	25.4494	46.4201	13.1044	40.9059
FBgn0036932	CG14184	63.5537	1.11457	0.458985	2.42834	0.0151681	0.24957	13.147	39.1855	72.035	68.2507	29.0126	26.1663	56.4327
FBgn0037374	jagn	231.676	0.929915	0.383096	2.42737	0.0152087	0.24957	131.47	129.431	149.367	280.329	330.743	130.45	253.48
FBgn0037578	CG9601	34.4665	-1.05065	0.433141	-2.42565	0.015281	0.24957	70.9938	41.5604	27.5428	27.763	17.4075	56.2771	24.2378
FBgn0041191	Rheb	93.5703	0.792453	0.326662	2.42591	0.0152699	0.24957	49.9586	71.2464	112.29	106.039	104.445	60.6025	107.591
FBgn0262808	CG43179	28.6087	1.90735	0.786285	2.42577	0.0152758	0.24957	5.2588	17.8116	47.6702	17.7375	87.0377	11.5352	50.8151
FBgn0283659	THG	24.8446	1.74345	0.717505	2.42988	0.0151038	0.24957	2.6294	11.8744	15.8901	35.0893	34.8151	7.2519	28.5982
FBgn0000307	chif	80.2479	-0.910837	0.375977	-2.42259	0.0154104	0.25119	189.317	109.244	83.6878	85.9881	52.2226	149.281	73.9662
FBgn0031268	cold	75.6529	1.56128	0.644904	2.42096	0.0154797	0.251334	23.6646	39.1855	126.061	84.0601	69.6301	31.4251	93.2505
FBgn0036451	CG9425	450.033	-0.627724	0.25925	-2.4213	0.0154649	0.251334	539.027	580.658	386.659	448.449	208.89	559.843	347.999
FBgn0035578	CG13707	195.261	1.12749	0.46641	2.41739	0.0156323	0.25208	115.694	208.989	456.575	193.184	435.188	162.341	361.649
FBgn0037933	Ho	276.973	0.655699	0.271349	2.41644	0.0156731	0.25208	194.576	230.363	407.845	249.867	365.558	212.469	341.09
FBgn0039154	Npc2f	13.1246	2.66559	1.10254	2.41769	0.0156195	0.25208	5.2588	1.18744	27.5428	7.32634	17.4075	3.22312	17.4256
FBgn0039682	Obp99c	1314.5	0.970399	0.401575	2.41648	0.0156712	0.25208	1151.68	972.513	2845.38	1048.44	2355.82	1062.1	2083.21
FBgn0085235	CG34206	51.9868	1.76887	0.732045	2.41634	0.0156773	0.25208	7.8882	35.6232	99.5778	47.0428	92.8402	21.7557	79.8203
FBgn0035988	CG3982	13.2298	-2.81451	1.16592	-2.41398	0.0157791	0.252254	31.5528	36.8106	7.41537	4.62716	0	34.1817	4.01418
FBgn0036734	CG7564	99.4038	-0.828017	0.342996	-2.41407	0.0157752	0.252254	186.687	144.868	91.1031	111.052	58.0251	165.778	86.7267
FBgn0040732	CG16926	784.588	1.10128	0.456084	2.41465	0.0157504	0.252254	654.721	577.096	2047.7	756.927	1154.7	615.908	1319.78
FBgn0013749	Arf102F	133.888	0.921968	0.383005	2.4072	0.0160754	0.252618	81.5114	71.2464	199.156	120.692	98.6427	76.3789	139.497
FBgn0028689	Rpn6	529.259	-0.484576	0.200854	-2.41258	0.0158399	0.252618	746.75	587.782	493.652	477.369	440.991	667.266	470.671
FBgn0030724	Nipsnap	115.282	0.993626	0.41223	2.41037	0.0159363	0.252618	81.5114	85.4956	161.019	129.175	226.298	83.5035	172.164
FBgn0031049	Sec61gamma	277.39	0.798732	0.331749	2.40764	0.016056	0.252618	197.205	157.929	432.21	238.299	237.903	177.567	302.804
FBgn0033915	CG8485	75.8814	-1.17907	0.489419	-2.40913	0.0159904	0.252618	152.505	83.1208	64.6197	60.5387	11.605	117.813	45.5878
FBgn0052262	CG32262	9.55645	-3.65553	1.51829	-2.40766	0.0160551	0.252618	28.9234	4.74976	0	2.31358	0	16.8366	0.771194
FBgn0259740	CG42394	84.8947	1.04729	0.434851	2.40838	0.0160233	0.252618	42.0704	77.1836	175.85	76.3482	133.458	59.627	128.552
FBgn0262714	Sap130	44.3603	-1.33672	0.554998	-2.40851	0.0160178	0.252618	94.6584	77.1836	15.8901	57.8395	17.4075	85.921	30.3791
FBgn0264607	CaMKII	256.015	0.933755	0.3877	2.40845	0.0160205	0.252618	134.099	175.741	419.498	275.702	179.878	154.92	291.693
FBgn0036255	Atg12	15.0041	2.19726	0.913334	2.40575	0.0161391	0.253141	10.5176	1.18744	22.2461	14.6527	34.8151	5.85252	23.9046
FBgn0267348	LanB2	402.299	-0.646626	0.269946	-2.39539	0.0166026	0.259919	654.721	584.22	261.657	428.784	522.226	619.47	404.222
FBgn0034634	CG10494	10.8987	2.71334	1.13339	2.39401	0.0166653	0.26041	5.2588	1.18744	10.5934	11.9535	40.6176	3.22312	21.0548
FBgn0085387	shakB	187.032	1.96003	0.819703	2.39115	0.0167956	0.261955	68.3644	23.7488	347.463	82.1321	92.8402	46.0566	174.145
FBgn0033504	CAP	263.246	-0.753297	0.315274	-2.38934	0.0168786	0.262716	173.54	186.428	100.637	125.319	81.2352	179.984	102.397
FBgn0036988	CG5262	17.5994	1.51385	0.633752	2.38871	0.0169076	0.262716	13.147	8.31208	38.1362	25.835	17.4075	10.7295	27.1262
FBgn0033038	CG7791	80.8471	-1.15558	0.484098	-2.38708	0.0169826	0.263389	157.764	86.6831	44.4922	70.1786	40.6176	122.224	51.7628
FBgn0005671	Vha55	249.69	0.525761	0.220391	2.38559	0.0170519	0.263971	160.393	224.426	324.158	259.892	255.311	192.41	279.787
FBgn0034479	CG8654	21.2149	2.21125	0.927278	2.38467	0.0170946	0.264141	7.8882	5.9372	49.7889	22.7502	17.4075	6.9127	29.9822
FBgn0002643	mam	330.959	-0.660354	0.2773	-2.38137	0.0172483	0.26486	370.746	393.042	253.182	282.257	162.47	381.894	232.636
FBgn0016126	CaMKI	141.083	1.11325	0.467394	2.38181	0.0172276	0.26486	136.729	87.8705	419.498	130.332	162.47	112.3	237.433
FBgn0029176	eEF1gamma	1620.46	-0.467048	0.196173	-2.3808	0.017275	0.26486	1953.64	1746.72	1037.09	1427.87	1578.28	1850.18	1347.75
FBgn0038197	foxo	93.6172	0.835365	0.350956	2.38026	0.0173004	0.26486	49.9586	60.5594	126.061	89.0729	75.4326	55.259	96.8556
FBgn0063492	GstE8	9.94114	-1.96821	0.826891	-2.38026	0.0173005	0.26486	23.6646	13.0618	7.41537	2.31358	5.80251	18.3632	5.17715
FBgn0028552	gammaSnap1	26.2272	1.46445	0.616028	2.37724	0.0174425	0.265082	7.8882	16.6242	34.9582	24.6782	63.8276	12.2562	41.1547
FBgn0039593	Sid	60.8212	1.27688	0.537053	2.37757	0.0174269	0.265082	49.9586	45.1227	137.714	43.9581	179.878	47.5407	120.517
FBgn0050148	CG30148	5.60033	4.52136	1.90072	2.37876	0.0173709	0.265082	0	0	15.8901	3.85597	0	0	6.58202
FBgn0265767	zyd	9.46463	3.46902	1.45859	2.37834	0.017391	0.265082	2.6294	1.18744	41.3142	7.32634	5.80251	1.90842	18.1477
FBgn0002069	AspRS	487.637	-0.58158	0.24504	-2.37341	0.0176248	0.266139	517.992	542.66	278.606	313.876	522.226	530.326	371.569
FBgn0010520	Bka	48.875	1.20435	0.507101	2.37497	0.0175503	0.266139	31.5528	20.1865	51.9076	47.0428	87.0377	25.8696	61.996
FBgn0010551	Phb2	1308.87	-0.762423	0.321279	-2.37309	0.0176401	0.266139	1664.41	1410.68	528.61	1031.47	1177.91	1537.54	912.664
FBgn0027111	miple1	225.342	2.81627	1.18633	2.37393	0.0175997	0.266139	97.2878	65.3092	1458.71	95.2424	156.668	81.2985	570.207
FBgn0003514	sqh	414.071	0.521883	0.220025	2.37193	0.0176956	0.266491	226.128	292.11	327.336	372.101	458.398	259.119	385.945
FBgn0015288	RpL22	35.6653	-1.02198	0.431362	-2.3692	0.0178265	0.266947	55.2174	51.0599	27.5428	20.8222	40.6176	53.1387	29.6609
FBgn0026428	HDAC6	67.5696	-0.980968	0.413944	-2.36981	0.0177973	0.266947	115.694	144.868	56.145	82.9033	52.2226	130.281	63.757
FBgn0032689	CG10413	59.5762	1.11445	0.470663	2.36783	0.0178925	0.266947	49.9586	33.2483	104.875	79.433	75.4326	41.6035	86.58
FBgn0038296	CG6752	5.6926	3.87152	1.6351	2.36776	0.0178962	0.266947	0	1.18744	13.7714	8.09754	17.4075	0.59372	13.0922
FBgn0039667	CG2010	151.421	-1.25716	0.530978	-2.36764	0.017902	0.266947	168.282	249.362	26.4835	105.268	145.063	208.822	92.2714
FBgn0086707	ncm	121.986	-0.989793	0.418111	-2.3673	0.0179185	0.266947	136.729	200.677	92.1625	109.51	34.8151	168.703	78.829
FBgn0010041	GstD5	14.0996	-2.53492	1.07278	-2.36295	0.01813	0.267268	13.147	9.49951	2.11868	1.15679	5.80251	11.3233	3.02599
FBgn0010333	Rac1	309.781	0.496308	0.209979	2.36361	0.0180978	0.267268	228.758	287.36	435.388	342.024	307.533	258.059	361.649
FBgn0029693	CG6379	46.3689	0.926384	0.391844	2.36416	0.0180709	0.267268	26.294	24.9362	40.2549	50.1276	63.8276	25.6151	51.4034
FBgn0064227	Rdh	47.1718	-1.23716	0.52358	-2.36289	0.0181329	0.267268	73.6232	78.371	24.3648	35.4749	40.6176	75.9971	33.4858
FBgn0260970	Ubr3	246.293	-0.65645	0.277545	-2.3652	0.0180204	0.267268	328.675	261.237	148.307	193.955	232.1	294.956	191.454
FBgn0261276	Opa1	215.234	-0.676747	0.286065	-2.36571	0.0179957	0.267268	281.346	232.738	136.655	173.133	174.075	257.042	161.288
FBgn0003882	tub	34.4722	1.35825	0.5755	2.36012	0.0182688	0.267281	23.6646	23.7488	52.9669	30.8478	121.853	23.7067	68.5558
FBgn0011785	BRWD3	51.8932	-0.973608	0.412685	-2.35921	0.0183141	0.267281	131.47	71.2464	41.3142	57.4539	52.2226	101.358	50.3303
FBgn0032021	CG7781	35.8174	3.11767	1.32306	2.35641	0.0184526	0.267281	10.5176	5.9372	181.147	7.71194	17.4075	8.2274	68.7555
FBgn0034975	enok	69.2846	-1.15371	0.489854	-2.35522	0.0185118	0.267281	134.099	87.8705	48.7296	66.7083	17.4075	110.985	44.2818
FBgn0035791	CG8539	34.9037	1.43932	0.611113	2.35524	0.0185107	0.267281	21.0352	22.5613	94.2811	35.0893	46.4201	21.7983	58.5969
FBgn0036030	CG6767	1872.54	-0.777861	0.329951	-2.35751	0.018398	0.267281	2298.1	2181.33	825.225	1451.77	1659.52	2239.71	1312.17
FBgn0037754	CG8500	14.1319	2.95658	1.25402	2.35768	0.0183893	0.267281	0	5.9372	60.3823	11.5679	5.80251	2.9686	25.9176
FBgn0039737	CG7920	1823.28	-0.62055	0.263153	-2.35814	0.0183669	0.267281	2213.96	2062.58	1023.32	1761.41	1381	2138.27	1388.58
FBgn0040519	CG15219	9.67533	-3.41644	1.45013	-2.35595	0.0184752	0.267281	23.6646	8.31208	1.05934	1.92798	0	15.9883	0.995774
FBgn0052652	lncRNA:CR32652	17.2113	-3.40142	1.44263	-2.35779	0.0183843	0.267281	18.4058	23.7488	4.23735	0.771194	0	21.0773	1.66952
FBgn0087007	bbg	906.511	-1.01895	0.432613	-2.35535	0.0185055	0.267281	770.414	979.637	210.808	569.912	522.226	875.026	434.316
FBgn0264307	orb2	210.073	1.01133	0.429426	2.35506	0.0185196	0.267281	34.1822	49.8725	134.536	69.4074	40.6176	42.0273	81.5203
FBgn0030791	CG9132	76.3459	1.17888	0.501245	2.35191	0.0186772	0.269088	31.5528	48.685	145.129	78.6618	40.6176	40.1189	88.1363
FBgn0020391	Nrk	17.6316	3.38957	1.44226	2.35019	0.018764	0.269871	0	3.56232	49.7889	13.4959	0	1.78116	21.0949
FBgn0030892	CG7206	55.361	-1.0667	0.454873	-2.34506	0.0190242	0.2722	126.211	71.2464	30.7208	67.8651	29.0126	98.7288	42.5328
FBgn0035410	CG14964	55.8317	-1.12825	0.480908	-2.34607	0.0189724	0.2722	92.029	93.8077	38.1362	55.526	23.21	92.9184	38.9574
FBgn0086913	Rab26	6.34974	5.49402	2.34223	2.34564	0.0189945	0.2722	0	0	40.2549	1.92798	0	0	14.061
FBgn0014135	bnl	24.0086	-1.61091	0.687567	-2.34291	0.019134	0.272548	44.6998	18.999	10.5934	10.7967	5.80251	31.8494	9.0642
FBgn0030740	CG9917	54.6873	1.36306	0.582003	2.34202	0.0191796	0.272548	34.1822	24.9362	115.468	51.2844	52.2226	29.5592	72.9916
FBgn0031869	CG18304	310.685	-1.06707	0.455607	-2.34209	0.0191759	0.272548	234.017	324.171	60.3823	199.739	139.26	279.094	133.127
FBgn0039155	Kal1	195.634	-0.90646	0.386845	-2.34321	0.0191184	0.272548	276.087	292.11	75.213	164.65	237.903	284.099	159.255
FBgn0027578	Nepl21	94.3855	1.32381	0.565662	2.34028	0.0192695	0.272953	47.3292	83.1208	197.037	109.124	197.285	65.225	167.815
FBgn0032136	Apoltp	39.0543	1.14461	0.489473	2.33845	0.0193638	0.272953	31.5528	26.1237	69.9164	49.742	75.4326	28.8382	65.0303
FBgn0035600	Cyt-c1	1103.51	-0.732595	0.313239	-2.33878	0.0193471	0.272953	1233.19	1023.57	397.252	761.554	899.389	1128.38	686.065
FBgn0037730	CG9444	114.168	0.914779	0.390968	2.33978	0.0192951	0.272953	149.876	80.7459	282.843	144.213	214.693	115.311	213.917
FBgn0039889	Arl4	122.123	0.84194	0.360067	2.33829	0.0193723	0.272953	68.3644	80.7459	150.426	107.967	156.668	74.5551	138.354
FBgn0263454	asRNA:CR43477	8.0066	-2.88457	1.23506	-2.33557	0.0195136	0.274479	44.6998	4.74976	4.23735	3.47037	0	24.7248	2.56924
FBgn0259239	CG42337	8.87132	4.66459	1.99839	2.33418	0.0195865	0.275038	0	1.18744	59.323	0.771194	0	0.59372	20.0314
FBgn0030858	IntS2	56.2052	-0.833879	0.357355	-2.33347	0.0196234	0.275092	92.029	94.9951	64.6197	42.8013	52.2226	93.5121	53.2145
FBgn0026160	tna	719.711	-0.699117	0.300029	-2.33017	0.0197973	0.276585	1012.32	940.452	550.856	667.854	580.251	976.386	599.654
FBgn0030082	HP1b	92.7198	0.788071	0.338369	2.32903	0.0198574	0.276585	65.735	51.0599	77.3317	106.81	121.853	58.3975	101.998
FBgn0033540	Elp2	43.1782	-1.2676	0.544203	-2.32927	0.0198447	0.276585	73.6232	81.9333	18.0088	54.7548	11.605	77.7783	28.1228
FBgn0051606	CG31606	116.272	1.67351	0.718575	2.32893	0.019863	0.276585	52.588	94.9951	358.056	101.798	255.311	73.7916	238.388
FBgn0035802	Pura	69.524	-0.968415	0.416029	-2.32776	0.0199249	0.276797	155.135	115.182	48.7296	88.6873	63.8276	135.158	67.0815
FBgn0035900	ZC3H3	34.9448	-1.32786	0.570538	-2.32738	0.0199448	0.276797	86.7702	30.8734	18.0088	30.8478	11.605	58.8218	20.1538
FBgn0035106	rno	70.3035	-1.12255	0.48257	-2.3262	0.020008	0.27721	118.323	108.057	40.2549	80.5898	17.4075	113.19	46.0841
FBgn0266599	Hsc70-4	3394.8	-0.500927	0.215417	-2.32538	0.0200517	0.277354	4341.14	4194.04	2298.76	3213.56	3562.74	4267.59	3025.02
FBgn0034870	CG13559	5.18268	5.11686	2.20314	2.32253	0.0202043	0.277811	0	0	20.1274	6.94074	5.80251	0	10.9569
FBgn0034945	CG10904	40.2186	1.42475	0.613302	2.32308	0.0201746	0.277811	18.4058	23.7488	29.6615	43.1869	121.853	21.0773	64.9004
FBgn0035890	CG13667	18.85	1.8476	0.795054	2.32386	0.0201329	0.277811	15.7764	1.18744	23.3055	26.2206	23.21	8.48192	24.2454
FBgn0036239	Pop2	191.622	0.568276	0.244707	2.32227	0.0202184	0.277811	149.876	166.242	268.013	252.18	150.865	158.059	223.686
FBgn0004589	Eig71Eb	6.82801	4.49838	1.9426	2.31565	0.0205774	0.278146	0	0	16.9494	2.69918	0	0	6.54953
FBgn0014850	Eig71Ej	38.6194	1.70532	0.735904	2.31731	0.0204866	0.278146	26.294	15.4367	121.824	32.0045	40.6176	20.8654	64.8154
FBgn0030039	CG12123	10.4431	2.77506	1.19815	2.31612	0.0205518	0.278146	2.6294	1.18744	14.8307	12.3391	0	1.90842	9.05661
FBgn0032797	Hasp	8.37117	3.93273	1.69798	2.31612	0.0205519	0.278146	0	1.18744	10.5934	5.01276	29.0126	0.59372	14.8729
FBgn0034921	DCP1	53.2908	-1.03317	0.446033	-2.31636	0.0205384	0.278146	92.029	56.9971	21.1868	50.1276	29.0126	74.5131	33.4423
FBgn0035432	ZnT63C	99.5113	1.18827	0.512757	2.31742	0.0204809	0.278146	31.5528	71.2464	134.536	94.4712	139.26	51.3996	122.756
FBgn0038870	Oga	101.632	-0.774156	0.334042	-2.31754	0.0204745	0.278146	202.464	119.931	78.3911	110.281	81.2352	161.198	89.969
FBgn0042185	MCU	131.891	1.00428	0.433334	2.31758	0.0204724	0.278146	57.8468	99.7449	119.705	225.96	127.655	78.7959	157.773
FBgn0051713	Apf	48.0488	-1.25798	0.543179	-2.31597	0.0205601	0.278146	47.3292	94.9951	43.4329	19.6654	29.0126	71.1622	30.7036
FBgn0086855	CG17078	80.6914	-1.00457	0.433656	-2.31651	0.0205304	0.278146	207.723	74.8087	60.3823	53.598	110.248	141.266	74.7427
FBgn0011289	TfIIA-L	140.409	0.72757	0.314475	2.3136	0.0206897	0.279211	105.176	113.994	189.622	134.959	249.508	109.585	191.363
FBgn0037647	RagA-B	78.5394	1.02996	0.445547	2.31167	0.0207959	0.279284	23.6646	51.0599	85.8064	71.721	87.0377	37.3622	81.5217
FBgn0261556	CG42674	104.805	-0.939973	0.406604	-2.31177	0.0207906	0.279284	191.946	122.306	72.035	117.993	29.0126	157.126	73.0134
FBgn0262647	Nup160	48.3661	-0.866111	0.374604	-2.31207	0.0207738	0.279284	81.5114	66.4966	27.5428	49.742	40.6176	74.004	39.3008
FBgn0267113	lncRNA:CR45553	42.1964	1.5015	0.649827	2.31062	0.0208539	0.27961	13.147	24.9362	52.9669	20.051	116.05	19.0416	63.0227
FBgn0004373	fwd	275.202	-0.800535	0.346779	-2.30848	0.0209722	0.279843	281.346	149.617	167.376	106.81	75.4326	215.482	116.54
FBgn0032638	SPH93	271.33	1.17769	0.510062	2.30891	0.0209484	0.279843	223.499	148.43	716.113	172.747	365.558	185.964	418.14
FBgn0263237	Cdk7	37.4087	-1.2818	0.555177	-2.30881	0.0209541	0.279843	102.547	54.6222	27.5428	28.5342	46.4201	78.5844	34.1657
FBgn0001122	Galphao	249.955	1.20564	0.523007	2.30521	0.0211551	0.280515	207.723	143.68	747.893	214.392	237.903	175.701	400.063
FBgn0034646	Rae1	71.164	-1.03968	0.451186	-2.30432	0.0212046	0.280515	115.694	92.6203	55.0856	64.7803	11.605	104.157	43.8236
FBgn0036629	GluRS-m	10.8107	-1.7933	0.778069	-2.3048	0.0211776	0.280515	26.294	15.4367	3.17802	7.71194	5.80251	20.8654	5.56416
FBgn0037536	CG2698	88.4027	0.901086	0.391036	2.30435	0.0212028	0.280515	52.588	40.3729	91.1031	89.8441	63.8276	46.4805	81.5916
FBgn0038046	CG5641	327.622	-0.557597	0.241851	-2.30554	0.0211362	0.280515	499.586	425.103	231.995	369.787	342.348	462.345	314.71
FBgn0265276	l(3)neo38	687.526	-0.697079	0.302558	-2.30396	0.0212251	0.280515	1135.9	1015.26	557.212	687.905	754.326	1075.58	666.481
FBgn0033137	Tsp42Ep	254.172	1.0475	0.454877	2.30283	0.0212886	0.280909	207.723	218.489	612.298	208.608	510.621	213.106	443.842
FBgn0002566	lt	120.304	0.675151	0.29357	2.2998	0.0214597	0.282717	60.4762	117.556	151.485	136.501	168.273	89.0164	152.087
FBgn0041150	hoe1	16.5607	1.95998	0.852519	2.29904	0.0215025	0.282832	10.5176	1.18744	20.1274	13.8815	23.21	5.85252	19.073
FBgn0010772	Xe7	200.612	-0.843139	0.36695	-2.2977	0.021579	0.283056	362.857	210.177	184.325	197.426	63.8276	286.517	148.526
FBgn0085428	Nox	36.6918	-1.68683	0.734188	-2.29755	0.0215876	0.283056	63.1056	41.5604	23.3055	9.25433	17.4075	52.333	16.6558
FBgn0000229	bsk	101.953	1.17391	0.511259	2.29612	0.0216693	0.28368	55.2174	56.9971	211.868	92.1577	63.8276	56.1073	122.618
FBgn0278598	lncRNA:CR46268	29.2916	-1.84069	0.801971	-2.2952	0.0217215	0.283916	168.282	16.6242	28.6021	34.3181	5.80251	92.4529	22.9076
FBgn0013467	igl	15.1307	4.3863	1.91334	2.29249	0.0218775	0.284001	0	2.37488	76.2724	9.63992	0	1.18744	28.6374
FBgn0027538	beta4GalNAcTA	28.8441	1.69994	0.741645	2.29212	0.0218988	0.284001	5.2588	21.3739	39.1955	27.3774	87.0377	13.3164	51.2035
FBgn0041605	cpx	77.581	2.49446	1.08804	2.29261	0.0218704	0.284001	34.1822	29.686	455.516	48.9708	29.0126	31.9341	177.833
FBgn0050360	Mal-A6	7.38551	3.22551	1.40618	2.29382	0.0218011	0.284001	5.2588	0	23.3055	7.71194	29.0126	2.6294	20.01
FBgn0262858	CG43222	19.2277	3.0179	1.31569	2.29378	0.0218032	0.284001	0	4.74976	36.0175	2.31358	34.8151	2.37488	24.3821
FBgn0001185	her	34.0536	1.14408	0.49965	2.28976	0.0220352	0.285325	26.294	17.8116	42.3735	40.8733	69.6301	22.0528	50.959
FBgn0015279	Pi3K92E	73.3523	0.843524	0.368595	2.28848	0.0221096	0.285842	31.5528	61.7468	87.9251	94.4712	75.4326	46.6498	85.943
FBgn0032042	CG13398	71.6635	0.898675	0.393711	2.28258	0.0224553	0.288964	47.3292	36.8106	70.9757	71.721	98.6427	42.0699	80.4465
FBgn0034243	Ns2	192.311	-0.617777	0.270622	-2.2828	0.0224421	0.288964	212.981	206.614	117.587	165.421	110.248	209.798	131.085
FBgn0034364	CG5493	27.9121	1.59199	0.69741	2.28272	0.0224468	0.288964	23.6646	11.8744	77.3317	25.835	52.2226	17.7695	51.7964
FBgn0024996	eIF2Bbeta	113.759	-0.742883	0.325655	-2.2812	0.0225367	0.289234	186.687	129.431	76.2724	113.365	81.2352	158.059	90.291
FBgn0031317	Charon	21.4751	1.3553	0.594421	2.28003	0.0226058	0.289234	13.147	10.687	38.1362	31.6189	5.80251	11.917	25.1859
FBgn0034727	mRpS29	249.205	-0.818202	0.358881	-2.27987	0.0226155	0.289234	360.228	294.485	117.587	285.342	133.458	327.356	178.795
FBgn0035099	CG6845	19.2965	1.90576	0.835752	2.2803	0.02259	0.289234	10.5176	5.9372	24.3648	16.9663	58.0251	8.2274	33.1187
FBgn0031558	CG16704	243.993	1.39818	0.613874	2.27764	0.0227482	0.290268	123.582	151.992	479.88	150.383	470.003	137.787	366.756
FBgn0040636	CG13255	7.83662	3.77871	1.65927	2.27734	0.0227661	0.290268	0	1.18744	21.1868	8.86873	0	0.59372	10.0185
FBgn0033153	Gadd45	45.5994	1.61851	0.711107	2.27605	0.0228432	0.290804	28.9234	37.9981	179.028	20.051	116.05	33.4607	105.043
FBgn0000109	Aprt	39.517	1.14863	0.504935	2.2748	0.0229178	0.291308	21.0352	34.4357	84.7471	35.0893	81.2352	27.7355	67.0239
FBgn0030326	CG2444	47.9011	1.75136	0.770203	2.2739	0.0229722	0.291554	15.7764	30.8734	146.189	25.835	69.6301	23.3249	80.5513
FBgn0010288	Uch	330.164	-0.551918	0.242923	-2.27199	0.0230871	0.292546	491.698	406.104	299.793	238.299	417.781	448.901	318.624
FBgn0029113	Uba2	279.766	-0.482779	0.212544	-2.27143	0.0231207	0.292546	470.663	358.607	272.25	334.698	255.311	414.635	287.42
FBgn0039754	CG9747	79.9872	-2.98121	1.31399	-2.26883	0.0232785	0.294094	147.246	144.868	24.3648	18.1231	11.605	146.057	18.031
FBgn0020309	crol	895.211	-0.496405	0.2194	-2.26256	0.023663	0.294789	1225.3	1263.44	904.675	908.081	823.957	1244.37	878.904
FBgn0029123	SoxN	31.3685	2.36912	1.04755	2.26158	0.0237235	0.294789	10.5176	10.687	132.417	25.0638	0	10.6023	52.4937
FBgn0031094	CG9578	108.631	0.854754	0.377159	2.2663	0.0234331	0.294789	65.735	79.5584	93.2218	108.738	232.1	72.6467	144.687
FBgn0034655	CG10307	20.0198	-2.14264	0.947357	-2.26171	0.0237155	0.294789	18.4058	4.74976	1.05934	3.47037	0	11.5778	1.5099
FBgn0038295	Gyc88E	13.163	-1.94203	0.856738	-2.26677	0.0234043	0.294789	31.5528	27.3111	1.05934	13.4959	5.80251	29.432	6.78591
FBgn0038694	CG5217	10.3857	-3.89075	1.71753	-2.26531	0.0234936	0.294789	65.735	14.2493	5.29669	1.54239	0	39.9921	2.27969
FBgn0038714	Cpr92A	10.7227	-4.32261	1.90967	-2.26354	0.0236023	0.294789	7.8882	14.2493	0	0	5.80251	11.0687	1.93417
FBgn0041096	rols	105.364	-0.924836	0.408752	-2.26258	0.0236613	0.294789	194.576	160.304	62.501	100.641	127.655	177.44	96.9323
FBgn0052354	CG32354	45.0907	1.57902	0.69679	2.26613	0.0234433	0.294789	28.9234	7.12464	60.3823	18.1231	81.2352	18.024	53.2468
FBgn0052537	CG32537	29.2878	1.75499	0.775454	2.26318	0.0236246	0.294789	0	11.8744	31.7802	26.9918	5.80251	5.9372	21.5248
FBgn0052581	CG32581	14.3341	1.80824	0.799437	2.26189	0.023704	0.294789	7.8882	5.9372	19.0681	16.5807	46.4201	6.9127	27.3563
FBgn0264959	Src42A	105.5	0.799213	0.353559	2.26048	0.0237918	0.295195	68.3644	62.9343	144.07	87.9161	110.248	65.6494	114.078
FBgn0025936	Eph	168.063	0.782482	0.346414	2.2588	0.0238956	0.296041	123.582	90.2454	253.182	160.023	110.248	106.914	174.484
FBgn0030105	CG15369	183.547	1.36399	0.604626	2.25593	0.024075	0.296497	68.3644	134.181	359.116	139.586	295.928	101.273	264.877
FBgn0030292	CG11752	226.78	-0.739318	0.327623	-2.25661	0.0240322	0.296497	207.723	238.675	79.4504	141.514	208.89	223.199	143.285
FBgn0032859	Arpc2	223.884	0.585138	0.259284	2.25675	0.0240238	0.296497	139.358	217.301	287.081	221.718	336.546	178.33	281.782
FBgn0035491	Dpy-30L2	11.4983	-4.97436	2.20456	-2.2564	0.0240457	0.296497	5.2588	10.687	0	0	0	7.97288	0
FBgn0004588	Eig71Ea	11.2076	2.45158	1.08744	2.25445	0.0241679	0.297201	5.2588	3.56232	34.9582	8.48313	29.0126	4.41056	24.1513
FBgn0000053	Gart	43.2517	-1.13236	0.502501	-2.25345	0.0242305	0.297374	86.7702	54.6222	39.1955	31.2334	17.4075	70.6962	29.2788
FBgn0030000	CG2260	57.1779	-1.1072	0.491516	-2.25262	0.0242828	0.297374	110.435	80.7459	22.2461	36.2461	98.6427	95.5904	52.3783
FBgn0034931	CG2812	22.2889	-1.87441	0.832139	-2.25252	0.0242893	0.297374	47.3292	41.5604	9.53405	11.9535	17.4075	44.4448	12.965
FBgn0044823	Spec2	19.2358	1.7044	0.757512	2.25	0.0244492	0.298453	7.8882	7.12464	25.4241	23.5214	23.21	7.50642	24.0519
FBgn0058263	MFS17	119.798	1.02089	0.453663	2.25033	0.0244278	0.298453	70.9938	84.3082	169.494	136.501	174.075	77.651	160.024
FBgn0023216	Parg	21.1431	1.57491	0.700574	2.24802	0.0245746	0.298588	7.8882	7.12464	25.4241	25.0638	5.80251	7.50642	18.7635
FBgn0085420	DIP-delta	10.1998	4.65815	2.07168	2.24849	0.0245453	0.298588	2.6294	0	42.3735	3.85597	29.0126	1.3147	25.0807
FBgn0259171	Pde9	127.605	1.13189	0.503421	2.2484	0.0245508	0.298588	42.0704	83.1208	223.52	101.412	87.0377	62.5956	137.323
FBgn0263260	sel	71.312	0.989045	0.440052	2.24756	0.024604	0.298588	42.0704	47.4976	136.655	51.2844	81.2352	44.784	89.7247
FBgn0020279	lig	521.487	-0.54281	0.24171	-2.24571	0.0247228	0.298873	765.156	790.835	354.878	615.027	655.684	777.995	541.863
FBgn0029878	Pat1	89.5347	0.794432	0.353694	2.2461	0.0246974	0.298873	47.3292	72.4338	118.646	115.679	69.6301	59.8815	101.318
FBgn0036908	TORIP	127.868	0.68458	0.304942	2.24495	0.0247713	0.298873	81.5114	89.058	163.138	120.692	127.655	85.2847	137.162
FBgn0038172	Adgf-D	21.8356	1.5474	0.689251	2.24504	0.0247654	0.298873	10.5176	14.2493	54.0263	23.1358	34.8151	12.3834	37.3257
FBgn0052121	CG32121	499.351	-1.0245	0.456503	-2.24424	0.0248169	0.298989	294.493	434.603	91.1031	251.795	197.285	364.548	180.061
FBgn0030183	CG15309	592.545	0.586014	0.261393	2.24189	0.0249686	0.299515	439.11	480.913	970.354	574.154	504.818	460.011	683.109
FBgn0030334	Karl	63.3138	1.09114	0.486644	2.24218	0.0249497	0.299515	31.5528	64.1217	138.773	86.3737	87.0377	47.8373	104.062
FBgn0036668	Zcchc7	91.7765	-0.832486	0.371191	-2.24275	0.0249132	0.299515	199.834	118.744	104.875	101.026	34.8151	159.289	80.2387
FBgn0001149	GstD1	1668.91	-0.413206	0.184661	-2.23765	0.025244	0.300268	1522.42	1458.18	1037.09	1173.37	1148.9	1490.3	1119.79
FBgn0003889	betaTub85D	23.6816	-2.58129	1.15507	-2.23474	0.0254342	0.300268	89.3996	18.999	21.1868	2.69918	0	54.1993	7.96198
FBgn0017566	ND-75	503.301	-0.664048	0.297209	-2.23428	0.0254648	0.300268	562.692	495.162	185.384	399.093	435.188	528.927	339.888
FBgn0030529	Clic	102.628	0.935641	0.418575	2.2353	0.0253976	0.300268	44.6998	59.372	157.841	95.2424	23.21	52.0359	92.098
FBgn0030554	CG1434	13.6791	2.22399	0.993191	2.23923	0.0251407	0.300268	0	7.12464	11.6527	14.2671	46.4201	3.56232	24.1133
FBgn0032290	CG6443	29.0746	1.20416	0.538737	2.23516	0.0254068	0.300268	13.147	16.6242	28.6021	34.3181	52.2226	14.8856	38.381
FBgn0034117	CG7997	133.605	1.24575	0.557174	2.23584	0.025362	0.300268	84.1408	113.994	246.826	117.607	359.756	99.0675	241.396
FBgn0038546	CG7379	41.2554	-1.05795	0.472654	-2.23832	0.0251999	0.300268	57.8468	67.684	22.2461	43.9581	11.605	62.7654	25.9364
FBgn0039338	XNP	131.636	-0.711248	0.318298	-2.23454	0.0254477	0.300268	257.681	161.492	127.121	149.612	81.2352	209.587	119.322
FBgn0053493	CG33493	135.696	1.02307	0.45759	2.23577	0.0253666	0.300268	134.099	89.058	306.149	124.162	249.508	111.579	226.606
FBgn0086372	lap	96.24	0.845627	0.378115	2.23643	0.0253237	0.300268	57.8468	80.7459	187.503	80.9754	110.248	69.2963	126.242
FBgn0259878	Fs	10.0465	-2.19622	0.982126	-2.23619	0.0253394	0.300268	28.9234	7.12464	5.29669	3.47037	0	18.024	2.92236
FBgn0003977	vir	36.2869	-1.02884	0.460716	-2.23314	0.0255397	0.300359	86.7702	62.9343	28.6021	50.1276	17.4075	74.8523	32.0458
FBgn0026059	Mhcl	751.228	-0.868409	0.389078	-2.23197	0.025617	0.300359	1170.08	1115.01	343.226	872.22	661.486	1142.54	625.644
FBgn0030739	SWIP	40.1968	-1.13324	0.507728	-2.23198	0.0256165	0.300359	120.952	55.8096	54.0263	34.3181	23.21	88.381	37.1848
FBgn0263355	CG31688	10.8827	3.35082	1.50109	2.23226	0.0255981	0.300359	2.6294	1.18744	36.0175	4.62716	11.605	1.90842	17.4166
FBgn0030925	Hayan	53.0263	1.20145	0.538796	2.22988	0.0257553	0.30113	36.8116	42.7478	135.595	42.4157	104.445	39.7797	94.1521
FBgn0058045	CG40045	263.196	0.70588	0.316543	2.22996	0.0257498	0.30113	131.47	178.116	244.707	200.896	348.151	154.793	264.585
FBgn0033019	CG10395	117.234	1.11414	0.500005	2.22826	0.0258629	0.301964	60.4762	66.4966	95.3405	164.65	156.668	63.4864	138.886
FBgn0031881	MME1	12.0148	2.8522	1.28143	2.22579	0.0260281	0.303041	0	3.56232	5.29669	8.48313	46.4201	1.78116	20.0666
FBgn0037716	Son	24.4092	-1.46999	0.660354	-2.22607	0.0260097	0.303041	81.5114	46.3101	33.8988	12.7247	23.21	63.9108	23.2779
FBgn0086687	Desat1	136.623	0.739358	0.33253	2.22343	0.0261867	0.304462	94.6584	83.1208	163.138	120.692	168.273	88.8896	150.701
FBgn0085453	Mthfs	103.846	0.89439	0.402501	2.22208	0.0262778	0.304669	99.9172	102.12	252.123	106.81	214.693	101.019	191.209
FBgn0266889	asRNA:CR45350	9.38888	-2.66488	1.19903	-2.22253	0.0262476	0.304669	7.8882	9.49951	0	2.31358	0	8.69386	0.771194
FBgn0000024	Ace	34.2754	2.58216	1.16619	2.21419	0.0268158	0.304899	13.147	8.31208	149.367	28.9198	5.80251	10.7295	61.363
FBgn0000639	Fbp1	2117.48	0.972711	0.439106	2.21521	0.0267456	0.304899	1582.9	2019.83	4972.54	2066.41	3574.35	1801.37	3537.77
FBgn0003044	Pcl	82.31	-0.666048	0.301015	-2.21267	0.0269202	0.304899	107.805	115.182	65.679	74.8058	69.6301	111.494	70.0383
FBgn0011715	Snr1	83.3743	-0.914537	0.413151	-2.21357	0.0268586	0.304899	191.946	110.432	79.4504	84.0601	69.6301	151.189	77.7136
FBgn0015024	CkIalpha	1200.52	-0.386753	0.174528	-2.21599	0.0266923	0.304899	1482.98	1475.99	1084.76	1131.73	1189.51	1479.48	1135.33
FBgn0030008	CG2129	8.77332	3.29825	1.48511	2.22088	0.0263593	0.304899	2.6294	0	7.41537	10.4111	5.80251	1.3147	7.87633
FBgn0031501	CG17261	8.26308	-3.2987	1.49092	-2.21252	0.0269307	0.304899	15.7764	5.9372	2.11868	0.385597	0	10.8568	0.834758
FBgn0032444	CCT4	1215.61	-0.664377	0.299918	-2.2152	0.0267463	0.304899	1693.33	1563.86	617.594	1179.54	1305.57	1628.6	1034.23
FBgn0034858	eIF2Bdelta	124.29	-0.663983	0.299637	-2.21596	0.0266945	0.304899	202.464	147.242	80.5097	138.429	98.6427	174.853	105.861
FBgn0035285	CG12025	166.514	0.733034	0.330784	2.21605	0.0266881	0.304899	97.2878	143.68	286.021	188.171	110.248	120.484	194.813
FBgn0036890	CG9368	24.12	3.44639	1.55795	2.21213	0.0269579	0.304899	0	7.12464	102.756	13.1103	11.605	3.56232	42.4904
FBgn0037107	CG7166	17.6207	3.82894	1.72965	2.21371	0.0268486	0.304899	2.6294	3.56232	103.815	6.16955	23.21	3.09586	44.3983
FBgn0038092	beat-Vb	7.57919	5.49027	2.47302	2.22007	0.0264142	0.304899	0	0	39.1955	3.08478	0	0	14.0934
FBgn0039186	CG5746	212.583	0.624091	0.282073	2.21252	0.026931	0.304899	126.211	175.741	226.698	240.998	243.705	150.976	237.134
FBgn0039637	Ctl2	124.523	0.869766	0.391879	2.21948	0.0264544	0.304899	68.3644	105.682	185.384	115.679	197.285	87.0233	166.116
FBgn0041188	Atx2	433.304	-0.784252	0.354191	-2.21421	0.0268144	0.304899	823.002	561.659	335.81	435.725	435.188	692.331	402.241
FBgn0043884	mask	307.061	-0.706736	0.319151	-2.21442	0.0267996	0.304899	378.634	306.359	216.105	261.049	121.853	342.497	199.669
FBgn0250788	beta-Spec	469.462	-0.69326	0.31306	-2.21446	0.0267971	0.304899	525.88	491.6	233.055	432.64	261.113	508.74	308.936
FBgn0033079	Fmo-2	17.0815	1.51665	0.686285	2.20994	0.0271093	0.306195	21.0352	10.687	47.6702	57.8395	11.605	15.8611	39.0383
FBgn0019890	Smg5	173.251	-0.609597	0.276316	-2.20616	0.027373	0.308754	257.681	175.741	175.85	142.285	69.6301	216.711	129.255
FBgn0039555	mRpS22	223.896	-0.733188	0.332489	-2.20515	0.0274437	0.309132	215.611	232.738	126.061	137.658	145.063	224.174	136.261
FBgn0052638	CG32638	276.849	0.661598	0.300247	2.20351	0.0275585	0.310005	163.023	229.176	261.657	347.037	336.546	196.099	315.08
FBgn0032481	CG16972	26.0391	-1.53466	0.697152	-2.20132	0.0277132	0.310904	81.5114	30.8734	23.3055	21.2078	5.80251	56.1924	16.7719
FBgn0039650	Mesh1	31.2871	-1.6604	0.754182	-2.20159	0.0276945	0.310904	15.7764	56.9971	6.35603	18.8942	5.80251	36.3867	10.3509
FBgn0061356	CG18003	15.669	1.65126	0.751527	2.1972	0.0280061	0.313767	7.8882	11.8744	48.7296	18.8942	29.0126	9.8813	32.2121
FBgn0266851	lncRNA:CR45312	7.25531	3.15379	1.43756	2.19384	0.0282466	0.316035	0	4.74976	54.0263	16.1951	0	2.37488	23.4071
FBgn0038627	CG7694	67.9211	0.961354	0.438765	2.19105	0.0284485	0.317866	26.294	28.4985	44.4922	45.886	92.8402	27.3963	61.0728
FBgn0263076	Klp54D	9.31893	-3.44809	1.57426	-2.19028	0.0285037	0.318055	5.2588	1.18744	0	0	0	3.22312	0
FBgn0011655	Med	172.817	-0.695093	0.317518	-2.18914	0.0285863	0.318123	320.787	251.737	169.494	237.528	87.0377	286.262	164.687
FBgn0039915	Gat	12.121	2.55686	1.16795	2.1892	0.0285824	0.318123	2.6294	4.74976	52.9669	10.0255	0	3.68958	20.9975
FBgn0030912	CG6023	43.1317	-1.16747	0.533572	-2.18803	0.0286671	0.318595	47.3292	52.2473	8.47471	33.1613	23.21	49.7883	21.6154
FBgn0022288	l(2)09851	124.665	-0.583458	0.26702	-2.18507	0.0288835	0.319718	139.358	130.618	74.1537	93.3145	116.05	134.988	94.5061
FBgn0035960	CG4942	28.2246	2.13143	0.975261	2.1855	0.028852	0.319718	5.2588	3.56232	3.17802	23.907	34.8151	4.41056	20.6334
FBgn0261584	CG42694	16.0306	2.00063	0.915178	2.18605	0.028812	0.319718	2.6294	14.2493	30.7208	20.051	69.6301	8.43934	40.134
FBgn0013733	shot	1562.32	-0.727994	0.333415	-2.18345	0.0290028	0.320232	1953.64	2300.07	835.818	1710.12	1305.57	2126.86	1283.84
FBgn0050026	CG30026	120.878	1.03839	0.475646	2.18312	0.0290273	0.320232	110.435	98.5575	271.191	81.361	307.533	104.496	220.028
FBgn0052698	CARPB	64.7982	1.04106	0.476922	2.18287	0.0290454	0.320232	39.441	66.4966	121.824	67.0939	162.47	52.9688	117.129
FBgn0015801	Reg-5	28.0807	1.83572	0.841482	2.18153	0.0291441	0.320532	5.2588	3.56232	14.8307	15.8095	11.605	4.41056	14.0817
FBgn0030055	CG12772	9.14512	2.82479	1.29491	2.18146	0.0291498	0.320532	0	2.37488	10.5934	11.1823	11.605	1.18744	11.1269
FBgn0033179	p47	147.998	-0.735808	0.337414	-2.18073	0.0292036	0.320699	155.135	203.052	100.637	117.607	104.445	179.093	107.563
FBgn0038400	CG5903	622.924	-0.600779	0.275888	-2.17762	0.0294346	0.32281	688.903	587.782	313.564	528.653	411.978	638.343	418.065
FBgn0002787	Rpn8	117.193	-0.597386	0.274406	-2.17702	0.0294792	0.322873	149.876	166.242	99.5778	107.582	110.248	158.059	105.802
FBgn0053129	CG33129	246.825	0.653496	0.30042	2.17527	0.0296098	0.323666	191.946	212.552	425.854	267.99	249.508	202.249	314.451
FBgn0058160	CG40160	113.996	0.800399	0.367998	2.17501	0.0296295	0.323666	39.441	83.1208	116.527	92.5433	139.26	61.2809	116.11
FBgn0016041	Tom40	486.088	-0.628423	0.289196	-2.173	0.0297801	0.324884	410.187	349.107	230.936	335.469	127.655	379.647	231.353
FBgn0039114	Lsd-1	76.6872	1.08033	0.497308	2.17235	0.029829	0.324991	49.9586	72.4338	215.046	75.1914	98.6427	61.1962	129.627
FBgn0002283	l(3)73Ah	24.5746	1.33914	0.617392	2.16902	0.0300812	0.325605	15.7764	7.12464	23.3055	21.5934	46.4201	11.4505	30.4397
FBgn0011802	Gem3	27.6772	-1.26282	0.582111	-2.16937	0.0300544	0.325605	70.9938	39.1855	26.4835	28.1486	0	55.0897	18.2107
FBgn0032856	CG16798	35.503	-1.83448	0.845296	-2.17022	0.02999	0.325605	65.735	23.7488	20.1274	5.78395	11.605	44.7419	12.5055
FBgn0036627	Gagr	38.3789	1.26286	0.581772	2.17071	0.0299534	0.325605	18.4058	28.4985	51.9076	42.4157	92.8402	23.4522	62.3878
FBgn0040206	krz	84.9955	1.08338	0.499451	2.16914	0.0300718	0.325605	47.3292	54.6222	164.197	99.8696	46.4201	50.9757	103.496
FBgn0039528	dsd	95.604	-0.766017	0.353465	-2.16717	0.0302221	0.326705	128.841	147.242	66.7383	97.556	75.4326	138.042	79.909
FBgn0034443	cer	386.984	0.978159	0.451534	2.1663	0.0302883	0.326996	241.905	292.11	708.698	277.63	603.461	267.007	529.93
FBgn0010470	Fkbp14	237.6	0.580632	0.268133	2.16547	0.0303519	0.327258	189.317	211.364	371.828	226.345	313.336	200.341	303.836
FBgn0031913	CG5958	190.68	0.867832	0.401173	2.16323	0.0305232	0.328597	149.876	169.804	437.507	167.735	272.718	159.84	292.653
FBgn0259734	Nost	63.5563	-1.12904	0.522024	-2.16282	0.0305552	0.328597	76.2526	90.2454	18.0088	57.8395	34.8151	83.249	36.8878
FBgn0010621	CCT5	1674.69	-0.618766	0.286203	-2.16199	0.0306192	0.328858	2279.69	1899.9	936.455	1604.85	1549.27	2089.8	1363.53
FBgn0033958	jef	6.60481	4.48578	2.07533	2.16148	0.0306586	0.328858	0	0	13.7714	5.78395	0	0	6.51845
FBgn0034496	CG9143	53.1888	-0.905208	0.418899	-2.16092	0.0307012	0.32889	52.588	75.9961	20.1274	43.1869	46.4201	64.2921	36.5781
FBgn0004657	mys	375.246	-0.551968	0.255565	-2.1598	0.0307884	0.329401	470.663	496.35	349.582	346.652	278.521	483.506	324.918
FBgn0032796	CG10188	14.834	-1.76502	0.817554	-2.1589	0.0308576	0.329716	44.6998	22.5613	8.47471	14.2671	0	33.6306	7.5806
FBgn0034060	CG8370	55.5629	-0.993251	0.460346	-2.15762	0.0309574	0.330138	89.3996	93.8077	46.6109	48.1996	40.6176	91.6037	45.1427
FBgn0259112	asRNA:CR42254	16.0293	2.17003	1.00586	2.15737	0.0309765	0.330138	7.8882	3.56232	13.7714	15.8095	52.2226	5.72526	27.2678
FBgn0040281	Aplip1	12.0881	2.97513	1.37955	2.15659	0.0310375	0.330364	5.2588	3.56232	87.9251	9.25433	0	4.41056	32.3931
FBgn0032803	CG13082	391.398	-1.54439	0.716888	-2.15429	0.0312171	0.330583	278.716	129.431	65.679	64.3947	81.2352	204.074	70.4363
FBgn0052212	CG32212	5.66529	-2.27399	1.05547	-2.15449	0.0312014	0.330583	21.0352	5.9372	2.11868	3.47037	0	13.4862	1.86302
FBgn0259213	side-II	7.63566	4.39295	2.03785	2.15568	0.0311085	0.330583	0	1.18744	48.7296	0.771194	0	0.59372	16.5003
FBgn0261673	nemy	358.121	0.538028	0.249659	2.15505	0.0311578	0.330583	255.052	273.111	330.514	348.965	510.621	264.081	396.7
FBgn0022382	Pka-R2	120.691	1.11334	0.516927	2.15376	0.0312589	0.330604	92.029	61.7468	298.734	110.281	69.6301	76.8879	159.548
FBgn0003687	Tbp	49.5258	-0.741563	0.34467	-2.15152	0.0314353	0.332048	94.6584	78.371	41.3142	56.6827	58.0251	86.5147	52.0074
FBgn0001977	CIAPIN1	102.787	-0.750973	0.350068	-2.14522	0.0319351	0.333371	134.099	119.931	60.3823	74.8058	104.445	127.015	79.8778
FBgn0002036	CG10561	27.835	-1.15712	0.539286	-2.14565	0.0319012	0.333371	57.8468	32.0609	15.8901	23.1358	17.4075	44.9538	18.8111
FBgn0002413	dco	324.535	0.5351	0.249011	2.1489	0.031642	0.333371	197.205	263.612	349.582	384.44	249.508	230.408	327.843
FBgn0026415	Idgf4	183.854	0.938041	0.436843	2.14732	0.0317679	0.333371	134.099	140.118	395.133	178.917	208.89	137.109	260.98
FBgn0035056	spz6	96.8383	-1.49411	0.696731	-2.14446	0.0319958	0.333371	99.9172	40.3729	27.5428	31.6189	5.80251	70.1451	21.6548
FBgn0035915	S-Lap1	35.0788	-2.43437	1.13407	-2.14658	0.0318271	0.333371	118.323	55.8096	31.7802	8.09754	5.80251	87.0663	15.2267
FBgn0036381	CG8745	23.069	1.85937	0.866499	2.14584	0.031886	0.333371	10.5176	13.0618	64.6197	20.8222	46.4201	11.7897	43.954
FBgn0036547	CG17032	72.5836	-1.17386	0.547409	-2.14439	0.0320017	0.333371	113.064	75.9961	36.0175	53.2124	29.0126	94.5302	39.4142
FBgn0052412	QC	20.2236	1.68815	0.786107	2.14748	0.0317553	0.333371	2.6294	18.999	37.0769	31.6189	52.2226	10.8142	40.3061
FBgn0265595	CG44422	14.5007	2.88831	1.34681	2.14455	0.0319887	0.333371	5.2588	0	27.5428	10.7967	0	2.6294	12.7798
FBgn0270927	betaGlu	18.7156	1.56607	0.730175	2.14479	0.0319692	0.333371	18.4058	2.37488	33.8988	21.979	17.4075	10.3903	24.4285
FBgn0000150	awd	3312.63	-0.606457	0.283276	-2.14087	0.0322848	0.335061	3720.6	3261.9	1718.25	2333.63	2849.03	3491.25	2300.3
FBgn0001301	kel	70.1435	1.02596	0.479228	2.14087	0.0322845	0.335061	26.294	23.7488	37.0769	66.3227	40.6176	25.0214	48.0057
FBgn0039994	conu	117.721	0.57888	0.270317	2.14149	0.0322349	0.335061	97.2878	68.8715	103.815	130.717	127.655	83.0797	120.729
FBgn0001991	Ca-alpha1D	124.282	-0.941502	0.440206	-2.13878	0.0324537	0.335556	147.246	144.868	49.7889	107.196	63.8276	146.057	73.6042
FBgn0033692	wash	31.7298	1.11035	0.519054	2.13917	0.0324215	0.335556	13.147	16.6242	36.0175	33.9325	23.21	14.8856	31.0534
FBgn0042179	Ugt305A1	6.06951	-4.46867	2.08867	-2.13948	0.0323965	0.335556	31.5528	9.49951	0	1.54239	0	20.5262	0.514129
FBgn0037766	Teh1	17.2031	2.59476	1.214	2.13737	0.032568	0.335903	15.7764	0	68.857	8.48313	52.2226	7.8882	43.1876
FBgn0285910	VhaAC39-1	163.235	0.654201	0.306046	2.13759	0.0325501	0.335903	152.505	84.3082	185.384	172.747	185.68	118.407	181.271
FBgn0015794	Rab18	108.073	1.02927	0.48199	2.13547	0.0327226	0.336027	47.3292	73.6212	93.2218	71.3354	243.705	60.4752	136.088
FBgn0030778	CG4678	13.6021	-2.88931	1.35234	-2.13653	0.0326363	0.336027	5.2588	17.8116	3.17802	0.771194	0	11.5352	1.3164
FBgn0041629	Hexo2	32.5821	1.45586	0.681536	2.13615	0.0326674	0.336027	2.6294	26.1237	70.9757	39.3309	11.605	14.3765	40.6372
FBgn0085451	htk	42.4918	1.09011	0.510533	2.13524	0.0327417	0.336027	10.5176	29.686	37.0769	52.4412	52.2226	20.1018	47.2469
FBgn0011705	rost	13.1907	2.75143	1.28973	2.13333	0.0328978	0.337213	5.2588	3.56232	60.3823	7.32634	17.4075	4.41056	28.3721
FBgn0031638	CG11927	55.1339	-1.05111	0.492859	-2.13267	0.0329518	0.33735	118.323	48.685	38.1362	50.1276	17.4075	83.504	35.2238
FBgn0002789	Mp20	26.342	1.57788	0.741349	2.12839	0.0333051	0.338895	13.147	4.74976	21.1868	18.8942	40.6176	8.94838	26.8995
FBgn0004055	uzip	20.7581	2.30885	1.08437	2.12921	0.0332369	0.338895	7.8882	5.9372	51.9076	15.0383	34.8151	6.9127	33.9203
FBgn0031238	CG3645	37.3095	-0.981349	0.460668	-2.13027	0.033149	0.338895	68.3644	51.0599	19.0681	34.7037	40.6176	59.7122	31.4631
FBgn0039581	Moca-cyp	85.4961	-0.888789	0.417465	-2.12902	0.033253	0.338895	194.576	116.369	63.5603	78.2762	121.853	155.472	87.8964
FBgn0250848	26-29-p	1298.88	0.884315	0.415489	2.12837	0.0333065	0.338895	1256.85	1119.76	3049.84	1654.6	1868.41	1188.3	2190.95
FBgn0000116	Argk	14243.5	-0.757358	0.356314	-2.12553	0.0335422	0.338898	21879.2	20324.2	6902.65	15800.2	14755.8	21101.7	12486.2
FBgn0001986	Mtr4	35.3131	1.09864	0.517606	2.12253	0.0337929	0.338898	7.8882	30.8734	43.4329	53.598	34.8151	19.3808	43.9486
FBgn0013305	Nmda1	149.019	0.595002	0.280194	2.12353	0.0337093	0.338898	115.694	136.556	256.36	150.768	162.47	126.125	189.866
FBgn0016977	spen	1203.33	-0.534799	0.251567	-2.12587	0.0335138	0.338898	1766.96	1522.3	1309.34	1127.87	945.809	1644.63	1127.67
FBgn0024362	Naa30A	171.152	0.703358	0.331893	2.11923	0.0340707	0.338898	65.735	144.868	145.129	207.066	179.878	105.301	177.358
FBgn0024754	Flo1	213.771	-0.628275	0.296303	-2.12038	0.0339742	0.338898	270.828	309.922	175.85	187.786	208.89	290.375	190.842
FBgn0030266	CG11122	35.2688	-1.21984	0.575628	-2.11914	0.0340787	0.338898	81.5114	68.8715	29.6615	41.6445	17.4075	75.1915	29.5712
FBgn0030749	AnxB11	230.732	0.790862	0.373094	2.11974	0.034028	0.338898	152.505	201.865	443.863	243.697	226.298	177.185	304.619
FBgn0035374	mRpS35	185.107	-0.739323	0.347712	-2.12625	0.0334822	0.338898	155.135	182.866	82.6284	108.353	121.853	169	104.278
FBgn0035471	Sc2	178.909	-0.49507	0.233275	-2.12226	0.0338161	0.338898	207.723	192.365	158.901	131.874	127.655	200.044	139.477
FBgn0035495	CG14989	116.224	3.27699	1.54621	2.11937	0.0340591	0.338898	34.1822	9.49951	582.636	40.8733	0	21.8409	207.837
FBgn0036118	Blos2	17.9219	-1.38257	0.650635	-2.12496	0.0335899	0.338898	34.1822	22.5613	11.6527	12.7247	0	28.3718	8.12581
FBgn0037414	Osi7	23.7925	2.14575	1.01004	2.12442	0.0336354	0.338898	0	9.49951	8.47471	30.0766	40.6176	4.74976	26.3896
FBgn0040011	Slmap	91.6067	-0.868663	0.409037	-2.12368	0.0336971	0.338898	110.435	65.3092	60.3823	31.2334	58.0251	87.872	49.8803
FBgn0043455	CG5986	70.6582	-0.875618	0.412509	-2.12266	0.0337821	0.338898	86.7702	72.4338	36.0175	49.742	40.6176	79.602	42.1257
FBgn0054012	CG34012	5.98831	3.70703	1.74778	2.121	0.033922	0.338898	0	0	6.35603	3.85597	0	0	3.404
FBgn0264006	dysc	31.6096	2.75297	1.29912	2.11911	0.0340814	0.338898	5.2588	5.9372	94.2811	15.0383	0	5.598	36.4398
FBgn0264712	CG1172	268.702	0.705829	0.332455	2.12308	0.0337469	0.338898	223.499	207.802	493.652	238.299	319.138	215.65	350.363
FBgn0267631	asRNA:CR45969	8.62941	-1.80905	0.850309	-2.12752	0.0333769	0.338898	21.0352	22.5613	12.7121	3.08478	0	21.7983	5.26561
FBgn0038376	Hmt-1	51.9423	1.14931	0.542762	2.11752	0.0342154	0.339824	34.1822	14.2493	48.7296	62.0811	29.0126	24.2157	46.6077
FBgn0029665	CG14270	74.7782	1.01926	0.481494	2.11687	0.034271	0.339873	28.9234	49.8725	61.4416	74.4202	127.655	39.3979	87.839
FBgn0037623	CG9801	48.1781	1.07856	0.509595	2.1165	0.0343021	0.339873	10.5176	35.6232	66.7383	47.4284	40.6176	23.0704	51.5948
FBgn0031529	CG9662	65.0288	1.01841	0.481425	2.11541	0.0343948	0.340386	47.3292	33.2483	82.6284	65.9371	98.6427	40.2888	82.4027
FBgn0038235	CG8461	22.7784	-1.26422	0.597952	-2.11425	0.0344941	0.340963	55.2174	39.1855	27.5428	17.7375	5.80251	47.2015	17.0276
FBgn0030759	CG13014	27.1569	-1.60311	0.758778	-2.11275	0.034622	0.341821	15.7764	55.8096	3.17802	17.7375	17.4075	35.793	12.7743
FBgn0000244	by	44.6526	-0.927091	0.442112	-2.09696	0.0359971	0.342141	55.2174	34.4357	15.8901	24.6782	34.8151	44.8266	25.1278
FBgn0000567	Eip74EF	279.419	-0.734877	0.349588	-2.10213	0.0355423	0.342141	241.905	277.861	137.714	215.549	92.8402	259.883	148.701
FBgn0004172	Mst84Da	10.8393	-3.39135	1.61615	-2.09842	0.0358681	0.342141	26.294	14.2493	1.05934	3.08478	0	20.2716	1.38137
FBgn0004370	Ptp10D	66.8115	1.32162	0.628015	2.10444	0.0353402	0.342141	34.1822	35.6232	114.409	61.6955	87.0377	34.9027	87.7139
FBgn0004867	RpS2	5122.26	-0.531576	0.252045	-2.10905	0.0349402	0.342141	6912.69	5889.7	3308.31	4171.77	5843.13	6401.2	4441.07
FBgn0020910	RpL3	8184.67	-0.46563	0.221859	-2.09876	0.035838	0.342141	10291.5	9386.71	5190.76	7450.89	8767.59	9839.09	7136.41
FBgn0024841	Pcd	145.057	0.81253	0.386549	2.10201	0.0355523	0.342141	139.358	81.9333	208.69	105.654	284.323	110.646	199.555
FBgn0025742	mtm	114.81	-0.580842	0.276104	-2.10371	0.0354037	0.342141	212.981	166.242	105.934	130.717	150.865	189.611	129.172
FBgn0028292	ric8a	29.9801	1.18886	0.566676	2.09796	0.0359085	0.342141	23.6646	14.2493	49.7889	31.2334	46.4201	18.9569	42.4808
FBgn0029823	Shmt	497.219	0.695155	0.329755	2.1081	0.0350226	0.342141	588.986	448.852	1052.98	579.938	887.784	518.919	840.235
FBgn0030555	Fbxl4	11.3894	-1.59885	0.761016	-2.10095	0.0356457	0.342141	21.0352	14.2493	3.17802	7.32634	5.80251	17.6422	5.43562
FBgn0032804	CG13081	280.12	-2.1212	1.00502	-2.11061	0.0348057	0.342141	84.1408	85.4956	33.8988	15.0383	5.80251	84.8182	18.2465
FBgn0033551	CG7222	60.251	1.17477	0.558832	2.10219	0.0355368	0.342141	47.3292	30.8734	133.477	61.6955	58.0251	39.1013	84.3991
FBgn0033949	Had2	59.2065	1.13825	0.541305	2.10279	0.0354844	0.342141	63.1056	39.1855	155.723	41.2589	145.063	51.1456	114.015
FBgn0034132	S-Lap8	16.4553	-2.80227	1.3324	-2.10317	0.0354508	0.342141	49.9586	13.0618	4.23735	1.54239	11.605	31.5102	5.79492
FBgn0035203	CG9149	51.262	-0.974283	0.461375	-2.1117	0.0347124	0.342141	55.2174	46.3101	21.1868	29.691	23.21	50.7638	24.6959
FBgn0035431	CG14968	23.2605	1.4345	0.682462	2.10194	0.0355583	0.342141	10.5176	14.2493	44.4922	25.0638	34.8151	12.3834	34.7904
FBgn0035478	CG10853	5.46651	3.48319	1.66049	2.09769	0.0359324	0.342141	0	1.18744	12.7121	8.09754	5.80251	0.59372	8.8707
FBgn0035522	CG1273	39.2051	-1.99849	0.953065	-2.09691	0.0360016	0.342141	134.099	39.1855	30.7208	26.9918	0	86.6425	19.2375
FBgn0037106	CG11307	34.8179	-1.00903	0.479403	-2.10476	0.0353124	0.342141	84.1408	58.1845	59.323	21.2078	17.4075	71.1627	32.6461
FBgn0037416	Osi9	130.485	-2.9949	1.42776	-2.09762	0.0359387	0.342141	89.3996	24.9362	14.8307	4.24157	0	57.1679	6.35744
FBgn0038632	CG14301	20.0212	2.49229	1.18382	2.1053	0.0352648	0.342141	2.6294	4.74976	33.8988	9.63992	23.21	3.68958	22.2496
FBgn0038810	Srp72	97.6589	-0.914309	0.436094	-2.09659	0.0360301	0.342141	147.246	122.306	50.8483	84.0601	81.2352	134.776	72.0479
FBgn0038980	Octbeta1R	6.05962	3.69312	1.76025	2.09806	0.0358996	0.342141	0	2.37488	43.4329	9.25433	0	1.18744	17.5624
FBgn0039075	CG4393	160.198	-0.717169	0.341465	-2.10027	0.0357049	0.342141	128.841	186.428	88.9845	100.641	104.445	157.634	98.0235
FBgn0039116	CG10375	93.5947	-0.710723	0.336754	-2.11051	0.0348145	0.342141	152.505	104.495	85.8064	65.5515	87.0377	128.5	79.4652
FBgn0039723	CG15522	23.2962	2.94997	1.40688	2.09681	0.0360102	0.342141	0	10.687	108.053	13.4959	11.605	5.34348	44.3845
FBgn0042125	CG18787	8.50721	-1.97337	0.941351	-2.09632	0.0360538	0.342141	34.1822	5.9372	2.11868	8.09754	0	20.0597	3.4054
FBgn0051301	CG31301	57.1365	-0.71399	0.3389	-2.10679	0.035136	0.342141	70.9938	77.1836	47.6702	50.1276	23.21	74.0887	40.336
FBgn0052195	CG32195	14.9093	2.41399	1.14828	2.10226	0.0355305	0.342141	5.2588	7.12464	49.7889	8.09754	46.4201	6.19172	34.7688
FBgn0052350	Vps11	53.3818	1.11943	0.530915	2.1085	0.0349881	0.342141	13.147	34.4357	78.3911	51.67	23.21	23.7914	51.0904
FBgn0053543	CG33543	7.7656	5.30233	2.51326	2.10974	0.0348807	0.342141	0	0	37.0769	0	0	0	12.359
FBgn0085399	CG34370	19.4083	3.60617	1.71611	2.10136	0.0356093	0.342141	7.8882	1.18744	138.773	13.1103	0	4.53782	50.6279
FBgn0085446	CG34417	742.156	-0.76273	0.363447	-2.0986	0.0358521	0.342141	812.485	1084.13	398.311	777.363	493.213	948.308	556.296
FBgn0036266	CG5626	10.2779	-1.79654	0.857216	-2.09578	0.0361017	0.342205	34.1822	17.8116	6.35603	10.4111	0	25.9969	5.58905
FBgn0264357	SNF4Agamma	289.941	-0.528564	0.252272	-2.09522	0.0361517	0.342288	333.934	341.983	235.173	245.24	214.693	337.958	231.702
FBgn0031490	CG17264	14.6438	1.9451	0.928949	2.09387	0.0362714	0.342726	2.6294	8.31208	43.4329	14.6527	5.80251	5.47074	21.296
FBgn0040777	CG14767	123.186	0.726394	0.346998	2.09337	0.0363163	0.342726	92.029	90.2454	203.393	112.209	133.458	91.1372	149.687
FBgn0086677	jeb	28.6768	2.44547	1.16823	2.09331	0.0363216	0.342726	23.6646	2.37488	163.138	16.1951	17.4075	13.0197	65.5803
FBgn0263929	jvl	246.398	0.788886	0.37701	2.09248	0.0363956	0.343035	81.5114	93.8077	239.411	106.039	98.6427	87.6596	148.031
FBgn0031676	senju	27.9745	-1.42566	0.68189	-2.09075	0.0365501	0.343397	99.9172	14.2493	18.0088	23.907	17.4075	57.0833	19.7744
FBgn0053302	Cpr31A	5.22293	3.56239	1.70395	2.09067	0.036558	0.343397	0	1.18744	13.7714	8.48313	5.80251	0.59372	9.35235
FBgn0261015	Pif1A	6.69888	-4.31034	2.06108	-2.09131	0.0365004	0.343397	0	22.5613	0	0	5.80251	11.2807	1.93417
FBgn0001208	Hn	73.8009	1.05178	0.503276	2.08986	0.0366305	0.343584	97.2878	48.685	211.868	65.9371	174.075	72.9864	150.627
FBgn0263353	CG11000	10.3427	-2.44323	1.16927	-2.08952	0.0366605	0.343584	42.0704	1.18744	5.29669	1.92798	5.80251	21.6289	4.3424
FBgn0035806	PGRP-SD	54.9679	1.25379	0.600214	2.0889	0.0367169	0.343725	28.9234	27.3111	108.053	45.5004	40.6176	28.1173	64.7235
FBgn0030451	CG15717	65.963	0.820733	0.393133	2.08767	0.0368276	0.343983	47.3292	41.5604	74.1537	65.5515	110.248	44.4448	83.3176
FBgn0034290	CG5773	62.7573	1.80304	0.863986	2.08688	0.0368989	0.343983	13.147	32.0609	96.3998	31.6189	121.853	22.6039	83.2905
FBgn0039239	CG13641	148.897	1.26522	0.605975	2.08791	0.0368062	0.343983	52.588	117.556	278.606	90.2297	261.113	85.0723	209.983
FBgn0040607	CG14244	142.066	-3.27113	1.56772	-2.08656	0.0369283	0.343983	189.317	51.0599	24.3648	1.54239	11.605	120.188	12.5041
FBgn0263200	Galt	86.5592	-0.969161	0.464536	-2.0863	0.0369513	0.343983	84.1408	125.869	52.9669	62.4667	40.6176	105.005	52.0171
FBgn0264493	rdx	251.875	0.620621	0.297554	2.08574	0.0370018	0.344067	168.282	185.241	347.463	261.82	185.68	176.761	264.988
FBgn0031855	meng	17.8194	1.90201	0.913003	2.08325	0.0372284	0.345787	7.8882	3.56232	19.0681	23.907	11.605	5.72526	18.1934
FBgn0052425	CG32425	246.999	-0.59694	0.286808	-2.08132	0.0374042	0.347033	341.822	324.171	180.088	260.278	214.693	332.997	218.353
FBgn0025879	Timp	27.7007	1.49669	0.719324	2.08069	0.0374622	0.347183	7.8882	16.6242	34.9582	18.8942	69.6301	12.2562	41.1609
FBgn0004034	y	5.89386	-3.97382	1.91189	-2.07848	0.0376652	0.348288	0	7.12464	0	0	0	3.56232	0
FBgn0037521	CG2993	19.2181	3.73335	1.79595	2.07876	0.0376398	0.348288	2.6294	3.56232	116.527	1.15679	5.80251	3.09586	41.1622
FBgn0010315	CycD	100.728	0.899984	0.433228	2.07739	0.0377656	0.348441	52.588	66.4966	122.883	148.84	40.6176	59.5423	104.114
FBgn0034269	Hyccin	26.0703	1.28854	0.620211	2.07759	0.0377473	0.348441	7.8882	22.5613	28.6021	26.2206	87.0377	15.2248	47.2868
FBgn0023215	Mnt	132.938	-0.724177	0.34872	-2.07667	0.0378317	0.348664	176.17	165.054	154.663	83.6745	52.2226	170.612	96.8535
FBgn0266723	Trs31	55.134	-1.2989	0.625622	-2.07617	0.0378783	0.348707	102.547	77.1836	41.3142	49.3564	5.80251	89.8651	32.1577
FBgn0035173	CG13907	309.305	0.677186	0.32628	2.07547	0.0379427	0.348914	286.605	308.734	561.45	307.706	580.251	297.669	483.136
FBgn0000394	cv	29.5128	1.84001	0.886968	2.07449	0.0380335	0.349362	15.7764	8.31208	65.679	31.6189	23.21	12.0442	40.1693
FBgn0014031	Spat	193.792	0.870446	0.419709	2.07393	0.0380861	0.349459	184.058	224.426	494.711	209.379	429.386	204.242	377.825
FBgn0026317	Tsc1	43.8439	-1.06837	0.515543	-2.07232	0.0382358	0.349988	105.176	56.9971	31.7802	53.2124	17.4075	81.0866	34.1334
FBgn0039896	yellow-h	56.2333	1.13473	0.547799	2.07144	0.0383181	0.349988	13.147	40.3729	33.8988	71.3354	92.8402	26.76	66.0248
FBgn0051251	CG31251	7.48085	2.11969	1.02294	2.07215	0.0382518	0.349988	0	4.74976	14.8307	8.09754	23.21	2.37488	15.3794
FBgn0051992	gw	648.151	0.481992	0.232669	2.07158	0.0383046	0.349988	410.187	580.658	756.368	709.498	609.264	495.422	691.71
FBgn0053093	CG33093	13.0078	1.71995	0.830472	2.07105	0.0383543	0.349988	15.7764	3.56232	45.5516	11.9535	29.0126	9.66936	28.8392
FBgn0051957	CG31957	33.4509	1.34776	0.650928	2.07051	0.0384043	0.35006	13.147	17.8116	34.9582	35.4749	58.0251	15.4793	42.8194
FBgn0020443	eRF3	442.569	0.660556	0.31949	2.06753	0.0386844	0.351073	228.758	333.67	279.665	456.547	638.276	281.214	458.163
FBgn0036816	Indy	69.8349	0.89155	0.431134	2.06792	0.0386475	0.351073	65.735	30.8734	86.8658	76.3482	98.6427	48.3042	87.2856
FBgn0052082	IRSp53	25.2555	1.68599	0.815223	2.06813	0.0386275	0.351073	7.8882	14.2493	51.9076	24.6782	34.8151	11.0687	37.1336
FBgn0262141	CG42867	8.60303	3.46247	1.67365	2.06882	0.0385632	0.351073	0	1.18744	19.0681	5.01276	0	0.59372	8.02695
FBgn0028371	jbug	55.9344	-1.44908	0.701048	-2.06701	0.0387328	0.351092	149.876	58.1845	47.6702	45.1148	11.605	104.03	34.7967
FBgn0036806	Cyp12c1	12.8081	1.66277	0.80459	2.06661	0.0387709	0.351092	5.2588	11.8744	42.3735	13.4959	34.8151	8.5666	30.2282
FBgn0005695	gcl	43.2296	0.971573	0.471026	2.06268	0.0391435	0.351262	28.9234	29.686	42.3735	62.4667	75.4326	29.3047	60.091
FBgn0029944	Dok	56.6321	0.855541	0.414779	2.06264	0.0391466	0.351262	34.1822	33.2483	64.6197	63.6235	46.4201	33.7153	58.2211
FBgn0030432	CG4404	26.5145	1.90851	0.924723	2.06387	0.0390303	0.351262	7.8882	9.49951	16.9494	31.2334	58.0251	8.69386	35.4026
FBgn0032233	dpr19	124.384	0.812616	0.3941	2.06195	0.0392122	0.351262	78.882	110.432	100.637	192.413	226.298	94.6569	173.116
FBgn0033139	Tsp42Er	7.15858	3.18136	1.54215	2.06293	0.039119	0.351262	5.2588	0	15.8901	6.16955	40.6176	2.6294	20.8924
FBgn0036331	CG14117	17.7802	1.74491	0.844978	2.06503	0.0389201	0.351262	10.5176	7.12464	16.9494	15.0383	69.6301	8.82112	33.8726
FBgn0036974	eRF1	413.81	0.5835	0.282947	2.06223	0.0391862	0.351262	347.081	315.859	361.234	420.686	754.326	331.47	512.082
FBgn0037635	CG9837	72.6321	1.18629	0.574251	2.0658	0.0388476	0.351262	34.1822	72.4338	170.554	62.8523	145.063	53.308	126.156
FBgn0039137	CG13604	14.9622	1.9807	0.959802	2.06365	0.0390506	0.351262	2.6294	8.31208	41.3142	18.1231	5.80251	5.47074	21.7466
FBgn0262531	CG43085	23.7539	1.63867	0.794701	2.06199	0.0392082	0.351262	2.6294	29.686	48.7296	18.8942	110.248	16.1577	59.2905
FBgn0053547	Rim	34.0965	2.19163	1.06352	2.06072	0.0393294	0.351641	21.0352	8.31208	135.595	52.0556	0	14.6736	62.5503
FBgn0260858	Ykt6	76.9754	-0.779723	0.378392	-2.06062	0.0393391	0.351641	128.841	91.4328	77.3317	63.6235	34.8151	110.137	58.5901
FBgn0017558	Pdk	136.577	0.678034	0.329752	2.0562	0.0397635	0.353408	126.211	102.12	195.978	130.717	237.903	114.166	188.199
FBgn0025637	SkpA	749.309	0.484034	0.235595	2.05452	0.0399257	0.353408	539.027	629.343	769.08	703.714	1021.24	584.185	831.345
FBgn0028506	CG4455	154.596	0.931978	0.453707	2.05414	0.0399619	0.353408	84.1408	77.1836	207.63	129.175	116.05	80.6622	150.952
FBgn0029887	CG3198	456.984	-0.600113	0.29163	-2.05779	0.0396106	0.353408	631.056	458.352	323.098	472.356	249.508	544.704	348.321
FBgn0030608	Lsd-2	190.555	0.536577	0.261186	2.05438	0.0399386	0.353408	120.952	173.366	271.191	193.57	174.075	147.159	212.945
FBgn0032075	Tsp29Fb	17.1501	-2.7973	1.36038	-2.05627	0.0397564	0.353408	55.2174	16.6242	3.17802	9.25433	0	35.9208	4.14411
FBgn0036677	CG13023	9923.35	-1.18971	0.578847	-2.05531	0.0398494	0.353408	16988.6	11810.3	7750.12	4308.27	6881.78	14399.4	6313.39
FBgn0036764	CG5535	17.2807	1.59822	0.777469	2.05567	0.0398147	0.353408	5.2588	10.687	16.9494	26.2206	40.6176	7.97288	27.9292
FBgn0051636	CG31636	44.2767	1.38126	0.67225	2.05468	0.0399102	0.353408	26.294	28.4985	61.4416	48.5852	116.05	27.3963	75.359
FBgn0264503	CG43902	30.7047	2.63045	1.27859	2.05731	0.0396565	0.353408	23.6646	3.56232	183.266	38.1741	17.4075	13.6135	79.6157
FBgn0020638	Lcp65Ag1	5.34308	-3.47787	1.6941	-2.05293	0.0400797	0.354073	13.147	4.74976	0	1.15679	0	8.94838	0.385597
FBgn0001258	Ldh	495.424	-1.05309	0.513222	-2.05192	0.0401776	0.3545	331.305	440.54	66.7383	284.185	208.89	385.922	186.605
FBgn0026630	nes	173.967	0.780105	0.380251	2.05155	0.0402133	0.3545	73.6232	130.618	108.053	214.006	226.298	102.121	182.786
FBgn0002865	Mst98Ca	14.6339	-2.34644	1.14578	-2.04789	0.0405704	0.356891	34.1822	36.8106	11.6527	6.16955	0	35.4964	5.94076
FBgn0011642	Zyx	170.64	0.931768	0.454979	2.04794	0.0405663	0.356891	65.735	116.369	222.461	188.557	104.445	91.052	171.821
FBgn0028572	qtc	11.3492	3.70341	1.80989	2.04621	0.0407362	0.357434	0	2.37488	50.8483	2.31358	0	1.18744	17.7206
FBgn0036036	CG14174	10.4556	-2.18897	1.0699	-2.04595	0.0407612	0.357434	34.1822	16.6242	8.47471	5.01276	0	25.4032	4.49582
FBgn0040512	zetaCOP	67.0073	0.924282	0.451741	2.04605	0.0407519	0.357434	55.2174	29.686	94.2811	56.2972	87.0377	42.4517	79.2053
FBgn0003090	pk	54.2898	-1.22045	0.597147	-2.0438	0.0409732	0.358915	126.211	54.6222	28.6021	45.5004	40.6176	90.4167	38.2401
FBgn0033688	Prp8	236.734	-0.838966	0.41081	-2.04223	0.0411291	0.359901	386.522	298.047	150.426	317.732	75.4326	342.285	181.197
FBgn0000228	Bsg25D	75.4881	-0.852981	0.418453	-2.03841	0.0415085	0.360942	152.505	93.8077	49.7889	87.5305	58.0251	123.156	65.1148
FBgn0030362	regucalcin	860.091	0.666251	0.326782	2.03882	0.0414675	0.360942	896.626	932.14	1845.37	952.039	1566.68	914.383	1454.69
FBgn0039167	CG17786	24.7538	-1.62188	0.79558	-2.03862	0.0414884	0.360942	36.8116	39.1855	18.0088	12.7247	0	37.9986	10.2445
FBgn0051538	CG31538	7.88645	-2.7692	1.35713	-2.04048	0.041303	0.360942	23.6646	17.8116	4.23735	3.08478	0	20.7381	2.44071
FBgn0265434	zip	596.999	-0.488234	0.239394	-2.03946	0.0414044	0.360942	899.255	821.708	593.23	616.184	632.474	860.482	613.962
FBgn0285952	eEF5	7270.58	0.5236	0.256758	2.03928	0.0414226	0.360942	4677.7	5465.78	6562.6	5363.27	10003.5	5071.74	7309.8
FBgn0031390	tho2	100.619	-0.78069	0.383196	-2.03731	0.041619	0.361205	270.828	137.743	72.035	120.306	179.878	204.286	124.073
FBgn0266717	Bruce	166.601	-0.659864	0.323901	-2.03724	0.0416257	0.361205	249.793	188.803	145.129	166.578	75.4326	219.298	129.047
FBgn0003502	Btk29A	379.476	0.637145	0.312889	2.03633	0.0417171	0.36137	286.605	314.671	621.832	417.601	348.151	300.638	462.528
FBgn0266227	lncRNA:CR44922	24.0708	2.29232	1.12579	2.03619	0.0417316	0.36137	7.8882	11.8744	115.468	11.5679	17.4075	9.8813	48.1478
FBgn0029712	CG15912	10.3778	2.11243	1.03794	2.03521	0.0418293	0.361839	2.6294	2.37488	8.47471	10.4111	17.4075	2.50214	12.0978
FBgn0000250	cact	469.172	-0.552824	0.271811	-2.03386	0.0419661	0.362521	344.452	600.844	279.665	360.919	336.546	472.648	325.71
FBgn0032036	CG13384	35.3942	1.37598	0.676636	2.03357	0.0419954	0.362521	7.8882	34.4357	84.7471	26.6062	69.6301	21.162	60.3278
FBgn0001189	hfw	96.6014	0.723288	0.355829	2.03268	0.0420847	0.362915	44.6998	73.6212	82.6284	96.0136	145.063	59.1605	107.902
FBgn0085390	Dgk	10.2094	-1.83593	0.903436	-2.03217	0.0421368	0.362988	31.5528	15.4367	12.7121	3.47037	0	23.4948	5.39415
FBgn0004590	Eig71Ec	5.9399	2.70985	1.33396	2.03143	0.0422117	0.363256	0	3.56232	28.6021	3.08478	11.605	1.78116	14.4306
FBgn0029715	CG11444	388.545	-0.44111	0.217391	-2.02911	0.0424473	0.363403	433.851	415.604	229.876	357.448	365.558	424.727	317.628
FBgn0033446	CG1648	579.089	-0.626801	0.308896	-2.02916	0.0424417	0.363403	402.298	505.849	190.681	424.157	255.311	454.074	290.049
FBgn0037228	CG1092	44.2294	1.60509	0.790889	2.02947	0.0424106	0.363403	13.147	36.8106	119.705	55.526	58.0251	24.9788	77.7521
FBgn0039849	CG11334	131.896	-0.75161	0.370149	-2.03056	0.0422996	0.363403	178.799	201.865	90.0438	119.535	139.26	190.332	116.28
FBgn0053963	lncRNA:CR33963	9.08182	3.08411	1.51985	2.02922	0.0424359	0.363403	0	2.37488	25.4241	5.01276	5.80251	1.18744	12.0798
FBgn0085279	CG34250	15.1973	2.57327	1.26854	2.02853	0.042506	0.363531	0	2.37488	11.6527	10.4111	0	1.18744	7.35461
FBgn0267913	lncRNA:CR46194	6.58154	-2.01957	0.996002	-2.02767	0.0425938	0.363908	10.5176	20.1865	5.29669	3.85597	0	15.352	3.05089
FBgn0015396	jumu	47.7327	1.21148	0.598013	2.02584	0.0427817	0.364018	34.1822	39.1855	146.189	55.9116	46.4201	36.6839	82.8401
FBgn0025885	Inos	166.331	-0.599627	0.295999	-2.02577	0.042788	0.364018	194.576	225.613	125.002	152.311	139.26	210.095	138.858
FBgn0027101	Dyrk3	192.336	0.549941	0.271377	2.02649	0.042715	0.364018	149.876	153.18	290.259	187.4	174.075	151.528	217.245
FBgn0031627	fipi	9.99704	2.66356	1.31507	2.02541	0.0428256	0.364018	0	3.56232	25.4241	5.01276	11.605	1.78116	14.014
FBgn0265464	Traf6	40.8272	0.938215	0.463072	2.02607	0.0427578	0.364018	26.294	29.686	70.9757	43.1869	46.4201	27.99	53.5275
FBgn0002565	Lsp2	11676.1	0.65609	0.324417	2.02236	0.0431387	0.364745	14193.5	13203.1	29482.5	13044.7	22235.2	13698.3	21587.5
FBgn0031561	IM33	29.6562	1.73574	0.858612	2.02156	0.0432213	0.364745	5.2588	14.2493	32.8395	13.1103	69.6301	9.75404	38.5266
FBgn0033366	Ance-4	289.412	0.785769	0.388246	2.02389	0.0429812	0.364745	318.158	337.233	786.029	329.3	586.054	327.695	567.128
FBgn0036135	mRpL2	145.158	-0.598239	0.295987	-2.02117	0.0432622	0.364745	168.282	151.992	95.3405	101.412	133.458	160.137	110.07
FBgn0037012	Rcd2	16.8745	1.73923	0.859464	2.02362	0.0430093	0.364745	5.2588	13.0618	51.9076	9.25433	40.6176	9.16032	33.9265
FBgn0039135	CG13603	22.8729	1.08387	0.53577	2.02301	0.0430722	0.364745	13.147	17.8116	48.7296	23.5214	29.0126	15.4793	33.7545
FBgn0039623	CG1951	13.0872	1.89718	0.938559	2.02138	0.0432408	0.364745	0	8.31208	25.4241	19.6654	5.80251	4.15604	16.964
FBgn0051998	CG31998	137.436	0.702156	0.347243	2.02209	0.0431675	0.364745	113.064	83.1208	192.8	134.959	139.26	98.0925	155.673
FBgn0035155	RabX6	26.9055	-0.903836	0.447324	-2.02054	0.0433277	0.364928	42.0704	49.8725	29.6615	20.051	29.0126	45.9714	26.2417
FBgn0003141	pr	134.139	0.710467	0.352048	2.01809	0.0435814	0.365951	84.1408	106.87	188.562	130.717	156.668	95.5052	158.649
FBgn0003345	sd	1141.74	-0.590964	0.293252	-2.01521	0.0438826	0.365951	957.102	1294.31	586.874	988.671	655.684	1125.71	743.743
FBgn0003676	CCT1	976.223	-0.649323	0.32228	-2.01478	0.0439278	0.365951	1477.72	1401.18	561.45	974.789	1241.74	1439.45	925.992
FBgn0004363	porin	10165.8	-0.700676	0.347902	-2.014	0.044009	0.365951	8955.74	9505.45	2924.83	7392.66	6730.91	9230.6	5682.8
FBgn0029905	Nf-YC	49.264	-0.866095	0.430004	-2.01415	0.0439934	0.365951	63.1056	70.0589	33.8988	43.9581	23.21	66.5823	33.689
FBgn0031574	TTLL4B	16.4081	-1.63385	0.810933	-2.01478	0.0439281	0.365951	39.441	15.4367	6.35603	9.25433	11.605	27.4389	9.07179
FBgn0031972	Wwox	55.304	0.873329	0.432813	2.0178	0.0436122	0.365951	31.5528	40.3729	69.9164	49.742	98.6427	35.9629	72.767
FBgn0032253	LManI	42.6735	1.20959	0.600276	2.01506	0.0438983	0.365951	42.0704	22.5613	96.3998	43.5725	81.2352	32.3159	73.7358
FBgn0032938	CG8671	119.786	0.751364	0.373054	2.01409	0.0440002	0.365951	44.6998	98.5575	163.138	117.607	81.2352	71.6286	120.66
FBgn0034103	prim	7.62648	5.69733	2.82573	2.01624	0.0437751	0.365951	0	0	48.7296	0.771194	0	0	16.5003
FBgn0036857	Aldh7A1	60.9696	1.01031	0.50114	2.01602	0.0437979	0.365951	57.8468	66.4966	136.655	75.577	179.878	62.1717	130.703
FBgn0040010	CG17493	123.573	1.16607	0.579136	2.01347	0.0440655	0.365951	47.3292	96.1826	220.342	124.162	145.063	71.7559	163.189
FBgn0261243	Psa	223.815	-0.539466	0.267923	-2.01351	0.0440607	0.365951	336.563	260.049	137.714	251.024	226.298	298.306	205.012
FBgn0284435	tyn	365.835	-1.37769	0.682704	-2.01799	0.0435924	0.365951	504.845	182.866	226.698	92.5433	69.6301	343.855	129.624
FBgn0031549	Spindly	7.23998	-2.14531	1.06571	-2.01303	0.0441111	0.365964	28.9234	21.3739	8.47471	5.39836	0	25.1487	4.62436
FBgn0013751	Awh	5.10232	3.62184	1.80126	2.01073	0.0443539	0.366151	0	0	5.29669	4.24157	0	0	3.17942
FBgn0030157	CG1468	84.9764	1.22118	0.607186	2.01122	0.0443023	0.366151	73.6232	73.6212	265.894	87.1449	162.47	73.6222	171.836
FBgn0031281	Saf6	23.0745	-1.15829	0.575953	-2.01108	0.0443166	0.366151	49.9586	46.3101	14.8307	30.8478	11.605	48.1344	19.0945
FBgn0033380	Phax	34.007	1.01236	0.50315	2.01204	0.0442158	0.366151	15.7764	18.999	42.3735	30.8478	34.8151	17.3877	36.0121
FBgn0052677	X11Lbeta	18.2533	2.87098	1.42757	2.0111	0.0443154	0.366151	5.2588	2.37488	60.3823	14.6527	0	3.81684	25.0117
FBgn0267036	lncRNA:CR45480	5.63894	3.77333	1.87706	2.01024	0.0444061	0.366218	2.6294	1.18744	8.47471	1.15679	69.6301	1.90842	26.4205
FBgn0010422	TfIIS	239.795	-0.504248	0.25099	-2.00904	0.0445334	0.366904	368.116	295.672	209.749	226.731	278.521	331.894	238.334
FBgn0086129	snama	75.8267	-0.77577	0.386531	-2.00701	0.044749	0.368315	118.323	115.182	63.5603	85.2169	40.6176	116.752	63.1316
FBgn0014455	Ahcy	842.849	-0.662993	0.330695	-2.00485	0.0449795	0.369481	1183.23	1120.94	426.913	776.978	1003.83	1152.09	735.909
FBgn0024184	unc-4	5.22536	3.99184	1.99075	2.00519	0.0449426	0.369481	0	0	9.53405	3.85597	0	0	4.46334
FBgn0032781	RtcB	152.136	-0.779657	0.389103	-2.00373	0.0450993	0.370099	202.464	151.992	45.5516	105.654	185.68	177.228	112.295
FBgn0011259	Sema1a	321.474	0.733207	0.36609	2.00281	0.0451979	0.370294	152.505	295.672	552.975	321.973	237.903	224.089	370.95
FBgn0025807	Rad9	16.522	-1.38412	0.691133	-2.00268	0.0452121	0.370294	36.8116	29.686	11.6527	17.7375	0	33.2488	9.79673
FBgn0265045	Strn-Mlck	509.751	-0.992933	0.495926	-2.00218	0.0452652	0.370364	699.421	1027.14	219.283	512.844	580.251	863.278	437.459
FBgn0019982	Gs1l	43.1528	-1.18327	0.592055	-1.99857	0.0456545	0.371051	44.6998	45.1227	9.53405	33.5469	5.80251	44.9113	16.2945
FBgn0034706	CG11275	43.6992	-1.13033	0.56555	-1.99864	0.0456474	0.371051	110.435	48.685	40.2549	37.7885	23.21	79.5599	33.7511
FBgn0038893	Archease	46.196	1.12878	0.564664	1.99903	0.0456049	0.371051	42.0704	18.999	68.857	37.0173	98.6427	30.5347	68.1723
FBgn0039861	pasha	24.2969	-1.21025	0.605022	-2.00034	0.0454634	0.371051	23.6646	39.1855	16.9494	15.8095	0	31.4251	10.9196
FBgn0250791	alphaSnap	256.595	0.831848	0.416014	1.99957	0.0455468	0.371051	199.834	197.115	445.982	176.989	452.596	198.475	358.522
FBgn0261086	Syt14	6.23518	2.97193	1.48708	1.99851	0.0456616	0.371051	0	3.56232	27.5428	10.4111	11.605	1.78116	16.5196
FBgn0267588	asRNA:CR45926	26.2634	-1.39728	0.698748	-1.99969	0.0455334	0.371051	60.4762	34.4357	11.6527	15.4239	34.8151	47.456	20.6306
FBgn0002869	MtnB	84.4507	-1.63536	0.820126	-1.99404	0.0461475	0.372089	21.0352	20.1865	8.47471	3.85597	11.605	20.6108	7.97857
FBgn0017578	Max	82.9326	-0.724677	0.363283	-1.9948	0.0460646	0.372089	144.617	91.4328	63.5603	55.1404	116.05	118.025	78.2503
FBgn0026061	Mipp1	56.8204	-1.22823	0.615752	-1.99468	0.0460782	0.372089	26.294	67.684	28.6021	17.7375	11.605	46.989	19.3149
FBgn0026076	UBL3	133.646	0.641611	0.321555	1.99534	0.0460059	0.372089	68.3644	112.807	165.257	153.468	98.6427	90.5856	139.122
FBgn0028327	l(1)G0320	454.603	0.555261	0.278111	1.99655	0.0458745	0.372089	362.857	296.86	608.06	424.928	400.373	329.859	477.787
FBgn0085407	Pvf3	118.541	1.07251	0.53778	1.99434	0.0461151	0.372089	65.735	100.932	276.487	87.5305	168.273	83.3337	177.43
FBgn0250830	CG12547	148.742	0.840798	0.421349	1.99549	0.045989	0.372089	99.9172	112.807	207.63	241.384	104.445	106.362	184.486
FBgn0264816	koko	107.78	-0.706083	0.354006	-1.99455	0.0460917	0.372089	147.246	85.4956	58.2636	64.3947	104.445	116.371	75.7012
FBgn0032260	CG13144	622.37	-0.93913	0.47111	-1.99344	0.0462132	0.372258	318.158	454.789	85.8064	347.808	162.47	386.473	198.695
FBgn0026326	Mad1	77.2277	-0.740446	0.371523	-1.993	0.0462614	0.372286	168.282	112.807	77.3317	94.8568	69.6301	140.544	80.6062
FBgn0033710	CG17739	15.5378	1.77553	0.892409	1.9896	0.0466352	0.374026	0	15.4367	55.0856	19.6654	11.605	7.71836	28.7854
FBgn0034908	CG5543	31.192	-0.98157	0.493401	-1.98939	0.0466577	0.374026	76.2526	58.1845	42.3735	35.4749	11.605	67.2186	29.8178
FBgn0264554	asRNA:CR43933	5.77489	-2.21531	1.11313	-1.99016	0.0465734	0.374026	15.7764	11.8744	2.11868	4.24157	0	13.8254	2.12008
FBgn0267164	asRNA:CR45604	11.9385	-2.21486	1.11327	-1.98952	0.0466442	0.374026	81.5114	30.8734	14.8307	6.16955	17.4075	56.1924	12.8026
FBgn0264986	asRNA:CR44137	18.0693	1.90546	0.958674	1.9876	0.0468556	0.375251	0	17.8116	41.3142	14.2671	63.8276	8.9058	39.803
FBgn0036501	CG7272	77.594	0.827971	0.416745	1.98676	0.0469495	0.375641	28.9234	59.372	85.8064	58.2251	121.853	44.1477	88.6281
FBgn0032713	Ugt36D1	67.6852	0.975945	0.491403	1.98604	0.0470289	0.375845	23.6646	78.371	165.257	77.1194	63.8276	51.0178	102.068
FBgn0036155	CG6163	37.185	0.893538	0.449984	1.98571	0.0470653	0.375845	18.4058	27.3111	41.3142	39.7165	63.8276	22.8585	48.2861
FBgn0037756	CG8507	103.406	0.650174	0.327638	1.98443	0.047208	0.376279	57.8468	87.8705	146.189	93.3145	116.05	72.8587	118.518
FBgn0051715	CG31715	83.7899	0.747101	0.376485	1.98441	0.0472102	0.376279	55.2174	42.7478	90.0438	61.3099	104.445	48.9826	85.2663
FBgn0030234	CG15211	15.9233	3.01258	1.51898	1.9833	0.0473345	0.376907	0	2.37488	23.3055	5.39836	5.80251	1.18744	11.5021
FBgn0030766	mthl1	94.0129	1.15069	0.580313	1.98288	0.0473804	0.376912	15.7764	28.4985	76.2724	57.4539	0	22.1375	44.5754
FBgn0025682	scf	180.869	0.79587	0.4016	1.98175	0.0475075	0.377284	123.582	218.489	435.388	187.4	278.521	171.035	300.436
FBgn0050197	CG30197	108.214	1.01154	0.510454	1.98165	0.0475179	0.377284	97.2878	65.3092	234.114	87.1449	168.273	81.2985	163.177
FBgn0015795	Rab7	268.149	0.633061	0.31964	1.98054	0.0476424	0.377911	163.023	257.674	400.43	271.46	319.138	210.349	330.343
FBgn0030855	CG5800	29.3301	1.3125	0.663559	1.97797	0.0479322	0.378431	15.7764	10.687	18.0088	28.1486	63.8276	13.2317	36.6617
FBgn0030973	CG7332	180.186	-0.446032	0.225446	-1.97844	0.0478785	0.378431	294.493	236.3	203.393	194.726	168.273	265.397	188.797
FBgn0036999	isoQC	8.90164	2.37338	1.19995	1.97789	0.0479411	0.378431	7.8882	0	24.3648	7.32634	17.4075	3.9441	16.3662
FBgn0037875	ZnT86D	24.2775	1.26034	0.637459	1.97713	0.0480265	0.378431	5.2588	16.6242	25.4241	34.7037	23.21	10.9415	27.7793
FBgn0038840	Grik	13.2691	-1.54561	0.781053	-1.97888	0.0478294	0.378431	18.4058	11.8744	4.23735	4.24157	11.605	15.1401	6.69465
FBgn0085359	CG34330	73.4751	0.984238	0.497611	1.97793	0.0479371	0.378431	36.8116	56.9971	156.782	57.0683	63.8276	46.9044	92.5594
FBgn0264785	Hph	61.1977	-1.49765	0.757366	-1.97744	0.0479919	0.378431	155.135	90.2454	51.9076	45.1148	29.0126	122.69	42.0117
FBgn0032946	nrv3	302.084	2.41093	1.21994	1.97628	0.0481233	0.378735	134.099	98.5575	1579.47	137.273	133.458	116.328	616.735
FBgn0052057	dpr10	12.8549	2.14892	1.08752	1.97599	0.0481563	0.378735	0	8.31208	43.4329	15.4239	0	4.15604	19.6189
FBgn0028894	GMF	31.8503	1.65102	0.83646	1.97382	0.0484025	0.37982	13.147	14.2493	87.9251	27.3774	5.80251	13.6981	40.3683
FBgn0032197	ova	62.2327	0.927437	0.469979	1.97336	0.0484546	0.37982	23.6646	42.7478	95.3405	64.7803	17.4075	33.2062	59.1761
FBgn0038659	EndoA	92.9966	0.809633	0.410323	1.97316	0.0484769	0.37982	81.5114	51.0599	163.138	86.7593	81.2352	66.2857	110.378
FBgn0040001	FASN3	43.3183	2.63557	1.3353	1.97377	0.0484081	0.37982	15.7764	13.0618	211.868	45.886	5.80251	14.4191	87.8521
FBgn0035763	mrva	205.037	0.692636	0.351257	1.97188	0.0486235	0.380609	220.87	200.677	375.006	229.43	435.188	210.773	346.541
FBgn0261549	rdgA	300.033	-0.586242	0.297484	-1.97066	0.0487623	0.381337	294.493	325.358	201.274	210.922	208.89	309.926	207.029
FBgn0015602	BEAF-32	125.21	0.501065	0.25432	1.97021	0.048814	0.381382	126.211	105.682	169.494	160.023	150.865	115.947	160.127
FBgn0042132	CG18809	20.8955	-1.14526	0.581452	-1.96966	0.0488776	0.381521	42.0704	23.7488	15.8901	12.3391	17.4075	32.9096	15.2122
FBgn0031538	CG3246	66.5561	1.36589	0.6937	1.96899	0.0489538	0.381757	26.294	68.8715	137.714	67.0939	179.878	47.5827	128.229
FBgn0034792	YME1L	129.49	-0.743171	0.377865	-1.96676	0.0492104	0.383398	199.834	172.179	70.9757	126.861	145.063	186.007	114.3
FBgn0000454	Dip-B	601.898	0.715561	0.363985	1.96591	0.0493092	0.383808	486.439	445.29	1080.53	603.845	597.659	465.864	760.676
FBgn0025574	Pli	441.767	0.653504	0.332951	1.96276	0.0496738	0.385388	318.158	404.917	586.874	657.057	452.596	361.537	565.509
FBgn0031047	Rcd-1	159.381	-0.568117	0.289478	-1.96256	0.0496976	0.385388	249.793	208.989	113.349	170.048	191.483	229.391	158.293
FBgn0031639	mRpS2	214.537	-0.695876	0.354441	-1.9633	0.0496109	0.385388	197.205	160.304	91.1031	152.311	63.8276	178.755	102.414
FBgn0038460	CG18622	21.7622	1.42167	0.72406	1.96347	0.0495914	0.385388	23.6646	9.49951	50.8483	23.1358	58.0251	16.5821	44.0031
FBgn0262617	Nuak1	866.678	-0.823385	0.419815	-1.96131	0.0498434	0.385799	759.897	790.835	239.411	590.349	487.411	775.366	439.057
FBgn0285913	red	100.316	0.66258	0.337786	1.96154	0.0498162	0.385799	81.5114	79.5584	138.773	94.8568	168.273	80.5349	133.968
FBgn0003326	sca	20.0811	2.46662	1.25851	1.95996	0.0500006	0.386296	5.2588	10.687	100.637	10.4111	23.21	7.97288	44.7528
FBgn0035192	CG9194	142.476	-1.0031	0.511776	-1.96004	0.0499911	0.386296	236.646	258.862	50.8483	164.264	162.47	247.754	125.861
FBgn0263933	ebi	80.0487	-0.682884	0.348612	-1.95887	0.0501285	0.386925	144.617	104.495	82.6284	89.8441	34.8151	124.556	69.0959
FBgn0014022	Rlb1	45.0981	-1.06477	0.543813	-1.95797	0.0502337	0.387236	63.1056	85.4956	18.0088	43.5725	52.2226	74.3006	37.9346
FBgn0035142	Hipk	308.073	0.526853	0.269115	1.95773	0.0502619	0.387236	289.234	207.802	421.617	306.164	330.743	248.518	352.841
FBgn0002873	mud	14.8142	2.59828	1.32834	1.95603	0.0504614	0.387518	0	7.12464	38.1362	13.1103	23.21	3.56232	24.8188
FBgn0010383	Cyp18a1	13.1931	3.66701	1.87406	1.95672	0.0503805	0.387518	0	1.18744	23.3055	5.39836	0	0.59372	9.56794
FBgn0015391	glu	21.373	-1.3364	0.683375	-1.95558	0.0505146	0.387518	57.8468	43.9353	13.7714	29.3054	11.605	50.891	18.2273
FBgn0026324	Taf10b	81.0771	0.857309	0.438556	1.95484	0.0506014	0.387518	47.3292	64.1217	117.587	69.4074	133.458	55.7255	106.817
FBgn0026427	Su(var)2-HP2	83.0044	-0.738532	0.377585	-1.95594	0.0504727	0.387518	115.694	132.993	106.993	54.7548	58.0251	124.343	73.2577
FBgn0034849	CG3500	93.1966	0.89077	0.455719	1.95465	0.0506248	0.387518	31.5528	83.1208	132.417	71.721	139.26	57.3368	114.466
FBgn0053192	MtnD	9.71898	4.91479	2.51404	1.95494	0.0505905	0.387518	0	0	1.05934	2.69918	29.0126	0	10.9237
FBgn0283521	lola	945.329	-0.463751	0.237361	-1.95378	0.0507275	0.387946	1083.31	1281.25	875.014	948.568	731.116	1182.28	851.566
FBgn0050338	CG30338	6.20761	-2.69024	1.37778	-1.95258	0.0508688	0.388312	18.4058	5.9372	0	3.47037	0	12.1715	1.15679
FBgn0086442	mib2	243.534	-0.686779	0.351719	-1.95264	0.0508624	0.388312	223.499	261.237	88.9845	205.523	156.668	242.368	150.392
FBgn0016685	Nlp	811.283	-0.438574	0.225438	-1.94543	0.0517234	0.38898	975.508	938.077	586.874	723.38	829.759	956.792	713.338
FBgn0025109	Bem46	28.2947	1.39333	0.714653	1.94966	0.0512168	0.38898	5.2588	22.5613	65.679	36.6317	5.80251	13.9101	36.0377
FBgn0027930	MP1	95.5748	0.74797	0.383548	1.95013	0.0511604	0.38898	70.9938	112.807	218.224	108.353	145.063	91.9003	157.213
FBgn0030003	CG2116	45.1346	0.872337	0.447977	1.94728	0.0515011	0.38898	26.294	41.5604	69.9164	45.5004	92.8402	33.9272	69.419
FBgn0032246	Wdfy2	184.918	0.536433	0.275037	1.9504	0.0511284	0.38898	155.135	143.68	269.072	164.264	220.495	149.407	217.944
FBgn0032726	CG10621	295.186	0.994154	0.510237	1.94842	0.0513653	0.38898	289.234	301.61	941.752	442.665	371.361	295.422	585.259
FBgn0033268	Obp44a	536.055	2.51819	1.29277	1.94789	0.0514275	0.38898	278.716	148.43	3218.27	137.658	307.533	213.573	1221.15
FBgn0033755	ClC-b	56.2782	0.905988	0.465649	1.94565	0.0516974	0.38898	31.5528	53.4348	118.646	55.9116	69.6301	42.4938	81.3959
FBgn0034035	CG8207	60.5784	0.833527	0.427191	1.95118	0.0510355	0.38898	55.2174	32.0609	59.323	82.1321	87.0377	43.6391	76.1643
FBgn0034114	CG4282	19.6809	1.24691	0.641152	1.9448	0.0517985	0.38898	15.7764	10.687	37.0769	35.0893	5.80251	13.2317	25.9896
FBgn0035756	unc-13-4A	8.42562	2.76127	1.41701	1.94865	0.0513368	0.38898	5.2588	0	20.1274	5.39836	17.4075	2.6294	14.3111
FBgn0035978	UGP	104.315	0.653513	0.335339	1.94882	0.0513173	0.38898	68.3644	84.3082	146.189	96.7848	127.655	76.3363	123.543
FBgn0038074	Gnmt	15.9448	2.35199	1.20907	1.94529	0.0517398	0.38898	2.6294	8.31208	25.4241	16.5807	52.2226	5.47074	31.4091
FBgn0039601	CG1523	47.5749	-0.88739	0.455606	-1.94772	0.051449	0.38898	60.4762	52.2473	36.0175	35.8605	0	56.3618	23.9593
FBgn0040239	bc10	70.059	0.891251	0.458223	1.94502	0.0517731	0.38898	36.8116	48.685	98.5185	43.9581	116.05	42.7483	86.1756
FBgn0052091	CG32091	39.0101	1.1724	0.602324	1.94645	0.0516003	0.38898	44.6998	14.2493	108.053	37.7885	34.8151	29.4745	60.2187
FBgn0261565	Lmpt	341.689	-0.588538	0.301704	-1.95071	0.051091	0.38898	336.563	331.296	167.376	243.697	266.916	333.929	225.996
FBgn0262559	Mdh2	1395.93	-0.525272	0.269931	-1.94595	0.0516605	0.38898	1277.89	1079.38	564.628	961.293	940.007	1178.64	821.976
FBgn0028993	scro	10.4575	3.50125	1.80068	1.94441	0.051846	0.388986	2.6294	2.37488	49.7889	31.6189	0	2.50214	27.136
FBgn0046704	Liprin-alpha	81.3449	0.65035	0.334561	1.94389	0.0519084	0.389102	47.3292	67.684	84.7471	102.569	87.0377	57.5066	91.4512
FBgn0005585	Calr	648.027	0.443781	0.228391	1.94308	0.052007	0.38914	562.692	723.151	826.284	931.217	876.179	642.921	877.893
FBgn0264389	opm	71.6992	-0.793349	0.408247	-1.94331	0.0519791	0.38914	60.4762	94.9951	31.7802	52.8268	58.0251	77.7357	47.544
FBgn0036580	PDCD-5	328.306	-0.626678	0.322649	-1.94229	0.0521022	0.389283	362.857	377.606	149.367	232.901	371.361	370.232	251.209
FBgn0036710	CG6479	36.4249	-1.20656	0.62125	-1.94214	0.0521198	0.389283	60.4762	28.4985	10.5934	32.7757	0	44.4874	14.4564
FBgn0035449	CG14971	5.54211	2.47903	1.27671	1.94173	0.0521697	0.389306	0	3.56232	8.47471	4.62716	34.8151	1.78116	15.9723
FBgn0015283	Rpn10	392.431	-0.465168	0.239807	-1.93976	0.0524089	0.389428	533.768	374.043	290.259	345.109	348.151	453.906	327.84
FBgn0015776	nrv1	66.1918	1.20658	0.622334	1.9388	0.0525254	0.389428	44.6998	32.0609	154.663	66.7083	29.0126	38.3803	83.4614
FBgn0032588	CG5968	6.85166	-3.56571	1.83899	-1.93895	0.0525071	0.389428	28.9234	2.37488	2.11868	0.771194	0	15.6491	0.96329
FBgn0035853	UbcE2M	216.132	-0.443941	0.229004	-1.93857	0.0525532	0.389428	318.158	273.111	220.342	175.061	290.126	295.634	228.51
FBgn0036667	kud	62.5265	1.02483	0.528496	1.93914	0.0524847	0.389428	15.7764	37.9981	56.145	56.2972	63.8276	26.8872	58.7566
FBgn0037472	CG10098	37.292	1.63878	0.844846	1.93974	0.0524118	0.389428	15.7764	24.9362	136.655	23.1358	29.0126	20.3563	62.9344
FBgn0038989	CG6937	105.887	-0.821435	0.423745	-1.93851	0.0525608	0.389428	113.064	134.181	41.3142	90.6153	81.2352	123.622	71.0549
FBgn0051453	pch2	228.089	-0.481028	0.248106	-1.9388	0.052526	0.389428	247.164	265.986	146.189	214.777	191.483	256.575	184.15
FBgn0001114	Glt	343.886	0.717952	0.37044	1.93811	0.0526104	0.389448	362.857	384.73	826.284	443.822	574.449	373.794	614.852
FBgn0002914	Myb	96.4134	0.777953	0.402119	1.93464	0.0530349	0.39163	57.8468	92.6203	171.613	104.882	116.05	75.2335	130.848
FBgn0002924	ncd	36.6978	-1.09809	0.568073	-1.93301	0.0532349	0.39163	113.064	80.7459	32.8395	45.1148	63.8276	96.9051	47.2607
FBgn0003900	twi	36.3942	-1.14301	0.59111	-1.93366	0.0531549	0.39163	97.2878	72.4338	45.5516	46.2716	11.605	84.8608	34.4761
FBgn0023416	Ac3	6.49539	4.12778	2.13366	1.9346	0.0530393	0.39163	0	1.18744	37.0769	3.85597	0	0.59372	13.6443
FBgn0035770	pst	71.1358	0.812483	0.42027	1.93324	0.0532064	0.39163	86.7702	47.4976	134.536	116.45	81.2352	67.1339	110.74
FBgn0037028	CG3618	19.4505	2.97791	1.54053	1.93304	0.0532316	0.39163	2.6294	7.12464	75.213	5.01276	40.6176	4.87702	40.2811
FBgn0037525	CG17816	105.961	1.58511	0.819805	1.93352	0.0531717	0.39163	73.6232	54.6222	412.083	86.3737	69.6301	64.1227	189.362
FBgn0085437	CG34408	31.1122	-0.975268	0.504786	-1.93204	0.0533542	0.39216	36.8116	45.1227	18.0088	28.1486	5.80251	40.9672	17.3199
FBgn0004242	Syt1	89.7168	1.4153	0.733492	1.92954	0.0536644	0.392758	78.882	49.8725	345.344	67.4795	92.8402	64.3772	168.555
FBgn0010350	Cds	33.4963	0.972298	0.503533	1.93095	0.0534891	0.392758	15.7764	22.5613	51.9076	34.3181	23.21	19.1689	36.4786
FBgn0033177	CG11141	10.2365	2.66728	1.38161	1.93055	0.0535384	0.392758	0	2.37488	12.7121	8.86873	5.80251	1.18744	9.12777
FBgn0033550	CG12341	39.2018	1.35093	0.700152	1.92948	0.0536718	0.392758	10.5176	17.8116	68.857	23.907	11.605	14.1646	34.7897
FBgn0035356	CG16986	51.5099	0.968348	0.50174	1.92998	0.0536095	0.392758	26.294	28.4985	56.145	35.4749	87.0377	27.3963	59.5525
FBgn0029974	dpr14	15.8308	2.88003	1.49322	1.92874	0.0537632	0.393081	2.6294	4.74976	75.213	5.78395	0	3.68958	26.999
FBgn0028888	CG4168	10.7644	3.47973	1.80536	1.92744	0.0539244	0.393475	2.6294	1.18744	55.0856	1.92798	0	1.90842	19.0045
FBgn0039218	Rpb10	47.2749	1.14471	0.593753	1.92792	0.0538649	0.393475	26.294	14.2493	54.0263	30.4622	46.4201	20.2716	43.6362
FBgn0250746	Prosbeta7	433.838	-0.38743	0.201036	-1.92717	0.053959	0.393475	404.928	448.852	323.098	355.135	284.323	426.89	320.852
FBgn0004369	Ptp99A	254.978	0.515879	0.26785	1.926	0.0541042	0.393498	212.981	184.053	382.421	224.032	226.298	198.517	277.584
FBgn0031216	Zir	157.087	0.458385	0.237985	1.9261	0.0540914	0.393498	144.617	150.805	199.156	221.333	174.075	147.711	198.188
FBgn0266557	kis	408.739	-0.653472	0.339224	-1.92637	0.0540579	0.393498	709.938	505.849	380.303	396.779	377.163	607.894	384.748
FBgn0038598	CG7131	6.42207	-3.01869	1.56788	-1.92533	0.0541884	0.393766	7.8882	9.49951	2.11868	0.385597	0	8.69386	0.834758
FBgn0011206	bol	589.371	-0.729261	0.379204	-1.92313	0.0544633	0.395418	683.644	820.521	338.988	442.28	597.659	752.082	459.642
FBgn0031304	CG4552	49.8581	-0.944865	0.491562	-1.92217	0.0545843	0.39595	78.882	56.9971	42.3735	30.8478	29.0126	67.9396	34.078
FBgn0031736	CG11030	48.9396	1.21843	0.63405	1.92165	0.0546493	0.396076	42.0704	22.5613	132.417	48.1996	29.0126	32.3159	69.8765
FBgn0016119	ATPsynCF6	938.56	-0.59735	0.311463	-1.91789	0.0551253	0.397792	691.532	806.271	366.531	493.564	649.881	748.902	503.326
FBgn0034742	CG4294	107.047	-0.688212	0.35866	-1.91884	0.0550044	0.397792	136.729	163.867	86.8658	121.849	52.2226	150.298	86.979
FBgn0036685	CG6664	158.341	-0.484248	0.252445	-1.91823	0.0550814	0.397792	186.687	280.236	145.129	189.328	174.075	233.462	169.511
FBgn0038795	CG4335	42.4965	1.2692	0.661393	1.91899	0.054986	0.397792	28.9234	47.4976	156.782	42.4157	81.2352	38.2105	93.4777
FBgn0260793	2mit	10.1317	3.63398	1.89454	1.91814	0.0550936	0.397792	5.2588	0	74.1537	8.48313	0	2.6294	27.5456
FBgn0033484	CG2269	52.512	1.64996	0.861107	1.91609	0.055354	0.39875	34.1822	30.8734	223.52	51.2844	23.21	32.5278	99.3383
FBgn0038165	Task6	19.8297	2.7985	1.46036	1.91631	0.0553259	0.39875	5.2588	8.31208	117.587	12.3391	11.605	6.78544	47.1769
FBgn0058191	CG40191	124.262	0.735394	0.38392	1.91549	0.0554303	0.398954	89.3996	81.9333	117.587	95.628	249.508	85.6665	154.241
FBgn0264542	hwt	30.1121	1.87348	0.978311	1.91502	0.0554901	0.399039	23.6646	18.999	153.604	35.4749	40.6176	21.3318	76.5655
FBgn0029997	CG2258	106.814	0.582198	0.304413	1.91253	0.0558087	0.400292	73.6232	74.8087	129.239	103.726	92.8402	74.216	108.602
FBgn0038966	pinta	40.0323	1.38884	0.726128	1.91266	0.0557916	0.400292	42.0704	15.4367	64.6197	32.7757	133.458	28.7536	76.9511
FBgn0052104	CG32104	14.5063	-1.39679	0.730299	-1.91263	0.0557951	0.400292	34.1822	33.2483	3.17802	21.2078	11.605	33.7153	11.997
FBgn0014469	Cyp4e2	38.7458	-1.0455	0.547022	-1.91126	0.0559718	0.400612	55.2174	53.4348	29.6615	24.6782	23.21	54.3261	25.8499
FBgn0015765	p38a	28.7196	1.17305	0.613824	1.91105	0.0559979	0.400612	21.0352	8.31208	25.4241	29.691	40.6176	14.6736	31.9109
FBgn0043806	CG32032	51.5408	0.918414	0.480485	1.91143	0.0559493	0.400612	52.588	34.4357	100.637	43.1869	110.248	43.5119	84.6906
FBgn0010497	dmGlut	52.8609	0.972547	0.509613	1.9084	0.056339	0.400981	31.5528	48.685	90.0438	52.8268	110.248	40.1189	84.3728
FBgn0022699	D19B	18.0506	1.333	0.698452	1.90851	0.0563258	0.400981	5.2588	13.0618	33.8988	23.5214	11.605	9.16032	23.0084
FBgn0028685	Rpt4	224.214	-0.53585	0.280756	-1.9086	0.0563141	0.400981	249.793	277.861	140.892	185.858	243.705	263.827	190.152
FBgn0031266	Sf3b1	130.326	-0.554727	0.290479	-1.9097	0.0561723	0.400981	202.464	143.68	116.527	139.586	63.8276	173.072	106.647
FBgn0032170	CG4658	80.1543	0.623252	0.326388	1.90954	0.0561922	0.400981	52.588	73.6212	116.527	98.7128	69.6301	63.1046	94.9567
FBgn0038516	P5cr-2	38.0337	1.18455	0.620673	1.90849	0.0563285	0.400981	21.0352	42.7478	101.697	52.8268	69.6301	31.8915	74.7178
FBgn0038246	CG14853	5.08799	5.18352	2.71679	1.90795	0.0563973	0.401053	0	0	33.8988	0.385597	0	0	11.4281
FBgn0000042	Act5C	4677.18	0.727404	0.382014	1.90413	0.0568933	0.401489	4309.59	3559.94	10824.3	4818.8	3876.08	3934.77	6506.4
FBgn0011770	Gip	62.4814	0.935765	0.491376	1.90438	0.0568611	0.401489	52.588	27.3111	81.5691	57.8395	87.0377	39.9496	75.4821
FBgn0028743	Dhit	59.6036	1.82575	0.958422	1.90495	0.0567868	0.401489	23.6646	22.5613	200.215	21.979	17.4075	23.113	79.8672
FBgn0030816	CG16700	7.41718	3.83135	2.01158	1.90464	0.0568265	0.401489	0	1.18744	31.7802	1.15679	0	0.59372	10.979
FBgn0033434	CG1902	110.374	0.580829	0.304753	1.9059	0.0566626	0.401489	102.547	64.1217	125.002	133.802	81.2352	83.3342	113.346
FBgn0036043	CG8177	68.0596	-1.06449	0.559032	-1.90416	0.0568889	0.401489	97.2878	135.368	52.9669	50.1276	69.6301	116.328	57.5749
[truncated: 13,299 more rows]

## Sheet: 24h-Yorkie-IR-sig
ensembl_gene_id	external_gene_name	baseMean	log2FoldChange	lfcSE	stat	pvalue	padj	wild type 24h_1	wild type 24h_2	Yorkie-IR 24h_1	Yorkie-IR 24h_2	Yorkie-IR 24h_3	Mean24h wild type	Mean24h Yorkie-IR
[truncated: 91 more rows]

[truncated: 13 more sheets: 24h-Yorkie-IR-all, 24h_common_lof, 24h Yorkie-CA-sig, 24h Yorkie-CA-all, 24h Hippo-IR-sig, 24h Hippo-IR-all, 24h_common_gof, 32h Yorkie-CA-sig, 32h Yorkie-CA-all, 32h Hippo-IR-sig, 32h Hippo-IR-all, 32hcommon_gof, 32h common gof up-regulated]
