# Supplementary material for: The Hippo pathway controls myofibril assembly and muscle fiber growth by regulating sarcomeric gene expression
Source: eLife. 2021 Jan 6;10:e63726. doi: 10.7554/eLife.63726 (PMC7815313; doi:10.7554/eLife.63726)
Supplement: Supplementary file 3. [file elife-63726-supp3.xlsx]

## Sheet: 24h_Dlg5-IR_phenotypes
Term	Overlap	P-value	Adjusted P-value	Old P-value	Old Adjusted P-value	Z-score	Combined Score	Genes	enrichR_category
flight_defective	8/200	6.0987e-08	2.19553e-06	0.000172087	0.00619512	-1.74029	28.9107	CG3630;rols;salr;Tm1;CG18304;Prm;sls;CG4945	phenotype_autoRIF_predicted_zscore
jumping_defective	6/200	1.6069e-05	0.000289241	0.00559706	0.100747	-1.49351	16.4863	CG3630;Tm1;CG18304;Prm;sls;CG4945	phenotype_autoRIF_predicted_zscore
flight_defective	2/40	0.00522623	0.0365836	0.00660764	0.0462535	-1.73616	9.1219	Tm1;LamC	phenotype_autoRIF
jumping_defective	1/9	0.024044	0.0777051	0.0314045	0.0949419	-2.25521	8.40715	LamC	phenotype_autoRIF
homeotic	2/106	0.0333022	0.0777051	0.0406894	0.0949419	-1.31967	4.48968	salr;pho	phenotype_autoRIF
temperature_response_defective	3/200	0.0168163	0.201795	0.236504	0.824771	-1.64518	6.72121	NaPi-III;Sep4;tinc	phenotype_autoRIF_predicted_zscore
grandchildless	2/169	0.0763664	0.332619	0.421217	0.824771	-1.4915	3.83646	CG3918;CG11180	phenotype_autoRIF_predicted_zscore
circadian_rhythm_defective	2/200	0.101634	0.332619	0.509594	0.824771	-1.65499	3.78393	Sep4;tinc	phenotype_autoRIF_predicted_zscore
female_fertile	2/200	0.101634	0.332619	0.509594	0.824771	-1.59248	3.64102	CG3918;tgo	phenotype_autoRIF_predicted_zscore
homeotic	2/200	0.101634	0.332619	0.509594	0.824771	-1.4336	3.27775	CG1677;tgo	phenotype_autoRIF_predicted_zscore
modifier_of_variegation	2/200	0.101634	0.332619	0.509594	0.824771	-1.30071	2.97391	CG3918;tgo	phenotype_autoRIF_predicted_zscore
paralytic	2/200	0.101634	0.332619	0.509594	0.824771	-1.25766	2.87548	Sep4;SK	phenotype_autoRIF_predicted_zscore
visible	2/200	0.101634	0.332619	0.509594	0.824771	-0.924836	2.11453	CG10465;rogdi	phenotype_autoRIF_predicted_zscore
semi-sterile	2/200	0.101634	0.332619	0.509594	0.824771	-0.922717	2.10968	CG3918;CG11180	phenotype_autoRIF_predicted_zscore
aging_defective	1/107	0.251782	0.369443	0.299445	0.439156	-1.35859	1.87375	LamC	phenotype_autoRIF
wild-type	1/113	0.263888	0.369443	0.313683	0.439156	-1.18604	1.58008	LamC	phenotype_autoRIF
immune_response_defective	1/78	0.190463	0.419254	0.488055	0.824771	-1.27871	2.12048	CG5174	phenotype_autoRIF_predicted_zscore
hyperactive	1/90	0.216412	0.419254	0.538326	0.824771	-1.08984	1.66808	tgo	phenotype_autoRIF_predicted_zscore
chemical_sensitive	1/108	0.253813	0.419254	0.60496	0.824771	-1.02498	1.40541	tgo	phenotype_autoRIF_predicted_zscore
hypoactive	1/135	0.306652	0.419254	0.68792	0.824771	-0.896782	1.06004	tinc	phenotype_autoRIF_predicted_zscore
cell_growth_defective	1/156	0.345193	0.419254	0.740617	0.824771	-0.788478	0.838666	tgo	phenotype_autoRIF_predicted_zscore
increased_mortality	1/162	0.355813	0.419254	0.754033	0.824771	-0.646714	0.668281	klar	phenotype_autoRIF_predicted_zscore
chemical_resistant	1/177	0.381629	0.419254	0.784726	0.824771	-0.634902	0.611605	Flo1	phenotype_autoRIF_predicted_zscore
cell_size_defective	1/175	0.378247	0.419254	0.780857	0.824771	-0.571043	0.555173	tgo	phenotype_autoRIF_predicted_zscore
cell_polarity_defective	1/177	0.381629	0.419254	0.784726	0.824771	-0.553666	0.533349	tgo	phenotype_autoRIF_predicted_zscore
increased_fecundity	1/181	0.38834	0.419254	0.792269	0.824771	-0.352019	0.332965	klar	phenotype_autoRIF_predicted_zscore
cell_adhesion_defective	1/200	0.419254	0.419254	0.824771	0.824771	-0.319656	0.27787	tgo	phenotype_autoRIF_predicted_zscore
cell_migration_defective	1/200	0.419254	0.419254	0.824771	0.824771	-0.250028	0.217344	tgo	phenotype_autoRIF_predicted_zscore
auxotroph	1/200	0.419254	0.419254	0.824771	0.824771	-0.210045	0.182588	CG4822	phenotype_autoRIF_predicted_zscore
axis_specification_defective	1/200	0.419254	0.419254	0.824771	0.824771	-0.20577	0.178872	tgo	phenotype_autoRIF_predicted_zscore
exocytosis_defective	1/200	0.419254	0.419254	0.824771	0.824771	-0.180487	0.156894	2004-09-01	phenotype_autoRIF_predicted_zscore
cell_shape_defective	1/200	0.419254	0.419254	0.824771	0.824771	-0.179405	0.155953	tgo	phenotype_autoRIF_predicted_zscore
electrophoretic_variant	1/200	0.419254	0.419254	0.824771	0.824771	0.0422769	-0.0367504	CG11151	phenotype_autoRIF_predicted_zscore
decreased_fecundity	1/200	0.419254	0.419254	0.824771	0.824771	0.05555	-0.0482884	tgo	phenotype_autoRIF_predicted_zscore
sensory_perception_defective	1/200	0.419254	0.419254	0.824771	0.824771	0.105701	-0.0918832	SK	phenotype_autoRIF_predicted_zscore
neuroanatomy_defective	1/200	0.419254	0.419254	0.824771	0.824771	0.111078	-0.0965577	tinc	phenotype_autoRIF_predicted_zscore
neurogenic_phenotype	1/200	0.419254	0.419254	0.824771	0.824771	0.217705	-0.189246	tgo	phenotype_autoRIF_predicted_zscore
planar_polarity_defective	1/200	0.419254	0.419254	0.824771	0.824771	0.42518	-0.3696	tgo	phenotype_autoRIF_predicted_zscore
phototaxis_defective	1/200	0.419254	0.419254	0.824771	0.824771	0.44796	-0.389401	rols	phenotype_autoRIF_predicted_zscore
sterile	1/200	0.419254	0.419254	0.824771	0.824771	0.494231	-0.429624	tgo	phenotype_autoRIF_predicted_zscore
sex-determination_defective	1/200	0.419254	0.419254	0.824771	0.824771	0.608568	-0.529015	pho	phenotype_autoRIF_predicted_zscore
cell_polarity_defective	1/167	0.364534	0.42529	0.431707	0.503658	-1.11181	1.12197	Tm1	phenotype_autoRIF
behavior_defective	1/244	0.485077	0.485077	0.571361	0.571361	-0.984313	0.7121	poe	phenotype_autoRIF

## Sheet: 24h_Dlg5-IR_GO_biolProcess
Term	Overlap	P-value	Adjusted P-value	Old P-value	Old Adjusted P-value	Z-score	Combined Score	Genes	enrichR_category
sarcomere organization (GO:0045214)	10/200	1.30287e-10	1.44358e-07	3.07732e-08	3.40967e-05	-1.71303	38.9908	klar;CG3630;rols;Msp300;poe;Tm1;CdGAPr;Prm;sls;CG4945	GO_BP_coexpression_predicted
actomyosin structure organization (GO:0031032)	8/200	6.0987e-08	3.37868e-05	4.61702e-06	0.00255783	-1.45325	24.1422	klar;CG3630;rols;poe;Tm1;Prm;sls;CG4945	GO_BP_coexpression_predicted
striated_muscle_contraction_(GO:0006941)	8/200	6.0987e-08	3.90926e-05	9.63871e-06	0.00617841	-1.88945	31.3887	CG3630;poe;Tm1;CG18304;Prm;sls;CG4945;LamC	GO_BP_autoRIF_predicted_zscore
regulation_of_actin_filament_length_(GO:0030832)	8/200	6.0987e-08	3.90926e-05	9.63871e-06	0.00617841	-1.47575	24.5161	klar;CG3630;rols;poe;Tm1;CG18304;Prm;CG4945	GO_BP_autoRIF_predicted_zscore
skeletal muscle organ development (GO:0060538)	7/200	1.07104e-06	0.000296677	4.5653e-05	0.0126459	-1.8434	25.341	klar;rols;Msp300;poe;CdGAPr;tinc;CG4945	GO_BP_coexpression_predicted
myofibril assembly (GO:0030239)	7/200	1.07104e-06	0.000296677	4.5653e-05	0.0126459	-1.56805	21.5558	CG3630;Msp300;poe;Tm1;Prm;sls;CG4945	GO_BP_coexpression_predicted
visceral muscle development (GO:0007522)	3/16	1.01632e-05	0.00138293	7.31858e-05	0.0118585	-2.47888	28.499	klar;Msp300;sls	GO_BP_2018
actomyosin structure organization (GO:0031032)	4/52	1.16703e-05	0.00138293	0.000100072	0.0118585	-2.20909	25.0918	rols;Tm1;Prm;sls	GO_BP_2018
cytoskeletal anchoring at plasma membrane (GO:0007016)	6/200	1.6069e-05	0.0029674	0.000384968	0.0710907	-1.83388	20.2435	klar;rols;pigs;poe;Tm1;LamC	GO_BP_coexpression_predicted
striated muscle cell development (GO:0055002)	6/200	1.6069e-05	0.0029674	0.000384968	0.0710907	-1.80585	19.934	CG3630;pigs;Tm1;Prm;sls;CG4945	GO_BP_coexpression_predicted
sarcomere_organization_(GO:0045214)	6/200	1.6069e-05	0.0034334	0.000623513	0.133224	-1.79878	19.856	CG3630;Tm1;CG18304;Prm;sls;CG4945	GO_BP_autoRIF_predicted_zscore
skeletal_myofibril_assembly_(GO:0014866)	6/200	1.6069e-05	0.0034334	0.000623513	0.133224	-1.77881	19.6356	CG3630;Tm1;CG18304;Prm;sls;CG4945	GO_BP_autoRIF_predicted_zscore
muscle_thin_filament_assembly_(GO:0071689)	6/200	1.6069e-05	0.0034334	0.000623513	0.133224	-1.39669	15.4176	CG3630;Tm1;CG18304;Prm;sls;CG4945	GO_BP_autoRIF_predicted_zscore
myofibril_assembly_(GO:0030239)	6/200	1.6069e-05	0.0034334	0.000623513	0.133224	-1.37507	15.1788	CG3630;Tm1;CG18304;Prm;sls;CG4945	GO_BP_autoRIF_predicted_zscore
nucleus organization (GO:0006997)	3/29	6.46876e-05	0.00441176	0.000360137	0.0260849	-2.29251	22.1134	klar;Msp300;LamC	GO_BP_2018
mesoderm development (GO:0007498)	4/83	7.44602e-05	0.00441176	0.000550314	0.0260849	-1.21323	11.532	Msp300;Prm;sls;CG4945	GO_BP_2018
microtubule anchoring (GO:0034453)	2/6	0.000106588	0.00505228	0.00052339	0.0260849	-4.1889	38.314	klar;Msp300	GO_BP_2018
instar larval or pupal morphogenesis (GO:0048707)	5/200	0.00020209	0.00861216	0.0027213	0.115969	-1.96037	16.6765	klar;poe;Drak;CdGAPr;CG2926	GO_BP_coexpression_predicted
post-embryonic animal organ morphogenesis (GO:0048563)	5/200	0.00020209	0.00861216	0.0027213	0.115969	-1.94411	16.5381	klar;poe;Drak;CdGAPr;CG2926	GO_BP_coexpression_predicted
regulation of mRNA metabolic process (GO:1903311)	5/200	0.00020209	0.00861216	0.0027213	0.115969	-1.88231	16.0124	CG7546;CdGAPr;CG2926;CG1677;tgo	GO_BP_coexpression_predicted
regulation of response to wounding (GO:1903034)	5/200	0.00020209	0.00861216	0.0027213	0.115969	-1.85426	15.7738	klar;NaPi-III;rols;Sep4;Drak	GO_BP_coexpression_predicted
skeletal myofibril assembly (GO:0014866)	5/200	0.00020209	0.00861216	0.0027213	0.115969	-1.83916	15.6454	CG3630;Tm1;Prm;sls;CG4945	GO_BP_coexpression_predicted
blood circulation (GO:0008015)	5/200	0.00020209	0.00861216	0.0027213	0.115969	-1.83149	15.5801	CG3630;Tm1;Prm;sls;CG4945	GO_BP_coexpression_predicted
muscle thin filament assembly (GO:0071689)	5/200	0.00020209	0.00861216	0.0027213	0.115969	-1.7932	15.2543	CG3630;Tm1;Prm;sls;CG4945	GO_BP_coexpression_predicted
morphogenesis of larval imaginal disc epithelium (GO:0016335)	5/200	0.00020209	0.00861216	0.0027213	0.115969	-1.71757	14.611	klar;rols;Drak;CdGAPr;tinc	GO_BP_coexpression_predicted
negative regulation of growth (GO:0045926)	5/200	0.00020209	0.00861216	0.0027213	0.115969	-1.71005	14.547	klar;CG7546;Drak;CdGAPr;CG2926	GO_BP_coexpression_predicted
cardiac muscle tissue development (GO:0048738)	5/200	0.00020209	0.00861216	0.0027213	0.115969	-1.70466	14.5012	klar;Drak;Tm1;CG4945;LamC	GO_BP_coexpression_predicted
positive regulation of stem cell proliferation (GO:2000648)	5/200	0.00020209	0.00861216	0.0027213	0.115969	-1.70304	14.4874	klar;rols;Drak;CdGAPr;tinc	GO_BP_coexpression_predicted
muscle contraction (GO:0006936)	5/172	9.98204e-05	0.00861216	0.00142657	0.115969	-1.56309	14.3994	CG3630;Tm1;Prm;sls;CG4945	GO_BP_coexpression_predicted
epidermis development (GO:0008544)	5/200	0.00020209	0.00861216	0.0027213	0.115969	-1.65068	14.042	klar;rols;Drak;CdGAPr;CG2926	GO_BP_coexpression_predicted
establishment of body hair or bristle planar orientation (GO:0048104)	5/200	0.00020209	0.00861216	0.0027213	0.115969	-1.64986	14.035	klar;rols;salr;CdGAPr;tinc	GO_BP_coexpression_predicted
muscle organ morphogenesis (GO:0048644)	5/200	0.00020209	0.00861216	0.0027213	0.115969	-1.64617	14.0036	klar;rols;salr;Tm1;LamC	GO_BP_coexpression_predicted
skeletal muscle tissue development (GO:0007519)	5/200	0.00020209	0.00861216	0.0027213	0.115969	-1.59746	13.5893	klar;rols;poe;Drak;CdGAPr	GO_BP_coexpression_predicted
striated muscle contraction (GO:0006941)	5/200	0.00020209	0.00861216	0.0027213	0.115969	-1.55523	13.23	CG3630;Tm1;Prm;sls;CG4945	GO_BP_coexpression_predicted
peripheral nervous system neuron development (GO:0048935)	5/200	0.00020209	0.00861216	0.0027213	0.115969	-1.54086	13.1078	klar;rols;pigs;poe;CdGAPr	GO_BP_coexpression_predicted
myosin filament assembly (GO:0031034)	5/200	0.00020209	0.00861216	0.0027213	0.115969	-1.49832	12.7459	rols;Tm1;Prm;CG4945;LamC	GO_BP_coexpression_predicted
heart contraction (GO:0060047)	5/181	0.000126848	0.00861216	0.00177728	0.115969	-1.39863	12.5492	CG3630;Tm1;Prm;sls;CG4945	GO_BP_coexpression_predicted
myofibril assembly (GO:0030239)	3/44	0.000227843	0.00899981	0.00112508	0.0413079	-1.71036	14.3446	rols;Prm;sls	GO_BP_2018
larval visceral muscle development (GO:0007523)	2/10	0.000317555	0.0107515	0.00122007	0.0413079	-3.13369	25.2414	klar;Msp300	GO_BP_2018
skeletal muscle organ development (GO:0060538)	2/11	0.000387452	0.0114783	0.0014379	0.0425977	-2.77157	21.7732	Msp300;sls	GO_BP_2018
skeletal muscle tissue development (GO:0007519)	2/13	0.000547577	0.0144195	0.00192491	0.0506893	-2.52061	18.9298	Msp300;sls	GO_BP_2018
striated muscle tissue development (GO:0014706)	2/16	0.000838061	0.0180262	0.00278162	0.0659243	-2.75001	19.4822	Msp300;sls	GO_BP_2018
nuclear migration (GO:0007097)	2/18	0.00106484	0.0180262	0.00343519	0.067845	-2.52661	17.2945	klar;Msp300	GO_BP_2018
nucleus localization (GO:0051647)	2/18	0.00106484	0.0180262	0.00343519	0.067845	-2.37486	16.2557	klar;Msp300	GO_BP_2018
compound eye photoreceptor cell differentiation (GO:0001751)	3/73	0.00101248	0.0180262	0.0044688	0.076794	-1.50405	10.371	klar;Past1;Usp5	GO_BP_2018
negative regulation of transcription, DNA-templated (GO:0045892)	5/279	0.000922216	0.0180262	0.0077144	0.11427	-1.03741	7.25017	salr;pho;CG12384;Maf1;tgo	GO_BP_2018
positive regulation of sequence-specific DNA binding transcription factor activity (GO:0051091)	2/21	0.00145398	0.0229728	0.00453636	0.076794	-2.26424	14.7933	CG3630;CkIIalpha	GO_BP_2018
regulation of generation of precursor metabolites and energy (GO:0043467)	4/150	0.000718358	0.0294793	0.0060021	0.246308	-1.56239	11.3094	Fis1;klar;CG12384;CG7142	GO_BP_coexpression_predicted
regulation of photoreceptor cell differentiation (GO:0046532)	2/25	0.0020628	0.0305552	0.00622421	0.0983425	-2.37657	14.696	tinc;tgo	GO_BP_2018
heart_contraction_(GO:0060047)	5/200	0.00020209	0.0370114	0.00394678	0.650941	-1.52522	12.9747	pigs;poe;Tm1;CG18304;CG4945	GO_BP_autoRIF_predicted_zscore
neural crest cell development (GO:0014032)	4/200	0.00207664	0.0410877	0.0157595	0.311813	-1.97045	12.1715	klar;rols;salr;tinc	GO_BP_coexpression_predicted
catecholamine biosynthetic process (GO:0042423)	4/200	0.00207664	0.0410877	0.0157595	0.311813	-1.94084	11.9886	NaPi-III;Sep4;SK;tinc	GO_BP_coexpression_predicted
epithelial cell differentiation (GO:0030855)	4/200	0.00207664	0.0410877	0.0157595	0.311813	-1.93308	11.9406	klar;rols;salr;CdGAPr	GO_BP_coexpression_predicted
regulation of myotube differentiation (GO:0010830)	4/200	0.00207664	0.0410877	0.0157595	0.311813	-1.92036	11.8621	klar;rols;Tm1;LamC	GO_BP_coexpression_predicted
regulation of syncytium formation by plasma membrane fusion (GO:0060142)	4/200	0.00207664	0.0410877	0.0157595	0.311813	-1.90666	11.7774	klar;rols;Tm1;LamC	GO_BP_coexpression_predicted
endothelial cell development (GO:0001885)	4/200	0.00207664	0.0410877	0.0157595	0.311813	-1.89798	11.7238	rols;Arf102F;CG7142;LamC	GO_BP_coexpression_predicted
imaginal disc-derived genitalia development (GO:0007484)	4/200	0.00207664	0.0410877	0.0157595	0.311813	-1.87874	11.605	rols;salr;CdGAPr;tinc	GO_BP_coexpression_predicted
male genitalia development (GO:0030539)	4/200	0.00207664	0.0410877	0.0157595	0.311813	-1.85482	11.4573	klar;rols;salr;CdGAPr	GO_BP_coexpression_predicted
hydrogen ion transmembrane transport (GO:1902600)	4/200	0.00207664	0.0410877	0.0157595	0.311813	-1.83324	11.3239	CG3630;Tm1;Prm;CG4945	GO_BP_coexpression_predicted
positive regulation of stress fiber assembly (GO:0051496)	4/200	0.00207664	0.0410877	0.0157595	0.311813	-1.82955	11.3011	klar;CG2926;CG1677;tgo	GO_BP_coexpression_predicted
protein import into nucleus, translocation (GO:0000060)	3/84	0.001519	0.0410877	0.00813363	0.311813	-1.68815	10.9556	salr;Prm;CG4945	GO_BP_coexpression_predicted
energy coupled proton transport, down electrochemical gradient (GO:0015985)	4/200	0.00207664	0.0410877	0.0157595	0.311813	-1.76624	10.9101	CG3630;Tm1;Prm;CG4945	GO_BP_coexpression_predicted
proton transport (GO:0015992)	4/200	0.00207664	0.0410877	0.0157595	0.311813	-1.71363	10.5851	CG3630;Tm1;Prm;CG4945	GO_BP_coexpression_predicted
defasciculation of motor neuron axon (GO:0007415)	4/200	0.00207664	0.0410877	0.0157595	0.311813	-1.68988	10.4384	NaPi-III;Sep4;SK;tinc	GO_BP_coexpression_predicted
ATP biosynthetic process (GO:0006754)	4/200	0.00207664	0.0410877	0.0157595	0.311813	-1.6849	10.4076	CG3630;Tm1;Prm;CG4945	GO_BP_coexpression_predicted
trachea morphogenesis (GO:0060439)	4/200	0.00207664	0.0410877	0.0157595	0.311813	-1.66277	10.2709	rols;salr;Tm1;tinc	GO_BP_coexpression_predicted
positive regulation of cell migration (GO:0030335)	4/200	0.00207664	0.0410877	0.0157595	0.311813	-1.65477	10.2215	klar;rols;salr;tinc	GO_BP_coexpression_predicted
positive regulation of Rho protein signal transduction (GO:0035025)	4/200	0.00207664	0.0410877	0.0157595	0.311813	-1.6493	10.1877	klar;rols;Drak;CdGAPr	GO_BP_coexpression_predicted
peptidyl-tyrosine modification (GO:0018212)	4/200	0.00207664	0.0410877	0.0157595	0.311813	-1.64208	10.1431	CdGAPr;CG2926;CG1677;tgo	GO_BP_coexpression_predicted
neural crest cell migration (GO:0001755)	4/200	0.00207664	0.0410877	0.0157595	0.311813	-1.61463	9.97357	klar;rols;salr;tinc	GO_BP_coexpression_predicted
ATP synthesis coupled proton transport (GO:0015986)	4/190	0.00172258	0.0410877	0.0133115	0.311813	-1.56692	9.97175	CG3630;Tm1;Prm;CG4945	GO_BP_coexpression_predicted
cell-cell adhesion mediated by cadherin (GO:0044331)	4/200	0.00207664	0.0410877	0.0157595	0.311813	-1.6095	9.9419	klar;rols;salr;tinc	GO_BP_coexpression_predicted
regulation of stress fiber assembly (GO:0051492)	4/200	0.00207664	0.0410877	0.0157595	0.311813	-1.57235	9.7124	klar;rols;CG7546;Drak	GO_BP_coexpression_predicted
cellular biogenic amine biosynthetic process (GO:0042401)	4/186	0.00159355	0.0410877	0.0124055	0.311813	-1.50091	9.66852	NaPi-III;Sep4;SK;tinc	GO_BP_coexpression_predicted
eclosion rhythm (GO:0008062)	4/200	0.00207664	0.0410877	0.0157595	0.311813	-1.55727	9.61928	NaPi-III;Sep4;SK;tinc	GO_BP_coexpression_predicted
non-sensory hair organization (GO:0035316)	4/200	0.00207664	0.0410877	0.0157595	0.311813	-1.5379	9.49964	klar;rols;Drak;CdGAPr	GO_BP_coexpression_predicted
intracellular distribution of mitochondria (GO:0048312)	4/200	0.00207664	0.0410877	0.0157595	0.311813	-1.5212	9.39647	NaPi-III;poe;Drak;CdGAPr	GO_BP_coexpression_predicted
striated muscle tissue development (GO:0014706)	4/200	0.00207664	0.0410877	0.0157595	0.311813	-1.51354	9.34912	klar;rols;Drak;CdGAPr	GO_BP_coexpression_predicted
mitochondrion distribution (GO:0048311)	4/200	0.00207664	0.0410877	0.0157595	0.311813	-1.42496	8.80201	klar;poe;Drak;CdGAPr	GO_BP_coexpression_predicted
sarcomere organization (GO:0045214)	2/34	0.00379795	0.0529479	0.0108972	0.15192	-1.82492	10.1708	rols;sls	GO_BP_2018
regulation of organ morphogenesis (GO:2000027)	2/40	0.00522623	0.0688121	0.0146484	0.19287	-2.21082	11.6158	tinc;tgo	GO_BP_2018
gliogenesis (GO:0042063)	2/43	0.00601918	0.0750813	0.0167044	0.194005	-2.29163	11.7167	poe;tgo	GO_BP_2018
myotube differentiation (GO:0014902)	2/47	0.00715623	0.0770922	0.0196256	0.194005	-1.96616	9.71238	rols;sls	GO_BP_2018
post-embryonic animal organ development (GO:0048569)	2/46	0.00686352	0.0770922	0.0188764	0.194005	-1.84505	9.19118	klar;Msp300	GO_BP_2018
myoblast fusion (GO:0007520)	2/47	0.00715623	0.0770922	0.0196256	0.194005	-1.71968	8.49481	rols;sls	GO_BP_2018
positive regulation of hh target transcription factor activity (GO:0007228)	1/6	0.016093	0.0985723	0.0305653	0.194005	-5.25375	21.6947	CkIIalpha	GO_BP_2018
R1/R6 cell differentiation (GO:0048052)	1/7	0.0187504	0.0985723	0.034857	0.194005	-5.2937	21.0506	Past1	GO_BP_2018
signal transduction downstream of smoothened (GO:0007227)	1/6	0.016093	0.0985723	0.0305653	0.194005	-4.91568	20.2987	CkIIalpha	GO_BP_2018
regulation of transcription from RNA polymerase III promoter (GO:0006359)	1/6	0.016093	0.0985723	0.0305653	0.194005	-4.91113	20.2799	Maf1	GO_BP_2018
male genitalia development (GO:0030539)	1/6	0.016093	0.0985723	0.0305653	0.194005	-4.85514	20.0486	salr	GO_BP_2018
perineurial glial growth (GO:0042066)	1/6	0.016093	0.0985723	0.0305653	0.194005	-4.6173	19.0666	poe	GO_BP_2018
negative regulation of protein modification by small protein conjugation or removal (GO:1903321)	1/6	0.016093	0.0985723	0.0305653	0.194005	-4.5273	18.6949	CkIIalpha	GO_BP_2018
inorganic ion homeostasis (GO:0098771)	1/7	0.0187504	0.0985723	0.034857	0.194005	-4.51658	17.9604	MtnB	GO_BP_2018
positive regulation of response to external stimulus (GO:0032103)	1/8	0.0214007	0.0985723	0.0391303	0.194005	-4.34224	16.693	Imp	GO_BP_2018
regulation of axon regeneration (GO:0048679)	1/7	0.0187504	0.0985723	0.034857	0.194005	-4.1387	16.4577	Imp	GO_BP_2018
regulation of membrane potential in photoreceptor cell (GO:0016057)	1/9	0.024044	0.0985723	0.0433851	0.194005	-4.18828	15.6134	SK	GO_BP_2018
septin ring organization (GO:0031106)	1/8	0.0214007	0.0985723	0.0391303	0.194005	-4.00519	15.3973	Sep4	GO_BP_2018
regulation of transport (GO:0051049)	1/7	0.0187504	0.0985723	0.034857	0.194005	-3.7226	14.8031	klar	GO_BP_2018
DNA topological change (GO:0006265)	1/7	0.0187504	0.0985723	0.034857	0.194005	-3.6294	14.4325	pho	GO_BP_2018
muscle organ morphogenesis (GO:0048644)	1/8	0.0214007	0.0985723	0.0391303	0.194005	-3.73169	14.3459	LamC	GO_BP_2018
DNA conformation change (GO:0071103)	1/7	0.0187504	0.0985723	0.034857	0.194005	-3.50204	13.926	pho	GO_BP_2018
protein import into nucleus, translocation (GO:0000060)	1/7	0.0187504	0.0985723	0.034857	0.194005	-3.33319	13.2546	CG3630	GO_BP_2018
mitochondrial fission (GO:0000266)	1/9	0.024044	0.0985723	0.0433851	0.194005	-3.44635	12.8475	Fis1	GO_BP_2018
septin ring assembly (GO:0000921)	1/6	0.016093	0.0985723	0.0305653	0.194005	-3.08323	12.7318	Sep4	GO_BP_2018
glial cell growth (GO:0042065)	1/9	0.024044	0.0985723	0.0433851	0.194005	-3.39593	12.6596	poe	GO_BP_2018
positive regulation of mitochondrial fission (GO:0090141)	1/8	0.0214007	0.0985723	0.0391303	0.194005	-3.25203	12.5019	Fis1	GO_BP_2018
peptidyl-threonine phosphorylation (GO:0018107)	1/8	0.0214007	0.0985723	0.0391303	0.194005	-3.21815	12.3717	CG4945	GO_BP_2018
regulation of mitochondrial fission (GO:0090140)	1/9	0.024044	0.0985723	0.0433851	0.194005	-3.20989	11.9661	Fis1	GO_BP_2018
development of primary male sexual characteristics (GO:0046546)	1/9	0.024044	0.0985723	0.0433851	0.194005	-3.15751	11.7708	salr	GO_BP_2018
peptidyl-threonine modification (GO:0018210)	1/8	0.0214007	0.0985723	0.0391303	0.194005	-3.06103	11.7676	CG4945	GO_BP_2018
male gonad development (GO:0008584)	1/9	0.024044	0.0985723	0.0433851	0.194005	-3.12339	11.6436	salr	GO_BP_2018
regulation of lamellipodium organization (GO:1902743)	1/8	0.0214007	0.0985723	0.0391303	0.194005	-2.94525	11.3225	Tm1	GO_BP_2018
cation homeostasis (GO:0055080)	1/8	0.0214007	0.0985723	0.0391303	0.194005	-2.93177	11.2707	MtnB	GO_BP_2018
apoptotic mitochondrial changes (GO:0008637)	1/7	0.0187504	0.0985723	0.034857	0.194005	-2.44233	9.71203	Fis1	GO_BP_2018
apoptotic process (GO:0006915)	2/55	0.0096964	0.0985723	0.0260556	0.194005	-1.62672	7.5415	Fis1;CG12384	GO_BP_2018
genitalia development (GO:0048806)	1/7	0.0187504	0.0985723	0.034857	0.194005	-1.57069	6.2459	salr	GO_BP_2018
actin filament organization (GO:0007015)	2/78	0.01885	0.0985723	0.0484424	0.201411	-1.27076	5.0465	Msp300;Tm1	GO_BP_2018
negative regulation of programmed cell death (GO:0043069)	2/89	0.0241232	0.0985723	0.0609234	0.212336	-1.28049	4.76928	CG7546;Usp5	GO_BP_2018
compound eye development (GO:0048749)	3/198	0.0163757	0.0985723	0.0583221	0.212336	-1.10562	4.54628	klar;Arf102F;CkIIalpha	GO_BP_2018
oogenesis (GO:0048477)	3/216	0.0205799	0.0985723	0.0716103	0.221216	-1.04607	4.06233	Tm1;Past1;tgo	GO_BP_2018
female gamete generation (GO:0007292)	3/208	0.0186448	0.0985723	0.065545	0.215752	-0.959884	3.82244	Tm1;Past1;tgo	GO_BP_2018
phosphate ion transmembrane transport (GO:0035435)	1/10	0.0266802	0.100085	0.0476217	0.201411	-3.96422	14.3657	NaPi-III	GO_BP_2018
chromatin-mediated maintenance of transcription (GO:0048096)	1/10	0.0266802	0.100085	0.0476217	0.201411	-3.71935	13.4783	pho	GO_BP_2018
regulation of eye photoreceptor cell development (GO:0042478)	1/10	0.0266802	0.100085	0.0476217	0.201411	-2.74077	9.9321	tinc	GO_BP_2018
protein phosphorylation (GO:0006468)	3/235	0.0256046	0.100085	0.0869959	0.224109	-1.03314	3.78645	Drak;CG4945;CkIIalpha	GO_BP_2018
imaginal disc-derived wing morphogenesis (GO:0007476)	3/240	0.0270272	0.100085	0.0912649	0.229686	-1.03287	3.72959	salr;Drak;Past1	GO_BP_2018
regulation of transcription, DNA-templated (GO:0006355)	5/623	0.0260495	0.100085	0.140406	0.24833	-0.93941	3.42674	CG3630;salr;pho;CG12384;tgo	GO_BP_2018
phosphate ion transport (GO:0006817)	1/11	0.0293095	0.100672	0.05184	0.201411	-3.85059	13.592	NaPi-III	GO_BP_2018
positive regulation of mitochondrion organization (GO:0010822)	1/11	0.0293095	0.100672	0.05184	0.201411	-2.69966	9.52937	Fis1	GO_BP_2018
positive regulation of JAK-STAT cascade (GO:0046427)	1/11	0.0293095	0.100672	0.05184	0.201411	-2.51675	8.88374	Imp	GO_BP_2018
positive regulation of STAT cascade (GO:1904894)	1/11	0.0293095	0.100672	0.05184	0.201411	-2.5024	8.83308	Imp	GO_BP_2018
regulation of nucleic acid-templated transcription (GO:1903506)	3/246	0.0287894	0.100672	0.0965038	0.234822	-1.24854	4.4295	salr;pho;tgo	GO_BP_2018
regulation of intracellular transport (GO:0032386)	1/12	0.0319318	0.106333	0.0560402	0.212336	-3.22793	11.1175	klar	GO_BP_2018
retinal ganglion cell axon guidance (GO:0031290)	1/13	0.0345472	0.106333	0.0602223	0.212336	-2.98337	10.0403	CdGAPr	GO_BP_2018
protein depolymerization (GO:0051261)	1/13	0.0345472	0.106333	0.0602223	0.212336	-2.91755	9.81882	Usp5	GO_BP_2018
mitochondrion localization (GO:0051646)	1/13	0.0345472	0.106333	0.0602223	0.212336	-2.72714	9.17798	Msp300	GO_BP_2018
anterior Malpighian tubule development (GO:0061327)	1/13	0.0345472	0.106333	0.0602223	0.212336	-2.58913	8.71352	rols	GO_BP_2018
endocytosis (GO:0006897)	2/104	0.0321608	0.106333	0.0794922	0.221216	-1.07338	3.6892	Pxn;Past1	GO_BP_2018
phosphorylation (GO:0016310)	3/258	0.0324936	0.106333	0.107348	0.234822	-1.02376	3.50812	Drak;CG4945;CkIIalpha	GO_BP_2018
negative regulation of apoptotic process (GO:0043066)	2/106	0.0333022	0.106333	0.0820893	0.221216	-1.02553	3.489	CG7546;Usp5	GO_BP_2018
maintenance of gastrointestinal epithelium (GO:0030277)	3/133	0.00556844	0.106376	0.0268316	0.463914	-1.86884	9.70048	CG7142;CG1677;tgo	GO_BP_coexpression_predicted
intestinal epithelial structure maintenance (GO:0060729)	3/133	0.00556844	0.106376	0.0268316	0.463914	-1.66988	8.66773	CG7142;CG1677;tgo	GO_BP_coexpression_predicted
regulation of cellular macromolecule biosynthetic process (GO:2000112)	3/266	0.0350957	0.106637	0.114838	0.234822	-1.22059	4.08859	salr;pho;tgo	GO_BP_2018
regulation of gene expression, epigenetic (GO:0040029)	3/141	0.00654378	0.108328	0.0310747	0.463914	-1.67601	8.42904	CG2926;CG1677;tgo	GO_BP_coexpression_predicted
positive regulation of cellular catabolic process (GO:0031331)	2/70	0.0153682	0.108328	0.0463292	0.463914	-1.97851	8.26117	CG1677;tgo	GO_BP_coexpression_predicted
cell-cell adhesion via plasma-membrane adhesion molecules (GO:0098742)	3/200	0.0168163	0.108328	0.0724342	0.463914	-2.01896	8.24828	rols;Sep4;tinc	GO_BP_coexpression_predicted
membrane assembly (GO:0071709)	3/200	0.0168163	0.108328	0.0724342	0.463914	-1.95965	8.00597	Sep4;SK;tinc	GO_BP_coexpression_predicted
cardiac cell fate commitment (GO:0060911)	3/200	0.0168163	0.108328	0.0724342	0.463914	-1.94316	7.93859	klar;Drak;CdGAPr	GO_BP_coexpression_predicted
cellular response to fibroblast growth factor stimulus (GO:0044344)	3/200	0.0168163	0.108328	0.0724342	0.463914	-1.94069	7.92851	Sep4;SK;tinc	GO_BP_coexpression_predicted
postsynapse assembly (GO:0099068)	3/200	0.0168163	0.108328	0.0724342	0.463914	-1.89521	7.74271	Sep4;SK;tinc	GO_BP_coexpression_predicted
renal tubule development (GO:0061326)	3/180	0.0127076	0.108328	0.0564919	0.463914	-1.72318	7.52263	klar;Drak;tgo	GO_BP_coexpression_predicted
cellular response to peptide hormone stimulus (GO:0071375)	3/200	0.0168163	0.108328	0.0724342	0.463914	-1.8314	7.482	poe;CdGAPr;CG2926	GO_BP_coexpression_predicted
negative regulation of cell-cell adhesion (GO:0022408)	3/200	0.0168163	0.108328	0.0724342	0.463914	-1.82839	7.46973	rols;tinc;CG1677	GO_BP_coexpression_predicted
induction of programmed cell death by ecdysone (GO:0035078)	3/172	0.0112469	0.108328	0.0506522	0.463914	-1.65001	7.40467	CG2926;CG1677;tgo	GO_BP_coexpression_predicted
peptidyl-tyrosine phosphorylation (GO:0018108)	3/200	0.0168163	0.108328	0.0724342	0.463914	-1.78751	7.30269	CG2926;CG1677;tgo	GO_BP_coexpression_predicted
axis elongation (GO:0003401)	3/200	0.0168163	0.108328	0.0724342	0.463914	-1.77954	7.27014	klar;rols;tinc	GO_BP_coexpression_predicted
regulation of morphogenesis of an epithelium (GO:1905330)	3/200	0.0168163	0.108328	0.0724342	0.463914	-1.77029	7.23235	klar;CdGAPr;tinc	GO_BP_coexpression_predicted
clypeo-labral disc development (GO:0035213)	3/200	0.0168163	0.108328	0.0724342	0.463914	-1.76478	7.20986	rols;salr;tinc	GO_BP_coexpression_predicted
negative regulation of axon guidance (GO:1902668)	3/200	0.0168163	0.108328	0.0724342	0.463914	-1.75218	7.15837	klar;rols;tinc	GO_BP_coexpression_predicted
presynapse assembly (GO:0099054)	3/200	0.0168163	0.108328	0.0724342	0.463914	-1.74567	7.13177	Sep4;SK;tinc	GO_BP_coexpression_predicted
eye photoreceptor cell fate commitment (GO:0042706)	3/200	0.0168163	0.108328	0.0724342	0.463914	-1.74021	7.10945	klar;rols;salr	GO_BP_coexpression_predicted
peripheral nervous system neuron differentiation (GO:0048934)	3/200	0.0168163	0.108328	0.0724342	0.463914	-1.73937	7.10602	klar;pigs;poe	GO_BP_coexpression_predicted
negative regulation of cell development (GO:0010721)	3/200	0.0168163	0.108328	0.0724342	0.463914	-1.72424	7.04423	klar;rols;tinc	GO_BP_coexpression_predicted
histone lysine demethylation (GO:0070076)	3/200	0.0168163	0.108328	0.0724342	0.463914	-1.72242	7.03678	CG2926;CG1677;tgo	GO_BP_coexpression_predicted
regulation of cell fate commitment (GO:0010453)	3/200	0.0168163	0.108328	0.0724342	0.463914	-1.70376	6.96054	rols;salr;tinc	GO_BP_coexpression_predicted
imaginal disc-derived wing vein morphogenesis (GO:0008586)	3/161	0.00940609	0.108328	0.0431427	0.463914	-1.49141	6.95952	klar;CG2926;tgo	GO_BP_coexpression_predicted
mesodermal cell migration (GO:0008078)	3/200	0.0168163	0.108328	0.0724342	0.463914	-1.69789	6.93658	klar;CG2926;tgo	GO_BP_coexpression_predicted
cuticle chitin metabolic process (GO:0006034)	3/200	0.0168163	0.108328	0.0724342	0.463914	-1.69696	6.93276	rols;Tm1;LamC	GO_BP_coexpression_predicted
imaginal disc-derived wing margin morphogenesis (GO:0008587)	3/200	0.0168163	0.108328	0.0724342	0.463914	-1.68873	6.89917	klar;rols;tgo	GO_BP_coexpression_predicted
positive regulation of feeding behavior (GO:2000253)	3/200	0.0168163	0.108328	0.0724342	0.463914	-1.67624	6.84812	NaPi-III;Sep4;Drak	GO_BP_coexpression_predicted
wing disc pattern formation (GO:0035222)	3/193	0.0153034	0.108328	0.0666411	0.463914	-1.63779	6.84546	klar;CG2926;tgo	GO_BP_coexpression_predicted
regulation of STAT cascade (GO:1904892)	3/200	0.0168163	0.108328	0.0724342	0.463914	-1.6657	6.80506	CG7546;CG2926;CG1677	GO_BP_coexpression_predicted
regulation of development, heterochronic (GO:0040034)	3/149	0.00761497	0.108328	0.0356532	0.463914	-1.37671	6.71509	CG2926;CG1677;tgo	GO_BP_coexpression_predicted
apposition of dorsal and ventral imaginal disc-derived wing surfaces (GO:0007475)	3/200	0.0168163	0.108328	0.0724342	0.463914	-1.64264	6.71087	klar;rols;LamC	GO_BP_coexpression_predicted
phototaxis (GO:0042331)	3/200	0.0168163	0.108328	0.0724342	0.463914	-1.63872	6.69483	NaPi-III;Sep4;SK	GO_BP_coexpression_predicted
negative regulation of G1/S transition of mitotic cell cycle (GO:2000134)	3/168	0.0105552	0.108328	0.0478511	0.463914	-1.46323	6.65936	CG2926;CG1677;tgo	GO_BP_coexpression_predicted
axonal defasciculation (GO:0007414)	3/200	0.0168163	0.108328	0.0724342	0.463914	-1.62761	6.64944	Sep4;SK;tinc	GO_BP_coexpression_predicted
retinal ganglion cell axon guidance (GO:0031290)	3/200	0.0168163	0.108328	0.0724342	0.463914	-1.62407	6.63498	klar;CdGAPr;tinc	GO_BP_coexpression_predicted
eye photoreceptor cell development (GO:0042462)	3/200	0.0168163	0.108328	0.0724342	0.463914	-1.61165	6.58425	SK;Drak;tinc	GO_BP_coexpression_predicted
negative regulation of cell cycle G1/S phase transition (GO:1902807)	3/194	0.0155145	0.108328	0.0674548	0.463914	-1.57978	6.58135	CG2926;CG1677;tgo	GO_BP_coexpression_predicted
cellular response to amino acid stimulus (GO:0071230)	3/200	0.0168163	0.108328	0.0724342	0.463914	-1.60943	6.57519	Fis1;CG12384;Arf102F	GO_BP_coexpression_predicted
autophagic cell death (GO:0048102)	3/200	0.0168163	0.108328	0.0724342	0.463914	-1.60742	6.56697	Sep4;pigs;tinc	GO_BP_coexpression_predicted
heterophilic cell-cell adhesion via plasma membrane cell adhesion molecules (GO:0007157)	3/200	0.0168163	0.108328	0.0724342	0.463914	-1.60076	6.53978	Sep4;SK;tinc	GO_BP_coexpression_predicted
ecdysone-mediated induction of salivary gland cell autophagic cell death (GO:0035072)	3/172	0.0112469	0.108328	0.0506522	0.463914	-1.4559	6.5336	CG2926;CG1677;tgo	GO_BP_coexpression_predicted
R1/R6 cell differentiation (GO:0048052)	3/200	0.0168163	0.108328	0.0724342	0.463914	-1.59874	6.53149	klar;rols;CdGAPr	GO_BP_coexpression_predicted
positive regulation of neuroblast proliferation (GO:0002052)	3/200	0.0168163	0.108328	0.0724342	0.463914	-1.5811	6.45945	klar;CdGAPr;tinc	GO_BP_coexpression_predicted
fibroblast growth factor receptor signaling pathway (GO:0008543)	3/200	0.0168163	0.108328	0.0724342	0.463914	-1.57637	6.4401	Sep4;SK;tinc	GO_BP_coexpression_predicted
detection of light stimulus involved in visual perception (GO:0050908)	3/200	0.0168163	0.108328	0.0724342	0.463914	-1.57522	6.43544	NaPi-III;Sep4;SK	GO_BP_coexpression_predicted
microtubule anchoring (GO:0034453)	3/200	0.0168163	0.108328	0.0724342	0.463914	-1.57346	6.42821	rols;poe;CdGAPr	GO_BP_coexpression_predicted
muscle organ development (GO:0007517)	3/200	0.0168163	0.108328	0.0724342	0.463914	-1.57313	6.42688	rols;CdGAPr;tinc	GO_BP_coexpression_predicted
negative regulation of hormone secretion (GO:0046888)	3/200	0.0168163	0.108328	0.0724342	0.463914	-1.56107	6.3776	pigs;Drak;Imp	GO_BP_coexpression_predicted
homophilic cell adhesion via plasma membrane adhesion molecules (GO:0007156)	3/200	0.0168163	0.108328	0.0724342	0.463914	-1.5541	6.34915	rols;Sep4;tinc	GO_BP_coexpression_predicted
calcium-dependent cell-cell adhesion via plasma membrane cell adhesion molecules (GO:0016339)	3/200	0.0168163	0.108328	0.0724342	0.463914	-1.54881	6.32754	klar;rols;salr	GO_BP_coexpression_predicted
response to light stimulus (GO:0009416)	3/200	0.0168163	0.108328	0.0724342	0.463914	-1.54713	6.32067	NaPi-III;Sep4;SK	GO_BP_coexpression_predicted
presynaptic membrane assembly (GO:0097105)	3/200	0.0168163	0.108328	0.0724342	0.463914	-1.54651	6.31811	Sep4;SK;tinc	GO_BP_coexpression_predicted
regulation of cell fate specification (GO:0042659)	3/200	0.0168163	0.108328	0.0724342	0.463914	-1.54575	6.31501	klar;rols;tinc	GO_BP_coexpression_predicted
presynaptic membrane organization (GO:0097090)	3/200	0.0168163	0.108328	0.0724342	0.463914	-1.54508	6.31229	Sep4;SK;tinc	GO_BP_coexpression_predicted
sensory neuron axon guidance (GO:0097374)	3/200	0.0168163	0.108328	0.0724342	0.463914	-1.54374	6.3068	klar;rols;CdGAPr	GO_BP_coexpression_predicted
negative regulation of axon extension (GO:0030517)	3/200	0.0168163	0.108328	0.0724342	0.463914	-1.54324	6.30478	klar;rols;tinc	GO_BP_coexpression_predicted
synaptic target recognition (GO:0008039)	3/200	0.0168163	0.108328	0.0724342	0.463914	-1.53948	6.28939	rols;Sep4;tinc	GO_BP_coexpression_predicted
regulation of ion transport (GO:0043269)	3/200	0.0168163	0.108328	0.0724342	0.463914	-1.53927	6.28856	NaPi-III;Sep4;SK	GO_BP_coexpression_predicted
mitochondrial electron transport, ubiquinol to cytochrome c (GO:0006122)	3/200	0.0168163	0.108328	0.0724342	0.463914	-1.53879	6.28658	CG3630;Prm;CG4945	GO_BP_coexpression_predicted
positive regulation of neural precursor cell proliferation (GO:2000179)	3/200	0.0168163	0.108328	0.0724342	0.463914	-1.53731	6.28056	klar;CdGAPr;tinc	GO_BP_coexpression_predicted
adult walking behavior (GO:0007628)	3/200	0.0168163	0.108328	0.0724342	0.463914	-1.53654	6.27737	Sep4;SK;tinc	GO_BP_coexpression_predicted
dendrite self-avoidance (GO:0070593)	3/200	0.0168163	0.108328	0.0724342	0.463914	-1.53388	6.26653	klar;rols;tinc	GO_BP_coexpression_predicted
negative regulation of cell growth (GO:0030308)	3/200	0.0168163	0.108328	0.0724342	0.463914	-1.52512	6.23075	CG7546;Drak;CG2926	GO_BP_coexpression_predicted
positive regulation of clathrin-dependent endocytosis (GO:2000370)	3/200	0.0168163	0.108328	0.0724342	0.463914	-1.52257	6.22032	NaPi-III;Sep4;SK	GO_BP_coexpression_predicted
proximal/distal pattern formation, imaginal disc (GO:0007449)	3/200	0.0168163	0.108328	0.0724342	0.463914	-1.52013	6.21036	rols;salr;tinc	GO_BP_coexpression_predicted
genitalia development (GO:0048806)	3/200	0.0168163	0.108328	0.0724342	0.463914	-1.51627	6.19457	klar;rols;CdGAPr	GO_BP_coexpression_predicted
histone H4-K16 acetylation (GO:0043984)	3/178	0.0123327	0.108328	0.0550026	0.463914	-1.4077	6.18754	CG2926;CG1677;tgo	GO_BP_coexpression_predicted
notum cell fate specification (GO:0035310)	3/200	0.0168163	0.108328	0.0724342	0.463914	-1.5102	6.16978	rols;salr;tinc	GO_BP_coexpression_predicted
regulation of neuromuscular junction development (GO:1904396)	3/200	0.0168163	0.108328	0.0724342	0.463914	-1.50977	6.16804	Sep4;SK;tinc	GO_BP_coexpression_predicted
receptor clustering (GO:0043113)	3/200	0.0168163	0.108328	0.0724342	0.463914	-1.50636	6.15409	Sep4;SK;tinc	GO_BP_coexpression_predicted
regulation of clathrin-dependent endocytosis (GO:2000369)	3/200	0.0168163	0.108328	0.0724342	0.463914	-1.50583	6.15191	NaPi-III;Sep4;SK	GO_BP_coexpression_predicted
compound eye cone cell differentiation (GO:0042675)	3/200	0.0168163	0.108328	0.0724342	0.463914	-1.49919	6.12482	klar;rols;tinc	GO_BP_coexpression_predicted
terminal region determination (GO:0007362)	3/174	0.0116024	0.108328	0.0520826	0.463914	-1.37342	6.12072	CG2926;CG1677;tgo	GO_BP_coexpression_predicted
synaptic vesicle transport along microtubule (GO:0099517)	3/200	0.0168163	0.108328	0.0724342	0.463914	-1.4963	6.113	NaPi-III;Sep4;SK	GO_BP_coexpression_predicted
regulation of anatomical structure morphogenesis (GO:0022603)	3/200	0.0168163	0.108328	0.0724342	0.463914	-1.48988	6.08677	Fis1;Sep4;Imp	GO_BP_coexpression_predicted
muscle tissue development (GO:0060537)	3/185	0.0136732	0.108328	0.0603001	0.463914	-1.41492	6.07328	pigs;Tm1;CG4822	GO_BP_coexpression_predicted
cell elongation involved in imaginal disc-derived wing morphogenesis (GO:0090254)	3/200	0.0168163	0.108328	0.0724342	0.463914	-1.4851	6.06724	klar;rols;salr	GO_BP_coexpression_predicted
response to insulin (GO:0032868)	3/200	0.0168163	0.108328	0.0724342	0.463914	-1.48467	6.06546	poe;CdGAPr;CG2926	GO_BP_coexpression_predicted
R8 cell fate commitment (GO:0007460)	3/200	0.0168163	0.108328	0.0724342	0.463914	-1.47962	6.04485	klar;rols;tgo	GO_BP_coexpression_predicted
positive regulation of behavior (GO:0048520)	3/200	0.0168163	0.108328	0.0724342	0.463914	-1.47776	6.03727	NaPi-III;Sep4;SK	GO_BP_coexpression_predicted
regulation of neuron death (GO:1901214)	3/200	0.0168163	0.108328	0.0724342	0.463914	-1.47727	6.03525	pigs;poe;CG2926	GO_BP_coexpression_predicted
dorsal/ventral lineage restriction, imaginal disc (GO:0007451)	3/200	0.0168163	0.108328	0.0724342	0.463914	-1.47302	6.01788	klar;rols;salr	GO_BP_coexpression_predicted
cuticle chitin biosynthetic process (GO:0006035)	3/200	0.0168163	0.108328	0.0724342	0.463914	-1.46966	6.00414	rols;Tm1;LamC	GO_BP_coexpression_predicted
cell-matrix adhesion (GO:0007160)	3/200	0.0168163	0.108328	0.0724342	0.463914	-1.46594	5.98896	rols;CG7142;LamC	GO_BP_coexpression_predicted
regulation of peptidyl-lysine acetylation (GO:2000756)	3/200	0.0168163	0.108328	0.0724342	0.463914	-1.45279	5.93524	CG2926;CG1677;tgo	GO_BP_coexpression_predicted
regulation of tube length, open tracheal system (GO:0035159)	3/200	0.0168163	0.108328	0.0724342	0.463914	-1.4518	5.93121	klar;rols;salr	GO_BP_coexpression_predicted
regulation of exocytosis (GO:0017157)	3/200	0.0168163	0.108328	0.0724342	0.463914	-1.45171	5.93085	Sep4;SK;tinc	GO_BP_coexpression_predicted
dorsal trunk growth, open tracheal system (GO:0035001)	3/200	0.0168163	0.108328	0.0724342	0.463914	-1.45151	5.93002	klar;rols;LamC	GO_BP_coexpression_predicted
positive regulation of neuron projection development (GO:0010976)	3/200	0.0168163	0.108328	0.0724342	0.463914	-1.45072	5.92677	klar;rols;tinc	GO_BP_coexpression_predicted
neuron cell-cell adhesion (GO:0007158)	3/200	0.0168163	0.108328	0.0724342	0.463914	-1.44621	5.90835	Sep4;SK;tinc	GO_BP_coexpression_predicted
epidermal cell differentiation (GO:0009913)	3/200	0.0168163	0.108328	0.0724342	0.463914	-1.44619	5.90828	klar;Drak;CdGAPr	GO_BP_coexpression_predicted
epidermis morphogenesis (GO:0048730)	3/200	0.0168163	0.108328	0.0724342	0.463914	-1.44532	5.90471	klar;CdGAPr;CG2926	GO_BP_coexpression_predicted
positive regulation of actin filament bundle assembly (GO:0032233)	3/200	0.0168163	0.108328	0.0724342	0.463914	-1.44434	5.90072	klar;CG7546;CG2926	GO_BP_coexpression_predicted
protein localization involved in establishment of planar polarity (GO:0090251)	3/200	0.0168163	0.108328	0.0724342	0.463914	-1.44316	5.89588	klar;rols;salr	GO_BP_coexpression_predicted
embryonic epithelial tube formation (GO:0001838)	3/200	0.0168163	0.108328	0.0724342	0.463914	-1.43987	5.88245	klar;rols;salr	GO_BP_coexpression_predicted
equator specification (GO:0045317)	3/200	0.0168163	0.108328	0.0724342	0.463914	-1.43351	5.85646	klar;rols;salr	GO_BP_coexpression_predicted
G-protein coupled glutamate receptor signaling pathway (GO:0007216)	3/200	0.0168163	0.108328	0.0724342	0.463914	-1.43052	5.84427	NaPi-III;Sep4;SK	GO_BP_coexpression_predicted
imaginal disc-derived appendage development (GO:0048737)	3/200	0.0168163	0.108328	0.0724342	0.463914	-1.42741	5.83153	klar;rols;salr	GO_BP_coexpression_predicted
regulation of ARF protein signal transduction (GO:0032012)	3/200	0.0168163	0.108328	0.0724342	0.463914	-1.42527	5.8228	pigs;poe;CG4822	GO_BP_coexpression_predicted
regulation of phosphorylation (GO:0042325)	3/200	0.0168163	0.108328	0.0724342	0.463914	-1.4184	5.79476	klar;CG2926;CG1677	GO_BP_coexpression_predicted
salivary gland cell autophagic cell death (GO:0035071)	3/200	0.0168163	0.108328	0.0724342	0.463914	-1.4139	5.77635	klar;CG2926;tgo	GO_BP_coexpression_predicted
circadian sleep/wake cycle (GO:0042745)	3/200	0.0168163	0.108328	0.0724342	0.463914	-1.4084	5.75391	NaPi-III;Sep4;SK	GO_BP_coexpression_predicted
regulation of oviposition (GO:0046662)	3/200	0.0168163	0.108328	0.0724342	0.463914	-1.4058	5.74328	CG12384;Arf102F;Past1	GO_BP_coexpression_predicted
positive regulation of circadian rhythm (GO:0042753)	3/200	0.0168163	0.108328	0.0724342	0.463914	-1.40523	5.74094	NaPi-III;Sep4;SK	GO_BP_coexpression_predicted
negative regulation of axon extension involved in axon guidance (GO:0048843)	3/200	0.0168163	0.108328	0.0724342	0.463914	-1.3995	5.71752	klar;rols;tinc	GO_BP_coexpression_predicted
positive regulation of actin filament polymerization (GO:0030838)	3/200	0.0168163	0.108328	0.0724342	0.463914	-1.39459	5.69749	klar;CG7546;CG2926	GO_BP_coexpression_predicted
semaphorin-plexin signaling pathway (GO:0071526)	3/200	0.0168163	0.108328	0.0724342	0.463914	-1.38991	5.67835	klar;rols;tinc	GO_BP_coexpression_predicted
regulation of actin filament bundle assembly (GO:0032231)	3/200	0.0168163	0.108328	0.0724342	0.463914	-1.38199	5.64599	klar;CG7546;CG2926	GO_BP_coexpression_predicted
regulation of Rho protein signal transduction (GO:0035023)	3/200	0.0168163	0.108328	0.0724342	0.463914	-1.36936	5.59441	klar;rols;CdGAPr	GO_BP_coexpression_predicted
regulation of histone H3-K27 methylation (GO:0061085)	3/200	0.0168163	0.108328	0.0724342	0.463914	-1.36527	5.5777	CG2926;CG1677;tgo	GO_BP_coexpression_predicted
larval heart development (GO:0007508)	3/200	0.0168163	0.108328	0.0724342	0.463914	-1.35929	5.55327	rols;CG7142;LamC	GO_BP_coexpression_predicted
syncytial blastoderm mitotic cell cycle (GO:0035186)	3/200	0.0168163	0.108328	0.0724342	0.463914	-1.34678	5.50215	CG2926;CG1677;tgo	GO_BP_coexpression_predicted
regulation of intracellular protein transport (GO:0033157)	3/200	0.0168163	0.108328	0.0724342	0.463914	-1.31805	5.38479	CG2926;CG1677;tgo	GO_BP_coexpression_predicted
response to reactive oxygen species (GO:0000302)	3/200	0.0168163	0.108328	0.0724342	0.463914	-1.31801	5.38459	Fis1;CG12384;Arf102F	GO_BP_coexpression_predicted
cholesterol transport (GO:0030301)	1/14	0.0371556	0.108714	0.0643864	0.214924	-3.12543	10.2909	CG4822	GO_BP_2018
vesicle-mediated transport to the plasma membrane (GO:0098876)	1/14	0.0371556	0.108714	0.0643864	0.214924	-2.641	8.69587	Arf102F	GO_BP_2018
organelle transport along microtubule (GO:0072384)	1/14	0.0371556	0.108714	0.0643864	0.214924	-1.77771	5.85335	klar	GO_BP_2018
cellular response to amino acid starvation (GO:0034198)	1/15	0.0397571	0.113523	0.0685326	0.219489	-2.90441	9.36664	CG12384	GO_BP_2018
muscle contraction (GO:0006936)	1/15	0.0397571	0.113523	0.0685326	0.219489	-2.6079	8.41038	Tm1	GO_BP_2018
regulation of R7 cell differentiation (GO:0045676)	1/16	0.0423517	0.119492	0.0726609	0.221216	-2.53646	8.01965	tgo	GO_BP_2018
metal ion homeostasis (GO:0055065)	1/19	0.0500943	0.119923	0.0849395	0.221216	-2.9568	8.85221	MtnB	GO_BP_2018
organelle fission (GO:0048285)	1/17	0.0449394	0.119923	0.0767714	0.221216	-2.6827	8.32292	Fis1	GO_BP_2018
regulation of protein complex assembly (GO:0043254)	1/18	0.0475203	0.119923	0.0808643	0.221216	-2.67893	8.16163	Usp5	GO_BP_2018
regulation of plasma membrane bounded cell projection assembly (GO:0120032)	1/18	0.0475203	0.119923	0.0808643	0.221216	-2.642	8.0491	Tm1	GO_BP_2018
peroxisome organization (GO:0007031)	1/19	0.0500943	0.119923	0.0849395	0.221216	-2.68275	8.03174	Fis1	GO_BP_2018
positive regulation of Rho protein signal transduction (GO:0035025)	1/18	0.0475203	0.119923	0.0808643	0.221216	-2.56524	7.81525	CG3630	GO_BP_2018
positive regulation of response to wounding (GO:1903036)	1/17	0.0449394	0.119923	0.0767714	0.221216	-2.50054	7.75778	Imp	GO_BP_2018
regulation of lamellipodium assembly (GO:0010591)	1/18	0.0475203	0.119923	0.0808643	0.221216	-2.39001	7.28139	Tm1	GO_BP_2018
positive regulation of smoothened signaling pathway (GO:0045880)	1/17	0.0449394	0.119923	0.0767714	0.221216	-2.33572	7.24644	CkIIalpha	GO_BP_2018
regulation of protein ubiquitination (GO:0031396)	1/17	0.0449394	0.119923	0.0767714	0.221216	-2.32638	7.21745	CkIIalpha	GO_BP_2018
positive regulation of gene expression, epigenetic (GO:0045815)	1/19	0.0500943	0.119923	0.0849395	0.221216	-2.384	7.13735	pho	GO_BP_2018
regulation of protein polymerization (GO:0032271)	1/18	0.0475203	0.119923	0.0808643	0.221216	-2.21977	6.76276	LamC	GO_BP_2018
potassium ion transport (GO:0006813)	1/19	0.0500943	0.119923	0.0849395	0.221216	-2.20219	6.59301	SK	GO_BP_2018
negative regulation of nucleic acid-templated transcription (GO:1903507)	2/132	0.0495058	0.119923	0.118035	0.235078	-1.22348	3.67736	pho;CG12384	GO_BP_2018
compound eye morphogenesis (GO:0001745)	2/131	0.0488384	0.119923	0.116586	0.234822	-1.09557	3.30779	klar;Usp5	GO_BP_2018
establishment_of_mitotic_spindle_orientation_(GO:0000132)	4/200	0.00207664	0.121011	0.0206847	0.650941	-2.19979	13.5881	CG3918;CG11180;CG1677;tgo	GO_BP_autoRIF_predicted_zscore
semaphorin-plexin_signaling_pathway_(GO:0071526)	4/200	0.00207664	0.121011	0.0206847	0.650941	-2.13406	13.1821	klar;rols;CdGAPr;tinc	GO_BP_autoRIF_predicted_zscore
cellular_response_to_decreased_oxygen_levels_(GO:0036294)	4/200	0.00207664	0.121011	0.0206847	0.650941	-2.07549	12.8203	klar;rols;CCT8;Usp5	GO_BP_autoRIF_predicted_zscore
cardiocyte_differentiation_(GO:0035051)	4/200	0.00207664	0.121011	0.0206847	0.650941	-1.94045	11.9861	klar;rols;salr;CdGAPr	GO_BP_autoRIF_predicted_zscore
regulation_of_actin_nucleation_(GO:0051125)	4/200	0.00207664	0.121011	0.0206847	0.650941	-1.90865	11.7897	CG3918;CG2926;CG1677;tgo	GO_BP_autoRIF_predicted_zscore
regulation_of_histone_methylation_(GO:0031060)	4/200	0.00207664	0.121011	0.0206847	0.650941	-1.81329	11.2007	CG3918;CG2926;CG1677;tgo	GO_BP_autoRIF_predicted_zscore
histone_acetylation_(GO:0016573)	4/200	0.00207664	0.121011	0.0206847	0.650941	-1.76351	10.8932	CG3918;CG2926;CG1677;tgo	GO_BP_autoRIF_predicted_zscore
histone_lysine_methylation_(GO:0034968)	4/200	0.00207664	0.121011	0.0206847	0.650941	-1.75605	10.8472	CG3918;CG2926;CG1677;tgo	GO_BP_autoRIF_predicted_zscore
regulation_of_myotube_differentiation_(GO:0010830)	4/200	0.00207664	0.121011	0.0206847	0.650941	-1.72689	10.667	klar;rols;salr;tinc	GO_BP_autoRIF_predicted_zscore
regulation_of_macromolecule_metabolic_process_(GO:0060255)	4/200	0.00207664	0.121011	0.0206847	0.650941	-1.63362	10.0909	CG3630;Tm1;CG18304;CG4945	GO_BP_autoRIF_predicted_zscore
muscle_contraction_(GO:0006936)	4/200	0.00207664	0.121011	0.0206847	0.650941	-1.60895	9.93851	rols;CG18304;Prm;CG4945	GO_BP_autoRIF_predicted_zscore
sterol_homeostasis_(GO:0055092)	4/200	0.00207664	0.121011	0.0206847	0.650941	-1.57162	9.70792	klar;Drak;CG2926;l(3)05822	GO_BP_autoRIF_predicted_zscore
positive_regulation_of_antimicrobial_peptide_production_(GO:0002225)	4/200	0.00207664	0.121011	0.0206847	0.650941	-1.5597	9.63426	CG12384;CG11151;VhaM9.7-b;CG31313	GO_BP_autoRIF_predicted_zscore
regulation_of_cellular_macromolecule_biosynthetic_process_(GO:2000112)	4/200	0.00207664	0.121011	0.0206847	0.650941	-1.55811	9.62444	CG3630;Tm1;CG18304;CG4945	GO_BP_autoRIF_predicted_zscore
positive_regulation_of_mitotic_nuclear_division_(GO:0045840)	4/200	0.00207664	0.121011	0.0206847	0.650941	-1.46303	9.03715	CG3918;CG11180;CG1677;tgo	GO_BP_autoRIF_predicted_zscore
sterol transport (GO:0015918)	1/20	0.0526615	0.124808	0.0889972	0.226799	-2.38552	7.02265	CG4822	GO_BP_2018
response to metal ion (GO:0010038)	1/21	0.0552218	0.126842	0.0930373	0.229686	-2.17253	6.2925	MtnB	GO_BP_2018
regulation of actin polymerization or depolymerization (GO:0008064)	1/21	0.0552218	0.126842	0.0930373	0.229686	-1.94424	5.6313	LamC	GO_BP_2018
dendrite morphogenesis (GO:0048813)	2/141	0.0556604	0.126842	0.131281	0.24499	-1.05466	3.04637	pho;Tm1	GO_BP_2018
eye development (GO:0001654)	2/140	0.0549638	0.126842	0.129792	0.244133	-0.861886	2.5004	Arf102F;CkIIalpha	GO_BP_2018
sensory organ development (GO:0007423)	2/143	0.0570632	0.1288	0.134272	0.246686	-1.00517	2.87839	salr;CkIIalpha	GO_BP_2018
response to insulin (GO:0032868)	1/24	0.0628623	0.131844	0.105054	0.234822	-2.37264	6.56464	tgo	GO_BP_2018
negative regulation of stress-activated MAPK cascade (GO:0032873)	1/23	0.0603222	0.131844	0.101066	0.234822	-2.32277	6.52247	Usp5	GO_BP_2018
cellular response to peptide hormone stimulus (GO:0071375)	1/24	0.0628623	0.131844	0.105054	0.234822	-2.34593	6.49073	tgo	GO_BP_2018
negative regulation of cellular catabolic process (GO:0031330)	1/24	0.0628623	0.131844	0.105054	0.234822	-2.32043	6.42019	CG12384	GO_BP_2018
negative regulation of autophagy (GO:0010507)	1/24	0.0628623	0.131844	0.105054	0.234822	-2.10408	5.82158	CG12384	GO_BP_2018
mitochondrion disassembly (GO:0061726)	1/23	0.0603222	0.131844	0.101066	0.234822	-2.01291	5.65235	Fis1	GO_BP_2018
Golgi to plasma membrane transport (GO:0006893)	1/24	0.0628623	0.131844	0.105054	0.234822	-1.50837	4.17337	Arf102F	GO_BP_2018
regulation of cellular localization (GO:0060341)	1/23	0.0603222	0.131844	0.101066	0.234822	-1.45732	4.09222	klar	GO_BP_2018
mitotic chromosome condensation (GO:0007076)	1/25	0.0653956	0.131947	0.109025	0.234822	-2.40759	6.56622	sls	GO_BP_2018
post-Golgi vesicle-mediated transport (GO:0006892)	1/25	0.0653956	0.131947	0.109025	0.234822	-2.25264	6.14362	Arf102F	GO_BP_2018
negative regulation of JNK cascade (GO:0046329)	1/26	0.0679222	0.131947	0.112979	0.234822	-2.14111	5.75828	Usp5	GO_BP_2018
lumen formation, open tracheal system (GO:0035149)	1/26	0.0679222	0.131947	0.112979	0.234822	-2.09803	5.64242	klar	GO_BP_2018
adult chitin-containing cuticle pigmentation (GO:0048085)	1/26	0.0679222	0.131947	0.112979	0.234822	-2.02048	5.43386	klar	GO_BP_2018
regulation of pole plasm oskar mRNA localization (GO:0007317)	1/26	0.0679222	0.131947	0.112979	0.234822	-1.93474	5.20328	klar	GO_BP_2018
autophagy of mitochondrion (GO:0000422)	1/26	0.0679222	0.131947	0.112979	0.234822	-1.84726	4.968	Fis1	GO_BP_2018
regulation of Rho protein signal transduction (GO:0035023)	1/25	0.0653956	0.131947	0.109025	0.234822	-1.068	2.91276	CG3630	GO_BP_2018
regulation of apoptotic process (GO:0042981)	2/152	0.0635266	0.131947	0.14792	0.257773	-1.04704	2.88594	CG7546;Usp5	GO_BP_2018
striated muscle cell development (GO:0055002)	1/27	0.0704421	0.132498	0.116915	0.234822	-2.22569	5.90468	Prm	GO_BP_2018
eye photoreceptor cell development (GO:0042462)	1/27	0.0704421	0.132498	0.116915	0.234822	-2.13393	5.66123	klar	GO_BP_2018
organelle assembly (GO:0070925)	2/161	0.0702256	0.132498	0.161848	0.272043	-1.13561	3.01623	Sep4;Prm	GO_BP_2018
cell morphogenesis involved in neuron differentiation (GO:0048667)	2/160	0.0694701	0.132498	0.160288	0.271345	-0.867565	2.31367	pho;Tm1	GO_BP_2018
positive regulation of developmental process (GO:0051094)	1/28	0.0729553	0.134034	0.120835	0.236677	-1.97657	5.17448	Fis1	GO_BP_2018
small GTPase mediated signal transduction (GO:0007264)	1/28	0.0729553	0.134034	0.120835	0.236677	-1.84578	4.83209	CdGAPr	GO_BP_2018
cellular protein localization (GO:0034613)	2/164	0.0725085	0.134034	0.166546	0.273684	-1.05948	2.78013	Sep4;Arf102F	GO_BP_2018
insulin receptor signaling pathway (GO:0008286)	1/29	0.0754618	0.136522	0.124738	0.240349	-1.94632	5.02954	tgo	GO_BP_2018
regulation of JAK-STAT cascade (GO:0046425)	1/29	0.0754618	0.136522	0.124738	0.240349	-1.67837	4.33713	Imp	GO_BP_2018
glial cell migration (GO:0008347)	1/30	0.0779617	0.138924	0.128624	0.243872	-1.80922	4.61629	tgo	GO_BP_2018
cellular response to hypoxia (GO:0071456)	1/30	0.0779617	0.138924	0.128624	0.243872	-1.77309	4.5241	tgo	GO_BP_2018
intracellular protein transport (GO:0006886)	2/173	0.0794992	0.140607	0.180784	0.273684	-0.94219	2.38563	CG3630;Arf102F	GO_BP_2018
organic substance transport (GO:0071702)	1/31	0.0804549	0.141243	0.132494	0.24532	-1.87996	4.73762	klar	GO_BP_2018
oocyte dorsal/ventral axis specification (GO:0007310)	1/33	0.0854216	0.14257	0.140182	0.24833	-2.10015	5.16669	CkIIalpha	GO_BP_2018
pole plasm oskar mRNA localization (GO:0045451)	1/33	0.0854216	0.14257	0.140182	0.24833	-1.98264	4.87761	Tm1	GO_BP_2018
cellular response to decreased oxygen levels (GO:0036294)	1/32	0.0829415	0.14257	0.136346	0.24833	-1.6939	4.21716	tgo	GO_BP_2018
lipid transport (GO:0006869)	1/33	0.0854216	0.14257	0.140182	0.24833	-1.65763	4.07803	klar	GO_BP_2018
negative regulation of cellular macromolecule biosynthetic process (GO:2000113)	2/179	0.0842731	0.14257	0.190383	0.281152	-1.12126	2.77366	pho;CG12384	GO_BP_2018
neuron projection morphogenesis (GO:0048812)	2/180	0.0850772	0.14257	0.19199	0.281152	-0.972962	2.39757	pho;Tm1	GO_BP_2018
positive regulation of transcription, DNA-templated (GO:0045893)	3/379	0.0826129	0.14257	0.237714	0.311268	-0.823051	2.05235	CG3630;pho;tgo	GO_BP_2018
spliceosomal complex assembly (GO:0000245)	2/86	0.022631	0.144943	0.0661841	0.463914	-1.42947	5.41544	CG1677;tgo	GO_BP_coexpression_predicted
cellular protein modification process (GO:0006464)	3/391	0.0887524	0.147093	0.252068	0.319466	-0.788853	1.91053	Drak;CG4945;CkIIalpha	GO_BP_2018
extracellular matrix organization (GO:0030198)	1/35	0.0903619	0.148721	0.147805	0.257773	-2.03679	4.89631	Pxn	GO_BP_2018
eye photoreceptor cell differentiation (GO:0001754)	1/36	0.0928222	0.151716	0.151591	0.262242	-1.79387	4.26416	Usp5	GO_BP_2018
inorganic anion transmembrane transport (GO:0098661)	1/37	0.095276	0.153608	0.155362	0.266817	-2.10303	4.94418	NaPi-III	GO_BP_2018
negative regulation of transcription from RNA polymerase II promoter (GO:0000122)	2/192	0.0949063	0.153608	0.211417	0.292237	-0.933369	2.19796	salr;tgo	GO_BP_2018
synaptic vesicle endocytosis (GO:0048488)	1/38	0.0977233	0.156489	0.159115	0.271298	-1.68786	3.9253	Arf102F	GO_BP_2018
RNA splicing, via transesterification reactions with bulged adenosine as nucleophile (GO:0000377)	2/198	0.0999393	0.158964	0.221214	0.296201	-0.949765	2.18749	CG1677;Imp	GO_BP_2018
regulation of smoothened signaling pathway (GO:0008589)	1/40	0.102598	0.161032	0.166575	0.273684	-1.5137	3.4466	CkIIalpha	GO_BP_2018
regulation of actin filament polymerization (GO:0030833)	1/40	0.102598	0.161032	0.166575	0.273684	-1.51152	3.44163	LamC	GO_BP_2018
regulation of hemocyte proliferation (GO:0035206)	1/41	0.105026	0.161631	0.17028	0.273684	-1.78163	4.01498	sls	GO_BP_2018
clathrin-dependent endocytosis (GO:0072583)	1/41	0.105026	0.161631	0.17028	0.273684	-1.65048	3.71944	Arf102F	GO_BP_2018
synaptic vesicle recycling (GO:0036465)	1/41	0.105026	0.161631	0.17028	0.273684	-1.54977	3.49247	Arf102F	GO_BP_2018
neuron maturation (GO:0042551)	1/44	0.112271	0.162076	0.181301	0.273684	-1.74104	3.80737	Imp	GO_BP_2018
lateral inhibition (GO:0046331)	1/43	0.109863	0.162076	0.177643	0.273684	-1.70275	3.76057	CkIIalpha	GO_BP_2018
protein deubiquitination (GO:0016579)	1/43	0.109863	0.162076	0.177643	0.273684	-1.68993	3.73225	Usp5	GO_BP_2018
neuron remodeling (GO:0016322)	1/44	0.112271	0.162076	0.181301	0.273684	-1.68226	3.67884	Imp	GO_BP_2018
peptidyl-serine modification (GO:0018209)	1/43	0.109863	0.162076	0.177643	0.273684	-1.55915	3.44342	CG4945	GO_BP_2018
brain development (GO:0007420)	1/44	0.112271	0.162076	0.181301	0.273684	-1.48846	3.25502	tgo	GO_BP_2018
R7 cell differentiation (GO:0045466)	1/43	0.109863	0.162076	0.177643	0.273684	-1.43791	3.17565	Past1	GO_BP_2018
peptidyl-serine phosphorylation (GO:0018105)	1/42	0.107448	0.162076	0.17397	0.273684	-1.41605	3.15885	CG4945	GO_BP_2018
muscle organ development (GO:0007517)	1/43	0.109863	0.162076	0.177643	0.273684	-1.3893	3.06829	sls	GO_BP_2018
mRNA processing (GO:0006397)	2/213	0.112838	0.162076	0.245872	0.314982	-0.85811	1.87223	CG1677;Imp	GO_BP_2018
mRNA splicing, via spliceosome (GO:0000398)	2/211	0.111093	0.162076	0.242574	0.312446	-0.777496	1.70846	CG1677;Imp	GO_BP_2018
positive regulation of Ras protein signal transduction (GO:0046579)	1/45	0.114673	0.16372	0.184943	0.277415	-1.58654	3.43592	CG3630	GO_BP_2018
cellular response to insulin stimulus (GO:0032869)	1/46	0.117069	0.16614	0.188569	0.281075	-1.51048	3.23997	tgo	GO_BP_2018
phagocytosis (GO:0006909)	1/47	0.119458	0.168522	0.19218	0.281152	-1.32477	2.81486	Pxn	GO_BP_2018
imaginal disc-derived wing vein morphogenesis (GO:0008586)	1/49	0.124218	0.173175	0.199354	0.288091	-1.44696	3.01795	salr	GO_BP_2018
regulation of JNK cascade (GO:0046328)	1/49	0.124218	0.173175	0.199354	0.288091	-1.42556	2.97331	Usp5	GO_BP_2018
gonad development (GO:0008406)	1/50	0.126589	0.174427	0.202918	0.291464	-1.3031	2.69327	salr	GO_BP_2018
regulation of gene expression (GO:0010468)	3/458	0.126322	0.174427	0.334122	0.375293	-0.753876	1.55971	salr;pho;tgo	GO_BP_2018
chromosome condensation (GO:0030261)	1/53	0.133662	0.176141	0.213517	0.292237	-1.69633	3.41375	sls	GO_BP_2018
negative regulation of Notch signaling pathway (GO:0045746)	1/53	0.133662	0.176141	0.213517	0.292237	-1.61398	3.24804	pigs	GO_BP_2018
vesicle-mediated transport in synapse (GO:0099003)	1/51	0.128953	0.176141	0.206466	0.292237	-1.51593	3.10509	Arf102F	GO_BP_2018
protein glycosylation (GO:0006486)	1/52	0.131311	0.176141	0.209999	0.292237	-1.50613	3.05773	Arf102F	GO_BP_2018
protein modification by small protein removal (GO:0070646)	1/54	0.136008	0.176141	0.21702	0.292237	-1.49612	2.98482	Usp5	GO_BP_2018
cytoskeleton organization (GO:0007010)	1/53	0.133662	0.176141	0.213517	0.292237	-1.4562	2.93051	Msp300	GO_BP_2018
imaginal disc-derived wing margin morphogenesis (GO:0008587)	1/54	0.136008	0.176141	0.21702	0.292237	-1.40632	2.80567	Past1	GO_BP_2018
imaginal disc-derived wing vein specification (GO:0007474)	1/53	0.133662	0.176141	0.213517	0.292237	-1.3599	2.73672	Past1	GO_BP_2018
dorsal/ventral axis specification (GO:0009950)	1/54	0.136008	0.176141	0.21702	0.292237	-1.36525	2.72374	CkIIalpha	GO_BP_2018
protein import into nucleus (GO:0006606)	1/54	0.136008	0.176141	0.21702	0.292237	-1.30159	2.59672	CG3630	GO_BP_2018
vesicle-mediated transport (GO:0016192)	2/235	0.13248	0.176141	0.282253	0.341296	-0.835427	1.68867	Arf102F;Past1	GO_BP_2018
axon guidance (GO:0007411)	2/242	0.138888	0.178894	0.293832	0.348191	-0.783338	1.54638	CdGAPr;CkIIalpha	GO_BP_2018
monovalent inorganic cation transport (GO:0015672)	1/57	0.143006	0.181243	0.227437	0.302823	-1.06432	2.06997	SK	GO_BP_2018
nervous system development (GO:0007399)	2/246	0.14258	0.181243	0.300441	0.349042	-0.806353	1.57066	Imp;tgo	GO_BP_2018
negative regulation of gene expression (GO:0010629)	2/245	0.141655	0.181243	0.298789	0.349042	-0.756274	1.47803	pho;CG12384	GO_BP_2018
metal ion transport (GO:0030001)	1/58	0.145327	0.183204	0.230879	0.305689	-1.33651	2.57783	SK	GO_BP_2018
cellular protein complex assembly (GO:0043623)	1/60	0.149949	0.188032	0.237719	0.311268	-1.51123	2.86749	Sep4	GO_BP_2018
leg disc morphogenesis (GO:0007478)	1/61	0.152251	0.188919	0.241117	0.312266	-1.16537	2.1935	Drak	GO_BP_2018
Malpighian tubule development (GO:0072002)	1/61	0.152251	0.188919	0.241117	0.312266	-0.840678	1.58234	rols	GO_BP_2018
sensory perception of sound (GO:0007605)	1/63	0.156837	0.193596	0.247869	0.315833	-1.26078	2.33565	salr	GO_BP_2018
mitotic cytokinesis (GO:0000281)	1/65	0.161398	0.198194	0.254562	0.320911	-1.36137	2.48298	Sep4	GO_BP_2018
morphogenesis of an epithelium (GO:0002009)	1/66	0.16367	0.199947	0.257887	0.323382	-1.37289	2.4848	Drak	GO_BP_2018
regulation of protein modification by small protein conjugation or removal (GO:1903320)	2/103	0.031596	0.200048	0.0898038	0.516199	-1.48753	5.13902	Fis1;pho	GO_BP_coexpression_predicted
regulation of embryonic development (GO:0045995)	2/103	0.031596	0.200048	0.0898038	0.516199	-1.4023	4.84455	CG2926;CG1677	GO_BP_coexpression_predicted
imaginal disc-derived leg morphogenesis (GO:0007480)	1/68	0.168195	0.204422	0.264493	0.329921	-1.1314	2.01687	Drak	GO_BP_2018
cytoskeleton-dependent cytokinesis (GO:0061640)	1/69	0.170449	0.206104	0.267775	0.332266	-1.39512	2.46842	Sep4	GO_BP_2018
regulation of transcription from RNA polymerase III promoter (GO:0006359)	1/26	0.0679222	0.211673	0.121932	0.516199	-2.0384	5.48207	CkIIalpha	GO_BP_coexpression_predicted
positive regulation of gene expression, epigenetic (GO:0045815)	2/111	0.0362243	0.211673	0.101673	0.516199	-1.56804	5.2028	CG2926;CG1677	GO_BP_coexpression_predicted
negative regulation of cytoskeleton organization (GO:0051494)	2/113	0.03742	0.211673	0.104708	0.516199	-1.58274	5.20016	klar;CdGAPr	GO_BP_coexpression_predicted
organelle transport along microtubule (GO:0072384)	2/109	0.0350438	0.211673	0.0986653	0.516199	-1.49247	5.00149	NaPi-III;sls	GO_BP_coexpression_predicted
positive regulation of transferase activity (GO:0051347)	2/147	0.0599058	0.211673	0.159577	0.516199	-1.73978	4.89745	pho;tinc	GO_BP_coexpression_predicted
positive regulation of protein phosphorylation (GO:0001934)	1/27	0.0704421	0.211673	0.126159	0.516199	-1.79631	4.76554	tgo	GO_BP_coexpression_predicted
tripartite regional subdivision (GO:0007351)	2/132	0.0495058	0.211673	0.134686	0.516199	-1.57722	4.7406	CG2926;CG1677	GO_BP_coexpression_predicted
positive regulation of gene silencing by miRNA (GO:2000637)	2/115	0.0386309	0.211673	0.107767	0.516199	-1.44543	4.70299	CG2926;CG1677	GO_BP_coexpression_predicted
regulation of immune effector process (GO:0002697)	2/140	0.0549638	0.211673	0.147846	0.516199	-1.61434	4.68332	CG1677;tgo	GO_BP_coexpression_predicted
cellular response to ecdysone (GO:0071390)	2/117	0.0398566	0.211673	0.11085	0.516199	-1.40931	4.54146	CG2926;CG1677	GO_BP_coexpression_predicted
anterior/posterior axis specification, embryo (GO:0008595)	2/119	0.0410971	0.211673	0.113958	0.516199	-1.4199	4.53206	CG1677;tgo	GO_BP_coexpression_predicted
regulation of cellular response to growth factor stimulus (GO:0090287)	2/140	0.0549638	0.211673	0.147846	0.516199	-1.53337	4.44844	rols;LamC	GO_BP_coexpression_predicted
positive regulation of transcription elongation from RNA polymerase II promoter (GO:0032968)	2/118	0.040475	0.211673	0.112401	0.516199	-1.37436	4.40766	CG2926;tgo	GO_BP_coexpression_predicted
regulation of hippo signaling (GO:0035330)	2/137	0.0528927	0.211673	0.142879	0.516199	-1.46172	4.29671	CG2926;tgo	GO_BP_coexpression_predicted
positive regulation of programmed cell death (GO:0043068)	1/32	0.0829415	0.211673	0.146998	0.516199	-1.69505	4.22003	tgo	GO_BP_coexpression_predicted
negative regulation of mitotic cell cycle phase transition (GO:1901991)	2/154	0.0649954	0.211673	0.171481	0.516199	-1.51863	4.15107	CG1677;tgo	GO_BP_coexpression_predicted
negative regulation of translation (GO:0017148)	2/146	0.0591906	0.211673	0.15789	0.516199	-1.44614	4.08822	CG2926;CG1677	GO_BP_coexpression_predicted
regulation of defense response to virus (GO:0050688)	2/140	0.0549638	0.211673	0.147846	0.516199	-1.40434	4.07409	CG1677;tgo	GO_BP_coexpression_predicted
inorganic cation import across plasma membrane (GO:0098659)	2/154	0.0649954	0.211673	0.171481	0.516199	-1.48442	4.05756	Sep4;SK	GO_BP_coexpression_predicted
imaginal disc-derived wing morphogenesis (GO:0007476)	2/150	0.0620694	0.211673	0.164659	0.516199	-1.45595	4.0468	klar;tgo	GO_BP_coexpression_predicted
transmembrane transport (GO:0055085)	2/149	0.0613452	0.211673	0.162961	0.516199	-1.43109	3.99451	Sep4;SK	GO_BP_coexpression_predicted
regulation of cell death (GO:0010941)	1/38	0.0977233	0.211673	0.171367	0.516199	-1.70332	3.96128	tgo	GO_BP_coexpression_predicted
regulation of transport (GO:0051049)	2/136	0.0522088	0.211673	0.141231	0.516199	-1.3168	3.88786	Drak;CdGAPr	GO_BP_coexpression_predicted
regulation of eye photoreceptor cell development (GO:0042478)	2/139	0.0542702	0.211673	0.146186	0.516199	-1.31282	3.82528	CG2926;tgo	GO_BP_coexpression_predicted
regulation of compound eye photoreceptor development (GO:0045314)	2/141	0.0556604	0.211673	0.149511	0.516199	-1.32076	3.81499	CG2926;tgo	GO_BP_coexpression_predicted
steroid metabolic process (GO:0008202)	2/147	0.0599058	0.211673	0.159577	0.516199	-1.33659	3.76249	klar;Maf1	GO_BP_coexpression_predicted
wing disc dorsal/ventral pattern formation (GO:0048190)	2/173	0.0794992	0.211673	0.204492	0.516199	-1.47097	3.72451	klar;CG2926	GO_BP_coexpression_predicted
adrenergic receptor signaling pathway (GO:0071875)	2/200	0.101634	0.211673	0.252509	0.516199	-1.62836	3.72306	Sep4;SK	GO_BP_coexpression_predicted
basal protein localization (GO:0045175)	2/159	0.0687173	0.211673	0.180078	0.516199	-1.37781	3.68945	CG1677;tgo	GO_BP_coexpression_predicted
mucosal immune response (GO:0002385)	2/165	0.0732748	0.211673	0.190485	0.516199	-1.38743	3.62611	klar;rols	GO_BP_coexpression_predicted
morphogenesis of an epithelium (GO:0002009)	2/185	0.0891329	0.211673	0.225723	0.516199	-1.48507	3.59035	klar;tgo	GO_BP_coexpression_predicted
associative learning (GO:0008306)	2/200	0.101634	0.211673	0.252509	0.516199	-1.56129	3.5697	Sep4;SK	GO_BP_coexpression_predicted
regulation of peptide secretion (GO:0002791)	2/169	0.0763664	0.211673	0.197471	0.516199	-1.38331	3.55818	pigs;CG4822	GO_BP_coexpression_predicted
dosage compensation (GO:0007549)	2/159	0.0687173	0.211673	0.180078	0.516199	-1.32765	3.55511	CG2926;tgo	GO_BP_coexpression_predicted
morphogenesis of a polarized epithelium (GO:0001738)	2/177	0.082672	0.211673	0.211543	0.516199	-1.42593	3.55467	klar;rols	GO_BP_coexpression_predicted
amine transport (GO:0015837)	2/200	0.101634	0.211673	0.252509	0.516199	-1.55449	3.55416	Sep4;SK	GO_BP_coexpression_predicted
neurogenesis (GO:0022008)	2/166	0.0740438	0.211673	0.192228	0.516199	-1.34863	3.51061	CG1677;tgo	GO_BP_coexpression_predicted
central nervous system segmentation (GO:0035283)	2/200	0.101634	0.211673	0.252509	0.516199	-1.53107	3.5006	salr;tinc	GO_BP_coexpression_predicted
cell fate specification involved in pattern specification (GO:0060573)	2/200	0.101634	0.211673	0.252509	0.516199	-1.52919	3.49632	rols;salr	GO_BP_coexpression_predicted
anesthesia-resistant memory (GO:0007615)	2/200	0.101634	0.211673	0.252509	0.516199	-1.51885	3.47266	Sep4;SK	GO_BP_coexpression_predicted
regulation of decapentaplegic signaling pathway (GO:0090097)	2/176	0.0818752	0.211673	0.209778	0.516199	-1.38716	3.47144	pigs;Maf1	GO_BP_coexpression_predicted
Bolwig's organ development (GO:0055034)	2/200	0.101634	0.211673	0.252509	0.516199	-1.50518	3.44143	rols;tinc	GO_BP_coexpression_predicted
'de novo' pyrimidine nucleobase biosynthetic process (GO:0006207)	2/200	0.101634	0.211673	0.252509	0.516199	-1.49713	3.423	CG12384;LamC	GO_BP_coexpression_predicted
positive regulation of cell communication (GO:0010647)	2/171	0.0779278	0.211673	0.200978	0.516199	-1.33842	3.41561	pigs;CG4822	GO_BP_coexpression_predicted
positive regulation of signaling (GO:0023056)	2/171	0.0779278	0.211673	0.200978	0.516199	-1.3355	3.40815	pigs;CG4822	GO_BP_coexpression_predicted
chemical synaptic transmission (GO:0007268)	2/200	0.101634	0.211673	0.252509	0.516199	-1.4842	3.39344	Sep4;SK	GO_BP_coexpression_predicted
actin filament bundle assembly (GO:0051017)	2/200	0.101634	0.211673	0.252509	0.516199	-1.47734	3.37775	klar;rols	GO_BP_coexpression_predicted
negative regulation of cell morphogenesis involved in differentiation (GO:0010771)	2/198	0.0999393	0.211673	0.248927	0.516199	-1.46441	3.37281	tinc;tgo	GO_BP_coexpression_predicted
exocrine system development (GO:0035272)	2/181	0.0858837	0.211673	0.218621	0.516199	-1.37334	3.37123	rols;tgo	GO_BP_coexpression_predicted
imaginal disc-derived leg morphogenesis (GO:0007480)	2/162	0.0709839	0.211673	0.18527	0.516199	-1.27233	3.36569	klar;CG2926	GO_BP_coexpression_predicted
dorsal/ventral pattern formation, imaginal disc (GO:0007450)	2/167	0.0748154	0.211673	0.193974	0.516199	-1.2955	3.35889	klar;CG2926	GO_BP_coexpression_predicted
cytosolic calcium ion transport (GO:0060401)	2/200	0.101634	0.211673	0.252509	0.516199	-1.46856	3.35769	pho;Arf102F	GO_BP_coexpression_predicted
axon choice point recognition (GO:0016198)	2/200	0.101634	0.211673	0.252509	0.516199	-1.46329	3.34564	klar;tinc	GO_BP_coexpression_predicted
anterograde axonal transport (GO:0008089)	2/200	0.101634	0.211673	0.252509	0.516199	-1.46062	3.33954	NaPi-III;Sep4	GO_BP_coexpression_predicted
adenylate cyclase-activating G-protein coupled receptor signaling pathway (GO:0007189)	2/200	0.101634	0.211673	0.252509	0.516199	-1.4604	3.33903	Sep4;SK	GO_BP_coexpression_predicted
epithelial cell morphogenesis (GO:0003382)	2/200	0.101634	0.211673	0.252509	0.516199	-1.44748	3.30949	klar;tgo	GO_BP_coexpression_predicted
sensory perception of pain (GO:0019233)	2/184	0.0883171	0.211673	0.223946	0.516199	-1.35715	3.29356	Fis1;Arf102F	GO_BP_coexpression_predicted
anterograde trans-synaptic signaling (GO:0098916)	2/200	0.101634	0.211673	0.252509	0.516199	-1.4375	3.28667	Sep4;SK	GO_BP_coexpression_predicted
female genitalia development (GO:0030540)	2/200	0.101634	0.211673	0.252509	0.516199	-1.43707	3.2857	klar;rols	GO_BP_coexpression_predicted
axo-dendritic transport (GO:0008088)	2/200	0.101634	0.211673	0.252509	0.516199	-1.43527	3.28157	NaPi-III;Sep4	GO_BP_coexpression_predicted
germarium-derived female germ-line cyst encapsulation (GO:0030708)	2/179	0.0842731	0.211673	0.215079	0.516199	-1.32542	3.27867	CG2926;CG1677	GO_BP_coexpression_predicted
ameboidal-type cell migration (GO:0001667)	2/200	0.101634	0.211673	0.252509	0.516199	-1.42889	3.26698	klar;rols	GO_BP_coexpression_predicted
negative regulation of chromatin organization (GO:1905268)	2/185	0.0891329	0.211673	0.225723	0.516199	-1.34902	3.26143	CG2926;CG1677	GO_BP_coexpression_predicted
cellular calcium ion homeostasis (GO:0006874)	2/200	0.101634	0.211673	0.252509	0.516199	-1.42497	3.25803	Sep4;SK	GO_BP_coexpression_predicted
cellular response to acid chemical (GO:0071229)	2/183	0.0875037	0.211673	0.22217	0.516199	-1.33552	3.25344	Fis1;Arf102F	GO_BP_coexpression_predicted
chitin-based embryonic cuticle biosynthetic process (GO:0008362)	2/200	0.101634	0.211673	0.252509	0.516199	-1.41309	3.23086	klar;rols	GO_BP_coexpression_predicted
antennal development (GO:0007469)	2/200	0.101634	0.211673	0.252509	0.516199	-1.40162	3.20464	rols;tinc	GO_BP_coexpression_predicted
zygotic determination of anterior/posterior axis, embryo (GO:0007354)	2/167	0.0748154	0.211673	0.193974	0.516199	-1.23258	3.19575	CG1677;tgo	GO_BP_coexpression_predicted
negative regulation of cell communication (GO:0010648)	2/200	0.101634	0.211673	0.252509	0.516199	-1.39643	3.19278	Sep4;tinc	GO_BP_coexpression_predicted
adult chitin-containing cuticle pigmentation (GO:0048085)	2/200	0.101634	0.211673	0.252509	0.516199	-1.39583	3.1914	klar;rols	GO_BP_coexpression_predicted
epithelial structure maintenance (GO:0010669)	2/200	0.101634	0.211673	0.252509	0.516199	-1.39116	3.18071	klar;rols	GO_BP_coexpression_predicted
regulation of cellular protein localization (GO:1903827)	2/186	0.089951	0.211673	0.227502	0.516199	-1.31796	3.1743	CG2926;CG1677	GO_BP_coexpression_predicted
midgut development (GO:0007494)	2/200	0.101634	0.211673	0.252509	0.516199	-1.38644	3.16992	rols;tgo	GO_BP_coexpression_predicted
anterior/posterior pattern specification, imaginal disc (GO:0007448)	2/200	0.101634	0.211673	0.252509	0.516199	-1.38453	3.16556	rols;tgo	GO_BP_coexpression_predicted
cyclic-nucleotide-mediated signaling (GO:0019935)	2/200	0.101634	0.211673	0.252509	0.516199	-1.38197	3.1597	Sep4;SK	GO_BP_coexpression_predicted
histone lysine methylation (GO:0034968)	2/165	0.0732748	0.211673	0.190485	0.516199	-1.20565	3.15101	CG2926;CG1677	GO_BP_coexpression_predicted
negative regulation of microtubule polymerization or depolymerization (GO:0031111)	2/200	0.101634	0.211673	0.252509	0.516199	-1.376	3.14606	pigs;poe	GO_BP_coexpression_predicted
positive regulation of Wnt signaling pathway (GO:0030177)	2/179	0.0842731	0.211673	0.215079	0.516199	-1.27133	3.14488	CG2926;tgo	GO_BP_coexpression_predicted
positive regulation of transport (GO:0051050)	2/176	0.0818752	0.211673	0.209778	0.516199	-1.25339	3.13667	pigs;poe	GO_BP_coexpression_predicted
negative regulation of signaling (GO:0023057)	2/200	0.101634	0.211673	0.252509	0.516199	-1.36892	3.12988	Sep4;tinc	GO_BP_coexpression_predicted
motor neuron axon guidance (GO:0008045)	2/200	0.101634	0.211673	0.252509	0.516199	-1.36631	3.12391	Sep4;tinc	GO_BP_coexpression_predicted
cGMP-mediated signaling (GO:0019934)	2/200	0.101634	0.211673	0.252509	0.516199	-1.36501	3.12093	Sep4;SK	GO_BP_coexpression_predicted
chitin-based cuticle development (GO:0040003)	2/200	0.101634	0.211673	0.252509	0.516199	-1.36417	3.11902	Tm1;LamC	GO_BP_coexpression_predicted
maintenance of synapse structure (GO:0099558)	2/200	0.101634	0.211673	0.252509	0.516199	-1.36369	3.11792	Sep4;SK	GO_BP_coexpression_predicted
adenylate cyclase-inhibiting G-protein coupled receptor signaling pathway (GO:0007193)	2/200	0.101634	0.211673	0.252509	0.516199	-1.36341	3.11727	Sep4;SK	GO_BP_coexpression_predicted
negative regulation of cell fate commitment (GO:0010454)	2/200	0.101634	0.211673	0.252509	0.516199	-1.35858	3.10624	klar;CdGAPr	GO_BP_coexpression_predicted
anterior Malpighian tubule development (GO:0061327)	2/200	0.101634	0.211673	0.252509	0.516199	-1.35619	3.10076	klar;tgo	GO_BP_coexpression_predicted
regulation of myoblast fusion (GO:1901739)	2/174	0.0802887	0.211673	0.206252	0.516199	-1.22912	3.09999	pigs;Tm1	GO_BP_coexpression_predicted
epithelial cell fate determination, open tracheal system (GO:0007425)	2/200	0.101634	0.211673	0.252509	0.516199	-1.35551	3.09922	rols;salr	GO_BP_coexpression_predicted
imaginal disc-derived female genitalia development (GO:0007486)	2/200	0.101634	0.211673	0.252509	0.516199	-1.35503	3.0981	klar;rols	GO_BP_coexpression_predicted
branched-chain amino acid catabolic process (GO:0009083)	2/200	0.101634	0.211673	0.252509	0.516199	-1.35415	3.09611	CG12384;LamC	GO_BP_coexpression_predicted
negative regulation of gliogenesis (GO:0014014)	2/199	0.100785	0.211673	0.250718	0.516199	-1.34786	3.09301	CG2926;CG1677	GO_BP_coexpression_predicted
clathrin-dependent endocytosis (GO:0072583)	2/200	0.101634	0.211673	0.252509	0.516199	-1.35224	3.09174	Sep4;SK	GO_BP_coexpression_predicted
adenylate cyclase-activating adrenergic receptor signaling pathway (GO:0071880)	2/200	0.101634	0.211673	0.252509	0.516199	-1.35197	3.09112	Sep4;SK	GO_BP_coexpression_predicted
female mating behavior (GO:0060180)	2/200	0.101634	0.211673	0.252509	0.516199	-1.35117	3.08928	Sep4;tinc	GO_BP_coexpression_predicted
glycogen metabolic process (GO:0005977)	2/200	0.101634	0.211673	0.252509	0.516199	-1.34979	3.08613	CG3630;Prm	GO_BP_coexpression_predicted
Bolwig's organ morphogenesis (GO:0001746)	2/200	0.101634	0.211673	0.252509	0.516199	-1.34801	3.08206	rols;tinc	GO_BP_coexpression_predicted
establishment of cell polarity involved in gastrulation cell migration (GO:0003379)	2/200	0.101634	0.211673	0.252509	0.516199	-1.34586	3.07715	Fis1;Sep4	GO_BP_coexpression_predicted
branch fusion, open tracheal system (GO:0035147)	2/200	0.101634	0.211673	0.252509	0.516199	-1.3437	3.07222	klar;rols	GO_BP_coexpression_predicted
olfactory learning (GO:0008355)	2/200	0.101634	0.211673	0.252509	0.516199	-1.3423	3.06902	Sep4;SK	GO_BP_coexpression_predicted
branched duct epithelial cell fate determination, open tracheal system (GO:0046845)	2/200	0.101634	0.211673	0.252509	0.516199	-1.34107	3.06619	rols;salr	GO_BP_coexpression_predicted
brain segmentation (GO:0035284)	2/200	0.101634	0.211673	0.252509	0.516199	-1.34088	3.06577	salr;tinc	GO_BP_coexpression_predicted
haltere development (GO:0007482)	2/200	0.101634	0.211673	0.252509	0.516199	-1.34059	3.0651	klar;rols	GO_BP_coexpression_predicted
filopodium assembly (GO:0046847)	2/200	0.101634	0.211673	0.252509	0.516199	-1.33865	3.06067	rols;tinc	GO_BP_coexpression_predicted
antennal morphogenesis (GO:0048800)	2/200	0.101634	0.211673	0.252509	0.516199	-1.33344	3.04876	klar;rols	GO_BP_coexpression_predicted
genital disc anterior/posterior pattern formation (GO:0035224)	2/200	0.101634	0.211673	0.252509	0.516199	-1.33328	3.04839	rols;salr	GO_BP_coexpression_predicted
establishment or maintenance of cytoskeleton polarity involved in ameboidal cell migration (GO:0003371)	2/200	0.101634	0.211673	0.252509	0.516199	-1.33327	3.04835	Fis1;Sep4	GO_BP_coexpression_predicted
cAMP-mediated signaling (GO:0019933)	2/200	0.101634	0.211673	0.252509	0.516199	-1.33249	3.04659	Sep4;SK	GO_BP_coexpression_predicted
epithelial fluid transport (GO:0042045)	2/200	0.101634	0.211673	0.252509	0.516199	-1.33049	3.04201	rols;salr	GO_BP_coexpression_predicted
eye-antennal disc morphogenesis (GO:0007455)	2/200	0.101634	0.211673	0.252509	0.516199	-1.32949	3.03973	klar;rols	GO_BP_coexpression_predicted
copper ion transport (GO:0006825)	2/200	0.101634	0.211673	0.252509	0.516199	-1.32933	3.03935	Fis1;CG12384	GO_BP_coexpression_predicted
cyclic purine nucleotide metabolic process (GO:0052652)	2/200	0.101634	0.211673	0.252509	0.516199	-1.32751	3.0352	Sep4;SK	GO_BP_coexpression_predicted
establishment of epithelial cell polarity (GO:0090162)	2/200	0.101634	0.211673	0.252509	0.516199	-1.32628	3.03239	klar;rols	GO_BP_coexpression_predicted
amino acid transmembrane transport (GO:0003333)	2/200	0.101634	0.211673	0.252509	0.516199	-1.3246	3.02855	NaPi-III;Sep4	GO_BP_coexpression_predicted
adenylate cyclase-modulating G-protein coupled receptor signaling pathway (GO:0007188)	2/200	0.101634	0.211673	0.252509	0.516199	-1.31797	3.01338	Sep4;SK	GO_BP_coexpression_predicted
haltere disc development (GO:0035216)	2/200	0.101634	0.211673	0.252509	0.516199	-1.31686	3.01084	klar;rols	GO_BP_coexpression_predicted
compound eye cone cell fate commitment (GO:0042676)	2/200	0.101634	0.211673	0.252509	0.516199	-1.31645	3.00992	rols;tinc	GO_BP_coexpression_predicted
negative regulation of cell fate specification (GO:0009996)	2/185	0.0891329	0.211673	0.225723	0.516199	-1.23766	2.9922	klar;tgo	GO_BP_coexpression_predicted
negative regulation of protein depolymerization (GO:1901880)	2/200	0.101634	0.211673	0.252509	0.516199	-1.30584	2.98564	pigs;poe	GO_BP_coexpression_predicted
mitochondrial respiratory chain complex II biogenesis (GO:0097032)	2/200	0.101634	0.211673	0.252509	0.516199	-1.30447	2.98252	Fis1;Arf102F	GO_BP_coexpression_predicted
negative regulation of chromatin silencing (GO:0031936)	2/185	0.0891329	0.211673	0.225723	0.516199	-1.23185	2.97815	CG2926;CG1677	GO_BP_coexpression_predicted
aminergic neurotransmitter loading into synaptic vesicle (GO:0015842)	2/200	0.101634	0.211673	0.252509	0.516199	-1.29843	2.9687	Sep4;SK	GO_BP_coexpression_predicted
glutamate receptor signaling pathway (GO:0007215)	2/200	0.101634	0.211673	0.252509	0.516199	-1.29827	2.96833	Sep4;SK	GO_BP_coexpression_predicted
delamination (GO:0060232)	2/177	0.082672	0.211673	0.211543	0.516199	-1.19014	2.96688	CG2926;tgo	GO_BP_coexpression_predicted
positive regulation of axonogenesis (GO:0050772)	2/177	0.082672	0.211673	0.211543	0.516199	-1.18965	2.96565	klar;CG2926	GO_BP_coexpression_predicted
glial cell development (GO:0021782)	2/200	0.101634	0.211673	0.252509	0.516199	-1.29689	2.96518	rols;tinc	GO_BP_coexpression_predicted
mesoderm development (GO:0007498)	2/200	0.101634	0.211673	0.252509	0.516199	-1.29617	2.96354	rols;tinc	GO_BP_coexpression_predicted
proteasome assembly (GO:0043248)	2/194	0.0965755	0.211673	0.241771	0.516199	-1.26648	2.9603	Usp5;CkIIalpha	GO_BP_coexpression_predicted
maintenance of epithelial integrity, open tracheal system (GO:0035160)	2/200	0.101634	0.211673	0.252509	0.516199	-1.29099	2.95169	klar;rols	GO_BP_coexpression_predicted
habituation (GO:0046959)	2/200	0.101634	0.211673	0.252509	0.516199	-1.29001	2.94946	Drak;CG2926	GO_BP_coexpression_predicted
ecdysone receptor-mediated signaling pathway (GO:0035076)	2/200	0.101634	0.211673	0.252509	0.516199	-1.28834	2.94564	CG2926;CG1677	GO_BP_coexpression_predicted
detection of light stimulus involved in sensory perception (GO:0050962)	2/200	0.101634	0.211673	0.252509	0.516199	-1.2878	2.94439	NaPi-III;SK	GO_BP_coexpression_predicted
leg disc proximal/distal pattern formation (GO:0007479)	2/200	0.101634	0.211673	0.252509	0.516199	-1.28655	2.94154	rols;tinc	GO_BP_coexpression_predicted
neuromuscular junction development (GO:0007528)	2/200	0.101634	0.211673	0.252509	0.516199	-1.28107	2.92901	Sep4;SK	GO_BP_coexpression_predicted
chloride transport (GO:0006821)	2/200	0.101634	0.211673	0.252509	0.516199	-1.28055	2.92782	Sep4;SK	GO_BP_coexpression_predicted
imaginal disc pattern formation (GO:0007447)	2/200	0.101634	0.211673	0.252509	0.516199	-1.27843	2.92297	klar;rols	GO_BP_coexpression_predicted
detection of visible light (GO:0009584)	2/200	0.101634	0.211673	0.252509	0.516199	-1.27529	2.91581	Sep4;SK	GO_BP_coexpression_predicted
establishment of planar polarity (GO:0001736)	2/200	0.101634	0.211673	0.252509	0.516199	-1.2734	2.91148	klar;rols	GO_BP_coexpression_predicted
cation transport (GO:0006812)	2/200	0.101634	0.211673	0.252509	0.516199	-1.27246	2.90932	Sep4;SK	GO_BP_coexpression_predicted
inter-male aggressive behavior (GO:0002121)	2/200	0.101634	0.211673	0.252509	0.516199	-1.27118	2.90641	Sep4;tinc	GO_BP_coexpression_predicted
neuroblast development (GO:0014019)	2/200	0.101634	0.211673	0.252509	0.516199	-1.2706	2.90508	CdGAPr;tgo	GO_BP_coexpression_predicted
cellular response to radiation (GO:0071478)	2/200	0.101634	0.211673	0.252509	0.516199	-1.26932	2.90215	NaPi-III;SK	GO_BP_coexpression_predicted
male courtship behavior, veined wing vibration (GO:0016545)	2/200	0.101634	0.211673	0.252509	0.516199	-1.26793	2.89897	SK;tinc	GO_BP_coexpression_predicted
cellular response to insulin stimulus (GO:0032869)	2/200	0.101634	0.211673	0.252509	0.516199	-1.26684	2.89649	poe;CG2926	GO_BP_coexpression_predicted
mitochondrial calcium ion transmembrane transport (GO:0006851)	2/200	0.101634	0.211673	0.252509	0.516199	-1.26426	2.89058	pho;Arf102F	GO_BP_coexpression_predicted
genital disc pattern formation (GO:0035221)	2/200	0.101634	0.211673	0.252509	0.516199	-1.25931	2.87927	rols;salr	GO_BP_coexpression_predicted
mitochondrion localization (GO:0051646)	2/200	0.101634	0.211673	0.252509	0.516199	-1.25699	2.87397	poe;sls	GO_BP_coexpression_predicted
mitochondrial ATP synthesis coupled electron transport (GO:0042775)	2/200	0.101634	0.211673	0.252509	0.516199	-1.25088	2.85999	CG3630;CG4945	GO_BP_coexpression_predicted
female germ-line cyst encapsulation (GO:0048139)	2/200	0.101634	0.211673	0.252509	0.516199	-1.24978	2.85748	klar;CG1677	GO_BP_coexpression_predicted
cellular lipid biosynthetic process (GO:0097384)	2/200	0.101634	0.211673	0.252509	0.516199	-1.24931	2.8564	NaPi-III;Sep4	GO_BP_coexpression_predicted
BMP signaling pathway (GO:0030509)	2/200	0.101634	0.211673	0.252509	0.516199	-1.24804	2.85349	rols;tgo	GO_BP_coexpression_predicted
metarhodopsin inactivation (GO:0016060)	2/200	0.101634	0.211673	0.252509	0.516199	-1.24624	2.84937	Sep4;SK	GO_BP_coexpression_predicted
ganglion mother cell fate determination (GO:0007402)	2/200	0.101634	0.211673	0.252509	0.516199	-1.24576	2.84829	CdGAPr;tgo	GO_BP_coexpression_predicted
negative regulation of supramolecular fiber organization (GO:1902904)	2/200	0.101634	0.211673	0.252509	0.516199	-1.24544	2.84754	klar;poe	GO_BP_coexpression_predicted
leg disc morphogenesis (GO:0007478)	2/198	0.0999393	0.211673	0.248927	0.516199	-1.23444	2.84315	klar;CG2926	GO_BP_coexpression_predicted
regulation of eye pigmentation (GO:0048073)	2/200	0.101634	0.211673	0.252509	0.516199	-1.2417	2.83901	rols;tgo	GO_BP_coexpression_predicted
open tracheal system development (GO:0007424)	2/200	0.101634	0.211673	0.252509	0.516199	-1.24159	2.83874	klar;rols	GO_BP_coexpression_predicted
cellular respiration (GO:0045333)	2/200	0.101634	0.211673	0.252509	0.516199	-1.2402	2.83557	CG3630;CG4945	GO_BP_coexpression_predicted
establishment or maintenance of actin cytoskeleton polarity (GO:0030950)	2/200	0.101634	0.211673	0.252509	0.516199	-1.23995	2.835	klar;CG2926	GO_BP_coexpression_predicted
leg disc pattern formation (GO:0035223)	2/200	0.101634	0.211673	0.252509	0.516199	-1.23846	2.83159	rols;tinc	GO_BP_coexpression_predicted
establishment of apical/basal cell polarity (GO:0035089)	2/200	0.101634	0.211673	0.252509	0.516199	-1.23831	2.83126	klar;rols	GO_BP_coexpression_predicted
amino acid transport (GO:0006865)	2/200	0.101634	0.211673	0.252509	0.516199	-1.23831	2.83124	NaPi-III;Sep4	GO_BP_coexpression_predicted
leg disc development (GO:0035218)	2/200	0.101634	0.211673	0.252509	0.516199	-1.23731	2.82896	klar;rols	GO_BP_coexpression_predicted
cellular response to light stimulus (GO:0071482)	2/200	0.101634	0.211673	0.252509	0.516199	-1.23241	2.81776	NaPi-III;SK	GO_BP_coexpression_predicted
cGMP biosynthetic process (GO:0006182)	2/200	0.101634	0.211673	0.252509	0.516199	-1.23089	2.81428	Sep4;SK	GO_BP_coexpression_predicted
morphogenesis of follicular epithelium (GO:0016333)	2/200	0.101634	0.211673	0.252509	0.516199	-1.23052	2.81345	klar;rols	GO_BP_coexpression_predicted
epithelial tube morphogenesis (GO:0060562)	2/200	0.101634	0.211673	0.252509	0.516199	-1.2245	2.79968	klar;rols	GO_BP_coexpression_predicted
postsynaptic membrane organization (GO:0001941)	2/200	0.101634	0.211673	0.252509	0.516199	-1.22442	2.79949	SK;tinc	GO_BP_coexpression_predicted
entrainment of circadian clock by photoperiod (GO:0043153)	2/200	0.101634	0.211673	0.252509	0.516199	-1.22247	2.79503	Sep4;SK	GO_BP_coexpression_predicted
ion transport (GO:0006811)	2/200	0.101634	0.211673	0.252509	0.516199	-1.22246	2.79501	Sep4;SK	GO_BP_coexpression_predicted
glycosaminoglycan catabolic process (GO:0006027)	2/200	0.101634	0.211673	0.252509	0.516199	-1.22145	2.79269	CG7142;LamC	GO_BP_coexpression_predicted
negative regulation of transport (GO:0051051)	2/200	0.101634	0.211673	0.252509	0.516199	-1.22093	2.79152	NaPi-III;Sep4	GO_BP_coexpression_predicted
mitochondrial protein processing (GO:0034982)	2/196	0.0982532	0.211673	0.245348	0.516199	-1.2005	2.78541	Past1;CG4822	GO_BP_coexpression_predicted
gastrulation (GO:0007369)	2/188	0.0915939	0.211673	0.231063	0.516199	-1.16302	2.78006	pho;tgo	GO_BP_coexpression_predicted
filtration diaphragm assembly (GO:0036058)	2/200	0.101634	0.211673	0.252509	0.516199	-1.21123	2.76934	SK;tinc	GO_BP_coexpression_predicted
negative regulation of microtubule depolymerization (GO:0007026)	2/200	0.101634	0.211673	0.252509	0.516199	-1.21108	2.76898	pigs;poe	GO_BP_coexpression_predicted
lipid phosphorylation (GO:0046834)	2/200	0.101634	0.211673	0.252509	0.516199	-1.21103	2.76887	pigs;poe	GO_BP_coexpression_predicted
mitochondrial calcium ion homeostasis (GO:0051560)	2/200	0.101634	0.211673	0.252509	0.516199	-1.21064	2.76798	pho;Arf102F	GO_BP_coexpression_predicted
imaginal disc-derived leg segmentation (GO:0036011)	2/200	0.101634	0.211673	0.252509	0.516199	-1.20864	2.76342	klar;rols	GO_BP_coexpression_predicted
peptidyl-serine modification (GO:0018209)	2/200	0.101634	0.211673	0.252509	0.516199	-1.20827	2.76258	CdGAPr;CG2926	GO_BP_coexpression_predicted
compound eye retinal cell programmed cell death (GO:0046667)	2/200	0.101634	0.211673	0.252509	0.516199	-1.20772	2.76131	klar;rols	GO_BP_coexpression_predicted
myotube differentiation (GO:0014902)	2/200	0.101634	0.211673	0.252509	0.516199	-1.20755	2.76091	klar;pigs	GO_BP_coexpression_predicted
establishment of epithelial cell planar polarity (GO:0090163)	2/200	0.101634	0.211673	0.252509	0.516199	-1.20537	2.75594	pho;tgo	GO_BP_coexpression_predicted
establishment of epithelial cell apical/basal polarity (GO:0045198)	2/200	0.101634	0.211673	0.252509	0.516199	-1.20505	2.75521	klar;rols	GO_BP_coexpression_predicted
neuromuscular synaptic transmission (GO:0007274)	2/200	0.101634	0.211673	0.252509	0.516199	-1.20476	2.75454	Sep4;SK	GO_BP_coexpression_predicted
axonal transport (GO:0098930)	2/200	0.101634	0.211673	0.252509	0.516199	-1.20458	2.75413	NaPi-III;Sep4	GO_BP_coexpression_predicted
larval visceral muscle development (GO:0007523)	2/200	0.101634	0.211673	0.252509	0.516199	-1.20436	2.75363	rols;tinc	GO_BP_coexpression_predicted
positive regulation of adenylate cyclase activity (GO:0045762)	2/200	0.101634	0.211673	0.252509	0.516199	-1.20426	2.7534	Sep4;SK	GO_BP_coexpression_predicted
cellular glucan metabolic process (GO:0006073)	2/200	0.101634	0.211673	0.252509	0.516199	-1.20417	2.75318	CG3630;sls	GO_BP_coexpression_predicted
mitochondrial transmembrane transport (GO:1990542)	2/200	0.101634	0.211673	0.252509	0.516199	-1.20407	2.75296	Fis1;Arf102F	GO_BP_coexpression_predicted
neuropeptide signaling pathway (GO:0007218)	2/200	0.101634	0.211673	0.252509	0.516199	-1.20282	2.7501	Sep4;SK	GO_BP_coexpression_predicted
imaginal disc-derived leg joint morphogenesis (GO:0016348)	2/200	0.101634	0.211673	0.252509	0.516199	-1.20226	2.74881	klar;rols	GO_BP_coexpression_predicted
imaginal disc-derived wing hair organization (GO:0035317)	2/200	0.101634	0.211673	0.252509	0.516199	-1.20223	2.74875	klar;rols	GO_BP_coexpression_predicted
cGMP metabolic process (GO:0046068)	2/200	0.101634	0.211673	0.252509	0.516199	-1.2014	2.74685	Sep4;SK	GO_BP_coexpression_predicted
muscle cell fate commitment (GO:0042693)	2/200	0.101634	0.211673	0.252509	0.516199	-1.20105	2.74606	rols;tinc	GO_BP_coexpression_predicted
blastoderm segmentation (GO:0007350)	2/200	0.101634	0.211673	0.252509	0.516199	-1.20097	2.74588	CG1677;tgo	GO_BP_coexpression_predicted
negative regulation of glial cell proliferation (GO:0060253)	2/199	0.100785	0.211673	0.250718	0.516199	-1.19559	2.74358	CG2926;CG1677	GO_BP_coexpression_predicted
regulation of cell migration (GO:0030334)	2/200	0.101634	0.211673	0.252509	0.516199	-1.19808	2.73928	klar;rols	GO_BP_coexpression_predicted
myoblast fusion (GO:0007520)	2/200	0.101634	0.211673	0.252509	0.516199	-1.19582	2.7341	klar;pigs	GO_BP_coexpression_predicted
establishment or maintenance of cytoskeleton polarity involved in gastrulation (GO:0003380)	2/200	0.101634	0.211673	0.252509	0.516199	-1.19528	2.73286	Fis1;Sep4	GO_BP_coexpression_predicted
chitin biosynthetic process (GO:0006031)	2/200	0.101634	0.211673	0.252509	0.516199	-1.19324	2.7282	rols;LamC	GO_BP_coexpression_predicted
negative regulation of cell size (GO:0045792)	2/200	0.101634	0.211673	0.252509	0.516199	-1.19294	2.72752	CG2926;CG1677	GO_BP_coexpression_predicted
regulation of axon extension involved in axon guidance (GO:0048841)	2/200	0.101634	0.211673	0.252509	0.516199	-1.19267	2.72691	klar;tinc	GO_BP_coexpression_predicted
nonassociative learning (GO:0046958)	2/200	0.101634	0.211673	0.252509	0.516199	-1.19237	2.72621	Drak;CG2926	GO_BP_coexpression_predicted
medium-term memory (GO:0072375)	2/200	0.101634	0.211673	0.252509	0.516199	-1.19023	2.72133	Sep4;SK	GO_BP_coexpression_predicted
intracellular steroid hormone receptor signaling pathway (GO:0030518)	2/199	0.100785	0.211673	0.250718	0.516199	-1.18181	2.71196	CG2926;CG1677	GO_BP_coexpression_predicted
regulation of cell communication (GO:0010646)	2/200	0.101634	0.211673	0.252509	0.516199	-1.18469	2.70865	Sep4;SK	GO_BP_coexpression_predicted
regulation of microtubule depolymerization (GO:0031114)	2/200	0.101634	0.211673	0.252509	0.516199	-1.18412	2.70735	pigs;poe	GO_BP_coexpression_predicted
heart process (GO:0003015)	2/200	0.101634	0.211673	0.252509	0.516199	-1.18284	2.70442	rols;tinc	GO_BP_coexpression_predicted
negative energy taxis (GO:0052129)	2/200	0.101634	0.211673	0.252509	0.516199	-1.18148	2.70132	NaPi-III;SK	GO_BP_coexpression_predicted
nuclear division (GO:0000280)	2/200	0.101634	0.211673	0.252509	0.516199	-1.1814	2.70114	Usp5;CG1677	GO_BP_coexpression_predicted
regulation of regulated secretory pathway (GO:1903305)	2/200	0.101634	0.211673	0.252509	0.516199	-1.18036	2.69876	Sep4;SK	GO_BP_coexpression_predicted
polarized epithelial cell differentiation (GO:0030859)	2/200	0.101634	0.211673	0.252509	0.516199	-1.1749	2.68626	klar;rols	GO_BP_coexpression_predicted
maternal specification of dorsal/ventral axis, oocyte, soma encoded (GO:0007313)	2/200	0.101634	0.211673	0.252509	0.516199	-1.17486	2.68619	rols;salr	GO_BP_coexpression_predicted
regulation of establishment of planar polarity (GO:0090175)	2/200	0.101634	0.211673	0.252509	0.516199	-1.17388	2.68393	CdGAPr;tinc	GO_BP_coexpression_predicted
pyrimidine nucleobase biosynthetic process (GO:0019856)	2/200	0.101634	0.211673	0.252509	0.516199	-1.16776	2.66993	CG12384;LamC	GO_BP_coexpression_predicted
energy reserve metabolic process (GO:0006112)	2/200	0.101634	0.211673	0.252509	0.516199	-1.16759	2.66956	CG3630;sls	GO_BP_coexpression_predicted
mitochondrial respiratory chain complex III biogenesis (GO:0097033)	2/200	0.101634	0.211673	0.252509	0.516199	-1.1647	2.66295	CG3630;CG4945	GO_BP_coexpression_predicted
epithelial tube formation (GO:0072175)	2/200	0.101634	0.211673	0.252509	0.516199	-1.16441	2.66229	rols;salr	GO_BP_coexpression_predicted
protein O-linked mannosylation (GO:0035269)	2/200	0.101634	0.211673	0.252509	0.516199	-1.16403	2.66141	rols;tinc	GO_BP_coexpression_predicted
G-protein coupled receptor signaling pathway, coupled to cyclic nucleotide second messenger (GO:0007187)	2/200	0.101634	0.211673	0.252509	0.516199	-1.16216	2.65713	Sep4;SK	GO_BP_coexpression_predicted
short-term memory (GO:0007614)	2/200	0.101634	0.211673	0.252509	0.516199	-1.16192	2.65659	Sep4;SK	GO_BP_coexpression_predicted
imaginal disc morphogenesis (GO:0007560)	2/200	0.101634	0.211673	0.252509	0.516199	-1.16059	2.65354	klar;rols	GO_BP_coexpression_predicted
basement membrane organization (GO:0071711)	2/200	0.101634	0.211673	0.252509	0.516199	-1.15891	2.64971	pigs;CG4822	GO_BP_coexpression_predicted
regulation of olfactory learning (GO:0090328)	2/200	0.101634	0.211673	0.252509	0.516199	-1.15784	2.64726	Sep4;SK	GO_BP_coexpression_predicted
mitochondrial respiratory chain complex II assembly (GO:0034553)	2/200	0.101634	0.211673	0.252509	0.516199	-1.15573	2.64244	Fis1;Arf102F	GO_BP_coexpression_predicted
negative regulation of peptide secretion (GO:0002792)	2/200	0.101634	0.211673	0.252509	0.516199	-1.15527	2.64139	CdGAPr;Imp	GO_BP_coexpression_predicted
negative regulation of stem cell differentiation (GO:2000737)	2/200	0.101634	0.211673	0.252509	0.516199	-1.155	2.64078	CG2926;CG1677	GO_BP_coexpression_predicted
maintenance of presynaptic active zone structure (GO:0048790)	2/200	0.101634	0.211673	0.252509	0.516199	-1.15468	2.64004	Sep4;SK	GO_BP_coexpression_predicted
mitochondrial electron transport, NADH to ubiquinone (GO:0006120)	2/200	0.101634	0.211673	0.252509	0.516199	-1.15462	2.63989	CG3630;CG4945	GO_BP_coexpression_predicted
neuroblast differentiation (GO:0014016)	2/200	0.101634	0.211673	0.252509	0.516199	-1.15462	2.63989	CdGAPr;tgo	GO_BP_coexpression_predicted
positive regulation of phosphatidylinositol 3-kinase signaling (GO:0014068)	2/200	0.101634	0.211673	0.252509	0.516199	-1.15335	2.637	pigs;poe	GO_BP_coexpression_predicted
negative chemotaxis (GO:0050919)	2/200	0.101634	0.211673	0.252509	0.516199	-1.1516	2.63299	rols;tinc	GO_BP_coexpression_predicted
negative regulation of lipid catabolic process (GO:0050995)	2/200	0.101634	0.211673	0.252509	0.516199	-1.15159	2.63297	Drak;CG2926	GO_BP_coexpression_predicted
mesodermal cell fate determination (GO:0007500)	2/200	0.101634	0.211673	0.252509	0.516199	-1.1512	2.63209	pho;tgo	GO_BP_coexpression_predicted
mating behavior, sex discrimination (GO:0048047)	2/200	0.101634	0.211673	0.252509	0.516199	-1.14046	2.60752	Sep4;SK	GO_BP_coexpression_predicted
neurotransmitter transport (GO:0006836)	2/200	0.101634	0.211673	0.252509	0.516199	-1.14026	2.60707	Sep4;SK	GO_BP_coexpression_predicted
peptidyl-serine phosphorylation (GO:0018105)	2/200	0.101634	0.211673	0.252509	0.516199	-1.13878	2.60369	CdGAPr;CG2926	GO_BP_coexpression_predicted
modulation of chemical synaptic transmission (GO:0050804)	2/200	0.101634	0.211673	0.252509	0.516199	-1.1386	2.60327	Sep4;SK	GO_BP_coexpression_predicted
synapse assembly (GO:0007416)	2/200	0.101634	0.211673	0.252509	0.516199	-1.13748	2.60072	Sep4;tinc	GO_BP_coexpression_predicted
neurotransmitter biosynthetic process (GO:0042136)	2/200	0.101634	0.211673	0.252509	0.516199	-1.13687	2.59933	Sep4;SK	GO_BP_coexpression_predicted
regulation of feeding behavior (GO:0060259)	2/200	0.101634	0.211673	0.252509	0.516199	-1.13668	2.59888	Sep4;pigs	GO_BP_coexpression_predicted
extracellular matrix assembly (GO:0085029)	2/200	0.101634	0.211673	0.252509	0.516199	-1.13086	2.58558	pigs;Pxn	GO_BP_coexpression_predicted
regulation of neuronal synaptic plasticity (GO:0048168)	2/200	0.101634	0.211673	0.252509	0.516199	-1.12894	2.58119	Sep4;SK	GO_BP_coexpression_predicted
tube fusion (GO:0035146)	2/200	0.101634	0.211673	0.252509	0.516199	-1.12863	2.58049	klar;rols	GO_BP_coexpression_predicted
regulation of heart contraction (GO:0008016)	2/200	0.101634	0.211673	0.252509	0.516199	-1.12486	2.57185	Sep4;SK	GO_BP_coexpression_predicted
amnioserosa maintenance (GO:0046665)	2/200	0.101634	0.211673	0.252509	0.516199	-1.12462	2.57131	klar;tgo	GO_BP_coexpression_predicted
negative regulation of histone methylation (GO:0031061)	2/200	0.101634	0.211673	0.252509	0.516199	-1.1237	2.56922	CG1677;tgo	GO_BP_coexpression_predicted
cellular zinc ion homeostasis (GO:0006882)	2/200	0.101634	0.211673	0.252509	0.516199	-1.12193	2.56516	Past1;CG4822	GO_BP_coexpression_predicted
cell morphogenesis involved in differentiation (GO:0000904)	2/199	0.100785	0.211673	0.250718	0.516199	-1.11698	2.56321	klar;rols	GO_BP_coexpression_predicted
histone demethylation (GO:0016577)	2/200	0.101634	0.211673	0.252509	0.516199	-1.12059	2.5621	CG1677;tgo	GO_BP_coexpression_predicted
imaginal disc eversion (GO:0007561)	2/200	0.101634	0.211673	0.252509	0.516199	-1.12029	2.56142	klar;rols	GO_BP_coexpression_predicted
negative regulation of synaptic transmission (GO:0050805)	2/200	0.101634	0.211673	0.252509	0.516199	-1.11739	2.55479	Sep4;SK	GO_BP_coexpression_predicted
synaptic target inhibition (GO:0016201)	2/200	0.101634	0.211673	0.252509	0.516199	-1.11494	2.54918	Sep4;tinc	GO_BP_coexpression_predicted
jump response (GO:0007630)	2/200	0.101634	0.211673	0.252509	0.516199	-1.11358	2.54607	Sep4;SK	GO_BP_coexpression_predicted
regulation of axon extension (GO:0030516)	2/200	0.101634	0.211673	0.252509	0.516199	-1.10858	2.53463	klar;CdGAPr	GO_BP_coexpression_predicted
positive regulation of circadian sleep/wake cycle, sleep (GO:0045938)	2/200	0.101634	0.211673	0.252509	0.516199	-1.1085	2.53445	Sep4;SK	GO_BP_coexpression_predicted
positive regulation of DNA metabolic process (GO:0051054)	2/200	0.101634	0.211673	0.252509	0.516199	-1.1079	2.53307	CG2926;CG1677	GO_BP_coexpression_predicted
inositol lipid-mediated signaling (GO:0048017)	2/200	0.101634	0.211673	0.252509	0.516199	-1.10678	2.53052	poe;CG2926	GO_BP_coexpression_predicted
membrane fusion (GO:0061025)	2/200	0.101634	0.211673	0.252509	0.516199	-1.10524	2.527	Past1;CG4822	GO_BP_coexpression_predicted
phosphatidylinositol-mediated signaling (GO:0048015)	2/200	0.101634	0.211673	0.252509	0.516199	-1.10234	2.52037	poe;CG2926	GO_BP_coexpression_predicted
R7 cell differentiation (GO:0045466)	2/200	0.101634	0.211673	0.252509	0.516199	-1.10148	2.5184	klar;tinc	GO_BP_coexpression_predicted
organelle fusion (GO:0048284)	2/200	0.101634	0.211673	0.252509	0.516199	-1.09913	2.51303	Past1;CG4822	GO_BP_coexpression_predicted
melanin biosynthetic process (GO:0042438)	2/200	0.101634	0.211673	0.252509	0.516199	-1.09895	2.51262	Tm1;LamC	GO_BP_coexpression_predicted
negative regulation of gene silencing (GO:0060969)	2/193	0.0957398	0.211673	0.239984	0.516199	-1.06993	2.51018	CG2926;CG1677	GO_BP_coexpression_predicted
negative phototaxis (GO:0046957)	2/200	0.101634	0.211673	0.252509	0.516199	-1.09588	2.5056	NaPi-III;SK	GO_BP_coexpression_predicted
ion transmembrane transport (GO:0034220)	2/200	0.101634	0.211673	0.252509	0.516199	-1.09552	2.50479	Sep4;SK	GO_BP_coexpression_predicted
phosphatidylinositol phosphorylation (GO:0046854)	2/200	0.101634	0.211673	0.252509	0.516199	-1.09515	2.50392	pigs;poe	GO_BP_coexpression_predicted
regulation of secretion by cell (GO:1903530)	2/200	0.101634	0.211673	0.252509	0.516199	-1.09139	2.49533	Sep4;SK	GO_BP_coexpression_predicted
neurotransmitter loading into synaptic vesicle (GO:0098700)	2/200	0.101634	0.211673	0.252509	0.516199	-1.09107	2.49461	Sep4;SK	GO_BP_coexpression_predicted
regulation of neurological system process (GO:0031644)	2/200	0.101634	0.211673	0.252509	0.516199	-1.09041	2.49309	Sep4;SK	GO_BP_coexpression_predicted
photoreceptor cell axon guidance (GO:0072499)	2/200	0.101634	0.211673	0.252509	0.516199	-1.08965	2.49137	rols;tinc	GO_BP_coexpression_predicted
peptidoglycan metabolic process (GO:0000270)	2/200	0.101634	0.211673	0.252509	0.516199	-1.0887	2.48917	CG7142;LamC	GO_BP_coexpression_predicted
peptidoglycan catabolic process (GO:0009253)	2/200	0.101634	0.211673	0.252509	0.516199	-1.08562	2.48215	CG7142;LamC	GO_BP_coexpression_predicted
positive regulation of receptor-mediated endocytosis (GO:0048260)	2/200	0.101634	0.211673	0.252509	0.516199	-1.08533	2.48149	Sep4;SK	GO_BP_coexpression_predicted
respiratory chain complex II assembly (GO:0034552)	2/200	0.101634	0.211673	0.252509	0.516199	-1.0839	2.47821	Fis1;Arf102F	GO_BP_coexpression_predicted
nitrogen compound transport (GO:0071705)	2/200	0.101634	0.211673	0.252509	0.516199	-1.08366	2.47765	NaPi-III;Sep4	GO_BP_coexpression_predicted
receptor metabolic process (GO:0043112)	2/200	0.101634	0.211673	0.252509	0.516199	-1.08194	2.47373	NaPi-III;Sep4	GO_BP_coexpression_predicted
positive regulation of cytosolic calcium ion concentration (GO:0007204)	2/200	0.101634	0.211673	0.252509	0.516199	-1.08074	2.47099	Sep4;SK	GO_BP_coexpression_predicted
proboscis development (GO:0048728)	2/200	0.101634	0.211673	0.252509	0.516199	-1.0761	2.46037	rols;tinc	GO_BP_coexpression_predicted
photoperiodism (GO:0009648)	2/200	0.101634	0.211673	0.252509	0.516199	-1.0746	2.45695	Sep4;SK	GO_BP_coexpression_predicted
microvillus organization (GO:0032528)	2/200	0.101634	0.211673	0.252509	0.516199	-1.07178	2.4505	klar;rols	GO_BP_coexpression_predicted
regulation of biosynthetic process of antibacterial peptides active against Gram-negative bacteria (GO:0002813)	2/200	0.101634	0.211673	0.252509	0.516199	-1.06999	2.44641	pigs;CG4822	GO_BP_coexpression_predicted
regulation of neuromuscular synaptic transmission (GO:1900073)	2/200	0.101634	0.211673	0.252509	0.516199	-1.06936	2.44497	Sep4;SK	GO_BP_coexpression_predicted
photoreceptor cell fate specification (GO:0043704)	2/200	0.101634	0.211673	0.252509	0.516199	-1.06646	2.43834	klar;rols	GO_BP_coexpression_predicted
regulation of cytosolic calcium ion concentration (GO:0051480)	2/200	0.101634	0.211673	0.252509	0.516199	-1.06384	2.43234	Sep4;SK	GO_BP_coexpression_predicted
organelle membrane fusion (GO:0090174)	2/200	0.101634	0.211673	0.252509	0.516199	-1.06365	2.43191	Fis1;Sep4	GO_BP_coexpression_predicted
proximal/distal pattern formation (GO:0009954)	2/200	0.101634	0.211673	0.252509	0.516199	-1.06328	2.43106	klar;rols	GO_BP_coexpression_predicted
synaptic vesicle endocytosis (GO:0048488)	2/200	0.101634	0.211673	0.252509	0.516199	-1.06168	2.42741	Sep4;SK	GO_BP_coexpression_predicted
wing and notum subfield formation (GO:0035309)	2/200	0.101634	0.211673	0.252509	0.516199	-1.06103	2.42592	rols;salr	GO_BP_coexpression_predicted
negative regulation of gene silencing by RNA (GO:0060967)	2/200	0.101634	0.211673	0.252509	0.516199	-1.06003	2.42364	NaPi-III;Sep4	GO_BP_coexpression_predicted
perineurial glial growth (GO:0042066)	2/200	0.101634	0.211673	0.252509	0.516199	-1.05568	2.41368	Msp300;sls	GO_BP_coexpression_predicted
positive regulation of chromatin assembly or disassembly (GO:0045799)	2/200	0.101634	0.211673	0.252509	0.516199	-1.05412	2.41013	CG2926;CG1677	GO_BP_coexpression_predicted
protein localization to synapse (GO:0035418)	2/200	0.101634	0.211673	0.252509	0.516199	-1.05368	2.40911	poe;CG2926	GO_BP_coexpression_predicted
synaptic vesicle membrane organization (GO:0048499)	2/200	0.101634	0.211673	0.252509	0.516199	-1.0533	2.40824	Sep4;SK	GO_BP_coexpression_predicted
regulation of neurotransmitter transport (GO:0051588)	2/200	0.101634	0.211673	0.252509	0.516199	-1.05164	2.40445	Sep4;SK	GO_BP_coexpression_predicted
regulation of short-term neuronal synaptic plasticity (GO:0048172)	2/200	0.101634	0.211673	0.252509	0.516199	-1.04943	2.39939	Sep4;SK	GO_BP_coexpression_predicted
regulation of circadian sleep/wake cycle, sleep (GO:0045187)	2/200	0.101634	0.211673	0.252509	0.516199	-1.04902	2.39847	Sep4;SK	GO_BP_coexpression_predicted
synaptic vesicle recycling (GO:0036465)	2/200	0.101634	0.211673	0.252509	0.516199	-1.04792	2.39596	Sep4;SK	GO_BP_coexpression_predicted
mitochondrial respiratory chain complex III assembly (GO:0034551)	2/200	0.101634	0.211673	0.252509	0.516199	-1.04758	2.39516	CG3630;CG4945	GO_BP_coexpression_predicted
regulation of actin nucleation (GO:0051125)	2/200	0.101634	0.211673	0.252509	0.516199	-1.04707	2.39399	Sep4;pigs	GO_BP_coexpression_predicted
visceral muscle development (GO:0007522)	2/200	0.101634	0.211673	0.252509	0.516199	-1.04567	2.39079	SK;tinc	GO_BP_coexpression_predicted
regulated exocytosis (GO:0045055)	2/200	0.101634	0.211673	0.252509	0.516199	-1.04457	2.38829	Sep4;SK	GO_BP_coexpression_predicted
postsynaptic membrane assembly (GO:0097104)	2/200	0.101634	0.211673	0.252509	0.516199	-1.04037	2.37868	Sep4;SK	GO_BP_coexpression_predicted
octopamine or tyramine signaling pathway (GO:0007211)	2/200	0.101634	0.211673	0.252509	0.516199	-1.03632	2.36942	Sep4;SK	GO_BP_coexpression_predicted
phospholipase C-activating G-protein coupled receptor signaling pathway (GO:0007200)	2/200	0.101634	0.211673	0.252509	0.516199	-1.0362	2.36914	Sep4;SK	GO_BP_coexpression_predicted
regulation of calcium ion-dependent exocytosis (GO:0017158)	2/200	0.101634	0.211673	0.252509	0.516199	-1.03383	2.36373	Sep4;SK	GO_BP_coexpression_predicted
glial cell growth (GO:0042065)	2/200	0.101634	0.211673	0.252509	0.516199	-1.02605	2.34594	NaPi-III;Msp300	GO_BP_coexpression_predicted
purine ribonucleotide biosynthetic process (GO:0009152)	2/200	0.101634	0.211673	0.252509	0.516199	-1.02484	2.34318	Sep4;SK	GO_BP_coexpression_predicted
regulation of metal ion transport (GO:0010959)	2/200	0.101634	0.211673	0.252509	0.516199	-1.02288	2.33869	Sep4;SK	GO_BP_coexpression_predicted
transport along microtubule (GO:0010970)	2/200	0.101634	0.211673	0.252509	0.516199	-1.02241	2.33763	pigs;poe	GO_BP_coexpression_predicted
positive regulation of cell-cell adhesion (GO:0022409)	2/200	0.101634	0.211673	0.252509	0.516199	-1.02225	2.33725	pigs;CG4822	GO_BP_coexpression_predicted
regulation of transforming growth factor beta receptor signaling pathway (GO:0017015)	2/200	0.101634	0.211673	0.252509	0.516199	-1.01981	2.33168	pho;tgo	GO_BP_coexpression_predicted
positive regulation of protein polymerization (GO:0032273)	2/200	0.101634	0.211673	0.252509	0.516199	-1.01397	2.31832	CG2926;CG1677	GO_BP_coexpression_predicted
positive regulation of organelle assembly (GO:1902117)	2/200	0.101634	0.211673	0.252509	0.516199	-1.01236	2.31464	CG2926;CG1677	GO_BP_coexpression_predicted
R8 cell fate specification (GO:0045464)	2/200	0.101634	0.211673	0.252509	0.516199	-1.01078	2.31103	klar;rols	GO_BP_coexpression_predicted
vesicle-mediated transport in synapse (GO:0099003)	2/200	0.101634	0.211673	0.252509	0.516199	-1.0075	2.30353	Sep4;SK	GO_BP_coexpression_predicted
stabilization of membrane potential (GO:0030322)	2/200	0.101634	0.211673	0.252509	0.516199	-1.00606	2.30024	Sep4;SK	GO_BP_coexpression_predicted
respiratory system development (GO:0060541)	2/200	0.101634	0.211673	0.252509	0.516199	-1.0048	2.29736	klar;rols	GO_BP_coexpression_predicted
regulation of imaginal disc growth (GO:0045570)	2/200	0.101634	0.211673	0.252509	0.516199	-0.999252	2.28467	klar;CG2926	GO_BP_coexpression_predicted
regulation of rhodopsin gene expression (GO:0007468)	2/200	0.101634	0.211673	0.252509	0.516199	-0.99835	2.28261	SK;tinc	GO_BP_coexpression_predicted
regulation of glucose metabolic process (GO:0010906)	2/200	0.101634	0.211673	0.252509	0.516199	-0.996748	2.27895	Sep4;SK	GO_BP_coexpression_predicted
synaptic vesicle localization (GO:0097479)	2/200	0.101634	0.211673	0.252509	0.516199	-0.994853	2.27461	Sep4;SK	GO_BP_coexpression_predicted
response to amino acid (GO:0043200)	2/200	0.101634	0.211673	0.252509	0.516199	-0.992312	2.2688	Fis1;Arf102F	GO_BP_coexpression_predicted
regulation of gastrulation (GO:0010470)	2/200	0.101634	0.211673	0.252509	0.516199	-0.988714	2.26058	Fis1;Sep4	GO_BP_coexpression_predicted
wing disc proximal/distal pattern formation (GO:0007473)	2/200	0.101634	0.211673	0.252509	0.516199	-0.985164	2.25246	rols;salr	GO_BP_coexpression_predicted
regulation of Rab protein signal transduction (GO:0032483)	2/200	0.101634	0.211673	0.252509	0.516199	-0.984036	2.24988	poe;CG2926	GO_BP_coexpression_predicted
regulation of stress-activated MAPK cascade (GO:0032872)	2/200	0.101634	0.211673	0.252509	0.516199	-0.983534	2.24873	poe;CG2926	GO_BP_coexpression_predicted
regulation of compound eye pigmentation (GO:0048076)	2/200	0.101634	0.211673	0.252509	0.516199	-0.98335	2.24831	rols;salr	GO_BP_coexpression_predicted
positive regulation of RNA polymerase II transcriptional preinitiation complex assembly (GO:0045899)	2/200	0.101634	0.211673	0.252509	0.516199	-0.982332	2.24599	CG4822;CkIIalpha	GO_BP_coexpression_predicted
regulation of tube size, open tracheal system (GO:0035151)	2/200	0.101634	0.211673	0.252509	0.516199	-0.981643	2.24441	rols;salr	GO_BP_coexpression_predicted
respiratory electron transport chain (GO:0022904)	2/200	0.101634	0.211673	0.252509	0.516199	-0.980723	2.24231	CG3630;CG4945	GO_BP_coexpression_predicted
regulation of neurotransmitter secretion (GO:0046928)	2/200	0.101634	0.211673	0.252509	0.516199	-0.980663	2.24217	Sep4;SK	GO_BP_coexpression_predicted
rhabdomere morphogenesis (GO:0061541)	2/200	0.101634	0.211673	0.252509	0.516199	-0.969443	2.21652	SK;tinc	GO_BP_coexpression_predicted
regulation of intracellular pH (GO:0051453)	2/200	0.101634	0.211673	0.252509	0.516199	-0.968425	2.21419	Sep4;SK	GO_BP_coexpression_predicted
regulation of cellular pH (GO:0030641)	2/200	0.101634	0.211673	0.252509	0.516199	-0.968051	2.21333	Sep4;SK	GO_BP_coexpression_predicted
regulation of circadian sleep/wake cycle (GO:0042749)	2/200	0.101634	0.211673	0.252509	0.516199	-0.96766	2.21244	Sep4;SK	GO_BP_coexpression_predicted
zinc ion homeostasis (GO:0055069)	2/200	0.101634	0.211673	0.252509	0.516199	-0.964927	2.20619	Past1;CG4822	GO_BP_coexpression_predicted
regulation of phagocytosis (GO:0050764)	2/200	0.101634	0.211673	0.252509	0.516199	-0.962722	2.20115	pigs;Pxn	GO_BP_coexpression_predicted
positive regulation of biosynthetic process of antibacterial peptides active against Gram-negative bacteria (GO:0006964)	2/200	0.101634	0.211673	0.252509	0.516199	-0.960809	2.19677	pigs;CG4822	GO_BP_coexpression_predicted
respiratory chain complex III assembly (GO:0017062)	2/200	0.101634	0.211673	0.252509	0.516199	-0.958932	2.19248	CG3630;CG4945	GO_BP_coexpression_predicted
second mitotic wave involved in compound eye morphogenesis (GO:0016330)	2/200	0.101634	0.211673	0.252509	0.516199	-0.95696	2.18798	klar;rols	GO_BP_coexpression_predicted
synaptic transmission, cholinergic (GO:0007271)	2/200	0.101634	0.211673	0.252509	0.516199	-0.955113	2.18375	Sep4;SK	GO_BP_coexpression_predicted
response to ethanol (GO:0045471)	2/200	0.101634	0.211673	0.252509	0.516199	-0.954912	2.18329	NaPi-III;Sep4	GO_BP_coexpression_predicted
protein monoubiquitination (GO:0006513)	2/200	0.101634	0.211673	0.252509	0.516199	-0.953619	2.18034	CG2926;CG1677	GO_BP_coexpression_predicted
regulation of sodium ion transport (GO:0002028)	2/200	0.101634	0.211673	0.252509	0.516199	-0.947349	2.166	Sep4;SK	GO_BP_coexpression_predicted
synaptic vesicle budding (GO:0070142)	2/200	0.101634	0.211673	0.252509	0.516199	-0.93307	2.13335	NaPi-III;Sep4	GO_BP_coexpression_predicted
regulation of synapse assembly (GO:0051963)	2/200	0.101634	0.211673	0.252509	0.516199	-0.925286	2.11556	Sep4;tinc	GO_BP_coexpression_predicted
segmentation (GO:0035282)	2/200	0.101634	0.211673	0.252509	0.516199	-0.903104	2.06484	CG1677;tgo	GO_BP_coexpression_predicted
regulation of exit from mitosis (GO:0007096)	2/200	0.101634	0.211673	0.252509	0.516199	-0.892826	2.04134	CG2926;CG1677	GO_BP_coexpression_predicted
regulation of synaptic vesicle exocytosis (GO:2000300)	2/200	0.101634	0.211673	0.252509	0.516199	-0.890327	2.03563	Sep4;SK	GO_BP_coexpression_predicted
regulation of nucleocytoplasmic transport (GO:0046822)	2/200	0.101634	0.211673	0.252509	0.516199	-0.877385	2.00604	CG2926;CG1677	GO_BP_coexpression_predicted
transition metal ion transport (GO:0000041)	2/200	0.101634	0.211673	0.252509	0.516199	-0.871037	1.99152	pigs;CG4822	GO_BP_coexpression_predicted
regulation of RNA polymerase II transcriptional preinitiation complex assembly (GO:0045898)	2/200	0.101634	0.211673	0.252509	0.516199	-0.868471	1.98566	CG4822;CkIIalpha	GO_BP_coexpression_predicted
regulation of transferase activity (GO:0051338)	2/200	0.101634	0.211673	0.252509	0.516199	-0.863425	1.97412	NaPi-III;Sep4	GO_BP_coexpression_predicted
regulation of peptidoglycan recognition protein signaling pathway (GO:0061058)	2/200	0.101634	0.211673	0.252509	0.516199	-0.854187	1.953	CG7142;LamC	GO_BP_coexpression_predicted
vesicle transport along microtubule (GO:0047496)	2/200	0.101634	0.211673	0.252509	0.516199	-0.835235	1.90966	NaPi-III;Sep4	GO_BP_coexpression_predicted
regulation of autophagy (GO:0010506)	1/72	0.177173	0.212071	0.277536	0.340808	-1.25533	2.17251	CG12384	GO_BP_2018
sensory perception of mechanical stimulus (GO:0050954)	1/72	0.177173	0.212071	0.277536	0.340808	-1.22505	2.12011	salr	GO_BP_2018
negative regulation of macromolecule metabolic process (GO:0010605)	1/73	0.179403	0.212593	0.280761	0.341232	-1.28207	2.20275	pho	GO_BP_2018
chromatin remodeling (GO:0006338)	1/73	0.179403	0.212593	0.280761	0.341232	-1.19643	2.05562	pho	GO_BP_2018
deadenylation-dependent decapping of nuclear-transcribed mRNA (GO:0000290)	1/40	0.102598	0.212882	0.179339	0.516199	-1.40134	3.19076	tgo	GO_BP_coexpression_predicted
positive regulation of transcription from RNA polymerase II promoter (GO:0045944)	1/40	0.102598	0.212882	0.179339	0.516199	-1.31351	2.99078	tgo	GO_BP_coexpression_predicted
regulation_of_lipid_biosynthetic_process_(GO:0046890)	2/66	0.0137439	0.21345	0.0479827	0.650941	-2.37005	10.1608	klar;Drak	GO_BP_autoRIF_predicted_zscore
ATP_metabolic_process_(GO:0046034)	3/200	0.0168163	0.21345	0.0869581	0.650941	-2.4599	10.0497	klar;rols;CdGAPr	GO_BP_autoRIF_predicted_zscore
ATP_biosynthetic_process_(GO:0006754)	3/200	0.0168163	0.21345	0.0869581	0.650941	-2.45969	10.0488	klar;rols;CdGAPr	GO_BP_autoRIF_predicted_zscore
covalent_chromatin_modification_(GO:0016569)	3/200	0.0168163	0.21345	0.0869581	0.650941	-2.34882	9.59588	CG3918;CG1677;tgo	GO_BP_autoRIF_predicted_zscore
carbohydrate_homeostasis_(GO:0033500)	3/200	0.0168163	0.21345	0.0869581	0.650941	-2.1778	8.89719	klar;rols;tinc	GO_BP_autoRIF_predicted_zscore
autophagosome_organization_(GO:1905037)	3/200	0.0168163	0.21345	0.0869581	0.650941	-2.12775	8.69273	CG5174;CCT8;Usp5	GO_BP_autoRIF_predicted_zscore
regulation_of_transcription_elongation_from_RNA_polymerase_II_promoter_(GO:0034243)	3/200	0.0168163	0.21345	0.0869581	0.650941	-2.11306	8.63271	CG3918;CG1677;tgo	GO_BP_autoRIF_predicted_zscore
cold_acclimation_(GO:0009631)	3/200	0.0168163	0.21345	0.0869581	0.650941	-2.09192	8.54635	klar;rols;LamC	GO_BP_autoRIF_predicted_zscore
inner_dynein_arm_assembly_(GO:0036159)	3/200	0.0168163	0.21345	0.0869581	0.650941	-2.03686	8.32141	klar;rols;tinc	GO_BP_autoRIF_predicted_zscore
carboxylic_acid_biosynthetic_process_(GO:0046394)	3/200	0.0168163	0.21345	0.0869581	0.650941	-2.01676	8.23929	klar;rols;Drak	GO_BP_autoRIF_predicted_zscore
histone_lysine_demethylation_(GO:0070076)	3/200	0.0168163	0.21345	0.0869581	0.650941	-2.01307	8.2242	CG3918;CG1677;tgo	GO_BP_autoRIF_predicted_zscore
RNA_polyadenylation_(GO:0043631)	3/200	0.0168163	0.21345	0.0869581	0.650941	-1.99287	8.14169	CG3918;CG1677;tgo	GO_BP_autoRIF_predicted_zscore
anion_transmembrane_transport_(GO:0098656)	3/200	0.0168163	0.21345	0.0869581	0.650941	-1.97574	8.0717	Sep4;SK;tinc	GO_BP_autoRIF_predicted_zscore
ribosome_disassembly_(GO:0032790)	3/200	0.0168163	0.21345	0.0869581	0.650941	-1.95926	8.00437	klar;rols;CCT8	GO_BP_autoRIF_predicted_zscore
azole_transport_(GO:0045117)	3/200	0.0168163	0.21345	0.0869581	0.650941	-1.95214	7.9753	NaPi-III;Sep4;tinc	GO_BP_autoRIF_predicted_zscore
transcription_elongation_from_RNA_polymerase_II_promoter_(GO:0006368)	3/200	0.0168163	0.21345	0.0869581	0.650941	-1.92753	7.87473	CG3918;CG1677;tgo	GO_BP_autoRIF_predicted_zscore
transcription_initiation_from_RNA_polymerase_II_promoter_(GO:0006367)	3/200	0.0168163	0.21345	0.0869581	0.650941	-1.91288	7.81488	CG3918;CG1677;tgo	GO_BP_autoRIF_predicted_zscore
histone_modification_(GO:0016570)	3/200	0.0168163	0.21345	0.0869581	0.650941	-1.86879	7.63479	CG3918;CG1677;tgo	GO_BP_autoRIF_predicted_zscore
histone_H3-K9_methylation_(GO:0051567)	3/200	0.0168163	0.21345	0.0869581	0.650941	-1.83311	7.48901	CG3918;CG1677;tgo	GO_BP_autoRIF_predicted_zscore
negative_regulation_of_histone_modification_(GO:0031057)	3/200	0.0168163	0.21345	0.0869581	0.650941	-1.82663	7.46254	CG3918;CG1677;tgo	GO_BP_autoRIF_predicted_zscore
regulation_of_histone_modification_(GO:0031056)	3/200	0.0168163	0.21345	0.0869581	0.650941	-1.8254	7.4575	CG3918;CG1677;tgo	GO_BP_autoRIF_predicted_zscore
mRNA_export_from_nucleus_(GO:0006406)	3/200	0.0168163	0.21345	0.0869581	0.650941	-1.82166	7.44222	CG3918;CG1677;tgo	GO_BP_autoRIF_predicted_zscore
histone_methylation_(GO:0016571)	3/200	0.0168163	0.21345	0.0869581	0.650941	-1.80573	7.37713	CG2926;CG1677;tgo	GO_BP_autoRIF_predicted_zscore
somatic_muscle_development_(GO:0007525)	3/200	0.0168163	0.21345	0.0869581	0.650941	-1.79945	7.35148	klar;rols;tgo	GO_BP_autoRIF_predicted_zscore
cellular_macromolecule_biosynthetic_process_(GO:0034645)	3/200	0.0168163	0.21345	0.0869581	0.650941	-1.77896	7.26776	Tm1;CG18304;CG4945	GO_BP_autoRIF_predicted_zscore
stem_cell_differentiation_(GO:0048863)	3/193	0.0153034	0.21345	0.0801718	0.650941	-1.7322	7.24003	CG3918;CG11180;tgo	GO_BP_autoRIF_predicted_zscore
cellular_macromolecule_catabolic_process_(GO:0044265)	3/200	0.0168163	0.21345	0.0869581	0.650941	-1.76791	7.22264	Tm1;CG18304;CG4945	GO_BP_autoRIF_predicted_zscore
retinal_ganglion_cell_axon_guidance_(GO:0031290)	3/200	0.0168163	0.21345	0.0869581	0.650941	-1.74798	7.14122	rols;salr;tinc	GO_BP_autoRIF_predicted_zscore
spermine_catabolic_process_(GO:0046208)	3/200	0.0168163	0.21345	0.0869581	0.650941	-1.74299	7.12083	CG3918;CG11180;CG1677	GO_BP_autoRIF_predicted_zscore
spermine_metabolic_process_(GO:0008215)	3/200	0.0168163	0.21345	0.0869581	0.650941	-1.74148	7.11466	CG3918;CG11180;CG1677	GO_BP_autoRIF_predicted_zscore
sensory_neuron_axon_guidance_(GO:0097374)	3/200	0.0168163	0.21345	0.0869581	0.650941	-1.73876	7.10353	klar;rols;tinc	GO_BP_autoRIF_predicted_zscore
acetyl-CoA_metabolic_process_(GO:0006084)	3/200	0.0168163	0.21345	0.0869581	0.650941	-1.73769	7.09918	klar;CG7546;Drak	GO_BP_autoRIF_predicted_zscore
regulation_of_histone_acetylation_(GO:0035065)	3/200	0.0168163	0.21345	0.0869581	0.650941	-1.72425	7.04425	CG3918;CG1677;tgo	GO_BP_autoRIF_predicted_zscore
regulation_of_blood_circulation_(GO:1903522)	3/200	0.0168163	0.21345	0.0869581	0.650941	-1.71322	6.99922	CG3918;CG11180;tgo	GO_BP_autoRIF_predicted_zscore
regulation_of_chromatin_silencing_(GO:0031935)	3/200	0.0168163	0.21345	0.0869581	0.650941	-1.71125	6.99118	CG3918;CG1677;tgo	GO_BP_autoRIF_predicted_zscore
instar_larval_or_pupal_morphogenesis_(GO:0048707)	3/200	0.0168163	0.21345	0.0869581	0.650941	-1.70757	6.97614	klar;rols;tinc	GO_BP_autoRIF_predicted_zscore
purine_nucleobase_metabolic_process_(GO:0006144)	3/200	0.0168163	0.21345	0.0869581	0.650941	-1.69353	6.91877	klar;rols;CCT8	GO_BP_autoRIF_predicted_zscore
respiratory_system_development_(GO:0060541)	3/200	0.0168163	0.21345	0.0869581	0.650941	-1.68827	6.89727	klar;rols;tinc	GO_BP_autoRIF_predicted_zscore
purine_nucleobase_catabolic_process_(GO:0006145)	3/200	0.0168163	0.21345	0.0869581	0.650941	-1.67161	6.82921	klar;rols;CCT8	GO_BP_autoRIF_predicted_zscore
aromatic_compound_biosynthetic_process_(GO:0019438)	3/200	0.0168163	0.21345	0.0869581	0.650941	-1.66827	6.81557	klar;rols;CCT8	GO_BP_autoRIF_predicted_zscore
visual_perception_(GO:0007601)	3/200	0.0168163	0.21345	0.0869581	0.650941	-1.66742	6.8121	rols;salr;tinc	GO_BP_autoRIF_predicted_zscore
regulation_of_RNA_metabolic_process_(GO:0051252)	3/200	0.0168163	0.21345	0.0869581	0.650941	-1.64947	6.73878	CG3918;CG1677;tgo	GO_BP_autoRIF_predicted_zscore
negative_regulation_of_peptidoglycan_recognition_protein_signaling_pathway_(GO:0061060)	3/200	0.0168163	0.21345	0.0869581	0.650941	-1.64286	6.71176	klar;rols;CG7142	GO_BP_autoRIF_predicted_zscore
neuron_cell-cell_adhesion_(GO:0007158)	3/200	0.0168163	0.21345	0.0869581	0.650941	-1.62851	6.65312	klar;rols;tinc	GO_BP_autoRIF_predicted_zscore
haltere_disc_development_(GO:0035216)	3/200	0.0168163	0.21345	0.0869581	0.650941	-1.62576	6.64188	rols;salr;tinc	GO_BP_autoRIF_predicted_zscore
protein-DNA_complex_assembly_(GO:0065004)	3/200	0.0168163	0.21345	0.0869581	0.650941	-1.61518	6.59868	CG3918;CG1677;tgo	GO_BP_autoRIF_predicted_zscore
ion_transmembrane_transport_(GO:0034220)	3/200	0.0168163	0.21345	0.0869581	0.650941	-1.59635	6.52173	Sep4;pigs;tinc	GO_BP_autoRIF_predicted_zscore
negative_regulation_of_RNA_splicing_(GO:0033119)	3/200	0.0168163	0.21345	0.0869581	0.650941	-1.5922	6.50479	CG3918;CG11180;tgo	GO_BP_autoRIF_predicted_zscore
regulation_of_muscle_contraction_(GO:0006937)	3/200	0.0168163	0.21345	0.0869581	0.650941	-1.55565	6.35548	klar;rols;tinc	GO_BP_autoRIF_predicted_zscore
negative_regulation_of_hemocyte_proliferation_(GO:0035207)	3/200	0.0168163	0.21345	0.0869581	0.650941	-1.54847	6.32615	CG3918;CG11180;tgo	GO_BP_autoRIF_predicted_zscore
positive_regulation_of_phosphorylation_of_RNA_polymerase_II_C-terminal_domain_(GO:1901409)	3/200	0.0168163	0.21345	0.0869581	0.650941	-1.5194	6.20735	CG3918;CG1677;tgo	GO_BP_autoRIF_predicted_zscore
nicotinamide_nucleotide_metabolic_process_(GO:0046496)	3/200	0.0168163	0.21345	0.0869581	0.650941	-1.51847	6.20358	klar;rols;CCT8	GO_BP_autoRIF_predicted_zscore
negative_regulation_of_cell_cycle_process_(GO:0010948)	3/180	0.0127076	0.21345	0.0682302	0.650941	-1.40606	6.13823	CG3918;CG11180;tgo	GO_BP_autoRIF_predicted_zscore
mRNA_polyadenylation_(GO:0006378)	3/200	0.0168163	0.21345	0.0869581	0.650941	-1.50211	6.13675	CG3918;CG1677;tgo	GO_BP_autoRIF_predicted_zscore
positive_regulation_of_antibacterial_peptide_biosynthetic_process_(GO:0006963)	3/200	0.0168163	0.21345	0.0869581	0.650941	-1.50148	6.13414	rols;CG12384;LamC	GO_BP_autoRIF_predicted_zscore
polytene_chromosome_puffing_(GO:0035079)	3/200	0.0168163	0.21345	0.0869581	0.650941	-1.47804	6.03842	klar;CG1677;tgo	GO_BP_autoRIF_predicted_zscore
positive_regulation_of_nurse_cell_apoptotic_process_(GO:0045850)	3/200	0.0168163	0.21345	0.0869581	0.650941	-1.4737	6.02068	Fis1;Flo1;CG15387	GO_BP_autoRIF_predicted_zscore
negative_regulation_of_lipid_storage_(GO:0010888)	3/200	0.0168163	0.21345	0.0869581	0.650941	-1.47316	6.01848	CG2926;l(3)05822;CkIIalpha	GO_BP_autoRIF_predicted_zscore
maintenance_of_synapse_structure_(GO:0099558)	3/200	0.0168163	0.21345	0.0869581	0.650941	-1.46767	5.99602	Sep4;SK;tinc	GO_BP_autoRIF_predicted_zscore
positive_regulation_of_dendrite_development_(GO:1900006)	3/200	0.0168163	0.21345	0.0869581	0.650941	-1.45726	5.9535	klar;rols;tinc	GO_BP_autoRIF_predicted_zscore
regulation_of_histone_H3-K4_methylation_(GO:0051569)	3/200	0.0168163	0.21345	0.0869581	0.650941	-1.45702	5.9525	CG2926;CG1677;tgo	GO_BP_autoRIF_predicted_zscore
gonadal_mesoderm_development_(GO:0007506)	3/200	0.0168163	0.21345	0.0869581	0.650941	-1.44527	5.90453	klar;rols;tgo	GO_BP_autoRIF_predicted_zscore
cholesterol_homeostasis_(GO:0042632)	3/200	0.0168163	0.21345	0.0869581	0.650941	-1.43036	5.8436	klar;Drak;CG2926	GO_BP_autoRIF_predicted_zscore
negative_regulation_of_female_receptivity_(GO:0007621)	3/200	0.0168163	0.21345	0.0869581	0.650941	-1.42877	5.83709	klar;Sep4;Drak	GO_BP_autoRIF_predicted_zscore
pseudouridine_synthesis_(GO:0001522)	3/200	0.0168163	0.21345	0.0869581	0.650941	-1.42845	5.83581	CG3918;CG11180;CG1677	GO_BP_autoRIF_predicted_zscore
protein_acetylation_(GO:0006473)	3/200	0.0168163	0.21345	0.0869581	0.650941	-1.4274	5.8315	CG3918;CG1677;tgo	GO_BP_autoRIF_predicted_zscore
mucosal_immune_response_(GO:0002385)	3/200	0.0168163	0.21345	0.0869581	0.650941	-1.42659	5.82822	klar;rols;Drak	GO_BP_autoRIF_predicted_zscore
neuron_remodeling_(GO:0016322)	3/200	0.0168163	0.21345	0.0869581	0.650941	-1.41412	5.77726	Sep4;SK;tinc	GO_BP_autoRIF_predicted_zscore
regulation_of_postsynaptic_membrane_potential_(GO:0060078)	3/200	0.0168163	0.21345	0.0869581	0.650941	-1.41013	5.76095	Sep4;SK;tinc	GO_BP_autoRIF_predicted_zscore
positive_regulation_of_mitotic_cell_cycle_(GO:0045931)	3/200	0.0168163	0.21345	0.0869581	0.650941	-1.34615	5.49957	CG3918;CG1677;tgo	GO_BP_autoRIF_predicted_zscore
positive_regulation_of_transcription_initiation_from_RNA_polymerase_II_promoter_(GO:0060261)	3/200	0.0168163	0.21345	0.0869581	0.650941	-1.33925	5.47139	klar;CG2926;CG1677	GO_BP_autoRIF_predicted_zscore
renal_tubular_secretion_(GO:0097254)	3/200	0.0168163	0.21345	0.0869581	0.650941	-1.32296	5.40482	CG2926;CG1677;l(3)05822	GO_BP_autoRIF_predicted_zscore
positive_regulation_of_circadian_rhythm_(GO:0042753)	3/200	0.0168163	0.21345	0.0869581	0.650941	-1.32202	5.40097	CG32486;Sep4;SK	GO_BP_autoRIF_predicted_zscore
regulation_of_oskar_mRNA_translation_(GO:0046011)	3/200	0.0168163	0.21345	0.0869581	0.650941	-1.31137	5.35746	CG2926;CG1677;l(3)05822	GO_BP_autoRIF_predicted_zscore
gluconeogenesis_(GO:0006094)	3/200	0.0168163	0.21345	0.0869581	0.650941	-1.27407	5.20512	klar;Drak;l(3)05822	GO_BP_autoRIF_predicted_zscore
stress-activated_MAPK_cascade_(GO:0051403)	3/200	0.0168163	0.21345	0.0869581	0.650941	-1.26429	5.16513	CG2926;CG1677;l(3)05822	GO_BP_autoRIF_predicted_zscore
positive_regulation_of_Wnt_signaling_pathway_(GO:0030177)	3/200	0.0168163	0.21345	0.0869581	0.650941	-1.25351	5.12111	CG2926;CG1677;tgo	GO_BP_autoRIF_predicted_zscore
positive_regulation_of_transcription_from_RNA_polymerase_II_promoter_(GO:0045944)	3/200	0.0168163	0.21345	0.0869581	0.650941	-1.25237	5.11646	CG2926;CG1677;tgo	GO_BP_autoRIF_predicted_zscore
positive_regulation_of_transcription_elongation_from_RNA_polymerase_II_promoter_(GO:0032968)	3/200	0.0168163	0.21345	0.0869581	0.650941	-1.19025	4.86267	CG2926;CG1677;l(3)05822	GO_BP_autoRIF_predicted_zscore
transmembrane transport (GO:0055085)	1/75	0.183845	0.216772	0.28717	0.345478	-1.22103	2.06802	CG4822	GO_BP_2018
positive regulation of transcription, DNA-templated (GO:0045893)	1/41	0.105026	0.217106	0.183297	0.516199	-1.32659	2.98954	tgo	GO_BP_coexpression_predicted
regulation of protein ubiquitination involved in ubiquitin-dependent protein catabolic process (GO:2000058)	1/41	0.105026	0.217106	0.183297	0.516199	-1.29237	2.91241	tgo	GO_BP_coexpression_predicted
mitotic sister chromatid segregation (GO:0000070)	1/76	0.186056	0.218294	0.290353	0.347544	-1.09011	1.83324	sls	GO_BP_2018
cilium organization (GO:0044782)	1/77	0.188262	0.219794	0.293523	0.348191	-1.12552	1.87953	Sep4	GO_BP_2018
compound eye photoreceptor development (GO:0042051)	1/78	0.190463	0.221273	0.296679	0.349042	-1.11349	1.84649	klar	GO_BP_2018
activation of protein kinase activity (GO:0032147)	1/42	0.107448	0.221698	0.187237	0.516199	-1.32417	2.9539	CG2926	GO_BP_coexpression_predicted
cilium assembly (GO:0060271)	1/79	0.192657	0.22273	0.299821	0.349042	-1.03157	1.69883	Sep4	GO_BP_2018
cellular response to starvation (GO:0009267)	1/80	0.194845	0.224167	0.30295	0.350239	-1.06039	1.73431	CG12384	GO_BP_2018
positive regulation of transcription from RNA polymerase II promoter (GO:0045944)	2/305	0.199084	0.227936	0.396257	0.432778	-0.758008	1.22345	CG3630;tgo	GO_BP_2018
chaeta development (GO:0022416)	1/85	0.205701	0.232148	0.31839	0.362781	-1.0786	1.70562	CkIIalpha	GO_BP_2018
somatic muscle development (GO:0007525)	1/85	0.205701	0.232148	0.31839	0.362781	-1.02366	1.61875	sls	GO_BP_2018
epithelium development (GO:0060429)	1/85	0.205701	0.232148	0.31839	0.362781	-0.883129	1.39652	Drak	GO_BP_2018
plasma membrane bounded cell projection assembly (GO:0120031)	1/86	0.207855	0.233467	0.321438	0.364501	-1.1116	1.74623	Sep4	GO_BP_2018
regulation of alternative mRNA splicing, via spliceosome (GO:0000381)	1/88	0.212145	0.237162	0.327494	0.3696	-1.04197	1.61557	CG2926	GO_BP_2018
negative regulation of transcription, DNA-templated (GO:0045892)	1/47	0.119458	0.246022	0.206659	0.516199	-1.12926	2.39944	tgo	GO_BP_coexpression_predicted
transmembrane receptor protein tyrosine kinase signaling pathway (GO:0007169)	1/93	0.222771	0.246714	0.342406	0.380987	-1.22718	1.84274	tgo	GO_BP_2018
regulation of mRNA splicing, via spliceosome (GO:0048024)	1/93	0.222771	0.246714	0.342406	0.380987	-1.01708	1.52726	CG2926	GO_BP_2018
proteasomal protein catabolic process (GO:0010498)	1/94	0.22488	0.24789	0.345349	0.382466	-1.07692	1.60697	Usp5	GO_BP_2018
regulation of MAPK cascade (GO:0043408)	1/49	0.124218	0.254877	0.214301	0.516199	-1.34781	2.81115	tgo	GO_BP_coexpression_predicted
negative regulation of transcription from RNA polymerase II promoter (GO:0000122)	1/49	0.124218	0.254877	0.214301	0.516199	-1.12287	2.34199	tgo	GO_BP_coexpression_predicted
regulation of transcription from RNA polymerase II promoter (GO:0006357)	3/630	0.241621	0.265112	0.538865	0.548116	-0.591537	0.84021	CG3630;salr;tgo	GO_BP_2018
regulation of cell growth (GO:0001558)	1/52	0.131311	0.268436	0.22563	0.516199	-1.16052	2.35608	CG2926	GO_BP_coexpression_predicted
negative regulation of cellular macromolecule biosynthetic process (GO:2000113)	1/52	0.131311	0.268436	0.22563	0.516199	-1.03396	2.09913	tgo	GO_BP_coexpression_predicted
mitochondrion organization (GO:0007005)	1/106	0.249746	0.272764	0.379689	0.418541	-0.864579	1.19944	Fis1	GO_BP_2018
positive regulation of signal transduction (GO:0009967)	1/107	0.251782	0.273726	0.38247	0.419655	-1.07839	1.48731	CkIIalpha	GO_BP_2018
eye morphogenesis (GO:0048592)	1/114	0.265886	0.28774	0.401603	0.436605	-1.2604	1.66964	klar	GO_BP_2018
regulation of Notch signaling pathway (GO:0008593)	1/117	0.271851	0.292858	0.409626	0.443293	-0.978479	1.27447	pigs	GO_BP_2018
border follicle cell migration (GO:0007298)	1/121	0.27973	0.299982	0.42016	0.452626	-0.853331	1.08709	rols	GO_BP_2018
male gamete generation (GO:0048232)	1/124	0.285584	0.30488	0.42794	0.458922	-1.21643	1.52446	Imp	GO_BP_2018
regulation of antimicrobial peptide biosynthetic process (GO:0002805)	1/60	0.149949	0.305974	0.25507	0.520474	-1.20431	2.28513	CG2926	GO_BP_coexpression_predicted
DNA metabolic process (GO:0006259)	1/128	0.293316	0.311731	0.438156	0.467762	-0.907255	1.11275	pho	GO_BP_2018
ATP-dependent_chromatin_remodeling_(GO:0043044)	2/200	0.101634	0.312456	0.280455	0.650941	-2.80016	6.40224	CG3918;tgo	GO_BP_autoRIF_predicted_zscore
DNA_metabolic_process_(GO:0006259)	2/200	0.101634	0.312456	0.280455	0.650941	-2.49124	5.69593	CG3918;tgo	GO_BP_autoRIF_predicted_zscore
DNA_catabolic_process_(GO:0006308)	2/200	0.101634	0.312456	0.280455	0.650941	-2.44026	5.57937	CG3918;tgo	GO_BP_autoRIF_predicted_zscore
mRNA_export_from_nucleus_in_response_to_heat_stress_(GO:0031990)	2/200	0.101634	0.312456	0.280455	0.650941	-2.21691	5.06871	CG3918;tgo	GO_BP_autoRIF_predicted_zscore
cellular_potassium_ion_homeostasis_(GO:0030007)	2/200	0.101634	0.312456	0.280455	0.650941	-2.1729	4.96807	klar;rols	GO_BP_autoRIF_predicted_zscore
protein_targeting_to_peroxisome_(GO:0006625)	2/100	0.0299261	0.312456	0.0972766	0.650941	-1.41127	4.95219	CG5174;CkIIalpha	GO_BP_autoRIF_predicted_zscore
cell-matrix_adhesion_(GO:0007160)	2/200	0.101634	0.312456	0.280455	0.650941	-2.15885	4.93595	klar;rols	GO_BP_autoRIF_predicted_zscore
Cajal_body_organization_(GO:0030576)	2/200	0.101634	0.312456	0.280455	0.650941	-2.09925	4.79968	CG3918;CG11180	GO_BP_autoRIF_predicted_zscore
antennal_development_(GO:0007469)	2/200	0.101634	0.312456	0.280455	0.650941	-2.08488	4.76684	tinc;tgo	GO_BP_autoRIF_predicted_zscore
cellular_amide_metabolic_process_(GO:0043603)	2/200	0.101634	0.312456	0.280455	0.650941	-2.07968	4.75495	klar;pigs	GO_BP_autoRIF_predicted_zscore
Bolwig's_organ_development_(GO:0055034)	2/200	0.101634	0.312456	0.280455	0.650941	-2.05044	4.68809	rols;tinc	GO_BP_autoRIF_predicted_zscore
response_to_metal_ion_(GO:0010038)	2/148	0.060624	0.312456	0.181338	0.650941	-1.66347	4.66282	klar;rols	GO_BP_autoRIF_predicted_zscore
activation_of_MAPK_activity_(GO:0000187)	2/200	0.101634	0.312456	0.280455	0.650941	-2.03469	4.65208	CG2926;tgo	GO_BP_autoRIF_predicted_zscore
cytoplasmic_translational_initiation_(GO:0002183)	2/200	0.101634	0.312456	0.280455	0.650941	-2.02604	4.6323	CG3918;tgo	GO_BP_autoRIF_predicted_zscore
axon_guidance_(GO:0007411)	2/200	0.101634	0.312456	0.280455	0.650941	-1.99428	4.55969	klar;tinc	GO_BP_autoRIF_predicted_zscore
histone_H4_acetylation_(GO:0043967)	2/200	0.101634	0.312456	0.280455	0.650941	-1.99039	4.55079	CG3918;tgo	GO_BP_autoRIF_predicted_zscore
Malpighian_tubule_tip_cell_differentiation_(GO:0061382)	2/200	0.101634	0.312456	0.280455	0.650941	-1.94135	4.43867	klar;rols	GO_BP_autoRIF_predicted_zscore
ecdysone_receptor-mediated_signaling_pathway_(GO:0035076)	2/200	0.101634	0.312456	0.280455	0.650941	-1.9203	4.39054	rols;Flo1	GO_BP_autoRIF_predicted_zscore
negative_regulation_of_defense_response_(GO:0031348)	2/131	0.0488384	0.312456	0.150253	0.650941	-1.45379	4.38933	klar;rols	GO_BP_autoRIF_predicted_zscore
histone_ubiquitination_(GO:0016574)	2/200	0.101634	0.312456	0.280455	0.650941	-1.91124	4.36982	CG3918;tgo	GO_BP_autoRIF_predicted_zscore
G2/M_transition_of_mitotic_cell_cycle_(GO:0000086)	2/200	0.101634	0.312456	0.280455	0.650941	-1.90923	4.36523	CG3918;CG11180	GO_BP_autoRIF_predicted_zscore
cellular_response_to_amino_acid_stimulus_(GO:0071230)	2/200	0.101634	0.312456	0.280455	0.650941	-1.89943	4.34282	rols;tinc	GO_BP_autoRIF_predicted_zscore
negative_regulation_of_axon_guidance_(GO:1902668)	2/200	0.101634	0.312456	0.280455	0.650941	-1.88743	4.3154	CG3918;tgo	GO_BP_autoRIF_predicted_zscore
regulation_of_nucleocytoplasmic_transport_(GO:0046822)	2/193	0.0957398	0.312456	0.266975	0.650941	-1.80977	4.24594	CG3918;tgo	GO_BP_autoRIF_predicted_zscore
Bolwig's_organ_morphogenesis_(GO:0001746)	2/200	0.101634	0.312456	0.280455	0.650941	-1.85512	4.24152	rols;tinc	GO_BP_autoRIF_predicted_zscore
N-terminal_protein_amino_acid_acetylation_(GO:0006474)	2/200	0.101634	0.312456	0.280455	0.650941	-1.84279	4.21333	CG3918;tgo	GO_BP_autoRIF_predicted_zscore
digestive_tract_morphogenesis_(GO:0048546)	2/200	0.101634	0.312456	0.280455	0.650941	-1.84129	4.20989	klar;tgo	GO_BP_autoRIF_predicted_zscore
asymmetric_stem_cell_division_(GO:0098722)	2/200	0.101634	0.312456	0.280455	0.650941	-1.83055	4.18533	CG1677;tgo	GO_BP_autoRIF_predicted_zscore
exosomal_secretion_(GO:1990182)	2/200	0.101634	0.312456	0.280455	0.650941	-1.80952	4.13726	CG1677;tgo	GO_BP_autoRIF_predicted_zscore
extracellular_matrix_assembly_(GO:0085029)	2/200	0.101634	0.312456	0.280455	0.650941	-1.79875	4.11263	klar;rols	GO_BP_autoRIF_predicted_zscore
body_fluid_secretion_(GO:0007589)	2/200	0.101634	0.312456	0.280455	0.650941	-1.78799	4.08803	klar;rols	GO_BP_autoRIF_predicted_zscore
endoderm_development_(GO:0007492)	2/200	0.101634	0.312456	0.280455	0.650941	-1.78696	4.08567	rols;tgo	GO_BP_autoRIF_predicted_zscore
branched-chain_amino_acid_metabolic_process_(GO:0009081)	2/200	0.101634	0.312456	0.280455	0.650941	-1.77539	4.05923	klar;tinc	GO_BP_autoRIF_predicted_zscore
positive_regulation_of_cell_size_(GO:0045793)	2/127	0.0462023	0.312456	0.143112	0.650941	-1.31678	4.04875	CG3918;tgo	GO_BP_autoRIF_predicted_zscore
apoptotic_mitochondrial_changes_(GO:0008637)	2/200	0.101634	0.312456	0.280455	0.650941	-1.77044	4.04791	klar;rols	GO_BP_autoRIF_predicted_zscore
epidermis_morphogenesis_(GO:0048730)	2/200	0.101634	0.312456	0.280455	0.650941	-1.76593	4.03758	klar;rols	GO_BP_autoRIF_predicted_zscore
histone_H3_acetylation_(GO:0043966)	2/200	0.101634	0.312456	0.280455	0.650941	-1.76572	4.03712	CG3918;tgo	GO_BP_autoRIF_predicted_zscore
branched-chain_amino_acid_catabolic_process_(GO:0009083)	2/200	0.101634	0.312456	0.280455	0.650941	-1.76458	4.0345	klar;tinc	GO_BP_autoRIF_predicted_zscore
circulatory_system_development_(GO:0072359)	2/200	0.101634	0.312456	0.280455	0.650941	-1.7545	4.01145	klar;rols	GO_BP_autoRIF_predicted_zscore
cardiac_muscle_tissue_development_(GO:0048738)	2/200	0.101634	0.312456	0.280455	0.650941	-1.74493	3.98957	klar;rols	GO_BP_autoRIF_predicted_zscore
adenylate_cyclase-activating_G-protein_coupled_receptor_signaling_pathway_(GO:0007189)	2/200	0.101634	0.312456	0.280455	0.650941	-1.72392	3.94153	Msp300;SK	GO_BP_autoRIF_predicted_zscore
histone_deacetylation_(GO:0016575)	2/200	0.101634	0.312456	0.280455	0.650941	-1.72291	3.93924	CG3918;tgo	GO_BP_autoRIF_predicted_zscore
blastoderm_segmentation_(GO:0007350)	2/200	0.101634	0.312456	0.280455	0.650941	-1.71696	3.92562	CG3918;tgo	GO_BP_autoRIF_predicted_zscore
adult_walking_behavior_(GO:0007628)	2/200	0.101634	0.312456	0.280455	0.650941	-1.71262	3.9157	Sep4;SK	GO_BP_autoRIF_predicted_zscore
epithelial_tube_formation_(GO:0072175)	2/200	0.101634	0.312456	0.280455	0.650941	-1.70878	3.90693	klar;rols	GO_BP_autoRIF_predicted_zscore
dorsal/ventral_pattern_formation_(GO:0009953)	2/200	0.101634	0.312456	0.280455	0.650941	-1.70814	3.90545	rols;tgo	GO_BP_autoRIF_predicted_zscore
branching_morphogenesis_of_an_epithelial_tube_(GO:0048754)	2/200	0.101634	0.312456	0.280455	0.650941	-1.69417	3.87353	rols;tgo	GO_BP_autoRIF_predicted_zscore
cell_morphogenesis_involved_in_differentiation_(GO:0000904)	2/200	0.101634	0.312456	0.280455	0.650941	-1.69402	3.87317	klar;rols	GO_BP_autoRIF_predicted_zscore
epithelial_tube_morphogenesis_(GO:0060562)	2/200	0.101634	0.312456	0.280455	0.650941	-1.69235	3.86936	klar;rols	GO_BP_autoRIF_predicted_zscore
epithelial_cell_migration_(GO:0010631)	2/200	0.101634	0.312456	0.280455	0.650941	-1.68104	3.8435	klar;rols	GO_BP_autoRIF_predicted_zscore
positive_regulation_of_oxidative_phosphorylation_(GO:1903862)	2/125	0.0449049	0.312456	0.13957	0.650941	-1.23312	3.82662	CG11180;l(3)05822	GO_BP_autoRIF_predicted_zscore
cell_fate_specification_involved_in_pattern_specification_(GO:0060573)	2/200	0.101634	0.312456	0.280455	0.650941	-1.67081	3.8201	klar;rols	GO_BP_autoRIF_predicted_zscore
border_follicle_cell_migration_(GO:0007298)	2/200	0.101634	0.312456	0.280455	0.650941	-1.67045	3.81928	klar;rols	GO_BP_autoRIF_predicted_zscore
compartment_pattern_specification_(GO:0007386)	2/200	0.101634	0.312456	0.280455	0.650941	-1.66971	3.8176	rols;salr	GO_BP_autoRIF_predicted_zscore
cellular_response_to_acid_chemical_(GO:0071229)	2/200	0.101634	0.312456	0.280455	0.650941	-1.65748	3.78963	rols;tinc	GO_BP_autoRIF_predicted_zscore
G1/S_transition_of_mitotic_cell_cycle_(GO:0000082)	2/200	0.101634	0.312456	0.280455	0.650941	-1.64728	3.76631	CG3918;CG11180	GO_BP_autoRIF_predicted_zscore
eye-antennal_disc_morphogenesis_(GO:0007455)	2/200	0.101634	0.312456	0.280455	0.650941	-1.64448	3.7599	rols;tinc	GO_BP_autoRIF_predicted_zscore
snRNA_transcription_(GO:0009301)	2/200	0.101634	0.312456	0.280455	0.650941	-1.64116	3.75231	CG3918;tgo	GO_BP_autoRIF_predicted_zscore
RNA_modification_(GO:0009451)	2/200	0.101634	0.312456	0.280455	0.650941	-1.62178	3.70801	CG3918;tgo	GO_BP_autoRIF_predicted_zscore
dorsal/ventral_axis_specification_(GO:0009950)	2/200	0.101634	0.312456	0.280455	0.650941	-1.62048	3.70503	rols;tgo	GO_BP_autoRIF_predicted_zscore
nuclear_body_organization_(GO:0030575)	2/200	0.101634	0.312456	0.280455	0.650941	-1.62021	3.70442	CG3918;tgo	GO_BP_autoRIF_predicted_zscore
mitochondrial_calcium_ion_homeostasis_(GO:0051560)	2/200	0.101634	0.312456	0.280455	0.650941	-1.59844	3.65464	klar;poe	GO_BP_autoRIF_predicted_zscore
Rho_protein_signal_transduction_(GO:0007266)	2/200	0.101634	0.312456	0.280455	0.650941	-1.59659	3.65041	klar;tgo	GO_BP_autoRIF_predicted_zscore
anesthesia-resistant_memory_(GO:0007615)	2/200	0.101634	0.312456	0.280455	0.650941	-1.59396	3.64441	Sep4;SK	GO_BP_autoRIF_predicted_zscore
apoptotic_nuclear_changes_(GO:0030262)	2/200	0.101634	0.312456	0.280455	0.650941	-1.5938	3.64405	klar;rols	GO_BP_autoRIF_predicted_zscore
dendrite_guidance_(GO:0070983)	2/200	0.101634	0.312456	0.280455	0.650941	-1.59295	3.64209	klar;tinc	GO_BP_autoRIF_predicted_zscore
negative_regulation_of_chromatin_silencing_(GO:0031936)	2/200	0.101634	0.312456	0.280455	0.650941	-1.59199	3.63991	CG3918;tgo	GO_BP_autoRIF_predicted_zscore
female_germ-line_sex_determination_(GO:0019099)	2/200	0.101634	0.312456	0.280455	0.650941	-1.58934	3.63384	CG3918;tgo	GO_BP_autoRIF_predicted_zscore
cAMP_biosynthetic_process_(GO:0006171)	2/200	0.101634	0.312456	0.280455	0.650941	-1.55695	3.55977	Sep4;SK	GO_BP_autoRIF_predicted_zscore
histone_demethylation_(GO:0016577)	2/200	0.101634	0.312456	0.280455	0.650941	-1.55683	3.5595	CG1677;tgo	GO_BP_autoRIF_predicted_zscore
actin_filament_bundle_organization_(GO:0061572)	2/200	0.101634	0.312456	0.280455	0.650941	-1.55001	3.54391	CG18304;sls	GO_BP_autoRIF_predicted_zscore
cAMP_metabolic_process_(GO:0046058)	2/200	0.101634	0.312456	0.280455	0.650941	-1.54575	3.53418	Sep4;SK	GO_BP_autoRIF_predicted_zscore
nucleosome_organization_(GO:0034728)	2/200	0.101634	0.312456	0.280455	0.650941	-1.53389	3.50705	CG3918;tgo	GO_BP_autoRIF_predicted_zscore
larval_heart_development_(GO:0007508)	2/200	0.101634	0.312456	0.280455	0.650941	-1.53188	3.50246	rols;tinc	GO_BP_autoRIF_predicted_zscore
ecdysteroid_biosynthetic_process_(GO:0045456)	2/200	0.101634	0.312456	0.280455	0.650941	-1.52908	3.49605	klar;rols	GO_BP_autoRIF_predicted_zscore
dicarboxylic_acid_transport_(GO:0006835)	2/200	0.101634	0.312456	0.280455	0.650941	-1.52436	3.48527	CG32486;Sep4	GO_BP_autoRIF_predicted_zscore
ecdysteroid_metabolic_process_(GO:0045455)	2/200	0.101634	0.312456	0.280455	0.650941	-1.52059	3.47664	klar;rols	GO_BP_autoRIF_predicted_zscore
imaginal_disc_eversion_(GO:0007561)	2/200	0.101634	0.312456	0.280455	0.650941	-1.51917	3.4734	klar;rols	GO_BP_autoRIF_predicted_zscore
adrenergic_receptor_signaling_pathway_(GO:0071875)	2/200	0.101634	0.312456	0.280455	0.650941	-1.51494	3.46372	Sep4;SK	GO_BP_autoRIF_predicted_zscore
glutamine_metabolic_process_(GO:0006541)	2/200	0.101634	0.312456	0.280455	0.650941	-1.51185	3.45667	CG1677;tgo	GO_BP_autoRIF_predicted_zscore
chemical_synaptic_transmission_(GO:0007268)	2/200	0.101634	0.312456	0.280455	0.650941	-1.50323	3.43696	Sep4;SK	GO_BP_autoRIF_predicted_zscore
cellular_calcium_ion_homeostasis_(GO:0006874)	2/200	0.101634	0.312456	0.280455	0.650941	-1.49616	3.42079	Sep4;SK	GO_BP_autoRIF_predicted_zscore
cellular_response_to_reactive_oxygen_species_(GO:0034614)	2/200	0.101634	0.312456	0.280455	0.650941	-1.4956	3.4195	klar;rols	GO_BP_autoRIF_predicted_zscore
associative_learning_(GO:0008306)	2/200	0.101634	0.312456	0.280455	0.650941	-1.49417	3.41624	Sep4;SK	GO_BP_autoRIF_predicted_zscore
ncRNA_catabolic_process_(GO:0034661)	2/175	0.0810807	0.312456	0.232386	0.650941	-1.35886	3.41387	CG3918;tgo	GO_BP_autoRIF_predicted_zscore
ncRNA_metabolic_process_(GO:0034660)	2/175	0.0810807	0.312456	0.232386	0.650941	-1.35852	3.41303	CG3918;tgo	GO_BP_autoRIF_predicted_zscore
action_potential_(GO:0001508)	2/200	0.101634	0.312456	0.280455	0.650941	-1.47805	3.37938	Sep4;tinc	GO_BP_autoRIF_predicted_zscore
regulation_of_transcription_from_RNA_polymerase_II_promoter_(GO:0006357)	2/200	0.101634	0.312456	0.280455	0.650941	-1.47329	3.36851	CG3918;tgo	GO_BP_autoRIF_predicted_zscore
epithelial_cell_differentiation_(GO:0030855)	2/200	0.101634	0.312456	0.280455	0.650941	-1.46901	3.35871	klar;tgo	GO_BP_autoRIF_predicted_zscore
extracellular_matrix_organization_(GO:0030198)	2/200	0.101634	0.312456	0.280455	0.650941	-1.46644	3.35284	klar;rols	GO_BP_autoRIF_predicted_zscore
peptidoglycan_recognition_protein_signaling_pathway_(GO:0061057)	2/200	0.101634	0.312456	0.280455	0.650941	-1.4664	3.35275	klar;rols	GO_BP_autoRIF_predicted_zscore
embryonic_development_via_the_syncytial_blastoderm_(GO:0001700)	2/200	0.101634	0.312456	0.280455	0.650941	-1.46358	3.3463	CG11180;CG1677	GO_BP_autoRIF_predicted_zscore
courtship_behavior_(GO:0007619)	2/200	0.101634	0.312456	0.280455	0.650941	-1.46331	3.34569	Sep4;SK	GO_BP_autoRIF_predicted_zscore
negative_regulation_of_cell_cycle_(GO:0045786)	2/200	0.101634	0.312456	0.280455	0.650941	-1.44684	3.30803	CG3918;tgo	GO_BP_autoRIF_predicted_zscore
cyclic_purine_nucleotide_metabolic_process_(GO:0052652)	2/200	0.101634	0.312456	0.280455	0.650941	-1.44391	3.30134	Sep4;SK	GO_BP_autoRIF_predicted_zscore
copulation_(GO:0007620)	2/200	0.101634	0.312456	0.280455	0.650941	-1.43863	3.28927	SK;tinc	GO_BP_autoRIF_predicted_zscore
cGMP_metabolic_process_(GO:0046068)	2/200	0.101634	0.312456	0.280455	0.650941	-1.43604	3.28333	SK;tinc	GO_BP_autoRIF_predicted_zscore
eye_pigment_metabolic_process_(GO:0042441)	2/200	0.101634	0.312456	0.280455	0.650941	-1.43593	3.28308	rols;tinc	GO_BP_autoRIF_predicted_zscore
eye_pigment_biosynthetic_process_(GO:0006726)	2/200	0.101634	0.312456	0.280455	0.650941	-1.43538	3.28183	rols;tinc	GO_BP_autoRIF_predicted_zscore
glutamine_family_amino_acid_metabolic_process_(GO:0009064)	2/200	0.101634	0.312456	0.280455	0.650941	-1.43297	3.27632	Sep4;tinc	GO_BP_autoRIF_predicted_zscore
glutamine_family_amino_acid_biosynthetic_process_(GO:0009084)	2/200	0.101634	0.312456	0.280455	0.650941	-1.43244	3.2751	Sep4;tinc	GO_BP_autoRIF_predicted_zscore
compound_eye_cone_cell_differentiation_(GO:0042675)	2/200	0.101634	0.312456	0.280455	0.650941	-1.43179	3.27362	rols;tinc	GO_BP_autoRIF_predicted_zscore
glutamine_family_amino_acid_catabolic_process_(GO:0009065)	2/200	0.101634	0.312456	0.280455	0.650941	-1.43075	3.27124	Sep4;tinc	GO_BP_autoRIF_predicted_zscore
cGMP_biosynthetic_process_(GO:0006182)	2/200	0.101634	0.312456	0.280455	0.650941	-1.42775	3.26437	SK;tinc	GO_BP_autoRIF_predicted_zscore
response_to_salt_stress_(GO:0009651)	2/200	0.101634	0.312456	0.280455	0.650941	-1.42539	3.25899	CG2926;l(3)05822	GO_BP_autoRIF_predicted_zscore
dosage_compensation_by_hyperactivation_of_X_chromosome_(GO:0009047)	2/200	0.101634	0.312456	0.280455	0.650941	-1.42174	3.25064	pho;tgo	GO_BP_autoRIF_predicted_zscore
polarized_epithelial_cell_differentiation_(GO:0030859)	2/200	0.101634	0.312456	0.280455	0.650941	-1.41912	3.24466	klar;rols	GO_BP_autoRIF_predicted_zscore
regulation_of_cell_cycle_(GO:0051726)	2/200	0.101634	0.312456	0.280455	0.650941	-1.41422	3.23344	CG3918;tgo	GO_BP_autoRIF_predicted_zscore
cellular_response_to_alcohol_(GO:0097306)	2/200	0.101634	0.312456	0.280455	0.650941	-1.41185	3.22803	Sep4;SK	GO_BP_autoRIF_predicted_zscore
regulation_of_transcription_initiation_from_RNA_polymerase_II_promoter_(GO:0060260)	2/200	0.101634	0.312456	0.280455	0.650941	-1.40634	3.21543	CG3918;tgo	GO_BP_autoRIF_predicted_zscore
fatty_acid_elongation_(GO:0030497)	2/200	0.101634	0.312456	0.280455	0.650941	-1.40396	3.20999	klar;CdGAPr	GO_BP_autoRIF_predicted_zscore
glucose_metabolic_process_(GO:0006006)	2/200	0.101634	0.312456	0.280455	0.650941	-1.40263	3.20695	klar;rols	GO_BP_autoRIF_predicted_zscore
chitin_biosynthetic_process_(GO:0006031)	2/200	0.101634	0.312456	0.280455	0.650941	-1.40206	3.20565	klar;rols	GO_BP_autoRIF_predicted_zscore
embryo_development_ending_in_birth_or_egg_hatching_(GO:0009792)	2/200	0.101634	0.312456	0.280455	0.650941	-1.40185	3.20517	klar;rols	GO_BP_autoRIF_predicted_zscore
neuron_migration_(GO:0001764)	2/200	0.101634	0.312456	0.280455	0.650941	-1.40002	3.20098	klar;tinc	GO_BP_autoRIF_predicted_zscore
chitin_catabolic_process_(GO:0006032)	2/200	0.101634	0.312456	0.280455	0.650941	-1.39708	3.19427	klar;rols	GO_BP_autoRIF_predicted_zscore
ganglion_mother_cell_fate_determination_(GO:0007402)	2/200	0.101634	0.312456	0.280455	0.650941	-1.39605	3.1919	CdGAPr;tgo	GO_BP_autoRIF_predicted_zscore
fatty_acid_elongation,_saturated_fatty_acid_(GO:0019367)	2/200	0.101634	0.312456	0.280455	0.650941	-1.3951	3.18973	klar;CdGAPr	GO_BP_autoRIF_predicted_zscore
nuclear_RNA_surveillance_(GO:0071027)	2/200	0.101634	0.312456	0.280455	0.650941	-1.39434	3.188	CG3918;CG11180	GO_BP_autoRIF_predicted_zscore
chitin_metabolic_process_(GO:0006030)	2/200	0.101634	0.312456	0.280455	0.650941	-1.39371	3.18655	klar;rols	GO_BP_autoRIF_predicted_zscore
motor_neuron_axon_guidance_(GO:0008045)	2/200	0.101634	0.312456	0.280455	0.650941	-1.39189	3.1824	klar;tinc	GO_BP_autoRIF_predicted_zscore
gliogenesis_(GO:0042063)	2/200	0.101634	0.312456	0.280455	0.650941	-1.38176	3.15923	rols;tinc	GO_BP_autoRIF_predicted_zscore
G-protein_coupled_glutamate_receptor_signaling_pathway_(GO:0007216)	2/200	0.101634	0.312456	0.280455	0.650941	-1.37994	3.15507	Sep4;SK	GO_BP_autoRIF_predicted_zscore
transcription_from_RNA_polymerase_I_promoter_(GO:0006360)	2/200	0.101634	0.312456	0.280455	0.650941	-1.37599	3.14604	CG3918;tgo	GO_BP_autoRIF_predicted_zscore
mitotic_G2/M_transition_checkpoint_(GO:0044818)	2/200	0.101634	0.312456	0.280455	0.650941	-1.3752	3.14423	CG10465;pho	GO_BP_autoRIF_predicted_zscore
R1/R6_cell_differentiation_(GO:0048052)	2/200	0.101634	0.312456	0.280455	0.650941	-1.37499	3.14375	klar;rols	GO_BP_autoRIF_predicted_zscore
cyclic_nucleotide_biosynthetic_process_(GO:0009190)	2/200	0.101634	0.312456	0.280455	0.650941	-1.37405	3.1416	Sep4;SK	GO_BP_autoRIF_predicted_zscore
regulation_of_DNA_metabolic_process_(GO:0051052)	2/189	0.0924187	0.312456	0.259273	0.650941	-1.31915	3.14146	CG3918;tgo	GO_BP_autoRIF_predicted_zscore
histone_deubiquitination_(GO:0016578)	2/200	0.101634	0.312456	0.280455	0.650941	-1.37142	3.1356	CG3918;tgo	GO_BP_autoRIF_predicted_zscore
cyclic_nucleotide_metabolic_process_(GO:0009187)	2/200	0.101634	0.312456	0.280455	0.650941	-1.37067	3.13387	Sep4;SK	GO_BP_autoRIF_predicted_zscore
germ-band_extension_(GO:0007377)	2/200	0.101634	0.312456	0.280455	0.650941	-1.37002	3.13239	CG3918;tgo	GO_BP_autoRIF_predicted_zscore
isoprenoid_metabolic_process_(GO:0006720)	2/200	0.101634	0.312456	0.280455	0.650941	-1.36551	3.12208	rols;tinc	GO_BP_autoRIF_predicted_zscore
flight_behavior_(GO:0007629)	2/200	0.101634	0.312456	0.280455	0.650941	-1.36477	3.12038	Sep4;SK	GO_BP_autoRIF_predicted_zscore
negative_regulation_of_neuroblast_proliferation_(GO:0007406)	2/200	0.101634	0.312456	0.280455	0.650941	-1.36182	3.11364	rols;tinc	GO_BP_autoRIF_predicted_zscore
S-adenosylhomocysteine_metabolic_process_(GO:0046498)	2/200	0.101634	0.312456	0.280455	0.650941	-1.36083	3.11137	CG3918;CG11180	GO_BP_autoRIF_predicted_zscore
isoprenoid_biosynthetic_process_(GO:0008299)	2/200	0.101634	0.312456	0.280455	0.650941	-1.3608	3.11131	rols;tinc	GO_BP_autoRIF_predicted_zscore
chloride_transport_(GO:0006821)	2/200	0.101634	0.312456	0.280455	0.650941	-1.36055	3.11073	Sep4;SK	GO_BP_autoRIF_predicted_zscore
muscle_fiber_development_(GO:0048747)	2/200	0.101634	0.312456	0.280455	0.650941	-1.34871	3.08368	rols;tinc	GO_BP_autoRIF_predicted_zscore
neuroblast_fate_commitment_(GO:0014017)	2/200	0.101634	0.312456	0.280455	0.650941	-1.34758	3.08108	klar;rols	GO_BP_autoRIF_predicted_zscore
establishment_of_body_hair_or_bristle_planar_orientation_(GO:0048104)	2/200	0.101634	0.312456	0.280455	0.650941	-1.34597	3.07741	klar;rols	GO_BP_autoRIF_predicted_zscore
lipoprotein_biosynthetic_process_(GO:0042158)	2/200	0.101634	0.312456	0.280455	0.650941	-1.34313	3.07091	klar;rols	GO_BP_autoRIF_predicted_zscore
negative_regulation_of_hemocyte_differentiation_(GO:0045611)	2/200	0.101634	0.312456	0.280455	0.650941	-1.34284	3.07024	CG3918;tgo	GO_BP_autoRIF_predicted_zscore
ring_gland_development_(GO:0035271)	2/198	0.0999393	0.312456	0.276604	0.650941	-1.33058	3.06457	klar;rols	GO_BP_autoRIF_predicted_zscore
tube_fusion_(GO:0035146)	2/200	0.101634	0.312456	0.280455	0.650941	-1.32426	3.02775	rols;tgo	GO_BP_autoRIF_predicted_zscore
superoxide_metabolic_process_(GO:0006801)	2/200	0.101634	0.312456	0.280455	0.650941	-1.32346	3.02594	rols;LamC	GO_BP_autoRIF_predicted_zscore
negative_regulation_of_protein_modification_by_small_protein_conjugation_or_removal_(GO:1903321)	2/200	0.101634	0.312456	0.280455	0.650941	-1.31989	3.01777	CdGAPr;CG31313	GO_BP_autoRIF_predicted_zscore
maintenance_of_presynaptic_active_zone_structure_(GO:0048790)	2/200	0.101634	0.312456	0.280455	0.650941	-1.31723	3.01169	Fis1;Sep4	GO_BP_autoRIF_predicted_zscore
negative_regulation_of_hemopoiesis_(GO:1903707)	2/200	0.101634	0.312456	0.280455	0.650941	-1.31032	2.9959	CG3918;tgo	GO_BP_autoRIF_predicted_zscore
Malpighian_tubule_morphogenesis_(GO:0007443)	2/200	0.101634	0.312456	0.280455	0.650941	-1.3088	2.99241	rols;tgo	GO_BP_autoRIF_predicted_zscore
glandular_epithelial_cell_differentiation_(GO:0002067)	2/200	0.101634	0.312456	0.280455	0.650941	-1.30495	2.98362	klar;tgo	GO_BP_autoRIF_predicted_zscore
regulation_of_chromatin_organization_(GO:1902275)	2/200	0.101634	0.312456	0.280455	0.650941	-1.30195	2.97676	CG3918;tgo	GO_BP_autoRIF_predicted_zscore
membrane_lipid_metabolic_process_(GO:0006643)	2/200	0.101634	0.312456	0.280455	0.650941	-1.28575	2.93971	klar;tgo	GO_BP_autoRIF_predicted_zscore
membrane_lipid_biosynthetic_process_(GO:0046467)	2/200	0.101634	0.312456	0.280455	0.650941	-1.2803	2.92726	klar;tgo	GO_BP_autoRIF_predicted_zscore
neural_crest_cell_migration_(GO:0001755)	2/200	0.101634	0.312456	0.280455	0.650941	-1.27722	2.92022	klar;rols	GO_BP_autoRIF_predicted_zscore
regulation_of_heterochromatin_assembly_(GO:0031445)	2/200	0.101634	0.312456	0.280455	0.650941	-1.27573	2.91681	CG3918;tgo	GO_BP_autoRIF_predicted_zscore
positive_regulation_of_axonogenesis_(GO:0050772)	2/200	0.101634	0.312456	0.280455	0.650941	-1.26524	2.89282	rols;tinc	GO_BP_autoRIF_predicted_zscore
response_to_alcohol_(GO:0097305)	2/200	0.101634	0.312456	0.280455	0.650941	-1.26303	2.88776	Sep4;SK	GO_BP_autoRIF_predicted_zscore
positive_regulation_of_cellular_protein_localization_(GO:1903829)	2/200	0.101634	0.312456	0.280455	0.650941	-1.26221	2.88589	CG3918;tgo	GO_BP_autoRIF_predicted_zscore
regulation_of_histone_H3-K27_methylation_(GO:0061085)	2/200	0.101634	0.312456	0.280455	0.650941	-1.26024	2.8814	CG3918;tgo	GO_BP_autoRIF_predicted_zscore
glutamate_receptor_signaling_pathway_(GO:0007215)	2/200	0.101634	0.312456	0.280455	0.650941	-1.2577	2.87558	Sep4;SK	GO_BP_autoRIF_predicted_zscore
negative_regulation_of_gene_silencing_by_RNA_(GO:0060967)	2/200	0.101634	0.312456	0.280455	0.650941	-1.25519	2.86983	CG2926;tgo	GO_BP_autoRIF_predicted_zscore
neuroblast_differentiation_(GO:0014016)	2/200	0.101634	0.312456	0.280455	0.650941	-1.25426	2.86771	CG3918;tgo	GO_BP_autoRIF_predicted_zscore
cellular_response_to_superoxide_(GO:0071451)	2/189	0.0924187	0.312456	0.259273	0.650941	-1.20003	2.85779	klar;CCT8	GO_BP_autoRIF_predicted_zscore
peptidyl-diphthamide_biosynthetic_process_from_peptidyl-histidine_(GO:0017183)	2/200	0.101634	0.312456	0.280455	0.650941	-1.24626	2.84942	klar;rols	GO_BP_autoRIF_predicted_zscore
nucleocytoplasmic_transport_(GO:0006913)	2/200	0.101634	0.312456	0.280455	0.650941	-1.24378	2.84375	CG3918;tgo	GO_BP_autoRIF_predicted_zscore
morphogenesis_of_an_epithelium_(GO:0002009)	2/200	0.101634	0.312456	0.280455	0.650941	-1.2428	2.84151	klar;rols	GO_BP_autoRIF_predicted_zscore
negative_regulation_of_mitotic_cell_cycle_phase_transition_(GO:1901991)	2/200	0.101634	0.312456	0.280455	0.650941	-1.24151	2.83857	CG3918;CG11180	GO_BP_autoRIF_predicted_zscore
larval_visceral_muscle_development_(GO:0007523)	2/200	0.101634	0.312456	0.280455	0.650941	-1.23374	2.82079	rols;LamC	GO_BP_autoRIF_predicted_zscore
transcription_from_RNA_polymerase_II_promoter_(GO:0006366)	2/200	0.101634	0.312456	0.280455	0.650941	-1.22766	2.8069	CG3918;tgo	GO_BP_autoRIF_predicted_zscore
histone_H3-K4_methylation_(GO:0051568)	2/200	0.101634	0.312456	0.280455	0.650941	-1.22663	2.80455	CG2926;CG1677	GO_BP_autoRIF_predicted_zscore
regulation_of_translational_initiation_(GO:0006446)	2/200	0.101634	0.312456	0.280455	0.650941	-1.22292	2.79606	CG2926;CG1677	GO_BP_autoRIF_predicted_zscore
regulation_of_cell-matrix_adhesion_(GO:0001952)	2/200	0.101634	0.312456	0.280455	0.650941	-1.22178	2.79345	klar;rols	GO_BP_autoRIF_predicted_zscore
lipid_modification_(GO:0030258)	2/200	0.101634	0.312456	0.280455	0.650941	-1.21744	2.78354	CG3918;tgo	GO_BP_autoRIF_predicted_zscore
regulation_of_anatomical_structure_morphogenesis_(GO:0022603)	2/200	0.101634	0.312456	0.280455	0.650941	-1.21606	2.78038	klar;tgo	GO_BP_autoRIF_predicted_zscore
neurotransmitter_biosynthetic_process_(GO:0042136)	2/200	0.101634	0.312456	0.280455	0.650941	-1.21439	2.77657	Sep4;tinc	GO_BP_autoRIF_predicted_zscore
neuromuscular_process_(GO:0050905)	2/200	0.101634	0.312456	0.280455	0.650941	-1.21414	2.776	Sep4;tinc	GO_BP_autoRIF_predicted_zscore
regulation_of_axon_guidance_(GO:1902667)	2/200	0.101634	0.312456	0.280455	0.650941	-1.21272	2.77274	klar;tinc	GO_BP_autoRIF_predicted_zscore
regulation_of_crystal_cell_differentiation_(GO:0042689)	2/200	0.101634	0.312456	0.280455	0.650941	-1.2091	2.76447	CG2926;tgo	GO_BP_autoRIF_predicted_zscore
positive_regulation_of_mitotic_cell_cycle_phase_transition_(GO:1901992)	2/200	0.101634	0.312456	0.280455	0.650941	-1.20909	2.76443	CG10465;pho	GO_BP_autoRIF_predicted_zscore
renal_tubule_morphogenesis_(GO:0061333)	2/200	0.101634	0.312456	0.280455	0.650941	-1.20381	2.75238	klar;rols	GO_BP_autoRIF_predicted_zscore
mitochondrial_respiratory_chain_complex_II_biogenesis_(GO:0097032)	2/200	0.101634	0.312456	0.280455	0.650941	-1.20377	2.75228	CG11180;CkIIalpha	GO_BP_autoRIF_predicted_zscore
positive_regulation_of_DNA_metabolic_process_(GO:0051054)	2/200	0.101634	0.312456	0.280455	0.650941	-1.19764	2.73827	CG3918;tgo	GO_BP_autoRIF_predicted_zscore
snRNA_transcription_from_RNA_polymerase_II_promoter_(GO:0042795)	2/200	0.101634	0.312456	0.280455	0.650941	-1.19478	2.73172	CG3918;tgo	GO_BP_autoRIF_predicted_zscore
peptidyl-diphthamide_metabolic_process_(GO:0017182)	2/200	0.101634	0.312456	0.280455	0.650941	-1.19346	2.7287	klar;rols	GO_BP_autoRIF_predicted_zscore
peripheral_nervous_system_neuron_differentiation_(GO:0048934)	2/200	0.101634	0.312456	0.280455	0.650941	-1.19131	2.72379	rols;tinc	GO_BP_autoRIF_predicted_zscore
muscle_organ_morphogenesis_(GO:0048644)	2/200	0.101634	0.312456	0.280455	0.650941	-1.18702	2.71398	rols;tgo	GO_BP_autoRIF_predicted_zscore
protein_monoubiquitination_(GO:0006513)	2/200	0.101634	0.312456	0.280455	0.650941	-1.18646	2.7127	CG3918;tgo	GO_BP_autoRIF_predicted_zscore
photoreceptor_cell_morphogenesis_(GO:0008594)	2/200	0.101634	0.312456	0.280455	0.650941	-1.1852	2.70981	rols;tinc	GO_BP_autoRIF_predicted_zscore
ventral_cord_development_(GO:0007419)	2/200	0.101634	0.312456	0.280455	0.650941	-1.1839	2.70686	tinc;tgo	GO_BP_autoRIF_predicted_zscore
negative_regulation_of_gene_silencing_(GO:0060969)	2/200	0.101634	0.312456	0.280455	0.650941	-1.18376	2.70654	CG2926;tgo	GO_BP_autoRIF_predicted_zscore
regulation_of_gene_silencing_by_miRNA_(GO:0060964)	2/200	0.101634	0.312456	0.280455	0.650941	-1.17856	2.69465	CG1677;tgo	GO_BP_autoRIF_predicted_zscore
olfactory_learning_(GO:0008355)	2/200	0.101634	0.312456	0.280455	0.650941	-1.1759	2.68856	Sep4;SK	GO_BP_autoRIF_predicted_zscore
leg_disc_development_(GO:0035218)	2/200	0.101634	0.312456	0.280455	0.650941	-1.17097	2.67729	rols;tgo	GO_BP_autoRIF_predicted_zscore
proteasomal_ubiquitin-independent_protein_catabolic_process_(GO:0010499)	2/200	0.101634	0.312456	0.280455	0.650941	-1.17002	2.67512	CCT8;CkIIalpha	GO_BP_autoRIF_predicted_zscore
malate_transport_(GO:0015743)	2/200	0.101634	0.312456	0.280455	0.650941	-1.16947	2.67385	CG3630;Prm	GO_BP_autoRIF_predicted_zscore
regulation_of_compound_eye_photoreceptor_development_(GO:0045314)	2/200	0.101634	0.312456	0.280455	0.650941	-1.16771	2.66983	rols;tinc	GO_BP_autoRIF_predicted_zscore
positive_regulation_of_nervous_system_development_(GO:0051962)	2/200	0.101634	0.312456	0.280455	0.650941	-1.15766	2.64685	tinc;tgo	GO_BP_autoRIF_predicted_zscore
positive_regulation_of_cell_adhesion_(GO:0045785)	2/200	0.101634	0.312456	0.280455	0.650941	-1.15219	2.63434	klar;rols	GO_BP_autoRIF_predicted_zscore
mitochondrion_localization_(GO:0051646)	2/200	0.101634	0.312456	0.280455	0.650941	-1.15004	2.62943	CCT8;Usp5	GO_BP_autoRIF_predicted_zscore
regulation_of_protein_modification_by_small_protein_conjugation_or_removal_(GO:1903320)	2/200	0.101634	0.312456	0.280455	0.650941	-1.14792	2.62459	CdGAPr;CG31313	GO_BP_autoRIF_predicted_zscore
regulation_of_synaptic_activity_(GO:0060025)	2/200	0.101634	0.312456	0.280455	0.650941	-1.14497	2.61783	Sep4;SK	GO_BP_autoRIF_predicted_zscore
posttranscriptional_regulation_of_gene_expression_(GO:0010608)	2/200	0.101634	0.312456	0.280455	0.650941	-1.14136	2.60957	CG1677;tgo	GO_BP_autoRIF_predicted_zscore
positive_regulation_of_gene_expression,_epigenetic_(GO:0045815)	2/200	0.101634	0.312456	0.280455	0.650941	-1.1369	2.59939	CG3918;tgo	GO_BP_autoRIF_predicted_zscore
regulation_of_cyclin-dependent_protein_kinase_activity_(GO:1904029)	2/200	0.101634	0.312456	0.280455	0.650941	-1.13579	2.59684	CG3918;tgo	GO_BP_autoRIF_predicted_zscore
negative_regulation_of_intracellular_signal_transduction_(GO:1902532)	2/200	0.101634	0.312456	0.280455	0.650941	-1.13546	2.59609	CG2926;tgo	GO_BP_autoRIF_predicted_zscore
positive_regulation_of_cell_cycle_(GO:0045787)	2/200	0.101634	0.312456	0.280455	0.650941	-1.131	2.58589	CG3918;tgo	GO_BP_autoRIF_predicted_zscore
myotube_differentiation_(GO:0014902)	2/200	0.101634	0.312456	0.280455	0.650941	-1.13068	2.58516	klar;rols	GO_BP_autoRIF_predicted_zscore
regulation_of_mRNA_metabolic_process_(GO:1903311)	2/200	0.101634	0.312456	0.280455	0.650941	-1.12475	2.57161	CG3918;tgo	GO_BP_autoRIF_predicted_zscore
oocyte_fate_determination_(GO:0030716)	2/200	0.101634	0.312456	0.280455	0.650941	-1.12263	2.56676	CG2926;tgo	GO_BP_autoRIF_predicted_zscore
positive_regulation_of_chromatin_organization_(GO:1905269)	2/200	0.101634	0.312456	0.280455	0.650941	-1.12114	2.56335	CG3918;tgo	GO_BP_autoRIF_predicted_zscore
regulation_of_tube_diameter_(GO:0035296)	2/200	0.101634	0.312456	0.280455	0.650941	-1.11989	2.56049	rols;salr	GO_BP_autoRIF_predicted_zscore
potassium_ion_homeostasis_(GO:0055075)	2/200	0.101634	0.312456	0.280455	0.650941	-1.11549	2.55044	klar;rols	GO_BP_autoRIF_predicted_zscore
sterol_transport_(GO:0015918)	2/200	0.101634	0.312456	0.280455	0.650941	-1.11133	2.54091	klar;tgo	GO_BP_autoRIF_predicted_zscore
response_to_auditory_stimulus_(GO:0010996)	2/200	0.101634	0.312456	0.280455	0.650941	-1.10787	2.53301	rols;salr	GO_BP_autoRIF_predicted_zscore
regulation_of_chromosome_organization_(GO:0033044)	2/200	0.101634	0.312456	0.280455	0.650941	-1.10619	2.52917	CG1677;tgo	GO_BP_autoRIF_predicted_zscore
trachea_development_(GO:0060438)	2/200	0.101634	0.312456	0.280455	0.650941	-1.10578	2.52824	klar;rols	GO_BP_autoRIF_predicted_zscore
regulation_of_terminal_button_organization_(GO:2000331)	2/200	0.101634	0.312456	0.280455	0.650941	-1.10277	2.52135	SK;tinc	GO_BP_autoRIF_predicted_zscore
response_to_sterol_(GO:0036314)	2/200	0.101634	0.312456	0.280455	0.650941	-1.09984	2.51466	klar;Drak	GO_BP_autoRIF_predicted_zscore
visceral_muscle_development_(GO:0007522)	2/200	0.101634	0.312456	0.280455	0.650941	-1.09874	2.51213	rols;tinc	GO_BP_autoRIF_predicted_zscore
regulation_of_peptidoglycan_recognition_protein_signaling_pathway_(GO:0061058)	2/200	0.101634	0.312456	0.280455	0.650941	-1.09746	2.50922	klar;rols	GO_BP_autoRIF_predicted_zscore
positive_regulation_of_protein_modification_by_small_protein_conjugation_or_removal_(GO:1903322)	2/200	0.101634	0.312456	0.280455	0.650941	-1.09669	2.50745	CdGAPr;CG31313	GO_BP_autoRIF_predicted_zscore
response_to_ecdysone_(GO:0035075)	2/200	0.101634	0.312456	0.280455	0.650941	-1.09559	2.50494	klar;rols	GO_BP_autoRIF_predicted_zscore
octopamine_or_tyramine_signaling_pathway_(GO:0007211)	2/200	0.101634	0.312456	0.280455	0.650941	-1.09477	2.50305	Sep4;SK	GO_BP_autoRIF_predicted_zscore
regulation_of_compound_eye_cone_cell_fate_specification_(GO:0042682)	2/200	0.101634	0.312456	0.280455	0.650941	-1.09145	2.49546	rols;tinc	GO_BP_autoRIF_predicted_zscore
morphogenesis_of_an_epithelial_fold_(GO:0060571)	2/200	0.101634	0.312456	0.280455	0.650941	-1.09046	2.49321	klar;rols	GO_BP_autoRIF_predicted_zscore
intra-S_DNA_damage_checkpoint_(GO:0031573)	2/200	0.101634	0.312456	0.280455	0.650941	-1.08733	2.48605	CCT8;CkIIalpha	GO_BP_autoRIF_predicted_zscore
regulation_of_eclosion_(GO:0007563)	2/200	0.101634	0.312456	0.280455	0.650941	-1.08658	2.48432	rols;tinc	GO_BP_autoRIF_predicted_zscore
protein_acylation_(GO:0043543)	2/200	0.101634	0.312456	0.280455	0.650941	-1.08635	2.48381	CG1677;tgo	GO_BP_autoRIF_predicted_zscore
neuromuscular_synaptic_transmission_(GO:0007274)	2/200	0.101634	0.312456	0.280455	0.650941	-1.08601	2.48302	Sep4;SK	GO_BP_autoRIF_predicted_zscore
regulation_of_cell-cell_adhesion_(GO:0022407)	2/200	0.101634	0.312456	0.280455	0.650941	-1.08394	2.47831	klar;rols	GO_BP_autoRIF_predicted_zscore
RNA_metabolic_process_(GO:0016070)	2/200	0.101634	0.312456	0.280455	0.650941	-1.08134	2.47236	CG2926;CG1677	GO_BP_autoRIF_predicted_zscore
protein_oligomerization_(GO:0051259)	2/200	0.101634	0.312456	0.280455	0.650941	-1.07992	2.46911	klar;tgo	GO_BP_autoRIF_predicted_zscore
protein_deubiquitination_(GO:0016579)	2/200	0.101634	0.312456	0.280455	0.650941	-1.07975	2.46873	CG3918;tgo	GO_BP_autoRIF_predicted_zscore
RNA_biosynthetic_process_(GO:0032774)	2/200	0.101634	0.312456	0.280455	0.650941	-1.07855	2.46597	CG2926;CG1677	GO_BP_autoRIF_predicted_zscore
vesicle_transport_along_microtubule_(GO:0047496)	2/200	0.101634	0.312456	0.280455	0.650941	-1.077	2.46242	Sep4;tinc	GO_BP_autoRIF_predicted_zscore
sensory_perception_(GO:0007600)	2/200	0.101634	0.312456	0.280455	0.650941	-1.07582	2.45974	SK;tinc	GO_BP_autoRIF_predicted_zscore
lipid_catabolic_process_(GO:0016042)	2/200	0.101634	0.312456	0.280455	0.650941	-1.07155	2.44997	klar;Drak	GO_BP_autoRIF_predicted_zscore
phototransduction,_visible_light_(GO:0007603)	2/200	0.101634	0.312456	0.280455	0.650941	-1.06544	2.43599	SK;tinc	GO_BP_autoRIF_predicted_zscore
rhodopsin_biosynthetic_process_(GO:0016063)	2/200	0.101634	0.312456	0.280455	0.650941	-1.06078	2.42534	Sep4;tinc	GO_BP_autoRIF_predicted_zscore
positive_regulation_of_blood_circulation_(GO:1903524)	2/200	0.101634	0.312456	0.280455	0.650941	-1.05744	2.41771	CG3918;l(3)05822	GO_BP_autoRIF_predicted_zscore
mitochondrial_electron_transport,_NADH_to_ubiquinone_(GO:0006120)	2/200	0.101634	0.312456	0.280455	0.650941	-1.05534	2.41291	CG3918;l(3)05822	GO_BP_autoRIF_predicted_zscore
mesodermal_cell_fate_specification_(GO:0007501)	2/200	0.101634	0.312456	0.280455	0.650941	-1.04995	2.40059	rols;tgo	GO_BP_autoRIF_predicted_zscore
protein_autoubiquitination_(GO:0051865)	2/200	0.101634	0.312456	0.280455	0.650941	-1.04761	2.39523	CG12384;CCT8	GO_BP_autoRIF_predicted_zscore
protein_deacetylation_(GO:0006476)	2/200	0.101634	0.312456	0.280455	0.650941	-1.04464	2.38845	CG3918;tgo	GO_BP_autoRIF_predicted_zscore
protein_K63-linked_ubiquitination_(GO:0070534)	2/200	0.101634	0.312456	0.280455	0.650941	-1.04385	2.38663	CG5174;CkIIalpha	GO_BP_autoRIF_predicted_zscore
triglyceride_homeostasis_(GO:0070328)	2/200	0.101634	0.312456	0.280455	0.650941	-1.04195	2.3823	klar;Drak	GO_BP_autoRIF_predicted_zscore
positive_regulation_of_cell_migration_(GO:0030335)	2/200	0.101634	0.312456	0.280455	0.650941	-1.03901	2.37558	klar;rols	GO_BP_autoRIF_predicted_zscore
rhodopsin_metabolic_process_(GO:0046154)	2/200	0.101634	0.312456	0.280455	0.650941	-1.03784	2.37289	Sep4;tinc	GO_BP_autoRIF_predicted_zscore
negative_regulation_of_photoreceptor_cell_differentiation_(GO:0046533)	2/200	0.101634	0.312456	0.280455	0.650941	-1.03507	2.36657	klar;tgo	GO_BP_autoRIF_predicted_zscore
positive_regulation_of_muscle_organ_development_(GO:0048636)	2/200	0.101634	0.312456	0.280455	0.650941	-1.03025	2.35555	rols;tinc	GO_BP_autoRIF_predicted_zscore
regulation_of_myoblast_fusion_(GO:1901739)	2/200	0.101634	0.312456	0.280455	0.650941	-1.02569	2.34512	klar;rols	GO_BP_autoRIF_predicted_zscore
secretory_granule_organization_(GO:0033363)	2/200	0.101634	0.312456	0.280455	0.650941	-1.02382	2.34085	klar;rols	GO_BP_autoRIF_predicted_zscore
positive_regulation_of_canonical_Wnt_signaling_pathway_(GO:0090263)	2/200	0.101634	0.312456	0.280455	0.650941	-1.02089	2.33414	CG1677;tgo	GO_BP_autoRIF_predicted_zscore
positive_regulation_of_cell_motility_(GO:2000147)	2/200	0.101634	0.312456	0.280455	0.650941	-1.02081	2.33395	klar;rols	GO_BP_autoRIF_predicted_zscore
protein_methylation_(GO:0006479)	2/200	0.101634	0.312456	0.280455	0.650941	-1.01589	2.32271	CG2926;tgo	GO_BP_autoRIF_predicted_zscore
sex_comb_development_(GO:0045498)	2/200	0.101634	0.312456	0.280455	0.650941	-1.01422	2.31889	CG1677;tgo	GO_BP_autoRIF_predicted_zscore
long-term_memory_(GO:0007616)	2/200	0.101634	0.312456	0.280455	0.650941	-1.01397	2.31833	Sep4;SK	GO_BP_autoRIF_predicted_zscore
positive_regulation_of_neuron_projection_development_(GO:0010976)	2/200	0.101634	0.312456	0.280455	0.650941	-1.0042	2.29598	klar;rols	GO_BP_autoRIF_predicted_zscore
negative_regulation_of_small_GTPase_mediated_signal_transduction_(GO:0051058)	2/200	0.101634	0.312456	0.280455	0.650941	-1.00392	2.29533	CG5174;CkIIalpha	GO_BP_autoRIF_predicted_zscore
response_to_lipid_(GO:0033993)	2/200	0.101634	0.312456	0.280455	0.650941	-1.00128	2.2893	rols;Sep4	GO_BP_autoRIF_predicted_zscore
protein_desumoylation_(GO:0016926)	2/200	0.101634	0.312456	0.280455	0.650941	-0.998959	2.284	CG3918;tgo	GO_BP_autoRIF_predicted_zscore
positive_regulation_of_histone_methylation_(GO:0031062)	2/200	0.101634	0.312456	0.280455	0.650941	-0.996882	2.27925	CG3918;tgo	GO_BP_autoRIF_predicted_zscore
metal_ion_transport_(GO:0030001)	2/200	0.101634	0.312456	0.280455	0.650941	-0.993704	2.27199	CG32486;Sep4	GO_BP_autoRIF_predicted_zscore
regulation_of_short-term_neuronal_synaptic_plasticity_(GO:0048172)	2/200	0.101634	0.312456	0.280455	0.650941	-0.992738	2.26978	Sep4;SK	GO_BP_autoRIF_predicted_zscore
rRNA_processing_(GO:0006364)	2/200	0.101634	0.312456	0.280455	0.650941	-0.989972	2.26345	CG3918;CG11180	GO_BP_autoRIF_predicted_zscore
response_to_carbon_dioxide_(GO:0010037)	2/200	0.101634	0.312456	0.280455	0.650941	-0.986516	2.25555	Sep4;SK	GO_BP_autoRIF_predicted_zscore
myoblast_fusion_(GO:0007520)	2/200	0.101634	0.312456	0.280455	0.650941	-0.979086	2.23856	klar;rols	GO_BP_autoRIF_predicted_zscore
sterol_metabolic_process_(GO:0016125)	2/200	0.101634	0.312456	0.280455	0.650941	-0.977471	2.23487	klar;tgo	GO_BP_autoRIF_predicted_zscore
protein_lipidation_(GO:0006497)	2/200	0.101634	0.312456	0.280455	0.650941	-0.975536	2.23045	rols;tgo	GO_BP_autoRIF_predicted_zscore
sterol_biosynthetic_process_(GO:0016126)	2/200	0.101634	0.312456	0.280455	0.650941	-0.974257	2.22752	klar;tgo	GO_BP_autoRIF_predicted_zscore
sensory_perception_of_sound_(GO:0007605)	2/200	0.101634	0.312456	0.280455	0.650941	-0.973304	2.22534	SK;tinc	GO_BP_autoRIF_predicted_zscore
presynaptic_membrane_assembly_(GO:0097105)	2/200	0.101634	0.312456	0.280455	0.650941	-0.965695	2.20795	CG32486;Sep4	GO_BP_autoRIF_predicted_zscore
regulation_of_muscle_organ_development_(GO:0048634)	2/200	0.101634	0.312456	0.280455	0.650941	-0.964626	2.2055	klar;rols	GO_BP_autoRIF_predicted_zscore
sensory_organ_precursor_cell_fate_determination_(GO:0016360)	2/200	0.101634	0.312456	0.280455	0.650941	-0.961096	2.19743	CG1677;tgo	GO_BP_autoRIF_predicted_zscore
regulation_of_neurotransmitter_secretion_(GO:0046928)	2/200	0.101634	0.312456	0.280455	0.650941	-0.958636	2.19181	Sep4;SK	GO_BP_autoRIF_predicted_zscore
synaptic_vesicle_membrane_organization_(GO:0048499)	2/200	0.101634	0.312456	0.280455	0.650941	-0.957334	2.18883	Sep4;SK	GO_BP_autoRIF_predicted_zscore
promoter_clearance_from_RNA_polymerase_II_promoter_(GO:0001111)	2/200	0.101634	0.312456	0.280455	0.650941	-0.955846	2.18543	CG2926;CG1677	GO_BP_autoRIF_predicted_zscore
presynaptic_membrane_organization_(GO:0097090)	2/200	0.101634	0.312456	0.280455	0.650941	-0.952151	2.17698	Sep4;SK	GO_BP_autoRIF_predicted_zscore
negative_regulation_of_signaling_(GO:0023057)	2/200	0.101634	0.312456	0.280455	0.650941	-0.944113	2.1586	klar;tgo	GO_BP_autoRIF_predicted_zscore
pupal_development_(GO:0035209)	2/200	0.101634	0.312456	0.280455	0.650941	-0.943466	2.15712	klar;rols	GO_BP_autoRIF_predicted_zscore
positive_regulation_of_cellular_component_movement_(GO:0051272)	2/200	0.101634	0.312456	0.280455	0.650941	-0.942541	2.15501	Sep4;SK	GO_BP_autoRIF_predicted_zscore
regulation_of_cellular_amide_metabolic_process_(GO:0034248)	2/200	0.101634	0.312456	0.280455	0.650941	-0.937636	2.14379	Sep4;tinc	GO_BP_autoRIF_predicted_zscore
proboscis_development_(GO:0048728)	2/200	0.101634	0.312456	0.280455	0.650941	-0.928973	2.12399	rols;tinc	GO_BP_autoRIF_predicted_zscore
regulation_of_striated_muscle_tissue_development_(GO:0016202)	2/200	0.101634	0.312456	0.280455	0.650941	-0.910427	2.08158	klar;rols	GO_BP_autoRIF_predicted_zscore
phototaxis_(GO:0042331)	2/200	0.101634	0.312456	0.280455	0.650941	-0.907943	2.0759	Sep4;SK	GO_BP_autoRIF_predicted_zscore
regulation_of_mitotic_recombination_(GO:0000019)	2/200	0.101634	0.312456	0.280455	0.650941	-0.899641	2.05692	CG3918;CG11180	GO_BP_autoRIF_predicted_zscore
positive_regulation_of_stem_cell_proliferation_(GO:2000648)	2/200	0.101634	0.312456	0.280455	0.650941	-0.896065	2.04875	CG1677;tgo	GO_BP_autoRIF_predicted_zscore
response_to_ethanol_(GO:0045471)	2/200	0.101634	0.312456	0.280455	0.650941	-0.893695	2.04333	Sep4;SK	GO_BP_autoRIF_predicted_zscore
response_to_nicotine_(GO:0035094)	2/200	0.101634	0.312456	0.280455	0.650941	-0.892675	2.041	Sep4;SK	GO_BP_autoRIF_predicted_zscore
receptor_localization_to_synapse_(GO:0097120)	2/200	0.101634	0.312456	0.280455	0.650941	-0.890841	2.0368	Sep4;tinc	GO_BP_autoRIF_predicted_zscore
sodium_ion_transmembrane_transport_(GO:0035725)	2/200	0.101634	0.312456	0.280455	0.650941	-0.88844	2.03131	Sep4;SK	GO_BP_autoRIF_predicted_zscore
protein_localization_to_synapse_(GO:0035418)	2/200	0.101634	0.312456	0.280455	0.650941	-0.878116	2.00771	Sep4;tinc	GO_BP_autoRIF_predicted_zscore
synaptic_target_attraction_(GO:0016200)	2/200	0.101634	0.312456	0.280455	0.650941	-0.87604	2.00296	Sep4;tinc	GO_BP_autoRIF_predicted_zscore
trachea_morphogenesis_(GO:0060439)	2/200	0.101634	0.312456	0.280455	0.650941	-0.872663	1.99524	klar;rols	GO_BP_autoRIF_predicted_zscore
short-term_memory_(GO:0007614)	2/200	0.101634	0.312456	0.280455	0.650941	-0.868433	1.98557	Sep4;SK	GO_BP_autoRIF_predicted_zscore
regulation_of_mRNA_processing_(GO:0050684)	2/200	0.101634	0.312456	0.280455	0.650941	-0.86031	1.967	CG1677;tgo	GO_BP_autoRIF_predicted_zscore
regulation_of_muscle_tissue_development_(GO:1901861)	2/200	0.101634	0.312456	0.280455	0.650941	-0.850076	1.9436	klar;rols	GO_BP_autoRIF_predicted_zscore
photoperiodism_(GO:0009648)	2/200	0.101634	0.312456	0.280455	0.650941	-0.84836	1.93967	Sep4;SK	GO_BP_autoRIF_predicted_zscore
synapse_assembly_(GO:0007416)	2/200	0.101634	0.312456	0.280455	0.650941	-0.840578	1.92188	Sep4;tinc	GO_BP_autoRIF_predicted_zscore
regulation_of_G2/M_transition_of_mitotic_cell_cycle_(GO:0010389)	2/200	0.101634	0.312456	0.280455	0.650941	-0.83758	1.91503	CG3918;CG11180	GO_BP_autoRIF_predicted_zscore
positive_regulation_of_Wnt_protein_secretion_(GO:0061357)	2/200	0.101634	0.312456	0.280455	0.650941	-0.834209	1.90732	CG1677;tgo	GO_BP_autoRIF_predicted_zscore
positive_regulation_of_glial_cell_proliferation_(GO:0060252)	2/200	0.101634	0.312456	0.280455	0.650941	-0.833981	1.9068	CG1677;tgo	GO_BP_autoRIF_predicted_zscore
postsynapse_assembly_(GO:0099068)	2/200	0.101634	0.312456	0.280455	0.650941	-0.829395	1.89631	Sep4;SK	GO_BP_autoRIF_predicted_zscore
regulation_of_cuticle_pigmentation_(GO:0048079)	2/200	0.101634	0.312456	0.280455	0.650941	-0.821855	1.87907	klar;Drak	GO_BP_autoRIF_predicted_zscore
regulation_of_calcium_ion_transport_(GO:0051924)	2/200	0.101634	0.312456	0.280455	0.650941	-0.813158	1.85919	Sep4;SK	GO_BP_autoRIF_predicted_zscore
protein_mannosylation_(GO:0035268)	2/200	0.101634	0.312456	0.280455	0.650941	-0.811281	1.8549	klar;rols	GO_BP_autoRIF_predicted_zscore
regulation_of_ion_homeostasis_(GO:2000021)	2/200	0.101634	0.312456	0.280455	0.650941	-0.808093	1.84761	Sep4;SK	GO_BP_autoRIF_predicted_zscore
regulation_of_pole_plasm_oskar_mRNA_localization_(GO:0007317)	2/200	0.101634	0.312456	0.280455	0.650941	-0.807679	1.84666	NaPi-III;Sep4	GO_BP_autoRIF_predicted_zscore
translational_elongation_(GO:0006414)	2/200	0.101634	0.312456	0.280455	0.650941	-0.80661	1.84422	CG2926;CG1677	GO_BP_autoRIF_predicted_zscore
regulation_of_locomotor_rhythm_(GO:1904059)	2/200	0.101634	0.312456	0.280455	0.650941	-0.770664	1.76203	Sep4;SK	GO_BP_autoRIF_predicted_zscore
regulation_of_metal_ion_transport_(GO:0010959)	2/200	0.101634	0.312456	0.280455	0.650941	-0.734819	1.68008	CG32486;Sep4	GO_BP_autoRIF_predicted_zscore
regulation_of_ion_transport_(GO:0043269)	2/200	0.101634	0.312456	0.280455	0.650941	-0.716481	1.63815	Sep4;SK	GO_BP_autoRIF_predicted_zscore
potassium_ion_transport_(GO:0006813)	2/200	0.101634	0.312456	0.280455	0.650941	-0.707119	1.61674	Sep4;SK	GO_BP_autoRIF_predicted_zscore
temperature_compensation_of_the_circadian_clock_(GO:0010378)	2/200	0.101634	0.312456	0.280455	0.650941	-0.680895	1.55679	Sep4;SK	GO_BP_autoRIF_predicted_zscore
trehalose_metabolic_process_(GO:0005991)	2/200	0.101634	0.312456	0.280455	0.650941	-0.672458	1.5375	CG32486;Sep4	GO_BP_autoRIF_predicted_zscore
regulation_of_stress-activated_MAPK_cascade_(GO:0032872)	2/200	0.101634	0.312456	0.280455	0.650941	-0.629839	1.44005	Drak;CG2926	GO_BP_autoRIF_predicted_zscore
nervous system development (GO:0007399)	1/62	0.154547	0.314776	0.262258	0.534158	-1.48036	2.7642	tgo	GO_BP_coexpression_predicted
negative regulation of response to stimulus (GO:0048585)	1/63	0.156837	0.318854	0.265827	0.540434	-1.40282	2.59879	tgo	GO_BP_coexpression_predicted
negative regulation of Wnt signaling pathway (GO:0030178)	1/64	0.159121	0.321726	0.269379	0.544657	-1.17659	2.16268	tgo	GO_BP_coexpression_predicted
negative regulation of gene expression (GO:0010629)	1/64	0.159121	0.321726	0.269379	0.544657	-1.12679	2.07114	tgo	GO_BP_coexpression_predicted
negative regulation of nucleic acid-templated transcription (GO:1903507)	1/64	0.159121	0.321726	0.269379	0.544657	-1.10352	2.02836	tgo	GO_BP_coexpression_predicted
wing disc morphogenesis (GO:0007472)	1/134	0.304762	0.322449	0.45315	0.481598	-0.716436	0.851286	Drak	GO_BP_2018
positive regulation of nucleic acid-templated transcription (GO:1903508)	1/135	0.306652	0.323007	0.45561	0.482052	-0.968653	1.14499	CG3630	GO_BP_2018
eye development (GO:0001654)	1/65	0.161398	0.325737	0.272915	0.5508	-1.43812	2.62295	tgo	GO_BP_coexpression_predicted
spermatogenesis (GO:0007283)	1/141	0.317885	0.333357	0.47015	0.495225	-1.00691	1.15399	Imp	GO_BP_2018
negative regulation of cell differentiation (GO:0045596)	1/67	0.165936	0.334285	0.279936	0.563943	-1.35422	2.43238	CG2926	GO_BP_coexpression_predicted
regulation of smoothened signaling pathway (GO:0008589)	1/68	0.168195	0.338222	0.283422	0.569929	-1.15803	2.06434	tgo	GO_BP_coexpression_predicted
protein transport (GO:0015031)	1/146	0.32711	0.340022	0.481979	0.503211	-0.880551	0.98398	Arf102F	GO_BP_2018
negative regulation of signal transduction (GO:0009968)	1/146	0.32711	0.340022	0.481979	0.503211	-0.768566	0.858841	pigs	GO_BP_2018
regulation of photoreceptor cell differentiation (GO:0046532)	1/71	0.174938	0.349875	0.293781	0.587562	-1.23503	2.15307	CG2926	GO_BP_coexpression_predicted
chromatin-mediated maintenance of transcription (GO:0048096)	1/71	0.174938	0.349875	0.293781	0.587562	-1.1782	2.05399	tgo	GO_BP_coexpression_predicted
regulation of axon regeneration (GO:0048679)	1/71	0.174938	0.349875	0.293781	0.587562	-1.09824	1.91459	CkIIalpha	GO_BP_coexpression_predicted
regulation of cell proliferation (GO:0042127)	1/155	0.343406	0.355403	0.502626	0.522466	-0.904785	0.967071	sls	GO_BP_2018
compound eye photoreceptor development (GO:0042051)	1/74	0.181627	0.361297	0.303995	0.604715	-1.32018	2.25197	tinc	GO_BP_coexpression_predicted
photoreceptor cell morphogenesis (GO:0008594)	1/74	0.181627	0.361297	0.303995	0.604715	-1.23052	2.09903	pigs	GO_BP_coexpression_predicted
transmembrane receptor protein tyrosine kinase signaling pathway (GO:0007169)	1/74	0.181627	0.361297	0.303995	0.604715	-1.2114	2.06641	CG2926	GO_BP_coexpression_predicted
post-embryonic appendage morphogenesis (GO:0035120)	1/161	0.354055	0.364831	0.515944	0.533968	-0.786102	0.816212	Drak	GO_BP_2018
regulation of eclosion (GO:0007563)	1/75	0.183845	0.365053	0.307367	0.610328	-1.11095	1.88158	tgo	GO_BP_coexpression_predicted
ubiquitin-dependent protein catabolic process (GO:0006511)	1/164	0.359315	0.368648	0.522473	0.538374	-0.822434	0.841806	Usp5	GO_BP_2018
negative regulation of cellular process (GO:0048523)	1/76	0.186056	0.368785	0.310724	0.615889	-1.08127	1.81838	CG2926	GO_BP_coexpression_predicted
positive regulation of protein kinase activity (GO:0045860)	1/77	0.188262	0.371827	0.314065	0.620292	-1.18145	1.97293	CG2926	GO_BP_coexpression_predicted
cellular response to hypoxia (GO:0071456)	1/77	0.188262	0.371827	0.314065	0.620292	-1.12217	1.87394	CG2926	GO_BP_coexpression_predicted
negative regulation of protein kinase B signaling (GO:0051898)	1/78	0.190463	0.375503	0.31739	0.624615	-1.07	1.77439	tgo	GO_BP_coexpression_predicted
central nervous system development (GO:0007417)	1/170	0.369711	0.376058	0.535274	0.54681	-0.922115	0.917536	tgo	GO_BP_2018
imaginal disc-derived appendage morphogenesis (GO:0035114)	1/170	0.369711	0.376058	0.535274	0.54681	-0.703392	0.699899	Drak	GO_BP_2018
negative regulation of smoothened signaling pathway (GO:0045879)	1/80	0.194845	0.383461	0.323993	0.624615	-1.1297	1.84767	tgo	GO_BP_coexpression_predicted
activation of GTPase activity (GO:0090630)	1/81	0.197028	0.387069	0.327272	0.624615	-1.18811	1.92998	pigs	GO_BP_coexpression_predicted
proteasome-mediated ubiquitin-dependent protein catabolic process (GO:0043161)	1/178	0.383314	0.388228	0.551826	0.5589	-0.774194	0.742376	Usp5	GO_BP_2018
regulation of autophagosome assembly (GO:2000785)	1/82	0.199205	0.389963	0.330535	0.624615	-1.05626	1.70419	NaPi-III	GO_BP_coexpression_predicted
regulation of gene silencing by miRNA (GO:0060964)	1/82	0.199205	0.389963	0.330535	0.624615	-0.99231	1.60101	CG2926	GO_BP_coexpression_predicted
asymmetric protein localization (GO:0008105)	1/83	0.201376	0.391447	0.333782	0.624615	-1.25362	2.00903	tgo	GO_BP_coexpression_predicted
neuron fate commitment (GO:0048663)	1/83	0.201376	0.391447	0.333782	0.624615	-1.10813	1.77587	tgo	GO_BP_coexpression_predicted
regulation of embryonic cell shape (GO:0016476)	1/83	0.201376	0.391447	0.333782	0.624615	-1.09153	1.74926	CG2926	GO_BP_coexpression_predicted
regulation of canonical Wnt signaling pathway (GO:0060828)	1/83	0.201376	0.391447	0.333782	0.624615	-1.09051	1.74763	tgo	GO_BP_coexpression_predicted
larval midgut cell programmed cell death (GO:0035096)	1/84	0.203541	0.392898	0.337015	0.624615	-1.03225	1.64322	tgo	GO_BP_coexpression_predicted
sensory organ development (GO:0007423)	1/84	0.203541	0.392898	0.337015	0.624615	-1.02606	1.63337	tgo	GO_BP_coexpression_predicted
negative regulation of Toll signaling pathway (GO:0045751)	1/84	0.203541	0.392898	0.337015	0.624615	-1.01824	1.62092	tgo	GO_BP_coexpression_predicted
negative regulation of multicellular organismal process (GO:0051241)	1/84	0.203541	0.392898	0.337015	0.624615	-0.989427	1.57506	tgo	GO_BP_coexpression_predicted
regulation_of_lipid_metabolic_process_(GO:0019216)	1/51	0.128953	0.395496	0.236687	0.650941	-1.4786	3.02863	klar	GO_BP_autoRIF_predicted_zscore
fat body development (GO:0007503)	1/85	0.205701	0.396376	0.340232	0.624615	-0.987756	1.56197	Pxn	GO_BP_coexpression_predicted
protein targeting to vacuole (GO:0006623)	1/86	0.207855	0.399831	0.343433	0.624615	-1.01928	1.6012	CG4822	GO_BP_coexpression_predicted
negative regulation of canonical Wnt signaling pathway (GO:0090090)	1/87	0.210003	0.402565	0.34662	0.624615	-1.02549	1.60041	tgo	GO_BP_coexpression_predicted
mRNA splice site selection (GO:0006376)	1/87	0.210003	0.402565	0.34662	0.624615	-0.921808	1.43861	tgo	GO_BP_coexpression_predicted
cellular response to decreased oxygen levels (GO:0036294)	1/88	0.212145	0.40597	0.349792	0.624615	-1.03559	1.60566	CG2926	GO_BP_coexpression_predicted
positive regulation of multicellular organismal process (GO:0051240)	1/90	0.216412	0.411295	0.356091	0.624615	-1.0201	1.56133	pigs	GO_BP_coexpression_predicted
heart development (GO:0007507)	1/90	0.216412	0.411295	0.356091	0.624615	-1.00458	1.53758	tgo	GO_BP_coexpression_predicted
cellular response to ketone (GO:1901655)	1/90	0.216412	0.411295	0.356091	0.624615	-0.955258	1.46209	tgo	GO_BP_coexpression_predicted
cellular response to sterol (GO:0036315)	1/90	0.216412	0.411295	0.356091	0.624615	-0.953594	1.45954	tgo	GO_BP_coexpression_predicted
regulation of cell size (GO:0008361)	1/91	0.218538	0.414623	0.359218	0.624615	-1.09366	1.66323	CG2926	GO_BP_coexpression_predicted
negative regulation of cell migration (GO:0030336)	1/92	0.220657	0.417215	0.36233	0.624615	-1.02208	1.54452	klar	GO_BP_coexpression_predicted
dendrite guidance (GO:0070983)	1/92	0.220657	0.417215	0.36233	0.624615	-0.860472	1.3003	tgo	GO_BP_coexpression_predicted
organelle_fusion_(GO:0048284)	1/84	0.203541	0.419254	0.357431	0.650941	-2.28786	3.64202	CG5174	GO_BP_autoRIF_predicted_zscore
cytokine-mediated_signaling_pathway_(GO:0019221)	1/79	0.192657	0.419254	0.340419	0.650941	-1.78966	2.94729	pigs	GO_BP_autoRIF_predicted_zscore
ribosomal_small_subunit_assembly_(GO:0000028)	1/55	0.138347	0.419254	0.252429	0.650941	-1.44939	2.86688	CG11180	GO_BP_autoRIF_predicted_zscore
Golgi_vesicle_transport_(GO:0048193)	1/83	0.201376	0.419254	0.354063	0.650941	-1.63365	2.61805	CG5174	GO_BP_autoRIF_predicted_zscore
response_to_cadmium_ion_(GO:0046686)	1/84	0.203541	0.419254	0.357431	0.650941	-1.55142	2.46969	MtnB	GO_BP_autoRIF_predicted_zscore
organelle_membrane_fusion_(GO:0090174)	1/98	0.233257	0.419254	0.40281	0.650941	-1.61488	2.35064	CG5174	GO_BP_autoRIF_predicted_zscore
autophagosome_maturation_(GO:0097352)	1/104	0.245656	0.419254	0.421283	0.650941	-1.64713	2.31228	CG5174	GO_BP_autoRIF_predicted_zscore
lipid_homeostasis_(GO:0055088)	1/96	0.229079	0.419254	0.396524	0.650941	-1.44392	2.12789	klar	GO_BP_autoRIF_predicted_zscore
tricarboxylic_acid_transport_(GO:0006842)	1/87	0.210003	0.419254	0.36743	0.650941	-1.19902	1.87123	CG5174	GO_BP_autoRIF_predicted_zscore
negative_regulation_of_DNA_recombination_(GO:0045910)	1/108	0.253813	0.419254	0.433286	0.650941	-1.3603	1.86519	tgo	GO_BP_autoRIF_predicted_zscore
regulation_of_reactive_oxygen_species_metabolic_process_(GO:2000377)	1/73	0.179403	0.419254	0.319423	0.650941	-1.08098	1.85726	CCT8	GO_BP_autoRIF_predicted_zscore
RNA_interference_(GO:0016246)	1/94	0.22488	0.419254	0.390175	0.650941	-1.21229	1.80897	tgo	GO_BP_autoRIF_predicted_zscore
protein_prenylation_(GO:0018342)	1/71	0.174938	0.419254	0.31228	0.650941	-1.03213	1.79933	tgo	GO_BP_autoRIF_predicted_zscore
protein_geranylgeranylation_(GO:0018344)	1/66	0.16367	0.419254	0.294099	0.650941	-0.989542	1.79098	tgo	GO_BP_autoRIF_predicted_zscore
negative_regulation_of_phosphorylation_(GO:0042326)	1/109	0.255839	0.419254	0.436249	0.650941	-1.30456	1.77839	tgo	GO_BP_autoRIF_predicted_zscore
negative_regulation_of_protein_phosphorylation_(GO:0001933)	1/109	0.255839	0.419254	0.436249	0.650941	-1.30009	1.77229	tgo	GO_BP_autoRIF_predicted_zscore
DNA-dependent_DNA_replication_(GO:0006261)	1/128	0.293316	0.419254	0.489741	0.650941	-1.34919	1.65479	Maf1	GO_BP_autoRIF_predicted_zscore
cellular_response_to_metal_ion_(GO:0071248)	1/130	0.297152	0.419254	0.495074	0.650941	-1.35969	1.65	rols	GO_BP_autoRIF_predicted_zscore
negative_regulation_of_cellular_amide_metabolic_process_(GO:0034249)	1/113	0.263888	0.419254	0.447948	0.650941	-1.1635	1.55006	l(3)05822	GO_BP_autoRIF_predicted_zscore
regulation_of_vesicle_fusion_(GO:0031338)	1/118	0.273828	0.419254	0.462239	0.650941	-1.19352	1.54591	pigs	GO_BP_autoRIF_predicted_zscore
head_involution_(GO:0008258)	1/134	0.304762	0.419254	0.505576	0.650941	-1.23714	1.46999	tgo	GO_BP_autoRIF_predicted_zscore
posttranscriptional_gene_silencing_by_RNA_(GO:0035194)	1/90	0.216412	0.419254	0.377278	0.650941	-0.959463	1.46852	tgo	GO_BP_autoRIF_predicted_zscore
plasma_membrane_invagination_(GO:0099024)	1/135	0.306652	0.419254	0.508168	0.650941	-1.22704	1.45041	tgo	GO_BP_autoRIF_predicted_zscore
nucleotide_phosphorylation_(GO:0046939)	1/153	0.339819	0.419254	0.552612	0.650941	-1.33419	1.44005	tgo	GO_BP_autoRIF_predicted_zscore
oenocyte_development_(GO:0007438)	1/120	0.277768	0.419254	0.467853	0.650941	-1.12406	1.43989	CCT8	GO_BP_autoRIF_predicted_zscore
apoptotic_DNA_fragmentation_(GO:0006309)	1/109	0.255839	0.419254	0.436249	0.650941	-0.996534	1.35848	CG3918	GO_BP_autoRIF_predicted_zscore
hexose_biosynthetic_process_(GO:0019319)	1/116	0.269868	0.419254	0.456566	0.650941	-0.986328	1.29191	CG11180	GO_BP_autoRIF_predicted_zscore
autophagy_of_nucleus_(GO:0044804)	1/116	0.269868	0.419254	0.456566	0.650941	-0.983206	1.28783	CG3918	GO_BP_autoRIF_predicted_zscore
hexose_metabolic_process_(GO:0019318)	1/116	0.269868	0.419254	0.456566	0.650941	-0.970171	1.27075	CG11180	GO_BP_autoRIF_predicted_zscore
negative_regulation_of_dephosphorylation_(GO:0035305)	1/141	0.317885	0.419254	0.523443	0.650941	-1.07842	1.23594	pho	GO_BP_autoRIF_predicted_zscore
negative_regulation_of_protein_dephosphorylation_(GO:0035308)	1/141	0.317885	0.419254	0.523443	0.650941	-1.07537	1.23244	pho	GO_BP_autoRIF_predicted_zscore
negative_regulation_of_cellular_process_(GO:0048523)	1/144	0.323435	0.419254	0.530905	0.650941	-1.09024	1.23061	tgo	GO_BP_autoRIF_predicted_zscore
serine_family_amino_acid_biosynthetic_process_(GO:0009070)	1/133	0.302867	0.419254	0.502971	0.650941	-1.00198	1.19683	tgo	GO_BP_autoRIF_predicted_zscore
negative_regulation_of_neuron_apoptotic_process_(GO:0043524)	1/113	0.263888	0.419254	0.447948	0.650941	-0.898019	1.19637	tgo	GO_BP_autoRIF_predicted_zscore
response_to_hydrogen_peroxide_(GO:0042542)	1/128	0.293316	0.419254	0.489741	0.650941	-0.95937	1.17667	CCT8	GO_BP_autoRIF_predicted_zscore
adherens_junction_maintenance_(GO:0034334)	1/200	0.419254	0.419254	0.650941	0.650941	-1.34819	1.17196	tgo	GO_BP_autoRIF_predicted_zscore
vesicle-mediated_transport_(GO:0016192)	1/134	0.304762	0.419254	0.505576	0.650941	-0.982871	1.16787	CG5174	GO_BP_autoRIF_predicted_zscore
translation_(GO:0006412)	1/140	0.316025	0.419254	0.52093	0.650941	-0.975262	1.12344	tgo	GO_BP_autoRIF_predicted_zscore
protein_localization_to_Golgi_apparatus_(GO:0034067)	1/117	0.271851	0.419254	0.45941	0.650941	-0.855657	1.11449	CG5174	GO_BP_autoRIF_predicted_zscore
heme_biosynthetic_process_(GO:0006783)	1/126	0.28946	0.419254	0.484353	0.650941	-0.890151	1.10355	klar	GO_BP_autoRIF_predicted_zscore
vacuolar_transport_(GO:0007034)	1/128	0.293316	0.419254	0.489741	0.650941	-0.89689	1.10004	CG5174	GO_BP_autoRIF_predicted_zscore
regulation_of_regulated_secretory_pathway_(GO:1903305)	1/129	0.295237	0.419254	0.492414	0.650941	-0.897466	1.09489	tgo	GO_BP_autoRIF_predicted_zscore
negative_regulation_of_intracellular_protein_transport_(GO:0090317)	1/152	0.338018	0.419254	0.55025	0.650941	-1.00277	1.08766	tgo	GO_BP_autoRIF_predicted_zscore
cell_projection_assembly_(GO:0030031)	1/200	0.419254	0.419254	0.650941	0.650941	-1.23695	1.07525	tgo	GO_BP_autoRIF_predicted_zscore
eye_development_(GO:0001654)	1/129	0.295237	0.419254	0.492414	0.650941	-0.879151	1.07255	tgo	GO_BP_autoRIF_predicted_zscore
lamellipodium_assembly_(GO:0030032)	1/157	0.346975	0.419254	0.561941	0.650941	-1.00559	1.06442	tgo	GO_BP_autoRIF_predicted_zscore
regulation_of_MAP_kinase_activity_(GO:0043405)	1/128	0.293316	0.419254	0.489741	0.650941	-0.863637	1.05925	tgo	GO_BP_autoRIF_predicted_zscore
retinal_cell_programmed_cell_death_(GO:0046666)	1/151	0.336212	0.419254	0.547875	0.650941	-0.966405	1.05339	tgo	GO_BP_autoRIF_predicted_zscore
cell_morphogenesis_(GO:0000902)	1/150	0.334401	0.419254	0.545488	0.650941	-0.957772	1.04916	tgo	GO_BP_autoRIF_predicted_zscore
positive_regulation_of_Ras_protein_signal_transduction_(GO:0046579)	1/145	0.325275	0.419254	0.533367	0.650941	-0.927788	1.04198	tgo	GO_BP_autoRIF_predicted_zscore
adherens_junction_assembly_(GO:0034333)	1/200	0.419254	0.419254	0.650941	0.650941	-1.16939	1.01652	klar	GO_BP_autoRIF_predicted_zscore
BMP_signaling_pathway_(GO:0030509)	1/200	0.419254	0.419254	0.650941	0.650941	-1.16718	1.0146	tgo	GO_BP_autoRIF_predicted_zscore
filopodium_assembly_(GO:0046847)	1/157	0.346975	0.419254	0.561941	0.650941	-0.941653	0.996743	tgo	GO_BP_autoRIF_predicted_zscore
antennal_morphogenesis_(GO:0048800)	1/200	0.419254	0.419254	0.650941	0.650941	-1.13498	0.986612	tinc	GO_BP_autoRIF_predicted_zscore
mitochondrial_DNA_metabolic_process_(GO:0032042)	1/164	0.359315	0.419254	0.57781	0.650941	-0.960682	0.98331	CG3918	GO_BP_autoRIF_predicted_zscore
brain_morphogenesis_(GO:0048854)	1/200	0.419254	0.419254	0.650941	0.650941	-1.10365	0.959377	tinc	GO_BP_autoRIF_predicted_zscore
R8_cell_fate_specification_(GO:0045464)	1/143	0.32159	0.419254	0.528431	0.650941	-0.836882	0.949424	tgo	GO_BP_autoRIF_predicted_zscore
regulation_of_SNARE_complex_assembly_(GO:0035542)	1/133	0.302867	0.419254	0.502971	0.650941	-0.788995	0.942425	CG5174	GO_BP_autoRIF_predicted_zscore
genitalia_development_(GO:0048806)	1/200	0.419254	0.419254	0.650941	0.650941	-1.0805	0.939256	tgo	GO_BP_autoRIF_predicted_zscore
retrograde_transport,_endosome_to_Golgi_(GO:0042147)	1/149	0.332586	0.419254	0.543089	0.650941	-0.85274	0.938746	tgo	GO_BP_autoRIF_predicted_zscore
fat_body_development_(GO:0007503)	1/151	0.336212	0.419254	0.547875	0.650941	-0.861149	0.938665	klar	GO_BP_autoRIF_predicted_zscore
chromatin_remodeling_(GO:0006338)	1/200	0.419254	0.419254	0.650941	0.650941	-1.07905	0.937993	tgo	GO_BP_autoRIF_predicted_zscore
positive_regulation_of_protein_kinase_activity_(GO:0045860)	1/153	0.339819	0.419254	0.552612	0.650941	-0.868747	0.937676	tgo	GO_BP_autoRIF_predicted_zscore
membrane_protein_proteolysis_(GO:0033619)	1/172	0.373139	0.419254	0.595258	0.650941	-0.950382	0.936891	tgo	GO_BP_autoRIF_predicted_zscore
terminal_region_determination_(GO:0007362)	1/130	0.297152	0.419254	0.495074	0.650941	-0.765748	0.929244	tgo	GO_BP_autoRIF_predicted_zscore
DNA_conformation_change_(GO:0071103)	1/200	0.419254	0.419254	0.650941	0.650941	-1.06282	0.92389	tgo	GO_BP_autoRIF_predicted_zscore
peptidyl-serine_phosphorylation_(GO:0018105)	1/157	0.346975	0.419254	0.561941	0.650941	-0.871352	0.922329	tgo	GO_BP_autoRIF_predicted_zscore
regulation_of_cell_development_(GO:0060284)	1/141	0.317885	0.419254	0.523443	0.650941	-0.799308	0.916059	tgo	GO_BP_autoRIF_predicted_zscore
male_genitalia_development_(GO:0030539)	1/200	0.419254	0.419254	0.650941	0.650941	-1.04574	0.90904	tgo	GO_BP_autoRIF_predicted_zscore
cellular_protein_catabolic_process_(GO:0044257)	1/158	0.348752	0.419254	0.564243	0.650941	-0.860697	0.906653	tgo	GO_BP_autoRIF_predicted_zscore
negative_regulation_of_apoptotic_process_(GO:0043066)	1/168	0.366264	0.419254	0.586624	0.650941	-0.898003	0.901955	tgo	GO_BP_autoRIF_predicted_zscore
amide_biosynthetic_process_(GO:0043604)	1/200	0.419254	0.419254	0.650941	0.650941	-1.03755	0.901922	klar	GO_BP_autoRIF_predicted_zscore
negative_regulation_of_programmed_cell_death_(GO:0043069)	1/172	0.373139	0.419254	0.595258	0.650941	-0.910269	0.897347	tgo	GO_BP_autoRIF_predicted_zscore
negative_regulation_of_hydrolase_activity_(GO:0051346)	1/167	0.364534	0.419254	0.584438	0.650941	-0.887283	0.895389	tgo	GO_BP_autoRIF_predicted_zscore
basal_protein_localization_(GO:0045175)	1/200	0.419254	0.419254	0.650941	0.650941	-1.02954	0.894957	tgo	GO_BP_autoRIF_predicted_zscore
mRNA_splicing,_via_spliceosome_(GO:0000398)	1/160	0.352292	0.419254	0.568812	0.650941	-0.857069	0.894175	tgo	GO_BP_autoRIF_predicted_zscore
regulation_of_ARF_protein_signal_transduction_(GO:0032012)	1/132	0.300967	0.419254	0.500352	0.650941	-0.742955	0.892106	klar	GO_BP_autoRIF_predicted_zscore
regulation_of_MAPK_cascade_(GO:0043408)	1/138	0.312291	0.419254	0.515865	0.650941	-0.762661	0.8876	tgo	GO_BP_autoRIF_predicted_zscore
negative_regulation_of_humoral_immune_response_(GO:0002921)	1/170	0.369711	0.419254	0.590963	0.650941	-0.886797	0.882394	CG3918	GO_BP_autoRIF_predicted_zscore
cellular_protein_modification_process_(GO:0006464)	1/200	0.419254	0.419254	0.650941	0.650941	-1.01482	0.882158	tgo	GO_BP_autoRIF_predicted_zscore
aerobic_respiration_(GO:0009060)	1/200	0.419254	0.419254	0.650941	0.650941	-1.01312	0.880681	CCT8	GO_BP_autoRIF_predicted_zscore
cellular_metal_ion_homeostasis_(GO:0006875)	1/200	0.419254	0.419254	0.650941	0.650941	-1.00277	0.871688	pigs	GO_BP_autoRIF_predicted_zscore
negative_regulation_of_growth_(GO:0045926)	1/170	0.369711	0.419254	0.590963	0.650941	-0.868845	0.864531	tgo	GO_BP_autoRIF_predicted_zscore
hemopoiesis_(GO:0030097)	1/200	0.419254	0.419254	0.650941	0.650941	-0.994419	0.864426	tgo	GO_BP_autoRIF_predicted_zscore
cell_cycle_G2/M_phase_transition_(GO:0044839)	1/200	0.419254	0.419254	0.650941	0.650941	-0.993184	0.863353	CG3918	GO_BP_autoRIF_predicted_zscore
phosphorylation_(GO:0016310)	1/157	0.346975	0.419254	0.561941	0.650941	-0.815297	0.862994	tgo	GO_BP_autoRIF_predicted_zscore
asymmetric_protein_localization_(GO:0008105)	1/200	0.419254	0.419254	0.650941	0.650941	-0.988823	0.859562	tgo	GO_BP_autoRIF_predicted_zscore
NAD_metabolic_process_(GO:0019674)	1/156	0.345193	0.419254	0.559627	0.650941	-0.805562	0.856837	klar	GO_BP_autoRIF_predicted_zscore
anterograde_trans-synaptic_signaling_(GO:0098916)	1/200	0.419254	0.419254	0.650941	0.650941	-0.981346	0.853062	tinc	GO_BP_autoRIF_predicted_zscore
exocrine_system_development_(GO:0035272)	1/152	0.338018	0.419254	0.55025	0.650941	-0.782509	0.848754	tgo	GO_BP_autoRIF_predicted_zscore
dosage_compensation_(GO:0007549)	1/200	0.419254	0.419254	0.650941	0.650941	-0.975662	0.848121	CG3918	GO_BP_autoRIF_predicted_zscore
antifungal_humoral_response_(GO:0019732)	1/200	0.419254	0.419254	0.650941	0.650941	-0.964647	0.838546	rols	GO_BP_autoRIF_predicted_zscore
mitochondrion_morphogenesis_(GO:0070584)	1/177	0.381629	0.419254	0.605802	0.650941	-0.869197	0.837302	CCT8	GO_BP_autoRIF_predicted_zscore
apical_junction_assembly_(GO:0043297)	1/200	0.419254	0.419254	0.650941	0.650941	-0.95873	0.833402	tgo	GO_BP_autoRIF_predicted_zscore
apical_constriction_(GO:0003383)	1/200	0.419254	0.419254	0.650941	0.650941	-0.956043	0.831067	rols	GO_BP_autoRIF_predicted_zscore
chromatin_silencing_at_telomere_(GO:0006348)	1/200	0.419254	0.419254	0.650941	0.650941	-0.954014	0.829303	CG3918	GO_BP_autoRIF_predicted_zscore
salivary_gland_development_(GO:0007431)	1/137	0.310416	0.419254	0.513312	0.650941	-0.706399	0.826374	tgo	GO_BP_autoRIF_predicted_zscore
anterior/posterior_axis_specification,_embryo_(GO:0008595)	1/200	0.419254	0.419254	0.650941	0.650941	-0.950307	0.826081	rols	GO_BP_autoRIF_predicted_zscore
positive_chemotaxis_(GO:0050918)	1/178	0.383314	0.419254	0.607878	0.650941	-0.856976	0.821755	tgo	GO_BP_autoRIF_predicted_zscore
miRNA_metabolic_process_(GO:0010586)	1/160	0.352292	0.419254	0.568812	0.650941	-0.787464	0.821557	tgo	GO_BP_autoRIF_predicted_zscore
anterior_head_development_(GO:0097065)	1/200	0.419254	0.419254	0.650941	0.650941	-0.944675	0.821185	tgo	GO_BP_autoRIF_predicted_zscore
cofactor_biosynthetic_process_(GO:0051188)	1/200	0.419254	0.419254	0.650941	0.650941	-0.943389	0.820067	tgo	GO_BP_autoRIF_predicted_zscore
cell-cell_adhesion_via_plasma-membrane_adhesion_molecules_(GO:0098742)	1/200	0.419254	0.419254	0.650941	0.650941	-0.942863	0.81961	tinc	GO_BP_autoRIF_predicted_zscore
detection_of_UV_(GO:0009589)	1/200	0.419254	0.419254	0.650941	0.650941	-0.942332	0.819148	tinc	GO_BP_autoRIF_predicted_zscore
mRNA_splice_site_selection_(GO:0006376)	1/180	0.386669	0.419254	0.611999	0.650941	-0.856431	0.813768	tgo	GO_BP_autoRIF_predicted_zscore
axon_extension_(GO:0048675)	1/200	0.419254	0.419254	0.650941	0.650941	-0.936058	0.813695	klar	GO_BP_autoRIF_predicted_zscore
nuclear_migration_(GO:0007097)	1/169	0.36799	0.419254	0.588799	0.650941	-0.812782	0.812538	tgo	GO_BP_autoRIF_predicted_zscore
axonogenesis_(GO:0007409)	1/200	0.419254	0.419254	0.650941	0.650941	-0.924234	0.803416	tinc	GO_BP_autoRIF_predicted_zscore
glucose_homeostasis_(GO:0042593)	1/179	0.384994	0.419254	0.609944	0.650941	-0.841506	0.803241	rols	GO_BP_autoRIF_predicted_zscore
axon_development_(GO:0061564)	1/200	0.419254	0.419254	0.650941	0.650941	-0.923128	0.802454	tinc	GO_BP_autoRIF_predicted_zscore
activation_of_protein_kinase_activity_(GO:0032147)	1/200	0.419254	0.419254	0.650941	0.650941	-0.918808	0.7987	CG2926	GO_BP_autoRIF_predicted_zscore
embryonic_hemopoiesis_(GO:0035162)	1/200	0.419254	0.419254	0.650941	0.650941	-0.917079	0.797196	tgo	GO_BP_autoRIF_predicted_zscore
female_gamete_generation_(GO:0007292)	1/200	0.419254	0.419254	0.650941	0.650941	-0.916973	0.797105	tgo	GO_BP_autoRIF_predicted_zscore
lymph_gland_development_(GO:0048542)	1/200	0.419254	0.419254	0.650941	0.650941	-0.910521	0.791496	tgo	GO_BP_autoRIF_predicted_zscore
axonal_transport_(GO:0098930)	1/200	0.419254	0.419254	0.650941	0.650941	-0.909426	0.790544	pigs	GO_BP_autoRIF_predicted_zscore
central_nervous_system_development_(GO:0007417)	1/200	0.419254	0.419254	0.650941	0.650941	-0.907021	0.788453	tinc	GO_BP_autoRIF_predicted_zscore
vesicle_budding_from_membrane_(GO:0006900)	1/154	0.341615	0.419254	0.554962	0.650941	-0.72991	0.783976	CG5174	GO_BP_autoRIF_predicted_zscore
negative_regulation_of_developmental_growth_(GO:0048640)	1/156	0.345193	0.419254	0.559627	0.650941	-0.736631	0.783519	tgo	GO_BP_autoRIF_predicted_zscore
positive_regulation_of_protein_phosphorylation_(GO:0001934)	1/156	0.345193	0.419254	0.559627	0.650941	-0.736249	0.783112	tgo	GO_BP_autoRIF_predicted_zscore
epithelial_cell_morphogenesis_involved_in_gastrulation_(GO:0003381)	1/200	0.419254	0.419254	0.650941	0.650941	-0.894122	0.777241	tgo	GO_BP_autoRIF_predicted_zscore
anterior/posterior_pattern_specification_(GO:0009952)	1/200	0.419254	0.419254	0.650941	0.650941	-0.893233	0.776468	tgo	GO_BP_autoRIF_predicted_zscore
positive_regulation_of_kinase_activity_(GO:0033674)	1/160	0.352292	0.419254	0.568812	0.650941	-0.740262	0.772311	tgo	GO_BP_autoRIF_predicted_zscore
enteroendocrine_cell_differentiation_(GO:0035883)	1/153	0.339819	0.419254	0.552612	0.650941	-0.710171	0.766518	tgo	GO_BP_autoRIF_predicted_zscore
negative_regulation_of_translation_(GO:0017148)	1/180	0.386669	0.419254	0.611999	0.650941	-0.800523	0.760645	tgo	GO_BP_autoRIF_predicted_zscore
DNA_endoreduplication_(GO:0042023)	1/200	0.419254	0.419254	0.650941	0.650941	-0.871184	0.757301	CG3918	GO_BP_autoRIF_predicted_zscore
chloride_ion_homeostasis_(GO:0055064)	1/200	0.419254	0.419254	0.650941	0.650941	-0.870745	0.756919	rols	GO_BP_autoRIF_predicted_zscore
actin_filament_organization_(GO:0007015)	1/200	0.419254	0.419254	0.650941	0.650941	-0.868248	0.754748	klar	GO_BP_autoRIF_predicted_zscore
cell-cell_junction_assembly_(GO:0007043)	1/200	0.419254	0.419254	0.650941	0.650941	-0.866207	0.752974	tinc	GO_BP_autoRIF_predicted_zscore
activation_of_adenylate_cyclase_activity_(GO:0007190)	1/200	0.419254	0.419254	0.650941	0.650941	-0.863858	0.750933	SK	GO_BP_autoRIF_predicted_zscore
acylglycerol_homeostasis_(GO:0055090)	1/200	0.419254	0.419254	0.650941	0.650941	-0.861678	0.749038	Drak	GO_BP_autoRIF_predicted_zscore
cell_junction_assembly_(GO:0034329)	1/200	0.419254	0.419254	0.650941	0.650941	-0.860458	0.747977	tinc	GO_BP_autoRIF_predicted_zscore
regulation_of_signal_transduction_(GO:0009966)	1/172	0.373139	0.419254	0.595258	0.650941	-0.757	0.746255	tgo	GO_BP_autoRIF_predicted_zscore
autophagosome_assembly_(GO:0000045)	1/200	0.419254	0.419254	0.650941	0.650941	-0.849425	0.738386	rogdi	GO_BP_autoRIF_predicted_zscore
ERAD_pathway_(GO:0036503)	1/200	0.419254	0.419254	0.650941	0.650941	-0.848783	0.737828	CG5174	GO_BP_autoRIF_predicted_zscore
asymmetric_neuroblast_division_(GO:0055059)	1/200	0.419254	0.419254	0.650941	0.650941	-0.841113	0.731161	tgo	GO_BP_autoRIF_predicted_zscore
lipid_translocation_(GO:0034204)	1/200	0.419254	0.419254	0.650941	0.650941	-0.839597	0.729843	pigs	GO_BP_autoRIF_predicted_zscore
histone_H4-K16_acetylation_(GO:0043984)	1/200	0.419254	0.419254	0.650941	0.650941	-0.838241	0.728665	CG3918	GO_BP_autoRIF_predicted_zscore
axonal_fasciculation_(GO:0007413)	1/200	0.419254	0.419254	0.650941	0.650941	-0.834588	0.725489	tinc	GO_BP_autoRIF_predicted_zscore
brain_segmentation_(GO:0035284)	1/200	0.419254	0.419254	0.650941	0.650941	-0.828366	0.72008	tgo	GO_BP_autoRIF_predicted_zscore
calcium-mediated_signaling_(GO:0019722)	1/200	0.419254	0.419254	0.650941	0.650941	-0.82673	0.718658	tinc	GO_BP_autoRIF_predicted_zscore
cell_morphogenesis_involved_in_neuron_differentiation_(GO:0048667)	1/200	0.419254	0.419254	0.650941	0.650941	-0.826066	0.718081	tgo	GO_BP_autoRIF_predicted_zscore
chondroitin_sulfate_proteoglycan_biosynthetic_process_(GO:0050650)	1/149	0.332586	0.419254	0.543089	0.650941	-0.649062	0.714525	tgo	GO_BP_autoRIF_predicted_zscore
chromosome_organization_(GO:0051276)	1/200	0.419254	0.419254	0.650941	0.650941	-0.821333	0.713966	CG3918	GO_BP_autoRIF_predicted_zscore
axon_extension_involved_in_axon_guidance_(GO:0048846)	1/200	0.419254	0.419254	0.650941	0.650941	-0.815569	0.708956	CG3918	GO_BP_autoRIF_predicted_zscore
regulation_of_phosphatase_activity_(GO:0010921)	1/159	0.350524	0.419254	0.566534	0.650941	-0.676167	0.708843	CG2926	GO_BP_autoRIF_predicted_zscore
positive_regulation_of_phosphorylation_(GO:0042327)	1/158	0.348752	0.419254	0.564243	0.650941	-0.669579	0.70533	tgo	GO_BP_autoRIF_predicted_zscore
GPI_anchor_biosynthetic_process_(GO:0006506)	1/200	0.419254	0.419254	0.650941	0.650941	-0.8108	0.704811	rols	GO_BP_autoRIF_predicted_zscore
cellular_protein_metabolic_process_(GO:0044267)	1/177	0.381629	0.419254	0.605802	0.650941	-0.73159	0.704745	tgo	GO_BP_autoRIF_predicted_zscore
acidic_amino_acid_transport_(GO:0015800)	1/200	0.419254	0.419254	0.650941	0.650941	-0.810005	0.70412	SK	GO_BP_autoRIF_predicted_zscore
copper_ion_homeostasis_(GO:0055070)	1/200	0.419254	0.419254	0.650941	0.650941	-0.809599	0.703767	MtnB	GO_BP_autoRIF_predicted_zscore
chloride_transmembrane_transport_(GO:1902476)	1/200	0.419254	0.419254	0.650941	0.650941	-0.805013	0.69978	CG5174	GO_BP_autoRIF_predicted_zscore
regulation_of_neuron_apoptotic_process_(GO:0043523)	1/127	0.291391	0.419254	0.487054	0.650941	-0.565696	0.697554	tgo	GO_BP_autoRIF_predicted_zscore
cardiac_cell_fate_commitment_(GO:0060911)	1/200	0.419254	0.419254	0.650941	0.650941	-0.798426	0.694054	tinc	GO_BP_autoRIF_predicted_zscore
GPI_anchor_metabolic_process_(GO:0006505)	1/200	0.419254	0.419254	0.650941	0.650941	-0.797391	0.693154	rols	GO_BP_autoRIF_predicted_zscore
compound_eye_morphogenesis_(GO:0001745)	1/200	0.419254	0.419254	0.650941	0.650941	-0.795511	0.69152	tgo	GO_BP_autoRIF_predicted_zscore
determination_of_bilateral_symmetry_(GO:0009855)	1/185	0.39498	0.419254	0.622116	0.650941	-0.743649	0.690791	tgo	GO_BP_autoRIF_predicted_zscore
digestive_system_development_(GO:0055123)	1/155	0.343406	0.419254	0.557301	0.650941	-0.643983	0.688316	tgo	GO_BP_autoRIF_predicted_zscore
response_to_endoplasmic_reticulum_stress_(GO:0034976)	1/184	0.393327	0.419254	0.620113	0.650941	-0.736099	0.686865	CG5174	GO_BP_autoRIF_predicted_zscore
medium-chain_fatty_acid_metabolic_process_(GO:0051791)	1/200	0.419254	0.419254	0.650941	0.650941	-0.78933	0.686147	CG11151	GO_BP_autoRIF_predicted_zscore
negative_regulation_of_cell_proliferation_(GO:0008285)	1/179	0.384994	0.419254	0.609944	0.650941	-0.717331	0.684713	tgo	GO_BP_autoRIF_predicted_zscore
appendage_segmentation_(GO:0035285)	1/200	0.419254	0.419254	0.650941	0.650941	-0.78494	0.682331	rols	GO_BP_autoRIF_predicted_zscore
cellular_response_to_gamma_radiation_(GO:0071480)	1/190	0.40318	0.419254	0.631974	0.650941	-0.749782	0.681081	CG3918	GO_BP_autoRIF_predicted_zscore
negative_regulation_of_ATPase_activity_(GO:0032780)	1/200	0.419254	0.419254	0.650941	0.650941	-0.780916	0.678833	tgo	GO_BP_autoRIF_predicted_zscore
compound_eye_photoreceptor_development_(GO:0042051)	1/200	0.419254	0.419254	0.650941	0.650941	-0.778183	0.676457	tinc	GO_BP_autoRIF_predicted_zscore
positive_regulation_of_hydrolase_activity_(GO:0051345)	1/161	0.354055	0.419254	0.571079	0.650941	-0.65029	0.675198	tgo	GO_BP_autoRIF_predicted_zscore
regulation_of_eye_pigmentation_(GO:0048073)	1/151	0.336212	0.419254	0.547875	0.650941	-0.615547	0.670955	tgo	GO_BP_autoRIF_predicted_zscore
axonal_transport_of_mitochondrion_(GO:0019896)	1/200	0.419254	0.419254	0.650941	0.650941	-0.769014	0.668487	Sep4	GO_BP_autoRIF_predicted_zscore
regulation_of_protein_phosphorylation_(GO:0001932)	1/161	0.354055	0.419254	0.571079	0.650941	-0.642375	0.66698	tgo	GO_BP_autoRIF_predicted_zscore
heterochromatin_assembly_(GO:0031507)	1/200	0.419254	0.419254	0.650941	0.650941	-0.766978	0.666717	CG3918	GO_BP_autoRIF_predicted_zscore
histone_mRNA_metabolic_process_(GO:0008334)	1/200	0.419254	0.419254	0.650941	0.650941	-0.766099	0.665953	CG3918	GO_BP_autoRIF_predicted_zscore
cellular_respiration_(GO:0045333)	1/200	0.419254	0.419254	0.650941	0.650941	-0.75791	0.658834	CCT8	GO_BP_autoRIF_predicted_zscore
ERBB_signaling_pathway_(GO:0038127)	1/200	0.419254	0.419254	0.650941	0.650941	-0.754749	0.656086	tgo	GO_BP_autoRIF_predicted_zscore
gonad_development_(GO:0008406)	1/200	0.419254	0.419254	0.650941	0.650941	-0.754686	0.656032	tgo	GO_BP_autoRIF_predicted_zscore
convergent_extension_(GO:0060026)	1/200	0.419254	0.419254	0.650941	0.650941	-0.75282	0.65441	tgo	GO_BP_autoRIF_predicted_zscore
cellular_response_to_sterol_(GO:0036315)	1/200	0.419254	0.419254	0.650941	0.650941	-0.751113	0.652926	klar	GO_BP_autoRIF_predicted_zscore
anterior_head_segmentation_(GO:0035288)	1/200	0.419254	0.419254	0.650941	0.650941	-0.74771	0.649968	tgo	GO_BP_autoRIF_predicted_zscore
axis_elongation_(GO:0003401)	1/200	0.419254	0.419254	0.650941	0.650941	-0.743737	0.646514	tgo	GO_BP_autoRIF_predicted_zscore
embryonic_organ_development_(GO:0048568)	1/200	0.419254	0.419254	0.650941	0.650941	-0.741968	0.644976	tgo	GO_BP_autoRIF_predicted_zscore
negative_regulation_of_chromatin_organization_(GO:1905268)	1/192	0.406429	0.419254	0.635847	0.650941	-0.711412	0.640516	CG3918	GO_BP_autoRIF_predicted_zscore
regulation_of_cellular_protein_metabolic_process_(GO:0032268)	1/175	0.378247	0.419254	0.601617	0.650941	-0.658812	0.640503	tgo	GO_BP_autoRIF_predicted_zscore
mRNA_methylation_(GO:0080009)	1/200	0.419254	0.419254	0.650941	0.650941	-0.731281	0.635686	CG3918	GO_BP_autoRIF_predicted_zscore
regulation_of_feeding_behavior_(GO:0060259)	1/153	0.339819	0.419254	0.552612	0.650941	-0.586843	0.633405	Sep4	GO_BP_autoRIF_predicted_zscore
adult_somatic_muscle_development_(GO:0007527)	1/200	0.419254	0.419254	0.650941	0.650941	-0.727072	0.632028	tgo	GO_BP_autoRIF_predicted_zscore
organelle_disassembly_(GO:1903008)	1/200	0.419254	0.419254	0.650941	0.650941	-0.726905	0.631882	tgo	GO_BP_autoRIF_predicted_zscore
positive_regulation_of_peptide_hormone_secretion_(GO:0090277)	1/168	0.366264	0.419254	0.586624	0.650941	-0.629107	0.631875	CG2926	GO_BP_autoRIF_predicted_zscore
lipid_particle_organization_(GO:0034389)	1/200	0.419254	0.419254	0.650941	0.650941	-0.726706	0.631709	CG3918	GO_BP_autoRIF_predicted_zscore
negative_regulation_of_cell_migration_(GO:0030336)	1/185	0.39498	0.419254	0.622116	0.650941	-0.676397	0.628318	tgo	GO_BP_autoRIF_predicted_zscore
catecholamine_biosynthetic_process_(GO:0042423)	1/200	0.419254	0.419254	0.650941	0.650941	-0.720897	0.62666	Sep4	GO_BP_autoRIF_predicted_zscore
alpha-amino_acid_catabolic_process_(GO:1901606)	1/200	0.419254	0.419254	0.650941	0.650941	-0.720473	0.626291	Sep4	GO_BP_autoRIF_predicted_zscore
acyl-CoA_biosynthetic_process_(GO:0071616)	1/200	0.419254	0.419254	0.650941	0.650941	-0.719815	0.625719	NaPi-III	GO_BP_autoRIF_predicted_zscore
acyl-CoA_metabolic_process_(GO:0006637)	1/200	0.419254	0.419254	0.650941	0.650941	-0.719549	0.625488	NaPi-III	GO_BP_autoRIF_predicted_zscore
mitochondrial_protein_processing_(GO:0034982)	1/200	0.419254	0.419254	0.650941	0.650941	-0.71939	0.62535	CCT8	GO_BP_autoRIF_predicted_zscore
nucleic_acid_metabolic_process_(GO:0090304)	1/170	0.369711	0.419254	0.590963	0.650941	-0.623528	0.620432	tgo	GO_BP_autoRIF_predicted_zscore
anterograde_axonal_transport_(GO:0008089)	1/200	0.419254	0.419254	0.650941	0.650941	-0.713401	0.620144	Sep4	GO_BP_autoRIF_predicted_zscore
positive_regulation_of_neuron_maturation_(GO:0014042)	1/175	0.378247	0.419254	0.601617	0.650941	-0.63694	0.619239	CG2926	GO_BP_autoRIF_predicted_zscore
epidermal_cell_differentiation_(GO:0009913)	1/163	0.357567	0.419254	0.575578	0.650941	-0.6007	0.61778	tgo	GO_BP_autoRIF_predicted_zscore
catecholamine_metabolic_process_(GO:0006584)	1/200	0.419254	0.419254	0.650941	0.650941	-0.709873	0.617077	Sep4	GO_BP_autoRIF_predicted_zscore
intestinal_stem_cell_homeostasis_(GO:0036335)	1/186	0.396629	0.419254	0.624108	0.650941	-0.667168	0.616966	klar	GO_BP_autoRIF_predicted_zscore
epithelial_cell_morphogenesis_(GO:0003382)	1/200	0.419254	0.419254	0.650941	0.650941	-0.709627	0.616863	tgo	GO_BP_autoRIF_predicted_zscore
positive_regulation_of_intracellular_signal_transduction_(GO:1902533)	1/174	0.376549	0.419254	0.599508	0.650941	-0.630684	0.615994	tgo	GO_BP_autoRIF_predicted_zscore
aspartate_family_amino_acid_catabolic_process_(GO:0009068)	1/200	0.419254	0.419254	0.650941	0.650941	-0.708327	0.615733	Sep4	GO_BP_autoRIF_predicted_zscore
regulation_of_protein_export_from_nucleus_(GO:0046825)	1/185	0.39498	0.419254	0.622116	0.650941	-0.662657	0.615556	tgo	GO_BP_autoRIF_predicted_zscore
dendrite_morphogenesis_(GO:0048813)	1/200	0.419254	0.419254	0.650941	0.650941	-0.704236	0.612177	tinc	GO_BP_autoRIF_predicted_zscore
Golgi_organization_(GO:0007030)	1/200	0.419254	0.419254	0.650941	0.650941	-0.703468	0.611509	CG5174	GO_BP_autoRIF_predicted_zscore
alpha-amino_acid_metabolic_process_(GO:1901605)	1/200	0.419254	0.419254	0.650941	0.650941	-0.702073	0.610297	Sep4	GO_BP_autoRIF_predicted_zscore
formation_of_animal_organ_boundary_(GO:0010160)	1/200	0.419254	0.419254	0.650941	0.650941	-0.700579	0.608997	tgo	GO_BP_autoRIF_predicted_zscore
aspartate_family_amino_acid_biosynthetic_process_(GO:0009067)	1/200	0.419254	0.419254	0.650941	0.650941	-0.699867	0.608379	Sep4	GO_BP_autoRIF_predicted_zscore
receptor_clustering_(GO:0043113)	1/175	0.378247	0.419254	0.601617	0.650941	-0.62452	0.607163	tinc	GO_BP_autoRIF_predicted_zscore
regulation_of_cellular_biosynthetic_process_(GO:0031326)	1/169	0.36799	0.419254	0.588799	0.650941	-0.606683	0.606501	tgo	GO_BP_autoRIF_predicted_zscore
homophilic_cell_adhesion_via_plasma_membrane_adhesion_molecules_(GO:0007156)	1/200	0.419254	0.419254	0.650941	0.650941	-0.697588	0.606398	tgo	GO_BP_autoRIF_predicted_zscore
regulation_of_secretion_by_cell_(GO:1903530)	1/164	0.359315	0.419254	0.57781	0.650941	-0.592108	0.606055	tgo	GO_BP_autoRIF_predicted_zscore
sulfur_compound_transport_(GO:0072348)	1/175	0.378247	0.419254	0.601617	0.650941	-0.623341	0.606018	pigs	GO_BP_autoRIF_predicted_zscore
negative_regulation_of_defense_response_to_bacterium_(GO:1900425)	1/200	0.419254	0.419254	0.650941	0.650941	-0.69713	0.606	LamC	GO_BP_autoRIF_predicted_zscore
eye_photoreceptor_cell_development_(GO:0042462)	1/200	0.419254	0.419254	0.650941	0.650941	-0.695974	0.604995	tinc	GO_BP_autoRIF_predicted_zscore
cell_part_morphogenesis_(GO:0032990)	1/200	0.419254	0.419254	0.650941	0.650941	-0.694405	0.603631	rols	GO_BP_autoRIF_predicted_zscore
protein_polyubiquitination_(GO:0000209)	1/177	0.381629	0.419254	0.605802	0.650941	-0.625981	0.603011	CG3918	GO_BP_autoRIF_predicted_zscore
positive_regulation_of_cellular_process_(GO:0048522)	1/171	0.371427	0.419254	0.593116	0.650941	-0.608392	0.602553	tgo	GO_BP_autoRIF_predicted_zscore
cellular_iron_ion_homeostasis_(GO:0006879)	1/200	0.419254	0.419254	0.650941	0.650941	-0.691362	0.600986	CG4822	GO_BP_autoRIF_predicted_zscore
regulation_of_cellular_catabolic_process_(GO:0031329)	1/169	0.36799	0.419254	0.588799	0.650941	-0.599606	0.599426	tgo	GO_BP_autoRIF_predicted_zscore
cardioblast_differentiation_(GO:0010002)	1/200	0.419254	0.419254	0.650941	0.650941	-0.685577	0.595957	tgo	GO_BP_autoRIF_predicted_zscore
positive_regulation_of_epidermal_growth_factor_receptor_signaling_pathway_(GO:0045742)	1/159	0.350524	0.419254	0.566534	0.650941	-0.56353	0.590762	tgo	GO_BP_autoRIF_predicted_zscore
4-hydroxyproline_metabolic_process_(GO:0019471)	1/156	0.345193	0.419254	0.559627	0.650941	-0.552334	0.587491	CCT8	GO_BP_autoRIF_predicted_zscore
cellular_glucose_homeostasis_(GO:0001678)	1/200	0.419254	0.419254	0.650941	0.650941	-0.674205	0.586072	Sep4	GO_BP_autoRIF_predicted_zscore
AMP_biosynthetic_process_(GO:0006167)	1/200	0.419254	0.419254	0.650941	0.650941	-0.673686	0.58562	Drak	GO_BP_autoRIF_predicted_zscore
establishment_of_spindle_orientation_(GO:0051294)	1/200	0.419254	0.419254	0.650941	0.650941	-0.673517	0.585473	CG3918	GO_BP_autoRIF_predicted_zscore
mitochondrial_RNA_processing_(GO:0000963)	1/200	0.419254	0.419254	0.650941	0.650941	-0.673242	0.585234	CCT8	GO_BP_autoRIF_predicted_zscore
generation_of_neurons_(GO:0048699)	1/191	0.404807	0.419254	0.633915	0.650941	-0.645	0.583303	tinc	GO_BP_autoRIF_predicted_zscore
cuticle_pattern_formation_(GO:0035017)	1/200	0.419254	0.419254	0.650941	0.650941	-0.670776	0.583091	tgo	GO_BP_autoRIF_predicted_zscore
central_nervous_system_segmentation_(GO:0035283)	1/200	0.419254	0.419254	0.650941	0.650941	-0.670598	0.582936	tgo	GO_BP_autoRIF_predicted_zscore
negative_regulation_of_neuromuscular_junction_development_(GO:1904397)	1/200	0.419254	0.419254	0.650941	0.650941	-0.669559	0.582033	klar	GO_BP_autoRIF_predicted_zscore
glucose_import_(GO:0046323)	1/200	0.419254	0.419254	0.650941	0.650941	-0.668917	0.581475	rols	GO_BP_autoRIF_predicted_zscore
gene_silencing_by_miRNA_(GO:0035195)	1/200	0.419254	0.419254	0.650941	0.650941	-0.667923	0.580611	tgo	GO_BP_autoRIF_predicted_zscore
vesicle_fusion_(GO:0006906)	1/172	0.373139	0.419254	0.595258	0.650941	-0.588752	0.580395	pigs	GO_BP_autoRIF_predicted_zscore
regulation_of_cellular_metabolic_process_(GO:0031323)	1/169	0.36799	0.419254	0.588799	0.650941	-0.579948	0.579774	tgo	GO_BP_autoRIF_predicted_zscore
N-terminal_peptidyl-methionine_acetylation_(GO:0017196)	1/200	0.419254	0.419254	0.650941	0.650941	-0.665794	0.57876	tgo	GO_BP_autoRIF_predicted_zscore
heterochromatin_organization_(GO:0070828)	1/200	0.419254	0.419254	0.650941	0.650941	-0.662314	0.575735	CG3918	GO_BP_autoRIF_predicted_zscore
endothelial_cell_development_(GO:0001885)	1/200	0.419254	0.419254	0.650941	0.650941	-0.661295	0.574849	tgo	GO_BP_autoRIF_predicted_zscore
determination_of_genital_disc_primordium_(GO:0035225)	1/200	0.419254	0.419254	0.650941	0.650941	-0.659774	0.573527	rols	GO_BP_autoRIF_predicted_zscore
positive_regulation_of_Toll_signaling_pathway_(GO:0045752)	1/167	0.364534	0.419254	0.584438	0.650941	-0.567549	0.572734	klar	GO_BP_autoRIF_predicted_zscore
inner_mitochondrial_membrane_organization_(GO:0007007)	1/200	0.419254	0.419254	0.650941	0.650941	-0.657708	0.571731	Past1	GO_BP_autoRIF_predicted_zscore
positive_regulation_of_retinal_cell_programmed_cell_death_(GO:0046670)	1/165	0.36106	0.419254	0.580031	0.650941	-0.560279	0.570763	tgo	GO_BP_autoRIF_predicted_zscore
positive_regulation_of_intracellular_protein_transport_(GO:0090316)	1/182	0.390007	0.419254	0.616077	0.650941	-0.604396	0.569094	tgo	GO_BP_autoRIF_predicted_zscore
central_nervous_system_neuron_axonogenesis_(GO:0021955)	1/200	0.419254	0.419254	0.650941	0.650941	-0.652894	0.567547	tinc	GO_BP_autoRIF_predicted_zscore
glial_cell_development_(GO:0021782)	1/200	0.419254	0.419254	0.650941	0.650941	-0.652058	0.566819	klar	GO_BP_autoRIF_predicted_zscore
glial_cell_differentiation_(GO:0010001)	1/171	0.371427	0.419254	0.593116	0.650941	-0.570916	0.565437	tgo	GO_BP_autoRIF_predicted_zscore
carbohydrate_biosynthetic_process_(GO:0016051)	1/180	0.386669	0.419254	0.611999	0.650941	-0.593218	0.563667	tgo	GO_BP_autoRIF_predicted_zscore
delamination_(GO:0060232)	1/200	0.419254	0.419254	0.650941	0.650941	-0.645992	0.561546	tgo	GO_BP_autoRIF_predicted_zscore
carbohydrate_catabolic_process_(GO:0016052)	1/180	0.386669	0.419254	0.611999	0.650941	-0.590792	0.561362	tgo	GO_BP_autoRIF_predicted_zscore
establishment_of_protein_localization_to_membrane_(GO:0090150)	1/200	0.419254	0.419254	0.650941	0.650941	-0.644976	0.560663	klar	GO_BP_autoRIF_predicted_zscore
cellular_transition_metal_ion_homeostasis_(GO:0046916)	1/200	0.419254	0.419254	0.650941	0.650941	-0.644094	0.559896	CG4822	GO_BP_autoRIF_predicted_zscore
ectoderm_development_(GO:0007398)	1/200	0.419254	0.419254	0.650941	0.650941	-0.643844	0.559679	tgo	GO_BP_autoRIF_predicted_zscore
midgut_development_(GO:0007494)	1/200	0.419254	0.419254	0.650941	0.650941	-0.642966	0.558916	tgo	GO_BP_autoRIF_predicted_zscore
regulation_of_cell_growth_(GO:0001558)	1/161	0.354055	0.419254	0.571079	0.650941	-0.537884	0.558487	tgo	GO_BP_autoRIF_predicted_zscore
enzyme_linked_receptor_protein_signaling_pathway_(GO:0007167)	1/200	0.419254	0.419254	0.650941	0.650941	-0.640972	0.557183	klar	GO_BP_autoRIF_predicted_zscore
ammonium_transport_(GO:0015696)	1/200	0.419254	0.419254	0.650941	0.650941	-0.638367	0.554918	Sep4	GO_BP_autoRIF_predicted_zscore
apoptotic_cell_clearance_(GO:0043277)	1/200	0.419254	0.419254	0.650941	0.650941	-0.63279	0.55007	CG5174	GO_BP_autoRIF_predicted_zscore
regulation_of_syncytium_formation_by_plasma_membrane_fusion_(GO:0060142)	1/167	0.364534	0.419254	0.584438	0.650941	-0.543664	0.548631	Maf1	GO_BP_autoRIF_predicted_zscore
eye-antennal_disc_development_(GO:0035214)	1/200	0.419254	0.419254	0.650941	0.650941	-0.628164	0.546049	tinc	GO_BP_autoRIF_predicted_zscore
embryonic_epithelial_tube_formation_(GO:0001838)	1/200	0.419254	0.419254	0.650941	0.650941	-0.62731	0.545306	rols	GO_BP_autoRIF_predicted_zscore
histone_phosphorylation_(GO:0016572)	1/200	0.419254	0.419254	0.650941	0.650941	-0.626507	0.544609	CG3918	GO_BP_autoRIF_predicted_zscore
negative_regulation_of_BMP_signaling_pathway_(GO:0030514)	1/200	0.419254	0.419254	0.650941	0.650941	-0.624694	0.543033	tgo	GO_BP_autoRIF_predicted_zscore
positive_regulation_of_transferase_activity_(GO:0051347)	1/169	0.36799	0.419254	0.588799	0.650941	-0.541511	0.541348	tgo	GO_BP_autoRIF_predicted_zscore
intestinal_epithelial_structure_maintenance_(GO:0060729)	1/200	0.419254	0.419254	0.650941	0.650941	-0.618892	0.537989	klar	GO_BP_autoRIF_predicted_zscore
female_genitalia_development_(GO:0030540)	1/200	0.419254	0.419254	0.650941	0.650941	-0.618434	0.537591	tgo	GO_BP_autoRIF_predicted_zscore
clathrin-dependent_endocytosis_(GO:0072583)	1/200	0.419254	0.419254	0.650941	0.650941	-0.617092	0.536424	NaPi-III	GO_BP_autoRIF_predicted_zscore
histone_arginine_methylation_(GO:0034969)	1/200	0.419254	0.419254	0.650941	0.650941	-0.61695	0.536301	tgo	GO_BP_autoRIF_predicted_zscore
heart_process_(GO:0003015)	1/196	0.412876	0.419254	0.643472	0.650941	-0.606161	0.536215	tgo	GO_BP_autoRIF_predicted_zscore
determination_of_imaginal_disc_primordium_(GO:0007445)	1/200	0.419254	0.419254	0.650941	0.650941	-0.61371	0.533484	rols	GO_BP_autoRIF_predicted_zscore
regulation_of_phosphorylation_(GO:0042325)	1/171	0.371427	0.419254	0.593116	0.650941	-0.537329	0.532172	tgo	GO_BP_autoRIF_predicted_zscore
regulation_of_gene_silencing_by_RNA_(GO:0060966)	1/172	0.373139	0.419254	0.595258	0.650941	-0.538522	0.530878	tgo	GO_BP_autoRIF_predicted_zscore
protein_phosphorylation_(GO:0006468)	1/148	0.330765	0.419254	0.540677	0.650941	-0.479657	0.530667	tgo	GO_BP_autoRIF_predicted_zscore
ketone_biosynthetic_process_(GO:0042181)	1/186	0.396629	0.419254	0.624108	0.650941	-0.572141	0.52909	CG32486	GO_BP_autoRIF_predicted_zscore
female_somatic_sex_determination_(GO:0019101)	1/200	0.419254	0.419254	0.650941	0.650941	-0.608218	0.52871	tgo	GO_BP_autoRIF_predicted_zscore
defasciculation_of_motor_neuron_axon_(GO:0007415)	1/200	0.419254	0.419254	0.650941	0.650941	-0.606843	0.527515	Sep4	GO_BP_autoRIF_predicted_zscore
positive_regulation_of_secretion_by_cell_(GO:1903532)	1/160	0.352292	0.419254	0.568812	0.650941	-0.505465	0.527349	tgo	GO_BP_autoRIF_predicted_zscore
canonical_Wnt_signaling_pathway_(GO:0060070)	1/200	0.419254	0.419254	0.650941	0.650941	-0.605704	0.526525	tgo	GO_BP_autoRIF_predicted_zscore
negative_regulation_of_gene_expression_(GO:0010629)	1/200	0.419254	0.419254	0.650941	0.650941	-0.604786	0.525727	tgo	GO_BP_autoRIF_predicted_zscore
embryonic_heart_tube_development_(GO:0035050)	1/200	0.419254	0.419254	0.650941	0.650941	-0.603615	0.524709	tgo	GO_BP_autoRIF_predicted_zscore
gland_morphogenesis_(GO:0022612)	1/200	0.419254	0.419254	0.650941	0.650941	-0.603044	0.524213	tgo	GO_BP_autoRIF_predicted_zscore
JNK_cascade_(GO:0007254)	1/200	0.419254	0.419254	0.650941	0.650941	-0.601743	0.523081	klar	GO_BP_autoRIF_predicted_zscore
genital_disc_pattern_formation_(GO:0035221)	1/200	0.419254	0.419254	0.650941	0.650941	-0.601657	0.523007	rols	GO_BP_autoRIF_predicted_zscore
chorion-containing_eggshell_formation_(GO:0007304)	1/200	0.419254	0.419254	0.650941	0.650941	-0.599542	0.521169	CG2926	GO_BP_autoRIF_predicted_zscore
carboxylic_acid_transport_(GO:0046942)	1/200	0.419254	0.419254	0.650941	0.650941	-0.598819	0.52054	Sep4	GO_BP_autoRIF_predicted_zscore
mitochondrial_respiratory_chain_complex_IV_biogenesis_(GO:0097034)	1/200	0.419254	0.419254	0.650941	0.650941	-0.59675	0.518741	CG5174	GO_BP_autoRIF_predicted_zscore
inflammatory_response_(GO:0006954)	1/200	0.419254	0.419254	0.650941	0.650941	-0.595504	0.517659	CCT8	GO_BP_autoRIF_predicted_zscore
dopamine_metabolic_process_(GO:0042417)	1/200	0.419254	0.419254	0.650941	0.650941	-0.593559	0.515967	Sep4	GO_BP_autoRIF_predicted_zscore
establishment_of_epithelial_cell_apical/basal_polarity_(GO:0045198)	1/200	0.419254	0.419254	0.650941	0.650941	-0.592039	0.514646	CG2926	GO_BP_autoRIF_predicted_zscore
male_gamete_generation_(GO:0048232)	1/200	0.419254	0.419254	0.650941	0.650941	-0.591875	0.514504	tgo	GO_BP_autoRIF_predicted_zscore
establishment_of_apical/basal_cell_polarity_(GO:0035089)	1/200	0.419254	0.419254	0.650941	0.650941	-0.591665	0.514321	CG2926	GO_BP_autoRIF_predicted_zscore
glucose_transport_(GO:0015758)	1/190	0.40318	0.419254	0.631974	0.650941	-0.564274	0.512571	klar	GO_BP_autoRIF_predicted_zscore
endocrine_system_development_(GO:0035270)	1/182	0.390007	0.419254	0.616077	0.650941	-0.543518	0.511771	tgo	GO_BP_autoRIF_predicted_zscore
digestive_tract_mesoderm_development_(GO:0007502)	1/200	0.419254	0.419254	0.650941	0.650941	-0.588543	0.511607	tgo	GO_BP_autoRIF_predicted_zscore
negative_chemotaxis_(GO:0050919)	1/200	0.419254	0.419254	0.650941	0.650941	-0.58838	0.511465	tgo	GO_BP_autoRIF_predicted_zscore
basement_membrane_organization_(GO:0071711)	1/200	0.419254	0.419254	0.650941	0.650941	-0.587897	0.511046	pigs	GO_BP_autoRIF_predicted_zscore
compound_eye_development_(GO:0048749)	1/200	0.419254	0.419254	0.650941	0.650941	-0.586188	0.50956	rols	GO_BP_autoRIF_predicted_zscore
germ-band_shortening_(GO:0007390)	1/200	0.419254	0.419254	0.650941	0.650941	-0.586147	0.509525	tgo	GO_BP_autoRIF_predicted_zscore
female_mating_behavior_(GO:0060180)	1/200	0.419254	0.419254	0.650941	0.650941	-0.585218	0.508717	SK	GO_BP_autoRIF_predicted_zscore
epidermal_growth_factor_receptor_signaling_pathway_(GO:0007173)	1/200	0.419254	0.419254	0.650941	0.650941	-0.58007	0.504242	tgo	GO_BP_autoRIF_predicted_zscore
cholesterol_transport_(GO:0030301)	1/200	0.419254	0.419254	0.650941	0.650941	-0.573616	0.498632	klar	GO_BP_autoRIF_predicted_zscore
photoreceptor_cell_fate_specification_(GO:0043704)	1/182	0.390007	0.419254	0.616077	0.650941	-0.525347	0.494662	tgo	GO_BP_autoRIF_predicted_zscore
nephrocyte_differentiation_(GO:0061319)	1/200	0.419254	0.419254	0.650941	0.650941	-0.56821	0.493933	tgo	GO_BP_autoRIF_predicted_zscore
DNA_catabolic_process,_endonucleolytic_(GO:0000737)	1/200	0.419254	0.419254	0.650941	0.650941	-0.568002	0.493752	CCT8	GO_BP_autoRIF_predicted_zscore
imaginal_disc_fusion_(GO:0046528)	1/200	0.419254	0.419254	0.650941	0.650941	-0.567012	0.492891	tgo	GO_BP_autoRIF_predicted_zscore
cellular_sodium_ion_homeostasis_(GO:0006883)	1/200	0.419254	0.419254	0.650941	0.650941	-0.565409	0.491497	SK	GO_BP_autoRIF_predicted_zscore
lateral_inhibition_(GO:0046331)	1/200	0.419254	0.419254	0.650941	0.650941	-0.565073	0.491205	tgo	GO_BP_autoRIF_predicted_zscore
late_endosome_to_vacuole_transport_(GO:0045324)	1/200	0.419254	0.419254	0.650941	0.650941	-0.564369	0.490593	CG5174	GO_BP_autoRIF_predicted_zscore
larval_somatic_muscle_development_(GO:0007526)	1/200	0.419254	0.419254	0.650941	0.650941	-0.562993	0.489398	rols	GO_BP_autoRIF_predicted_zscore
glycosaminoglycan_biosynthetic_process_(GO:0006024)	1/200	0.419254	0.419254	0.650941	0.650941	-0.562131	0.488648	rols	GO_BP_autoRIF_predicted_zscore
amide_transport_(GO:0042886)	1/200	0.419254	0.419254	0.650941	0.650941	-0.560146	0.486923	Sep4	GO_BP_autoRIF_predicted_zscore
glycosaminoglycan_catabolic_process_(GO:0006027)	1/200	0.419254	0.419254	0.650941	0.650941	-0.559353	0.486233	rols	GO_BP_autoRIF_predicted_zscore
neuron_projection_fasciculation_(GO:0106030)	1/200	0.419254	0.419254	0.650941	0.650941	-0.557898	0.484969	tinc	GO_BP_autoRIF_predicted_zscore
genital_disc_development_(GO:0035215)	1/185	0.39498	0.419254	0.622116	0.650941	-0.521632	0.484554	tgo	GO_BP_autoRIF_predicted_zscore
leg_disc_pattern_formation_(GO:0035223)	1/200	0.419254	0.419254	0.650941	0.650941	-0.557408	0.484543	rols	GO_BP_autoRIF_predicted_zscore
calcium_ion_transmembrane_transport_(GO:0070588)	1/200	0.419254	0.419254	0.650941	0.650941	-0.557147	0.484315	pigs	GO_BP_autoRIF_predicted_zscore
embryonic_axis_specification_(GO:0000578)	1/200	0.419254	0.419254	0.650941	0.650941	-0.554957	0.482411	tgo	GO_BP_autoRIF_predicted_zscore
glycosaminoglycan_metabolic_process_(GO:0030203)	1/200	0.419254	0.419254	0.650941	0.650941	-0.554296	0.481837	rols	GO_BP_autoRIF_predicted_zscore
cellular_biogenic_amine_biosynthetic_process_(GO:0042401)	1/200	0.419254	0.419254	0.650941	0.650941	-0.553093	0.480791	SK	GO_BP_autoRIF_predicted_zscore
glutathione_metabolic_process_(GO:0006749)	1/200	0.419254	0.419254	0.650941	0.650941	-0.552794	0.480532	LamC	GO_BP_autoRIF_predicted_zscore
ecdysone_biosynthetic_process_(GO:0006697)	1/200	0.419254	0.419254	0.650941	0.650941	-0.551917	0.479769	klar	GO_BP_autoRIF_predicted_zscore
ecdysone_metabolic_process_(GO:0008205)	1/200	0.419254	0.419254	0.650941	0.650941	-0.548034	0.476394	klar	GO_BP_autoRIF_predicted_zscore
epidermis_development_(GO:0008544)	1/200	0.419254	0.419254	0.650941	0.650941	-0.544359	0.473199	rols	GO_BP_autoRIF_predicted_zscore
nuclear_pore_organization_(GO:0006999)	1/200	0.419254	0.419254	0.650941	0.650941	-0.544193	0.473055	CG3918	GO_BP_autoRIF_predicted_zscore
positive_regulation_of_apoptotic_process_(GO:0043065)	1/195	0.411271	0.419254	0.641581	0.650941	-0.531504	0.472242	tgo	GO_BP_autoRIF_predicted_zscore
positive_regulation_of_signal_transduction_(GO:0009967)	1/186	0.396629	0.419254	0.624108	0.650941	-0.509279	0.470958	tgo	GO_BP_autoRIF_predicted_zscore
calcium_ion_homeostasis_(GO:0055074)	1/200	0.419254	0.419254	0.650941	0.650941	-0.539858	0.469286	SK	GO_BP_autoRIF_predicted_zscore
lamellocyte_differentiation_(GO:0035171)	1/200	0.419254	0.419254	0.650941	0.650941	-0.539732	0.469177	tgo	GO_BP_autoRIF_predicted_zscore
sevenless_signaling_pathway_(GO:0045500)	1/186	0.396629	0.419254	0.624108	0.650941	-0.507342	0.469167	tgo	GO_BP_autoRIF_predicted_zscore
mitotic_DNA_integrity_checkpoint_(GO:0044774)	1/200	0.419254	0.419254	0.650941	0.650941	-0.53955	0.469018	CG3918	GO_BP_autoRIF_predicted_zscore
imaginal_disc_development_(GO:0007444)	1/200	0.419254	0.419254	0.650941	0.650941	-0.539435	0.468919	tgo	GO_BP_autoRIF_predicted_zscore
epithelium_development_(GO:0060429)	1/200	0.419254	0.419254	0.650941	0.650941	-0.537665	0.467381	klar	GO_BP_autoRIF_predicted_zscore
mRNA_metabolic_process_(GO:0016071)	1/198	0.416074	0.419254	0.647226	0.650941	-0.529595	0.464398	tgo	GO_BP_autoRIF_predicted_zscore
histoblast_morphogenesis_(GO:0007488)	1/200	0.419254	0.419254	0.650941	0.650941	-0.532944	0.463277	tgo	GO_BP_autoRIF_predicted_zscore
fibroblast_growth_factor_receptor_signaling_pathway_(GO:0008543)	1/200	0.419254	0.419254	0.650941	0.650941	-0.530355	0.461026	tgo	GO_BP_autoRIF_predicted_zscore
mesenchyme_development_(GO:0060485)	1/200	0.419254	0.419254	0.650941	0.650941	-0.530256	0.460939	tgo	GO_BP_autoRIF_predicted_zscore
decapentaplegic_signaling_pathway_(GO:0008101)	1/200	0.419254	0.419254	0.650941	0.650941	-0.528763	0.459642	tgo	GO_BP_autoRIF_predicted_zscore
detection_of_visible_light_(GO:0009584)	1/200	0.419254	0.419254	0.650941	0.650941	-0.527101	0.458198	NaPi-III	GO_BP_autoRIF_predicted_zscore
negative_regulation_of_receptor_activity_(GO:2000272)	1/200	0.419254	0.419254	0.650941	0.650941	-0.524309	0.45577	tgo	GO_BP_autoRIF_predicted_zscore
metal_ion_homeostasis_(GO:0055065)	1/200	0.419254	0.419254	0.650941	0.650941	-0.523922	0.455434	pigs	GO_BP_autoRIF_predicted_zscore
interphase_microtubule_nucleation_by_interphase_microtubule_organizing_center_(GO:0051415)	1/200	0.419254	0.419254	0.650941	0.650941	-0.522902	0.454547	CG2926	GO_BP_autoRIF_predicted_zscore
carnitine_metabolic_process_(GO:0009437)	1/200	0.419254	0.419254	0.650941	0.650941	-0.522794	0.454453	CG11151	GO_BP_autoRIF_predicted_zscore
glial_cell_migration_(GO:0008347)	1/200	0.419254	0.419254	0.650941	0.650941	-0.522521	0.454216	klar	GO_BP_autoRIF_predicted_zscore
glycogen_metabolic_process_(GO:0005977)	1/200	0.419254	0.419254	0.650941	0.650941	-0.520007	0.452031	klar	GO_BP_autoRIF_predicted_zscore
germarium-derived_oocyte_differentiation_(GO:0030706)	1/200	0.419254	0.419254	0.650941	0.650941	-0.518835	0.451012	CG2926	GO_BP_autoRIF_predicted_zscore
nucleosome_assembly_(GO:0006334)	1/200	0.419254	0.419254	0.650941	0.650941	-0.518723	0.450914	CG3918	GO_BP_autoRIF_predicted_zscore
negative_regulation_of_smoothened_signaling_pathway_(GO:0045879)	1/200	0.419254	0.419254	0.650941	0.650941	-0.518199	0.450459	tgo	GO_BP_autoRIF_predicted_zscore
tRNA_processing_(GO:0008033)	1/194	0.409661	0.419254	0.639679	0.650941	-0.4991	0.445409	CCT8	GO_BP_autoRIF_predicted_zscore
establishment_or_maintenance_of_microtubule_cytoskeleton_polarity_(GO:0030951)	1/200	0.419254	0.419254	0.650941	0.650941	-0.511313	0.444473	tgo	GO_BP_autoRIF_predicted_zscore
induction_of_programmed_cell_death_by_ecdysone_(GO:0035078)	1/198	0.416074	0.419254	0.647226	0.650941	-0.505768	0.443504	tgo	GO_BP_autoRIF_predicted_zscore
jump_response_(GO:0007630)	1/181	0.38834	0.419254	0.614043	0.650941	-0.468314	0.442965	SK	GO_BP_autoRIF_predicted_zscore
male_courtship_behavior_(GO:0008049)	1/200	0.419254	0.419254	0.650941	0.650941	-0.508794	0.442283	SK	GO_BP_autoRIF_predicted_zscore
positive_regulation_of_translation_(GO:0045727)	1/182	0.390007	0.419254	0.616077	0.650941	-0.468278	0.440926	tgo	GO_BP_autoRIF_predicted_zscore
microtubule_anchoring_(GO:0034453)	1/200	0.419254	0.419254	0.650941	0.650941	-0.502772	0.437049	CG2926	GO_BP_autoRIF_predicted_zscore
haltere_development_(GO:0007482)	1/200	0.419254	0.419254	0.650941	0.650941	-0.501346	0.435809	rols	GO_BP_autoRIF_predicted_zscore
male_genitalia_morphogenesis_(GO:0048808)	1/200	0.419254	0.419254	0.650941	0.650941	-0.49775	0.432683	tgo	GO_BP_autoRIF_predicted_zscore
mesodermal_cell_migration_(GO:0008078)	1/200	0.419254	0.419254	0.650941	0.650941	-0.497723	0.432659	tgo	GO_BP_autoRIF_predicted_zscore
establishment_of_protein_localization_to_organelle_(GO:0072594)	1/200	0.419254	0.419254	0.650941	0.650941	-0.497188	0.432194	CG11180	GO_BP_autoRIF_predicted_zscore
establishment_or_maintenance_of_cytoskeleton_polarity_involved_in_ameboidal_cell_migration_(GO:0003371)	1/200	0.419254	0.419254	0.650941	0.650941	-0.496287	0.431411	tgo	GO_BP_autoRIF_predicted_zscore
establishment_or_maintenance_of_cytoskeleton_polarity_involved_in_gastrulation_(GO:0003380)	1/200	0.419254	0.419254	0.650941	0.650941	-0.49534	0.430588	tgo	GO_BP_autoRIF_predicted_zscore
glycolipid_metabolic_process_(GO:0006664)	1/200	0.419254	0.419254	0.650941	0.650941	-0.49527	0.430527	rols	GO_BP_autoRIF_predicted_zscore
regulation_of_JUN_kinase_activity_(GO:0043506)	1/189	0.401549	0.419254	0.630023	0.650941	-0.471751	0.430438	tgo	GO_BP_autoRIF_predicted_zscore
nuclear_division_(GO:0000280)	1/200	0.419254	0.419254	0.650941	0.650941	-0.494028	0.429447	tgo	GO_BP_autoRIF_predicted_zscore
Malpighian_tubule_development_(GO:0072002)	1/200	0.419254	0.419254	0.650941	0.650941	-0.492072	0.427747	tinc	GO_BP_autoRIF_predicted_zscore
negative_regulation_of_cell_growth_(GO:0030308)	1/200	0.419254	0.419254	0.650941	0.650941	-0.492059	0.427736	tgo	GO_BP_autoRIF_predicted_zscore
glycolipid_biosynthetic_process_(GO:0009247)	1/200	0.419254	0.419254	0.650941	0.650941	-0.491053	0.426861	rols	GO_BP_autoRIF_predicted_zscore
establishment_or_maintenance_of_epithelial_cell_apical/basal_polarity_(GO:0045197)	1/200	0.419254	0.419254	0.650941	0.650941	-0.490855	0.426689	tgo	GO_BP_autoRIF_predicted_zscore
gastrulation_(GO:0007369)	1/200	0.419254	0.419254	0.650941	0.650941	-0.490608	0.426475	tgo	GO_BP_autoRIF_predicted_zscore
heparan_sulfate_proteoglycan_biosynthetic_process,_polysaccharide_chain_biosynthetic_process_(GO:0015014)	1/200	0.419254	0.419254	0.650941	0.650941	-0.49053	0.426407	rols	GO_BP_autoRIF_predicted_zscore
dorsal_closure,_elongation_of_leading_edge_cells_(GO:0007394)	1/200	0.419254	0.419254	0.650941	0.650941	-0.49038	0.426276	CG4822	GO_BP_autoRIF_predicted_zscore
neuron_projection_morphogenesis_(GO:0048812)	1/200	0.419254	0.419254	0.650941	0.650941	-0.489473	0.425488	tinc	GO_BP_autoRIF_predicted_zscore
establishment_or_maintenance_of_actin_cytoskeleton_polarity_(GO:0030950)	1/200	0.419254	0.419254	0.650941	0.650941	-0.488987	0.425066	tgo	GO_BP_autoRIF_predicted_zscore
establishment_or_maintenance_of_apical/basal_cell_polarity_(GO:0035088)	1/200	0.419254	0.419254	0.650941	0.650941	-0.488654	0.424776	tgo	GO_BP_autoRIF_predicted_zscore
citrate_transport_(GO:0015746)	1/200	0.419254	0.419254	0.650941	0.650941	-0.488259	0.424433	CG11151	GO_BP_autoRIF_predicted_zscore
nuclear_envelope_reassembly_(GO:0031468)	1/200	0.419254	0.419254	0.650941	0.650941	-0.487796	0.424031	CG3918	GO_BP_autoRIF_predicted_zscore
negative_regulation_of_protein_modification_process_(GO:0031400)	1/200	0.419254	0.419254	0.650941	0.650941	-0.487353	0.423645	tgo	GO_BP_autoRIF_predicted_zscore
asparagine_metabolic_process_(GO:0006528)	1/189	0.401549	0.419254	0.630023	0.650941	-0.463192	0.422629	CG2926	GO_BP_autoRIF_predicted_zscore
pole_cell_migration_(GO:0007280)	1/200	0.419254	0.419254	0.650941	0.650941	-0.484903	0.421516	tgo	GO_BP_autoRIF_predicted_zscore
nuclear_export_(GO:0051168)	1/200	0.419254	0.419254	0.650941	0.650941	-0.483575	0.420361	CG3918	GO_BP_autoRIF_predicted_zscore
negative_regulation_of_post-embryonic_development_(GO:0048581)	1/200	0.419254	0.419254	0.650941	0.650941	-0.48304	0.419896	tgo	GO_BP_autoRIF_predicted_zscore
imaginal_disc_pattern_formation_(GO:0007447)	1/200	0.419254	0.419254	0.650941	0.650941	-0.477332	0.414934	tgo	GO_BP_autoRIF_predicted_zscore
organic_cation_transport_(GO:0015695)	1/200	0.419254	0.419254	0.650941	0.650941	-0.477023	0.414666	pigs	GO_BP_autoRIF_predicted_zscore
larval_central_nervous_system_remodeling_(GO:0035193)	1/200	0.419254	0.419254	0.650941	0.650941	-0.476044	0.413815	tinc	GO_BP_autoRIF_predicted_zscore
neuron_maturation_(GO:0042551)	1/200	0.419254	0.419254	0.650941	0.650941	-0.474421	0.412404	tinc	GO_BP_autoRIF_predicted_zscore
glutamate_catabolic_process_(GO:0006538)	1/200	0.419254	0.419254	0.650941	0.650941	-0.474217	0.412226	Sep4	GO_BP_autoRIF_predicted_zscore
glutamate_biosynthetic_process_(GO:0006537)	1/200	0.419254	0.419254	0.650941	0.650941	-0.470165	0.408704	Sep4	GO_BP_autoRIF_predicted_zscore
heparan_sulfate_proteoglycan_biosynthetic_process_(GO:0015012)	1/200	0.419254	0.419254	0.650941	0.650941	-0.46806	0.406874	tgo	GO_BP_autoRIF_predicted_zscore
negative_regulation_of_transcription_from_RNA_polymerase_II_promoter_(GO:0000122)	1/200	0.419254	0.419254	0.650941	0.650941	-0.46794	0.40677	tgo	GO_BP_autoRIF_predicted_zscore
heparan_sulfate_proteoglycan_metabolic_process_(GO:0030201)	1/200	0.419254	0.419254	0.650941	0.650941	-0.467745	0.406601	tgo	GO_BP_autoRIF_predicted_zscore
glutamate_metabolic_process_(GO:0006536)	1/200	0.419254	0.419254	0.650941	0.650941	-0.466645	0.405644	Sep4	GO_BP_autoRIF_predicted_zscore
negative_regulation_of_canonical_Wnt_signaling_pathway_(GO:0090090)	1/200	0.419254	0.419254	0.650941	0.650941	-0.464355	0.403654	tgo	GO_BP_autoRIF_predicted_zscore
neurogenesis_(GO:0022008)	1/200	0.419254	0.419254	0.650941	0.650941	-0.464106	0.403437	tgo	GO_BP_autoRIF_predicted_zscore
quinone_biosynthetic_process_(GO:1901663)	1/180	0.386669	0.419254	0.611999	0.650941	-0.423669	0.402564	rols	GO_BP_autoRIF_predicted_zscore
JAK-STAT_cascade_(GO:0007259)	1/200	0.419254	0.419254	0.650941	0.650941	-0.462196	0.401777	tgo	GO_BP_autoRIF_predicted_zscore
embryonic_hindgut_morphogenesis_(GO:0048619)	1/200	0.419254	0.419254	0.650941	0.650941	-0.461065	0.400794	tgo	GO_BP_autoRIF_predicted_zscore
imaginal_disc_morphogenesis_(GO:0007560)	1/200	0.419254	0.419254	0.650941	0.650941	-0.460821	0.400582	rols	GO_BP_autoRIF_predicted_zscore
muscle_organ_development_(GO:0007517)	1/200	0.419254	0.419254	0.650941	0.650941	-0.458992	0.398992	tinc	GO_BP_autoRIF_predicted_zscore
regulation_of_protein_serine/threonine_kinase_activity_(GO:0071900)	1/192	0.406429	0.419254	0.635847	0.650941	-0.442824	0.398695	tgo	GO_BP_autoRIF_predicted_zscore
nuclear_envelope_organization_(GO:0006998)	1/200	0.419254	0.419254	0.650941	0.650941	-0.457842	0.397992	CG3918	GO_BP_autoRIF_predicted_zscore
intracellular_steroid_hormone_receptor_signaling_pathway_(GO:0030518)	1/200	0.419254	0.419254	0.650941	0.650941	-0.457534	0.397724	klar	GO_BP_autoRIF_predicted_zscore
establishment_of_planar_polarity_(GO:0001736)	1/200	0.419254	0.419254	0.650941	0.650941	-0.457011	0.397269	tgo	GO_BP_autoRIF_predicted_zscore
maintenance_of_gastrointestinal_epithelium_(GO:0030277)	1/200	0.419254	0.419254	0.650941	0.650941	-0.446716	0.388321	rols	GO_BP_autoRIF_predicted_zscore
regulation_of_DNA_binding_(GO:0051101)	1/179	0.384994	0.419254	0.609944	0.650941	-0.406574	0.388086	tgo	GO_BP_autoRIF_predicted_zscore
multivesicular_body_sorting_pathway_(GO:0071985)	1/200	0.419254	0.419254	0.650941	0.650941	-0.443958	0.385923	rols	GO_BP_autoRIF_predicted_zscore
regulation_of_lamellipodium_assembly_(GO:0010591)	1/187	0.398273	0.419254	0.62609	0.650941	-0.416898	0.383803	tgo	GO_BP_autoRIF_predicted_zscore
neuron_development_(GO:0048666)	1/200	0.419254	0.419254	0.650941	0.650941	-0.440725	0.383113	tinc	GO_BP_autoRIF_predicted_zscore
male_mating_behavior_(GO:0060179)	1/200	0.419254	0.419254	0.650941	0.650941	-0.437764	0.380539	SK	GO_BP_autoRIF_predicted_zscore
epithelial_cell_development_(GO:0002064)	1/200	0.419254	0.419254	0.650941	0.650941	-0.435112	0.378233	klar	GO_BP_autoRIF_predicted_zscore
negative_regulation_of_axon_extension_(GO:0030517)	1/200	0.419254	0.419254	0.650941	0.650941	-0.434644	0.377826	CCT8	GO_BP_autoRIF_predicted_zscore
iron_ion_homeostasis_(GO:0055072)	1/200	0.419254	0.419254	0.650941	0.650941	-0.43456	0.377753	MtnB	GO_BP_autoRIF_predicted_zscore
hippo_signaling_(GO:0035329)	1/200	0.419254	0.419254	0.650941	0.650941	-0.433935	0.37721	CG2926	GO_BP_autoRIF_predicted_zscore
nervous_system_development_(GO:0007399)	1/200	0.419254	0.419254	0.650941	0.650941	-0.432817	0.376238	tinc	GO_BP_autoRIF_predicted_zscore
positive_regulation_of_photoreceptor_cell_differentiation_(GO:0046534)	1/168	0.366264	0.419254	0.586624	0.650941	-0.373823	0.375468	tgo	GO_BP_autoRIF_predicted_zscore
negative_regulation_of_cell_communication_(GO:0010648)	1/200	0.419254	0.419254	0.650941	0.650941	-0.431359	0.374971	tgo	GO_BP_autoRIF_predicted_zscore
mitochondrial_respiratory_chain_complex_I_assembly_(GO:0032981)	1/200	0.419254	0.419254	0.650941	0.650941	-0.429858	0.373666	rogdi	GO_BP_autoRIF_predicted_zscore
negative_regulation_of_endopeptidase_activity_(GO:0010951)	1/200	0.419254	0.419254	0.650941	0.650941	-0.428225	0.372246	tgo	GO_BP_autoRIF_predicted_zscore
glutamate_receptor_clustering_(GO:0097688)	1/200	0.419254	0.419254	0.650941	0.650941	-0.427871	0.371939	SK	GO_BP_autoRIF_predicted_zscore
positive_regulation_of_cellular_biosynthetic_process_(GO:0031328)	1/195	0.411271	0.419254	0.641581	0.650941	-0.417435	0.370892	tgo	GO_BP_autoRIF_predicted_zscore
regulation_of_filopodium_assembly_(GO:0051489)	1/187	0.398273	0.419254	0.62609	0.650941	-0.402628	0.370666	tgo	GO_BP_autoRIF_predicted_zscore
cation_homeostasis_(GO:0055080)	1/200	0.419254	0.419254	0.650941	0.650941	-0.425884	0.370212	Sep4	GO_BP_autoRIF_predicted_zscore
peptide_catabolic_process_(GO:0043171)	1/200	0.419254	0.419254	0.650941	0.650941	-0.422989	0.367695	tinc	GO_BP_autoRIF_predicted_zscore
negative_regulation_of_cell_development_(GO:0010721)	1/200	0.419254	0.419254	0.650941	0.650941	-0.421329	0.366252	tgo	GO_BP_autoRIF_predicted_zscore
mitotic_recombination_(GO:0006312)	1/200	0.419254	0.419254	0.650941	0.650941	-0.420942	0.365915	CG3918	GO_BP_autoRIF_predicted_zscore
peptide_metabolic_process_(GO:0006518)	1/200	0.419254	0.419254	0.650941	0.650941	-0.417182	0.362647	tinc	GO_BP_autoRIF_predicted_zscore
mesectoderm_development_(GO:0048383)	1/200	0.419254	0.419254	0.650941	0.650941	-0.416425	0.361989	tgo	GO_BP_autoRIF_predicted_zscore
glycolytic_process_(GO:0006096)	1/188	0.399913	0.419254	0.628061	0.650941	-0.393517	0.360662	klar	GO_BP_autoRIF_predicted_zscore
negative_regulation_of_protein_serine/threonine_kinase_activity_(GO:0071901)	1/200	0.419254	0.419254	0.650941	0.650941	-0.412911	0.358934	tgo	GO_BP_autoRIF_predicted_zscore
positive_regulation_of_cellular_catabolic_process_(GO:0031331)	1/195	0.411271	0.419254	0.641581	0.650941	-0.40346	0.358476	tgo	GO_BP_autoRIF_predicted_zscore
pericardial_nephrocyte_differentiation_(GO:0061320)	1/200	0.419254	0.419254	0.650941	0.650941	-0.408948	0.355489	tgo	GO_BP_autoRIF_predicted_zscore
negative_regulation_of_cell_fate_specification_(GO:0009996)	1/200	0.419254	0.419254	0.650941	0.650941	-0.406755	0.353583	tgo	GO_BP_autoRIF_predicted_zscore
eye_morphogenesis_(GO:0048592)	1/200	0.419254	0.419254	0.650941	0.650941	-0.404841	0.351919	rols	GO_BP_autoRIF_predicted_zscore
negative_regulation_of_cellular_protein_metabolic_process_(GO:0032269)	1/200	0.419254	0.419254	0.650941	0.650941	-0.403872	0.351077	tgo	GO_BP_autoRIF_predicted_zscore
negative_regulation_of_DNA_replication_(GO:0008156)	1/200	0.419254	0.419254	0.650941	0.650941	-0.402209	0.349631	CG3918	GO_BP_autoRIF_predicted_zscore
histone_H3-K9_modification_(GO:0061647)	1/200	0.419254	0.419254	0.650941	0.650941	-0.399815	0.347551	CG3918	GO_BP_autoRIF_predicted_zscore
hypoxanthine_biosynthetic_process_(GO:0046101)	1/200	0.419254	0.419254	0.650941	0.650941	-0.397298	0.345362	CG5174	GO_BP_autoRIF_predicted_zscore
regulation_of_stem_cell_proliferation_(GO:0072091)	1/179	0.384994	0.419254	0.609944	0.650941	-0.359107	0.342778	tgo	GO_BP_autoRIF_predicted_zscore
neuron_projection_development_(GO:0031175)	1/200	0.419254	0.419254	0.650941	0.650941	-0.392517	0.341207	tinc	GO_BP_autoRIF_predicted_zscore
positive_regulation_of_cell_development_(GO:0010720)	1/194	0.409661	0.419254	0.639679	0.650941	-0.380043	0.339159	tgo	GO_BP_autoRIF_predicted_zscore
instar_larval_development_(GO:0002168)	1/200	0.419254	0.419254	0.650941	0.650941	-0.387484	0.336831	rols	GO_BP_autoRIF_predicted_zscore
muscle_tissue_development_(GO:0060537)	1/200	0.419254	0.419254	0.650941	0.650941	-0.386671	0.336125	tgo	GO_BP_autoRIF_predicted_zscore
calcium_ion_transport_(GO:0006816)	1/200	0.419254	0.419254	0.650941	0.650941	-0.385498	0.335105	SK	GO_BP_autoRIF_predicted_zscore
protein_localization_to_cell_surface_(GO:0034394)	1/187	0.398273	0.419254	0.62609	0.650941	-0.363777	0.334899	klar	GO_BP_autoRIF_predicted_zscore
morphogenesis_of_larval_imaginal_disc_epithelium_(GO:0016335)	1/200	0.419254	0.419254	0.650941	0.650941	-0.384495	0.334233	tgo	GO_BP_autoRIF_predicted_zscore
nucleus_organization_(GO:0006997)	1/200	0.419254	0.419254	0.650941	0.650941	-0.38341	0.33329	CG3918	GO_BP_autoRIF_predicted_zscore
Golgi_to_vacuole_transport_(GO:0006896)	1/200	0.419254	0.419254	0.650941	0.650941	-0.382782	0.332744	CG5174	GO_BP_autoRIF_predicted_zscore
morphogenesis_of_follicular_epithelium_(GO:0016333)	1/200	0.419254	0.419254	0.650941	0.650941	-0.382607	0.332592	klar	GO_BP_autoRIF_predicted_zscore
mesodermal_cell_fate_determination_(GO:0007500)	1/200	0.419254	0.419254	0.650941	0.650941	-0.381477	0.331609	tgo	GO_BP_autoRIF_predicted_zscore
negative_regulation_of_response_to_stimulus_(GO:0048585)	1/200	0.419254	0.419254	0.650941	0.650941	-0.381067	0.331253	pigs	GO_BP_autoRIF_predicted_zscore
negative_regulation_of_neural_precursor_cell_proliferation_(GO:2000178)	1/200	0.419254	0.419254	0.650941	0.650941	-0.380838	0.331054	klar	GO_BP_autoRIF_predicted_zscore
negative_regulation_of_developmental_process_(GO:0051093)	1/200	0.419254	0.419254	0.650941	0.650941	-0.378896	0.329366	tgo	GO_BP_autoRIF_predicted_zscore
mesoderm_development_(GO:0007498)	1/200	0.419254	0.419254	0.650941	0.650941	-0.375225	0.326174	tgo	GO_BP_autoRIF_predicted_zscore
cellular_response_to_glucose_starvation_(GO:0042149)	1/200	0.419254	0.419254	0.650941	0.650941	-0.373907	0.325029	Sep4	GO_BP_autoRIF_predicted_zscore
gland_development_(GO:0048732)	1/187	0.398273	0.419254	0.62609	0.650941	-0.348965	0.321263	tgo	GO_BP_autoRIF_predicted_zscore
peripheral_nervous_system_neuron_development_(GO:0048935)	1/200	0.419254	0.419254	0.650941	0.650941	-0.369109	0.320858	tinc	GO_BP_autoRIF_predicted_zscore
mesodermal_cell_differentiation_(GO:0048333)	1/200	0.419254	0.419254	0.650941	0.650941	-0.367219	0.319216	tinc	GO_BP_autoRIF_predicted_zscore
protein_import_(GO:0017038)	1/198	0.416074	0.419254	0.647226	0.650941	-0.36338	0.318646	tgo	GO_BP_autoRIF_predicted_zscore
positive_regulation_of_cell_death_(GO:0010942)	1/189	0.401549	0.419254	0.630023	0.650941	-0.347934	0.317464	tgo	GO_BP_autoRIF_predicted_zscore
negative_regulation_of_nervous_system_development_(GO:0051961)	1/200	0.419254	0.419254	0.650941	0.650941	-0.36487	0.317173	tgo	GO_BP_autoRIF_predicted_zscore
negative_regulation_of_protein_tyrosine_kinase_activity_(GO:0061099)	1/200	0.419254	0.419254	0.650941	0.650941	-0.363672	0.316132	CG2926	GO_BP_autoRIF_predicted_zscore
negative_regulation_of_cellular_catabolic_process_(GO:0031330)	1/200	0.419254	0.419254	0.650941	0.650941	-0.362319	0.314956	tgo	GO_BP_autoRIF_predicted_zscore
nucleosome_mobilization_(GO:0042766)	1/200	0.419254	0.419254	0.650941	0.650941	-0.360762	0.313603	CG3918	GO_BP_autoRIF_predicted_zscore
heterocycle_biosynthetic_process_(GO:0018130)	1/200	0.419254	0.419254	0.650941	0.650941	-0.359673	0.312656	SK	GO_BP_autoRIF_predicted_zscore
negative_regulation_of_stem_cell_differentiation_(GO:2000737)	1/200	0.419254	0.419254	0.650941	0.650941	-0.358126	0.311311	tgo	GO_BP_autoRIF_predicted_zscore
nuclear_mRNA_surveillance_(GO:0071028)	1/200	0.419254	0.419254	0.650941	0.650941	-0.357609	0.310861	CG3918	GO_BP_autoRIF_predicted_zscore
energy_reserve_metabolic_process_(GO:0006112)	1/200	0.419254	0.419254	0.650941	0.650941	-0.357375	0.310658	Drak	GO_BP_autoRIF_predicted_zscore
positive_regulation_of_ATPase_activity_(GO:0032781)	1/200	0.419254	0.419254	0.650941	0.650941	-0.350804	0.304946	tgo	GO_BP_autoRIF_predicted_zscore
neuromuscular_junction_development_(GO:0007528)	1/200	0.419254	0.419254	0.650941	0.650941	-0.350171	0.304396	tinc	GO_BP_autoRIF_predicted_zscore
membrane_protein_ectodomain_proteolysis_(GO:0006509)	1/200	0.419254	0.419254	0.650941	0.650941	-0.340773	0.296226	CG4822	GO_BP_autoRIF_predicted_zscore
regulation_of_peptidase_activity_(GO:0052547)	1/192	0.406429	0.419254	0.635847	0.650941	-0.327859	0.295186	tgo	GO_BP_autoRIF_predicted_zscore
photoreceptor_cell_axon_guidance_(GO:0072499)	1/200	0.419254	0.419254	0.650941	0.650941	-0.335834	0.291933	klar	GO_BP_autoRIF_predicted_zscore
neural_crest_cell_development_(GO:0014032)	1/200	0.419254	0.419254	0.650941	0.650941	-0.335167	0.291353	tgo	GO_BP_autoRIF_predicted_zscore
endomitotic_cell_cycle_(GO:0007113)	1/200	0.419254	0.419254	0.650941	0.650941	-0.33386	0.290217	CG1677	GO_BP_autoRIF_predicted_zscore
negative_regulation_of_proteasomal_protein_catabolic_process_(GO:1901799)	1/200	0.419254	0.419254	0.650941	0.650941	-0.332444	0.288986	tgo	GO_BP_autoRIF_predicted_zscore
oocyte_development_(GO:0048599)	1/200	0.419254	0.419254	0.650941	0.650941	-0.331509	0.288174	CG2926	GO_BP_autoRIF_predicted_zscore
cGMP-mediated_signaling_(GO:0019934)	1/200	0.419254	0.419254	0.650941	0.650941	-0.330101	0.286949	SK	GO_BP_autoRIF_predicted_zscore
neuroepithelial_cell_differentiation_(GO:0060563)	1/200	0.419254	0.419254	0.650941	0.650941	-0.328227	0.28532	tgo	GO_BP_autoRIF_predicted_zscore
negative_regulation_of_peptidase_activity_(GO:0010466)	1/200	0.419254	0.419254	0.650941	0.650941	-0.325647	0.283078	tgo	GO_BP_autoRIF_predicted_zscore
notum_cell_fate_specification_(GO:0035310)	1/200	0.419254	0.419254	0.650941	0.650941	-0.324966	0.282486	tgo	GO_BP_autoRIF_predicted_zscore
microvillus_organization_(GO:0032528)	1/200	0.419254	0.419254	0.650941	0.650941	-0.323686	0.281373	pigs	GO_BP_autoRIF_predicted_zscore
negative_regulation_of_histone_methylation_(GO:0031061)	1/200	0.419254	0.419254	0.650941	0.650941	-0.316442	0.275076	CG3918	GO_BP_autoRIF_predicted_zscore
perineurial_glial_growth_(GO:0042066)	1/200	0.419254	0.419254	0.650941	0.650941	-0.315738	0.274464	klar	GO_BP_autoRIF_predicted_zscore
positive_regulation_of_fibroblast_growth_factor_receptor_signaling_pathway_(GO:0045743)	1/195	0.411271	0.419254	0.641581	0.650941	-0.30651	0.272335	tgo	GO_BP_autoRIF_predicted_zscore
neuroblast_division_(GO:0055057)	1/200	0.419254	0.419254	0.650941	0.650941	-0.300662	0.261359	tgo	GO_BP_autoRIF_predicted_zscore
negative_regulation_of_cell_morphogenesis_involved_in_differentiation_(GO:0010771)	1/200	0.419254	0.419254	0.650941	0.650941	-0.300601	0.261306	klar	GO_BP_autoRIF_predicted_zscore
nucleotide_biosynthetic_process_(GO:0009165)	1/200	0.419254	0.419254	0.650941	0.650941	-0.297327	0.25846	tgo	GO_BP_autoRIF_predicted_zscore
neuroblast_fate_determination_(GO:0007400)	1/200	0.419254	0.419254	0.650941	0.650941	-0.294698	0.256174	tgo	GO_BP_autoRIF_predicted_zscore
negative_regulation_of_transcription_elongation_from_RNA_polymerase_II_promoter_(GO:0034244)	1/200	0.419254	0.419254	0.650941	0.650941	-0.294584	0.256075	tgo	GO_BP_autoRIF_predicted_zscore
photoreceptor_cell_development_(GO:0042461)	1/200	0.419254	0.419254	0.650941	0.650941	-0.293508	0.25514	tinc	GO_BP_autoRIF_predicted_zscore
morphogenesis_of_embryonic_epithelium_(GO:0016331)	1/200	0.419254	0.419254	0.650941	0.650941	-0.288087	0.250428	rols	GO_BP_autoRIF_predicted_zscore
nucleotide_metabolic_process_(GO:0009117)	1/200	0.419254	0.419254	0.650941	0.650941	-0.287394	0.249825	tgo	GO_BP_autoRIF_predicted_zscore
negative_regulation_of_nucleocytoplasmic_transport_(GO:0046823)	1/200	0.419254	0.419254	0.650941	0.650941	-0.287113	0.249581	CG1677	GO_BP_autoRIF_predicted_zscore
open_tracheal_system_development_(GO:0007424)	1/200	0.419254	0.419254	0.650941	0.650941	-0.285897	0.248524	rols	GO_BP_autoRIF_predicted_zscore
N-terminal_protein_amino_acid_modification_(GO:0031365)	1/200	0.419254	0.419254	0.650941	0.650941	-0.284379	0.247204	tgo	GO_BP_autoRIF_predicted_zscore
neuropeptide_signaling_pathway_(GO:0007218)	1/200	0.419254	0.419254	0.650941	0.650941	-0.283702	0.246616	Sep4	GO_BP_autoRIF_predicted_zscore
leg_disc_morphogenesis_(GO:0007478)	1/200	0.419254	0.419254	0.650941	0.650941	-0.283336	0.246298	rols	GO_BP_autoRIF_predicted_zscore
peripheral_nervous_system_development_(GO:0007422)	1/200	0.419254	0.419254	0.650941	0.650941	-0.282242	0.245347	tinc	GO_BP_autoRIF_predicted_zscore
Notch_signaling_pathway_(GO:0007219)	1/200	0.419254	0.419254	0.650941	0.650941	-0.280826	0.244116	tgo	GO_BP_autoRIF_predicted_zscore
negative_regulation_of_DNA_metabolic_process_(GO:0051053)	1/200	0.419254	0.419254	0.650941	0.650941	-0.280058	0.243448	tgo	GO_BP_autoRIF_predicted_zscore
negative_regulation_of_neuron_death_(GO:1901215)	1/200	0.419254	0.419254	0.650941	0.650941	-0.279301	0.24279	tinc	GO_BP_autoRIF_predicted_zscore
muscle_cell_fate_determination_(GO:0007521)	1/200	0.419254	0.419254	0.650941	0.650941	-0.276535	0.240385	tgo	GO_BP_autoRIF_predicted_zscore
male_germ-line_stem_cell_population_maintenance_(GO:0036098)	1/200	0.419254	0.419254	0.650941	0.650941	-0.274724	0.238811	rols	GO_BP_autoRIF_predicted_zscore
negative_regulation_of_lamellocyte_differentiation_(GO:0035204)	1/200	0.419254	0.419254	0.650941	0.650941	-0.273753	0.237968	CG2926	GO_BP_autoRIF_predicted_zscore
toll-like_receptor_signaling_pathway_(GO:0002224)	1/187	0.398273	0.419254	0.62609	0.650941	-0.253127	0.233033	l(3)05822	GO_BP_autoRIF_predicted_zscore
neuron_differentiation_(GO:0030182)	1/200	0.419254	0.419254	0.650941	0.650941	-0.267195	0.232267	tinc	GO_BP_autoRIF_predicted_zscore
eclosion_rhythm_(GO:0008062)	1/200	0.419254	0.419254	0.650941	0.650941	-0.265858	0.231104	SK	GO_BP_autoRIF_predicted_zscore
poly(A)+_mRNA_export_from_nucleus_(GO:0016973)	1/200	0.419254	0.419254	0.650941	0.650941	-0.264324	0.229771	CG3918	GO_BP_autoRIF_predicted_zscore
mesoderm_morphogenesis_(GO:0048332)	1/200	0.419254	0.419254	0.650941	0.650941	-0.263683	0.229214	tgo	GO_BP_autoRIF_predicted_zscore
negative_regulation_of_stem_cell_proliferation_(GO:2000647)	1/200	0.419254	0.419254	0.650941	0.650941	-0.259393	0.225484	tgo	GO_BP_autoRIF_predicted_zscore
negative_regulation_of_neurogenesis_(GO:0050768)	1/200	0.419254	0.419254	0.650941	0.650941	-0.258087	0.224349	tgo	GO_BP_autoRIF_predicted_zscore
organophosphate_biosynthetic_process_(GO:0090407)	1/200	0.419254	0.419254	0.650941	0.650941	-0.257497	0.223836	CG11151	GO_BP_autoRIF_predicted_zscore
positive_regulation_of_chromatin_assembly_or_disassembly_(GO:0045799)	1/200	0.419254	0.419254	0.650941	0.650941	-0.257156	0.22354	tgo	GO_BP_autoRIF_predicted_zscore
negative_regulation_of_hormone_secretion_(GO:0046888)	1/200	0.419254	0.419254	0.650941	0.650941	-0.253679	0.220518	tgo	GO_BP_autoRIF_predicted_zscore
mitotic_metaphase_plate_congression_(GO:0007080)	1/200	0.419254	0.419254	0.650941	0.650941	-0.250632	0.217869	CG2926	GO_BP_autoRIF_predicted_zscore
muscle_cell_fate_specification_(GO:0042694)	1/200	0.419254	0.419254	0.650941	0.650941	-0.240775	0.2093	tgo	GO_BP_autoRIF_predicted_zscore
female_germ-line_cyst_encapsulation_(GO:0048139)	1/200	0.419254	0.419254	0.650941	0.650941	-0.231333	0.201092	Drak	GO_BP_autoRIF_predicted_zscore
positive_regulation_of_BMP_signaling_pathway_(GO:0030513)	1/200	0.419254	0.419254	0.650941	0.650941	-0.226141	0.196579	rols	GO_BP_autoRIF_predicted_zscore
negative_regulation_of_imaginal_disc_growth_(GO:0045571)	1/200	0.419254	0.419254	0.650941	0.650941	-0.225455	0.195983	tgo	GO_BP_autoRIF_predicted_zscore
L-amino_acid_transport_(GO:0015807)	1/200	0.419254	0.419254	0.650941	0.650941	-0.220835	0.191967	SK	GO_BP_autoRIF_predicted_zscore
negative_regulation_of_neuron_differentiation_(GO:0045665)	1/200	0.419254	0.419254	0.650941	0.650941	-0.218656	0.190073	tgo	GO_BP_autoRIF_predicted_zscore
nonassociative_learning_(GO:0046958)	1/200	0.419254	0.419254	0.650941	0.650941	-0.217214	0.188819	SK	GO_BP_autoRIF_predicted_zscore
negative_regulation_of_decapentaplegic_signaling_pathway_(GO:0090099)	1/200	0.419254	0.419254	0.650941	0.650941	-0.21694	0.188581	tgo	GO_BP_autoRIF_predicted_zscore
negative_regulation_of_multicellular_organismal_process_(GO:0051241)	1/200	0.419254	0.419254	0.650941	0.650941	-0.216037	0.187796	CG5174	GO_BP_autoRIF_predicted_zscore
nephrocyte_filtration_(GO:0097206)	1/200	0.419254	0.419254	0.650941	0.650941	-0.215544	0.187368	CG5174	GO_BP_autoRIF_predicted_zscore
negative_regulation_of_cell_differentiation_(GO:0045596)	1/200	0.419254	0.419254	0.650941	0.650941	-0.213154	0.18529	tgo	GO_BP_autoRIF_predicted_zscore
zonula_adherens_assembly_(GO:0045186)	1/200	0.419254	0.419254	0.650941	0.650941	-0.204125	0.177441	klar	GO_BP_autoRIF_predicted_zscore
negative_regulation_of_proteolysis_(GO:0045861)	1/200	0.419254	0.419254	0.650941	0.650941	-0.194	0.16864	tgo	GO_BP_autoRIF_predicted_zscore
positive_regulation_of_hemocyte_proliferation_(GO:0035208)	1/200	0.419254	0.419254	0.650941	0.650941	-0.191498	0.166465	CG3918	GO_BP_autoRIF_predicted_zscore
regulation_of_epidermal_growth_factor_receptor_signaling_pathway_(GO:0042058)	1/189	0.401549	0.419254	0.630023	0.650941	-0.178618	0.162976	tgo	GO_BP_autoRIF_predicted_zscore
positive_regulation_of_neuromuscular_junction_development_(GO:1904398)	1/200	0.419254	0.419254	0.650941	0.650941	-0.187374	0.16288	rols	GO_BP_autoRIF_predicted_zscore
neuroendocrine_cell_differentiation_(GO:0061101)	1/200	0.419254	0.419254	0.650941	0.650941	-0.186184	0.161846	tgo	GO_BP_autoRIF_predicted_zscore
neuron_fate_commitment_(GO:0048663)	1/200	0.419254	0.419254	0.650941	0.650941	-0.185051	0.160861	rols	GO_BP_autoRIF_predicted_zscore
positive_regulation_of_chromatin_silencing_(GO:0031937)	1/200	0.419254	0.419254	0.650941	0.650941	-0.183551	0.159557	CG3918	GO_BP_autoRIF_predicted_zscore
neurotransmitter_transport_(GO:0006836)	1/200	0.419254	0.419254	0.650941	0.650941	-0.17719	0.154027	Sep4	GO_BP_autoRIF_predicted_zscore
torso_signaling_pathway_(GO:0008293)	1/174	0.376549	0.419254	0.599508	0.650941	-0.152412	0.148862	tgo	GO_BP_autoRIF_predicted_zscore
neuron_fate_specification_(GO:0048665)	1/200	0.419254	0.419254	0.650941	0.650941	-0.170359	0.148089	tgo	GO_BP_autoRIF_predicted_zscore
germarium-derived_female_germ-line_cyst_encapsulation_(GO:0030708)	1/200	0.419254	0.419254	0.650941	0.650941	-0.166434	0.144677	Drak	GO_BP_autoRIF_predicted_zscore
positive_regulation_of_antifungal_peptide_biosynthetic_process_(GO:0006967)	1/200	0.419254	0.419254	0.650941	0.650941	-0.166413	0.144659	CG4822	GO_BP_autoRIF_predicted_zscore
negative_regulation_of_glial_cell_proliferation_(GO:0060253)	1/200	0.419254	0.419254	0.650941	0.650941	-0.165571	0.143927	CG11180	GO_BP_autoRIF_predicted_zscore
organelle_transport_along_microtubule_(GO:0072384)	1/200	0.419254	0.419254	0.650941	0.650941	-0.165561	0.143918	CG2926	GO_BP_autoRIF_predicted_zscore
notum_morphogenesis_(GO:0048802)	1/200	0.419254	0.419254	0.650941	0.650941	-0.164273	0.142799	tgo	GO_BP_autoRIF_predicted_zscore
negative_regulation_of_protein_depolymerization_(GO:1901880)	1/200	0.419254	0.419254	0.650941	0.650941	-0.161629	0.1405	CG5174	GO_BP_autoRIF_predicted_zscore
outer_dynein_arm_assembly_(GO:0036158)	1/200	0.419254	0.419254	0.650941	0.650941	-0.16004	0.139119	CCT8	GO_BP_autoRIF_predicted_zscore
positive_regulation_of_axon_guidance_(GO:1902669)	1/200	0.419254	0.419254	0.650941	0.650941	-0.159395	0.138558	tinc	GO_BP_autoRIF_predicted_zscore
protein_modification_process_(GO:0036211)	1/197	0.414477	0.419254	0.645354	0.650941	-0.152728	0.134513	tgo	GO_BP_autoRIF_predicted_zscore
positive_regulation_of_cyclin-dependent_protein_kinase_activity_(GO:1904031)	1/200	0.419254	0.419254	0.650941	0.650941	-0.154531	0.13433	tgo	GO_BP_autoRIF_predicted_zscore
positive_regulation_of_NF-kappaB_transcription_factor_activity_(GO:0051092)	1/200	0.419254	0.419254	0.650941	0.650941	-0.148192	0.12882	CG3918	GO_BP_autoRIF_predicted_zscore
neuroblast_development_(GO:0014019)	1/200	0.419254	0.419254	0.650941	0.650941	-0.146399	0.127262	tgo	GO_BP_autoRIF_predicted_zscore
Notch_receptor_processing_(GO:0007220)	1/200	0.419254	0.419254	0.650941	0.650941	-0.130446	0.113394	rols	GO_BP_autoRIF_predicted_zscore
negative_regulation_of_synaptic_transmission_(GO:0050805)	1/200	0.419254	0.419254	0.650941	0.650941	-0.130155	0.113141	Sep4	GO_BP_autoRIF_predicted_zscore
ion_transport_(GO:0006811)	1/200	0.419254	0.419254	0.650941	0.650941	-0.130004	0.11301	SK	GO_BP_autoRIF_predicted_zscore
positive_regulation_of_hh_target_transcription_factor_activity_(GO:0007228)	1/200	0.419254	0.419254	0.650941	0.650941	-0.123939	0.107737	tgo	GO_BP_autoRIF_predicted_zscore
oligosaccharide_biosynthetic_process_(GO:0009312)	1/200	0.419254	0.419254	0.650941	0.650941	-0.116537	0.101303	Sep4	GO_BP_autoRIF_predicted_zscore
oligosaccharide_catabolic_process_(GO:0009313)	1/200	0.419254	0.419254	0.650941	0.650941	-0.112127	0.0974694	Sep4	GO_BP_autoRIF_predicted_zscore
R8_cell_development_(GO:0045463)	1/200	0.419254	0.419254	0.650941	0.650941	-0.108826	0.0945997	tinc	GO_BP_autoRIF_predicted_zscore
positive_regulation_of_feeding_behavior_(GO:2000253)	1/200	0.419254	0.419254	0.650941	0.650941	-0.105974	0.0921211	Drak	GO_BP_autoRIF_predicted_zscore
oligosaccharide_metabolic_process_(GO:0009311)	1/200	0.419254	0.419254	0.650941	0.650941	-0.10495	0.0912309	Sep4	GO_BP_autoRIF_predicted_zscore
plasma_membrane_tubulation_(GO:0097320)	1/200	0.419254	0.419254	0.650941	0.650941	-0.0912389	0.079312	pigs	GO_BP_autoRIF_predicted_zscore
positive_regulation_of_gliogenesis_(GO:0014015)	1/200	0.419254	0.419254	0.650941	0.650941	-0.0892072	0.0775458	tinc	GO_BP_autoRIF_predicted_zscore
positive_regulation_of_protein_localization_to_nucleus_(GO:1900182)	1/200	0.419254	0.419254	0.650941	0.650941	-0.0888718	0.0772543	CG3918	GO_BP_autoRIF_predicted_zscore
positive_regulation_of_cell_morphogenesis_involved_in_differentiation_(GO:0010770)	1/200	0.419254	0.419254	0.650941	0.650941	-0.0866301	0.0753056	tgo	GO_BP_autoRIF_predicted_zscore
negative_regulation_of_Toll_signaling_pathway_(GO:0045751)	1/200	0.419254	0.419254	0.650941	0.650941	-0.084578	0.0735217	klar	GO_BP_autoRIF_predicted_zscore
positive_regulation_of_apoptotic_process_involved_in_development_(GO:1904747)	1/200	0.419254	0.419254	0.650941	0.650941	-0.0713056	0.0619844	tgo	GO_BP_autoRIF_predicted_zscore
photoreceptor_cell_differentiation_(GO:0046530)	1/200	0.419254	0.419254	0.650941	0.650941	-0.0546	0.0474625	tgo	GO_BP_autoRIF_predicted_zscore
positive_regulation_of_heart_contraction_(GO:0045823)	1/200	0.419254	0.419254	0.650941	0.650941	-0.0412659	0.0358716	SK	GO_BP_autoRIF_predicted_zscore
positive_regulation_of_posttranscriptional_gene_silencing_(GO:0060148)	1/200	0.419254	0.419254	0.650941	0.650941	-0.039013	0.0339132	tgo	GO_BP_autoRIF_predicted_zscore
R7_cell_development_(GO:0045467)	1/200	0.419254	0.419254	0.650941	0.650941	-0.0285236	0.0247949	tinc	GO_BP_autoRIF_predicted_zscore
positive_regulation_of_synaptic_growth_at_neuromuscular_junction_(GO:0045887)	1/200	0.419254	0.419254	0.650941	0.650941	-0.0265802	0.0231055	pigs	GO_BP_autoRIF_predicted_zscore
Rab_protein_signal_transduction_(GO:0032482)	1/200	0.419254	0.419254	0.650941	0.650941	-0.0211059	0.0183469	tinc	GO_BP_autoRIF_predicted_zscore
negative_regulation_of_Notch_signaling_pathway_(GO:0045746)	1/200	0.419254	0.419254	0.650941	0.650941	-0.0140059	0.012175	tgo	GO_BP_autoRIF_predicted_zscore
negative_regulation_of_Wnt_signaling_pathway_(GO:0030178)	1/200	0.419254	0.419254	0.650941	0.650941	-0.0126299	0.0109789	tgo	GO_BP_autoRIF_predicted_zscore
positive_regulation_of_Notch_signaling_pathway_(GO:0045747)	1/200	0.419254	0.419254	0.650941	0.650941	-0.01075	0.00934473	tgo	GO_BP_autoRIF_predicted_zscore
positive_regulation_of_protein_modification_process_(GO:0031401)	1/200	0.419254	0.419254	0.650941	0.650941	-0.00632418	0.00549747	CCT8	GO_BP_autoRIF_predicted_zscore
positive_regulation_of_behavior_(GO:0048520)	1/200	0.419254	0.419254	0.650941	0.650941	0.00700447	-0.00608883	Sep4	GO_BP_autoRIF_predicted_zscore
positive_regulation_of_ERBB_signaling_pathway_(GO:1901186)	1/200	0.419254	0.419254	0.650941	0.650941	0.0154804	-0.0134567	tgo	GO_BP_autoRIF_predicted_zscore
positive_regulation_of_developmental_process_(GO:0051094)	1/200	0.419254	0.419254	0.650941	0.650941	0.0207727	-0.0180572	tgo	GO_BP_autoRIF_predicted_zscore
negative_regulation_of_signal_transduction_(GO:0009968)	1/200	0.419254	0.419254	0.650941	0.650941	0.0275611	-0.0239582	tgo	GO_BP_autoRIF_predicted_zscore
optomotor_response_(GO:0071632)	1/200	0.419254	0.419254	0.650941	0.650941	0.0345169	-0.0300048	tinc	GO_BP_autoRIF_predicted_zscore
positive_regulation_of_histone_modification_(GO:0031058)	1/200	0.419254	0.419254	0.650941	0.650941	0.0355497	-0.0309025	CG3918	GO_BP_autoRIF_predicted_zscore
positive_regulation_of_smoothened_signaling_pathway_(GO:0045880)	1/200	0.419254	0.419254	0.650941	0.650941	0.067408	-0.0585963	tgo	GO_BP_autoRIF_predicted_zscore
positive_regulation_of_cell-cell_adhesion_(GO:0022409)	1/200	0.419254	0.419254	0.650941	0.650941	0.0726036	-0.0631127	tgo	GO_BP_autoRIF_predicted_zscore
positive_regulation_of_proteasomal_protein_catabolic_process_(GO:1901800)	1/200	0.419254	0.419254	0.650941	0.650941	0.0749388	-0.0651427	CG4822	GO_BP_autoRIF_predicted_zscore
positive_regulation_of_cell_communication_(GO:0010647)	1/200	0.419254	0.419254	0.650941	0.650941	0.0774195	-0.0672991	tgo	GO_BP_autoRIF_predicted_zscore
positive_regulation_of_catabolic_process_(GO:0009896)	1/200	0.419254	0.419254	0.650941	0.650941	0.0789022	-0.068588	tgo	GO_BP_autoRIF_predicted_zscore
protein_localization_to_plasma_membrane_(GO:0072659)	1/192	0.406429	0.419254	0.635847	0.650941	0.0789333	-0.0710672	tgo	GO_BP_autoRIF_predicted_zscore
positive_regulation_of_proteasomal_ubiquitin-dependent_protein_catabolic_process_(GO:0032436)	1/200	0.419254	0.419254	0.650941	0.650941	0.0818798	-0.0711763	CG4822	GO_BP_autoRIF_predicted_zscore
zinc_ion_homeostasis_(GO:0055069)	1/200	0.419254	0.419254	0.650941	0.650941	0.0848977	-0.0737997	MtnB	GO_BP_autoRIF_predicted_zscore
positive_regulation_of_programmed_cell_death_(GO:0043068)	1/200	0.419254	0.419254	0.650941	0.650941	0.0895667	-0.0778583	tgo	GO_BP_autoRIF_predicted_zscore
positive_regulation_of_neuron_remodeling_(GO:1904801)	1/200	0.419254	0.419254	0.650941	0.650941	0.090238	-0.0784419	Sep4	GO_BP_autoRIF_predicted_zscore
positive_regulation_of_protein_transport_(GO:0051222)	1/200	0.419254	0.419254	0.650941	0.650941	0.0925115	-0.0804182	tgo	GO_BP_autoRIF_predicted_zscore
positive_regulation_of_neuron_differentiation_(GO:0045666)	1/200	0.419254	0.419254	0.650941	0.650941	0.0969179	-0.0842486	tgo	GO_BP_autoRIF_predicted_zscore
positive_regulation_of_calcium-mediated_signaling_(GO:0050850)	1/200	0.419254	0.419254	0.650941	0.650941	0.0986113	-0.0857206	klar	GO_BP_autoRIF_predicted_zscore
positive_regulation_of_cell_proliferation_(GO:0008284)	1/200	0.419254	0.419254	0.650941	0.650941	0.100309	-0.0871968	tgo	GO_BP_autoRIF_predicted_zscore
positive_regulation_of_gene_expression_(GO:0010628)	1/200	0.419254	0.419254	0.650941	0.650941	0.111462	-0.0968912	tgo	GO_BP_autoRIF_predicted_zscore
posterior_head_segmentation_(GO:0035289)	1/200	0.419254	0.419254	0.650941	0.650941	0.129847	-0.112873	tgo	GO_BP_autoRIF_predicted_zscore
RNA_processing_(GO:0006396)	1/200	0.419254	0.419254	0.650941	0.650941	0.130456	-0.113402	tgo	GO_BP_autoRIF_predicted_zscore
pre-mRNA_cleavage_required_for_polyadenylation_(GO:0098789)	1/200	0.419254	0.419254	0.650941	0.650941	0.132024	-0.114766	CG3918	GO_BP_autoRIF_predicted_zscore
protein_K48-linked_ubiquitination_(GO:0070936)	1/200	0.419254	0.419254	0.650941	0.650941	0.142412	-0.123795	CG4822	GO_BP_autoRIF_predicted_zscore
positive_regulation_of_imaginal_disc_growth_(GO:0045572)	1/200	0.419254	0.419254	0.650941	0.650941	0.14881	-0.129357	rols	GO_BP_autoRIF_predicted_zscore
positive_regulation_of_insulin_receptor_signaling_pathway_(GO:0046628)	1/200	0.419254	0.419254	0.650941	0.650941	0.149236	-0.129728	pigs	GO_BP_autoRIF_predicted_zscore
positive_regulation_of_steroid_hormone_biosynthetic_process_(GO:0090031)	1/200	0.419254	0.419254	0.650941	0.650941	0.150523	-0.130846	klar	GO_BP_autoRIF_predicted_zscore
R7_cell_differentiation_(GO:0045466)	1/200	0.419254	0.419254	0.650941	0.650941	0.151016	-0.131275	tgo	GO_BP_autoRIF_predicted_zscore
purine_ribonucleotide_biosynthetic_process_(GO:0009152)	1/200	0.419254	0.419254	0.650941	0.650941	0.151516	-0.13171	tinc	GO_BP_autoRIF_predicted_zscore
positive_regulation_of_lipid_storage_(GO:0010884)	1/200	0.419254	0.419254	0.650941	0.650941	0.160264	-0.139314	pigs	GO_BP_autoRIF_predicted_zscore
positive_regulation_of_ubiquitin-protein_transferase_activity_(GO:0051443)	1/200	0.419254	0.419254	0.650941	0.650941	0.161116	-0.140055	CG3918	GO_BP_autoRIF_predicted_zscore
proteasome-mediated_ubiquitin-dependent_protein_catabolic_process_(GO:0043161)	1/200	0.419254	0.419254	0.650941	0.650941	0.166513	-0.144746	CG5174	GO_BP_autoRIF_predicted_zscore
positive_regulation_of_small_GTPase_mediated_signal_transduction_(GO:0051057)	1/200	0.419254	0.419254	0.650941	0.650941	0.166983	-0.145155	CkIIalpha	GO_BP_autoRIF_predicted_zscore
purine_ribonucleotide_metabolic_process_(GO:0009150)	1/200	0.419254	0.419254	0.650941	0.650941	0.167494	-0.145598	tinc	GO_BP_autoRIF_predicted_zscore
regulation_of_autophagosome_assembly_(GO:2000785)	1/200	0.419254	0.419254	0.650941	0.650941	0.169789	-0.147593	CG5174	GO_BP_autoRIF_predicted_zscore
positive_regulation_of_proteolysis_involved_in_cellular_protein_catabolic_process_(GO:1903052)	1/200	0.419254	0.419254	0.650941	0.650941	0.169848	-0.147645	tgo	GO_BP_autoRIF_predicted_zscore
protein_targeting_to_vacuole_(GO:0006623)	1/200	0.419254	0.419254	0.650941	0.650941	0.173835	-0.151111	CG5174	GO_BP_autoRIF_predicted_zscore
positive_regulation_of_ecdysteroid_biosynthetic_process_(GO:0045998)	1/200	0.419254	0.419254	0.650941	0.650941	0.175288	-0.152374	klar	GO_BP_autoRIF_predicted_zscore
positive_regulation_of_ecdysteroid_metabolic_process_(GO:0045966)	1/200	0.419254	0.419254	0.650941	0.650941	0.176255	-0.153214	klar	GO_BP_autoRIF_predicted_zscore
RNA_splicing_(GO:0008380)	1/200	0.419254	0.419254	0.650941	0.650941	0.178958	-0.155564	tgo	GO_BP_autoRIF_predicted_zscore
postsynaptic_membrane_assembly_(GO:0097104)	1/200	0.419254	0.419254	0.650941	0.650941	0.182227	-0.158406	klar	GO_BP_autoRIF_predicted_zscore
postsynaptic_membrane_organization_(GO:0001941)	1/200	0.419254	0.419254	0.650941	0.650941	0.194725	-0.16927	Sep4	GO_BP_autoRIF_predicted_zscore
positive_regulation_of_cellular_protein_metabolic_process_(GO:0032270)	1/200	0.419254	0.419254	0.650941	0.650941	0.203218	-0.176653	tgo	GO_BP_autoRIF_predicted_zscore
regulation_of_cardioblast_cell_fate_specification_(GO:0042686)	1/200	0.419254	0.419254	0.650941	0.650941	0.21456	-0.186512	tgo	GO_BP_autoRIF_predicted_zscore
regulation_of_G-protein_coupled_receptor_protein_signaling_pathway_(GO:0008277)	1/200	0.419254	0.419254	0.650941	0.650941	0.221684	-0.192705	tinc	GO_BP_autoRIF_predicted_zscore
protein_deglycosylation_(GO:0006517)	1/200	0.419254	0.419254	0.650941	0.650941	0.226683	-0.197051	rols	GO_BP_autoRIF_predicted_zscore
RNA_polymerase_II_transcriptional_preinitiation_complex_assembly_(GO:0051123)	1/200	0.419254	0.419254	0.650941	0.650941	0.226815	-0.197165	CG3918	GO_BP_autoRIF_predicted_zscore
purine_nucleotide_metabolic_process_(GO:0006163)	1/200	0.419254	0.419254	0.650941	0.650941	0.230098	-0.200019	tinc	GO_BP_autoRIF_predicted_zscore
protein_processing_involved_in_protein_targeting_to_mitochondrion_(GO:0006627)	1/200	0.419254	0.419254	0.650941	0.650941	0.23701	-0.206027	CCT8	GO_BP_autoRIF_predicted_zscore
protein_N-linked_glycosylation_(GO:0006487)	1/200	0.419254	0.419254	0.650941	0.650941	0.240532	-0.209089	rols	GO_BP_autoRIF_predicted_zscore
regulation_of_growth_of_symbiont_in_host_(GO:0044126)	1/200	0.419254	0.419254	0.650941	0.650941	0.241392	-0.209837	CG32276	GO_BP_autoRIF_predicted_zscore
positive_regulation_of_neuron_death_(GO:1901216)	1/200	0.419254	0.419254	0.650941	0.650941	0.251991	-0.21905	klar	GO_BP_autoRIF_predicted_zscore
positive_regulation_of_cell_cycle_process_(GO:0090068)	1/200	0.419254	0.419254	0.650941	0.650941	0.261958	-0.227714	tgo	GO_BP_autoRIF_predicted_zscore
regulation_of_endocytic_recycling_(GO:2001135)	1/200	0.419254	0.419254	0.650941	0.650941	0.264804	-0.230188	Sep4	GO_BP_autoRIF_predicted_zscore
regulation_of_axonogenesis_(GO:0050770)	1/200	0.419254	0.419254	0.650941	0.650941	0.265006	-0.230364	tinc	GO_BP_autoRIF_predicted_zscore
positive_regulation_of_transcription_of_Notch_receptor_target_(GO:0007221)	1/200	0.419254	0.419254	0.650941	0.650941	0.266683	-0.231822	tgo	GO_BP_autoRIF_predicted_zscore
S-adenosylmethionine_cycle_(GO:0033353)	1/200	0.419254	0.419254	0.650941	0.650941	0.266713	-0.231847	CCT8	GO_BP_autoRIF_predicted_zscore
positive_regulation_of_transmembrane_receptor_protein_serine/threonine_kinase_signaling_pathway_(GO:0090100)	1/200	0.419254	0.419254	0.650941	0.650941	0.268834	-0.233692	rols	GO_BP_autoRIF_predicted_zscore
R8_cell_differentiation_(GO:0045465)	1/200	0.419254	0.419254	0.650941	0.650941	0.268944	-0.233787	tgo	GO_BP_autoRIF_predicted_zscore
positive_regulation_of_protein_kinase_B_signaling_(GO:0051897)	1/200	0.419254	0.419254	0.650941	0.650941	0.27016	-0.234844	CkIIalpha	GO_BP_autoRIF_predicted_zscore
positive_regulation_of_cell_growth_(GO:0030307)	1/200	0.419254	0.419254	0.650941	0.650941	0.270173	-0.234855	tgo	GO_BP_autoRIF_predicted_zscore
positive_regulation_of_transport_(GO:0051050)	1/200	0.419254	0.419254	0.650941	0.650941	0.273606	-0.23784	tgo	GO_BP_autoRIF_predicted_zscore
positive_regulation_of_neurogenesis_(GO:0050769)	1/200	0.419254	0.419254	0.650941	0.650941	0.285153	-0.247877	tgo	GO_BP_autoRIF_predicted_zscore
regulation_of_cyclin-dependent_protein_serine/threonine_kinase_activity_(GO:0000079)	1/200	0.419254	0.419254	0.650941	0.650941	0.29054	-0.25256	CG11180	GO_BP_autoRIF_predicted_zscore
positive_regulation_of_organ_growth_(GO:0046622)	1/200	0.419254	0.419254	0.650941	0.650941	0.29288	-0.254594	tgo	GO_BP_autoRIF_predicted_zscore
regulation_of_actin_cytoskeleton_organization_(GO:0032956)	1/200	0.419254	0.419254	0.650941	0.650941	0.297668	-0.258756	CG2926	GO_BP_autoRIF_predicted_zscore
positive_regulation_of_triglyceride_catabolic_process_(GO:0010898)	1/200	0.419254	0.419254	0.650941	0.650941	0.30017	-0.260931	CCT8	GO_BP_autoRIF_predicted_zscore
positive_regulation_of_triglyceride_metabolic_process_(GO:0090208)	1/200	0.419254	0.419254	0.650941	0.650941	0.304669	-0.264842	CCT8	GO_BP_autoRIF_predicted_zscore
receptor-mediated_endocytosis_(GO:0006898)	1/200	0.419254	0.419254	0.650941	0.650941	0.305755	-0.265786	pigs	GO_BP_autoRIF_predicted_zscore
positive_regulation_of_protein_metabolic_process_(GO:0051247)	1/200	0.419254	0.419254	0.650941	0.650941	0.31916	-0.277439	tgo	GO_BP_autoRIF_predicted_zscore
purine_ribonucleotide_transport_(GO:0015868)	1/200	0.419254	0.419254	0.650941	0.650941	0.321097	-0.279123	pigs	GO_BP_autoRIF_predicted_zscore
positive_regulation_of_protein_catabolic_process_(GO:0045732)	1/200	0.419254	0.419254	0.650941	0.650941	0.327468	-0.284661	tgo	GO_BP_autoRIF_predicted_zscore
pyruvate_transport_(GO:0006848)	1/200	0.419254	0.419254	0.650941	0.650941	0.331854	-0.288473	CG3630	GO_BP_autoRIF_predicted_zscore
positive_regulation_of_protein_secretion_(GO:0050714)	1/200	0.419254	0.419254	0.650941	0.650941	0.342195	-0.297462	tgo	GO_BP_autoRIF_predicted_zscore
positive_regulation_of_proteolysis_(GO:0045862)	1/200	0.419254	0.419254	0.650941	0.650941	0.342424	-0.297661	tgo	GO_BP_autoRIF_predicted_zscore
protein_localization_to_microtubule_(GO:0035372)	1/200	0.419254	0.419254	0.650941	0.650941	0.356956	-0.310294	CG2926	GO_BP_autoRIF_predicted_zscore
positive_regulation_of_growth_(GO:0045927)	1/200	0.419254	0.419254	0.650941	0.650941	0.357625	-0.310876	tgo	GO_BP_autoRIF_predicted_zscore
regulation_of_Rab_protein_signal_transduction_(GO:0032483)	1/200	0.419254	0.419254	0.650941	0.650941	0.363132	-0.315662	tinc	GO_BP_autoRIF_predicted_zscore
sensory_perception_of_sweet_taste_(GO:0050916)	1/200	0.419254	0.419254	0.650941	0.650941	0.363556	-0.316031	SK	GO_BP_autoRIF_predicted_zscore
regulated_exocytosis_(GO:0045055)	1/200	0.419254	0.419254	0.650941	0.650941	0.367384	-0.319359	Sep4	GO_BP_autoRIF_predicted_zscore
positive_regulation_of_wound_healing_(GO:0090303)	1/200	0.419254	0.419254	0.650941	0.650941	0.370448	-0.322022	rols	GO_BP_autoRIF_predicted_zscore
protein_localization_to_microtubule_plus-end_(GO:1904825)	1/200	0.419254	0.419254	0.650941	0.650941	0.371737	-0.323143	CG2926	GO_BP_autoRIF_predicted_zscore
regulation_of_organelle_organization_(GO:0033043)	1/200	0.419254	0.419254	0.650941	0.650941	0.378037	-0.328619	CG3918	GO_BP_autoRIF_predicted_zscore
protein_transport_along_microtubule_(GO:0098840)	1/200	0.419254	0.419254	0.650941	0.650941	0.378231	-0.328788	CG2926	GO_BP_autoRIF_predicted_zscore
post-embryonic_animal_organ_morphogenesis_(GO:0048563)	1/200	0.419254	0.419254	0.650941	0.650941	0.382251	-0.332282	tgo	GO_BP_autoRIF_predicted_zscore
protein_deacylation_(GO:0035601)	1/200	0.419254	0.419254	0.650941	0.650941	0.390501	-0.339454	CG32486	GO_BP_autoRIF_predicted_zscore
positive_regulation_of_toll-like_receptor_signaling_pathway_(GO:0034123)	1/200	0.419254	0.419254	0.650941	0.650941	0.400491	-0.348138	CG15387	GO_BP_autoRIF_predicted_zscore
proteoglycan_metabolic_process_(GO:0006029)	1/200	0.419254	0.419254	0.650941	0.650941	0.401875	-0.349341	rols	GO_BP_autoRIF_predicted_zscore
proteasomal_protein_catabolic_process_(GO:0010498)	1/200	0.419254	0.419254	0.650941	0.650941	0.404662	-0.351764	tgo	GO_BP_autoRIF_predicted_zscore
regulation_of_calcium-mediated_signaling_(GO:0050848)	1/200	0.419254	0.419254	0.650941	0.650941	0.40522	-0.352249	tinc	GO_BP_autoRIF_predicted_zscore
ribosomal_small_subunit_biogenesis_(GO:0042274)	1/200	0.419254	0.419254	0.650941	0.650941	0.411015	-0.357286	CG3918	GO_BP_autoRIF_predicted_zscore
proteoglycan_biosynthetic_process_(GO:0030166)	1/200	0.419254	0.419254	0.650941	0.650941	0.413999	-0.35988	rols	GO_BP_autoRIF_predicted_zscore
response_to_copper_ion_(GO:0046688)	1/200	0.419254	0.419254	0.650941	0.650941	0.415915	-0.361546	MtnB	GO_BP_autoRIF_predicted_zscore
protein_sumoylation_(GO:0016925)	1/200	0.419254	0.419254	0.650941	0.650941	0.417404	-0.36284	CG3918	GO_BP_autoRIF_predicted_zscore
regulation_of_microtubule_depolymerization_(GO:0031114)	1/200	0.419254	0.419254	0.650941	0.650941	0.419143	-0.364352	CG2926	GO_BP_autoRIF_predicted_zscore
SREBP_signaling_pathway_(GO:0032933)	1/200	0.419254	0.419254	0.650941	0.650941	0.433535	-0.376862	tgo	GO_BP_autoRIF_predicted_zscore
response_to_zinc_ion_(GO:0010043)	1/200	0.419254	0.419254	0.650941	0.650941	0.436861	-0.379754	MtnB	GO_BP_autoRIF_predicted_zscore
positive_regulation_of_oogenesis_(GO:1905881)	1/200	0.419254	0.419254	0.650941	0.650941	0.452456	-0.39331	tgo	GO_BP_autoRIF_predicted_zscore
STAT_cascade_(GO:0097696)	1/200	0.419254	0.419254	0.650941	0.650941	0.453215	-0.39397	tgo	GO_BP_autoRIF_predicted_zscore
protein_localization_to_microtubule_end_(GO:1905725)	1/200	0.419254	0.419254	0.650941	0.650941	0.459425	-0.399368	CG2926	GO_BP_autoRIF_predicted_zscore
regulation_of_synaptic_growth_at_neuromuscular_junction_(GO:0008582)	1/200	0.419254	0.419254	0.650941	0.650941	0.461467	-0.401143	tinc	GO_BP_autoRIF_predicted_zscore
regulation_of_olfactory_learning_(GO:0090328)	1/200	0.419254	0.419254	0.650941	0.650941	0.466002	-0.405085	Sep4	GO_BP_autoRIF_predicted_zscore
regulation_of_BMP_signaling_pathway_(GO:0030510)	1/200	0.419254	0.419254	0.650941	0.650941	0.478239	-0.415722	tgo	GO_BP_autoRIF_predicted_zscore
response_to_anesthetic_(GO:0072347)	1/200	0.419254	0.419254	0.650941	0.650941	0.490842	-0.426678	SK	GO_BP_autoRIF_predicted_zscore
regulation_of_membrane_potential_in_photoreceptor_cell_(GO:0016057)	1/200	0.419254	0.419254	0.650941	0.650941	0.493091	-0.428633	SK	GO_BP_autoRIF_predicted_zscore
response_to_reactive_oxygen_species_(GO:0000302)	1/200	0.419254	0.419254	0.650941	0.650941	0.496881	-0.431927	CCT8	GO_BP_autoRIF_predicted_zscore
regulation_of_dendrite_development_(GO:0050773)	1/200	0.419254	0.419254	0.650941	0.650941	0.499386	-0.434105	tgo	GO_BP_autoRIF_predicted_zscore
regulation_of_protein_ubiquitination_(GO:0031396)	1/200	0.419254	0.419254	0.650941	0.650941	0.503782	-0.437927	tgo	GO_BP_autoRIF_predicted_zscore
regulation_of_gene_expression_(GO:0010468)	1/200	0.419254	0.419254	0.650941	0.650941	0.507051	-0.440768	tgo	GO_BP_autoRIF_predicted_zscore
regulation_of_photoreceptor_cell_axon_guidance_(GO:2000289)	1/200	0.419254	0.419254	0.650941	0.650941	0.507726	-0.441355	klar	GO_BP_autoRIF_predicted_zscore
protein_localization_to_cell_cortex_(GO:0072697)	1/200	0.419254	0.419254	0.650941	0.650941	0.510466	-0.443737	tgo	GO_BP_autoRIF_predicted_zscore
regulation_of_neuromuscular_synaptic_transmission_(GO:1900073)	1/200	0.419254	0.419254	0.650941	0.650941	0.511221	-0.444393	Sep4	GO_BP_autoRIF_predicted_zscore
regulation_of_nervous_system_development_(GO:0051960)	1/200	0.419254	0.419254	0.650941	0.650941	0.512518	-0.445521	tinc	GO_BP_autoRIF_predicted_zscore
regulation_of_synaptic_transmission,_glutamatergic_(GO:0051966)	1/200	0.419254	0.419254	0.650941	0.650941	0.515724	-0.448307	Sep4	GO_BP_autoRIF_predicted_zscore
regulation_of_cellular_pH_(GO:0030641)	1/200	0.419254	0.419254	0.650941	0.650941	0.521831	-0.453616	tgo	GO_BP_autoRIF_predicted_zscore
regulation_of_neuron_projection_development_(GO:0010975)	1/200	0.419254	0.419254	0.650941	0.650941	0.545037	-0.473788	tinc	GO_BP_autoRIF_predicted_zscore
regulation_of_neuronal_synaptic_plasticity_(GO:0048168)	1/200	0.419254	0.419254	0.650941	0.650941	0.546966	-0.475465	Sep4	GO_BP_autoRIF_predicted_zscore
regulation_of_neuron_remodeling_(GO:1904799)	1/200	0.419254	0.419254	0.650941	0.650941	0.548046	-0.476405	Sep4	GO_BP_autoRIF_predicted_zscore
regulation_of_exocytosis_(GO:0017157)	1/200	0.419254	0.419254	0.650941	0.650941	0.548832	-0.477088	Sep4	GO_BP_autoRIF_predicted_zscore
rhabdomere_development_(GO:0042052)	1/200	0.419254	0.419254	0.650941	0.650941	0.554184	-0.48174	tinc	GO_BP_autoRIF_predicted_zscore
regulation_of_proteolysis_(GO:0030162)	1/200	0.419254	0.419254	0.650941	0.650941	0.55854	-0.485527	tgo	GO_BP_autoRIF_predicted_zscore
regulation_of_RNA_polymerase_II_transcriptional_preinitiation_complex_assembly_(GO:0045898)	1/200	0.419254	0.419254	0.650941	0.650941	0.560615	-0.48733	CG3918	GO_BP_autoRIF_predicted_zscore
regulation_of_microtubule_cytoskeleton_organization_(GO:0070507)	1/200	0.419254	0.419254	0.650941	0.650941	0.561902	-0.488449	CG2926	GO_BP_autoRIF_predicted_zscore
regulation_of_synapse_organization_(GO:0050807)	1/200	0.419254	0.419254	0.650941	0.650941	0.568571	-0.494246	SK	GO_BP_autoRIF_predicted_zscore
regulation_of_cell_cycle_G2/M_phase_transition_(GO:1902749)	1/200	0.419254	0.419254	0.650941	0.650941	0.569795	-0.49531	CG3918	GO_BP_autoRIF_predicted_zscore
regulation_of_rhodopsin_mediated_signaling_pathway_(GO:0022400)	1/200	0.419254	0.419254	0.650941	0.650941	0.569887	-0.495391	SK	GO_BP_autoRIF_predicted_zscore
regulation_of_compound_eye_retinal_cell_programmed_cell_death_(GO:0046669)	1/200	0.419254	0.419254	0.650941	0.650941	0.5709	-0.496271	rols	GO_BP_autoRIF_predicted_zscore
regulation_of_synaptic_vesicle_exocytosis_(GO:2000300)	1/200	0.419254	0.419254	0.650941	0.650941	0.572373	-0.497551	Sep4	GO_BP_autoRIF_predicted_zscore
sensory_perception_of_taste_(GO:0050909)	1/200	0.419254	0.419254	0.650941	0.650941	0.575055	-0.499882	SK	GO_BP_autoRIF_predicted_zscore
protein_catabolic_process_(GO:0030163)	1/200	0.419254	0.419254	0.650941	0.650941	0.584215	-0.507846	tgo	GO_BP_autoRIF_predicted_zscore
regulation_of_sodium_ion_transport_(GO:0002028)	1/200	0.419254	0.419254	0.650941	0.650941	0.584406	-0.508011	SK	GO_BP_autoRIF_predicted_zscore
regulation_of_transposition_(GO:0010528)	1/200	0.419254	0.419254	0.650941	0.650941	0.585201	-0.508703	tgo	GO_BP_autoRIF_predicted_zscore
regulation_of_axon_extension_(GO:0030516)	1/200	0.419254	0.419254	0.650941	0.650941	0.590413	-0.513233	tgo	GO_BP_autoRIF_predicted_zscore
regulation_of_stress_fiber_assembly_(GO:0051492)	1/200	0.419254	0.419254	0.650941	0.650941	0.59144	-0.514126	CG2926	GO_BP_autoRIF_predicted_zscore
tetrahydrobiopterin_metabolic_process_(GO:0046146)	1/200	0.419254	0.419254	0.650941	0.650941	0.596697	-0.518695	Fis1	GO_BP_autoRIF_predicted_zscore
tetrahydrobiopterin_biosynthetic_process_(GO:0006729)	1/200	0.419254	0.419254	0.650941	0.650941	0.596815	-0.518798	Fis1	GO_BP_autoRIF_predicted_zscore
regulation_of_ecdysteroid_biosynthetic_process_(GO:0007554)	1/200	0.419254	0.419254	0.650941	0.650941	0.608345	-0.528821	klar	GO_BP_autoRIF_predicted_zscore
regulation_of_microtubule-based_process_(GO:0032886)	1/200	0.419254	0.419254	0.650941	0.650941	0.613492	-0.533295	tinc	GO_BP_autoRIF_predicted_zscore
regulation_of_protein_localization_to_nucleus_(GO:1900180)	1/200	0.419254	0.419254	0.650941	0.650941	0.613994	-0.533731	CG3918	GO_BP_autoRIF_predicted_zscore
regulation_of_transforming_growth_factor_beta_receptor_signaling_pathway_(GO:0017015)	1/200	0.419254	0.419254	0.650941	0.650941	0.615508	-0.535048	klar	GO_BP_autoRIF_predicted_zscore
Wnt_signaling_pathway_(GO:0016055)	1/200	0.419254	0.419254	0.650941	0.650941	0.621388	-0.540158	tgo	GO_BP_autoRIF_predicted_zscore
Wnt_protein_secretion_(GO:0061355)	1/200	0.419254	0.419254	0.650941	0.650941	0.623839	-0.542289	tgo	GO_BP_autoRIF_predicted_zscore
regulation_of_synaptic_vesicle_endocytosis_(GO:1900242)	1/200	0.419254	0.419254	0.650941	0.650941	0.625228	-0.543496	Sep4	GO_BP_autoRIF_predicted_zscore
retrograde_axonal_transport_(GO:0008090)	1/200	0.419254	0.419254	0.650941	0.650941	0.62538	-0.543629	pigs	GO_BP_autoRIF_predicted_zscore
regulation_of_rhodopsin_gene_expression_(GO:0007468)	1/200	0.419254	0.419254	0.650941	0.650941	0.627397	-0.545383	SK	GO_BP_autoRIF_predicted_zscore
regulation_of_cell_morphogenesis_involved_in_differentiation_(GO:0010769)	1/200	0.419254	0.419254	0.650941	0.650941	0.630023	-0.547665	tgo	GO_BP_autoRIF_predicted_zscore
regulation_of_nuclear_division_(GO:0051783)	1/200	0.419254	0.419254	0.650941	0.650941	0.63066	-0.548219	CG3918	GO_BP_autoRIF_predicted_zscore
response_to_disaccharide_(GO:0034285)	1/200	0.419254	0.419254	0.650941	0.650941	0.632412	-0.549742	SK	GO_BP_autoRIF_predicted_zscore
rRNA_modification_(GO:0000154)	1/200	0.419254	0.419254	0.650941	0.650941	0.634056	-0.551171	pho	GO_BP_autoRIF_predicted_zscore
regulation_of_protein_localization_(GO:0032880)	1/200	0.419254	0.419254	0.650941	0.650941	0.635598	-0.552511	tgo	GO_BP_autoRIF_predicted_zscore
regulation_of_transcription_from_RNA_polymerase_III_promoter_(GO:0006359)	1/200	0.419254	0.419254	0.650941	0.650941	0.658884	-0.572753	CG2926	GO_BP_autoRIF_predicted_zscore
protein_modification_by_small_protein_conjugation_(GO:0032446)	1/200	0.419254	0.419254	0.650941	0.650941	0.659987	-0.573712	CG3918	GO_BP_autoRIF_predicted_zscore
regulation_of_oviposition_(GO:0046662)	1/200	0.419254	0.419254	0.650941	0.650941	0.663071	-0.576393	klar	GO_BP_autoRIF_predicted_zscore
ribosomal_protein_import_into_nucleus_(GO:0006610)	1/200	0.419254	0.419254	0.650941	0.650941	0.665845	-0.578804	CG11180	GO_BP_autoRIF_predicted_zscore
regulation_of_cell_fate_commitment_(GO:0010453)	1/200	0.419254	0.419254	0.650941	0.650941	0.667942	-0.580627	tgo	GO_BP_autoRIF_predicted_zscore
rRNA_methylation_(GO:0031167)	1/200	0.419254	0.419254	0.650941	0.650941	0.668368	-0.580998	CG3918	GO_BP_autoRIF_predicted_zscore
regulation_of_neural_precursor_cell_proliferation_(GO:2000177)	1/200	0.419254	0.419254	0.650941	0.650941	0.668573	-0.581176	tgo	GO_BP_autoRIF_predicted_zscore
regulation_of_neurotransmitter_transport_(GO:0051588)	1/200	0.419254	0.419254	0.650941	0.650941	0.669879	-0.582311	Sep4	GO_BP_autoRIF_predicted_zscore
regulation_of_multicellular_organism_growth_(GO:0040014)	1/200	0.419254	0.419254	0.650941	0.650941	0.674871	-0.58665	CG3918	GO_BP_autoRIF_predicted_zscore
snoRNA_3'-end_processing_(GO:0031126)	1/200	0.419254	0.419254	0.650941	0.650941	0.676553	-0.588113	CdGAPr	GO_BP_autoRIF_predicted_zscore
regulation_of_insulin_secretion_(GO:0050796)	1/200	0.419254	0.419254	0.650941	0.650941	0.679766	-0.590905	Sep4	GO_BP_autoRIF_predicted_zscore
regulation_of_neuron_differentiation_(GO:0045664)	1/200	0.419254	0.419254	0.650941	0.650941	0.681212	-0.592162	tgo	GO_BP_autoRIF_predicted_zscore
regulation_of_development,_heterochronic_(GO:0040034)	1/200	0.419254	0.419254	0.650941	0.650941	0.682459	-0.593247	klar	GO_BP_autoRIF_predicted_zscore
regulation_of_protein_modification_process_(GO:0031399)	1/200	0.419254	0.419254	0.650941	0.650941	0.683473	-0.594128	tgo	GO_BP_autoRIF_predicted_zscore
regulation_of_microtubule_polymerization_or_depolymerization_(GO:0031110)	1/200	0.419254	0.419254	0.650941	0.650941	0.687308	-0.597462	CG2926	GO_BP_autoRIF_predicted_zscore
response_to_sucrose_(GO:0009744)	1/200	0.419254	0.419254	0.650941	0.650941	0.688426	-0.598433	SK	GO_BP_autoRIF_predicted_zscore
regulation_of_intracellular_mRNA_localization_(GO:1904580)	1/200	0.419254	0.419254	0.650941	0.650941	0.692889	-0.602313	CG2926	GO_BP_autoRIF_predicted_zscore
regulation_of_primary_metabolic_process_(GO:0080090)	1/200	0.419254	0.419254	0.650941	0.650941	0.700761	-0.609156	tgo	GO_BP_autoRIF_predicted_zscore
ribonucleoprotein_complex_assembly_(GO:0022618)	1/200	0.419254	0.419254	0.650941	0.650941	0.701392	-0.609705	CG3918	GO_BP_autoRIF_predicted_zscore
sensory_perception_of_light_stimulus_(GO:0050953)	1/200	0.419254	0.419254	0.650941	0.650941	0.708381	-0.61578	SK	GO_BP_autoRIF_predicted_zscore
regulation_of_myosin_II_filament_organization_(GO:0043519)	1/200	0.419254	0.419254	0.650941	0.650941	0.711989	-0.618916	tgo	GO_BP_autoRIF_predicted_zscore
regulation_of_translation_(GO:0006417)	1/200	0.419254	0.419254	0.650941	0.650941	0.716774	-0.623076	tgo	GO_BP_autoRIF_predicted_zscore
regulation_of_embryonic_pattern_specification_(GO:1902875)	1/200	0.419254	0.419254	0.650941	0.650941	0.720955	-0.62671	tgo	GO_BP_autoRIF_predicted_zscore
regulation_of_RNA_splicing_(GO:0043484)	1/200	0.419254	0.419254	0.650941	0.650941	0.724507	-0.629798	tgo	GO_BP_autoRIF_predicted_zscore
succinate_transport_(GO:0015744)	1/200	0.419254	0.419254	0.650941	0.650941	0.728168	-0.632981	VhaM9.7-b	GO_BP_autoRIF_predicted_zscore
proteolysis_(GO:0006508)	1/200	0.419254	0.419254	0.650941	0.650941	0.728234	-0.633037	tgo	GO_BP_autoRIF_predicted_zscore
sensory_perception_of_smell_(GO:0007608)	1/200	0.419254	0.419254	0.650941	0.650941	0.728942	-0.633653	SK	GO_BP_autoRIF_predicted_zscore
synaptic_target_recognition_(GO:0008039)	1/200	0.419254	0.419254	0.650941	0.650941	0.735739	-0.639562	tinc	GO_BP_autoRIF_predicted_zscore
regulation_of_ubiquitin-protein_transferase_activity_(GO:0051438)	1/200	0.419254	0.419254	0.650941	0.650941	0.739161	-0.642536	tgo	GO_BP_autoRIF_predicted_zscore
ribosome_localization_(GO:0033750)	1/200	0.419254	0.419254	0.650941	0.650941	0.739265	-0.642627	CG11180	GO_BP_autoRIF_predicted_zscore
regulation_of_transport_(GO:0051049)	1/200	0.419254	0.419254	0.650941	0.650941	0.744328	-0.647028	klar	GO_BP_autoRIF_predicted_zscore
regulation_of_smoothened_signaling_pathway_(GO:0008589)	1/200	0.419254	0.419254	0.650941	0.650941	0.757754	-0.658699	tgo	GO_BP_autoRIF_predicted_zscore
regulation_of_neurogenesis_(GO:0050767)	1/200	0.419254	0.419254	0.650941	0.650941	0.764488	-0.664553	tgo	GO_BP_autoRIF_predicted_zscore
snRNA_processing_(GO:0016180)	1/200	0.419254	0.419254	0.650941	0.650941	0.765565	-0.665489	CG3918	GO_BP_autoRIF_predicted_zscore
secretion_(GO:0046903)	1/200	0.419254	0.419254	0.650941	0.650941	0.770405	-0.669696	CG11151	GO_BP_autoRIF_predicted_zscore
regulation_of_cell_division_(GO:0051302)	1/200	0.419254	0.419254	0.650941	0.650941	0.776661	-0.675134	tgo	GO_BP_autoRIF_predicted_zscore
regulation_of_JAK-STAT_cascade_(GO:0046425)	1/200	0.419254	0.419254	0.650941	0.650941	0.780157	-0.678173	tgo	GO_BP_autoRIF_predicted_zscore
regulation_of_embryonic_cell_shape_(GO:0016476)	1/200	0.419254	0.419254	0.650941	0.650941	0.789612	-0.686393	tgo	GO_BP_autoRIF_predicted_zscore
regulation_of_small_GTPase_mediated_signal_transduction_(GO:0051056)	1/200	0.419254	0.419254	0.650941	0.650941	0.792568	-0.688962	CG2926	GO_BP_autoRIF_predicted_zscore
renal_tubule_development_(GO:0061326)	1/200	0.419254	0.419254	0.650941	0.650941	0.795095	-0.691158	rols	GO_BP_autoRIF_predicted_zscore
[truncated: 628 more rows]

## Sheet: 24h_Dlg5-IR_GO_cellComponent
Term	Overlap	P-value	Adjusted P-value	Old P-value	Old Adjusted P-value	Z-score	Combined Score	Genes	enrichR_category
striated_muscle_thin_filament_(GO:0005865)	6/200	1.6069e-05	0.00183186	0.00131197	0.149564	-43.1208	475.994	CG3630;Tm1;CG18304;Prm;sls;CG4945	GO_CC_geneRIF_predicted_zscore
striated_muscle_thin_filament_(GO:0005865)	6/200	1.6069e-05	0.00221752	0.000807261	0.111402	-47.2809	521.915	CG3630;Tm1;CG18304;Prm;sls;CG4945	GO_CC_autoRIF_predicted_zscore
focal adhesion (GO:0005925)	5/200	0.00020209	0.0073763	0.00229607	0.0838065	-1.40609	11.9614	klar;pigs;poe;Tm1;LamC	GO_CC_2018
muscle tendon junction (GO:0005927)	5/200	0.00020209	0.0073763	0.00229607	0.0838065	-1.39739	11.8873	klar;pigs;poe;Tm1;sls	GO_CC_2018
focal adhesion (GO:0005925)	5/200	0.00020209	0.0073763	0.00229607	0.0838065	-1.40609	11.9614	klar;pigs;poe;Tm1;LamC	GO_CC_coexpression_predicted
muscle tendon junction (GO:0005927)	5/200	0.00020209	0.0073763	0.00229607	0.0838065	-1.39739	11.8873	klar;pigs;poe;Tm1;sls	GO_CC_coexpression_predicted
contractile actin filament bundle (GO:0097517)	4/180	0.00141288	0.0257851	0.0101941	0.186043	-1.69894	11.1487	CG3630;Tm1;sls;LamC	GO_CC_2018
stress fiber (GO:0001725)	4/180	0.00141288	0.0257851	0.0101941	0.186043	-1.68657	11.0674	CG3630;Tm1;sls;LamC	GO_CC_2018
contractile actin filament bundle (GO:0097517)	4/180	0.00141288	0.0257851	0.0101941	0.186043	-1.69894	11.1487	CG3630;Tm1;sls;LamC	GO_CC_coexpression_predicted
stress fiber (GO:0001725)	4/180	0.00141288	0.0257851	0.0101941	0.186043	-1.68657	11.0674	CG3630;Tm1;sls;LamC	GO_CC_coexpression_predicted
striated muscle thin filament (GO:0005865)	4/200	0.00207664	0.0303189	0.0145276	0.212102	-1.24754	7.70603	CG3630;Msp300;Tm1;sls	GO_CC_2018
striated muscle thin filament (GO:0005865)	4/200	0.00207664	0.0303189	0.0145276	0.212102	-1.24754	7.70603	CG3630;Msp300;Tm1;sls	GO_CC_coexpression_predicted
vacuole_(GO:0005773)	4/190	0.00172258	0.0591841	0.0293627	0.717927	-6.91214	43.9884	NaPi-III;Sep4;SK;Drak	GO_CC_geneRIF_predicted_zscore
muscle_tendon_junction_(GO:0005927)	4/200	0.00207664	0.0591841	0.0344688	0.717927	0.281166	-1.73677	klar;rols;poe;CdGAPr	GO_CC_geneRIF_predicted_zscore
AP-2_adaptor_complex_(GO:0030122)	4/200	0.00207664	0.0591841	0.0344688	0.717927	1.47924	-9.13728	klar;Drak;CdGAPr;tinc	GO_CC_geneRIF_predicted_zscore
cytoplasmic_side_of_apical_plasma_membrane_(GO:0098592)	3/200	0.0168163	0.100898	0.126524	0.717927	-82.8241	338.37	klar;pigs;poe	GO_CC_geneRIF_predicted_zscore
polytene_chromosome_chromocenter_(GO:0005701)	3/200	0.0168163	0.100898	0.126524	0.717927	-46.4665	189.835	CG3918;CG11180;CG1677	GO_CC_geneRIF_predicted_zscore
chromocenter_(GO:0010369)	3/200	0.0168163	0.100898	0.126524	0.717927	-45.9817	187.854	CG3918;CG11180;CG1677	GO_CC_geneRIF_predicted_zscore
polysome_(GO:0005844)	3/200	0.0168163	0.100898	0.126524	0.717927	-45.9643	187.783	CG11180;CG1677;l(3)05822	GO_CC_geneRIF_predicted_zscore
PRC1_complex_(GO:0035102)	3/200	0.0168163	0.100898	0.126524	0.717927	-44.836	183.173	CG2926;CG1677;tgo	GO_CC_geneRIF_predicted_zscore
brahma_complex_(GO:0035060)	3/200	0.0168163	0.100898	0.126524	0.717927	-36.5353	149.262	CG3918;CG1677;tgo	GO_CC_geneRIF_predicted_zscore
synaptonemal_structure_(GO:0099086)	3/200	0.0168163	0.100898	0.126524	0.717927	-32.4999	132.775	CG11180;CG2926;l(3)05822	GO_CC_geneRIF_predicted_zscore
U1_snRNP_(GO:0005685)	3/200	0.0168163	0.100898	0.126524	0.717927	-25.3668	103.634	CG3918;CG1677;tgo	GO_CC_geneRIF_predicted_zscore
spectrosome_(GO:0045170)	3/200	0.0168163	0.100898	0.126524	0.717927	-24.786	101.261	CG2926;CG1677;l(3)05822	GO_CC_geneRIF_predicted_zscore
actin_cytoskeleton_(GO:0015629)	3/200	0.0168163	0.100898	0.126524	0.717927	-17.7359	72.4585	klar;poe;CG2926	GO_CC_geneRIF_predicted_zscore
intercalary_heterochromatin_(GO:0005725)	3/200	0.0168163	0.100898	0.126524	0.717927	-16.6909	68.1891	CG3918;CG1677;tgo	GO_CC_geneRIF_predicted_zscore
nuclear_proteasome_complex_(GO:0031595)	3/200	0.0168163	0.100898	0.126524	0.717927	-4.09891	16.7457	CG2926;CG1677;tgo	GO_CC_geneRIF_predicted_zscore
nuclear_transcription_factor_complex_(GO:0044798)	3/200	0.0168163	0.100898	0.126524	0.717927	-1.85944	7.59657	CG2926;CG1677;tgo	GO_CC_geneRIF_predicted_zscore
nuclear_chromatin_(GO:0000790)	3/200	0.0168163	0.100898	0.126524	0.717927	2.67442	-10.9261	CG3918;CG2926;CG1677	GO_CC_geneRIF_predicted_zscore
nuclear_DNA-directed_RNA_polymerase_complex_(GO:0055029)	3/200	0.0168163	0.100898	0.126524	0.717927	4.73167	-19.3308	CG3918;CG2926;CG1677	GO_CC_geneRIF_predicted_zscore
vitelline envelope (GO:0060388)	3/200	0.0168163	0.136399	0.0706635	0.573159	-1.64797	6.73262	Drak;CCT8;Usp5	GO_CC_2018
actin-based cell projection (GO:0098858)	3/200	0.0168163	0.136399	0.0706635	0.573159	-1.49989	6.12768	klar;salr;Drak	GO_CC_2018
cytoneme (GO:0035230)	3/200	0.0168163	0.136399	0.0706635	0.573159	-1.35229	5.52465	klar;salr;LamC	GO_CC_2018
filopodium (GO:0030175)	3/200	0.0168163	0.136399	0.0706635	0.573159	-1.3352	5.45483	klar;salr;Drak	GO_CC_2018
vitelline envelope (GO:0060388)	3/200	0.0168163	0.136399	0.0706635	0.573159	-1.64797	6.73262	Drak;CCT8;Usp5	GO_CC_coexpression_predicted
actin-based cell projection (GO:0098858)	3/200	0.0168163	0.136399	0.0706635	0.573159	-1.49989	6.12768	klar;salr;Drak	GO_CC_coexpression_predicted
cytoneme (GO:0035230)	3/200	0.0168163	0.136399	0.0706635	0.573159	-1.35229	5.52465	klar;salr;LamC	GO_CC_coexpression_predicted
filopodium (GO:0030175)	3/200	0.0168163	0.136399	0.0706635	0.573159	-1.3352	5.45483	klar;salr;Drak	GO_CC_coexpression_predicted
tricellular_tight_junction_(GO:0061689)	4/200	0.00207664	0.143288	0.0258236	0.686023	-49.9269	308.399	klar;rols;salr;tinc	GO_CC_autoRIF_predicted_zscore
polytene_chromosome_(GO:0005700)	3/200	0.0168163	0.178511	0.103743	0.686023	-66.8444	273.087	CG3918;CG1677;tgo	GO_CC_autoRIF_predicted_zscore
polytene_chromosome_interband_(GO:0005705)	3/200	0.0168163	0.178511	0.103743	0.686023	-53.657	219.211	CG3918;CG1677;tgo	GO_CC_autoRIF_predicted_zscore
polytene_chromosome_puff_(GO:0005703)	3/200	0.0168163	0.178511	0.103743	0.686023	-26.9464	110.087	CG3918;CG1677;tgo	GO_CC_autoRIF_predicted_zscore
PRC1_complex_(GO:0035102)	3/200	0.0168163	0.178511	0.103743	0.686023	-25.7206	105.079	CG3918;CG1677;tgo	GO_CC_autoRIF_predicted_zscore
Ino80_complex_(GO:0031011)	3/200	0.0168163	0.178511	0.103743	0.686023	-19.7971	80.8792	CG2926;CG1677;tgo	GO_CC_autoRIF_predicted_zscore
histone_methyltransferase_complex_(GO:0035097)	3/200	0.0168163	0.178511	0.103743	0.686023	-16.9949	69.4313	CG3918;CG1677;tgo	GO_CC_autoRIF_predicted_zscore
polytene_chromosome,_telomeric_region_(GO:0035012)	3/200	0.0168163	0.178511	0.103743	0.686023	-4.32159	17.6554	CG2926;CG1677;l(3)05822	GO_CC_autoRIF_predicted_zscore
sarcoplasmic_reticulum_(GO:0016529)	3/200	0.0168163	0.178511	0.103743	0.686023	-4.09827	16.7431	klar;pigs;poe	GO_CC_autoRIF_predicted_zscore
mitochondrial_respiratory_chain_complex_III_(GO:0005750)	3/200	0.0168163	0.178511	0.103743	0.686023	-2.86031	11.6855	CG3630;CG18304;CG4945	GO_CC_autoRIF_predicted_zscore
inner_dynein_arm_(GO:0036156)	3/200	0.0168163	0.178511	0.103743	0.686023	-1.2995	5.30899	klar;rols;tinc	GO_CC_autoRIF_predicted_zscore
muscle_tendon_junction_(GO:0005927)	3/200	0.0168163	0.178511	0.103743	0.686023	0.997317	-4.07445	klar;rols;poe	GO_CC_autoRIF_predicted_zscore
actomyosin (GO:0042641)	2/101	0.0304787	0.222494	0.0864192	0.630236	-1.80712	6.30816	CG3630;LamC	GO_CC_2018
actomyosin (GO:0042641)	2/101	0.0304787	0.222494	0.0864192	0.630236	-1.80712	6.30816	CG3630;LamC	GO_CC_coexpression_predicted
cytoneme_(GO:0035230)	2/200	0.101634	0.231725	0.354166	0.717927	-119.352	272.885	klar;rols	GO_CC_geneRIF_predicted_zscore
large_ribosomal_subunit_(GO:0015934)	2/195	0.0974133	0.231725	0.342807	0.717927	-87.8699	204.631	CG3918;CG11180	GO_CC_geneRIF_predicted_zscore
histone_locus_body_(GO:0035363)	2/200	0.101634	0.231725	0.354166	0.717927	-77.2743	176.678	CG3918;CG11180	GO_CC_geneRIF_predicted_zscore
chromosomal_region_(GO:0098687)	2/200	0.101634	0.231725	0.354166	0.717927	-76.7302	175.434	CG3918;CG11180	GO_CC_geneRIF_predicted_zscore
histone_methyltransferase_complex_(GO:0035097)	2/200	0.101634	0.231725	0.354166	0.717927	-51.6994	118.204	CG2926;CG1677	GO_CC_geneRIF_predicted_zscore
histone_acetyltransferase_complex_(GO:0000123)	2/200	0.101634	0.231725	0.354166	0.717927	-48.4225	110.712	CG3918;tgo	GO_CC_geneRIF_predicted_zscore
P-body_(GO:0000932)	2/200	0.101634	0.231725	0.354166	0.717927	-31.8903	72.9134	CG3918;CG11180	GO_CC_geneRIF_predicted_zscore
sarcoplasmic_reticulum_(GO:0016529)	2/200	0.101634	0.231725	0.354166	0.717927	-30.3757	69.4505	CG3630;poe	GO_CC_geneRIF_predicted_zscore
polytene_chromosome_band_(GO:0005704)	2/200	0.101634	0.231725	0.354166	0.717927	-26.9768	61.6793	CG2926;CG1677	GO_CC_geneRIF_predicted_zscore
protein_kinase_complex_(GO:1902911)	2/200	0.101634	0.231725	0.354166	0.717927	-26.1922	59.8853	CG2926;tgo	GO_CC_geneRIF_predicted_zscore
gamma-tubulin_large_complex_(GO:0000931)	2/200	0.101634	0.231725	0.354166	0.717927	-22.58	51.6265	CG2926;CG1677	GO_CC_geneRIF_predicted_zscore
focal_adhesion_(GO:0005925)	2/200	0.101634	0.231725	0.354166	0.717927	-16.9324	38.7139	klar;rols	GO_CC_geneRIF_predicted_zscore
actin_filament_(GO:0005884)	2/200	0.101634	0.231725	0.354166	0.717927	-15.6285	35.7328	klar;poe	GO_CC_geneRIF_predicted_zscore
NuRD_complex_(GO:0016581)	2/200	0.101634	0.231725	0.354166	0.717927	-14.9521	34.1862	CG2926;CG1677	GO_CC_geneRIF_predicted_zscore
transcriptionally_active_chromatin_(GO:0035327)	2/200	0.101634	0.231725	0.354166	0.717927	-13.6656	31.2447	CG2926;CG1677	GO_CC_geneRIF_predicted_zscore
MIS_complex_(GO:0036396)	2/200	0.101634	0.231725	0.354166	0.717927	-11.6158	26.5583	CG1677;tgo	GO_CC_geneRIF_predicted_zscore
core_mediator_complex_(GO:0070847)	2/200	0.101634	0.231725	0.354166	0.717927	-11.2936	25.8215	CG3918;tgo	GO_CC_geneRIF_predicted_zscore
RISC_complex_(GO:0016442)	2/200	0.101634	0.231725	0.354166	0.717927	-10.6538	24.3586	CG3918;CG11180	GO_CC_geneRIF_predicted_zscore
sex_chromosome_(GO:0000803)	2/200	0.101634	0.231725	0.354166	0.717927	-10.6103	24.2591	CG2926;CG1677	GO_CC_geneRIF_predicted_zscore
ER_to_Golgi_transport_vesicle_membrane_(GO:0012507)	2/200	0.101634	0.231725	0.354166	0.717927	-6.5949	15.0785	CG5174;CG4822	GO_CC_geneRIF_predicted_zscore
mitochondrial_respiratory_chain_complex_III_(GO:0005750)	2/200	0.101634	0.231725	0.354166	0.717927	-4.08678	9.34394	CG3630;CG4945	GO_CC_geneRIF_predicted_zscore
type_I_terminal_bouton_(GO:0061174)	2/200	0.101634	0.231725	0.354166	0.717927	-1.09539	2.50448	Sep4;SK	GO_CC_geneRIF_predicted_zscore
type_Is_terminal_bouton_(GO:0061177)	2/200	0.101634	0.231725	0.354166	0.717927	-1.06981	2.44599	Sep4;SK	GO_CC_geneRIF_predicted_zscore
stress_fiber_(GO:0001725)	2/200	0.101634	0.231725	0.354166	0.717927	-0.816545	1.86693	Sep4;tinc	GO_CC_geneRIF_predicted_zscore
nuclear_lumen_(GO:0031981)	2/200	0.101634	0.231725	0.354166	0.717927	0.761633	-1.74138	CG12384;Arf102F	GO_CC_geneRIF_predicted_zscore
nucleolus_(GO:0005730)	2/200	0.101634	0.231725	0.354166	0.717927	1.96727	-4.49793	CG3918;CG11180	GO_CC_geneRIF_predicted_zscore
nuclear_nucleosome_(GO:0000788)	2/200	0.101634	0.231725	0.354166	0.717927	14.1035	-32.2459	CG2926;CG1677	GO_CC_geneRIF_predicted_zscore
nuclear_periphery_(GO:0034399)	2/200	0.101634	0.231725	0.354166	0.717927	14.1035	-32.2459	CG3918;CG1677	GO_CC_geneRIF_predicted_zscore
nuclear_euchromatin_(GO:0005719)	2/200	0.101634	0.231725	0.354166	0.717927	17.0752	-39.0404	CG3918;CG1677	GO_CC_geneRIF_predicted_zscore
nuclear_exosome_(RNase_complex)_(GO:0000176)	2/200	0.101634	0.231725	0.354166	0.717927	17.0752	-39.0404	CG3918;CG1677	GO_CC_geneRIF_predicted_zscore
nuclear_chromosome_(GO:0000228)	2/200	0.101634	0.231725	0.354166	0.717927	17.7609	-40.6082	CG2926;CG1677	GO_CC_geneRIF_predicted_zscore
intercalary heterochromatin (GO:0005725)	1/35	0.0903619	0.273818	0.160041	0.630236	-1.89642	4.55888	CG2926	GO_CC_2018
box C/D snoRNP complex (GO:0031428)	1/41	0.105026	0.273818	0.184232	0.630236	-1.67526	3.77528	CCT8	GO_CC_2018
cytoskeleton (GO:0005856)	2/138	0.0535799	0.273818	0.144278	0.630236	-1.27008	3.71699	klar;poe	GO_CC_2018
proton-transporting V-type ATPase, V1 domain (GO:0033180)	2/200	0.101634	0.273818	0.253467	0.630236	-1.57895	3.61009	Sep4;CG11151	GO_CC_2018
ELL-EAF complex (GO:0032783)	2/130	0.0481743	0.273818	0.131106	0.630236	-1.18479	3.59339	CG2926;CG1677	GO_CC_2018
sarcoplasm (GO:0016528)	2/137	0.0528927	0.273818	0.142615	0.630236	-1.14167	3.35592	CG3630;sls	GO_CC_2018
septate junction (GO:0005918)	2/200	0.101634	0.273818	0.253467	0.630236	-1.43844	3.28881	klar;salr	GO_CC_2018
cytoplasmic stress granule (GO:0010494)	1/36	0.0928222	0.273818	0.16412	0.630236	-1.35906	3.23057	CG2926	GO_CC_2018
vacuolar proton-transporting V-type ATPase, V1 domain (GO:0000221)	2/200	0.101634	0.273818	0.253467	0.630236	-1.36566	3.12242	Sep4;CG11151	GO_CC_2018
rhabdomere (GO:0016028)	2/200	0.101634	0.273818	0.253467	0.630236	-1.33772	3.05854	NaPi-III;Sep4	GO_CC_2018
oxoglutarate dehydrogenase complex (GO:0045252)	2/200	0.101634	0.273818	0.253467	0.630236	-1.33394	3.0499	CG3630;sls	GO_CC_2018
mitochondrial proton-transporting ATP synthase complex, catalytic core F(1) (GO:0000275)	2/200	0.101634	0.273818	0.253467	0.630236	-1.3205	3.01918	CG3630;Tm1	GO_CC_2018
type I terminal bouton (GO:0061174)	2/200	0.101634	0.273818	0.253467	0.630236	-1.17217	2.68002	NaPi-III;Sep4	GO_CC_2018
pleated septate junction (GO:0005919)	2/200	0.101634	0.273818	0.253467	0.630236	-1.16966	2.6743	klar;salr	GO_CC_2018
sarcoplasmic reticulum (GO:0016529)	2/200	0.101634	0.273818	0.253467	0.630236	-1.11188	2.54218	CG3630;sls	GO_CC_2018
smooth septate junction (GO:0005920)	2/200	0.101634	0.273818	0.253467	0.630236	-1.07212	2.45128	klar;LamC	GO_CC_2018
mitochondrial alpha-ketoglutarate dehydrogenase complex (GO:0005947)	2/200	0.101634	0.273818	0.253467	0.630236	-1.04354	2.38594	CG3630;CG11151	GO_CC_2018
microvillus (GO:0005902)	2/200	0.101634	0.273818	0.253467	0.630236	-1.01149	2.31266	klar;salr	GO_CC_2018
intercalary heterochromatin (GO:0005725)	1/35	0.0903619	0.273818	0.160041	0.630236	-1.89642	4.55888	CG2926	GO_CC_coexpression_predicted
box C/D snoRNP complex (GO:0031428)	1/41	0.105026	0.273818	0.184232	0.630236	-1.67526	3.77528	CCT8	GO_CC_coexpression_predicted
cytoskeleton (GO:0005856)	2/138	0.0535799	0.273818	0.144278	0.630236	-1.27008	3.71699	klar;poe	GO_CC_coexpression_predicted
proton-transporting V-type ATPase, V1 domain (GO:0033180)	2/200	0.101634	0.273818	0.253467	0.630236	-1.57895	3.61009	Sep4;CG11151	GO_CC_coexpression_predicted
ELL-EAF complex (GO:0032783)	2/130	0.0481743	0.273818	0.131106	0.630236	-1.18479	3.59339	CG2926;CG1677	GO_CC_coexpression_predicted
sarcoplasm (GO:0016528)	2/137	0.0528927	0.273818	0.142615	0.630236	-1.14167	3.35592	CG3630;sls	GO_CC_coexpression_predicted
septate junction (GO:0005918)	2/200	0.101634	0.273818	0.253467	0.630236	-1.43844	3.28881	klar;salr	GO_CC_coexpression_predicted
cytoplasmic stress granule (GO:0010494)	1/36	0.0928222	0.273818	0.16412	0.630236	-1.35906	3.23057	CG2926	GO_CC_coexpression_predicted
vacuolar proton-transporting V-type ATPase, V1 domain (GO:0000221)	2/200	0.101634	0.273818	0.253467	0.630236	-1.36566	3.12242	Sep4;CG11151	GO_CC_coexpression_predicted
rhabdomere (GO:0016028)	2/200	0.101634	0.273818	0.253467	0.630236	-1.33772	3.05854	NaPi-III;Sep4	GO_CC_coexpression_predicted
oxoglutarate dehydrogenase complex (GO:0045252)	2/200	0.101634	0.273818	0.253467	0.630236	-1.33394	3.0499	CG3630;sls	GO_CC_coexpression_predicted
mitochondrial proton-transporting ATP synthase complex, catalytic core F(1) (GO:0000275)	2/200	0.101634	0.273818	0.253467	0.630236	-1.3205	3.01918	CG3630;Tm1	GO_CC_coexpression_predicted
type I terminal bouton (GO:0061174)	2/200	0.101634	0.273818	0.253467	0.630236	-1.17217	2.68002	NaPi-III;Sep4	GO_CC_coexpression_predicted
pleated septate junction (GO:0005919)	2/200	0.101634	0.273818	0.253467	0.630236	-1.16966	2.6743	klar;salr	GO_CC_coexpression_predicted
sarcoplasmic reticulum (GO:0016529)	2/200	0.101634	0.273818	0.253467	0.630236	-1.11188	2.54218	CG3630;sls	GO_CC_coexpression_predicted
smooth septate junction (GO:0005920)	2/200	0.101634	0.273818	0.253467	0.630236	-1.07212	2.45128	klar;LamC	GO_CC_coexpression_predicted
mitochondrial alpha-ketoglutarate dehydrogenase complex (GO:0005947)	2/200	0.101634	0.273818	0.253467	0.630236	-1.04354	2.38594	CG3630;CG11151	GO_CC_coexpression_predicted
microvillus (GO:0005902)	2/200	0.101634	0.273818	0.253467	0.630236	-1.01149	2.31266	klar;salr	GO_CC_coexpression_predicted
perinuclear_endoplasmic_reticulum_(GO:0097038)	2/181	0.0858837	0.280509	0.275284	0.686023	-88.943	218.334	CG2926;l(3)05822	GO_CC_autoRIF_predicted_zscore
autophagosome_membrane_(GO:0000421)	1/36	0.0928222	0.280509	0.189047	0.686023	-43.097	102.445	CG5174	GO_CC_autoRIF_predicted_zscore
polytene_chromosome_band_(GO:0005704)	2/200	0.101634	0.280509	0.315437	0.686023	-42.3348	96.7934	CG3918;tgo	GO_CC_autoRIF_predicted_zscore
cytoplasmic_U_snRNP_body_(GO:0071254)	2/200	0.101634	0.280509	0.315437	0.686023	-41.8973	95.7932	CG3918;CG11180	GO_CC_autoRIF_predicted_zscore
polytene_chromosome_chromocenter_(GO:0005701)	2/200	0.101634	0.280509	0.315437	0.686023	-41.5104	94.9086	CG3918;tgo	GO_CC_autoRIF_predicted_zscore
cytosolic_ribosome_(GO:0022626)	2/200	0.101634	0.280509	0.315437	0.686023	-36.8014	84.1419	CG5174;CCT8	GO_CC_autoRIF_predicted_zscore
peroxisome_(GO:0005777)	2/200	0.101634	0.280509	0.315437	0.686023	-36.5582	83.586	klar;CCT8	GO_CC_autoRIF_predicted_zscore
COPI-coated_vesicle_membrane_(GO:0030663)	2/200	0.101634	0.280509	0.315437	0.686023	-36.4408	83.3176	CG5174;CG4822	GO_CC_autoRIF_predicted_zscore
ER_to_Golgi_transport_vesicle_membrane_(GO:0012507)	2/200	0.101634	0.280509	0.315437	0.686023	-35.0735	80.1914	CG5174;CG4822	GO_CC_autoRIF_predicted_zscore
sensory_dendrite_(GO:0071683)	2/200	0.101634	0.280509	0.315437	0.686023	-34.3786	78.6025	klar;tinc	GO_CC_autoRIF_predicted_zscore
core_mediator_complex_(GO:0070847)	2/200	0.101634	0.280509	0.315437	0.686023	-27.7723	63.4981	CG3918;tgo	GO_CC_autoRIF_predicted_zscore
RNA_polymerase_II_transcription_factor_complex_(GO:0090575)	2/200	0.101634	0.280509	0.315437	0.686023	-27.4772	62.8233	CG3918;tgo	GO_CC_autoRIF_predicted_zscore
small_ribosomal_subunit_(GO:0015935)	2/174	0.0802887	0.280509	0.260477	0.686023	-24.4116	61.5692	CG3918;CG11180	GO_CC_autoRIF_predicted_zscore
dystrophin-associated_glycoprotein_complex_(GO:0016010)	2/200	0.101634	0.280509	0.315437	0.686023	-25.7776	58.9375	pigs;poe	GO_CC_autoRIF_predicted_zscore
Cul2-RING_ubiquitin_ligase_complex_(GO:0031462)	2/200	0.101634	0.280509	0.315437	0.686023	-23.9994	54.8717	CG5174;CkIIalpha	GO_CC_autoRIF_predicted_zscore
chromocenter_(GO:0010369)	2/200	0.101634	0.280509	0.315437	0.686023	-20.6965	47.3202	CG3918;tgo	GO_CC_autoRIF_predicted_zscore
DNA-directed_RNA_polymerase_complex_(GO:0000428)	2/200	0.101634	0.280509	0.315437	0.686023	-19.2088	43.9186	CG3918;tgo	GO_CC_autoRIF_predicted_zscore
DNA-directed_RNA_polymerase_I_complex_(GO:0005736)	2/200	0.101634	0.280509	0.315437	0.686023	-18.7671	42.9088	CG3918;tgo	GO_CC_autoRIF_predicted_zscore
synaptonemal_structure_(GO:0099086)	2/200	0.101634	0.280509	0.315437	0.686023	-18.5134	42.3288	CG3918;CG11180	GO_CC_autoRIF_predicted_zscore
U1_snRNP_(GO:0005685)	2/200	0.101634	0.280509	0.315437	0.686023	-18.0359	41.2369	CG3918;tgo	GO_CC_autoRIF_predicted_zscore
NuRD_complex_(GO:0016581)	2/200	0.101634	0.280509	0.315437	0.686023	-17.7331	40.5445	CG3918;tgo	GO_CC_autoRIF_predicted_zscore
commitment_complex_(GO:0000243)	2/200	0.101634	0.280509	0.315437	0.686023	-17.0446	38.9704	CG3918;tgo	GO_CC_autoRIF_predicted_zscore
MLL3/4_complex_(GO:0044666)	2/200	0.101634	0.280509	0.315437	0.686023	-15.4668	35.363	CG1677;tgo	GO_CC_autoRIF_predicted_zscore
chromosome,_telomeric_region_(GO:0000781)	2/200	0.101634	0.280509	0.315437	0.686023	-14.2824	32.6551	CG3918;tgo	GO_CC_autoRIF_predicted_zscore
serine/threonine_protein_kinase_complex_(GO:1902554)	2/200	0.101634	0.280509	0.315437	0.686023	-12.1414	27.7598	CG1677;tgo	GO_CC_autoRIF_predicted_zscore
brahma_complex_(GO:0035060)	2/200	0.101634	0.280509	0.315437	0.686023	-10.0617	23.005	CG3918;tgo	GO_CC_autoRIF_predicted_zscore
chloride_channel_complex_(GO:0034707)	2/200	0.101634	0.280509	0.315437	0.686023	-5.93959	13.5802	Sep4;SK	GO_CC_autoRIF_predicted_zscore
intercalary_heterochromatin_(GO:0005725)	2/200	0.101634	0.280509	0.315437	0.686023	-2.94149	6.72537	CG3918;tgo	GO_CC_autoRIF_predicted_zscore
plasma_membrane_respiratory_chain_complex_I_(GO:0045272)	2/200	0.101634	0.280509	0.315437	0.686023	-1.87336	4.28321	NaPi-III;Sep4	GO_CC_autoRIF_predicted_zscore
transcription_factor_TFIID_complex_(GO:0005669)	2/200	0.101634	0.280509	0.315437	0.686023	-1.4773	3.37767	CG3918;tgo	GO_CC_autoRIF_predicted_zscore
histone_locus_body_(GO:0035363)	2/200	0.101634	0.280509	0.315437	0.686023	-0.428074	0.978741	CG3918;CG11180	GO_CC_autoRIF_predicted_zscore
histone_acetyltransferase_complex_(GO:0000123)	2/200	0.101634	0.280509	0.315437	0.686023	-0.243082	0.555778	CG3918;tgo	GO_CC_autoRIF_predicted_zscore
nucleolus_(GO:0005730)	2/200	0.101634	0.280509	0.315437	0.686023	0.796812	-1.82181	CG3918;CG11180	GO_CC_autoRIF_predicted_zscore
mitochondrial_respiratory_chain_complex_II,_succinate_dehydrogenase_complex_(ubiquinone)_(GO:0005749)	2/200	0.101634	0.280509	0.315437	0.686023	1.26219	-2.88585	CG3630;CG31313	GO_CC_autoRIF_predicted_zscore
nuclear_ubiquitin_ligase_complex_(GO:0000152)	2/200	0.101634	0.280509	0.315437	0.686023	2.03497	-4.65271	CG3918;tgo	GO_CC_autoRIF_predicted_zscore
nuclear_lamina_(GO:0005652)	2/200	0.101634	0.280509	0.315437	0.686023	11.2464	-25.7137	CG3918;tgo	GO_CC_autoRIF_predicted_zscore
nuclear_DNA-directed_RNA_polymerase_complex_(GO:0055029)	2/200	0.101634	0.280509	0.315437	0.686023	24.9899	-57.1364	CG3918;tgo	GO_CC_autoRIF_predicted_zscore
sex chromosome (GO:0000803)	1/58	0.145327	0.365822	0.249241	0.630236	-1.4394	2.77627	tgo	GO_CC_2018
sex chromosome (GO:0000803)	1/58	0.145327	0.365822	0.249241	0.630236	-1.4394	2.77627	tgo	GO_CC_coexpression_predicted
phagocytic_vesicle_(GO:0045335)	1/54	0.136008	0.36802	0.268075	0.686023	-72.7693	145.178	CG5174	GO_CC_autoRIF_predicted_zscore
actin cytoskeleton (GO:0015629)	1/79	0.192657	0.419254	0.322779	0.630236	-1.36651	2.25043	Tm1	GO_CC_2018
chaperonin-containing T-complex (GO:0005832)	1/86	0.207855	0.419254	0.345737	0.630236	-1.29883	2.04035	CCT8	GO_CC_2018
zonula adherens (GO:0005915)	1/75	0.183845	0.419254	0.30932	0.630236	-1.19129	2.01765	CG2926	GO_CC_2018
multi-eIF complex (GO:0043614)	1/88	0.212145	0.419254	0.352159	0.630236	-1.28519	1.99266	CCT8	GO_CC_2018
acroblast (GO:0036063)	1/99	0.235337	0.419254	0.386429	0.630236	-1.18335	1.71199	CCT8	GO_CC_2018
eukaryotic 43S preinitiation complex (GO:0016282)	1/104	0.245656	0.419254	0.401432	0.630236	-1.17318	1.64693	CCT8	GO_CC_2018
translation preinitiation complex (GO:0070993)	1/101	0.239481	0.419254	0.392473	0.630236	-0.928874	1.32762	CCT8	GO_CC_2018
nuclear proteasome complex (GO:0031595)	1/142	0.31974	0.419254	0.504615	0.630236	-1.10132	1.25577	CkIIalpha	GO_CC_2018
female germline ring canal (GO:0035324)	1/119	0.275801	0.419254	0.444383	0.630236	-0.959911	1.23644	poe	GO_CC_2018
peroxisomal part (GO:0044439)	1/137	0.310416	0.419254	0.492073	0.630236	-0.990117	1.15828	CG11151	GO_CC_2018
mitochondrial proton-transporting ATP synthase complex, coupling factor F(o) (GO:0000276)	1/144	0.323435	0.419254	0.50955	0.630236	-0.983225	1.10982	CG3630	GO_CC_2018
cytosolic proteasome complex (GO:0031597)	1/160	0.352292	0.419254	0.547382	0.630236	-1.06265	1.10866	CkIIalpha	GO_CC_2018
proton-transporting V-type ATPase complex (GO:0033176)	1/148	0.330765	0.419254	0.519279	0.630236	-0.991434	1.09687	CG11151	GO_CC_2018
peroxisomal membrane (GO:0005778)	1/137	0.310416	0.419254	0.492073	0.630236	-0.910057	1.06462	CG11151	GO_CC_2018
anchored component of plasma membrane (GO:0046658)	1/153	0.339819	0.419254	0.531184	0.630236	-0.920732	0.993786	salr	GO_CC_2018
spectrosome (GO:0045170)	1/168	0.366264	0.419254	0.565244	0.630236	-0.969052	0.973316	klar	GO_CC_2018
phagocytic vesicle (GO:0045335)	1/167	0.364534	0.419254	0.563049	0.630236	-0.918725	0.927118	pigs	GO_CC_2018
fusome (GO:0045169)	1/200	0.419254	0.419254	0.630236	0.630236	-0.945367	0.821786	poe	GO_CC_2018
acetylcholine-gated channel complex (GO:0005892)	1/200	0.419254	0.419254	0.630236	0.630236	-0.938451	0.815775	Sep4	GO_CC_2018
dystrophin-associated glycoprotein complex (GO:0016010)	1/200	0.419254	0.419254	0.630236	0.630236	-0.930929	0.809236	Sep4	GO_CC_2018
endocytic vesicle (GO:0030139)	1/179	0.384994	0.419254	0.588718	0.630236	-0.844791	0.806377	pigs	GO_CC_2018
mitochondrial respiratory chain complex I (GO:0005747)	1/180	0.386669	0.419254	0.590791	0.630236	-0.838245	0.796488	CG3630	GO_CC_2018
endoplasmic reticulum subcompartment (GO:0098827)	1/200	0.419254	0.419254	0.630236	0.630236	-0.861827	0.749167	NaPi-III	GO_CC_2018
ionotropic glutamate receptor complex (GO:0008328)	1/200	0.419254	0.419254	0.630236	0.630236	-0.853528	0.741953	Sep4	GO_CC_2018
integral component of plasma membrane (GO:0005887)	1/200	0.419254	0.419254	0.630236	0.630236	-0.794672	0.690791	Sep4	GO_CC_2018
microvillus membrane (GO:0031528)	1/200	0.419254	0.419254	0.630236	0.630236	-0.784132	0.681628	NaPi-III	GO_CC_2018
microbody (GO:0042579)	1/200	0.419254	0.419254	0.630236	0.630236	-0.771321	0.670492	CG11151	GO_CC_2018
neurotransmitter receptor complex (GO:0098878)	1/200	0.419254	0.419254	0.630236	0.630236	-0.722626	0.628162	Sep4	GO_CC_2018
perinuclear endoplasmic reticulum (GO:0097038)	1/200	0.419254	0.419254	0.630236	0.630236	-0.722542	0.62809	pigs	GO_CC_2018
axonal growth cone (GO:0044295)	1/200	0.419254	0.419254	0.630236	0.630236	-0.714822	0.621379	Sep4	GO_CC_2018
inaD signaling complex (GO:0016027)	1/200	0.419254	0.419254	0.630236	0.630236	-0.709844	0.617052	NaPi-III	GO_CC_2018
peroxisome (GO:0005777)	1/200	0.419254	0.419254	0.630236	0.630236	-0.708325	0.615731	CG11151	GO_CC_2018
mitochondrial respiratory chain complex III (GO:0005750)	1/200	0.419254	0.419254	0.630236	0.630236	-0.703517	0.611552	CG3630	GO_CC_2018
lipid droplet (GO:0005811)	1/200	0.419254	0.419254	0.630236	0.630236	-0.701342	0.609661	CG11151	GO_CC_2018
mitochondrial proton-transporting ATP synthase complex (GO:0005753)	1/200	0.419254	0.419254	0.630236	0.630236	-0.668316	0.580952	CG3630	GO_CC_2018
rhabdomere microvillus (GO:0035996)	1/200	0.419254	0.419254	0.630236	0.630236	-0.658694	0.572588	NaPi-III	GO_CC_2018
type Is terminal bouton (GO:0061177)	1/200	0.419254	0.419254	0.630236	0.630236	-0.63744	0.554113	Sep4	GO_CC_2018
sensory dendrite (GO:0071683)	1/200	0.419254	0.419254	0.630236	0.630236	-0.630729	0.548279	NaPi-III	GO_CC_2018
mitochondrial respiratory chain complex II, succinate dehydrogenase complex (ubiquinone) (GO:0005749)	1/200	0.419254	0.419254	0.630236	0.630236	-0.609378	0.529719	CG3630	GO_CC_2018
plasma membrane proton-transporting V-type ATPase complex (GO:0033181)	1/200	0.419254	0.419254	0.630236	0.630236	-0.605708	0.526528	CG11151	GO_CC_2018
type Ib terminal bouton (GO:0061176)	1/200	0.419254	0.419254	0.630236	0.630236	-0.582284	0.506166	Sep4	GO_CC_2018
tricellular tight junction (GO:0061689)	1/200	0.419254	0.419254	0.630236	0.630236	-0.566318	0.492288	klar	GO_CC_2018
rhabdomere membrane (GO:0033583)	1/200	0.419254	0.419254	0.630236	0.630236	-0.556858	0.484064	NaPi-III	GO_CC_2018
unconventional myosin complex (GO:0016461)	1/200	0.419254	0.419254	0.630236	0.630236	-0.385615	0.335206	salr	GO_CC_2018
actin cytoskeleton (GO:0015629)	1/79	0.192657	0.419254	0.322779	0.630236	-1.36651	2.25043	Tm1	GO_CC_coexpression_predicted
chaperonin-containing T-complex (GO:0005832)	1/86	0.207855	0.419254	0.345737	0.630236	-1.29883	2.04035	CCT8	GO_CC_coexpression_predicted
zonula adherens (GO:0005915)	1/75	0.183845	0.419254	0.30932	0.630236	-1.19129	2.01765	CG2926	GO_CC_coexpression_predicted
multi-eIF complex (GO:0043614)	1/88	0.212145	0.419254	0.352159	0.630236	-1.28519	1.99266	CCT8	GO_CC_coexpression_predicted
acroblast (GO:0036063)	1/99	0.235337	0.419254	0.386429	0.630236	-1.18335	1.71199	CCT8	GO_CC_coexpression_predicted
eukaryotic 43S preinitiation complex (GO:0016282)	1/104	0.245656	0.419254	0.401432	0.630236	-1.17318	1.64693	CCT8	GO_CC_coexpression_predicted
translation preinitiation complex (GO:0070993)	1/101	0.239481	0.419254	0.392473	0.630236	-0.928874	1.32762	CCT8	GO_CC_coexpression_predicted
nuclear proteasome complex (GO:0031595)	1/142	0.31974	0.419254	0.504615	0.630236	-1.10132	1.25577	CkIIalpha	GO_CC_coexpression_predicted
female germline ring canal (GO:0035324)	1/119	0.275801	0.419254	0.444383	0.630236	-0.959911	1.23644	poe	GO_CC_coexpression_predicted
peroxisomal part (GO:0044439)	1/137	0.310416	0.419254	0.492073	0.630236	-0.990117	1.15828	CG11151	GO_CC_coexpression_predicted
mitochondrial proton-transporting ATP synthase complex, coupling factor F(o) (GO:0000276)	1/144	0.323435	0.419254	0.50955	0.630236	-0.983225	1.10982	CG3630	GO_CC_coexpression_predicted
cytosolic proteasome complex (GO:0031597)	1/160	0.352292	0.419254	0.547382	0.630236	-1.06265	1.10866	CkIIalpha	GO_CC_coexpression_predicted
proton-transporting V-type ATPase complex (GO:0033176)	1/148	0.330765	0.419254	0.519279	0.630236	-0.991434	1.09687	CG11151	GO_CC_coexpression_predicted
peroxisomal membrane (GO:0005778)	1/137	0.310416	0.419254	0.492073	0.630236	-0.910057	1.06462	CG11151	GO_CC_coexpression_predicted
anchored component of plasma membrane (GO:0046658)	1/153	0.339819	0.419254	0.531184	0.630236	-0.920732	0.993786	salr	GO_CC_coexpression_predicted
spectrosome (GO:0045170)	1/168	0.366264	0.419254	0.565244	0.630236	-0.969052	0.973316	klar	GO_CC_coexpression_predicted
phagocytic vesicle (GO:0045335)	1/167	0.364534	0.419254	0.563049	0.630236	-0.918725	0.927118	pigs	GO_CC_coexpression_predicted
fusome (GO:0045169)	1/200	0.419254	0.419254	0.630236	0.630236	-0.945367	0.821786	poe	GO_CC_coexpression_predicted
acetylcholine-gated channel complex (GO:0005892)	1/200	0.419254	0.419254	0.630236	0.630236	-0.938451	0.815775	Sep4	GO_CC_coexpression_predicted
dystrophin-associated glycoprotein complex (GO:0016010)	1/200	0.419254	0.419254	0.630236	0.630236	-0.930929	0.809236	Sep4	GO_CC_coexpression_predicted
endocytic vesicle (GO:0030139)	1/179	0.384994	0.419254	0.588718	0.630236	-0.844791	0.806377	pigs	GO_CC_coexpression_predicted
mitochondrial respiratory chain complex I (GO:0005747)	1/180	0.386669	0.419254	0.590791	0.630236	-0.838245	0.796488	CG3630	GO_CC_coexpression_predicted
endoplasmic reticulum subcompartment (GO:0098827)	1/200	0.419254	0.419254	0.630236	0.630236	-0.861827	0.749167	NaPi-III	GO_CC_coexpression_predicted
ionotropic glutamate receptor complex (GO:0008328)	1/200	0.419254	0.419254	0.630236	0.630236	-0.853528	0.741953	Sep4	GO_CC_coexpression_predicted
integral component of plasma membrane (GO:0005887)	1/200	0.419254	0.419254	0.630236	0.630236	-0.794672	0.690791	Sep4	GO_CC_coexpression_predicted
microvillus membrane (GO:0031528)	1/200	0.419254	0.419254	0.630236	0.630236	-0.784132	0.681628	NaPi-III	GO_CC_coexpression_predicted
microbody (GO:0042579)	1/200	0.419254	0.419254	0.630236	0.630236	-0.771321	0.670492	CG11151	GO_CC_coexpression_predicted
neurotransmitter receptor complex (GO:0098878)	1/200	0.419254	0.419254	0.630236	0.630236	-0.722626	0.628162	Sep4	GO_CC_coexpression_predicted
perinuclear endoplasmic reticulum (GO:0097038)	1/200	0.419254	0.419254	0.630236	0.630236	-0.722542	0.62809	pigs	GO_CC_coexpression_predicted
axonal growth cone (GO:0044295)	1/200	0.419254	0.419254	0.630236	0.630236	-0.714822	0.621379	Sep4	GO_CC_coexpression_predicted
inaD signaling complex (GO:0016027)	1/200	0.419254	0.419254	0.630236	0.630236	-0.709844	0.617052	NaPi-III	GO_CC_coexpression_predicted
peroxisome (GO:0005777)	1/200	0.419254	0.419254	0.630236	0.630236	-0.708325	0.615731	CG11151	GO_CC_coexpression_predicted
mitochondrial respiratory chain complex III (GO:0005750)	1/200	0.419254	0.419254	0.630236	0.630236	-0.703517	0.611552	CG3630	GO_CC_coexpression_predicted
lipid droplet (GO:0005811)	1/200	0.419254	0.419254	0.630236	0.630236	-0.701342	0.609661	CG11151	GO_CC_coexpression_predicted
mitochondrial proton-transporting ATP synthase complex (GO:0005753)	1/200	0.419254	0.419254	0.630236	0.630236	-0.668316	0.580952	CG3630	GO_CC_coexpression_predicted
rhabdomere microvillus (GO:0035996)	1/200	0.419254	0.419254	0.630236	0.630236	-0.658694	0.572588	NaPi-III	GO_CC_coexpression_predicted
type Is terminal bouton (GO:0061177)	1/200	0.419254	0.419254	0.630236	0.630236	-0.63744	0.554113	Sep4	GO_CC_coexpression_predicted
sensory dendrite (GO:0071683)	1/200	0.419254	0.419254	0.630236	0.630236	-0.630729	0.548279	NaPi-III	GO_CC_coexpression_predicted
mitochondrial respiratory chain complex II, succinate dehydrogenase complex (ubiquinone) (GO:0005749)	1/200	0.419254	0.419254	0.630236	0.630236	-0.609378	0.529719	CG3630	GO_CC_coexpression_predicted
plasma membrane proton-transporting V-type ATPase complex (GO:0033181)	1/200	0.419254	0.419254	0.630236	0.630236	-0.605708	0.526528	CG11151	GO_CC_coexpression_predicted
type Ib terminal bouton (GO:0061176)	1/200	0.419254	0.419254	0.630236	0.630236	-0.582284	0.506166	Sep4	GO_CC_coexpression_predicted
tricellular tight junction (GO:0061689)	1/200	0.419254	0.419254	0.630236	0.630236	-0.566318	0.492288	klar	GO_CC_coexpression_predicted
rhabdomere membrane (GO:0033583)	1/200	0.419254	0.419254	0.630236	0.630236	-0.556858	0.484064	NaPi-III	GO_CC_coexpression_predicted
unconventional myosin complex (GO:0016461)	1/200	0.419254	0.419254	0.630236	0.630236	-0.385615	0.335206	salr	GO_CC_coexpression_predicted
autolysosome_(GO:0044754)	1/198	0.416074	0.419254	0.682304	0.686023	-75.7523	66.4267	CG5174	GO_CC_autoRIF_predicted_zscore
peroxisomal_membrane_(GO:0005778)	1/119	0.275801	0.419254	0.496216	0.686023	-46.0191	59.2761	CG5174	GO_CC_autoRIF_predicted_zscore
clathrin_coat_of_endocytic_vesicle_(GO:0030128)	1/192	0.406429	0.419254	0.670891	0.686023	-42.0082	37.8219	CG5174	GO_CC_autoRIF_predicted_zscore
protein_kinase_complex_(GO:1902911)	1/163	0.357567	0.419254	0.609928	0.686023	-33.8939	34.8577	tgo	GO_CC_autoRIF_predicted_zscore
clathrin-coated_vesicle_(GO:0030136)	1/196	0.412876	0.419254	0.678543	0.686023	-39.3483	34.8078	CG5174	GO_CC_autoRIF_predicted_zscore
lysosome_(GO:0005764)	1/84	0.203541	0.419254	0.383585	0.686023	-18.0053	28.6623	CG5174	GO_CC_autoRIF_predicted_zscore
cytoplasmic_microtubule_(GO:0005881)	1/200	0.419254	0.419254	0.686023	0.686023	-32.2812	28.0613	CG2926	GO_CC_autoRIF_predicted_zscore
endoplasmic_reticulum_exit_site_(GO:0070971)	1/200	0.419254	0.419254	0.686023	0.686023	-32.0109	27.8263	NaPi-III	GO_CC_autoRIF_predicted_zscore
microbody_(GO:0042579)	1/171	0.371427	0.419254	0.627753	0.686023	-27.6974	27.4316	CCT8	GO_CC_autoRIF_predicted_zscore
cytosolic_proteasome_complex_(GO:0031597)	1/200	0.419254	0.419254	0.686023	0.686023	-27.8654	24.2228	CCT8	GO_CC_autoRIF_predicted_zscore
cytoplasmic_dynein_complex_(GO:0005868)	1/200	0.419254	0.419254	0.686023	0.686023	-27.1877	23.6337	CG2926	GO_CC_autoRIF_predicted_zscore
condensed_nuclear_chromosome_(GO:0000794)	1/200	0.419254	0.419254	0.686023	0.686023	-24.0515	20.9074	CG3918	GO_CC_autoRIF_predicted_zscore
vacuole_(GO:0005773)	1/191	0.404807	0.419254	0.668951	0.686023	-22.8462	20.6608	CG5174	GO_CC_autoRIF_predicted_zscore
COPII-coated_ER_to_Golgi_transport_vesicle_(GO:0030134)	1/200	0.419254	0.419254	0.686023	0.686023	-23.7064	20.6074	CG4822	GO_CC_autoRIF_predicted_zscore
cytoneme_(GO:0035230)	1/200	0.419254	0.419254	0.686023	0.686023	-23.5637	20.4834	rols	GO_CC_autoRIF_predicted_zscore
cytoplasmic_exosome_(RNase_complex)_(GO:0000177)	1/200	0.419254	0.419254	0.686023	0.686023	-23.527	20.4515	tgo	GO_CC_autoRIF_predicted_zscore
dynactin_complex_(GO:0005869)	1/200	0.419254	0.419254	0.686023	0.686023	-21.1197	18.3588	CG2926	GO_CC_autoRIF_predicted_zscore
cortical_cytoskeleton_(GO:0030863)	1/200	0.419254	0.419254	0.686023	0.686023	-19.8479	17.2534	CG2926	GO_CC_autoRIF_predicted_zscore
cortical_actin_cytoskeleton_(GO:0030864)	1/200	0.419254	0.419254	0.686023	0.686023	-19.1641	16.659	CG2926	GO_CC_autoRIF_predicted_zscore
CHRAC_(GO:0008623)	1/200	0.419254	0.419254	0.686023	0.686023	-17.5441	15.2507	CG3918	GO_CC_autoRIF_predicted_zscore
Cdc73/Paf1_complex_(GO:0016593)	1/200	0.419254	0.419254	0.686023	0.686023	-16.8931	14.6848	tgo	GO_CC_autoRIF_predicted_zscore
dendrite_(GO:0030425)	1/200	0.419254	0.419254	0.686023	0.686023	-16.8846	14.6774	tinc	GO_CC_autoRIF_predicted_zscore
acroblast_(GO:0036063)	1/200	0.419254	0.419254	0.686023	0.686023	-16.5212	14.3616	CG5174	GO_CC_autoRIF_predicted_zscore
dendrite_membrane_(GO:0032590)	1/200	0.419254	0.419254	0.686023	0.686023	-16.5095	14.3513	tinc	GO_CC_autoRIF_predicted_zscore
chromatin_(GO:0000785)	1/200	0.419254	0.419254	0.686023	0.686023	-16.179	14.064	tgo	GO_CC_autoRIF_predicted_zscore
actin_cytoskeleton_(GO:0015629)	1/200	0.419254	0.419254	0.686023	0.686023	-16.1507	14.0395	klar	GO_CC_autoRIF_predicted_zscore
COPI_vesicle_coat_(GO:0030126)	1/200	0.419254	0.419254	0.686023	0.686023	-16.1289	14.0205	CG5174	GO_CC_autoRIF_predicted_zscore
cell_projection_cytoplasm_(GO:0032838)	1/200	0.419254	0.419254	0.686023	0.686023	-15.7571	13.6973	tgo	GO_CC_autoRIF_predicted_zscore
DNA-directed_RNA_polymerase_II,_core_complex_(GO:0005665)	1/200	0.419254	0.419254	0.686023	0.686023	-15.174	13.1904	CG3918	GO_CC_autoRIF_predicted_zscore
actin_filament_(GO:0005884)	1/200	0.419254	0.419254	0.686023	0.686023	-14.8098	12.8738	klar	GO_CC_autoRIF_predicted_zscore
Golgi_stack_(GO:0005795)	1/200	0.419254	0.419254	0.686023	0.686023	-14.4623	12.5718	CG5174	GO_CC_autoRIF_predicted_zscore
RNA_polymerase_III_transcription_factor_complex_(GO:0090576)	1/200	0.419254	0.419254	0.686023	0.686023	-13.984	12.1559	CG3918	GO_CC_autoRIF_predicted_zscore
DNA-directed_RNA_polymerase_II,_holoenzyme_(GO:0016591)	1/200	0.419254	0.419254	0.686023	0.686023	-13.5478	11.7768	CG3918	GO_CC_autoRIF_predicted_zscore
chromosomal_region_(GO:0098687)	1/200	0.419254	0.419254	0.686023	0.686023	-10.7694	9.36157	tgo	GO_CC_autoRIF_predicted_zscore
P-body_(GO:0000932)	1/200	0.419254	0.419254	0.686023	0.686023	-8.86776	7.70854	CG2926	GO_CC_autoRIF_predicted_zscore
Golgi_membrane_(GO:0000139)	1/117	0.271851	0.419254	0.490353	0.686023	-5.34545	6.96246	CG5174	GO_CC_autoRIF_predicted_zscore
fusome_(GO:0045169)	1/200	0.419254	0.419254	0.686023	0.686023	-5.93022	5.15501	CG2926	GO_CC_autoRIF_predicted_zscore
NURF_complex_(GO:0016589)	1/200	0.419254	0.419254	0.686023	0.686023	-5.79636	5.03865	tgo	GO_CC_autoRIF_predicted_zscore
BLOC-1_complex_(GO:0031083)	1/186	0.396629	0.419254	0.659083	0.686023	-5.30865	4.90919	CG5174	GO_CC_autoRIF_predicted_zscore
anchored_component_of_plasma_membrane_(GO:0046658)	1/200	0.419254	0.419254	0.686023	0.686023	-4.57679	3.9785	tgo	GO_CC_autoRIF_predicted_zscore
axon_(GO:0030424)	1/200	0.419254	0.419254	0.686023	0.686023	-4.30879	3.74554	tinc	GO_CC_autoRIF_predicted_zscore
acetylcholine-gated_channel_complex_(GO:0005892)	1/200	0.419254	0.419254	0.686023	0.686023	-4.30292	3.74043	SK	GO_CC_autoRIF_predicted_zscore
gamma-tubulin_large_complex_(GO:0000931)	1/200	0.419254	0.419254	0.686023	0.686023	-4.30244	3.74001	CG1677	GO_CC_autoRIF_predicted_zscore
axonal_growth_cone_(GO:0044295)	1/200	0.419254	0.419254	0.686023	0.686023	-4.01649	3.49145	klar	GO_CC_autoRIF_predicted_zscore
zonula_adherens_(GO:0005915)	1/200	0.419254	0.419254	0.686023	0.686023	-3.40565	2.96045	tgo	GO_CC_autoRIF_predicted_zscore
cation_channel_complex_(GO:0034703)	1/200	0.419254	0.419254	0.686023	0.686023	-3.29132	2.86107	SK	GO_CC_autoRIF_predicted_zscore
large_ribosomal_subunit_(GO:0015934)	1/200	0.419254	0.419254	0.686023	0.686023	-0.670299	0.582676	CG3918	GO_CC_autoRIF_predicted_zscore
U5_snRNP_(GO:0005682)	1/200	0.419254	0.419254	0.686023	0.686023	0.367626	-0.319569	CG3918	GO_CC_autoRIF_predicted_zscore
rhabdomere_(GO:0016028)	1/200	0.419254	0.419254	0.686023	0.686023	0.441883	-0.384119	tinc	GO_CC_autoRIF_predicted_zscore
SAGA_complex_(GO:0000124)	1/200	0.419254	0.419254	0.686023	0.686023	0.776618	-0.675097	CG3918	GO_CC_autoRIF_predicted_zscore
SCF_ubiquitin_ligase_complex_(GO:0019005)	1/200	0.419254	0.419254	0.686023	0.686023	0.776618	-0.675097	CG3918	GO_CC_autoRIF_predicted_zscore
RSC_complex_(GO:0016586)	1/200	0.419254	0.419254	0.686023	0.686023	0.973045	-0.845846	CG3918	GO_CC_autoRIF_predicted_zscore
AMPA_glutamate_receptor_complex_(GO:0032281)	1/200	0.419254	0.419254	0.686023	0.686023	1.05854	-0.920162	tinc	GO_CC_autoRIF_predicted_zscore
ionotropic_glutamate_receptor_complex_(GO:0008328)	1/200	0.419254	0.419254	0.686023	0.686023	1.30605	-1.13532	SK	GO_CC_autoRIF_predicted_zscore
neurotransmitter_receptor_complex_(GO:0098878)	1/200	0.419254	0.419254	0.686023	0.686023	1.76932	-1.53803	Sep4	GO_CC_autoRIF_predicted_zscore
type_Is_terminal_bouton_(GO:0061177)	1/200	0.419254	0.419254	0.686023	0.686023	1.81281	-1.57584	tinc	GO_CC_autoRIF_predicted_zscore
type_I_terminal_bouton_(GO:0061174)	1/200	0.419254	0.419254	0.686023	0.686023	1.86093	-1.61766	tinc	GO_CC_autoRIF_predicted_zscore
pericentric_heterochromatin_(GO:0005721)	1/200	0.419254	0.419254	0.686023	0.686023	1.86935	-1.62499	CG3918	GO_CC_autoRIF_predicted_zscore
integral_component_of_endoplasmic_reticulum_membrane_(GO:0030176)	1/200	0.419254	0.419254	0.686023	0.686023	2.05671	-1.78786	Arf102F	GO_CC_autoRIF_predicted_zscore
mitochondrial_matrix_(GO:0005759)	1/200	0.419254	0.419254	0.686023	0.686023	2.18003	-1.89505	CCT8	GO_CC_autoRIF_predicted_zscore
U2_snRNP_(GO:0005686)	1/200	0.419254	0.419254	0.686023	0.686023	2.46492	-2.1427	CG3918	GO_CC_autoRIF_predicted_zscore
spliceosomal_snRNP_complex_(GO:0097525)	1/200	0.419254	0.419254	0.686023	0.686023	2.56294	-2.2279	CG3918	GO_CC_autoRIF_predicted_zscore
sex_chromosome_(GO:0000803)	1/200	0.419254	0.419254	0.686023	0.686023	3.0797	-2.67711	tgo	GO_CC_autoRIF_predicted_zscore
heterochromatin_(GO:0000792)	1/200	0.419254	0.419254	0.686023	0.686023	3.92684	-3.41352	CG3918	GO_CC_autoRIF_predicted_zscore
small_nuclear_ribonucleoprotein_complex_(GO:0030532)	1/200	0.419254	0.419254	0.686023	0.686023	7.16366	-6.22721	CG3918	GO_CC_autoRIF_predicted_zscore
mitochondrial_envelope_(GO:0005740)	1/200	0.419254	0.419254	0.686023	0.686023	9.0481	-7.86531	rols	GO_CC_autoRIF_predicted_zscore
septate_junction_(GO:0005918)	1/200	0.419254	0.419254	0.686023	0.686023	9.24085	-8.03287	rols	GO_CC_autoRIF_predicted_zscore
male_germ_cell_nucleus_(GO:0001673)	1/200	0.419254	0.419254	0.686023	0.686023	11.2097	-9.7443	CG3918	GO_CC_autoRIF_predicted_zscore
nucleolar_part_(GO:0044452)	1/200	0.419254	0.419254	0.686023	0.686023	11.8503	-10.3012	CCT8	GO_CC_autoRIF_predicted_zscore
microtubule_plus-end_(GO:0035371)	1/200	0.419254	0.419254	0.686023	0.686023	13.9236	-12.1035	CG2926	GO_CC_autoRIF_predicted_zscore
polymeric_cytoskeletal_fiber_(GO:0099513)	1/200	0.419254	0.419254	0.686023	0.686023	19.6414	-17.0738	klar	GO_CC_autoRIF_predicted_zscore
pleated_septate_junction_(GO:0005919)	1/200	0.419254	0.419254	0.686023	0.686023	20.3694	-17.7066	rols	GO_CC_autoRIF_predicted_zscore
nuclear_transcription_factor_complex_(GO:0044798)	1/200	0.419254	0.419254	0.686023	0.686023	20.3799	-17.7158	tgo	GO_CC_autoRIF_predicted_zscore
microtubule_cytoskeleton_(GO:0015630)	1/200	0.419254	0.419254	0.686023	0.686023	32.1845	-27.9773	CG2926	GO_CC_autoRIF_predicted_zscore
stress_fiber_(GO:0001725)	1/200	0.419254	0.419254	0.686023	0.686023	37.7429	-32.809	CG2926	GO_CC_autoRIF_predicted_zscore
nuclear_chromosome_(GO:0000228)	1/200	0.419254	0.419254	0.686023	0.686023	38.5965	-33.5511	CG3918	GO_CC_autoRIF_predicted_zscore
spliceosomal_complex_(GO:0005681)	1/200	0.419254	0.419254	0.686023	0.686023	39.5254	-34.3586	CG3918	GO_CC_autoRIF_predicted_zscore
nuclear_inner_membrane_(GO:0005637)	1/200	0.419254	0.419254	0.686023	0.686023	40.5996	-35.2923	CG3918	GO_CC_autoRIF_predicted_zscore
nuclear_chromosome_part_(GO:0044454)	1/200	0.419254	0.419254	0.686023	0.686023	43.5257	-37.8359	CG3918	GO_CC_autoRIF_predicted_zscore
nuclear_proteasome_complex_(GO:0031595)	1/200	0.419254	0.419254	0.686023	0.686023	46.7029	-40.5978	tgo	GO_CC_autoRIF_predicted_zscore
nuclear_origin_of_replication_recognition_complex_(GO:0005664)	1/200	0.419254	0.419254	0.686023	0.686023	48.9205	-42.5255	CG3918	GO_CC_autoRIF_predicted_zscore
nuclear_periphery_(GO:0034399)	1/200	0.419254	0.419254	0.686023	0.686023	48.9205	-42.5255	CG3918	GO_CC_autoRIF_predicted_zscore
nuclear_lumen_(GO:0031981)	1/200	0.419254	0.419254	0.686023	0.686023	49.9757	-43.4428	tgo	GO_CC_autoRIF_predicted_zscore
nuclear_body_(GO:0016604)	1/200	0.419254	0.419254	0.686023	0.686023	51.0309	-44.3601	tgo	GO_CC_autoRIF_predicted_zscore
nuclear_heterochromatin_(GO:0005720)	1/200	0.419254	0.419254	0.686023	0.686023	67.7617	-58.9037	CG3918	GO_CC_autoRIF_predicted_zscore
nuclear_chromatin_(GO:0000790)	1/200	0.419254	0.419254	0.686023	0.686023	73.207	-63.6372	CG3918	GO_CC_autoRIF_predicted_zscore
nuclear_euchromatin_(GO:0005719)	1/200	0.419254	0.419254	0.686023	0.686023	87.167	-75.7724	CG3918	GO_CC_autoRIF_predicted_zscore
cytosol_(GO:0005829)	1/188	0.399913	0.419254	0.695311	0.717927	-92.6238	84.8904	CCT8	GO_CC_geneRIF_predicted_zscore
dendrite_membrane_(GO:0032590)	1/200	0.419254	0.419254	0.717927	0.717927	-96.1663	83.5952	tinc	GO_CC_geneRIF_predicted_zscore
cytoplasmic_microtubule_(GO:0005881)	1/200	0.419254	0.419254	0.717927	0.717927	-91.2137	79.29	CG2926	GO_CC_geneRIF_predicted_zscore
cytoplasmic_exosome_(RNase_complex)_(GO:0000177)	1/200	0.419254	0.419254	0.717927	0.717927	-90.6928	78.8373	tgo	GO_CC_geneRIF_predicted_zscore
cytoplasmic_stress_granule_(GO:0010494)	1/200	0.419254	0.419254	0.717927	0.717927	-88.2497	76.7135	CG2926	GO_CC_geneRIF_predicted_zscore
fusome_(GO:0045169)	1/200	0.419254	0.419254	0.717927	0.717927	-61.361	53.3398	CG2926	GO_CC_geneRIF_predicted_zscore
heterochromatin_(GO:0000792)	1/200	0.419254	0.419254	0.717927	0.717927	-57.5874	50.0595	CG3918	GO_CC_geneRIF_predicted_zscore
chloride_channel_complex_(GO:0034707)	1/200	0.419254	0.419254	0.717927	0.717927	-43.6227	37.9203	SK	GO_CC_geneRIF_predicted_zscore
dendrite_(GO:0030425)	1/200	0.419254	0.419254	0.717927	0.717927	-43.266	37.6102	tinc	GO_CC_geneRIF_predicted_zscore
cell_cortex_part_(GO:0044448)	1/200	0.419254	0.419254	0.717927	0.717927	-25.5355	22.1975	tgo	GO_CC_geneRIF_predicted_zscore
cytosolic_part_(GO:0044445)	1/200	0.419254	0.419254	0.717927	0.717927	-23.3109	20.2636	CG15387	GO_CC_geneRIF_predicted_zscore
euchromatin_(GO:0000791)	1/200	0.419254	0.419254	0.717927	0.717927	-22.5744	19.6234	CG1677	GO_CC_geneRIF_predicted_zscore
axonal_growth_cone_(GO:0044295)	1/200	0.419254	0.419254	0.717927	0.717927	-14.0746	12.2347	klar	GO_CC_geneRIF_predicted_zscore
condensed_chromosome_(GO:0000793)	1/200	0.419254	0.419254	0.717927	0.717927	-13.0022	11.3025	CG3918	GO_CC_geneRIF_predicted_zscore
COPI-coated_vesicle_membrane_(GO:0030663)	1/200	0.419254	0.419254	0.717927	0.717927	-11.6639	10.1392	CG4822	GO_CC_geneRIF_predicted_zscore
condensed_nuclear_chromosome_(GO:0000794)	1/200	0.419254	0.419254	0.717927	0.717927	-11.0385	9.59554	CG3918	GO_CC_geneRIF_predicted_zscore
chromatin_(GO:0000785)	1/200	0.419254	0.419254	0.717927	0.717927	-11.0287	9.58699	CG3918	GO_CC_geneRIF_predicted_zscore
clathrin_adaptor_complex_(GO:0030131)	1/200	0.419254	0.419254	0.717927	0.717927	-10.6819	9.28553	CG2926	GO_CC_geneRIF_predicted_zscore
RNAi_effector_complex_(GO:0031332)	1/200	0.419254	0.419254	0.717927	0.717927	-10.2727	8.92987	CG2926	GO_CC_geneRIF_predicted_zscore
RNA_polymerase_II_transcription_factor_complex_(GO:0090575)	1/200	0.419254	0.419254	0.717927	0.717927	-10.2103	8.8756	CG2926	GO_CC_geneRIF_predicted_zscore
COPI_vesicle_coat_(GO:0030126)	1/200	0.419254	0.419254	0.717927	0.717927	-9.11208	7.92093	CG4822	GO_CC_geneRIF_predicted_zscore
COPII-coated_ER_to_Golgi_transport_vesicle_(GO:0030134)	1/200	0.419254	0.419254	0.717927	0.717927	-8.10217	7.04304	CG4822	GO_CC_geneRIF_predicted_zscore
SCF_ubiquitin_ligase_complex_(GO:0019005)	1/200	0.419254	0.419254	0.717927	0.717927	-7.52903	6.54482	tgo	GO_CC_geneRIF_predicted_zscore
DNA-directed_RNA_polymerase_I_complex_(GO:0005736)	1/200	0.419254	0.419254	0.717927	0.717927	-7.12258	6.1915	CG2926	GO_CC_geneRIF_predicted_zscore
SAGA_complex_(GO:0000124)	1/200	0.419254	0.419254	0.717927	0.717927	-6.99612	6.08157	CG3918	GO_CC_geneRIF_predicted_zscore
axon_(GO:0030424)	1/200	0.419254	0.419254	0.717927	0.717927	-5.75544	5.00307	tinc	GO_CC_geneRIF_predicted_zscore
NURF_complex_(GO:0016589)	1/200	0.419254	0.419254	0.717927	0.717927	-4.23721	3.68331	CG1677	GO_CC_geneRIF_predicted_zscore
cell_projection_cytoplasm_(GO:0032838)	1/200	0.419254	0.419254	0.717927	0.717927	-3.17719	2.76186	tinc	GO_CC_geneRIF_predicted_zscore
U2_snRNP_(GO:0005686)	1/200	0.419254	0.419254	0.717927	0.717927	-2.82087	2.45212	CG3918	GO_CC_geneRIF_predicted_zscore
DNA-directed_RNA_polymerase_complex_(GO:0000428)	1/200	0.419254	0.419254	0.717927	0.717927	-2.5259	2.19571	CG2926	GO_CC_geneRIF_predicted_zscore
rhabdomere_(GO:0016028)	1/200	0.419254	0.419254	0.717927	0.717927	0.740146	-0.643392	pigs	GO_CC_geneRIF_predicted_zscore
rhabdomere_microvillus_(GO:0035996)	1/200	0.419254	0.419254	0.717927	0.717927	0.778977	-0.677147	SK	GO_CC_geneRIF_predicted_zscore
sensory_dendrite_(GO:0071683)	1/200	0.419254	0.419254	0.717927	0.717927	0.901865	-0.783972	tinc	GO_CC_geneRIF_predicted_zscore
pole_plasm_(GO:0045495)	1/200	0.419254	0.419254	0.717927	0.717927	1.08959	-0.947154	l(3)05822	GO_CC_geneRIF_predicted_zscore
lipid_droplet_(GO:0005811)	1/200	0.419254	0.419254	0.717927	0.717927	1.11426	-0.968604	l(3)05822	GO_CC_geneRIF_predicted_zscore
rhabdomere_membrane_(GO:0033583)	1/200	0.419254	0.419254	0.717927	0.717927	1.96065	-1.70435	pigs	GO_CC_geneRIF_predicted_zscore
neurotransmitter_receptor_complex_(GO:0098878)	1/200	0.419254	0.419254	0.717927	0.717927	2.09441	-1.82062	SK	GO_CC_geneRIF_predicted_zscore
nucleus_(GO:0005634)	1/200	0.419254	0.419254	0.717927	0.717927	2.17573	-1.89132	CG1677	GO_CC_geneRIF_predicted_zscore
small_ribosomal_subunit_(GO:0015935)	1/200	0.419254	0.419254	0.717927	0.717927	2.88857	-2.51097	l(3)05822	GO_CC_geneRIF_predicted_zscore
serine/threonine_protein_kinase_complex_(GO:1902554)	1/200	0.419254	0.419254	0.717927	0.717927	3.4626	-3.00996	CG2926	GO_CC_geneRIF_predicted_zscore
pericentric_heterochromatin_(GO:0005721)	1/200	0.419254	0.419254	0.717927	0.717927	3.92303	-3.41021	CG3918	GO_CC_geneRIF_predicted_zscore
small_nuclear_ribonucleoprotein_complex_(GO:0030532)	1/200	0.419254	0.419254	0.717927	0.717927	7.27892	-6.32741	CG3918	GO_CC_geneRIF_predicted_zscore
mitochondrion_(GO:0005739)	1/200	0.419254	0.419254	0.717927	0.717927	8.86429	-7.70553	CG4945	GO_CC_geneRIF_predicted_zscore
septate_junction_(GO:0005918)	1/200	0.419254	0.419254	0.717927	0.717927	10.251	-8.91099	rols	GO_CC_geneRIF_predicted_zscore
nuclear_ubiquitin_ligase_complex_(GO:0000152)	1/200	0.419254	0.419254	0.717927	0.717927	13.0916	-11.3802	CG1677	GO_CC_geneRIF_predicted_zscore
polytene_chromosome_(GO:0005700)	1/200	0.419254	0.419254	0.717927	0.717927	13.189	-11.4649	CG3918	GO_CC_geneRIF_predicted_zscore
spliceosomal_snRNP_complex_(GO:0097525)	1/200	0.419254	0.419254	0.717927	0.717927	14.9879	-13.0286	CG3918	GO_CC_geneRIF_predicted_zscore
mitochondrial_outer_membrane_(GO:0005741)	1/200	0.419254	0.419254	0.717927	0.717927	15.154	-13.1731	Past1	GO_CC_geneRIF_predicted_zscore
microtubule_plus-end_(GO:0035371)	1/200	0.419254	0.419254	0.717927	0.717927	24.5776	-21.3648	CG2926	GO_CC_geneRIF_predicted_zscore
mitochondrial_matrix_(GO:0005759)	1/200	0.419254	0.419254	0.717927	0.717927	29.2553	-25.431	CG5174	GO_CC_geneRIF_predicted_zscore
microtubule_end_(GO:1990752)	1/200	0.419254	0.419254	0.717927	0.717927	29.9738	-26.0556	CG2926	GO_CC_geneRIF_predicted_zscore
microvillus_membrane_(GO:0031528)	1/200	0.419254	0.419254	0.717927	0.717927	29.9856	-26.0658	rols	GO_CC_geneRIF_predicted_zscore
mitochondrial_inner_membrane_(GO:0005743)	1/200	0.419254	0.419254	0.717927	0.717927	29.9856	-26.0658	Past1	GO_CC_geneRIF_predicted_zscore
microtubule_cytoskeleton_(GO:0015630)	1/200	0.419254	0.419254	0.717927	0.717927	30.4686	-26.4857	CG2926	GO_CC_geneRIF_predicted_zscore
microbody_(GO:0042579)	1/200	0.419254	0.419254	0.717927	0.717927	31.1605	-27.0871	CG4822	GO_CC_geneRIF_predicted_zscore
spliceosomal_complex_(GO:0005681)	1/200	0.419254	0.419254	0.717927	0.717927	33.0262	-28.709	CG3918	GO_CC_geneRIF_predicted_zscore
transcription_factor_TFIID_complex_(GO:0005669)	1/200	0.419254	0.419254	0.717927	0.717927	34.106	-29.6476	CG3918	GO_CC_geneRIF_predicted_zscore
synaptonemal_complex_(GO:0000795)	1/200	0.419254	0.419254	0.717927	0.717927	34.7657	-30.2211	CG11180	GO_CC_geneRIF_predicted_zscore
spindle_pole_body_(GO:0005816)	1/200	0.419254	0.419254	0.717927	0.717927	38.0188	-33.0489	CG2926	GO_CC_geneRIF_predicted_zscore
nuclear_matrix_(GO:0016363)	1/200	0.419254	0.419254	0.717927	0.717927	50.5083	-43.9057	CG2926	GO_CC_geneRIF_predicted_zscore
nuclear_lamina_(GO:0005652)	1/200	0.419254	0.419254	0.717927	0.717927	52.0484	-45.2445	CG3918	GO_CC_geneRIF_predicted_zscore
nuclear_chromosome_part_(GO:0044454)	1/200	0.419254	0.419254	0.717927	0.717927	54.1057	-47.0329	CG1677	GO_CC_geneRIF_predicted_zscore
nuclear_heterochromatin_(GO:0005720)	1/200	0.419254	0.419254	0.717927	0.717927	55.3423	-48.1079	CG3918	GO_CC_geneRIF_predicted_zscore
nuclear_body_(GO:0016604)	1/200	0.419254	0.419254	0.717927	0.717927	55.4772	-48.2251	CG2926	GO_CC_geneRIF_predicted_zscore

## Sheet: 24h_Slmap-IR_phenotypes
Term	Overlap	P-value	Adjusted P-value	Old P-value	Old Adjusted P-value	Z-score	Combined Score	Genes	enrichR_category
modifier_of_variegation	4/200	0.000606881	0.0230615	0.0227576	0.514497	-1.77394	13.1399	CG3918;CG8223;pnut;tgo	phenotype_autoRIF_predicted_zscore
female_fertile	3/200	0.00690917	0.0656371	0.0983092	0.514497	-1.83026	9.10535	CG3918;pnut;tgo	phenotype_autoRIF_predicted_zscore
flight_defective	3/200	0.00690917	0.0656371	0.0983092	0.514497	-1.62242	8.07139	Act87E;Prm;sls	phenotype_autoRIF_predicted_zscore
jumping_defective	3/200	0.00690917	0.0656371	0.0983092	0.514497	-1.37688	6.84983	Act87E;Prm;sls	phenotype_autoRIF_predicted_zscore
hyperactive	2/90	0.0133195	0.0956871	0.0909159	0.514497	-1.54728	6.68197	pnut;tgo	phenotype_autoRIF_predicted_zscore
increased_occurrence_of_cell_division	2/101	0.0165709	0.0956871	0.110145	0.514497	-1.49454	6.12777	CG8223;pnut	phenotype_autoRIF_predicted_zscore
chemical_sensitive	2/108	0.0187986	0.0956871	0.122925	0.514497	-1.41684	5.63046	pnut;tgo	phenotype_autoRIF_predicted_zscore
cell_growth_defective	2/156	0.0371064	0.0956871	0.218396	0.514497	-1.31589	4.33449	pnut;tgo	phenotype_autoRIF_predicted_zscore
grandchildless	2/169	0.04289	0.0956871	0.245673	0.514497	-1.18116	3.71961	CG3918;CG8223	phenotype_autoRIF_predicted_zscore
cell_size_defective	2/175	0.0456665	0.0956871	0.258354	0.514497	-1.14713	3.54048	pnut;tgo	phenotype_autoRIF_predicted_zscore
cell_polarity_defective	2/177	0.0466066	0.0956871	0.262589	0.514497	-1.05643	3.23902	pnut;tgo	phenotype_autoRIF_predicted_zscore
cell_adhesion_defective	2/200	0.0579159	0.0956871	0.311406	0.514497	-0.935564	2.6652	pnut;tgo	phenotype_autoRIF_predicted_zscore
cell_migration_defective	2/200	0.0579159	0.0956871	0.311406	0.514497	-0.920343	2.62184	pnut;tgo	phenotype_autoRIF_predicted_zscore
cell_shape_defective	2/200	0.0579159	0.0956871	0.311406	0.514497	-0.838984	2.39007	pnut;tgo	phenotype_autoRIF_predicted_zscore
auxotroph	2/200	0.0579159	0.0956871	0.311406	0.514497	-0.817112	2.32776	CG1598;CG4822	phenotype_autoRIF_predicted_zscore
axis_specification_defective	2/200	0.0579159	0.0956871	0.311406	0.514497	-0.802206	2.2853	pnut;tgo	phenotype_autoRIF_predicted_zscore
homeotic	2/200	0.0579159	0.0956871	0.311406	0.514497	-0.642648	1.83075	pnut;tgo	phenotype_autoRIF_predicted_zscore
electrophoretic_variant	2/200	0.0579159	0.0956871	0.311406	0.514497	-0.618299	1.76139	CG11151;CG17597	phenotype_autoRIF_predicted_zscore
decreased_fecundity	2/200	0.0579159	0.0956871	0.311406	0.514497	-0.582956	1.6607	pnut;tgo	phenotype_autoRIF_predicted_zscore
sterile	2/200	0.0579159	0.0956871	0.311406	0.514497	-0.472143	1.34502	pnut;tgo	phenotype_autoRIF_predicted_zscore
neurogenic_phenotype	2/200	0.0579159	0.0956871	0.311406	0.514497	-0.453095	1.29076	pnut;tgo	phenotype_autoRIF_predicted_zscore
planar_polarity_defective	2/200	0.0579159	0.0956871	0.311406	0.514497	-0.352588	1.00444	pnut;tgo	phenotype_autoRIF_predicted_zscore
visible	2/200	0.0579159	0.0956871	0.311406	0.514497	-0.215243	0.613177	CG10465;rogdi	phenotype_autoRIF_predicted_zscore
GO0005865:striated muscle thin filament	1/7	0.0135724	0.100564	0.0241576	0.165241	-5.26374	22.6326	sls	allele_LOF_phenotypes_fromFlybase
indirect flight muscle & striated muscle thick filament	1/5	0.00971302	0.100564	0.0181656	0.165241	-4.55634	21.1154	sls	allele_LOF_phenotypes_fromFlybase
neuroblast MNB	1/6	0.0116446	0.100564	0.0211655	0.165241	-4.18632	18.6413	tgo	allele_LOF_phenotypes_fromFlybase
VUM neuron	1/5	0.00971302	0.100564	0.0181656	0.165241	-3.98427	18.4642	tgo	allele_LOF_phenotypes_fromFlybase
oogenesis stage S10	1/9	0.0174172	0.100564	0.0301182	0.165241	-3.54445	14.3561	tgo	allele_LOF_phenotypes_fromFlybase
ring canal	1/5	0.00971302	0.100564	0.0181656	0.165241	-2.966	13.7453	Msp300	allele_LOF_phenotypes_fromFlybase
pretarsus	1/9	0.0174172	0.100564	0.0301182	0.165241	-3.18008	12.8803	tgo	allele_LOF_phenotypes_fromFlybase
nurse cell & nucleus	1/13	0.0250629	0.100564	0.0419459	0.165241	-3.41127	12.5752	Msp300	allele_LOF_phenotypes_fromFlybase
pupa	1/10	0.0193341	0.100564	0.0330868	0.165241	-3.04115	12	fon	allele_LOF_phenotypes_fromFlybase
tarsal segment 2	1/10	0.0193341	0.100564	0.0330868	0.165241	-2.88359	11.3783	tgo	allele_LOF_phenotypes_fromFlybase
visceral muscle fiber	1/9	0.0174172	0.100564	0.0301182	0.165241	-2.75162	11.1449	sls	allele_LOF_phenotypes_fromFlybase
GO0030017:sarcomere	1/11	0.0212473	0.100564	0.0360476	0.165241	-2.87815	11.0853	sls	allele_LOF_phenotypes_fromFlybase
tarsal segment 3	1/12	0.023157	0.100564	0.0390007	0.165241	-2.92445	11.0119	tgo	allele_LOF_phenotypes_fromFlybase
oogenesis stage S9	1/11	0.0212473	0.100564	0.0360476	0.165241	-2.74066	10.5557	tgo	allele_LOF_phenotypes_fromFlybase
terminal tracheal cell	1/17	0.0326507	0.100564	0.0536498	0.165241	-2.98733	10.2223	Vha26	allele_LOF_phenotypes_fromFlybase
tarsal segment 4	1/13	0.0250629	0.100564	0.0419459	0.165241	-2.73475	10.0813	tgo	allele_LOF_phenotypes_fromFlybase
third segment of antenna	1/12	0.023157	0.100564	0.0390007	0.165241	-2.66663	10.0411	tgo	allele_LOF_phenotypes_fromFlybase
GO0030016:myofibril	1/16	0.0307592	0.100564	0.0507354	0.165241	-2.62754	9.14795	sls	allele_LOF_phenotypes_fromFlybase
unguis	1/17	0.0326507	0.100564	0.0536498	0.165241	-2.65439	9.08302	tgo	allele_LOF_phenotypes_fromFlybase
somatic muscle	1/16	0.0307592	0.100564	0.0507354	0.165241	-2.54586	8.86358	fon	allele_LOF_phenotypes_fromFlybase
wandering third instar larval stage	1/17	0.0326507	0.100564	0.0536498	0.165241	-2.56059	8.76204	fon	allele_LOF_phenotypes_fromFlybase
GO0030018:Z disc	1/9	0.0174172	0.100564	0.0301182	0.165241	-2.08251	8.4348	sls	allele_LOF_phenotypes_fromFlybase
embryonic/larval tracheal system	2/60	0.00610659	0.100564	0.0137967	0.165241	-1.64426	8.38308	tgo;Vha26	allele_LOF_phenotypes_fromFlybase
embryonic/larval somatic muscle	2/77	0.00988688	0.100564	0.021925	0.165241	-1.23711	5.71117	Msp300;sls	allele_LOF_phenotypes_fromFlybase
embryonic/larval muscle system	1/14	0.0269653	0.100564	0.0448835	0.165241	-1.56203	5.64395	sls	allele_LOF_phenotypes_fromFlybase
body size defective	1/18	0.0345387	0.102288	0.0565565	0.167494	-1.57591	5.304	fon	allele_LOF_phenotypes_fromFlybase
maxillary palpus	1/19	0.036423	0.103873	0.0594556	0.169559	-2.32293	7.69482	tgo	allele_LOF_phenotypes_fromFlybase
cell adhesion defective	1/21	0.040181	0.106687	0.0652308	0.173199	-2.33659	7.51065	Vha26	allele_LOF_phenotypes_fromFlybase
mitosis & nuclear chromosome	1/21	0.040181	0.106687	0.0652308	0.173199	-1.64554	5.28935	sls	allele_LOF_phenotypes_fromFlybase
indirect flight muscle	1/26	0.0495135	0.120531	0.0795362	0.198214	-2.23446	6.71569	sls	allele_LOF_phenotypes_fromFlybase
arista	1/27	0.0513693	0.120531	0.0823746	0.198214	-1.98738	5.89995	tgo	allele_LOF_phenotypes_fromFlybase
germ-line clone	1/28	0.0532216	0.120531	0.0852056	0.198813	-1.89311	5.55304	Msp300	allele_LOF_phenotypes_fromFlybase
midline glial cell	1/27	0.0513693	0.120531	0.0823746	0.198214	-1.68878	5.01351	tgo	allele_LOF_phenotypes_fromFlybase
locomotor behavior defective	2/190	0.0528888	0.120531	0.11039	0.212502	-0.967032	2.84265	fon;sls	allele_LOF_phenotypes_fromFlybase
distal	1/29	0.0550705	0.121155	0.088029	0.19936	-2.19819	6.37286	tgo	allele_LOF_phenotypes_fromFlybase
tarsal segment	1/32	0.0605958	0.129608	0.0964545	0.2122	-1.70719	4.78615	tgo	allele_LOF_phenotypes_fromFlybase
GO0000278:mitotic cell cycle	1/33	0.0624306	0.129923	0.0992482	0.212281	-1.64966	4.57566	sls	allele_LOF_phenotypes_fromFlybase
presumptive embryonic/larval tracheal system	1/35	0.0660896	0.133918	0.104813	0.212502	-2.50795	6.81345	tgo	allele_LOF_phenotypes_fromFlybase
cell migration defective	1/36	0.067914	0.134087	0.107585	0.212502	-1.73475	4.66562	tgo	allele_LOF_phenotypes_fromFlybase
paralytic	1/37	0.0697348	0.13424	0.110349	0.212502	-1.66966	4.4464	sls	allele_LOF_phenotypes_fromFlybase
cell shape defective	1/41	0.0769836	0.144443	0.121332	0.227443	-1.78902	4.58735	Vha26	allele_LOF_phenotypes_fromFlybase
flightless	1/42	0.0787872	0.144443	0.12406	0.227443	-1.65046	4.19383	sls	allele_LOF_phenotypes_fromFlybase
border follicle cell	1/46	0.0859672	0.153941	0.134898	0.241561	-1.6155	3.9641	tgo	allele_LOF_phenotypes_fromFlybase
embryonic/larval dorsal trunk	1/53	0.0984013	0.160166	0.153587	0.254843	-1.58612	3.67775	Vha26	allele_LOF_phenotypes_fromFlybase
P-stage	1/55	0.101924	0.160166	0.158863	0.254843	-1.56456	3.57272	fon	allele_LOF_phenotypes_fromFlybase
antenna	1/52	0.0966351	0.160166	0.150939	0.254843	-1.5122	3.53373	tgo	allele_LOF_phenotypes_fromFlybase
GO0030424:axon	1/55	0.101924	0.160166	0.158863	0.254843	-1.51937	3.46953	tgo	allele_LOF_phenotypes_fromFlybase
GO0005634:nucleus	1/54	0.100164	0.160166	0.156229	0.254843	-1.37162	3.15601	sls	allele_LOF_phenotypes_fromFlybase
somatic clone	3/577	0.101852	0.160166	0.248585	0.375315	-1.03003	2.35283	Msp300;tgo;Vha26	allele_LOF_phenotypes_fromFlybase
cell_death_defective	1/82	0.148181	0.23462	0.374971	0.593704	-0.554291	1.05832	pnut	phenotype_autoRIF_predicted_zscore
lethal - all die before end of P-stage	1/87	0.156489	0.240993	0.239526	0.375315	-1.25076	2.31988	fon	allele_LOF_phenotypes_fromFlybase
dorsal appendage	1/89	0.15979	0.241251	0.244339	0.375315	-0.957931	1.75675	Msp300	allele_LOF_phenotypes_fromFlybase
leg	1/100	0.177721	0.258941	0.270347	0.400321	-1.0646	1.83914	tgo	allele_LOF_phenotypes_fromFlybase
lethal - all die before end of embryonic stage	2/393	0.178232	0.258941	0.345121	0.474541	-0.753044	1.29875	Msp300;sls	allele_LOF_phenotypes_fromFlybase
some die during embryonic stage	2/418	0.195848	0.279264	0.375699	0.507523	-0.773251	1.26072	Msp300;sls	allele_LOF_phenotypes_fromFlybase
male fertile	1/117	0.204702	0.281465	0.309032	0.440656	-1.12718	1.78794	CG4021	allele_LOF_phenotypes_fromFlybase
egg	1/116	0.203139	0.281465	0.306806	0.440656	-1.00141	1.59611	Msp300	allele_LOF_phenotypes_fromFlybase
macrochaeta	1/127	0.220168	0.29742	0.330955	0.463337	-0.943782	1.42829	tgo	allele_LOF_phenotypes_fromFlybase
visible	2/469	0.232414	0.308549	0.437275	0.55197	-0.74829	1.09193	sls;tgo	allele_LOF_phenotypes_fromFlybase
radiation_resistant	1/120	0.209373	0.318247	0.49833	0.687385	-0.217464	0.340034	pnut	phenotype_autoRIF_predicted_zscore
cell_number_defective	1/129	0.223226	0.324524	0.523996	0.687385	-0.208472	0.312618	pnut	phenotype_autoRIF_predicted_zscore
chemical_resistant	1/177	0.293207	0.324524	0.641335	0.687385	-0.221093	0.271253	scramb1	phenotype_autoRIF_predicted_zscore
exocytosis_defective	1/200	0.324524	0.324524	0.687385	0.687385	-0.058123	0.0654114	dpr7	phenotype_autoRIF_predicted_zscore
increased_fecundity	1/181	0.298753	0.324524	0.649776	0.687385	0.0818071	-0.0988342	pnut	phenotype_autoRIF_predicted_zscore
sensory_perception_defective	1/200	0.324524	0.324524	0.687385	0.687385	0.23079	-0.25973	SK	phenotype_autoRIF_predicted_zscore
male_fertile	1/200	0.324524	0.324524	0.687385	0.687385	0.236519	-0.266177	pnut	phenotype_autoRIF_predicted_zscore
cell_lethal	1/198	0.321855	0.324524	0.683613	0.687385	0.240722	-0.272895	pnut	phenotype_autoRIF_predicted_zscore
fertile	1/200	0.324524	0.324524	0.687385	0.687385	0.349213	-0.393002	pnut	phenotype_autoRIF_predicted_zscore
stress_response_defective	1/195	0.317833	0.324524	0.677873	0.687385	0.343399	-0.393613	pnut	phenotype_autoRIF_predicted_zscore
paralytic	1/200	0.324524	0.324524	0.687385	0.687385	0.369746	-0.41611	SK	phenotype_autoRIF_predicted_zscore
semi-sterile	1/200	0.324524	0.324524	0.687385	0.687385	0.581059	-0.653921	CG3918	phenotype_autoRIF_predicted_zscore
viable	1/200	0.324524	0.324524	0.687385	0.687385	0.658248	-0.74079	pnut	phenotype_autoRIF_predicted_zscore
size_defective	1/200	0.324524	0.324524	0.687385	0.687385	0.681046	-0.766446	pnut	phenotype_autoRIF_predicted_zscore
recessive	4/1313	0.251911	0.328765	0.657255	0.6839	-0.840119	1.15826	Msp300;fon;sls;tgo	allele_LOF_phenotypes_fromFlybase
lethal - all die before end of pupal stage	1/161	0.270592	0.341566	0.401097	0.523466	-0.886346	1.15858	fon	allele_LOF_phenotypes_fromFlybase
mitotic cell cycle defective	1/161	0.270592	0.341566	0.401097	0.523466	-0.814736	1.06498	sls	allele_LOF_phenotypes_fromFlybase
some die during pupal stage	1/169	0.281986	0.350209	0.416652	0.534704	-0.894082	1.13182	fon	allele_LOF_phenotypes_fromFlybase
dominant	1/212	0.340322	0.41595	0.494466	0.614095	-0.94073	1.01398	sls	allele_LOF_phenotypes_fromFlybase
partially lethal - majority die	1/222	0.353212	0.424958	0.511228	0.624834	-0.898546	0.935105	Msp300	allele_LOF_phenotypes_fromFlybase
ectopic	1/244	0.380712	0.437534	0.546435	0.637508	-0.947199	0.914722	tgo	allele_LOF_phenotypes_fromFlybase
maternal effect	1/239	0.374564	0.437534	0.53863	0.637508	-0.857431	0.841992	Msp300	allele_LOF_phenotypes_fromFlybase
some die during larval stage	1/241	0.37703	0.437534	0.541766	0.637508	-0.807079	0.78725	Msp300	allele_LOF_phenotypes_fromFlybase
germline clone	1/259	0.398805	0.444061	0.569173	0.639325	-0.918511	0.844372	Msp300	allele_LOF_phenotypes_fromFlybase
lethal - all die before end of larval stage	1/258	0.397615	0.444061	0.567689	0.639325	-0.789712	0.728329	Msp300	allele_LOF_phenotypes_fromFlybase
female sterile	1/265	0.405897	0.444061	0.577991	0.639325	-0.804515	0.725396	Msp300	allele_LOF_phenotypes_fromFlybase
wing	1/271	0.412907	0.444061	0.586654	0.639325	-0.756964	0.669559	tgo	allele_LOF_phenotypes_fromFlybase
eye	1/273	0.415226	0.444061	0.589507	0.639325	-0.685205	0.602249	Vha26	allele_LOF_phenotypes_fromFlybase
third instar larval stage	1/295	0.440152	0.46427	0.619798	0.66284	-0.868432	0.712666	Vha26	allele_LOF_phenotypes_fromFlybase
larval stage	1/319	0.466163	0.483969	0.650638	0.6839	-0.873308	0.666526	sls	allele_LOF_phenotypes_fromFlybase
lethal	2/818	0.477684	0.483969	0.778329	0.778329	-0.641076	0.473632	sls;tgo	allele_LOF_phenotypes_fromFlybase
viable	2/817	0.477036	0.483969	0.77761	0.778329	-0.632939	0.468477	Msp300;scramb1	allele_LOF_phenotypes_fromFlybase
embryonic stage	1/364	0.511798	0.511798	0.702716	0.721455	-0.874826	0.58598	sls	allele_LOF_phenotypes_fromFlybase

## Sheet: 24h_Slmap-IR_GO_biolProcess
Term	Overlap	P-value	Adjusted P-value	Old P-value	Old Adjusted P-value	Z-score	Combined Score	Genes	enrichR_category
histone exchange (GO:0043486)	3/22	1.02897e-05	0.00130679	3.58783e-05	0.00455655	-2.28257	26.2138	MrgBP;Act87E;CG8223	GO_BP_2018
skeletal muscle organ development (GO:0060538)	2/11	0.000201535	0.0111001	0.000515929	0.0255	-2.7888	23.7314	Msp300;sls	GO_BP_2018
striated muscle tissue development (GO:0014706)	2/16	0.000437011	0.0111001	0.00100394	0.0255	-2.77471	21.4639	Msp300;sls	GO_BP_2018
skeletal muscle tissue development (GO:0007519)	2/13	0.00028511	0.0111001	0.000692296	0.0255	-2.52872	20.641	Msp300;sls	GO_BP_2018
visceral muscle development (GO:0007522)	2/16	0.000437011	0.0111001	0.00100394	0.0255	-2.47306	19.1305	Msp300;sls	GO_BP_2018
mesoderm development (GO:0007498)	3/83	0.000565462	0.0119689	0.00143831	0.0304443	-1.21086	9.05466	Msp300;Prm;sls	GO_BP_2018
ATP-dependent chromatin remodeling (GO:0043044)	2/28	0.00135639	0.0246089	0.00279999	0.0507999	-1.99042	13.1426	MrgBP;Act87E	GO_BP_2018
myofibril assembly (GO:0030239)	2/44	0.00332846	0.0528392	0.00649376	0.103089	-1.70818	9.74561	Prm;sls	GO_BP_2018
actomyosin structure organization (GO:0031032)	2/52	0.00461987	0.0595149	0.00886436	0.113598	-2.17981	11.7217	Prm;sls	GO_BP_2018
internal peptidyl-lysine acetylation (GO:0018393)	2/55	0.00515484	0.0595149	0.00983923	0.113598	-1.79111	9.43525	MrgBP;Act87E	GO_BP_2018
cytoskeleton organization (GO:0007010)	2/53	0.00479516	0.0595149	0.00918419	0.113598	-1.66984	8.91722	Msp300;Act87E	GO_BP_2018
regulation of eclosion (GO:0007563)	3/75	0.000420067	0.0651714	0.00118161	0.179334	-1.82748	14.2088	RnpS1;pnut;tgo	GO_BP_coexpression_predicted
female germ-line stem cell population maintenance (GO:0036099)	4/200	0.000606881	0.0651714	0.00203531	0.179334	-1.88596	13.9697	RnpS1;CG8223;pnut;tgo	GO_BP_coexpression_predicted
mRNA cleavage involved in mRNA processing (GO:0098787)	3/91	0.00073965	0.0651714	0.00202444	0.179334	-1.88851	13.6149	RnpS1;CG8223;pnut	GO_BP_coexpression_predicted
negative regulation of protein kinase B signaling (GO:0051898)	3/78	0.000471354	0.0651714	0.00131825	0.179334	-1.75468	13.4407	CG8223;pnut;tgo	GO_BP_coexpression_predicted
sarcomere organization (GO:0045214)	4/200	0.000606881	0.0651714	0.00203531	0.179334	-1.70561	12.6338	Msp300;Act87E;Prm;sls	GO_BP_coexpression_predicted
positive regulation of transcription of Notch receptor target (GO:0007221)	4/178	0.000391178	0.0651714	0.00133587	0.179334	-1.6037	12.5832	RnpS1;CG8223;pnut;tgo	GO_BP_coexpression_predicted
pre-mRNA cleavage required for polyadenylation (GO:0098789)	3/91	0.00073965	0.0651714	0.00202444	0.179334	-1.63993	11.8228	RnpS1;CG8223;pnut	GO_BP_coexpression_predicted
myofibril assembly (GO:0030239)	4/200	0.000606881	0.0651714	0.00203531	0.179334	-1.56566	11.5971	Msp300;Act87E;Prm;sls	GO_BP_coexpression_predicted
mRNA splice site selection (GO:0006376)	3/87	0.000648822	0.0651714	0.00178675	0.179334	-1.56983	11.5231	RnpS1;pnut;tgo	GO_BP_coexpression_predicted
RNA splicing (GO:0008380)	3/107	0.00118274	0.0781595	0.00316944	0.209447	-1.73222	11.675	RnpS1;CG8223;pnut	GO_BP_coexpression_predicted
dorsal/ventral pattern formation (GO:0009953)	3/102	0.00103003	0.0781595	0.00277716	0.209447	-1.60372	11.0306	CG8223;pnut;tgo	GO_BP_coexpression_predicted
negative regulation of phosphatidylinositol 3-kinase signaling (GO:0014067)	3/106	0.00115113	0.0781595	0.0030884	0.209447	-1.53243	10.37	CG8223;pnut;tgo	GO_BP_coexpression_predicted
histone acetylation (GO:0016573)	2/69	0.00800507	0.0847203	0.0149817	0.133526	-1.40345	6.77539	MrgBP;Act87E	GO_BP_2018
regulation of transcription from RNA polymerase III promoter (GO:0006359)	1/6	0.0116446	0.0855684	0.0184691	0.133526	-4.94282	22.01	Maf1	GO_BP_2018
negative regulation of transposition, DNA-mediated (GO:0000335)	1/7	0.0135724	0.0855684	0.0210809	0.133526	-5.00354	21.5138	RnpS1	GO_BP_2018
regulation of transposition, DNA-mediated (GO:0000337)	1/7	0.0135724	0.0855684	0.0210809	0.133526	-4.81765	20.7145	RnpS1	GO_BP_2018
microtubule anchoring (GO:0034453)	1/6	0.0116446	0.0855684	0.0184691	0.133526	-4.16593	18.5505	Msp300	GO_BP_2018
septin ring organization (GO:0031106)	1/8	0.0154966	0.0855684	0.0236861	0.133526	-4.18039	17.4203	pnut	GO_BP_2018
trehalose metabolic process (GO:0005991)	1/7	0.0135724	0.0855684	0.0210809	0.133526	-3.50815	15.084	CG5171	GO_BP_2018
septin ring assembly (GO:0000921)	1/6	0.0116446	0.0855684	0.0184691	0.133526	-3.15924	14.0678	pnut	GO_BP_2018
DNA replication-independent nucleosome assembly (GO:0006336)	1/8	0.0154966	0.0855684	0.0236861	0.133526	-2.90238	12.0946	CG8223	GO_BP_2018
posttranslational protein targeting to endoplasmic reticulum membrane (GO:0006620)	1/8	0.0154966	0.0855684	0.0236861	0.133526	-2.60937	10.8736	CG1598	GO_BP_2018
tyrosine metabolic process (GO:0006570)	1/8	0.0154966	0.0855684	0.0236861	0.133526	-1.98036	8.2524	yellow-f	GO_BP_2018
nucleosome organization (GO:0034728)	2/90	0.0133195	0.0855684	0.0244074	0.133526	-1.32321	5.71431	MrgBP;Act87E	GO_BP_2018
regulation of membrane potential in photoreceptor cell (GO:0016057)	1/9	0.0174172	0.0870881	0.0262846	0.133526	-4.24376	17.1885	SK	GO_BP_2018
centromere complex assembly (GO:0034508)	1/9	0.0174172	0.0870881	0.0262846	0.133526	-2.74964	11.1369	CG8223	GO_BP_2018
histone modification (GO:0016570)	2/105	0.0178291	0.0870881	0.0322879	0.146449	-1.15578	4.65426	MrgBP;Act87E	GO_BP_2018
larval visceral muscle development (GO:0007523)	1/10	0.0193341	0.0909418	0.0288766	0.141051	-3.10313	12.2446	Msp300	GO_BP_2018
protein targeting to ER (GO:0045047)	1/11	0.0212473	0.0963719	0.031462	0.146449	-3.38272	13.0286	CG1598	GO_BP_2018
mitochondrion localization (GO:0051646)	1/13	0.0250629	0.109758	0.0366131	0.159852	-2.82235	10.4042	Msp300	GO_BP_2018
cholesterol transport (GO:0030301)	1/14	0.0269653	0.114153	0.0391789	0.159852	-3.48449	12.5902	CG4822	GO_BP_2018
negative regulation of DNA recombination (GO:0045910)	1/15	0.0288641	0.114803	0.0417382	0.159852	-3.43386	12.1736	RnpS1	GO_BP_2018
regulation of R7 cell differentiation (GO:0045676)	1/16	0.0307592	0.114803	0.0442909	0.159852	-2.75203	9.58139	tgo	GO_BP_2018
liquid clearance, open tracheal system (GO:0035002)	1/21	0.040181	0.114803	0.0569579	0.159852	-2.7962	8.98799	Vha26	GO_BP_2018
apical protein localization (GO:0045176)	1/18	0.0345387	0.114803	0.0493771	0.159852	-2.64158	8.8907	Vha26	GO_BP_2018
nuclear migration (GO:0007097)	1/18	0.0345387	0.114803	0.0493771	0.159852	-2.488	8.3738	Msp300	GO_BP_2018
melanin biosynthetic process (GO:0042438)	1/16	0.0307592	0.114803	0.0442909	0.159852	-2.39511	8.33872	yellow-f	GO_BP_2018
response to insulin (GO:0032868)	1/24	0.0457911	0.114803	0.0644812	0.159852	-2.66819	8.2278	tgo	GO_BP_2018
assembly of actomyosin apparatus involved in cytokinesis (GO:0000912)	1/22	0.0420546	0.114803	0.0594721	0.159852	-2.59651	8.22778	pnut	GO_BP_2018
epithelial fluid transport (GO:0042045)	1/26	0.0495135	0.114803	0.069465	0.159852	-2.69865	8.11081	Vha26	GO_BP_2018
sterol transport (GO:0015918)	1/20	0.0383038	0.114803	0.0544374	0.159852	-2.47974	8.08942	CG4822	GO_BP_2018
actomyosin contractile ring organization (GO:0044837)	1/21	0.040181	0.114803	0.0569579	0.159852	-2.49083	8.00644	pnut	GO_BP_2018
nucleus localization (GO:0051647)	1/18	0.0345387	0.114803	0.0493771	0.159852	-2.33462	7.85756	Msp300	GO_BP_2018
cellular response to peptide hormone stimulus (GO:0071375)	1/24	0.0457911	0.114803	0.0644812	0.159852	-2.50611	7.72799	tgo	GO_BP_2018
phenol-containing compound biosynthetic process (GO:0046189)	1/19	0.036423	0.114803	0.0519104	0.159852	-2.32209	7.69204	yellow-f	GO_BP_2018
mitotic chromosome condensation (GO:0007076)	1/25	0.0476541	0.114803	0.0669763	0.159852	-2.51292	7.64879	sls	GO_BP_2018
negative regulation of transposition (GO:0010529)	1/21	0.040181	0.114803	0.0569579	0.159852	-2.3649	7.60165	RnpS1	GO_BP_2018
protein targeting to membrane (GO:0006612)	1/29	0.0550705	0.114803	0.0768932	0.159852	-2.60973	7.56598	CG1598	GO_BP_2018
potassium ion transport (GO:0006813)	1/19	0.036423	0.114803	0.0519104	0.159852	-2.26913	7.51663	SK	GO_BP_2018
aromatic compound biosynthetic process (GO:0019438)	1/27	0.0513693	0.114803	0.0719473	0.159852	-2.45621	7.29178	yellow-f	GO_BP_2018
striated muscle cell development (GO:0055002)	1/27	0.0513693	0.114803	0.0719473	0.159852	-2.45165	7.27825	Prm	GO_BP_2018
heterocycle biosynthetic process (GO:0018130)	1/29	0.0550705	0.114803	0.0768932	0.159852	-2.48973	7.21809	yellow-f	GO_BP_2018
RNA splicing (GO:0008380)	1/27	0.0513693	0.114803	0.0719473	0.159852	-2.40883	7.15112	RnpS1	GO_BP_2018
terminal branching, open tracheal system (GO:0007430)	1/25	0.0476541	0.114803	0.0669763	0.159852	-2.32667	7.08189	Vha26	GO_BP_2018
regulation of photoreceptor cell differentiation (GO:0046532)	1/25	0.0476541	0.114803	0.0669763	0.159852	-2.31382	7.04279	tgo	GO_BP_2018
actomyosin contractile ring assembly (GO:0000915)	1/23	0.0439246	0.114803	0.0619798	0.159852	-2.17319	6.79182	pnut	GO_BP_2018
plasma membrane organization (GO:0007009)	1/25	0.0476541	0.114803	0.0669763	0.159852	-2.19554	6.68276	scramb1	GO_BP_2018
organic cyclic compound biosynthetic process (GO:1901362)	1/31	0.0587575	0.114803	0.0818139	0.159852	-2.33463	6.61714	yellow-f	GO_BP_2018
anion transport (GO:0006820)	1/28	0.0532216	0.114803	0.0744234	0.159852	-2.25153	6.60439	MFS12	GO_BP_2018
ATP hydrolysis coupled proton transport (GO:0015991)	1/31	0.0587575	0.114803	0.0818139	0.159852	-2.30816	6.5421	Vha26	GO_BP_2018
nucleus organization (GO:0006997)	1/29	0.0550705	0.114803	0.0768932	0.159852	-2.21695	6.42726	Msp300	GO_BP_2018
insulin receptor signaling pathway (GO:0008286)	1/29	0.0550705	0.114803	0.0768932	0.159852	-2.04209	5.9203	tgo	GO_BP_2018
ATP hydrolysis coupled cation transmembrane transport (GO:0099132)	1/31	0.0587575	0.114803	0.0818139	0.159852	-2.01709	5.71712	Vha26	GO_BP_2018
glial cell migration (GO:0008347)	1/30	0.0569157	0.114803	0.0793567	0.159852	-1.92314	5.51208	tgo	GO_BP_2018
cellular response to hypoxia (GO:0071456)	1/30	0.0569157	0.114803	0.0793567	0.159852	-1.89574	5.43354	tgo	GO_BP_2018
organelle assembly (GO:0070925)	2/161	0.0392925	0.114803	0.068803	0.159852	-1.33026	4.30569	pnut;Prm	GO_BP_2018
regulation of protein ubiquitination involved in ubiquitin-dependent protein catabolic process (GO:2000058)	2/41	0.00289578	0.114818	0.00604786	0.262267	-2.09007	12.2154	pnut;tgo	GO_BP_coexpression_predicted
positive regulation of transcription from RNA polymerase II promoter (GO:0045944)	2/40	0.00275791	0.114818	0.00577604	0.262267	-2.05791	12.1279	pnut;tgo	GO_BP_coexpression_predicted
maintenance of gastrointestinal epithelium (GO:0030277)	3/133	0.00220569	0.114818	0.00575378	0.262267	-1.94078	11.8712	pnut;CG7142;tgo	GO_BP_coexpression_predicted
deadenylation-dependent decapping of nuclear-transcribed mRNA (GO:0000290)	2/40	0.00275791	0.114818	0.00577604	0.262267	-2.0077	11.832	pnut;tgo	GO_BP_coexpression_predicted
regulation of immune effector process (GO:0002697)	3/140	0.00255148	0.114818	0.00661454	0.262267	-1.92593	11.4999	CG8223;pnut;tgo	GO_BP_coexpression_predicted
production of miRNAs involved in gene silencing by miRNA (GO:0035196)	3/138	0.00244948	0.114818	0.00636119	0.262267	-1.79887	10.8146	RnpS1;CG8223;pnut	GO_BP_coexpression_predicted
intestinal epithelial structure maintenance (GO:0060729)	3/133	0.00220569	0.114818	0.00575378	0.262267	-1.72577	10.556	pnut;CG7142;tgo	GO_BP_coexpression_predicted
regulation of defense response to virus (GO:0050688)	3/140	0.00255148	0.114818	0.00661454	0.262267	-1.64206	9.80487	CG8223;pnut;tgo	GO_BP_coexpression_predicted
cellular response to decreased oxygen levels (GO:0036294)	1/32	0.0605958	0.116601	0.0842649	0.162146	-1.82851	5.12629	tgo	GO_BP_2018
energy coupled proton transmembrane transport, against electrochemical gradient (GO:0015988)	1/33	0.0624306	0.118339	0.0867096	0.16436	-1.97623	5.48147	Vha26	GO_BP_2018
negative regulation of response to stimulus (GO:0048585)	2/63	0.00671323	0.119317	0.0134371	0.271919	-2.31495	11.5833	pnut;tgo	GO_BP_coexpression_predicted
regulation of transcription initiation from RNA polymerase II promoter (GO:0060260)	2/51	0.00444764	0.119317	0.00907892	0.271919	-1.95109	10.5659	RnpS1;pnut	GO_BP_coexpression_predicted
negative regulation of mitotic cell cycle phase transition (GO:1901991)	3/154	0.00333943	0.119317	0.00855806	0.271919	-1.8146	10.3468	CG8223;pnut;tgo	GO_BP_coexpression_predicted
small nucleolar ribonucleoprotein complex assembly (GO:0000491)	3/200	0.00690917	0.119317	0.017145	0.271919	-2.06584	10.2774	RnpS1;CG8223;pnut	GO_BP_coexpression_predicted
negative regulation of transcription, DNA-templated (GO:0045892)	2/47	0.00378946	0.119317	0.00779907	0.271919	-1.84154	10.2675	pnut;tgo	GO_BP_coexpression_predicted
negative regulation of transcription from RNA polymerase II promoter (GO:0000122)	2/49	0.00411238	0.119317	0.00842792	0.271919	-1.74781	9.60204	pnut;tgo	GO_BP_coexpression_predicted
mRNA-containing ribonucleoprotein complex export from nucleus (GO:0071427)	3/172	0.00455113	0.119317	0.0115075	0.271919	-1.75633	9.47079	RnpS1;CG8223;pnut	GO_BP_coexpression_predicted
negative regulation of gene expression (GO:0010629)	2/64	0.0069213	0.119317	0.0138343	0.271919	-1.86669	9.28332	pnut;tgo	GO_BP_coexpression_predicted
negative regulation of nucleic acid-templated transcription (GO:1903507)	2/64	0.0069213	0.119317	0.0138343	0.271919	-1.86508	9.27534	pnut;tgo	GO_BP_coexpression_predicted
negative regulation of Wnt signaling pathway (GO:0030178)	2/64	0.0069213	0.119317	0.0138343	0.271919	-1.86317	9.26581	pnut;tgo	GO_BP_coexpression_predicted
germ-band extension (GO:0007377)	3/174	0.00470009	0.119317	0.0118673	0.271919	-1.69337	9.07675	CG8223;pnut;tgo	GO_BP_coexpression_predicted
skeletal myofibril assembly (GO:0014866)	3/200	0.00690917	0.119317	0.017145	0.271919	-1.81534	9.03114	Act87E;Prm;sls	GO_BP_coexpression_predicted
blood circulation (GO:0008015)	3/200	0.00690917	0.119317	0.017145	0.271919	-1.78964	8.9033	Act87E;Prm;sls	GO_BP_coexpression_predicted
muscle thin filament assembly (GO:0071689)	3/200	0.00690917	0.119317	0.017145	0.271919	-1.76295	8.77051	Act87E;Prm;sls	GO_BP_coexpression_predicted
striated muscle cell development (GO:0055002)	3/200	0.00690917	0.119317	0.017145	0.271919	-1.74817	8.69701	Act87E;Prm;sls	GO_BP_coexpression_predicted
muscle contraction (GO:0006936)	3/172	0.00455113	0.119317	0.0115075	0.271919	-1.53615	8.28353	Act87E;Prm;sls	GO_BP_coexpression_predicted
negative regulation of G1/S transition of mitotic cell cycle (GO:2000134)	3/168	0.00426192	0.119317	0.0108073	0.271919	-1.50929	8.23777	CG8223;pnut;tgo	GO_BP_coexpression_predicted
attachment of mitotic spindle microtubules to kinetochore (GO:0051315)	3/200	0.00690917	0.119317	0.017145	0.271919	-1.60649	7.99212	RnpS1;CG8223;pnut	GO_BP_coexpression_predicted
negative regulation of histone methylation (GO:0031061)	3/200	0.00690917	0.119317	0.017145	0.271919	-1.58866	7.90345	CG8223;pnut;tgo	GO_BP_coexpression_predicted
negative regulation of stem cell proliferation (GO:2000647)	3/200	0.00690917	0.119317	0.017145	0.271919	-1.54495	7.68598	RnpS1;CG8223;pnut	GO_BP_coexpression_predicted
striated muscle contraction (GO:0006941)	3/200	0.00690917	0.119317	0.017145	0.271919	-1.53482	7.6356	Act87E;Prm;sls	GO_BP_coexpression_predicted
negative regulation of proteasomal protein catabolic process (GO:1901799)	3/200	0.00690917	0.119317	0.017145	0.271919	-1.51398	7.53192	CG8223;pnut;tgo	GO_BP_coexpression_predicted
histone demethylation (GO:0016577)	3/200	0.00690917	0.119317	0.017145	0.271919	-1.49526	7.43877	CG8223;pnut;tgo	GO_BP_coexpression_predicted
heart contraction (GO:0060047)	3/181	0.00524466	0.119317	0.0131782	0.271919	-1.37306	7.20931	Act87E;Prm;sls	GO_BP_coexpression_predicted
actomyosin structure organization (GO:0031032)	3/200	0.00690917	0.119317	0.017145	0.271919	-1.41826	7.05573	Act87E;Prm;sls	GO_BP_coexpression_predicted
mRNA export from nucleus (GO:0006406)	3/191	0.00608629	0.119317	0.0151909	0.271919	-1.33715	6.82175	RnpS1;CG8223;pnut	GO_BP_coexpression_predicted
sarcomere organization (GO:0045214)	1/34	0.0642618	0.120018	0.0891482	0.166497	-1.75974	4.83012	sls	GO_BP_2018
eye development (GO:0001654)	2/65	0.00713228	0.120338	0.0142366	0.271919	-2.08811	10.3218	pnut;tgo	GO_BP_coexpression_predicted
positive regulation of programmed cell death (GO:0043068)	1/37	0.0697348	0.126519	0.0964266	0.174945	-1.94094	5.16883	pnut	GO_BP_2018
asymmetric protein localization (GO:0008105)	1/37	0.0697348	0.126519	0.0964266	0.174945	-1.83591	4.88913	Vha26	GO_BP_2018
regulation of smoothened signaling pathway (GO:0008589)	2/68	0.00778256	0.128574	0.015474	0.271919	-1.75833	8.53823	pnut;tgo	GO_BP_coexpression_predicted
negative regulation of post-embryonic development (GO:0048581)	2/70	0.00823043	0.130535	0.0163239	0.271919	-2.14469	10.2943	CG8223;pnut	GO_BP_coexpression_predicted
positive regulation of cellular catabolic process (GO:0031331)	2/70	0.00823043	0.130535	0.0163239	0.271919	-2.01107	9.65295	CG8223;tgo	GO_BP_coexpression_predicted
regulation of organ morphogenesis (GO:2000027)	1/40	0.0751766	0.134471	0.10365	0.185402	-2.08804	5.40366	tgo	GO_BP_2018
regulation of hemocyte proliferation (GO:0035206)	1/41	0.0769836	0.135791	0.106045	0.187052	-1.88624	4.83662	sls	GO_BP_2018
gliogenesis (GO:0042063)	1/43	0.0805873	0.135911	0.110818	0.188603	-2.06655	5.20443	tgo	GO_BP_2018
myotube differentiation (GO:0014902)	1/47	0.0877537	0.135911	0.12029	0.188603	-1.83327	4.46076	sls	GO_BP_2018
RNA processing (GO:0006396)	1/45	0.0841773	0.135911	0.115566	0.188603	-1.73547	4.29499	RnpS1	GO_BP_2018
post-embryonic animal organ development (GO:0048569)	1/46	0.0859672	0.135911	0.117931	0.188603	-1.71704	4.21326	Msp300	GO_BP_2018
positive regulation of apoptotic process (GO:0043065)	1/45	0.0841773	0.135911	0.115566	0.188603	-1.67399	4.14284	pnut	GO_BP_2018
myoblast fusion (GO:0007520)	1/47	0.0877537	0.135911	0.12029	0.188603	-1.64616	4.00547	sls	GO_BP_2018
brain development (GO:0007420)	1/44	0.082384	0.135911	0.113195	0.188603	-1.59808	3.98939	tgo	GO_BP_2018
cellular response to insulin stimulus (GO:0032869)	1/46	0.0859672	0.135911	0.117931	0.188603	-1.6173	3.96851	tgo	GO_BP_2018
muscle organ development (GO:0007517)	1/43	0.0805873	0.135911	0.110818	0.188603	-1.45913	3.67468	sls	GO_BP_2018
regulation of nucleic acid-templated transcription (GO:1903506)	2/246	0.0829913	0.135911	0.139714	0.20875	-1.22443	3.04762	CG4820;tgo	GO_BP_2018
regulation of cellular macromolecule biosynthetic process (GO:2000112)	2/266	0.0947715	0.145012	0.158211	0.22258	-1.20968	2.85035	CG4820;tgo	GO_BP_2018
chromosome condensation (GO:0030261)	1/53	0.0984013	0.147023	0.134319	0.205524	-1.86465	4.32356	sls	GO_BP_2018
organonitrogen compound biosynthetic process (GO:1901566)	1/53	0.0984013	0.147023	0.134319	0.205524	-1.62156	3.75991	yellow-f	GO_BP_2018
apoptotic process (GO:0006915)	1/55	0.101924	0.149883	0.138948	0.20875	-1.54017	3.51702	pnut	GO_BP_2018
negative regulation of transcription, DNA-templated (GO:0045892)	2/279	0.102676	0.149883	0.17049	0.228192	-0.920772	2.09584	Maf1;tgo	GO_BP_2018
monovalent inorganic cation transport (GO:0015672)	1/57	0.105432	0.152158	0.143553	0.211991	-1.33969	3.01388	SK	GO_BP_2018
metal ion transport (GO:0030001)	1/58	0.107182	0.152945	0.145847	0.212902	-1.47559	3.29534	SK	GO_BP_2018
asymmetric protein localization (GO:0008105)	2/83	0.0114146	0.153603	0.02232	0.272934	-2.19752	9.82921	pnut;tgo	GO_BP_coexpression_predicted
negative regulation of hemopoiesis (GO:1903707)	2/81	0.0108945	0.153603	0.0213456	0.272934	-2.04299	9.23329	CG8223;pnut	GO_BP_coexpression_predicted
negative regulation of plasmatocyte differentiation (GO:0045614)	2/81	0.0108945	0.153603	0.0213456	0.272934	-2.03673	9.20501	CG8223;pnut	GO_BP_coexpression_predicted
regulation of canonical Wnt signaling pathway (GO:0060828)	2/83	0.0114146	0.153603	0.02232	0.272934	-1.98285	8.86903	pnut;tgo	GO_BP_coexpression_predicted
regulation of response to biotic stimulus (GO:0002831)	2/79	0.0103852	0.153603	0.0203897	0.272934	-1.92173	8.77724	CG8223;pnut	GO_BP_coexpression_predicted
negative regulation of smoothened signaling pathway (GO:0045879)	2/80	0.0106385	0.153603	0.0208653	0.272934	-1.80405	8.19628	pnut;tgo	GO_BP_coexpression_predicted
negative regulation of lamellocyte differentiation (GO:0035204)	2/81	0.0108945	0.153603	0.0213456	0.272934	-1.76838	7.99219	CG8223;pnut	GO_BP_coexpression_predicted
cellular response to sterol (GO:0036315)	2/90	0.0133195	0.153603	0.0258737	0.272934	-1.84026	7.94722	pnut;tgo	GO_BP_coexpression_predicted
cellular response to ketone (GO:1901655)	2/90	0.0133195	0.153603	0.0258737	0.272934	-1.83875	7.94069	pnut;tgo	GO_BP_coexpression_predicted
negative regulation of neuron death (GO:1901215)	1/21	0.040181	0.153603	0.0587865	0.272934	-2.46307	7.91719	pnut	GO_BP_coexpression_predicted
negative regulation of canonical Wnt signaling pathway (GO:0090090)	2/87	0.0124872	0.153603	0.0243237	0.272934	-1.77819	7.79391	pnut;tgo	GO_BP_coexpression_predicted
heart development (GO:0007507)	2/90	0.0133195	0.153603	0.0258737	0.272934	-1.79556	7.75419	pnut;tgo	GO_BP_coexpression_predicted
sensory organ development (GO:0007423)	2/84	0.0116787	0.153603	0.0228141	0.272934	-1.7301	7.6989	pnut;tgo	GO_BP_coexpression_predicted
protein-DNA complex subunit organization (GO:0071824)	2/109	0.0191266	0.153603	0.0365834	0.272934	-1.929	7.63243	CG8223;pnut	GO_BP_coexpression_predicted
central nervous system development (GO:0007417)	2/96	0.0150546	0.153603	0.029092	0.272934	-1.80619	7.57892	pnut;tgo	GO_BP_coexpression_predicted
histone H4 acetylation (GO:0043967)	2/93	0.0141754	0.153603	0.0274633	0.272934	-1.7351	7.38504	CG8223;pnut	GO_BP_coexpression_predicted
spliceosomal conformational changes to generate catalytic conformation (GO:0000393)	2/104	0.0175108	0.153603	0.0336204	0.272934	-1.79836	7.27426	RnpS1;pnut	GO_BP_coexpression_predicted
ventral cord development (GO:0007419)	2/106	0.0181498	0.153603	0.0347936	0.272934	-1.77398	7.11207	pnut;tgo	GO_BP_coexpression_predicted
negative regulation of cellular response to insulin stimulus (GO:1900077)	2/100	0.0162626	0.153603	0.0313229	0.272934	-1.72513	7.10561	CG8223;pnut	GO_BP_coexpression_predicted
regulation of DNA endoreduplication (GO:0032875)	2/112	0.0201253	0.153603	0.0384086	0.272934	-1.81839	7.10221	CG8223;pnut	GO_BP_coexpression_predicted
Notch signaling pathway (GO:0007219)	2/93	0.0141754	0.153603	0.0274633	0.272934	-1.62513	6.91697	pnut;tgo	GO_BP_coexpression_predicted
histone H3-K9 modification (GO:0061647)	2/111	0.01979	0.153603	0.0377963	0.272934	-1.76209	6.91192	CG8223;pnut	GO_BP_coexpression_predicted
negative regulation of histone modification (GO:0031057)	2/118	0.0221869	0.153603	0.0421629	0.272934	-1.77207	6.74849	pnut;tgo	GO_BP_coexpression_predicted
gland development (GO:0048732)	2/103	0.017195	0.153603	0.0330399	0.272934	-1.63149	6.62895	pnut;tgo	GO_BP_coexpression_predicted
dendrite guidance (GO:0070983)	2/92	0.0138875	0.153603	0.0269291	0.272934	-1.53544	6.56672	pnut;tgo	GO_BP_coexpression_predicted
gastrulation involving germ band extension (GO:0010004)	2/98	0.0156535	0.153603	0.030199	0.272934	-1.54515	6.42327	pnut;tgo	GO_BP_coexpression_predicted
sex comb development (GO:0045498)	2/101	0.0165709	0.153603	0.0318911	0.272934	-1.55442	6.37327	pnut;tgo	GO_BP_coexpression_predicted
mRNA processing (GO:0006397)	2/100	0.0162626	0.153603	0.0313229	0.272934	-1.54585	6.36717	RnpS1;pnut	GO_BP_coexpression_predicted
negative regulation of insulin receptor signaling pathway (GO:0046627)	2/100	0.0162626	0.153603	0.0313229	0.272934	-1.52462	6.27974	CG8223;pnut	GO_BP_coexpression_predicted
mRNA splicing, via spliceosome (GO:0000398)	2/113	0.020463	0.153603	0.0390248	0.272934	-1.60526	6.24309	RnpS1;pnut	GO_BP_coexpression_predicted
RNA splicing, via transesterification reactions with bulged adenosine as nucleophile (GO:0000377)	2/114	0.0208031	0.153603	0.0396448	0.272934	-1.61147	6.24068	RnpS1;pnut	GO_BP_coexpression_predicted
renal tubule morphogenesis (GO:0061333)	2/143	0.0316563	0.153603	0.0591953	0.272934	-1.80363	6.22759	pnut;tgo	GO_BP_coexpression_predicted
positive regulation of chromatin organization (GO:1905269)	2/135	0.0284768	0.153603	0.0535127	0.272934	-1.73881	6.18785	CG8223;pnut	GO_BP_coexpression_predicted
gonad development (GO:0008406)	2/123	0.0239691	0.153603	0.0453942	0.272934	-1.64736	6.14628	pnut;tgo	GO_BP_coexpression_predicted
embryo development ending in birth or egg hatching (GO:0009792)	1/21	0.040181	0.153603	0.0587865	0.272934	-1.90733	6.13085	pnut	GO_BP_coexpression_predicted
DNA-templated transcription, elongation (GO:0006354)	2/133	0.0277034	0.153603	0.0521251	0.272934	-1.70559	6.11657	RnpS1;CG8223	GO_BP_coexpression_predicted
pre-miRNA processing (GO:0031054)	2/110	0.0194571	0.153603	0.0371879	0.272934	-1.55209	6.11451	RnpS1;pnut	GO_BP_coexpression_predicted
Malpighian tubule morphogenesis (GO:0007443)	2/115	0.0211455	0.153603	0.0402687	0.272934	-1.58201	6.10073	pnut;tgo	GO_BP_coexpression_predicted
mRNA cis splicing, via spliceosome (GO:0045292)	2/102	0.0168817	0.153603	0.0324634	0.272934	-1.47495	6.02006	RnpS1;pnut	GO_BP_coexpression_predicted
regulation of mRNA 3'-end processing (GO:0031440)	2/111	0.01979	0.153603	0.0377963	0.272934	-1.53	6.00154	RnpS1;pnut	GO_BP_coexpression_predicted
negative regulation of signal transduction (GO:0009968)	1/27	0.0513693	0.153603	0.0742402	0.272934	-1.99108	5.91095	pnut	GO_BP_coexpression_predicted
anterior/posterior axis specification, embryo (GO:0008595)	2/119	0.0225387	0.153603	0.0428018	0.272934	-1.54563	5.86184	pnut;tgo	GO_BP_coexpression_predicted
positive regulation of transcription elongation from RNA polymerase II promoter (GO:0032968)	2/118	0.0221869	0.153603	0.0421629	0.272934	-1.50277	5.72292	pnut;tgo	GO_BP_coexpression_predicted
regulation of hippo signaling (GO:0035330)	2/137	0.0292589	0.153603	0.0549137	0.272934	-1.60453	5.66653	pnut;tgo	GO_BP_coexpression_predicted
regulation of gene expression, epigenetic (GO:0040029)	2/141	0.0308487	0.153603	0.0577551	0.272934	-1.62608	5.65659	pnut;tgo	GO_BP_coexpression_predicted
positive regulation of protein phosphorylation (GO:0001934)	1/27	0.0513693	0.153603	0.0742402	0.272934	-1.87045	5.55285	tgo	GO_BP_coexpression_predicted
regulation of MyD88-dependent toll-like receptor signaling pathway (GO:0034124)	2/149	0.034129	0.153603	0.0635914	0.272934	-1.64146	5.54419	CG8223;pnut	GO_BP_coexpression_predicted
regulation of mRNA processing (GO:0050684)	2/119	0.0225387	0.153603	0.0428018	0.272934	-1.46003	5.53718	pnut;tgo	GO_BP_coexpression_predicted
regulation of transposition, DNA-mediated (GO:0000337)	2/141	0.0308487	0.153603	0.0577551	0.272934	-1.58821	5.52483	CG8223;pnut	GO_BP_coexpression_predicted
negative regulation of transposition, DNA-mediated (GO:0000335)	2/141	0.0308487	0.153603	0.0577551	0.272934	-1.5818	5.50253	CG8223;pnut	GO_BP_coexpression_predicted
cuticle pattern formation (GO:0035017)	2/142	0.0312515	0.153603	0.0584736	0.272934	-1.58357	5.48817	pnut;tgo	GO_BP_coexpression_predicted
negative regulation of macromolecule metabolic process (GO:0010605)	2/144	0.0320633	0.153603	0.0599201	0.272934	-1.56817	5.39456	pnut;tgo	GO_BP_coexpression_predicted
oenocyte development (GO:0007438)	2/119	0.0225387	0.153603	0.0428018	0.272934	-1.41856	5.37993	pnut;tgo	GO_BP_coexpression_predicted
regulation of transcriptional start site selection at RNA polymerase II promoter (GO:0001178)	2/132	0.02732	0.153603	0.0514364	0.272934	-1.48487	5.34574	RnpS1;pnut	GO_BP_coexpression_predicted
regulation of methylation-dependent chromatin silencing (GO:0090308)	2/170	0.0433482	0.153603	0.0798154	0.272934	-1.65431	5.19204	CG8223;pnut	GO_BP_coexpression_predicted
adrenergic receptor signaling pathway (GO:0071875)	2/200	0.0579159	0.153603	0.104975	0.272934	-1.7995	5.12636	SK;dpr7	GO_BP_coexpression_predicted
positive regulation of mitotic metaphase/anaphase transition (GO:0045842)	2/162	0.0397355	0.153603	0.0734877	0.272934	-1.58786	5.12165	CG8223;pnut	GO_BP_coexpression_predicted
regulation of neuron differentiation (GO:0045664)	2/134	0.0280891	0.153603	0.0528172	0.272934	-1.43174	5.11471	pnut;tgo	GO_BP_coexpression_predicted
positive regulation of chromatin silencing (GO:0031937)	2/153	0.0358184	0.153603	0.0665835	0.272934	-1.52261	5.06921	CG8223;pnut	GO_BP_coexpression_predicted
regulation of multicellular organismal development (GO:2000026)	2/170	0.0433482	0.153603	0.0798154	0.272934	-1.60414	5.03459	pnut;tgo	GO_BP_coexpression_predicted
head involution (GO:0008258)	1/29	0.0550705	0.153603	0.0793376	0.272934	-1.72828	5.01053	pnut	GO_BP_coexpression_predicted
synaptonemal complex organization (GO:0070193)	2/148	0.0337118	0.153603	0.0628509	0.272934	-1.45081	4.9181	CG8223;pnut	GO_BP_coexpression_predicted
amine transport (GO:0015837)	2/200	0.0579159	0.153603	0.104975	0.272934	-1.72335	4.90942	SK;dpr7	GO_BP_coexpression_predicted
associative learning (GO:0008306)	2/200	0.0579159	0.153603	0.104975	0.272934	-1.7196	4.89874	SK;dpr7	GO_BP_coexpression_predicted
basal protein localization (GO:0045175)	2/159	0.0384122	0.153603	0.0711604	0.272934	-1.49638	4.87728	pnut;tgo	GO_BP_coexpression_predicted
regulation of primary metabolic process (GO:0080090)	2/155	0.0366751	0.153603	0.0680974	0.272934	-1.47086	4.86216	Maf1;scramb1	GO_BP_coexpression_predicted
morphogenesis of an epithelium (GO:0002009)	2/185	0.0504379	0.153603	0.0921284	0.272934	-1.61393	4.82083	pnut;tgo	GO_BP_coexpression_predicted
positive regulation of metaphase/anaphase transition of cell cycle (GO:1902101)	2/162	0.0397355	0.153603	0.0734877	0.272934	-1.48448	4.78819	CG8223;pnut	GO_BP_coexpression_predicted
positive regulation of mitotic sister chromatid separation (GO:1901970)	2/162	0.0397355	0.153603	0.0734877	0.272934	-1.48443	4.78804	CG8223;pnut	GO_BP_coexpression_predicted
induction of programmed cell death by ecdysone (GO:0035078)	2/172	0.04427	0.153603	0.0814241	0.272934	-1.53339	4.78027	pnut;tgo	GO_BP_coexpression_predicted
glial cell migration (GO:0008347)	2/157	0.0375397	0.153603	0.0696231	0.272934	-1.4562	4.77975	pnut;tgo	GO_BP_coexpression_predicted
postsynapse assembly (GO:0099068)	2/200	0.0579159	0.153603	0.104975	0.272934	-1.67457	4.77047	SK;dpr7	GO_BP_coexpression_predicted
anesthesia-resistant memory (GO:0007615)	2/200	0.0579159	0.153603	0.104975	0.272934	-1.67341	4.76716	SK;dpr7	GO_BP_coexpression_predicted
negative regulation of salivary gland boundary specification (GO:0045705)	2/171	0.0438082	0.153603	0.0806185	0.272934	-1.51878	4.75065	pnut;tgo	GO_BP_coexpression_predicted
chemical synaptic transmission (GO:0007268)	2/200	0.0579159	0.153603	0.104975	0.272934	-1.6659	4.74574	SK;dpr7	GO_BP_coexpression_predicted
ERAD pathway (GO:0036503)	2/200	0.0579159	0.153603	0.104975	0.272934	-1.65704	4.72053	CG1598;CG4822	GO_BP_coexpression_predicted
olfactory learning (GO:0008355)	2/200	0.0579159	0.153603	0.104975	0.272934	-1.65265	4.708	SK;dpr7	GO_BP_coexpression_predicted
primary miRNA processing (GO:0031053)	2/164	0.0406273	0.153603	0.0750532	0.272934	-1.46558	4.69472	RnpS1;pnut	GO_BP_coexpression_predicted
cell fate commitment involved in formation of primary germ layer (GO:0060795)	2/200	0.0579159	0.153603	0.104975	0.272934	-1.64389	4.68304	pnut;tgo	GO_BP_coexpression_predicted
regulation of neuroblast proliferation (GO:1902692)	2/150	0.0345483	0.153603	0.0643349	0.272934	-1.38901	4.67458	CG8223;pnut	GO_BP_coexpression_predicted
dosage compensation (GO:0007549)	2/159	0.0384122	0.153603	0.0711604	0.272934	-1.43395	4.6738	pnut;tgo	GO_BP_coexpression_predicted
[truncated: 941 more rows]

## Sheet: 24h_Slmap-IR_GO_cellComponent
Term	Overlap	P-value	Adjusted P-value	Old P-value	Old Adjusted P-value	Z-score	Combined Score	Genes	enrichR_category
[truncated: 187 more rows]

[truncated: 22 more sheets: 24h_Yki-IR_phenotypes, 24h_Yki-IR_GO_biolProcess, 24h_Yki-IR_GO_cellComponent, 24h_YkiCA GO biolProcess, 24h_YkiCA GO cellComponent, 24h_hippoIR GO biolProcess, 24h_hippoIR GO cellComponent, 32h_YkiCA_phenotype, 32h_YkiCA_GO_biolProcess, 32h_YkiCA_GO_cellComponent, 32h_hippoIR_phenotpe, 32h_hippoIR_GO_biolProcess, 32h_hippoIR_GO_cellComponent, 32h_GOF_common_phenotype, 32h_GOF_common GO BP, 32h_GOF_common GO CC, 32h_GOF_commonUP phenotype, 32h_GOF_commonUP GO BP, 32h_GOF_commonUP GO CC, 32h_GOF_commonDOWN GO phenotype …]
