# Supplementary figures and images for: The Hippo pathway controls myofibril assembly and muscle fiber growth by regulating sarcomeric gene expression
Source: eLife journal article supplement (doi:10.7554/elife.63726), 2021-01-06

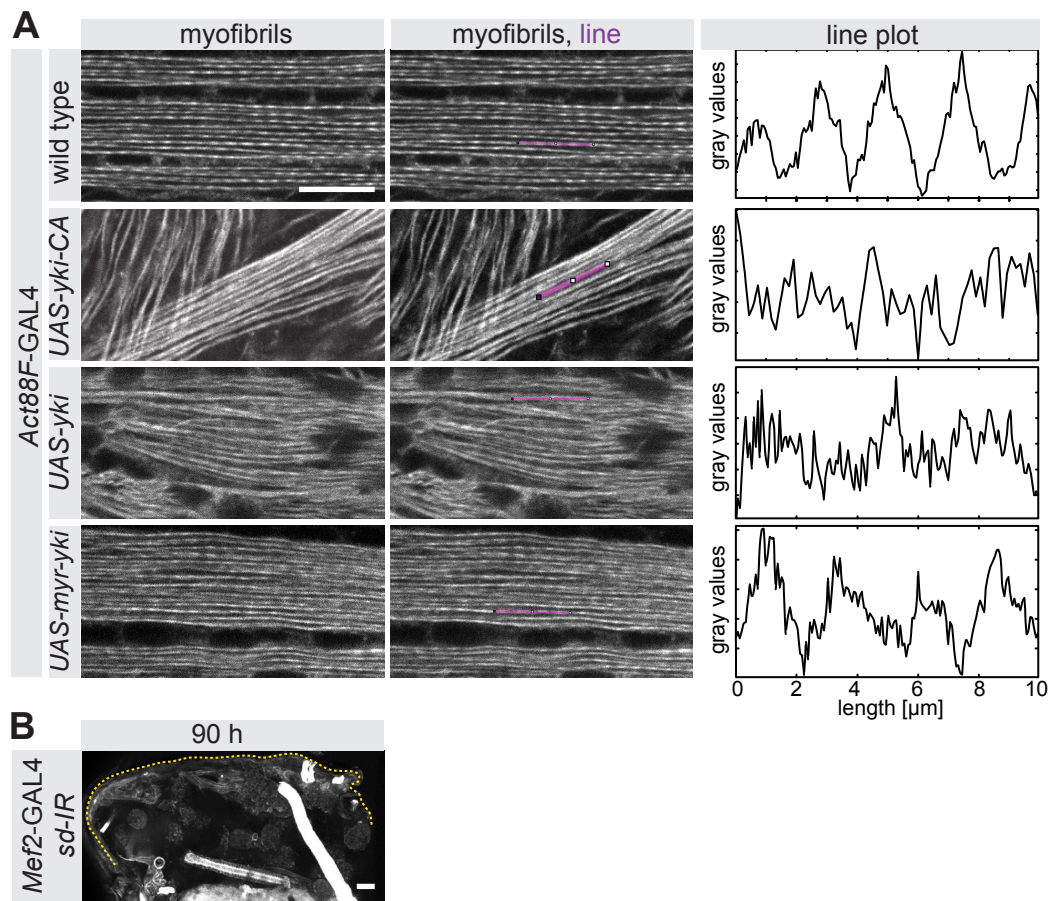

**Figure 7 - Supplement 2**

Supplement: supp [file elife-63726-supp-v1.zip]

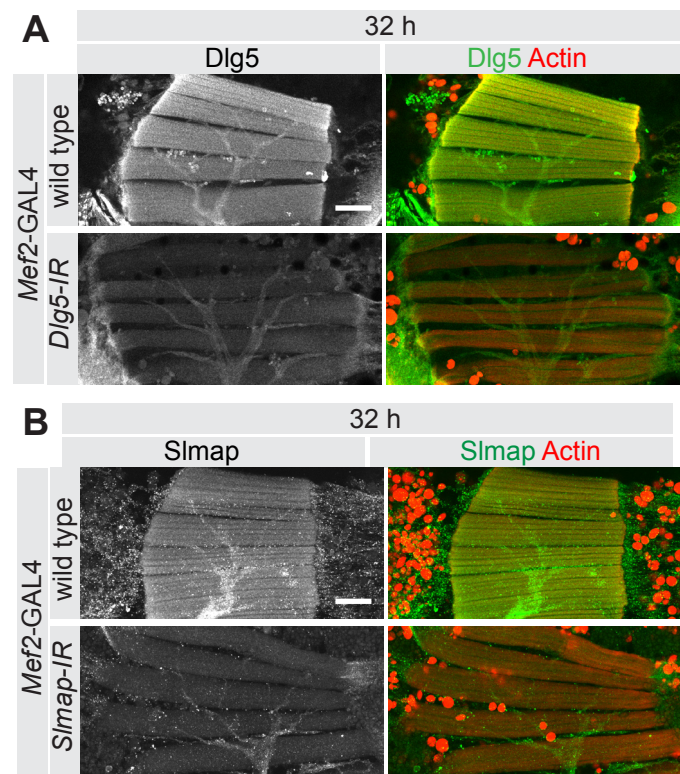

**Figure 2 Supplement 1**

Supplement: supp [file elife-63726-supp-v1.zip]

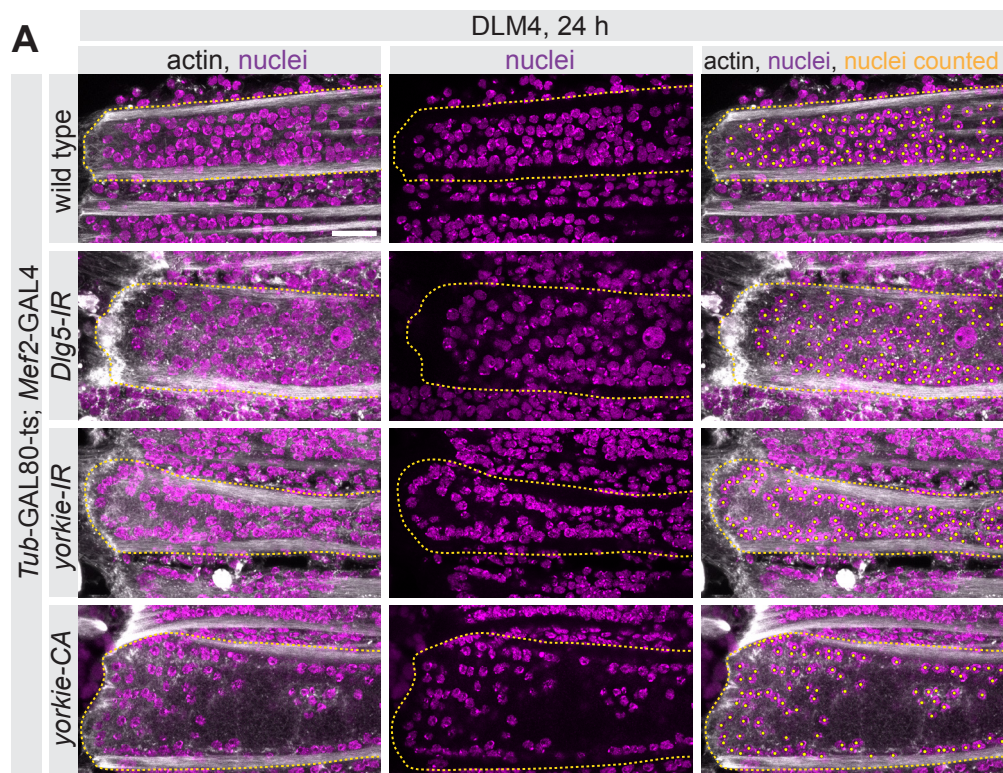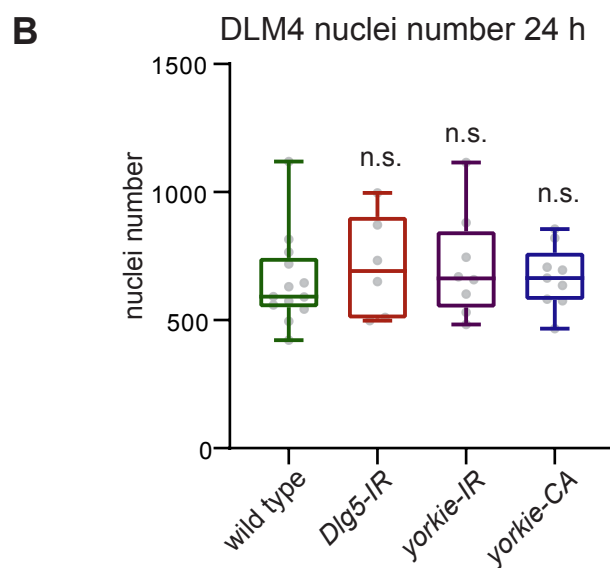

**Figure 5 - Supplement 1**

Supplement: supp [file elife-63726-supp-v1.zip]

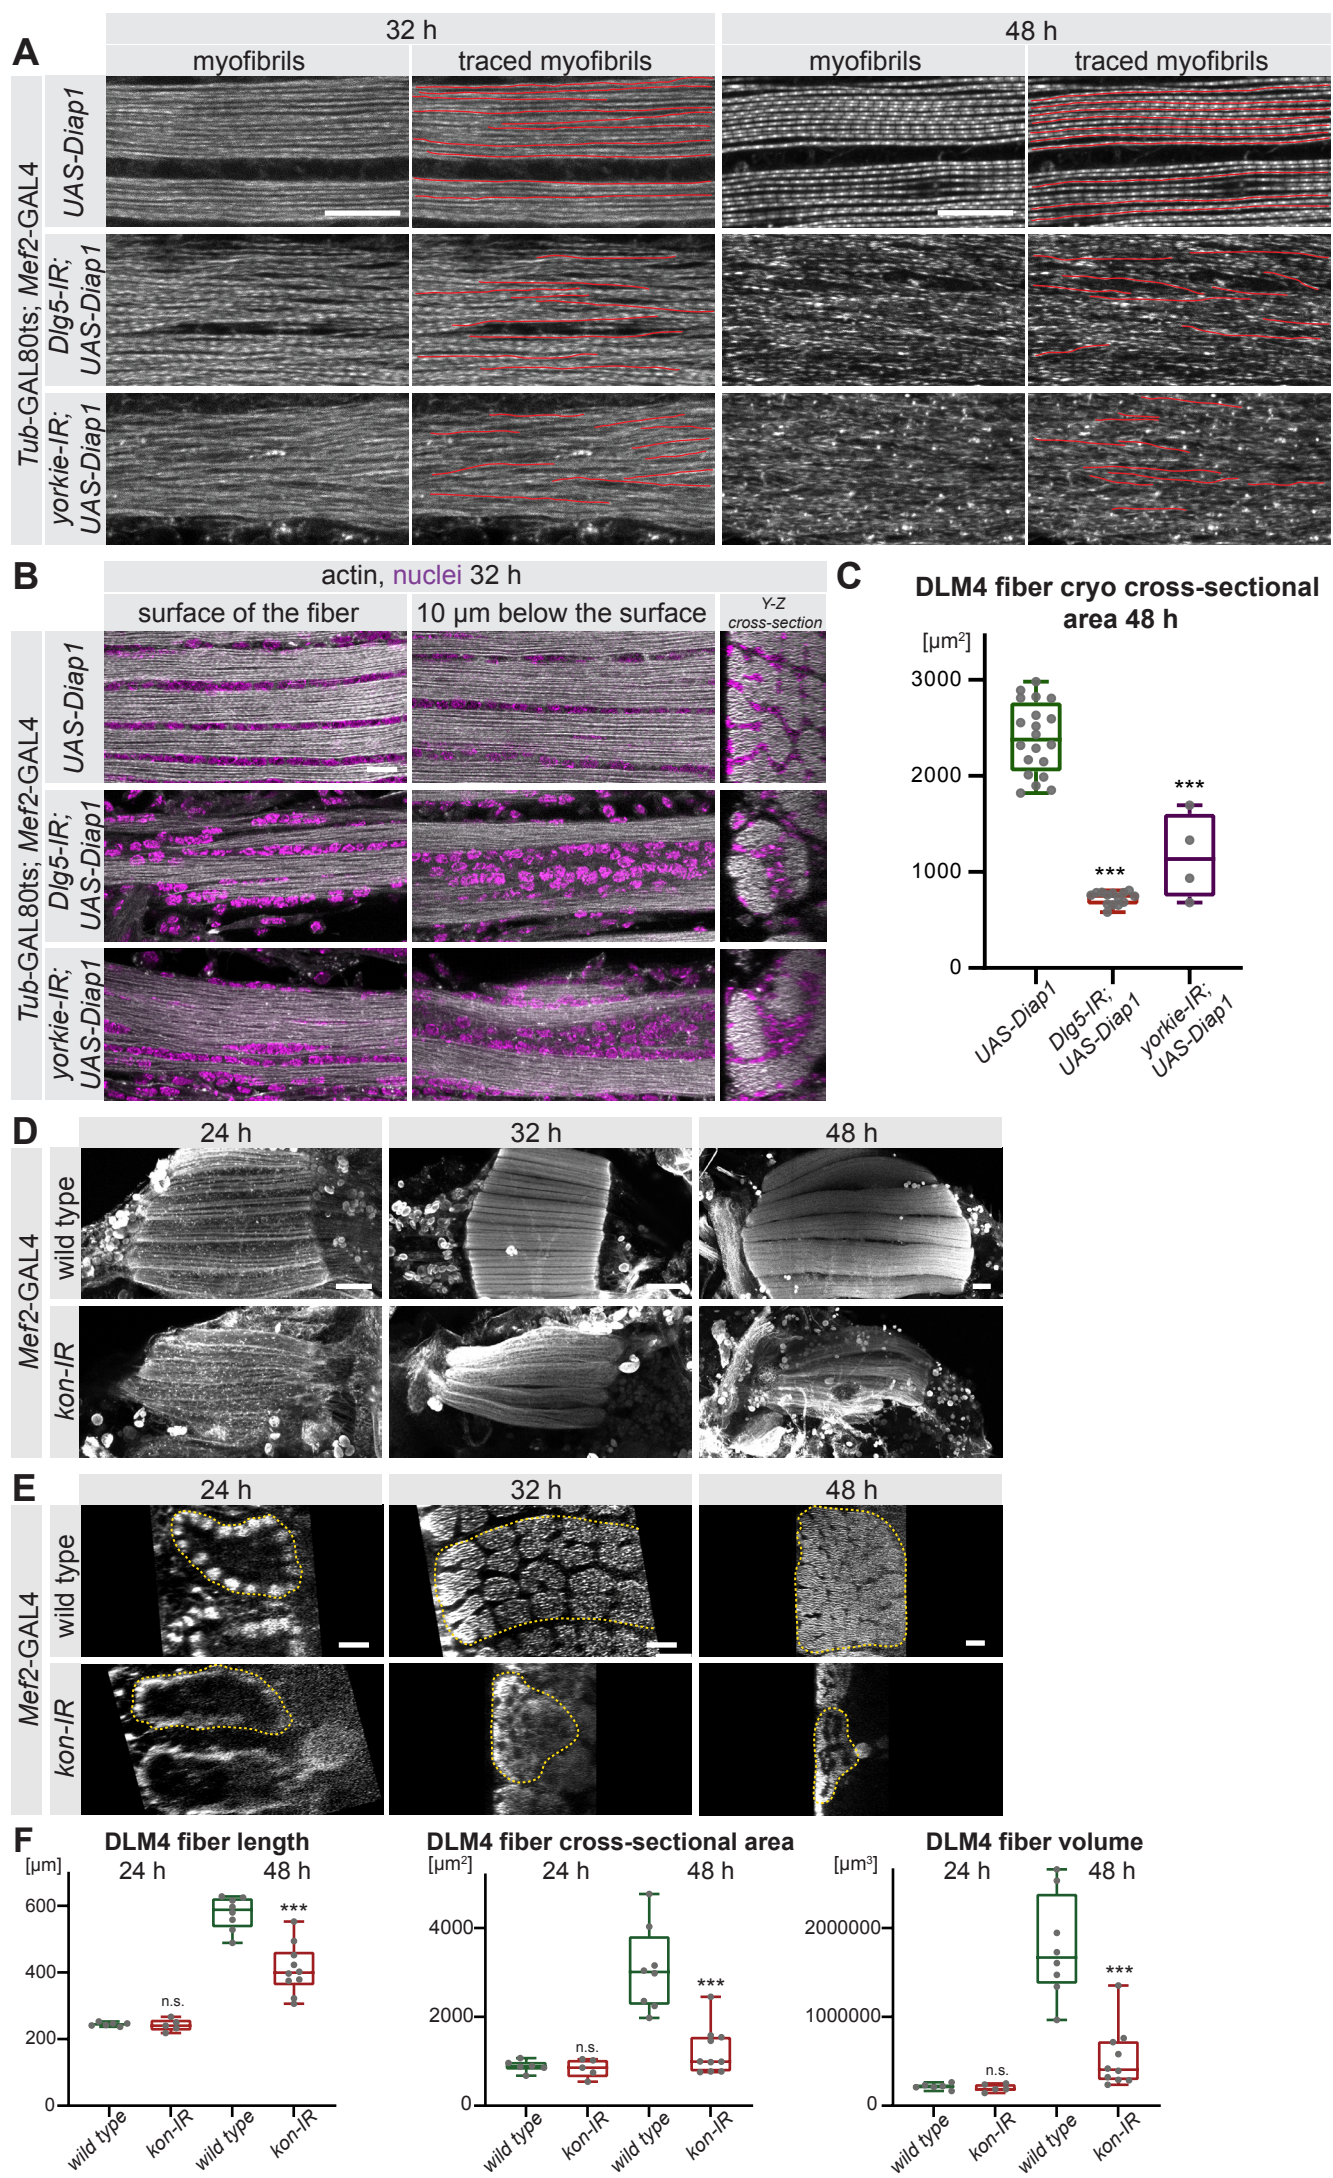

**Figure 7 - Supplement 1**

Supplement: supp [file elife-63726-supp-v1.zip]

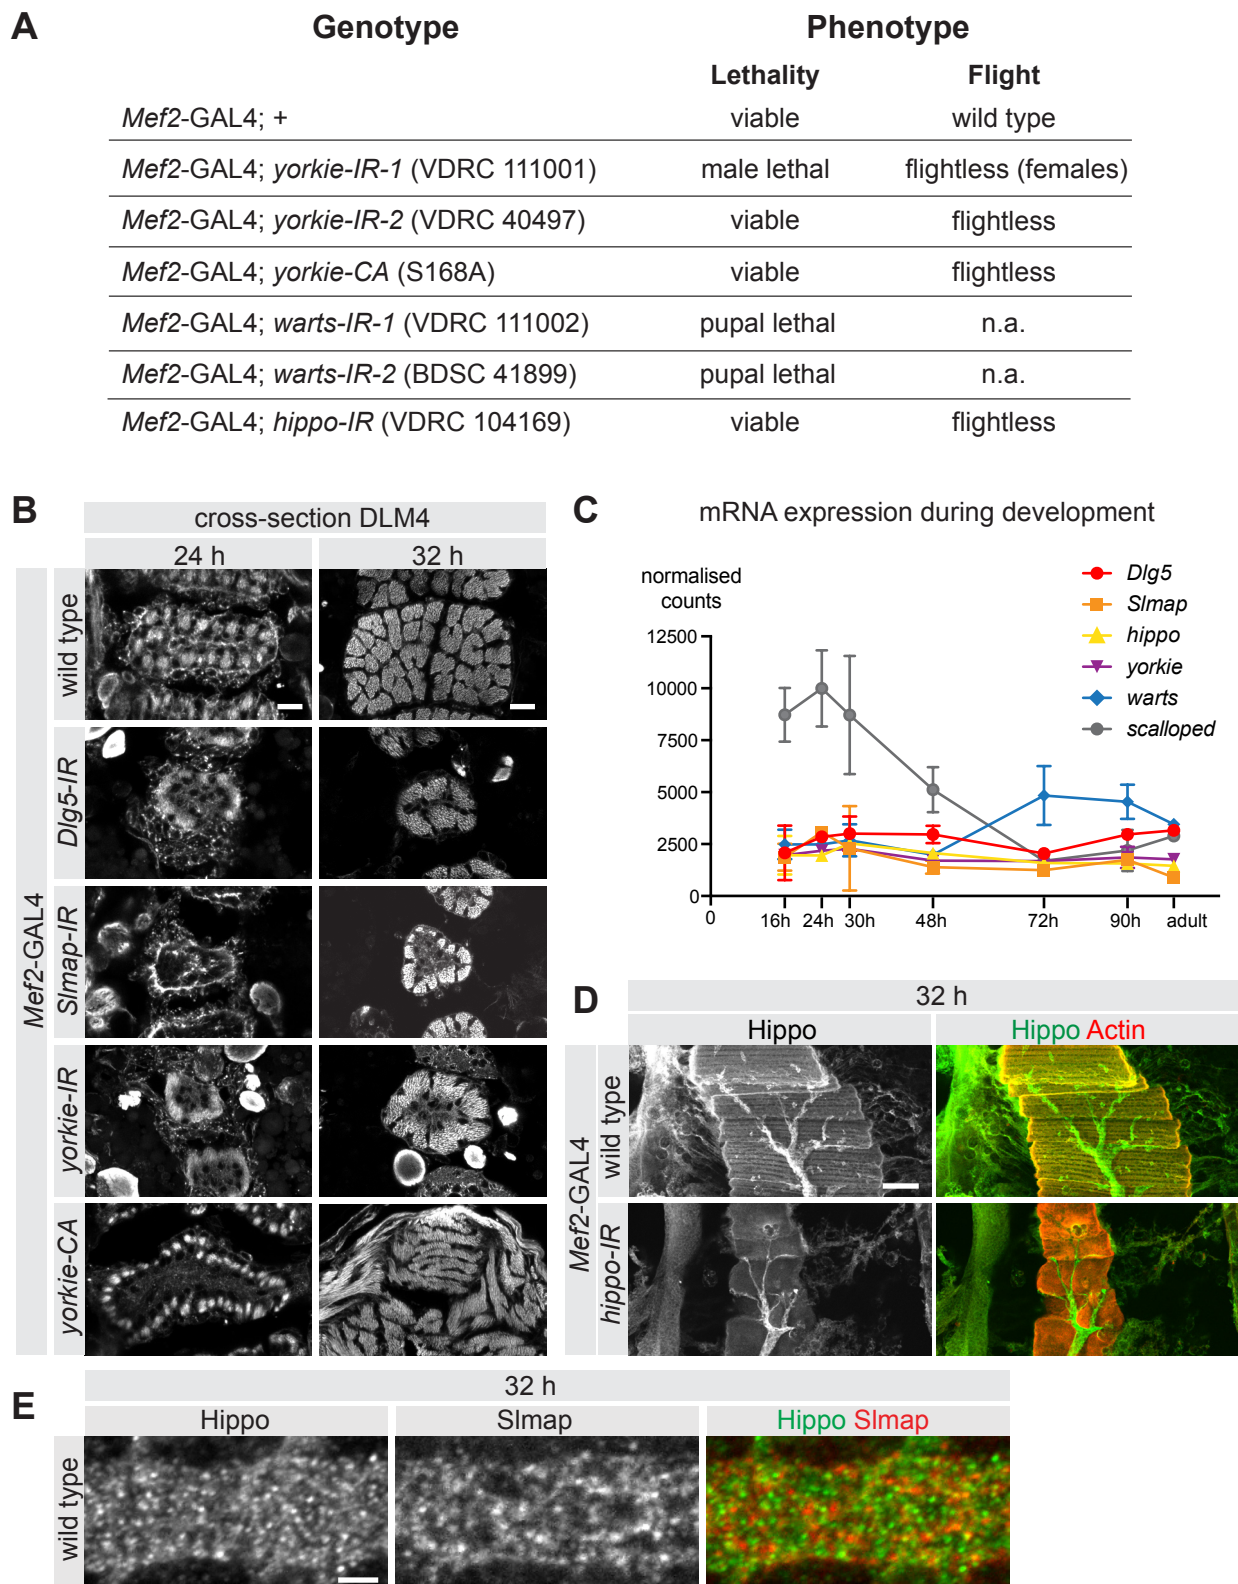

Figure 4 - Supplement 1

Supplement: supp [file elife-63726-supp-v1.zip]

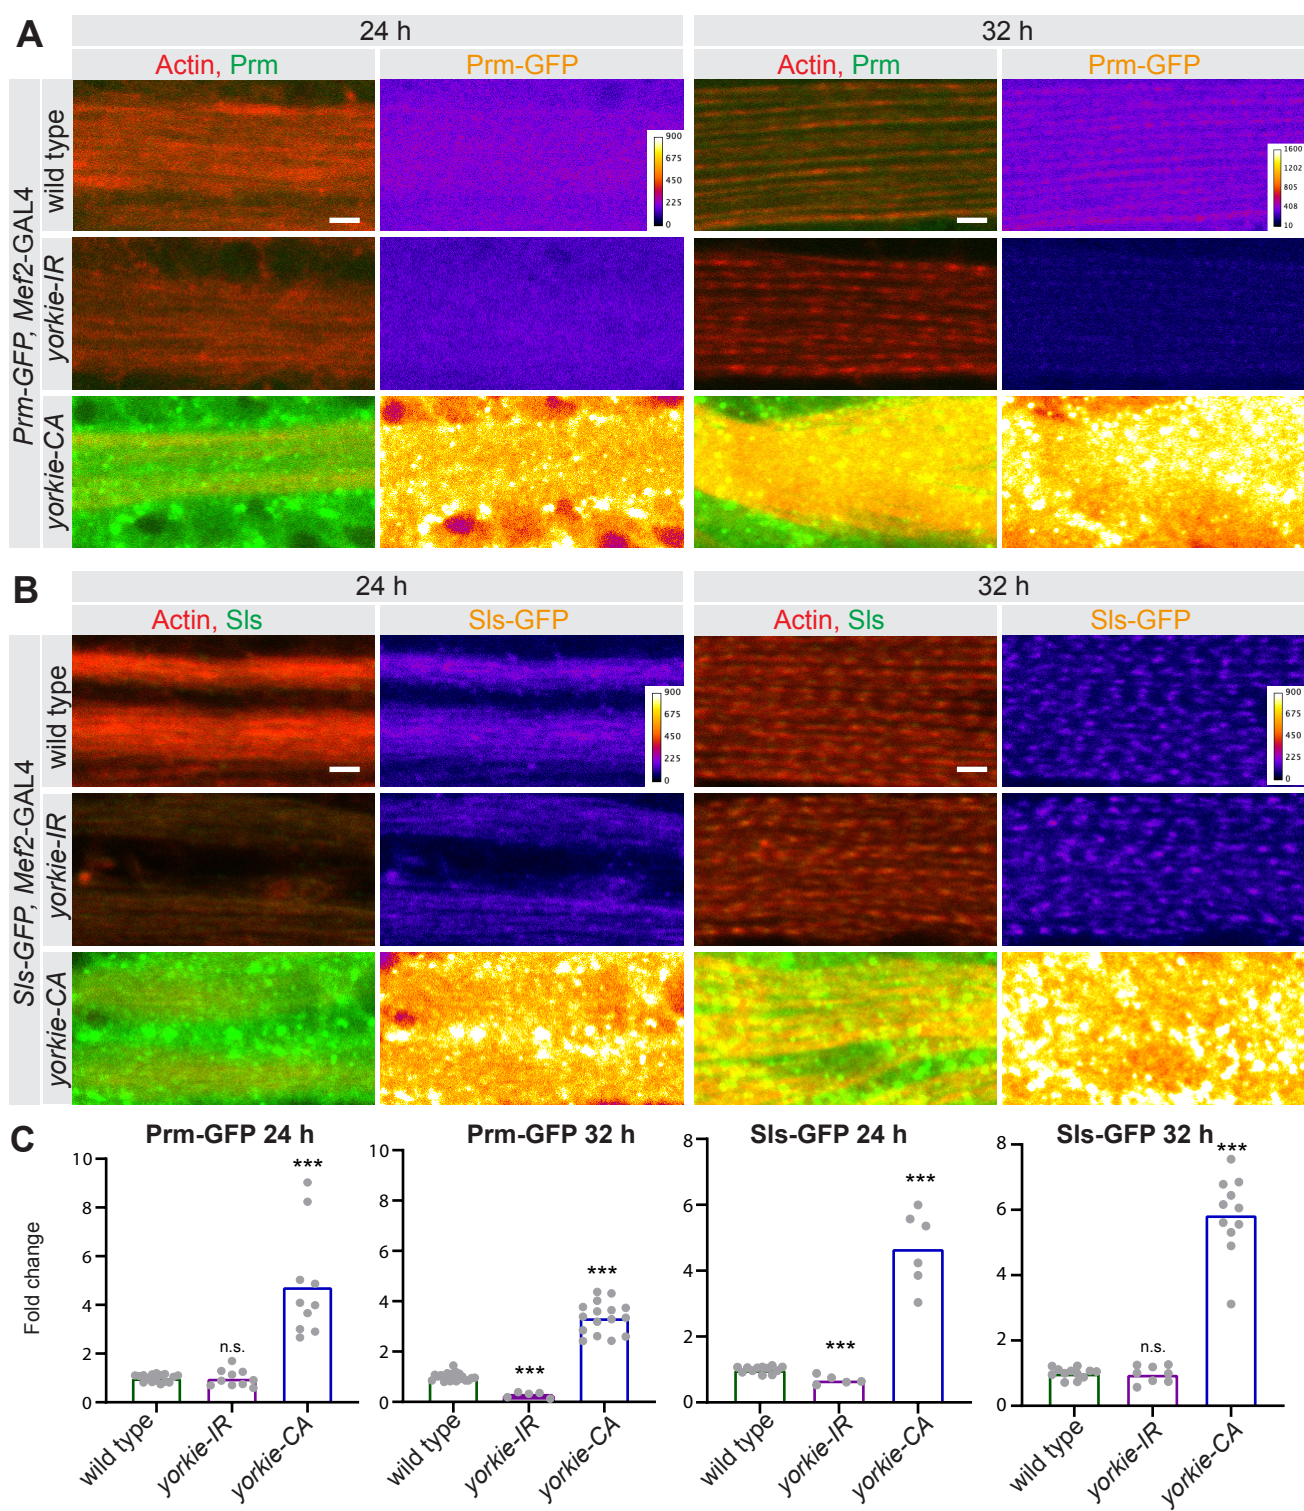

**Figure 9 Supplement 1**

Supplement: supp [file elife-63726-supp-v1.zip]

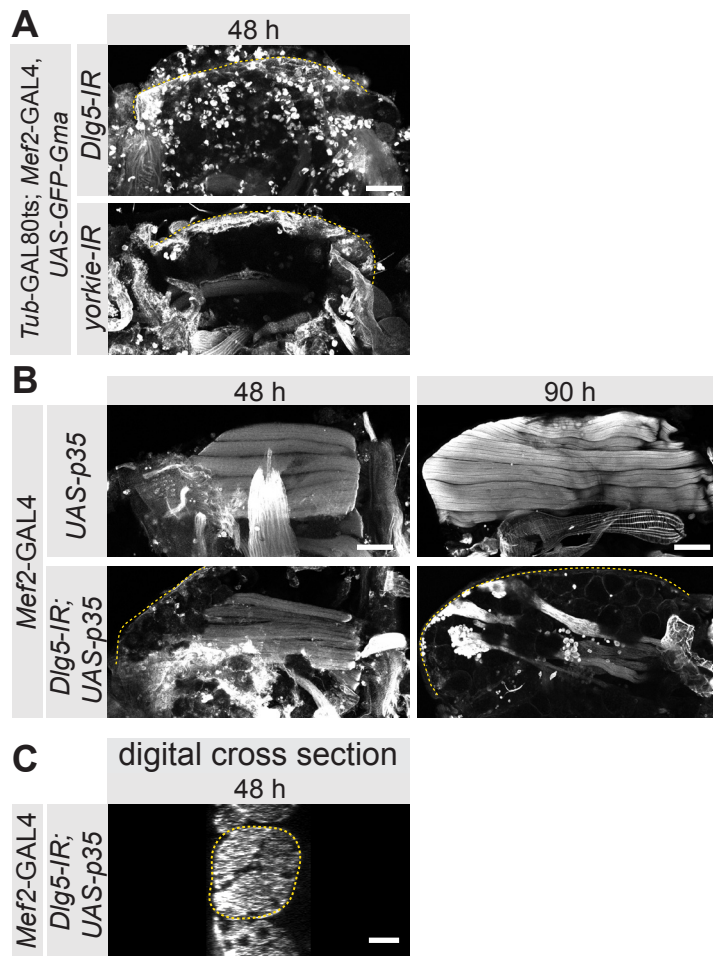

**Figure 6 Supplement 1**

Supplement: supp [file elife-63726-supp-v1.zip]

**A**

**PCA plot 24 h and 32 h**

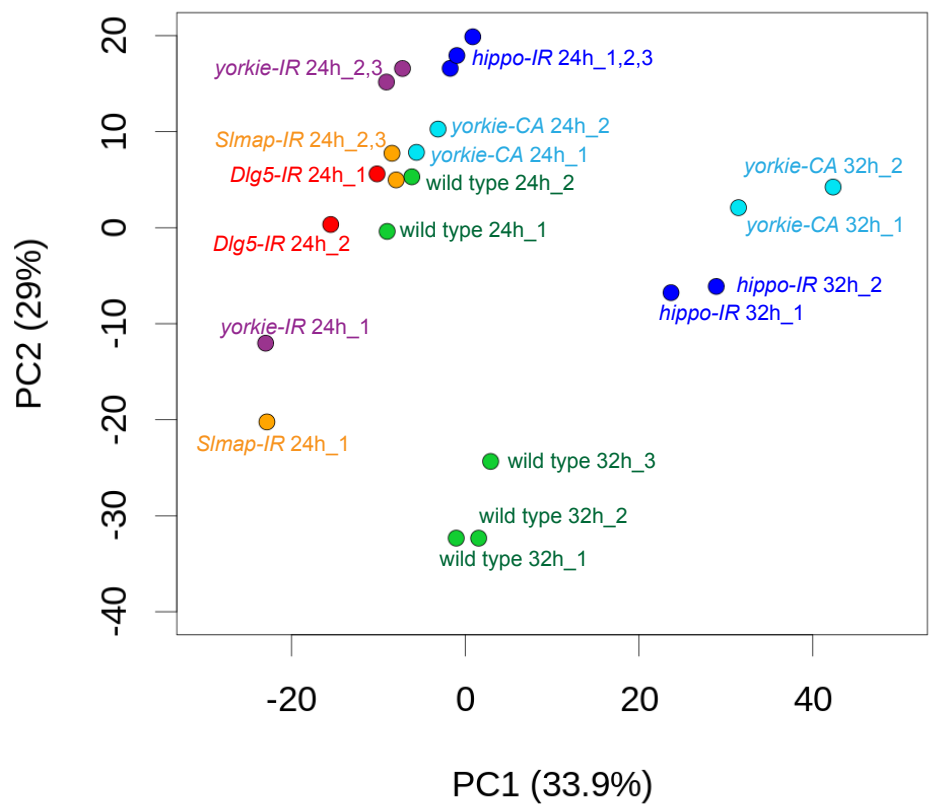

**B**

**Read count distribution 24 h**

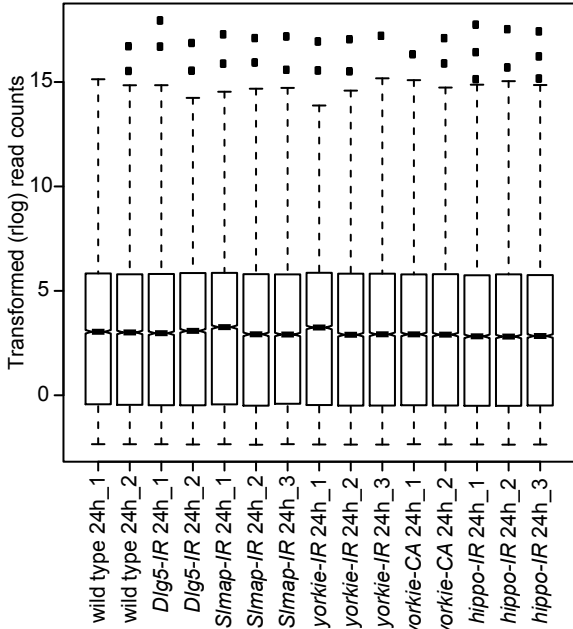

**C**

**Read count distribution 32 h**

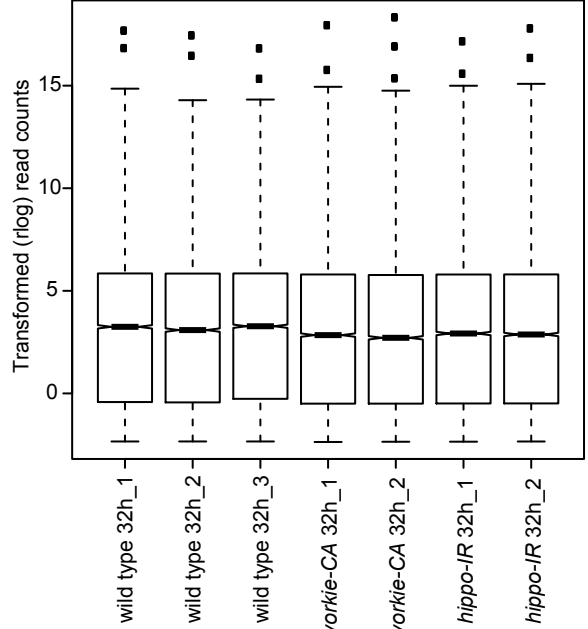

**Figure 8 Supplement 1**

Supplement: supp [file elife-63726-supp-v1.zip]
